# Supplementary material for: Crystal structures of bacterial small multidrug resistance transporter EmrE in complex with structurally diverse substrates
Source: eLife. 2022 Mar 7;11:e76766. doi: 10.7554/eLife.76766 (PMC9000954; doi:10.7554/eLife.76766)
Supplement: Figure 1—source data 1. [file elife-76766-fig1-data1.xlsx]

## Sheet: Sheet1
EmrE	Time (sec)	30 µM	100 µM	300 µM	1 mM	3 mM		EmrE	Time (sec)	30 µM	100 µM	300 µM	1 mM	3 mM		EmrE3	Time (sec)	30 µM	100 µM	300 µM	1 mM	3 mM		EmrE3	Time (sec)	30 µM	100 µM	300 µM	1 mM	3 mM
TPA	0	0.05773	0.0679115	0.0755476	0.0564573	0.0590027		Phe	0	0.0526392	0.0462758	0.0450031	0.05773	0.0348216		TPA	0	-0.257897	-0.167536	-0.161173	-0.130628	-0.120447		Phe	0	0.130273	0.0730023	0.0984561	0.103547	0.0971834
	0.001	0.0640934	0.0717296	0.0666388	0.0564573	0.0666388			0.001	0.0539119	0.0437304	0.0564573	0.041185	0.041185			0.001	-0.238807	-0.164991	-0.148446	-0.142082	-0.134446			0.001	0.126455	0.0730023	0.106092	0.118819	0.0997288
	0.002	0.0602754	0.0730023	0.0793657	0.0513665	0.05773			0.002	0.0513665	0.041185	0.0513665	0.0488212	0.0386396			0.002	-0.242625	-0.186626	-0.1599	-0.136991	-0.108992			0.002	0.141728	0.0908199	0.0959107	0.0870019	0.0920926
	0.003	0.061548	0.0806384	0.0704569	0.0539119	0.0488212			0.003	0.0475485	0.0450031	0.0424577	0.037367	0.0399123			0.003	-0.224807	-0.17899	-0.1739	-0.143355	-0.114083			0.003	0.113728	0.102274	0.10991	0.0895472	0.108638
	0.004	0.0602754	0.0666388	0.0691842	0.0564573	0.0500939			0.004	0.0424577	0.0475485	0.05773	0.0386396	0.0310035			0.004	-0.233716	-0.1739	-0.154809	-0.154809	-0.130628			0.004	0.126455	0.0717296	0.0870019	0.104819	0.0984561
	0.005	0.0666388	0.0704569	0.074275	0.0564573	0.061548			0.005	0.0539119	0.0399123	0.0462758	0.0513665	0.0462758			0.005	-0.241352	-0.171354	-0.191717	-0.148446	-0.130628			0.005	0.148091	0.074275	0.101001	0.0984561	0.0857292
	0.006	0.0590027	0.0730023	0.0793657	0.061548	0.0590027			0.006	0.0500939	0.0360943	0.0488212	0.0310035	0.0310035			0.006	-0.247716	-0.176445	-0.157355	-0.139537	-0.116628			0.006	0.131546	0.0793657	0.0959107	0.0984561	0.0895472
	0.007	0.0602754	0.0602754	0.0857292	0.0526392	0.0539119			0.007	0.0526392	0.0335489	0.0424577	0.0437304	0.0297308			0.007	-0.251534	-0.163718	-0.167536	-0.1459	-0.115356			0.007	0.130273	0.0857292	0.0933653	0.0920926	0.094638
	0.008	0.0462758	0.0704569	0.0819111	0.0526392	0.0590027			0.008	0.0424577	0.0399123	0.0450031	0.0399123	0.0386396			0.008	-0.237534	-0.172627	-0.166263	-0.135719	-0.128083			0.008	0.130273	0.0806384	0.103547	0.0844565	0.0971834
	0.009	0.0653661	0.0590027	0.0602754	0.05773	0.0500939			0.009	0.0475485	0.041185	0.0475485	0.0462758	0.0182766			0.009	-0.251534	-0.177718	-0.172627	-0.148446	-0.139537			0.009	0.146818	0.0844565	0.0984561	0.102274	0.0920926
	0.01	0.0640934	0.0730023	0.0819111	0.0513665	0.0539119			0.01	0.0513665	0.041185	0.0475485	0.0424577	0.0360943			0.01	-0.237534	-0.176445	-0.168809	-0.144628	-0.114083			0.01	0.140455	0.094638	0.12391	0.0908199	0.0933653
	0.011	0.0590027	0.074275	0.0730023	0.0488212	0.0513665			0.011	0.0348216	0.0386396	0.0424577	0.0475485	0.037367			0.011	-0.229898	-0.184081	-0.161173	-0.144628	-0.117901			0.011	0.154454	0.0933653	0.0933653	0.0933653	0.0933653
	0.012	0.0691842	0.0908199	0.0679115	0.05773	0.0488212			0.012	0.0539119	0.0284581	0.037367	0.0297308	0.0335489			0.012	-0.220989	-0.167536	-0.161173	-0.1459	-0.130628			0.012	0.160818	0.0870019	0.107365	0.0971834	0.103547
	0.013	0.0628207	0.074275	0.0691842	0.0450031	0.0513665			0.013	0.041185	0.0526392	0.0539119	0.0462758	0.0386396			0.013	-0.210808	-0.158627	-0.1599	-0.1459	-0.117901			0.013	0.158273	0.0755476	0.117546	0.104819	0.0920926
	0.014	0.061548	0.0704569	0.0717296	0.0590027	0.0628207			0.014	0.0513665	0.037367	0.0488212	0.0488212	0.0462758			0.014	-0.218444	-0.175172	-0.170081	-0.144628	-0.120447			0.014	0.182454	0.094638	0.0933653	0.0959107	0.0997288
	0.015	0.0590027	0.0755476	0.0691842	0.0602754	0.0462758			0.015	0.0513665	0.0462758	0.0360943	0.0450031	0.0310035			0.015	-0.214626	-0.177718	-0.157355	-0.138264	-0.117901			0.015	0.196453	0.0895472	0.0997288	0.0920926	0.0984561
	0.016	0.061548	0.0666388	0.0755476	0.0640934	0.0399123			0.016	0.0348216	0.041185	0.0386396	0.0450031	0.0233674			0.016	-0.227353	-0.182808	-0.161173	-0.147173	-0.125537			0.016	0.206635	0.0755476	0.094638	0.104819	0.0908199
	0.017	0.0513665	0.0730023	0.061548	0.0666388	0.0513665			0.017	0.0450031	0.0233674	0.037367	0.05773	0.0348216			0.017	-0.209535	-0.167536	-0.164991	-0.14081	-0.12681			0.017	0.226998	0.0806384	0.0984561	0.0768203	0.0971834
	0.018	0.0526392	0.0653661	0.0730023	0.0526392	0.0551846			0.018	0.0500939	0.0437304	0.0500939	0.0500939	0.0310035			0.018	-0.204444	-0.163718	-0.1459	-0.14081	-0.120447			0.018	0.207907	0.0984561	0.113728	0.104819	0.107365
	0.019	0.0513665	0.0755476	0.0793657	0.0500939	0.0564573			0.019	0.0310035	0.0437304	0.0450031	0.0437304	0.0360943			0.019	-0.220989	-0.175172	-0.186626	-0.136991	-0.11281			0.019	0.230816	0.0806384	0.0997288	0.0933653	0.0908199
	0.02	0.0462758	0.0730023	0.078093	0.0424577	0.0488212			0.02	0.0462758	0.041185	0.0450031	0.0386396	0.0233674			0.02	-0.21208	-0.162445	-0.154809	-0.119174	-0.133174			0.02	0.224452	0.0895472	0.103547	0.078093	0.094638
	0.021	0.0628207	0.078093	0.0653661	0.05773	0.0539119			0.021	0.05773	0.0386396	0.0462758	0.0500939	0.0450031			0.021	-0.214626	-0.172627	-0.167536	-0.153536	-0.0988109			0.021	0.212998	0.0870019	0.0971834	0.101001	0.0806384
	0.022	0.0437304	0.074275	0.0717296	0.0564573	0.05773			0.022	0.0488212	0.0386396	0.0526392	0.0399123	0.0335489			0.022	-0.201899	-0.171354	-0.170081	-0.129355	-0.129355			0.022	0.218089	0.0704569	0.104819	0.0831838	0.0933653
	0.023	0.0602754	0.0819111	0.0704569	0.0564573	0.0526392			0.023	0.0539119	0.0450031	0.0322762	0.041185	0.037367			0.023	-0.205717	-0.184081	-0.150991	-0.144628	-0.120447			0.023	0.211725	0.0908199	0.0997288	0.0959107	0.102274
	0.024	0.0513665	0.0730023	0.0755476	0.0513665	0.0488212			0.024	0.0386396	0.0437304	0.0590027	0.0424577	0.0360943			0.024	-0.201899	-0.171354	-0.147173	-0.135719	-0.119174			0.024	0.186272	0.0933653	0.106092	0.102274	0.106092
	0.025	0.0628207	0.0602754	0.0628207	0.0564573	0.0526392			0.025	0.0399123	0.0437304	0.0386396	0.0500939	0.0462758			0.025	-0.213353	-0.175172	-0.167536	-0.119174	-0.116628			0.025	0.179908	0.101001	0.120092	0.0959107	0.094638
	0.026	0.0653661	0.0640934	0.0666388	0.0602754	0.0500939			0.026	0.0526392	0.0322762	0.0424577	0.0488212	0.0360943			0.026	-0.205717	-0.175172	-0.152264	-0.14081	-0.11281			0.026	0.182454	0.0959107	0.0984561	0.0831838	0.094638
	0.027	0.0602754	0.0768203	0.0691842	0.0564573	0.0628207			0.027	0.0513665	0.0437304	0.041185	0.0488212	0.0437304			0.027	-0.199353	-0.156082	-0.164991	-0.133174	-0.12681			0.027	0.181181	0.0870019	0.108638	0.0895472	0.103547
	0.028	0.05773	0.0666388	0.0691842	0.0628207	0.0462758			0.028	0.0539119	0.0475485	0.0551846	0.0399123	0.0335489			0.028	-0.215898	-0.175172	-0.149718	-0.133174	-0.119174			0.028	0.174817	0.094638	0.101001	0.104819	0.0908199
	0.029	0.0628207	0.0653661	0.074275	0.0475485	0.0564573			0.029	0.0488212	0.0284581	0.037367	0.0424577	0.0233674			0.029	-0.213353	-0.176445	-0.167536	-0.134446	-0.133174			0.029	0.17609	0.078093	0.103547	0.0971834	0.0971834
	0.03	0.0564573	0.0768203	0.0768203	0.0539119	0.0640934			0.03	0.041185	0.0348216	0.05773	0.0475485	0.0335489			0.03	-0.199353	-0.181536	-0.166263	-0.139537	-0.128083			0.03	0.178636	0.0844565	0.0908199	0.0895472	0.0870019
	0.031	0.0640934	0.0755476	0.0831838	0.0488212	0.0488212			0.031	0.0462758	0.0475485	0.0424577	0.0475485	0.0602754			0.031	-0.204444	-0.1739	-0.1599	-0.14081	-0.11281			0.031	0.187544	0.0831838	0.113728	0.0819111	0.0806384
	0.032	0.0526392	0.0666388	0.0704569	0.0653661	0.0526392			0.032	0.0462758	0.0437304	0.0551846	0.0437304	0.0322762			0.032	-0.201899	-0.175172	-0.150991	-0.149718	-0.122992			0.032	0.197726	0.0793657	0.0971834	0.104819	0.0959107
	0.033	0.0590027	0.0768203	0.074275	0.0462758	0.0602754			0.033	0.0450031	0.0437304	0.0450031	0.0322762	0.0424577			0.033	-0.213353	-0.175172	-0.161173	-0.143355	-0.12681			0.033	0.183726	0.0768203	0.104819	0.0997288	0.101001
	0.034	0.0539119	0.0691842	0.0717296	0.0628207	0.0551846			0.034	0.0437304	0.0488212	0.0475485	0.0462758	0.0360943			0.034	-0.231171	-0.172627	-0.154809	-0.150991	-0.122992			0.034	0.196453	0.103547	0.0895472	0.0933653	0.0768203
	0.035	0.0564573	0.074275	0.0793657	0.0564573	0.0539119			0.035	0.0526392	0.05773	0.0348216	0.0462758	0.0182766			0.035	-0.213353	-0.171354	-0.170081	-0.124265	-0.116628			0.035	0.205362	0.0755476	0.115001	0.106092	0.0997288
	0.036	0.0640934	0.074275	0.0679115	0.05773	0.0628207			0.036	0.0462758	0.0310035	0.0322762	0.037367	0.0246401			0.036	-0.205717	-0.167536	-0.1459	-0.128083	-0.120447			0.036	0.195181	0.0870019	0.0984561	0.0882745	0.0755476
	0.037	0.0640934	0.0717296	0.0679115	0.0640934	0.0526392			0.037	0.0450031	0.0424577	0.0500939	0.041185	0.0424577			0.037	-0.208262	-0.154809	-0.152264	-0.129355	-0.134446			0.037	0.188817	0.0819111	0.0933653	0.0908199	0.0997288
	0.038	0.0564573	0.0844565	0.0628207	0.0590027	0.0564573			0.038	0.0424577	0.020822	0.0322762	0.0424577	0.0322762			0.038	-0.227353	-0.175172	-0.167536	-0.130628	-0.130628			0.038	0.197726	0.0831838	0.0920926	0.0971834	0.115001
	0.039	0.061548	0.0704569	0.061548	0.0628207	0.0475485			0.039	0.0526392	0.037367	0.0551846	0.0437304	0.0360943			0.039	-0.205717	-0.177718	-0.148446	-0.122992	-0.114083			0.039	0.206635	0.0844565	0.094638	0.0933653	0.101001
	0.04	0.0602754	0.0717296	0.0730023	0.0500939	0.0590027			0.04	0.0564573	0.0399123	0.0386396	0.0475485	0.0335489			0.04	-0.195535	-0.170081	-0.167536	-0.117901	-0.121719			0.04	0.193908	0.0870019	0.0984561	0.0959107	0.0959107
	0.041	0.0513665	0.0717296	0.0806384	0.0717296	0.0462758			0.041	0.0602754	0.0335489	0.0399123	0.0348216	0.0335489			0.041	-0.215898	-0.181536	-0.156082	-0.138264	-0.108992			0.041	0.186272	0.0908199	0.108638	0.0959107	0.0819111
	0.042	0.0653661	0.0717296	0.0755476	0.0475485	0.05773			0.042	0.041185	0.0297308	0.0437304	0.0335489	0.0233674			0.042	-0.201899	-0.17899	-0.158627	-0.135719	-0.128083			0.042	0.170999	0.0793657	0.101001	0.108638	0.0844565
	0.043	0.05773	0.074275	0.0628207	0.0526392	0.0602754			0.043	0.0475485	0.0386396	0.0513665	0.037367	0.0399123			0.043	-0.220989	-0.171354	-0.149718	-0.128083	-0.119174			0.043	0.187544	0.078093	0.108638	0.0984561	0.0908199
	0.044	0.0564573	0.0819111	0.0679115	0.0679115	0.0500939			0.044	0.0462758	0.0335489	0.041185	0.0513665	0.0475485			0.044	-0.205717	-0.166263	-0.158627	-0.114083	-0.130628			0.044	0.179908	0.0895472	0.108638	0.0971834	0.0870019
	0.045	0.0551846	0.0628207	0.0730023	0.0551846	0.0450031			0.045	0.0488212	0.0539119	0.0437304	0.0424577	0.0284581			0.045	-0.214626	-0.17899	-0.1599	-0.130628	-0.121719			0.045	0.188817	0.0997288	0.103547	0.0908199	0.0984561
	0.046	0.0640934	0.0691842	0.0755476	0.0539119	0.0475485			0.046	0.0437304	0.0360943	0.0500939	0.0462758	0.0284581			0.046	-0.209535	-0.1599	-0.158627	-0.144628	-0.119174			0.046	0.187544	0.0895472	0.107365	0.0870019	0.0933653
	0.047	0.0551846	0.0691842	0.0691842	0.061548	0.0475485			0.047	0.0488212	0.0233674	0.0462758	0.0462758	0.0462758			0.047	-0.218444	-0.177718	-0.177718	-0.108992	-0.0988109			0.047	0.182454	0.094638	0.0882745	0.0959107	0.104819
	0.048	0.0590027	0.0691842	0.078093	0.0526392	0.05773			0.048	0.0399123	0.0386396	0.0640934	0.0450031	0.0424577			0.048	-0.206989	-0.185354	-0.143355	-0.124265	-0.124265			0.048	0.163363	0.0920926	0.0908199	0.0959107	0.094638
	0.049	0.0488212	0.0590027	0.0628207	0.0462758	0.0526392			0.049	0.0386396	0.0551846	0.0475485	0.0335489	0.0284581			0.049	-0.204444	-0.157355	-0.176445	-0.129355	-0.119174			0.049	0.169727	0.0819111	0.10991	0.0870019	0.0997288
	0.05	0.0590027	0.0806384	0.0717296	0.0628207	0.0513665			0.05	0.0488212	0.0450031	0.0335489	0.0424577	0.0310035			0.05	-0.199353	-0.177718	-0.150991	-0.121719	-0.128083			0.05	0.169727	0.0882745	0.102274	0.0806384	0.0882745
	0.051	0.0602754	0.0755476	0.0691842	0.05773	0.0513665			0.051	0.0462758	0.0488212	0.0539119	0.0399123	0.0322762			0.051	-0.200626	-0.168809	-0.164991	-0.121719	-0.130628			0.051	0.163363	0.0793657	0.0984561	0.101001	0.0806384
	0.052	0.0475485	0.0666388	0.074275	0.0526392	0.0551846			0.052	0.0399123	0.037367	0.0500939	0.0348216	0.0348216			0.052	-0.199353	-0.162445	-0.154809	-0.119174	-0.128083			0.052	0.172272	0.0806384	0.0959107	0.0920926	0.094638
	0.053	0.0526392	0.0730023	0.0882745	0.0526392	0.0590027			0.053	0.0424577	0.0475485	0.0475485	0.0424577	0.0246401			0.053	-0.215898	-0.164991	-0.1599	-0.11281	-0.12681			0.053	0.168454	0.0882745	0.104819	0.0870019	0.0844565
	0.054	0.0666388	0.0717296	0.0653661	0.0424577	0.0488212			0.054	0.0399123	0.0310035	0.041185	0.0360943	0.0284581			0.054	-0.210808	-0.168809	-0.164991	-0.10772	-0.10772			0.054	0.165909	0.0870019	0.108638	0.108638	0.108638
	0.055	0.0551846	0.0793657	0.0730023	0.0500939	0.0551846			0.055	0.041185	0.0462758	0.0450031	0.0526392	0.0437304			0.055	-0.205717	-0.175172	-0.163718	-0.100084	-0.111538			0.055	0.159545	0.0908199	0.104819	0.0908199	0.102274
	0.056	0.0475485	0.0755476	0.0653661	0.0526392	0.0590027			0.056	0.0500939	0.0259127	0.037367	0.0437304	0.0322762			0.056	-0.209535	-0.170081	-0.150991	-0.117901	-0.116628			0.056	0.165909	0.0933653	0.0984561	0.094638	0.0959107
	0.057	0.0666388	0.0806384	0.0704569	0.0526392	0.0500939			0.057	0.0526392	0.037367	0.037367	0.0488212	0.0488212			0.057	-0.215898	-0.162445	-0.154809	-0.120447	-0.136991			0.057	0.160818	0.0920926	0.104819	0.0895472	0.0730023
	0.058	0.0628207	0.0730023	0.0691842	0.0640934	0.05773			0.058	0.0488212	0.0348216	0.0386396	0.0450031	0.0386396			0.058	-0.198081	-0.171354	-0.164991	-0.119174	-0.124265			0.058	0.165909	0.0857292	0.0920926	0.094638	0.102274
	0.059	0.0640934	0.0628207	0.0640934	0.0590027	0.0564573			0.059	0.0437304	0.041185	0.0526392	0.0284581	0.0437304			0.059	-0.194263	-0.181536	-0.158627	-0.111538	-0.117901			0.059	0.165909	0.0793657	0.10991	0.0882745	0.0971834
	0.06	0.0628207	0.074275	0.0691842	0.0590027	0.0590027			0.06	0.0437304	0.0526392	0.0386396	0.0462758	0.0284581			0.06	-0.205717	-0.164991	-0.170081	-0.108992	-0.120447			0.06	0.141728	0.0920926	0.0844565	0.0933653	0.0895472
	0.061	0.0475485	0.061548	0.0755476	0.061548	0.0488212			0.061	0.0500939	0.0386396	0.0475485	0.0437304	0.0360943			0.061	-0.204444	-0.163718	-0.154809	-0.114083	-0.11281			0.061	0.167181	0.0997288	0.108638	0.104819	0.0882745
	0.062	0.0539119	0.0806384	0.0653661	0.0513665	0.0590027			0.062	0.0348216	0.0488212	0.0475485	0.0360943	0.0335489			0.062	-0.215898	-0.175172	-0.156082	-0.111538	-0.122992			0.062	0.173545	0.0895472	0.0920926	0.0984561	0.094638
	0.063	0.0590027	0.061548	0.0844565	0.0666388	0.0564573			0.063	0.0386396	0.037367	0.0488212	0.0462758	0.0386396			0.063	-0.204444	-0.164991	-0.175172	-0.120447	-0.120447			0.063	0.160818	0.0844565	0.101001	0.0959107	0.0971834
	0.064	0.0590027	0.0793657	0.0679115	0.0526392	0.0513665			0.064	0.0539119	0.0271854	0.0475485	0.0437304	0.0335489			0.064	-0.21208	-0.1599	-0.163718	-0.110265	-0.129355			0.064	0.168454	0.0819111	0.103547	0.0857292	0.0933653
	0.065	0.0551846	0.0793657	0.0730023	0.0475485	0.0437304			0.065	0.0488212	0.0399123	0.0462758	0.0539119	0.0310035			0.065	-0.195535	-0.166263	-0.163718	-0.117901	-0.108992			0.065	0.148091	0.074275	0.113728	0.107365	0.0959107
	0.066	0.0450031	0.0717296	0.0730023	0.0539119	0.0539119			0.066	0.0475485	0.0271854	0.041185	0.0437304	0.0348216			0.066	-0.204444	-0.177718	-0.142082	-0.103902	-0.128083			0.066	0.160818	0.104819	0.120092	0.0997288	0.0857292
	0.067	0.0640934	0.0730023	0.0679115	0.061548	0.05773			0.067	0.0424577	0.0399123	0.0539119	0.0335489	0.0297308			0.067	-0.218444	-0.176445	-0.154809	-0.117901	-0.106447			0.067	0.158273	0.074275	0.0895472	0.0844565	0.0933653
	0.068	0.0500939	0.0590027	0.0628207	0.0551846	0.0526392			0.068	0.0488212	0.0259127	0.0462758	0.0488212	0.0335489			0.068	-0.205717	-0.162445	-0.157355	-0.0937201	-0.124265			0.068	0.155727	0.0831838	0.101001	0.074275	0.0908199
	0.069	0.061548	0.0539119	0.074275	0.05773	0.061548			0.069	0.0437304	0.0475485	0.0500939	0.0399123	0.041185			0.069	-0.208262	-0.161173	-0.154809	-0.111538	-0.114083			0.069	0.164636	0.0971834	0.103547	0.0984561	0.0971834
	0.07	0.0628207	0.0704569	0.0679115	0.0640934	0.0437304			0.07	0.0437304	0.0348216	0.0564573	0.0462758	0.037367			0.07	-0.204444	-0.164991	-0.154809	-0.119174	-0.121719			0.07	0.165909	0.0882745	0.0933653	0.111183	0.0984561
	0.071	0.0590027	0.0831838	0.0602754	0.0513665	0.041185			0.071	0.0462758	0.0386396	0.0399123	0.041185	0.0360943			0.071	-0.199353	-0.171354	-0.168809	-0.100084	-0.124265			0.071	0.163363	0.0882745	0.106092	0.0933653	0.0857292
	0.072	0.05773	0.0666388	0.0640934	0.0513665	0.0602754			0.072	0.0500939	0.0399123	0.0360943	0.0526392	0.0399123			0.072	-0.208262	-0.176445	-0.164991	-0.100084	-0.105174			0.072	0.163363	0.0819111	0.0971834	0.0959107	0.0895472
	0.073	0.0602754	0.0819111	0.078093	0.0564573	0.0602754			0.073	0.0526392	0.037367	0.0475485	0.0386396	0.0271854			0.073	-0.214626	-0.162445	-0.158627	-0.119174	-0.12681			0.073	0.151909	0.0882745	0.0882745	0.0882745	0.0920926
	0.074	0.0539119	0.0679115	0.0666388	0.0564573	0.0602754			0.074	0.0437304	0.0259127	0.0488212	0.0602754	0.0182766			0.074	-0.205717	-0.177718	-0.157355	-0.124265	-0.111538			0.074	0.148091	0.0806384	0.0920926	0.0933653	0.0933653
	0.075	0.0488212	0.0704569	0.0717296	0.0526392	0.0590027			0.075	0.037367	0.0360943	0.0424577	0.0450031	0.0437304			0.075	-0.209535	-0.180263	-0.1459	-0.122992	-0.122992			0.075	0.153182	0.0793657	0.107365	0.0870019	0.0704569
	0.076	0.0488212	0.0793657	0.0730023	0.0475485	0.05773			0.076	0.0475485	0.0551846	0.0437304	0.0450031	0.0386396			0.076	-0.214626	-0.175172	-0.167536	-0.115356	-0.120447			0.076	0.159545	0.0793657	0.0997288	0.0933653	0.0971834
	0.077	0.05773	0.078093	0.078093	0.0526392	0.0640934			0.077	0.037367	0.0399123	0.0424577	0.0488212	0.0386396			0.077	-0.203171	-0.166263	-0.153536	-0.10772	-0.108992			0.077	0.144273	0.0882745	0.0933653	0.104819	0.0882745
	0.078	0.0539119	0.0691842	0.0793657	0.0564573	0.0500939			0.078	0.0500939	0.0437304	0.0526392	0.0526392	0.0335489			0.078	-0.203171	-0.162445	-0.1599	-0.110265	-0.14081			0.078	0.149364	0.0895472	0.103547	0.0844565	0.0882745
	0.079	0.0500939	0.0730023	0.0704569	0.0488212	0.0526392			0.079	0.0500939	0.0271854	0.0488212	0.041185	0.0284581			0.079	-0.208262	-0.168809	-0.154809	-0.120447	-0.120447			0.079	0.141728	0.0831838	0.104819	0.0831838	0.0920926
	0.08	0.0564573	0.0666388	0.074275	0.0475485	0.061548			0.08	0.0437304	0.037367	0.0475485	0.037367	0.0297308			0.08	-0.187899	-0.153536	-0.180263	-0.115356	-0.108992			0.08	0.157	0.0908199	0.0997288	0.0997288	0.115001
	0.081	0.0717296	0.078093	0.0768203	0.0526392	0.0450031			0.081	0.0386396	0.0399123	0.0475485	0.0488212	0.0297308			0.081	-0.199353	-0.171354	-0.168809	-0.11281	-0.111538			0.081	0.170999	0.0895472	0.094638	0.0806384	0.0895472
	0.082	0.0513665	0.0640934	0.0730023	0.0590027	0.0564573			0.082	0.0564573	0.0475485	0.0488212	0.0539119	0.0335489			0.082	-0.209535	-0.172627	-0.144628	-0.120447	-0.122992			0.082	0.160818	0.061548	0.0895472	0.0984561	0.0959107
	0.083	0.0628207	0.0755476	0.0640934	0.0513665	0.0462758			0.083	0.0424577	0.037367	0.0424577	0.0360943	0.0310035			0.083	-0.218444	-0.195535	-0.152264	-0.119174	-0.114083			0.083	0.153182	0.0831838	0.0857292	0.101001	0.101001
	0.084	0.0500939	0.0819111	0.0666388	0.0551846	0.0539119			0.084	0.0590027	0.0462758	0.0475485	0.0322762	0.037367			0.084	-0.205717	-0.166263	-0.157355	-0.114083	-0.125537			0.084	0.154454	0.0920926	0.108638	0.094638	0.0844565
	0.085	0.0640934	0.0666388	0.05773	0.061548	0.0475485			0.085	0.0437304	0.020822	0.0488212	0.0437304	0.0335489			0.085	-0.210808	-0.158627	-0.161173	-0.119174	-0.108992			0.085	0.132819	0.0793657	0.111183	0.0882745	0.0806384
	0.086	0.0628207	0.0640934	0.0717296	0.0551846	0.0590027			0.086	0.0475485	0.0335489	0.0399123	0.0360943	0.0348216			0.086	-0.215898	-0.185354	-0.153536	-0.122992	-0.11281			0.086	0.169727	0.0844565	0.0908199	0.0984561	0.103547
	0.087	0.0500939	0.074275	0.0691842	0.0539119	0.0590027			0.087	0.0450031	0.0450031	0.0539119	0.0424577	0.0348216			0.087	-0.198081	-0.1599	-0.156082	-0.124265	-0.116628			0.087	0.168454	0.0730023	0.094638	0.102274	0.0870019
	0.088	0.0513665	0.0717296	0.078093	0.0551846	0.0590027			0.088	0.037367	0.0475485	0.037367	0.0360943	0.0360943			0.088	-0.198081	-0.164991	-0.161173	-0.120447	-0.111538			0.088	0.141728	0.0933653	0.0933653	0.0819111	0.0908199
	0.089	0.0590027	0.0640934	0.0730023	0.0475485	0.0437304			0.089	0.0437304	0.0195493	0.0386396	0.0450031	0.0284581			0.089	-0.204444	-0.166263	-0.162445	-0.11281	-0.115356			0.089	0.153182	0.0793657	0.0857292	0.0933653	0.0933653
	0.09	0.0475485	0.0730023	0.0793657	0.05773	0.0602754			0.09	0.0399123	0.0475485	0.0475485	0.041185	0.0386396			0.09	-0.203171	-0.1599	-0.152264	-0.119174	-0.11281			0.09	0.154454	0.0882745	0.0984561	0.0870019	0.101001
	0.091	0.0513665	0.0666388	0.0717296	0.0539119	0.0539119			0.091	0.0399123	0.0348216	0.0500939	0.0335489	0.0297308			0.091	-0.204444	-0.164991	-0.135719	-0.125537	-0.114083			0.091	0.168454	0.0844565	0.107365	0.0908199	0.0971834
	0.092	0.05773	0.0628207	0.0730023	0.0590027	0.0513665			0.092	0.0500939	0.0360943	0.037367	0.0539119	0.0322762			0.092	-0.200626	-0.177718	-0.157355	-0.130628	-0.139537			0.092	0.160818	0.074275	0.0908199	0.0997288	0.112456
	0.093	0.0551846	0.0730023	0.05773	0.0539119	0.0564573			0.093	0.0348216	0.0399123	0.0360943	0.0437304	0.0220947			0.093	-0.214626	-0.171354	-0.162445	-0.115356	-0.116628			0.093	0.17609	0.0819111	0.0984561	0.112456	0.0895472
	0.094	0.0488212	0.0793657	0.0730023	0.0653661	0.0475485			0.094	0.0526392	0.0348216	0.0462758	0.037367	0.0399123			0.094	-0.214626	-0.164991	-0.156082	-0.121719	-0.106447			0.094	0.165909	0.094638	0.104819	0.0959107	0.101001
	0.095	0.0551846	0.0704569	0.0679115	0.0475485	0.0564573			0.095	0.0475485	0.0271854	0.0526392	0.0322762	0.0335489			0.095	-0.205717	-0.1739	-0.152264	-0.121719	-0.119174			0.095	0.157	0.0793657	0.103547	0.0831838	0.0819111
	0.096	0.05773	0.0653661	0.0666388	0.061548	0.0450031			0.096	0.0437304	0.0386396	0.0437304	0.0462758	0.0437304			0.096	-0.21208	-0.1599	-0.170081	-0.115356	-0.102629			0.096	0.160818	0.0844565	0.0984561	0.0882745	0.0997288
	0.097	0.0628207	0.0640934	0.0730023	0.05773	0.0526392			0.097	0.0475485	0.0310035	0.041185	0.0526392	0.0284581			0.097	-0.201899	-0.1599	-0.157355	-0.119174	-0.111538			0.097	0.17609	0.0793657	0.0882745	0.107365	0.0806384
	0.098	0.0539119	0.0730023	0.0666388	0.0488212	0.0488212			0.098	0.0399123	0.0462758	0.0399123	0.0488212	0.0271854			0.098	-0.196808	-0.170081	-0.163718	-0.138264	-0.114083			0.098	0.172272	0.078093	0.115001	0.0933653	0.0806384
	0.099	0.0590027	0.0691842	0.0704569	0.0628207	0.0500939			0.099	0.0551846	0.0424577	0.0450031	0.041185	0.0233674			0.099	-0.208262	-0.167536	-0.152264	-0.125537	-0.121719			0.099	0.195181	0.0806384	0.0882745	0.0971834	0.102274
	0.1	0.0500939	0.0628207	0.0704569	0.0590027	0.0450031			0.1	0.0386396	0.0348216	0.05773	0.0360943	0.037367			0.1	-0.195535	-0.175172	-0.164991	-0.125537	-0.129355			0.1	0.19009	0.0920926	0.103547	0.101001	0.0844565
	0.101	0.0462758	0.0793657	0.0691842	0.0488212	0.0526392			0.101	0.0424577	0.0399123	0.0322762	0.0335489	0.0437304			0.101	-0.208262	-0.170081	-0.164991	-0.136991	-0.128083			0.101	0.186272	0.0920926	0.0831838	0.094638	0.0984561
	0.102	0.0539119	0.0730023	0.0768203	0.0488212	0.0602754			0.102	0.0450031	0.0386396	0.0488212	0.0386396	0.041185			0.102	-0.205717	-0.181536	-0.154809	-0.138264	-0.116628			0.102	0.201544	0.0768203	0.0908199	0.106092	0.0933653
	0.103	0.0691842	0.0704569	0.0704569	0.0564573	0.0475485			0.103	0.0437304	0.0437304	0.0488212	0.041185	0.0284581			0.103	-0.21208	-0.164991	-0.163718	-0.115356	-0.115356			0.103	0.183726	0.0895472	0.0971834	0.101001	0.0908199
	0.104	0.0526392	0.0640934	0.0704569	0.0526392	0.0488212			0.104	0.0450031	0.0437304	0.037367	0.0462758	0.0271854			0.104	-0.209535	-0.150991	-0.1459	-0.138264	-0.117901			0.104	0.196453	0.0908199	0.10991	0.0882745	0.094638
	0.105	0.0526392	0.0640934	0.0730023	0.0628207	0.0500939			0.105	0.0386396	0.041185	0.037367	0.0462758	0.0513665			0.105	-0.195535	-0.168809	-0.150991	-0.153536	-0.115356			0.105	0.186272	0.0984561	0.107365	0.0984561	0.108638
	0.106	0.0539119	0.0691842	0.0666388	0.0526392	0.0526392			0.106	0.0488212	0.037367	0.0310035	0.041185	0.0360943			0.106	-0.196808	-0.175172	-0.152264	-0.12681	-0.122992			0.106	0.193908	0.0959107	0.117546	0.078093	0.0755476
	0.107	0.0640934	0.0679115	0.0691842	0.0500939	0.0564573			0.107	0.0513665	0.0271854	0.0526392	0.0513665	0.0271854			0.107	-0.203171	-0.166263	-0.149718	-0.133174	-0.119174			0.107	0.198998	0.0819111	0.102274	0.0920926	0.0882745
	0.108	0.0590027	0.074275	0.0831838	0.0590027	0.0526392			0.108	0.0424577	0.0348216	0.0335489	0.0462758	0.0284581			0.108	-0.204444	-0.152264	-0.166263	-0.125537	-0.121719			0.108	0.195181	0.0882745	0.107365	0.0870019	0.0882745
	0.109	0.0539119	0.0730023	0.0691842	0.0513665	0.0450031			0.109	0.0475485	0.0360943	0.0462758	0.0437304	0.0271854			0.109	-0.213353	-0.162445	-0.150991	-0.131901	-0.114083			0.109	0.200271	0.0959107	0.0971834	0.0984561	0.101001
	0.11	0.0539119	0.0704569	0.0666388	0.0691842	0.0475485			0.11	0.0360943	0.0322762	0.0360943	0.0360943	0.0310035			0.11	-0.200626	-0.172627	-0.1459	-0.134446	-0.115356			0.11	0.211725	0.074275	0.102274	0.0844565	0.0984561
	0.111	0.041185	0.0704569	0.0730023	0.0500939	0.05773			0.111	0.0450031	0.0399123	0.0602754	0.0500939	0.0386396			0.111	-0.199353	-0.168809	-0.157355	-0.130628	-0.105174			0.111	0.214271	0.0882745	0.0870019	0.0895472	0.0971834
	0.112	0.0602754	0.05773	0.0653661	0.0539119	0.0602754			0.112	0.0360943	0.041185	0.0348216	0.0310035	0.0271854			0.112	-0.200626	-0.180263	-0.154809	-0.122992	-0.115356			0.112	0.201544	0.0870019	0.0831838	0.0870019	0.0831838
	0.113	0.0450031	0.0679115	0.0590027	0.0526392	0.05773			0.113	0.0475485	0.0399123	0.0437304	0.0399123	0.0360943			0.113	-0.194263	-0.175172	-0.156082	-0.114083	-0.12681			0.113	0.206635	0.0870019	0.0920926	0.108638	0.0806384
	0.114	0.0564573	0.0755476	0.0653661	0.0513665	0.0551846			0.114	0.0500939	0.0310035	0.0500939	0.0462758	0.0284581			0.114	-0.204444	-0.157355	-0.161173	-0.130628	-0.128083			0.114	0.212998	0.0870019	0.0908199	0.0844565	0.094638
	0.115	0.0526392	0.0679115	0.0640934	0.0628207	0.0628207			0.115	0.0424577	0.0360943	0.0475485	0.0475485	0.0335489			0.115	-0.201899	-0.164991	-0.1599	-0.130628	-0.110265			0.115	0.186272	0.10991	0.0908199	0.104819	0.0895472
	0.116	0.0628207	0.0628207	0.0653661	0.0437304	0.0551846			0.116	0.0526392	0.0297308	0.0450031	0.037367	0.0335489			0.116	-0.195535	-0.1599	-0.142082	-0.129355	-0.110265			0.116	0.215543	0.0870019	0.0920926	0.0895472	0.0984561
	0.117	0.0628207	0.0590027	0.0730023	0.0640934	0.0564573			0.117	0.0386396	0.0462758	0.0450031	0.0475485	0.037367			0.117	-0.199353	-0.154809	-0.154809	-0.131901	-0.11281			0.117	0.196453	0.0895472	0.101001	0.0857292	0.0895472
	0.118	0.0526392	0.0628207	0.0704569	0.0539119	0.0590027			0.118	0.0437304	0.0399123	0.0335489	0.0424577	0.0322762			0.118	-0.198081	-0.171354	-0.156082	-0.125537	-0.12681			0.118	0.192635	0.0844565	0.108638	0.094638	0.0997288
	0.119	0.0526392	0.0768203	0.0755476	0.0462758	0.0590027			0.119	0.0386396	0.037367	0.0488212	0.0399123	0.041185			0.119	-0.218444	-0.177718	-0.149718	-0.124265	-0.116628			0.119	0.196453	0.0882745	0.0984561	0.101001	0.0806384
	0.12	0.0564573	0.0704569	0.0679115	0.0666388	0.0462758			0.12	0.0475485	0.0462758	0.041185	0.0526392	0.0386396			0.12	-0.222262	-0.157355	-0.163718	-0.12681	-0.120447			0.12	0.186272	0.0793657	0.0997288	0.0997288	0.0971834
	0.121	0.0564573	0.0704569	0.0831838	0.05773	0.0526392			0.121	0.0513665	0.0399123	0.0399123	0.0360943	0.0437304			0.121	-0.198081	-0.168809	-0.166263	-0.119174	-0.11281			0.121	0.19009	0.0895472	0.108638	0.0997288	0.0971834
	0.122	0.0590027	0.0730023	0.0640934	0.0539119	0.0513665			0.122	0.0437304	0.0335489	0.0386396	0.0450031	0.0322762			0.122	-0.201899	-0.164991	-0.148446	-0.150991	-0.11281			0.122	0.204089	0.0933653	0.0870019	0.0870019	0.0920926
	0.123	0.0526392	0.0691842	0.0704569	0.0539119	0.0462758			0.123	0.0450031	0.0322762	0.0424577	0.0539119	0.0297308			0.123	-0.201899	-0.164991	-0.148446	-0.134446	-0.10772			0.123	0.195181	0.078093	0.107365	0.0997288	0.0806384
	0.124	0.0424577	0.0679115	0.061548	0.0539119	0.0526392			0.124	0.0386396	0.0386396	0.041185	0.0322762	0.0386396			0.124	-0.21208	-0.176445	-0.154809	-0.120447	-0.11281			0.124	0.187544	0.0920926	0.0870019	0.101001	0.0768203
	0.125	0.0628207	0.0564573	0.0564573	0.0450031	0.0462758			0.125	0.0462758	0.0284581	0.0424577	0.0437304	0.0360943			0.125	-0.21208	-0.177718	-0.150991	-0.143355	-0.131901			0.125	0.170999	0.0870019	0.094638	0.101001	0.0908199
	0.126	0.0500939	0.0679115	0.061548	0.05773	0.0526392			0.126	0.0360943	0.0386396	0.0424577	0.0475485	0.0271854			0.126	-0.204444	-0.149718	-0.170081	-0.124265	-0.114083			0.126	0.173545	0.0882745	0.103547	0.0870019	0.0908199
	0.127	0.0450031	0.0806384	0.0704569	0.0590027	0.0450031			0.127	0.041185	0.0335489	0.0450031	0.037367	0.0386396			0.127	-0.218444	-0.167536	-0.158627	-0.128083	-0.116628			0.127	0.191362	0.0920926	0.0933653	0.0971834	0.0984561
	0.128	0.0551846	0.0590027	0.0666388	0.0450031	0.0500939			0.128	0.0399123	0.0462758	0.0513665	0.0360943	0.0335489			0.128	-0.195535	-0.1599	-0.162445	-0.138264	-0.11281			0.128	0.181181	0.0908199	0.0997288	0.0768203	0.0882745
	0.129	0.0590027	0.0831838	0.0730023	0.0488212	0.0513665			0.129	0.0462758	0.0462758	0.0602754	0.041185	0.0297308			0.129	-0.191717	-0.167536	-0.150991	-0.131901	-0.10772			0.129	0.168454	0.0895472	0.0971834	0.0882745	0.0997288
	0.13	0.0526392	0.0653661	0.061548	0.0628207	0.0462758			0.13	0.0539119	0.0386396	0.037367	0.0437304	0.0424577			0.13	-0.22608	-0.1599	-0.147173	-0.130628	-0.116628			0.13	0.163363	0.0819111	0.0971834	0.113728	0.0971834
	0.131	0.0488212	0.0704569	0.0819111	0.0564573	0.0360943			0.131	0.0335489	0.0386396	0.0386396	0.0399123	0.037367			0.131	-0.200626	-0.181536	-0.161173	-0.134446	-0.116628			0.131	0.178636	0.0882745	0.0984561	0.0831838	0.0933653
	0.132	0.05773	0.0755476	0.0704569	0.0590027	0.0551846			0.132	0.0475485	0.041185	0.0424577	0.0360943	0.0271854			0.132	-0.199353	-0.1739	-0.162445	-0.122992	-0.116628			0.132	0.167181	0.0793657	0.0959107	0.0870019	0.104819
	0.133	0.0666388	0.0691842	0.0628207	0.0590027	0.0450031			0.133	0.0539119	0.0335489	0.0424577	0.0500939	0.0335489			0.133	-0.205717	-0.168809	-0.154809	-0.130628	-0.131901			0.133	0.164636	0.0831838	0.0920926	0.0831838	0.101001
	0.134	0.0437304	0.0666388	0.0691842	0.037367	0.0450031			0.134	0.0526392	0.0462758	0.0386396	0.0399123	0.0399123			0.134	-0.198081	-0.166263	-0.156082	-0.124265	-0.119174			0.134	0.163363	0.10991	0.101001	0.0870019	0.0819111
	0.135	0.0526392	0.0666388	0.0666388	0.0437304	0.0551846			0.135	0.041185	0.0386396	0.0386396	0.0360943	0.0182766			0.135	-0.205717	-0.181536	-0.157355	-0.124265	-0.129355			0.135	0.159545	0.0831838	0.104819	0.0819111	0.0959107
	0.136	0.0539119	0.0691842	0.0691842	0.0564573	0.0526392			0.136	0.037367	0.0513665	0.0475485	0.0360943	0.0348216			0.136	-0.195535	-0.1599	-0.1599	-0.124265	-0.101356			0.136	0.155727	0.0793657	0.0844565	0.0882745	0.0870019
	0.137	0.05773	0.0704569	0.0640934	0.041185	0.0539119			0.137	0.0488212	0.0348216	0.0450031	0.0437304	0.0271854			0.137	-0.194263	-0.164991	-0.1459	-0.129355	-0.100084			0.137	0.186272	0.0882745	0.0895472	0.0908199	0.0895472
	0.138	0.0590027	0.061548	0.0640934	0.0590027	0.0640934			0.138	0.0513665	0.0475485	0.0602754	0.0348216	0.0310035			0.138	-0.205717	-0.152264	-0.149718	-0.129355	-0.120447			0.138	0.160818	0.0806384	0.0882745	0.0908199	0.094638
	0.139	0.0526392	0.0628207	0.0602754	0.0564573	0.0386396			0.139	0.041185	0.0348216	0.037367	0.0399123	0.0297308			0.139	-0.191717	-0.1599	-0.147173	-0.131901	-0.115356			0.139	0.160818	0.0882745	0.094638	0.094638	0.0819111
	0.14	0.0526392	0.0806384	0.0691842	0.0513665	0.0526392			0.14	0.0386396	0.0437304	0.0539119	0.0310035	0.0386396			0.14	-0.214626	-0.162445	-0.136991	-0.116628	-0.121719			0.14	0.169727	0.103547	0.0895472	0.0971834	0.0870019
	0.141	0.0539119	0.0755476	0.0793657	0.0399123	0.0539119			0.141	0.0450031	0.037367	0.0450031	0.0424577	0.0399123			0.141	-0.196808	-0.177718	-0.153536	-0.119174	-0.115356			0.141	0.151909	0.0793657	0.102274	0.0984561	0.0844565
	0.142	0.0513665	0.0590027	0.0717296	0.0539119	0.05773			0.142	0.037367	0.0360943	0.0386396	0.0437304	0.0386396			0.142	-0.205717	-0.166263	-0.162445	-0.144628	-0.111538			0.142	0.160818	0.0768203	0.102274	0.0895472	0.0933653
	0.143	0.0551846	0.074275	0.0602754	0.0462758	0.0437304			0.143	0.0348216	0.0310035	0.0450031	0.0360943	0.0360943			0.143	-0.191717	-0.162445	-0.150991	-0.14081	-0.116628			0.143	0.160818	0.0933653	0.0908199	0.0971834	0.0984561
	0.144	0.0475485	0.0730023	0.061548	0.0475485	0.0462758			0.144	0.0424577	0.0360943	0.0488212	0.0526392	0.0335489			0.144	-0.201899	-0.154809	-0.158627	-0.138264	-0.121719			0.144	0.153182	0.0870019	0.0959107	0.101001	0.0844565
	0.145	0.0564573	0.0755476	0.0704569	0.0513665	0.0653661			0.145	0.0564573	0.0437304	0.0500939	0.0322762	0.0386396			0.145	-0.209535	-0.171354	-0.138264	-0.124265	-0.0988109			0.145	0.151909	0.0844565	0.0895472	0.103547	0.094638
	0.146	0.0602754	0.0704569	0.0691842	0.0551846	0.0462758			0.146	0.0335489	0.0322762	0.0424577	0.0488212	0.0348216			0.146	-0.196808	-0.172627	-0.135719	-0.130628	-0.115356			0.146	0.150636	0.0768203	0.106092	0.0819111	0.0882745
	0.147	0.0564573	0.0691842	0.0679115	0.0590027	0.061548			0.147	0.0488212	0.0271854	0.0335489	0.0462758	0.0399123			0.147	-0.200626	-0.171354	-0.162445	-0.134446	-0.110265			0.147	0.149364	0.0704569	0.0882745	0.0819111	0.0831838
	0.148	0.0590027	0.0590027	0.0806384	0.0526392	0.0437304			0.148	0.0424577	0.0539119	0.0488212	0.037367	0.0360943			0.148	-0.194263	-0.161173	-0.147173	-0.130628	-0.116628			0.148	0.168454	0.0717296	0.0793657	0.0870019	0.094638
	0.149	0.0539119	0.0679115	0.0666388	0.0539119	0.0539119			0.149	0.0310035	0.0335489	0.0475485	0.0348216	0.0259127			0.149	-0.210808	-0.157355	-0.142082	-0.131901	-0.100084			0.149	0.155727	0.0895472	0.102274	0.0908199	0.0959107
	0.15	0.0602754	0.074275	0.0704569	0.0500939	0.0500939			0.15	0.05773	0.0386396	0.0284581	0.0488212	0.0297308			0.15	-0.181536	-0.156082	-0.154809	-0.114083	-0.121719			0.15	0.158273	0.0831838	0.094638	0.078093	0.0844565
	0.151	0.0500939	0.0640934	0.0666388	0.0628207	0.05773			0.151	0.0297308	0.0386396	0.0297308	0.0437304	0.0322762			0.151	-0.205717	-0.1739	-0.163718	-0.11281	-0.103902			0.151	0.151909	0.0691842	0.101001	0.111183	0.104819
	0.152	0.0564573	0.074275	0.0666388	0.061548	0.0437304			0.152	0.041185	0.0437304	0.0539119	0.0271854	0.037367			0.152	-0.184081	-0.171354	-0.1459	-0.139537	-0.0988109			0.152	0.160818	0.0870019	0.101001	0.0984561	0.0844565
	0.153	0.0462758	0.0539119	0.0704569	0.0564573	0.0551846			0.153	0.0424577	0.0360943	0.0360943	0.0437304	0.0233674			0.153	-0.198081	-0.162445	-0.14081	-0.130628	-0.122992			0.153	0.149364	0.0806384	0.0870019	0.0895472	0.0768203
	0.154	0.0539119	0.0691842	0.0602754	0.0539119	0.0526392			0.154	0.041185	0.0399123	0.037367	0.0437304	0.0386396			0.154	-0.200626	-0.158627	-0.157355	-0.134446	-0.106447			0.154	0.154454	0.0730023	0.0933653	0.0908199	0.0704569
	0.155	0.0602754	0.0717296	0.0640934	0.0513665	0.0437304			0.155	0.0526392	0.0348216	0.0360943	0.041185	0.0259127			0.155	-0.208262	-0.164991	-0.153536	-0.139537	-0.11281			0.155	0.160818	0.061548	0.0920926	0.0997288	0.0895472
	0.156	0.0475485	0.074275	0.0653661	0.0526392	0.0437304			0.156	0.0462758	0.037367	0.0551846	0.0386396	0.0284581			0.156	-0.190444	-0.161173	-0.152264	-0.11281	-0.130628			0.156	0.163363	0.0679115	0.0984561	0.0870019	0.0933653
	0.157	0.0564573	0.0717296	0.05773	0.0564573	0.0526392			0.157	0.0462758	0.0475485	0.0399123	0.0539119	0.0335489			0.157	-0.208262	-0.163718	-0.142082	-0.131901	-0.11281			0.157	0.158273	0.0691842	0.0806384	0.078093	0.0882745
	0.158	0.0462758	0.0730023	0.0679115	0.0640934	0.0399123			0.158	0.0488212	0.0437304	0.0386396	0.0526392	0.0386396			0.158	-0.210808	-0.175172	-0.14081	-0.133174	-0.120447			0.158	0.141728	0.05773	0.0933653	0.0984561	0.0920926
	0.159	0.0386396	0.0666388	0.074275	0.05773	0.0437304			0.159	0.0513665	0.0310035	0.0424577	0.0348216	0.0246401			0.159	-0.200626	-0.161173	-0.1459	-0.136991	-0.11281			0.159	0.146818	0.0793657	0.0920926	0.0844565	0.0831838
	0.16	0.0679115	0.0666388	0.0768203	0.0539119	0.0526392			0.16	0.0399123	0.0386396	0.0424577	0.0399123	0.037367			0.16	-0.191717	-0.154809	-0.164991	-0.136991	-0.120447			0.16	0.151909	0.0704569	0.0997288	0.0755476	0.094638
	0.161	0.0437304	0.0730023	0.0691842	0.0450031	0.0462758			0.161	0.0513665	0.0437304	0.0386396	0.0335489	0.0386396			0.161	-0.200626	-0.163718	-0.150991	-0.119174	-0.122992			0.161	0.169727	0.0564573	0.0997288	0.102274	0.0793657
	0.162	0.0500939	0.05773	0.061548	0.0564573	0.0488212			0.162	0.0500939	0.0386396	0.0386396	0.0450031	0.0195493			0.162	-0.203171	-0.164991	-0.163718	-0.130628	-0.0962655			0.162	0.158273	0.0691842	0.101001	0.0844565	0.094638
	0.163	0.0488212	0.0704569	0.0679115	0.05773	0.0475485			0.163	0.0335489	0.0335489	0.0437304	0.0310035	0.0297308			0.163	-0.203171	-0.1599	-0.143355	-0.111538	-0.110265			0.163	0.160818	0.061548	0.106092	0.0959107	0.0870019
	0.164	0.05773	0.0755476	0.0704569	0.0526392	0.0475485			0.164	0.0424577	0.0284581	0.0564573	0.0437304	0.037367			0.164	-0.194263	-0.161173	-0.142082	-0.115356	-0.131901			0.164	0.143	0.0640934	0.0882745	0.0959107	0.0895472
	0.165	0.0526392	0.0653661	0.0730023	0.0539119	0.0526392			0.165	0.0564573	0.0386396	0.0462758	0.0335489	0.0348216			0.165	-0.200626	-0.163718	-0.149718	-0.135719	-0.116628			0.165	0.140455	0.0793657	0.0844565	0.0844565	0.0920926
	0.166	0.0551846	0.074275	0.0666388	0.0450031	0.0500939			0.166	0.0424577	0.0360943	0.0271854	0.0386396	0.020822			0.166	-0.201899	-0.164991	-0.147173	-0.120447	-0.0937201			0.166	0.154454	0.0768203	0.094638	0.0920926	0.094638
	0.167	0.0551846	0.0691842	0.0679115	0.0424577	0.037367			0.167	0.0475485	0.0233674	0.0475485	0.0360943	0.0424577			0.167	-0.215898	-0.161173	-0.136991	-0.144628	-0.115356			0.167	0.150636	0.0628207	0.106092	0.0984561	0.0806384
	0.168	0.0462758	0.0640934	0.0730023	0.0602754	0.0488212			0.168	0.037367	0.0322762	0.0500939	0.0322762	0.0513665			0.168	-0.200626	-0.161173	-0.147173	-0.130628	-0.115356			0.168	0.143	0.0628207	0.102274	0.102274	0.0793657
	0.169	0.0590027	0.0691842	0.0717296	0.041185	0.0475485			0.169	0.0462758	0.0462758	0.0564573	0.0437304	0.0335489			0.169	-0.187899	-0.175172	-0.14081	-0.134446	-0.114083			0.169	0.146818	0.0691842	0.0870019	0.0844565	0.0920926
	0.17	0.0590027	0.0717296	0.0602754	0.05773	0.0437304			0.17	0.0399123	0.0462758	0.0462758	0.0475485	0.0386396			0.17	-0.200626	-0.1739	-0.143355	-0.156082	-0.11281			0.17	0.169727	0.0691842	0.094638	0.0908199	0.0895472
	0.171	0.05773	0.0628207	0.0640934	0.0564573	0.0462758			0.171	0.0437304	0.0399123	0.0500939	0.0437304	0.0335489			0.171	-0.196808	-0.157355	-0.154809	-0.150991	-0.110265			0.171	0.154454	0.0959107	0.0870019	0.0870019	0.0806384
	0.172	0.0437304	0.0691842	0.0679115	0.0526392	0.0437304			0.172	0.0399123	0.0195493	0.0488212	0.0475485	0.0348216			0.172	-0.204444	-0.154809	-0.142082	-0.133174	-0.111538			0.172	0.148091	0.0793657	0.0908199	0.0997288	0.0895472
	0.173	0.0475485	0.0653661	0.0653661	0.0602754	0.0513665			0.173	0.0360943	0.0399123	0.041185	0.037367	0.0399123			0.173	-0.187899	-0.180263	-0.1459	-0.144628	-0.111538			0.173	0.149364	0.0882745	0.0870019	0.0908199	0.0933653
	0.174	0.0539119	0.0679115	0.0590027	0.0526392	0.0475485			0.174	0.0500939	0.0335489	0.0462758	0.0424577	0.0424577			0.174	-0.194263	-0.161173	-0.148446	-0.14081	-0.110265			0.174	0.148091	0.0882745	0.0908199	0.0870019	0.0920926
	0.175	0.0564573	0.0730023	0.0730023	0.05773	0.0551846			0.175	0.0399123	0.0424577	0.0424577	0.0475485	0.0348216			0.175	-0.198081	-0.172627	-0.147173	-0.135719	-0.10772			0.175	0.151909	0.0755476	0.0959107	0.0882745	0.0844565
	0.176	0.0488212	0.0679115	0.0704569	0.0437304	0.0551846			0.176	0.0386396	0.0488212	0.0488212	0.0360943	0.0462758			0.176	-0.215898	-0.156082	-0.147173	-0.154809	-0.114083			0.176	0.157	0.0933653	0.107365	0.0920926	0.107365
	0.177	0.0539119	0.0679115	0.0717296	0.0500939	0.0590027			0.177	0.0475485	0.0284581	0.0424577	0.0462758	0.0322762			0.177	-0.199353	-0.168809	-0.154809	-0.125537	-0.100084			0.177	0.155727	0.0933653	0.0920926	0.0971834	0.0857292
	0.178	0.0513665	0.0666388	0.0717296	0.0526392	0.05773			0.178	0.0475485	0.0399123	0.0475485	0.0437304	0.0360943			0.178	-0.195535	-0.177718	-0.156082	-0.129355	-0.120447			0.178	0.143	0.0997288	0.0908199	0.0959107	0.094638
	0.179	0.0475485	0.074275	0.074275	0.0500939	0.0500939			0.179	0.0360943	0.0335489	0.0475485	0.0360943	0.0322762			0.179	-0.195535	-0.163718	-0.142082	-0.116628	-0.122992			0.179	0.158273	0.106092	0.0857292	0.0870019	0.0755476
	0.18	0.0551846	0.05773	0.0768203	0.05773	0.0386396			0.18	0.0513665	0.0322762	0.0386396	0.0348216	0.0284581			0.18	-0.199353	-0.147173	-0.150991	-0.110265	-0.114083			0.18	0.150636	0.0920926	0.10991	0.0793657	0.0793657
	0.181	0.0640934	0.061548	0.0653661	0.0475485	0.0602754			0.181	0.0399123	0.0500939	0.0450031	0.0475485	0.0399123			0.181	-0.198081	-0.176445	-0.158627	-0.115356	-0.124265			0.181	0.146818	0.0971834	0.0857292	0.0870019	0.0806384
	0.182	0.0500939	0.0640934	0.0628207	0.0539119	0.0475485			0.182	0.041185	0.0399123	0.0195493	0.037367	0.041185			0.182	-0.187899	-0.167536	-0.139537	-0.14081	-0.0975382			0.182	0.151909	0.0997288	0.0793657	0.0997288	0.0895472
	0.183	0.0462758	0.0691842	0.0755476	0.0526392	0.0488212			0.183	0.041185	0.0284581	0.0564573	0.0475485	0.0310035			0.183	-0.208262	-0.166263	-0.143355	-0.136991	-0.110265			0.183	0.150636	0.0971834	0.0882745	0.0819111	0.0844565
	0.184	0.0564573	0.061548	0.0666388	0.05773	0.0513665			0.184	0.0399123	0.0348216	0.0386396	0.0437304	0.0322762			0.184	-0.210808	-0.162445	-0.138264	-0.117901	-0.116628			0.184	0.167181	0.094638	0.0870019	0.0920926	0.0755476
	0.185	0.0488212	0.0640934	0.0691842	0.0488212	0.0602754			0.185	0.0360943	0.0399123	0.0399123	0.0335489	0.0322762			0.185	-0.199353	-0.171354	-0.130628	-0.152264	-0.115356			0.185	0.150636	0.0908199	0.0997288	0.0959107	0.0882745
	0.186	0.0475485	0.0653661	0.0768203	0.0450031	0.0450031			0.186	0.0475485	0.0335489	0.0386396	0.0437304	0.0182766			0.186	-0.200626	-0.164991	-0.154809	-0.144628	-0.116628			0.186	0.134091	0.0882745	0.104819	0.094638	0.0933653
	0.187	0.0437304	0.0717296	0.05773	0.0488212	0.0539119			0.187	0.0450031	0.0271854	0.0450031	0.0437304	0.0348216			0.187	-0.208262	-0.164991	-0.157355	-0.1459	-0.0937201			0.187	0.149364	0.0806384	0.0870019	0.0908199	0.0971834
	0.188	0.0551846	0.0679115	0.0691842	0.0551846	0.0475485			0.188	0.0386396	0.0488212	0.0399123	0.0399123	0.0322762			0.188	-0.194263	-0.184081	-0.1459	-0.142082	-0.116628			0.188	0.158273	0.0844565	0.0959107	0.0857292	0.094638
	0.189	0.0475485	0.0691842	0.0704569	0.0488212	0.0539119			0.189	0.0539119	0.037367	0.0462758	0.0386396	0.037367			0.189	-0.201899	-0.164991	-0.153536	-0.147173	-0.120447			0.189	0.164636	0.0971834	0.101001	0.0882745	0.094638
	0.19	0.0475485	0.074275	0.0666388	0.0628207	0.0526392			0.19	0.0284581	0.0271854	0.0386396	0.0437304	0.020822			0.19	-0.19299	-0.163718	-0.135719	-0.135719	-0.106447			0.19	0.144273	0.0882745	0.0895472	0.0984561	0.0882745
	0.191	0.0462758	0.074275	0.074275	0.0539119	0.061548			0.191	0.0513665	0.0437304	0.0424577	0.037367	0.0233674			0.191	-0.205717	-0.1599	-0.144628	-0.136991	-0.100084			0.191	0.143	0.0882745	0.111183	0.0920926	0.0882745
	0.192	0.0602754	0.0679115	0.0704569	0.0564573	0.0475485			0.192	0.0322762	0.0386396	0.0386396	0.0437304	0.0399123			0.192	-0.201899	-0.156082	-0.142082	-0.138264	-0.120447			0.192	0.163363	0.0895472	0.0933653	0.0895472	0.0793657
	0.193	0.0462758	0.0666388	0.0653661	0.0488212	0.0424577			0.193	0.0462758	0.0322762	0.0500939	0.0424577	0.0475485			0.193	-0.204444	-0.186626	-0.153536	-0.124265	-0.125537			0.193	0.146818	0.0895472	0.10991	0.0793657	0.0984561
	0.194	0.05773	0.0831838	0.0717296	0.0513665	0.0500939			0.194	0.037367	0.0335489	0.0462758	0.0462758	0.0322762			0.194	-0.186626	-0.171354	-0.14081	-0.134446	-0.110265			0.194	0.16209	0.0920926	0.094638	0.0844565	0.0971834
	0.195	0.0475485	0.0653661	0.0755476	0.0488212	0.0462758			0.195	0.0450031	0.0488212	0.0399123	0.0284581	0.0348216			0.195	-0.200626	-0.1739	-0.138264	-0.119174	-0.120447			0.195	0.150636	0.0819111	0.0844565	0.0895472	0.0984561
	0.196	0.0488212	0.0551846	0.0640934	0.0513665	0.037367			0.196	0.0513665	0.0399123	0.037367	0.0450031	0.0360943			0.196	-0.200626	-0.158627	-0.157355	-0.125537	-0.103902			0.196	0.150636	0.0806384	0.0971834	0.0870019	0.0844565
	0.197	0.0539119	0.0806384	0.0551846	0.0424577	0.0602754			0.197	0.0450031	0.0462758	0.0539119	0.0462758	0.0437304			0.197	-0.206989	-0.162445	-0.143355	-0.150991	-0.100084			0.197	0.157	0.0806384	0.0895472	0.094638	0.102274
	0.198	0.0475485	0.0564573	0.0590027	0.0539119	0.0539119			0.198	0.0348216	0.0399123	0.041185	0.041185	0.0386396			0.198	-0.203171	-0.167536	-0.136991	-0.133174	-0.120447			0.198	0.146818	0.0920926	0.0844565	0.0870019	0.0831838
	0.199	0.0488212	0.0602754	0.0704569	0.0475485	0.0424577			0.199	0.0437304	0.0182766	0.0424577	0.0437304	0.0399123			0.199	-0.182808	-0.166263	-0.138264	-0.138264	-0.115356			0.199	0.148091	0.0984561	0.0882745	0.0870019	0.0717296
	0.2	0.0462758	0.0755476	0.0640934	0.0539119	0.0437304			0.2	0.041185	0.0322762	0.0437304	0.0475485	0.0424577			0.2	-0.208262	-0.164991	-0.135719	-0.12681	-0.114083			0.2	0.158273	0.0920926	0.0971834	0.0959107	0.0704569
	0.201	0.0462758	0.0730023	0.0602754	0.05773	0.0628207			0.201	0.0475485	0.0399123	0.0475485	0.0437304	0.0310035			0.201	-0.200626	-0.166263	-0.156082	-0.134446	-0.105174			0.201	0.135364	0.0997288	0.0768203	0.108638	0.0882745
	0.202	0.0513665	0.0730023	0.0602754	0.0590027	0.0513665			0.202	0.0500939	0.0271854	0.0462758	0.0437304	0.041185			0.202	-0.194263	-0.154809	-0.14081	-0.130628	-0.102629			0.202	0.151909	0.0882745	0.101001	0.0908199	0.0717296
	0.203	0.0488212	0.0628207	0.0679115	0.0500939	0.0475485			0.203	0.0513665	0.0322762	0.037367	0.0335489	0.037367			0.203	-0.198081	-0.163718	-0.1459	-0.143355	-0.101356			0.203	0.159545	0.101001	0.107365	0.0933653	0.0819111
	0.204	0.0488212	0.0691842	0.0717296	0.0564573	0.0475485			0.204	0.0322762	0.0513665	0.0437304	0.0424577	0.0360943			0.204	-0.194263	-0.171354	-0.136991	-0.1459	-0.115356			0.204	0.160818	0.102274	0.0857292	0.0857292	0.0831838
	0.205	0.0551846	0.0768203	0.0564573	0.0399123	0.0488212			0.205	0.0450031	0.0348216	0.0335489	0.0462758	0.0271854			0.205	-0.196808	-0.170081	-0.134446	-0.117901	-0.124265			0.205	0.141728	0.078093	0.0895472	0.0908199	0.0933653
	0.206	0.0526392	0.0704569	0.0628207	0.0475485	0.0488212			0.206	0.0437304	0.0322762	0.0322762	0.0297308	0.0284581			0.206	-0.213353	-0.176445	-0.135719	-0.133174	-0.114083			0.206	0.139182	0.0882745	0.0984561	0.102274	0.113728
	0.207	0.061548	0.0730023	0.0640934	0.0539119	0.041185			0.207	0.0450031	0.0348216	0.0450031	0.0297308	0.0322762			0.207	-0.200626	-0.156082	-0.143355	-0.14081	-0.119174			0.207	0.146818	0.0870019	0.0908199	0.0870019	0.0831838
	0.208	0.0500939	0.0653661	0.0691842	0.0526392	0.0513665			0.208	0.0437304	0.0322762	0.0424577	0.0462758	0.0348216			0.208	-0.191717	-0.147173	-0.142082	-0.131901	-0.120447			0.208	0.143	0.0870019	0.094638	0.0793657	0.0793657
	0.209	0.0424577	0.0640934	0.0640934	0.0526392	0.0488212			0.209	0.0551846	0.0284581	0.037367	0.0424577	0.0284581			0.209	-0.21208	-0.166263	-0.157355	-0.115356	-0.102629			0.209	0.149364	0.0895472	0.0895472	0.0933653	0.0831838
	0.21	0.0526392	0.0653661	0.078093	0.05773	0.0450031			0.21	0.0539119	0.041185	0.0564573	0.0602754	0.0246401			0.21	-0.190444	-0.163718	-0.149718	-0.128083	-0.106447			0.21	0.150636	0.0908199	0.0793657	0.0857292	0.094638
	0.211	0.0551846	0.0666388	0.0679115	0.0564573	0.0500939			0.211	0.0488212	0.0297308	0.0399123	0.0437304	0.0348216			0.211	-0.195535	-0.180263	-0.139537	-0.130628	-0.11281			0.211	0.140455	0.0844565	0.0806384	0.0997288	0.0793657
	0.212	0.0475485	0.0730023	0.0691842	0.0564573	0.0539119			0.212	0.0386396	0.0297308	0.041185	0.041185	0.0437304			0.212	-0.190444	-0.172627	-0.143355	-0.128083	-0.122992			0.212	0.132819	0.0895472	0.0933653	0.0933653	0.0793657
	0.213	0.0488212	0.05773	0.0691842	0.0526392	0.0590027			0.213	0.0360943	0.0437304	0.0424577	0.0322762	0.0399123			0.213	-0.205717	-0.1599	-0.14081	-0.136991	-0.115356			0.213	0.150636	0.0933653	0.0895472	0.0959107	0.0806384
	0.214	0.0539119	0.0691842	0.0793657	0.0500939	0.0437304			0.214	0.0551846	0.0360943	0.0500939	0.0424577	0.0233674			0.214	-0.208262	-0.167536	-0.149718	-0.130628	-0.102629			0.214	0.143	0.0933653	0.0997288	0.0933653	0.0857292
	0.215	0.0602754	0.05773	0.0551846	0.041185	0.061548			0.215	0.0488212	0.0360943	0.037367	0.0462758	0.0322762			0.215	-0.194263	-0.156082	-0.134446	-0.135719	-0.114083			0.215	0.143	0.0933653	0.0870019	0.0933653	0.0920926
	0.216	0.0564573	0.0640934	0.0564573	0.061548	0.0590027			0.216	0.0424577	0.0348216	0.041185	0.0475485	0.0360943			0.216	-0.204444	-0.170081	-0.157355	-0.14081	-0.108992			0.216	0.132819	0.0882745	0.104819	0.0933653	0.0920926
	0.217	0.0424577	0.0628207	0.0691842	0.0539119	0.0564573			0.217	0.0297308	0.0322762	0.0322762	0.0348216	0.0360943			0.217	-0.190444	-0.170081	-0.128083	-0.133174	-0.121719			0.217	0.140455	0.0895472	0.0920926	0.0882745	0.094638
	0.218	0.05773	0.0590027	0.0679115	0.0386396	0.0488212			0.218	0.0450031	0.0539119	0.0399123	0.0386396	0.0322762			0.218	-0.199353	-0.163718	-0.149718	-0.147173	-0.105174			0.218	0.145546	0.0997288	0.0959107	0.0768203	0.0971834
	0.219	0.0513665	0.0730023	0.0704569	0.0628207	0.05773			0.219	0.0386396	0.037367	0.0526392	0.0284581	0.0284581			0.219	-0.191717	-0.156082	-0.158627	-0.136991	-0.119174			0.219	0.144273	0.0920926	0.0984561	0.0933653	0.0920926
	0.22	0.0450031	0.0730023	0.0653661	0.0526392	0.0462758			0.22	0.0539119	0.0310035	0.0539119	0.041185	0.0297308			0.22	-0.191717	-0.150991	-0.149718	-0.125537	-0.11281			0.22	0.141728	0.0806384	0.0959107	0.0819111	0.0895472
	0.221	0.0526392	0.0704569	0.05773	0.0500939	0.0500939			0.221	0.041185	0.0310035	0.0399123	0.0322762	0.0386396			0.221	-0.200626	-0.167536	-0.147173	-0.144628	-0.106447			0.221	0.145546	0.106092	0.0908199	0.0908199	0.0806384
	0.222	0.0564573	0.0691842	0.0704569	0.0488212	0.0640934			0.222	0.0488212	0.0462758	0.0475485	0.0297308	0.0335489			0.222	-0.206989	-0.164991	-0.139537	-0.144628	-0.10772			0.222	0.145546	0.0844565	0.0806384	0.094638	0.0882745
	0.223	0.0500939	0.0539119	0.0666388	0.0602754	0.0462758			0.223	0.0335489	0.0348216	0.0437304	0.0462758	0.0322762			0.223	-0.184081	-0.175172	-0.149718	-0.136991	-0.108992			0.223	0.139182	0.0882745	0.104819	0.0806384	0.0806384
	0.224	0.05773	0.0590027	0.0704569	0.041185	0.0462758			0.224	0.0526392	0.0335489	0.0297308	0.05773	0.0259127			0.224	-0.198081	-0.152264	-0.14081	-0.135719	-0.106447			0.224	0.144273	0.094638	0.0959107	0.0870019	0.0920926
	0.225	0.0488212	0.0590027	0.0666388	0.0526392	0.0500939			0.225	0.0335489	0.0246401	0.0335489	0.037367	0.0271854			0.225	-0.200626	-0.164991	-0.154809	-0.152264	-0.110265			0.225	0.130273	0.101001	0.0806384	0.0730023	0.0882745
	0.226	0.0437304	0.0602754	0.0717296	0.0475485	0.0462758			0.226	0.0488212	0.037367	0.0310035	0.0322762	0.0386396			0.226	-0.186626	-0.157355	-0.12681	-0.139537	-0.110265			0.226	0.144273	0.102274	0.0857292	0.0920926	0.0882745
	0.227	0.0551846	0.0590027	0.0590027	0.0539119	0.0500939			0.227	0.0475485	0.0348216	0.0424577	0.0590027	0.0335489			0.227	-0.203171	-0.157355	-0.138264	-0.143355	-0.114083			0.227	0.146818	0.0857292	0.0933653	0.101001	0.0895472
	0.228	0.0462758	0.0704569	0.0653661	0.0602754	0.0462758			0.228	0.0297308	0.0310035	0.0462758	0.0475485	0.0399123			0.228	-0.19299	-0.1599	-0.14081	-0.142082	-0.105174			0.228	0.144273	0.106092	0.094638	0.0768203	0.0870019
	0.229	0.0462758	0.0564573	0.0653661	0.0564573	0.0437304			0.229	0.0424577	0.0488212	0.0462758	0.0450031	0.0271854			0.229	-0.199353	-0.154809	-0.142082	-0.147173	-0.105174			0.229	0.144273	0.107365	0.104819	0.094638	0.0806384
	0.23	0.041185	0.0730023	0.0628207	0.0513665	0.0386396			0.23	0.0437304	0.0399123	0.0348216	0.0539119	0.0271854			0.23	-0.187899	-0.154809	-0.134446	-0.12681	-0.10772			0.23	0.130273	0.0895472	0.107365	0.0844565	0.0857292
	0.231	0.0437304	0.0679115	0.0768203	0.0475485	0.0399123			0.231	0.0475485	0.0335489	0.0399123	0.0335489	0.0297308			0.231	-0.189172	-0.181536	-0.153536	-0.130628	-0.116628			0.231	0.140455	0.0857292	0.0908199	0.0806384	0.103547
	0.232	0.0500939	0.0730023	0.0666388	0.0488212	0.0500939			0.232	0.0526392	0.037367	0.0590027	0.0399123	0.0386396			0.232	-0.194263	-0.157355	-0.1599	-0.130628	-0.122992			0.232	0.132819	0.0895472	0.0793657	0.0920926	0.0831838
	0.233	0.0475485	0.0590027	0.0691842	0.0526392	0.0386396			0.233	0.0424577	0.0335489	0.0450031	0.0437304	0.0284581			0.233	-0.182808	-0.1599	-0.150991	-0.136991	-0.102629			0.233	0.145546	0.094638	0.0997288	0.0857292	0.0857292
	0.234	0.0564573	0.0704569	0.0679115	0.05773	0.0513665			0.234	0.0386396	0.0386396	0.0475485	0.0335489	0.0284581			0.234	-0.209535	-0.163718	-0.134446	-0.147173	-0.108992			0.234	0.146818	0.0882745	0.0831838	0.0895472	0.094638
	0.235	0.0513665	0.0704569	0.0691842	0.0488212	0.0590027			0.235	0.041185	0.0399123	0.0386396	0.0386396	0.0424577			0.235	-0.191717	-0.1599	-0.131901	-0.144628	-0.114083			0.235	0.141728	0.078093	0.0997288	0.0920926	0.0831838
	0.236	0.0500939	0.0602754	0.0640934	0.0488212	0.0437304			0.236	0.0475485	0.0310035	0.0348216	0.0462758	0.0348216			0.236	-0.191717	-0.164991	-0.153536	-0.143355	-0.11281			0.236	0.135364	0.0908199	0.106092	0.0908199	0.0844565
	0.237	0.05773	0.0691842	0.0691842	0.0475485	0.0513665			0.237	0.0348216	0.037367	0.0450031	0.041185	0.0310035			0.237	-0.201899	-0.149718	-0.14081	-0.128083	-0.116628			0.237	0.143	0.0857292	0.0691842	0.0895472	0.0844565
	0.238	0.0437304	0.0653661	0.0590027	0.0488212	0.0335489			0.238	0.0437304	0.0310035	0.0437304	0.0450031	0.0284581			0.238	-0.204444	-0.163718	-0.148446	-0.1459	-0.10772			0.238	0.151909	0.0920926	0.0920926	0.0768203	0.0870019
	0.239	0.0399123	0.0590027	0.0640934	0.0526392	0.0564573			0.239	0.0386396	0.0360943	0.0348216	0.0271854	0.0386396			0.239	-0.190444	-0.153536	-0.136991	-0.138264	-0.115356			0.239	0.153182	0.0793657	0.0971834	0.0895472	0.078093
	0.24	0.0513665	0.05773	0.0526392	0.0551846	0.0437304			0.24	0.0386396	0.0399123	0.0475485	0.0246401	0.0310035			0.24	-0.195535	-0.156082	-0.144628	-0.131901	-0.103902			0.24	0.150636	0.094638	0.0793657	0.0920926	0.0933653
	0.241	0.05773	0.0590027	0.0551846	0.0450031	0.0488212			0.241	0.037367	0.0297308	0.0475485	0.0386396	0.0297308			0.241	-0.195535	-0.176445	-0.164991	-0.135719	-0.119174			0.241	0.137909	0.0870019	0.0971834	0.0857292	0.0882745
	0.242	0.0450031	0.0640934	0.0691842	0.0551846	0.0526392			0.242	0.0462758	0.041185	0.0399123	0.0526392	0.0360943			0.242	-0.200626	-0.1599	-0.131901	-0.158627	-0.106447			0.242	0.146818	0.074275	0.0870019	0.094638	0.0806384
	0.243	0.0500939	0.0691842	0.0691842	0.0564573	0.0500939			0.243	0.0500939	0.0297308	0.0386396	0.0310035	0.037367			0.243	-0.186626	-0.1599	-0.138264	-0.138264	-0.108992			0.243	0.146818	0.0730023	0.0882745	0.0844565	0.0793657
	0.244	0.0399123	0.0628207	0.0551846	0.0526392	0.0500939			0.244	0.0399123	0.0335489	0.0424577	0.0424577	0.0335489			0.244	-0.21208	-0.147173	-0.149718	-0.138264	-0.121719			0.244	0.146818	0.0819111	0.102274	0.0768203	0.0831838
	0.245	0.0500939	0.0730023	0.0691842	0.0590027	0.0475485			0.245	0.0475485	0.0182766	0.0437304	0.0386396	0.0386396			0.245	-0.198081	-0.170081	-0.147173	-0.131901	-0.0962655			0.245	0.140455	0.0691842	0.104819	0.103547	0.0704569
	0.246	0.0526392	0.0755476	0.0640934	0.0475485	0.0500939			0.246	0.0360943	0.0360943	0.0462758	0.0399123	0.0386396			0.246	-0.184081	-0.156082	-0.136991	-0.121719	-0.108992			0.246	0.151909	0.0768203	0.0908199	0.106092	0.0882745
	0.247	0.0386396	0.0590027	0.0704569	0.0500939	0.0437304			0.247	0.041185	0.0386396	0.0399123	0.0513665	0.0386396			0.247	-0.205717	-0.1599	-0.142082	-0.133174	-0.108992			0.247	0.137909	0.0793657	0.0882745	0.094638	0.0870019
	0.248	0.0500939	0.0653661	0.0704569	0.0513665	0.0564573			0.248	0.0513665	0.0259127	0.0488212	0.0526392	0.0322762			0.248	-0.204444	-0.172627	-0.136991	-0.125537	-0.121719			0.248	0.145546	0.0755476	0.0831838	0.0882745	0.0920926
	0.249	0.0513665	0.0640934	0.0793657	0.0564573	0.0488212			0.249	0.0437304	0.0322762	0.0348216	0.0233674	0.0195493			0.249	-0.199353	-0.162445	-0.139537	-0.134446	-0.110265			0.249	0.137909	0.0730023	0.0819111	0.0908199	0.0933653
	0.25	0.0500939	0.0691842	0.0564573	0.0500939	0.0628207			0.25	0.0335489	0.0360943	0.0475485	0.0437304	0.0386396			0.25	-0.189172	-0.148446	-0.142082	-0.129355	-0.101356			0.25	0.145546	0.0564573	0.094638	0.0857292	0.0806384
	0.251	0.0539119	0.061548	0.0602754	0.0462758	0.0424577			0.251	0.0360943	0.0526392	0.0424577	0.0310035	0.0500939			0.251	-0.200626	-0.166263	-0.144628	-0.148446	-0.114083			0.251	0.137909	0.0768203	0.0971834	0.094638	0.0844565
	0.252	0.0488212	0.0717296	0.05773	0.0437304	0.05773			0.252	0.0488212	0.0360943	0.0513665	0.041185	0.0297308			0.252	-0.182808	-0.156082	-0.1599	-0.139537	-0.0975382			0.252	0.150636	0.061548	0.0882745	0.0831838	0.0819111
	0.253	0.0271854	0.05773	0.0602754	0.0526392	0.0475485			0.253	0.037367	0.0424577	0.0259127	0.0360943	0.0335489			0.253	-0.185354	-0.154809	-0.133174	-0.131901	-0.105174			0.253	0.130273	0.0768203	0.107365	0.094638	0.0882745
	0.254	0.0539119	0.0768203	0.0793657	0.0450031	0.0551846			0.254	0.0450031	0.0437304	0.041185	0.0500939	0.0399123			0.254	-0.194263	-0.162445	-0.143355	-0.135719	-0.120447			0.254	0.149364	0.0539119	0.0793657	0.0793657	0.0997288
	0.255	0.0475485	0.0628207	0.0691842	0.0564573	0.0640934			0.255	0.041185	0.0259127	0.0462758	0.0322762	0.0424577			0.255	-0.200626	-0.156082	-0.142082	-0.1459	-0.10772			0.255	0.155727	0.05773	0.0933653	0.0831838	0.0844565
	0.256	0.0450031	0.061548	0.0666388	0.0551846	0.05773			0.256	0.0475485	0.020822	0.0322762	0.0450031	0.0284581			0.256	-0.19299	-0.157355	-0.135719	-0.138264	-0.0962655			0.256	0.143	0.0640934	0.0882745	0.0882745	0.0819111
	0.257	0.05773	0.0679115	0.0666388	0.0551846	0.0437304			0.257	0.0462758	0.0284581	0.0399123	0.0437304	0.0259127			0.257	-0.199353	-0.158627	-0.152264	-0.122992	-0.115356			0.257	0.141728	0.0704569	0.0882745	0.0971834	0.0844565
	0.258	0.0564573	0.0755476	0.0679115	0.0526392	0.0513665			0.258	0.0335489	0.0386396	0.0475485	0.0360943	0.0360943			0.258	-0.200626	-0.153536	-0.1459	-0.128083	-0.120447			0.258	0.129001	0.0564573	0.0920926	0.0971834	0.0793657
	0.259	0.0526392	0.0640934	0.0793657	0.0590027	0.0526392			0.259	0.0424577	0.0335489	0.0399123	0.041185	0.0322762			0.259	-0.17899	-0.1739	-0.124265	-0.125537	-0.0988109			0.259	0.140455	0.0628207	0.0920926	0.0920926	0.0882745
	0.26	0.0437304	0.0640934	0.0666388	0.0488212	0.0539119			0.26	0.0500939	0.0297308	0.0399123	0.0424577	0.0399123			0.26	-0.205717	-0.164991	-0.125537	-0.143355	-0.106447			0.26	0.148091	0.0500939	0.0971834	0.0806384	0.094638
	0.261	0.0513665	0.0666388	0.0526392	0.0437304	0.0526392			0.261	0.0475485	0.0195493	0.0437304	0.041185	0.0437304			0.261	-0.208262	-0.167536	-0.139537	-0.131901	-0.115356			0.261	0.146818	0.0462758	0.0768203	0.0844565	0.0819111
	0.262	0.0513665	0.0653661	0.0666388	0.0500939	0.0539119			0.262	0.0310035	0.037367	0.0348216	0.0526392	0.0310035			0.262	-0.185354	-0.164991	-0.149718	-0.144628	-0.106447			0.262	0.131546	0.0691842	0.101001	0.0882745	0.0882745
	0.263	0.0526392	0.0691842	0.074275	0.0500939	0.0602754			0.263	0.037367	0.0360943	0.05773	0.0437304	0.0322762			0.263	-0.198081	-0.162445	-0.143355	-0.152264	-0.0988109			0.263	0.144273	0.0691842	0.0908199	0.0870019	0.0908199
	0.264	0.0590027	0.0691842	0.0590027	0.0526392	0.0475485			0.264	0.0386396	0.037367	0.041185	0.0360943	0.037367			0.264	-0.186626	-0.153536	-0.131901	-0.130628	-0.117901			0.264	0.144273	0.0450031	0.0844565	0.0831838	0.0768203
	0.265	0.0475485	0.0640934	0.0564573	0.0500939	0.0488212			0.265	0.041185	0.041185	0.037367	0.0437304	0.0297308			0.265	-0.198081	-0.144628	-0.144628	-0.129355	-0.114083			0.265	0.135364	0.0564573	0.0895472	0.0806384	0.0895472
	0.266	0.0539119	0.0653661	0.0666388	0.0488212	0.0475485			0.266	0.0360943	0.0271854	0.0539119	0.0475485	0.0462758			0.266	-0.191717	-0.156082	-0.131901	-0.147173	-0.0988109			0.266	0.145546	0.0526392	0.094638	0.0844565	0.0933653
	0.267	0.0450031	0.074275	0.074275	0.0551846	0.0539119			0.267	0.0488212	0.0348216	0.041185	0.0399123	0.0259127			0.267	-0.194263	-0.164991	-0.152264	-0.131901	-0.102629			0.267	0.154454	0.0628207	0.0895472	0.0933653	0.0959107
	0.268	0.0437304	0.0691842	0.0590027	0.0475485	0.0437304			0.268	0.0500939	0.0335489	0.0271854	0.0437304	0.0424577			0.268	-0.194263	-0.162445	-0.143355	-0.152264	-0.11281			0.268	0.137909	0.0475485	0.0793657	0.094638	0.0819111
	0.269	0.0564573	0.0691842	0.0628207	0.0564573	0.0475485			0.269	0.0424577	0.0271854	0.037367	0.0271854	0.0220947			0.269	-0.185354	-0.1739	-0.12681	-0.164991	-0.103902			0.269	0.139182	0.0513665	0.0793657	0.0882745	0.0666388
	0.27	0.0386396	0.0653661	0.0691842	0.0437304	0.0475485			0.27	0.0360943	0.0360943	0.0424577	0.0360943	0.0284581			0.27	-0.17899	-0.150991	-0.142082	-0.134446	-0.131901			0.27	0.139182	0.0475485	0.0895472	0.0844565	0.0870019
	0.271	0.0462758	0.074275	0.0602754	0.0551846	0.0513665			0.271	0.0488212	0.0335489	0.037367	0.0335489	0.0335489			0.271	-0.200626	-0.1599	-0.142082	-0.129355	-0.101356			0.271	0.157	0.0488212	0.0984561	0.0933653	0.0717296
	0.272	0.0450031	0.0691842	0.0602754	0.0424577	0.0564573			0.272	0.0488212	0.037367	0.0450031	0.0450031	0.0360943			0.272	-0.196808	-0.163718	-0.136991	-0.125537	-0.111538			0.272	0.146818	0.0462758	0.104819	0.0844565	0.078093
	0.273	0.0462758	0.0539119	0.0551846	0.05773	0.0500939			0.273	0.0360943	0.0386396	0.0246401	0.0437304	0.0297308			0.273	-0.186626	-0.170081	-0.139537	-0.139537	-0.115356			0.273	0.139182	0.05773	0.0857292	0.0831838	0.0819111
	0.274	0.037367	0.0691842	0.0717296	0.0488212	0.0500939			0.274	0.0386396	0.037367	0.0488212	0.0386396	0.0310035			0.274	-0.189172	-0.153536	-0.139537	-0.152264	-0.0975382			0.274	0.135364	0.0590027	0.0691842	0.0882745	0.0895472
	0.275	0.0475485	0.0602754	0.061548	0.0462758	0.0450031			0.275	0.0437304	0.0335489	0.0399123	0.0348216	0.0297308			0.275	-0.19299	-0.157355	-0.134446	-0.134446	-0.114083			0.275	0.144273	0.0526392	0.0997288	0.0870019	0.0908199
	0.276	0.0564573	0.0653661	0.0691842	0.0500939	0.0386396			0.276	0.0386396	0.0284581	0.0437304	0.0386396	0.0322762			0.276	-0.210808	-0.164991	-0.136991	-0.14081	-0.0949928			0.276	0.131546	0.0488212	0.102274	0.0793657	0.0793657
	0.277	0.0488212	0.0704569	0.0666388	0.0462758	0.0564573			0.277	0.0450031	0.0246401	0.0424577	0.0335489	0.0271854			0.277	-0.194263	-0.148446	-0.134446	-0.124265	-0.108992			0.277	0.150636	0.0424577	0.0997288	0.101001	0.0895472
	0.278	0.0475485	0.0704569	0.0640934	0.0488212	0.0437304			0.278	0.0475485	0.0310035	0.041185	0.0335489	0.037367			0.278	-0.191717	-0.162445	-0.139537	-0.120447	-0.128083			0.278	0.144273	0.0488212	0.0882745	0.0997288	0.094638
	0.279	0.0551846	0.0653661	0.0602754	0.05773	0.0539119			0.279	0.0437304	0.0488212	0.0475485	0.0386396	0.0297308			0.279	-0.190444	-0.150991	-0.1459	-0.148446	-0.116628			0.279	0.139182	0.041185	0.0768203	0.0806384	0.0844565
	0.28	0.0500939	0.0602754	0.0640934	0.0437304	0.0513665			0.28	0.0348216	0.0322762	0.0424577	0.0399123	0.0233674			0.28	-0.19299	-0.163718	-0.138264	-0.12681	-0.0988109			0.28	0.137909	0.0399123	0.0971834	0.0768203	0.0908199
	0.281	0.0488212	0.0730023	0.0691842	0.0539119	0.0399123			0.281	0.0462758	0.0310035	0.0322762	0.0335489	0.0322762			0.281	-0.19299	-0.164991	-0.139537	-0.134446	-0.0988109			0.281	0.129001	0.0602754	0.0959107	0.0895472	0.0831838
	0.282	0.0386396	0.0793657	0.0730023	0.0564573	0.0386396			0.282	0.0424577	0.0322762	0.0488212	0.0310035	0.0335489			0.282	-0.191717	-0.154809	-0.157355	-0.133174	-0.117901			0.282	0.134091	0.0488212	0.0882745	0.0755476	0.0844565
	0.283	0.0513665	0.0691842	0.0666388	0.0513665	0.0424577			0.283	0.0475485	0.0462758	0.0488212	0.0322762	0.0360943			0.283	-0.201899	-0.167536	-0.143355	-0.138264	-0.102629			0.283	0.144273	0.0488212	0.0882745	0.0920926	0.0806384
	0.284	0.0590027	0.0640934	0.0564573	0.0551846	0.0539119			0.284	0.0386396	0.0284581	0.0424577	0.0488212	0.0437304			0.284	-0.199353	-0.143355	-0.136991	-0.138264	-0.117901			0.284	0.150636	0.0513665	0.0768203	0.0908199	0.0717296
	0.285	0.0513665	0.0666388	0.0717296	0.0526392	0.037367			0.285	0.0297308	0.0246401	0.0437304	0.0437304	0.0233674			0.285	-0.199353	-0.153536	-0.138264	-0.130628	-0.0962655			0.285	0.139182	0.0526392	0.107365	0.0768203	0.0730023
	0.286	0.0386396	0.0539119	0.0679115	0.0526392	0.0462758			0.286	0.0399123	0.0450031	0.0424577	0.0360943	0.0170039			0.286	-0.200626	-0.1599	-0.139537	-0.143355	-0.114083			0.286	0.129001	0.0539119	0.0959107	0.0908199	0.078093
	0.287	0.0488212	0.0640934	0.0526392	0.0462758	0.0475485			0.287	0.0437304	0.0322762	0.0297308	0.0462758	0.0335489			0.287	-0.196808	-0.1599	-0.133174	-0.149718	-0.114083			0.287	0.131546	0.0424577	0.0831838	0.0831838	0.0768203
	0.288	0.0450031	0.0691842	0.074275	0.0513665	0.0551846			0.288	0.0437304	0.0437304	0.037367	0.0322762	0.0348216			0.288	-0.182808	-0.163718	-0.1459	-0.12681	-0.108992			0.288	0.131546	0.041185	0.0920926	0.0895472	0.0857292
	0.289	0.0475485	0.074275	0.074275	0.0424577	0.0386396			0.289	0.0500939	0.0322762	0.0386396	0.0437304	0.0348216			0.289	-0.196808	-0.154809	-0.133174	-0.136991	-0.100084			0.289	0.134091	0.037367	0.0819111	0.0857292	0.0870019
	0.29	0.0475485	0.0564573	0.0666388	0.0399123	0.0539119			0.29	0.0475485	0.0157312	0.0322762	0.0462758	0.041185			0.29	-0.184081	-0.152264	-0.136991	-0.133174	-0.106447			0.29	0.140455	0.0602754	0.0857292	0.0870019	0.0971834
	0.291	0.0462758	0.05773	0.0640934	0.0488212	0.0462758			0.291	0.0360943	0.0360943	0.0386396	0.0271854	0.0195493			0.291	-0.189172	-0.152264	-0.136991	-0.135719	-0.119174			0.291	0.136637	0.0399123	0.0844565	0.0768203	0.0793657
	0.292	0.041185	0.05773	0.0590027	0.0437304	0.0488212			0.292	0.0360943	0.0322762	0.037367	0.041185	0.0335489			0.292	-0.203171	-0.152264	-0.157355	-0.131901	-0.11281			0.292	0.12391	0.0462758	0.0908199	0.0933653	0.0895472
	0.293	0.0475485	0.0666388	0.0691842	0.05773	0.0386396			0.293	0.0399123	0.0220947	0.0335489	0.0360943	0.0386396			0.293	-0.181536	-0.167536	-0.135719	-0.134446	-0.0975382			0.293	0.151909	0.0399123	0.0870019	0.0895472	0.0895472
	0.294	0.0539119	0.0653661	0.0640934	0.0500939	0.0513665			0.294	0.0513665	0.05773	0.0450031	0.0348216	0.0310035			0.294	-0.189172	-0.175172	-0.129355	-0.130628	-0.117901			0.294	0.136637	0.0475485	0.0870019	0.0806384	0.0959107
	0.295	0.0488212	0.0628207	0.0513665	0.0475485	0.0628207			0.295	0.0500939	0.0386396	0.0462758	0.041185	0.0335489			0.295	-0.181536	-0.158627	-0.149718	-0.131901	-0.115356			0.295	0.141728	0.0590027	0.0920926	0.0895472	0.0857292
	0.296	0.0450031	0.0653661	0.0691842	0.0539119	0.0500939			0.296	0.041185	0.0322762	0.0284581	0.0335489	0.0259127			0.296	-0.196808	-0.153536	-0.124265	-0.128083	-0.0988109			0.296	0.131546	0.0500939	0.0819111	0.0755476	0.0793657
	0.297	0.0386396	0.0717296	0.0602754	0.0475485	0.0513665			0.297	0.0386396	0.0322762	0.0424577	0.0437304	0.0335489			0.297	-0.196808	-0.170081	-0.138264	-0.136991	-0.105174			0.297	0.120092	0.0450031	0.0895472	0.094638	0.0691842
	0.298	0.0437304	0.0628207	0.0526392	0.0488212	0.0488212			0.298	0.0399123	0.0233674	0.0513665	0.0564573	0.0322762			0.298	-0.195535	-0.158627	-0.136991	-0.139537	-0.108992			0.298	0.145546	0.0564573	0.094638	0.0933653	0.0908199
	0.299	0.0500939	0.0640934	0.0666388	0.0500939	0.0564573			0.299	0.0488212	0.0360943	0.0348216	0.041185	0.0360943			0.299	-0.198081	-0.156082	-0.147173	-0.139537	-0.114083			0.299	0.134091	0.0551846	0.0857292	0.0819111	0.0704569
	0.3	0.0526392	0.0640934	0.0640934	0.0462758	0.0424577			0.3	0.0437304	0.0399123	0.0297308	0.0437304	0.0259127			0.3	-0.186626	-0.158627	-0.124265	-0.129355	-0.0937201			0.3	0.130273	0.0539119	0.0844565	0.0908199	0.074275
	0.301	0.0399123	0.0653661	0.0755476	0.0513665	0.0539119			0.301	0.0424577	0.041185	0.0335489	0.0348216	0.0271854			0.301	-0.187899	-0.1599	-0.133174	-0.122992	-0.11281			0.301	0.132819	0.037367	0.0997288	0.0730023	0.0908199
	0.302	0.0437304	0.05773	0.0590027	0.0488212	0.05773			0.302	0.0424577	0.041185	0.05773	0.037367	0.0399123			0.302	-0.190444	-0.164991	-0.138264	-0.131901	-0.11281			0.302	0.139182	0.0386396	0.078093	0.0755476	0.074275
	0.303	0.0602754	0.0755476	0.0564573	0.0526392	0.0450031			0.303	0.0386396	0.0360943	0.037367	0.0437304	0.0310035			0.303	-0.21208	-0.158627	-0.135719	-0.133174	-0.108992			0.303	0.135364	0.0399123	0.0920926	0.0882745	0.0793657
	0.304	0.037367	0.0666388	0.05773	0.0488212	0.0386396			0.304	0.0564573	0.0335489	0.0488212	0.0310035	0.0386396			0.304	-0.191717	-0.154809	-0.130628	-0.139537	-0.117901			0.304	0.130273	0.0526392	0.0882745	0.0870019	0.0768203
	0.305	0.0399123	0.05773	0.0551846	0.0488212	0.0450031			0.305	0.041185	0.0399123	0.0360943	0.0386396	0.0322762			0.305	-0.196808	-0.167536	-0.135719	-0.135719	-0.105174			0.305	0.139182	0.0564573	0.0831838	0.0844565	0.0920926
	0.306	0.0462758	0.0691842	0.0602754	0.0450031	0.0462758			0.306	0.0450031	0.0322762	0.0424577	0.0386396	0.0360943			0.306	-0.191717	-0.154809	-0.130628	-0.135719	-0.114083			0.306	0.131546	0.0691842	0.0755476	0.0908199	0.0819111
	0.307	0.0539119	0.0691842	0.0628207	0.0526392	0.0424577			0.307	0.0348216	0.0284581	0.0322762	0.0348216	0.0488212			0.307	-0.194263	-0.143355	-0.139537	-0.139537	-0.110265			0.307	0.132819	0.0551846	0.0819111	0.094638	0.0730023
	0.308	0.0564573	0.0602754	0.0475485	0.0399123	0.0386396			0.308	0.0437304	0.0271854	0.0424577	0.0424577	0.0284581			0.308	-0.185354	-0.1599	-0.144628	-0.148446	-0.105174			0.308	0.127728	0.0564573	0.0844565	0.0819111	0.0870019
	0.309	0.0475485	0.0819111	0.0640934	0.0513665	0.0437304			0.309	0.0386396	0.0386396	0.041185	0.0450031	0.00936778			0.309	-0.205717	-0.153536	-0.144628	-0.149718	-0.115356			0.309	0.137909	0.05773	0.0857292	0.0831838	0.0768203
	0.31	0.0539119	0.074275	0.0640934	0.0399123	0.0475485			0.31	0.0500939	0.0297308	0.0539119	0.0348216	0.0233674			0.31	-0.195535	-0.157355	-0.136991	-0.143355	-0.101356			0.31	0.125183	0.0450031	0.0920926	0.0870019	0.0920926
	0.311	0.0526392	0.0539119	0.0640934	0.0322762	0.0500939			0.311	0.041185	0.0348216	0.0322762	0.0310035	0.0310035			0.311	-0.229898	-0.177718	-0.122992	-0.136991	-0.101356			0.311	0.140455	0.0551846	0.0870019	0.0882745	0.0831838
	0.312	0.0475485	0.0691842	0.0666388	0.05773	0.0500939			0.312	0.0360943	0.0284581	0.041185	0.037367	0.0284581			0.312	-0.200626	-0.161173	-0.131901	-0.149718	-0.110265			0.312	0.151909	0.0437304	0.0844565	0.0831838	0.0857292
	0.313	0.0475485	0.0666388	0.0640934	0.0500939	0.0475485			0.313	0.0437304	0.0310035	0.0437304	0.0399123	0.0297308			0.313	-0.210808	-0.153536	-0.139537	-0.1459	-0.103902			0.313	0.129001	0.061548	0.0908199	0.0933653	0.0755476
	0.314	0.0488212	0.0640934	0.0717296	0.0526392	0.041185			0.314	0.0399123	0.0322762	0.0284581	0.0399123	0.0310035			0.314	-0.228625	-0.156082	-0.139537	-0.1459	-0.100084			0.314	0.12391	0.0386396	0.0870019	0.0793657	0.078093
	0.315	0.0551846	0.0628207	0.0564573	0.0526392	0.0437304			0.315	0.0488212	0.0271854	0.0450031	0.0297308	0.020822			0.315	-0.228625	-0.1599	-0.124265	-0.136991	-0.115356			0.315	0.135364	0.0437304	0.0806384	0.0857292	0.0831838
	0.316	0.0539119	0.061548	0.0590027	0.0500939	0.0513665			0.316	0.0399123	0.0526392	0.0322762	0.0386396	0.0271854			0.316	-0.257897	-0.162445	-0.119174	-0.1459	-0.116628			0.316	0.154454	0.0666388	0.0895472	0.0755476	0.0831838
	0.317	0.0462758	0.0602754	0.0500939	0.0424577	0.0539119			0.317	0.0335489	0.0233674	0.0500939	0.0386396	0.0233674			0.317	-0.260442	-0.158627	-0.139537	-0.142082	-0.108992			0.317	0.144273	0.0437304	0.0857292	0.0806384	0.074275
	0.318	0.037367	0.0590027	0.0602754	0.041185	0.0437304			0.318	0.0437304	0.0335489	0.0360943	0.0284581	0.020822			0.318	-0.261715	-0.154809	-0.110265	-0.1459	-0.106447			0.318	0.135364	0.0488212	0.0844565	0.0984561	0.0806384
	0.319	0.0437304	0.0640934	0.0437304	0.0500939	0.0475485			0.319	0.0424577	0.041185	0.0322762	0.041185	0.0348216			0.319	-0.308805	-0.162445	-0.134446	-0.129355	-0.114083			0.319	0.125183	0.0424577	0.0882745	0.0730023	0.0895472
	0.32	0.0424577	0.061548	0.061548	0.0424577	0.0424577			0.32	0.0348216	0.0450031	0.0335489	0.0233674	0.0233674			0.32	-0.321532	-0.161173	-0.125537	-0.14081	-0.111538			0.32	0.136637	0.0462758	0.0793657	0.0679115	0.0819111
	0.321	0.0437304	0.0590027	0.0590027	0.0360943	0.0564573			0.321	0.0488212	0.0322762	0.0437304	0.0297308	0.020822			0.321	-0.336804	-0.158627	-0.114083	-0.122992	-0.0988109			0.321	0.137909	0.0475485	0.0870019	0.0959107	0.0755476
	0.322	0.0399123	0.0666388	0.0526392	0.0526392	0.0551846			0.322	0.0348216	0.020822	0.0462758	0.037367	0.0170039			0.322	-0.339349	-0.154809	-0.116628	-0.134446	-0.0962655			0.322	0.121365	0.041185	0.0831838	0.0793657	0.0679115
	0.323	0.0462758	0.0564573	0.05773	0.0488212	0.0386396			0.323	0.0462758	0.0233674	0.0322762	0.037367	0.0271854			0.323	-0.341895	-0.1599	-0.121719	-0.120447	-0.086084			0.323	0.134091	0.0450031	0.0908199	0.0857292	0.0793657
	0.324	0.0437304	0.0691842	0.0640934	0.0462758	0.0475485			0.324	0.041185	0.0386396	0.0322762	0.0475485	0.0157312			0.324	-0.354621	-0.130628	-0.114083	-0.119174	-0.0988109			0.324	0.116274	0.0500939	0.0920926	0.0730023	0.0844565
	0.325	0.0475485	0.074275	0.0539119	0.0590027	0.0564573			0.325	0.041185	0.0437304	0.0462758	0.0386396	0.0170039			0.325	-0.34444	-0.153536	-0.117901	-0.124265	-0.11281			0.325	0.127728	0.0424577	0.0831838	0.0717296	0.0691842
	0.326	0.0488212	0.0768203	0.0666388	0.0500939	0.0386396			0.326	0.041185	0.0335489	0.0399123	0.0386396	0.0310035			0.326	-0.352076	-0.134446	-0.111538	-0.105174	-0.0988109			0.326	0.125183	0.0488212	0.0819111	0.05773	0.0768203
	0.327	0.0564573	0.0526392	0.0488212	0.0551846	0.05773			0.327	0.0526392	0.0297308	0.041185	0.0399123	0.0233674			0.327	-0.374984	-0.152264	-0.106447	-0.105174	-0.0848113			0.327	0.131546	0.0488212	0.0984561	0.078093	-0.4768
	0.328	0.0539119	0.0640934	0.0691842	0.0590027	0.0564573			0.328	0.0500939	0.0322762	0.0526392	0.0513665	0.0271854			0.328	-0.376257	-0.138264	-0.106447	-0.102629	-0.0886293			0.328	0.132819	0.0500939	0.0870019	0.0819111	0.41281
	0.329	0.0488212	0.0691842	0.061548	0.0602754	0.0526392			0.329	0.0526392	0.0335489	0.0602754	0.0526392	0.0322762			0.329	-0.385166	-0.152264	-0.119174	-0.119174	-0.0809932			0.329	0.131546	0.0590027	0.106092	0.0844565	1.12806
	0.33	0.0475485	0.0704569	0.0653661	0.0590027	0.0666388			0.33	0.0551846	0.0450031	0.0564573	0.0551846	0.0310035			0.33	-0.386439	-0.129355	-0.105174	-0.108992	-0.0771751			0.33	0.137909	0.0666388	0.094638	0.0882745	0.536261
	0.331	0.0526392	0.0704569	0.074275	0.0679115	0.05773			0.331	0.0590027	0.041185	0.0539119	0.0806384	0.0284581			0.331	-0.392802	-0.129355	-0.103902	-0.115356	-0.0809932			0.331	0.125183	0.0628207	0.111183	0.094638	0.375902
	0.332	0.0526392	0.0793657	0.0831838	0.0691842	0.074275			0.332	0.0475485	0.0450031	0.0564573	0.0679115	0.0335489			0.332	-0.408074	-0.120447	-0.0962655	-0.105174	-0.0759024			0.332	0.139182	0.0704569	0.108638	0.0971834	0.230816
	0.333	0.0450031	0.0831838	0.0679115	0.0730023	0.0793657			0.333	0.0640934	0.05773	0.0602754	0.0640934	0.0386396			0.333	-0.422074	-0.129355	-0.103902	-0.101356	-0.0708117			0.333	0.134091	0.0539119	0.121365	0.0857292	0.226998
	0.334	0.0539119	0.0819111	0.0806384	0.0857292	0.0831838			0.334	0.0602754	0.05773	0.074275	0.29445	0.0335489			0.334	-0.441164	-0.105174	-0.0924474	-0.10772	-0.0873566			0.334	0.139182	0.0437304	0.113728	0.107365	0.191362
	0.335	0.05773	0.0882745	0.0793657	0.094638	0.0882745			0.335	0.0475485	0.0488212	0.0730023	0.839162	0.0348216			0.335	-0.436074	-0.106447	-0.086084	-0.110265	-0.069539			0.335	0.141728	0.0590027	0.108638	0.108638	0.168454
	0.336	0.0551846	0.078093	0.0844565	0.0908199	0.0793657			0.336	0.0399123	0.0475485	0.0666388	0.408992	0.0335489			0.336	-0.428438	-0.117901	-0.0720844	-0.115356	-0.0988109			0.336	0.136637	0.05773	0.130273	0.129001	0.155727
	0.337	0.0653661	0.0959107	0.094638	0.107365	0.0590027			0.337	0.0310035	0.0475485	0.0793657	-0.00972257	0.0360943			0.337	-0.441164	-0.0886293	-0.0657209	-0.0911747	-0.14081			0.337	0.131546	0.0590027	0.139182	0.0857292	0.168454
	0.338	0.0640934	0.0920926	0.0997288	0.0831838	0.00936778			0.338	0.0233674	0.0500939	0.0959107	-0.0988109	0.0500939			0.338	-0.424619	-0.0669936	-0.0657209	-0.125537	-0.191717			0.338	0.154454	0.0653661	0.129001	0.570624	0.163363
	0.339	0.0590027	0.0908199	0.0933653	0.0768203	-0.0453579			0.339	0.0068224	0.0679115	0.0882745	-0.130628	0.0564573			0.339	-0.418256	0.163363	-0.049176	-0.131901	-0.265533			0.339	0.134091	0.0666388	0.135364	0.890069	0.182454
	0.34	0.0526392	0.102274	0.094638	0.05773	-0.115356			0.34	0.00427702	0.0628207	0.0984561	-0.125537	0.0513665			0.34	-0.394075	0.405174	-0.0377217	-0.119174	-0.294805			0.34	0.139182	0.0590027	0.153182	0.59735	0.181181
	0.341	0.0628207	0.0844565	0.0882745	0.0590027	-0.184081			0.341	-0.0059045	0.0539119	0.0984561	-0.153536	0.0475485			0.341	-0.420801	0.323722	-0.0237222	-0.116628	-0.332986			0.341	0.130273	0.074275	0.163363	0.363175	0.195181
	0.342	0.05773	0.104819	0.0920926	0.0437304	-0.229898			0.342	-0.0109953	0.0666388	0.120092	-0.148446	0.0500939			0.342	-0.404256	0.229543	-0.0224495	-0.121719	-0.346985			0.342	0.136637	0.0819111	0.188817	0.277905	0.205362
	0.343	0.0475485	0.108638	0.0793657	0.0106405	-0.283351			0.343	-0.0186314	0.0806384	0.117546	-0.156082	0.0602754			0.343	-0.432256	0.153182	-0.0224495	-0.120447	-0.334258			0.343	0.125183	0.118819	0.210453	0.243543	0.234634
	0.344	0.0500939	0.116274	0.0908199	0.0068224	-0.312623			0.344	-0.0199041	0.0819111	0.121365	-0.148446	0.0564573			0.344	-0.423347	0.101001	-0.0173587	-0.110265	-0.321532			0.344	0.121365	0.117546	0.220634	0.215543	0.246088
	0.345	0.0488212	0.12391	0.0679115	-0.0122679	-0.326622			0.345	-0.0313583	0.0971834	0.117546	-0.156082	0.0704569			0.345	-0.416983	0.000458949	-0.0135406	-0.101356	-0.320259			0.345	0.094638	0.154454	0.251179	0.22827	0.248633
	0.346	0.0526392	0.125183	0.0793657	-0.0148133	-0.35844			0.346	-0.0211768	0.102274	0.135364	-0.142082	0.0564573			0.346	-0.415711	-0.089902	-0.0262675	-0.114083	-0.303714			0.346	0.0793657	0.181181	0.263906	0.229543	0.277905
	0.347	0.0500939	0.140455	0.0755476	-0.0300856	-0.372439			0.347	-0.0351764	0.113728	0.143	-0.1459	0.0666388			0.347	-0.434801	-0.135719	-0.0313583	-0.115356	-0.268079			0.347	0.0666388	0.192635	0.277905	0.235906	0.302086
	0.348	0.0424577	0.134091	0.0768203	-0.0389944	-0.386439			0.348	-0.0377217	0.108638	0.132819	-0.175172	0.0666388			0.348	-0.413165	-0.204444	-0.036449	-0.115356	-0.237534			0.348	0.05773	0.219362	0.298268	0.257542	0.312268
	0.349	0.0437304	0.127728	0.0819111	-0.0466306	-0.392802			0.349	-0.0389944	0.127728	0.153182	-0.158627	0.0653661			0.349	-0.419529	-0.21208	-0.0313583	-0.124265	-0.224807			0.349	0.020822	0.237179	0.322449	0.296996	0.324995
	0.35	0.0500939	0.148091	0.078093	-0.0568121	-0.406802			0.35	-0.0542667	0.10991	0.154454	-0.185354	0.0551846			0.35	-0.401711	-0.232443	-0.0479033	-0.116628	-0.209535			0.35	0.00809509	0.262633	0.336449	0.293178	0.335176
	0.351	0.0297308	0.137909	0.0806384	-0.0631755	-0.42971			0.351	-0.0682663	0.117546	0.144273	-0.177718	0.0640934			0.351	-0.409347	-0.220989	-0.0580848	-0.122992	-0.176445			0.351	-0.00335912	0.270269	0.342813	0.319904	0.345358
	0.352	0.0437304	0.135364	0.0730023	-0.0568121	-0.42971			0.352	-0.052994	0.130273	0.151909	-0.180263	0.0628207			0.352	-0.41062	-0.219716	-0.0606302	-0.124265	-0.153536			0.352	-0.0542667	0.290632	0.358085	0.328813	0.356812
	0.353	0.041185	0.132819	0.0653661	-0.0542667	-0.450073			0.353	-0.073357	0.130273	0.160818	-0.177718	0.05773			0.353	-0.401711	-0.208262	-0.052994	-0.125537	-0.139537			0.353	-0.0631755	0.30845	0.361903	0.337722	0.344085
	0.354	0.0322762	0.132819	0.0653661	-0.0708117	-0.446255			0.354	-0.073357	0.125183	0.158273	-0.201899	0.0564573			0.354	-0.413165	-0.199353	-0.0517213	-0.134446	-0.110265			0.354	-0.0542667	0.321177	0.358085	0.359357	0.364448
	0.355	0.037367	0.129001	0.0488212	-0.0657209	-0.446255			0.355	-0.0797205	0.137909	0.151909	-0.231171	0.0539119			0.355	-0.411892	-0.206989	-0.049176	-0.134446	-0.0962655			0.355	-0.0720844	0.314813	0.364448	0.387357	0.359357
	0.356	0.0271854	0.134091	0.037367	-0.0568121	-0.439892			0.356	-0.0886293	0.131546	0.150636	-0.31135	0.0640934			0.356	-0.391529	-0.246443	-0.0568121	-0.144628	-0.073357			0.356	-0.0962655	0.318631	0.372084	0.420447	0.354267
	0.357	0.0386396	0.130273	0.0386396	-0.0822659	-0.423347			0.357	-0.089902	0.134091	0.16209	-0.31135	0.0526392			0.357	-0.383893	-0.248988	-0.049176	-0.1459	-0.0771751			0.357	-0.103902	0.324995	0.379721	0.51208	0.358085
	0.358	0.0284581	0.127728	0.0233674	-0.0835386	-0.430983			0.358	-0.0988109	0.135364	0.155727	-0.355894	0.0450031			0.358	-0.373712	-0.238807	-0.0186314	-0.149718	-0.049176			0.358	-0.115356	0.314813	0.373357	0.648258	0.363175
	0.359	0.0500939	0.125183	0.0348216	-0.086084	-0.430983			0.359	-0.105174	0.132819	0.164636	-0.352076	0.0386396			0.359	-0.357167	-0.203171	-0.0224495	-0.153536	-0.0415398			0.359	-0.120447	0.32754	0.383539	0.758982	0.36063
	0.36	0.0284581	0.12391	0.0437304	-0.0809932	-0.422074			0.36	-0.106447	0.122637	0.143	-0.381348	0.0450031			0.36	-0.35844	-0.248988	-0.00335912	-0.162445	-0.0377217			0.36	-0.11281	0.32754	0.375902	0.820071	0.342813
	0.361	0.0335489	0.120092	0.0488212	-0.0771751	-0.415711			0.361	-0.120447	0.122637	0.160818	-0.416983	0.0360943			0.361	-0.359712	-0.276987	0.00554971	-0.164991	-0.0249948			0.361	-0.138264	0.326267	0.369539	0.802253	0.323722
	0.362	0.0284581	0.113728	0.0488212	-0.0619029	-0.391529			0.362	-0.139537	0.103547	0.153182	-0.416983	0.0335489			0.362	-0.322804	-0.271897	0.0131859	-0.171354	0.0068224			0.362	-0.135719	0.316086	0.345358	0.81498	0.314813
	0.363	0.020822	0.121365	0.037367	-0.0593575	-0.381348			0.363	-0.122992	0.106092	0.144273	-0.414438	0.0271854			0.363	-0.343167	-0.298623	0.0526392	-0.171354	-0.00335912			0.363	-0.130628	0.302086	0.36063	0.785709	0.321177
	0.364	0.0348216	0.115001	0.020822	-0.0542667	-0.36353			0.364	-0.149718	0.0959107	0.168454	-0.321532	0.0170039			0.364	-0.335531	-0.271897	0.05773	-0.176445	0.0106405			0.364	-0.139537	0.303359	0.347903	0.755164	0.317359
	0.365	0.0144585	0.121365	-0.00335912	-0.0415398	-0.35844			0.365	-0.148446	0.0806384	0.151909	-0.288442	0.0335489			0.365	-0.329168	-0.280805	0.0348216	-0.1739	0.0170039			0.365	-0.115356	0.313541	0.326267	0.78189	0.312268
	0.366	0.020822	0.106092	-0.0517213	-0.0377217	-0.353349			0.366	-0.143355	0.05773	0.150636	-0.276987	0.0233674			0.366	-0.316441	-0.268079	0.0259127	-0.1599	0.0386396			0.366	-0.124265	0.310995	0.331358	0.752619	0.300814
	0.367	0.0170039	0.104819	-0.122992	-0.0249948	-0.345713			0.367	-0.149718	0.0220947	0.132819	-0.287169	0.0284581			0.367	-0.312623	-0.220989	0.0246401	-0.158627	0.0386396			0.367	-0.130628	0.304632	0.346631	0.7488	0.284269
	0.368	0.00554971	0.115001	-0.204444	-0.089902	-0.334258			0.368	-0.166263	0.0170039	0.135364	-0.275715	0.0195493			0.368	-0.302441	-0.196808	0.0526392	-0.150991	0.0475485			0.368	-0.11281	0.291905	0.322449	0.634258	0.288087
	0.369	-0.0109953	0.106092	-0.29226	-0.223534	-0.322804			0.369	-0.177718	0.0195493	0.144273	-0.264261	0.0106405			0.369	-0.320259	-0.182808	0.0399123	-0.180263	0.0717296			0.369	-0.115356	0.300814	0.331358	0.613895	0.25627
	0.37	-0.00844988	0.111183	-0.369894	-0.380075	-0.312623			0.37	-0.163718	0.00300433	0.140455	-0.240079	0.00554971			0.37	-0.29735	-0.170081	0.0195493	-0.150991	0.107365			0.37	-0.105174	0.290632	0.335176	0.537534	0.253724
	0.371	-0.0059045	0.104819	-0.447528	-0.526435	-0.306259			0.371	-0.185354	-0.0122679	0.137909	-0.252806	-0.00335912			0.371	-0.298623	-0.154809	0.0131859	-0.148446	0.116274			0.371	-0.108992	0.290632	0.332631	0.537534	0.247361
	0.372	-0.000813741	0.112456	-0.56207	-0.689339	-0.29735			0.372	-0.185354	-0.0237222	0.137909	-0.237534	0.020822			0.372	-0.308805	-0.136991	-0.0122679	-0.157355	0.122637			0.372	-0.106447	0.281723	0.332631	0.527353	0.239725
	0.373	-0.0135406	0.111183	-0.788609	-0.816608	-0.279533			0.373	-0.189172	-0.036449	0.135364	-0.240079	0.0106405			0.373	-0.317713	-0.133174	-0.0186314	-0.139537	0.136637			0.373	-0.0937201	0.282996	0.333904	0.506989	0.234634
	0.374	0.00427702	0.107365	-0.913332	-0.937513	-0.268079			0.374	-0.17899	-0.0389944	0.135364	-0.237534	0.00427702			0.374	-0.294805	-0.128083	-0.0211768	-0.144628	0.159545			0.374	-0.0886293	0.286814	0.331358	0.517171	0.212998
	0.375	-0.0275402	0.113728	-0.738974	-1.02915	-0.256624			0.375	-0.195535	-0.036449	0.127728	-0.231171	0.00809509			0.375	-0.303714	-0.114083	-0.0313583	-0.133174	0.158273			0.375	-0.073357	0.289359	0.32754	0.51208	0.206635
	0.376	-0.0148133	0.111183	-0.68043	-1.13351	-0.236261			0.376	-0.204444	-0.0517213	0.135364	-0.240079	0.00554971			0.376	-0.289714	-0.086084	-0.0122679	-0.125537	0.183726			0.376	-0.0580848	0.274087	0.331358	0.494263	0.204089
	0.377	-0.0224495	0.120092	-0.671521	-1.39695	-0.232443			0.377	-0.196808	-0.0517213	0.139182	-0.236261	0.00427702			0.377	-0.285896	-0.0580848	-0.00844988	-0.122992	0.188817			0.377	-0.0580848	0.25627	0.335176	0.448446	0.212998
	0.378	-0.0186314	0.106092	-0.62825	-1.69476	-0.218444			0.378	-0.194263	-0.0619029	0.150636	-0.224807	0.00554971			0.378	-0.287169	-0.0568121	-0.0109953	-0.11281	0.221907			0.378	-0.0580848	0.270269	0.326267	0.417901	0.187544
	0.379	-0.0224495	0.10991	-0.598978	-1.60822	-0.199353			0.379	-0.198081	-0.0606302	0.121365	-0.215898	-0.000813741			0.379	-0.299896	-0.0479033	0.0131859	-0.11281	0.211725			0.379	-0.0428125	0.238452	0.330086	0.415356	0.17609
	0.38	-0.0249948	0.115001	-0.551888	-1.40077	-0.196808			0.38	-0.205717	-0.0631755	0.150636	-0.228625	-0.0148133			0.38	-0.285896	-0.0211768	0.0157312	-0.0911747	0.237179			0.38	-0.0339037	0.246088	0.330086	0.379721	0.188817
	0.381	-0.0224495	0.113728	-0.523889	-1.36005	-0.180263			0.381	-0.224807	-0.0542667	0.135364	-0.255352	-0.00844988			0.381	-0.288442	-0.00463181	0.0259127	-0.069539	0.262633			0.381	-0.0249948	0.220634	0.344085	0.378448	0.160818
	0.382	-0.0300856	0.129001	-0.499708	-1.33332	-0.154809			0.382	-0.213353	-0.0555394	0.127728	-0.265533	-0.0173587			0.382	-0.287169	0.00173164	0.0526392	-0.0669936	0.268997			0.382	-0.00335912	0.206635	0.332631	0.375902	0.139182
	0.383	-0.0224495	0.130273	-0.48189	-1.31805	-0.148446			0.383	-0.217171	-0.036449	0.157	-0.219716	-0.00844988			0.383	-0.310077	-0.00208643	0.0640934	-0.0771751	0.263906			0.383	0.00300433	0.191362	0.351721	0.354267	0.139182
	0.384	-0.0262675	0.121365	-0.42971	-1.28496	-0.153536			0.384	-0.196808	-0.0313583	0.145546	-0.189172	0.000458949			0.384	-0.283351	0.0220947	0.0895472	-0.0568121	0.281723			0.384	0.0220947	0.182454	0.352994	0.346631	0.145546
	0.385	-0.0199041	0.116274	-0.400438	-1.23151	-0.119174			0.385	-0.206989	-0.0351764	0.141728	-0.164991	-0.0059045			0.385	-0.298623	0.0246401	0.094638	-0.0517213	0.310995			0.385	0.0233674	0.186272	0.336449	0.340267	0.146818
	0.386	-0.00972257	0.130273	-0.392802	-1.18951	-0.0988109			0.386	-0.227353	-0.0275402	0.151909	-0.14081	-0.00972257			0.386	-0.279533	0.0144585	0.134091	-0.0440852	0.310995			0.386	0.0399123	0.184999	0.32754	0.328813	0.17609
	0.387	-0.0186314	0.126455	-0.368621	-1.1386	-0.0797205			0.387	-0.228625	-0.0249948	0.134091	-0.110265	-0.0122679			0.387	-0.284623	0.0424577	0.130273	-0.032631	0.316086			0.387	0.0399123	0.201544	0.335176	0.322449	0.19009
	0.388	0.00173164	0.130273	-0.326622	-1.08133	-0.0708117			0.388	-0.210808	-0.0288129	0.137909	-0.073357	-0.000813741			0.388	-0.288442	0.00809509	0.107365	-0.0453579	0.342813			0.388	0.0640934	0.188817	0.350449	0.323722	0.167181
	0.389	-0.000813741	0.132819	-0.303714	-1.03424	-0.0479033			0.389	-0.215898	-0.0224495	0.135364	-0.0453579	-0.0237222			0.389	-0.288442	0.0068224	0.103547	-0.0288129	0.34154			0.389	0.0717296	0.188817	0.316086	0.310995	0.173545
	0.39	0.00936778	0.131546	-0.288442	-0.965512	-0.0555394			0.39	-0.223534	-0.0122679	0.129001	-0.0453579	-0.0339037			0.39	-0.283351	0.0106405	0.0933653	-0.0224495	0.359357			0.39	0.0793657	0.192635	0.331358	0.293178	0.160818
	0.391	0.00809509	0.130273	-0.256624	-0.903151	-0.0300856			0.391	-0.229898	-0.0262675	0.117546	-0.0199041	-0.0351764			0.391	-0.282078	-0.00208643	0.0755476	-0.0186314	0.364448			0.391	0.0831838	0.206635	0.319904	0.298268	0.149364
	0.392	0.0131859	0.135364	-0.236261	-0.847152	-0.0059045			0.392	-0.224807	-0.0173587	0.116274	-0.0288129	-0.0988109			0.392	-0.279533	-0.00844988	0.0819111	-0.0109953	0.382266			0.392	0.0971834	0.187544	0.313541	0.279178	0.160818
	0.393	0.0271854	0.130273	-0.218444	-0.794972	0.00809509			0.393	-0.224807	-0.0199041	0.10991	-0.032631	-0.14081			0.393	-0.298623	0.0119132	0.0895472	-0.0109953	0.388629			0.393	0.103547	0.191362	0.290632	0.282996	0.19009
	0.394	0.0220947	0.131546	-0.205717	-0.741519	0.0170039			0.394	-0.215898	-0.0173587	0.0959107	-0.0135406	-0.162445			0.394	-0.276987	-0.0148133	0.0882745	-0.00844988	0.384811			0.394	0.10991	0.195181	0.309723	0.270269	0.202817
	0.395	0.0233674	0.134091	-0.17899	-0.679157	0.0437304			0.395	-0.217171	-0.00208643	0.0933653	-0.0224495	-0.224807			0.395	-0.282078	0.00427702	0.0653661	-0.0059045	0.41281			0.395	0.113728	0.193908	0.305905	0.267724	0.244815
	0.396	0.0310035	0.141728	-0.167536	-0.634613	0.0488212			0.396	-0.220989	-0.0262675	0.104819	-0.00717719	-0.210808			0.396	-0.276987	-0.00844988	0.0755476	-0.00463181	0.420447			0.396	0.135364	0.181181	0.288087	0.270269	0.257542
	0.397	0.0284581	0.134091	-0.152264	-0.570979	0.061548			0.397	-0.234989	-0.0135406	0.0895472	-0.00972257	-0.177718			0.397	-0.266806	-0.0148133	0.0971834	0.0068224	0.419174			0.397	0.137909	0.183726	0.288087	0.251179	0.277905
	0.398	0.0360943	0.141728	-0.148446	-0.521344	0.0870019			0.398	-0.209535	-0.0199041	0.0831838	-0.00335912	-0.119174			0.398	-0.262988	-0.0186314	0.0971834	-0.000813741	0.415356			0.398	0.151909	0.198998	0.282996	0.229543	0.289359
	0.399	0.0284581	0.140455	-0.115356	-0.479345	0.0870019			0.399	-0.222262	-0.0211768	0.0844565	-0.0262675	-0.120447			0.399	-0.293532	-0.0186314	0.078093	0.00300433	0.401356			0.399	0.143	0.193908	0.253724	0.234634	0.293178
	0.4	0.0271854	0.125183	-0.103902	-0.442437	0.0959107			0.4	-0.22608	-0.0199041	0.094638	-0.0148133	-0.0822659			0.4	-0.25917	-0.0211768	0.0730023	0.0106405	0.406447			0.4	0.151909	0.174817	0.251179	0.205362	0.285541
	0.401	0.037367	0.130273	-0.089902	-0.414438	0.118819			0.401	-0.217171	-0.0237222	0.0908199	-0.0173587	-0.0784478			0.401	-0.265533	-0.016086	0.0653661	-0.00717719	0.379721			0.401	0.155727	0.168454	0.244815	0.214271	0.296996
	0.402	0.0437304	0.125183	-0.0873566	-0.364803	0.117546			0.402	-0.227353	-0.032631	0.0844565	-0.00717719	-0.052994			0.402	-0.276987	-0.0377217	0.0704569	-0.0122679	0.369539			0.402	0.136637	0.153182	0.240997	0.206635	0.282996
	0.403	0.0310035	0.121365	-0.073357	-0.32535	0.117546			0.403	-0.224807	-0.0224495	0.0730023	-0.0453579	-0.0224495			0.403	-0.27826	-0.0453579	0.061548	-0.0224495	0.332631			0.403	0.154454	0.145546	0.253724	0.186272	0.279178
	0.404	0.0271854	0.127728	-0.0580848	-0.294805	0.136637			0.404	-0.223534	-0.0186314	0.0882745	-0.0402671	-0.00335912			0.404	-0.271897	-0.0580848	0.0450031	-0.0148133	0.274087			0.404	0.153182	0.127728	0.224452	0.173545	0.257542
	0.405	0.0360943	0.118819	-0.069539	-0.261715	0.139182			0.405	-0.21208	-0.0275402	0.0640934	-0.0428125	0.0182766			0.405	-0.274442	-0.0453579	0.0399123	-0.0122679	0.237179			0.405	0.145546	0.12391	0.211725	0.154454	0.260088
	0.406	0.0488212	0.12391	-0.049176	-0.224807	0.145546			0.406	-0.222262	-0.0262675	0.0819111	-0.0440852	0.0170039			0.406	-0.269351	-0.0797205	0.0628207	-0.0122679	0.212998			0.406	0.130273	0.113728	0.20918	0.157	0.252451
	0.407	0.0475485	0.129001	-0.0288129	-0.194263	0.149364			0.407	-0.21208	-0.0351764	0.061548	-0.0479033	0.0246401			0.407	-0.265533	-0.0657209	0.061548	-0.0186314	0.239725			0.407	0.118819	0.0806384	0.204089	0.158273	0.247361
	0.408	0.0437304	0.134091	-0.0339037	-0.167536	0.140455			0.408	-0.208262	-0.0351764	0.05773	-0.0504486	0.0271854			0.408	-0.261715	-0.0720844	0.020822	-0.0249948	0.280451			0.408	0.116274	0.0895472	0.19009	0.148091	0.233361
	0.409	0.0348216	0.106092	-0.0199041	-0.1739	0.160818			0.409	-0.208262	-0.0275402	0.0526392	-0.0389944	0.0220947			0.409	-0.271897	-0.0797205	0.00809509	-0.0339037	0.322449			0.409	0.108638	0.0806384	0.170999	0.145546	0.230816
	0.41	0.0399123	0.130273	-0.0173587	-0.150991	0.170999			0.41	-0.215898	-0.0237222	0.0488212	-0.0199041	0.041185			0.41	-0.265533	-0.108992	-0.0288129	-0.0351764	0.336449			0.41	0.118819	0.0768203	0.158273	0.12391	0.20918
	0.411	0.0462758	0.117546	-0.00844988	-0.130628	0.182454			0.411	-0.206989	-0.0517213	0.0513665	-0.0237222	0.0500939			0.411	-0.264261	-0.0873566	-0.049176	-0.0288129	0.363175			0.411	0.104819	0.0526392	0.149364	0.108638	0.201544
	0.412	0.041185	0.134091	-0.0059045	-0.0975382	0.196453			0.412	-0.205717	-0.0339037	0.0360943	-0.0224495	0.0437304			0.412	-0.268079	-0.0988109	-0.0835386	-0.0313583	0.379721			0.412	0.0831838	0.0335489	0.112456	0.0920926	0.201544
	0.413	0.0424577	0.106092	-0.0199041	-0.0568121	0.221907			0.413	-0.204444	-0.0517213	0.0360943	-0.0288129	0.0386396			0.413	-0.257897	-0.103902	-0.0911747	-0.0377217	0.387357			0.413	0.0844565	0.0360943	0.120092	0.0717296	0.201544
	0.414	0.0386396	0.115001	-0.0148133	-0.0288129	0.235906			0.414	-0.199353	-0.0466306	0.0475485	-0.0249948	0.0360943			0.414	-0.261715	-0.133174	-0.0873566	-0.0428125	0.422992			0.414	0.0730023	-0.00335912	0.108638	0.0628207	0.179908
	0.415	0.037367	0.115001	-0.0135406	-0.0249948	0.237179			0.415	-0.199353	-0.0619029	0.0157312	-0.0237222	0.0386396			0.415	-0.251534	-0.114083	-0.0988109	-0.0377217	0.417901			0.415	0.0602754	0.00173164	0.0844565	0.0691842	0.17609
	0.416	0.0488212	0.102274	-0.00208643	0.000458949	0.243543			0.416	-0.186626	-0.0580848	0.0220947	-0.0186314	0.0437304			0.416	-0.276987	-0.12681	-0.100084	-0.0377217	0.435719			0.416	0.0488212	-0.00335912	0.0730023	0.0500939	0.165909
	0.417	0.0335489	0.104819	0.0068224	0.0119132	0.257542			0.417	-0.195535	-0.0619029	0.0182766	-0.0224495	0.00554971			0.417	-0.262988	-0.134446	-0.086084	-0.0377217	0.439537			0.417	0.0539119	-0.00208643	0.05773	0.0437304	0.164636
	0.418	0.0386396	0.106092	-0.00844988	0.0322762	0.251179			0.418	-0.196808	-0.052994	0.0233674	-0.0377217	0.0335489			0.418	-0.251534	-0.125537	-0.10772	-0.049176	0.456082			0.418	0.0335489	-0.00717719	0.041185	0.0399123	0.163363
	0.419	0.0437304	0.0933653	0.00173164	0.041185	0.258815			0.419	-0.19299	-0.0644482	0.0157312	-0.0415398	0.0220947			0.419	-0.238807	-0.1459	-0.110265	-0.0415398	0.463718			0.419	0.0360943	-0.0135406	0.0322762	0.0106405	0.139182
	0.42	0.0348216	0.125183	0.00427702	0.0679115	0.274087			0.42	-0.177718	-0.0631755	0.00554971	-0.032631	0.0220947			0.42	-0.255352	-0.131901	-0.106447	-0.0619029	0.4599			0.42	0.0246401	-0.032631	0.0284581	0.0131859	0.141728
	0.421	0.0246401	0.094638	0.00300433	0.0806384	0.271542			0.421	-0.191717	-0.0555394	0.0068224	-0.0402671	0.00809509			0.421	-0.247716	-0.156082	-0.117901	-0.0593575	0.454809			0.421	0.0335489	-0.032631	0.0233674	0.00300433	0.144273
	0.422	0.0310035	0.094638	0.00173164	0.103547	0.27536			0.422	-0.175172	-0.0708117	0.0182766	-0.049176	-0.00972257			0.422	-0.265533	-0.135719	-0.0949928	-0.0453579	0.461173			0.422	0.0233674	-0.0453579	0.0068224	0.00554971	0.129001
	0.423	0.0271854	0.0870019	0.00427702	0.106092	0.280451			0.423	-0.164991	-0.0580848	0.0119132	-0.0542667	-0.00463181			0.423	-0.255352	-0.150991	-0.0886293	-0.0555394	0.452264			0.423	0.00809509	-0.0440852	0.00936778	-0.00972257	0.135364
	0.424	0.0284581	0.0806384	0.00173164	0.132819	0.280451			0.424	-0.181536	-0.0593575	0.00300433	-0.0453579	0.0157312			0.424	-0.247716	-0.148446	-0.0822659	-0.049176	0.4459			0.424	0.00809509	-0.0517213	0.00936778	0.00427702	0.131546
	0.425	0.0259127	0.0844565	0.0144585	0.117546	0.288087			0.425	-0.175172	-0.069539	-0.00208643	-0.0415398	0.0182766			0.425	-0.237534	-0.1599	-0.0848113	-0.0657209	0.419174			0.425	0.0170039	-0.0593575	-0.0135406	-0.0224495	0.134091
	0.426	0.0119132	0.078093	0.0271854	0.113728	0.270269			0.426	-0.170081	-0.0657209	0.0131859	-0.052994	0.0310035			0.426	-0.223534	-0.163718	-0.0886293	-0.0835386	0.425537			0.426	0.0106405	-0.0619029	-0.00717719	-0.00717719	0.125183
	0.427	0.0170039	0.0793657	0.0233674	0.118819	0.285541			0.427	-0.1739	-0.069539	0.00300433	-0.0466306	0.0360943			0.427	-0.234989	-0.144628	-0.0949928	-0.10772	0.394993			0.427	0.00554971	-0.0631755	-0.0224495	-0.0211768	0.115001
	0.428	0.020822	0.0768203	0.0233674	0.125183	0.276633			0.428	-0.154809	-0.0606302	0.00809509	-0.0479033	0.0386396			0.428	-0.250261	-0.17899	-0.0937201	-0.086084	0.383539			0.428	0.00173164	-0.0644482	-0.0224495	-0.0211768	0.107365
	0.429	0.0182766	0.0895472	0.0386396	0.135364	0.280451			0.429	-0.154809	-0.0580848	0.00173164	-0.032631	0.0399123			0.429	-0.246443	-0.149718	-0.102629	-0.119174	0.358085			0.429	0.00809509	-0.0644482	-0.0313583	-0.0135406	0.116274
	0.43	0.0233674	0.0730023	0.0233674	0.153182	0.262633			0.43	-0.156082	-0.0619029	0.00427702	-0.0453579	0.0360943			0.43	-0.220989	-0.164991	-0.089902	-0.148446	0.342813			0.43	0.0170039	-0.0644482	-0.0300856	-0.0275402	0.112456
	0.431	0.0271854	0.0793657	0.0233674	0.155727	0.24227			0.431	-0.163718	-0.0631755	0.00173164	-0.0479033	0.0360943			0.431	-0.243897	-0.166263	-0.0962655	-0.150991	0.312268			0.431	0.00427702	-0.0759024	-0.0300856	-0.032631	0.0908199
	0.432	0.0233674	0.0819111	0.0220947	0.167181	0.220634			0.432	-0.149718	-0.0568121	-0.00844988	-0.0300856	0.041185			0.432	-0.206989	-0.158627	-0.089902	-0.164991	0.288087			0.432	0.0119132	-0.0759024	-0.0542667	-0.016086	0.094638
	0.433	0.0144585	0.0831838	0.0297308	0.158273	0.179908			0.433	-0.139537	-0.0568121	0.00300433	-0.0173587	0.0424577			0.433	-0.224807	-0.1599	-0.0924474	-0.180263	0.285541			0.433	0.0233674	-0.0593575	-0.0389944	-0.0466306	0.0895472
	0.434	0.0170039	0.0908199	0.0131859	0.145546	0.163363			0.434	-0.148446	-0.0593575	-0.00208643	-0.0186314	0.0131859			0.434	-0.218444	-0.154809	-0.101356	-0.184081	0.247361			0.434	0.0170039	-0.0835386	-0.0288129	-0.0173587	0.0933653
	0.435	0.0271854	0.074275	0.0233674	0.151909	0.151909			0.435	-0.143355	-0.0644482	-0.00335912	-0.0237222	0.0322762			0.435	-0.227353	-0.175172	-0.105174	-0.186626	0.266451			0.435	0.00554971	-0.073357	-0.0555394	-0.0415398	0.0933653
	0.436	0.0271854	0.0870019	0.0182766	0.16209	0.131546			0.436	-0.143355	-0.069539	-0.0199041	-0.0122679	0.0322762			0.436	-0.220989	-0.17899	-0.106447	-0.195535	0.248633			0.436	0.0106405	-0.0746297	-0.0746297	-0.0173587	0.0971834
	0.437	0.0220947	0.074275	0.0322762	0.179908	0.125183			0.437	-0.133174	-0.069539	0.000458949	-0.0148133	0.0259127			0.437	-0.217171	-0.167536	-0.0975382	-0.189172	0.22827			0.437	0.0322762	-0.0771751	-0.0580848	-0.0237222	0.0933653
	0.438	0.0131859	0.061548	0.0310035	0.181181	0.113728			0.438	-0.124265	-0.0593575	-0.00463181	-0.0122679	0.020822			0.438	-0.21208	-0.162445	-0.110265	-0.191717	0.233361			0.438	0.0271854	-0.0580848	-0.0453579	-0.0186314	0.0920926
	0.439	0.0233674	0.078093	0.037367	0.183726	0.121365			0.439	-0.136991	-0.0657209	0.00300433	-0.0186314	0.0259127			0.439	-0.220989	-0.170081	-0.108992	-0.182808	0.239725			0.439	0.0297308	-0.0708117	-0.049176	-0.0237222	0.0882745
	0.44	0.00936778	0.0628207	0.0271854	0.195181	0.111183			0.44	-0.135719	-0.0746297	-0.0148133	-0.0173587	0.0182766			0.44	-0.231171	-0.157355	-0.115356	-0.190444	0.24227			0.44	0.020822	-0.073357	-0.0428125	-0.036449	0.0806384
	0.441	0.0259127	0.061548	0.0233674	0.211725	0.104819			0.441	-0.128083	-0.0568121	-0.0135406	-0.0275402	0.0170039			0.441	-0.195535	-0.1599	-0.122992	-0.196808	0.251179			0.441	0.0170039	-0.069539	-0.049176	-0.0389944	0.103547
	0.442	0.0233674	0.0704569	0.0386396	0.202817	0.118819			0.442	-0.115356	-0.0555394	-0.00844988	-0.0237222	0.00427702			0.442	-0.199353	-0.175172	-0.111538	-0.177718	0.265178			0.442	0.0297308	-0.0708117	-0.0440852	-0.0339037	0.0895472
	0.443	0.00300433	0.0513665	0.0437304	0.214271	0.113728			0.443	-0.119174	-0.069539	0.00936778	-0.0237222	0.00554971			0.443	-0.205717	-0.167536	-0.111538	-0.180263	0.276633			0.443	0.0182766	-0.0771751	-0.0644482	-0.0224495	0.0971834
	0.444	0.0220947	0.0730023	0.0475485	0.220634	0.113728			0.444	-0.124265	-0.0542667	0.0119132	-0.0351764	0.00173164			0.444	-0.194263	-0.175172	-0.110265	-0.162445	0.29445			0.444	0.0271854	-0.0708117	-0.0262675	-0.0237222	0.0920926
	0.445	0.0195493	0.078093	0.0360943	0.235906	0.129001			0.445	-0.114083	-0.052994	-0.00717719	-0.0313583	0.00809509			0.445	-0.214626	-0.158627	-0.122992	-0.158627	0.288087			0.445	0.0310035	-0.0555394	-0.0415398	-0.0275402	0.0870019
	0.446	0.0144585	0.0590027	0.0437304	0.237179	0.137909			0.446	-0.108992	-0.052994	0.00936778	-0.032631	0.0119132			0.446	-0.210808	-0.157355	-0.125537	-0.148446	0.291905			0.446	0.0233674	-0.0797205	-0.0415398	-0.0199041	0.107365
	0.447	0.0182766	0.0628207	0.0551846	0.237179	0.149364			0.447	-0.111538	-0.0466306	0.0131859	-0.0224495	0.0259127			0.447	-0.186626	-0.168809	-0.116628	-0.133174	0.314813			0.447	0.0424577	-0.0555394	-0.0389944	-0.0122679	0.101001
	0.448	0.0182766	0.0704569	0.0564573	0.235906	0.151909			0.448	-0.116628	-0.049176	0.00173164	-0.0288129	0.0513665			0.448	-0.185354	-0.156082	-0.115356	-0.114083	0.318631			0.448	0.0462758	-0.0593575	-0.0300856	-0.0109953	0.116274
	0.449	0.0246401	0.0704569	0.0564573	0.24227	0.173545			0.449	-0.114083	-0.0580848	0.0170039	-0.0262675	0.037367			0.449	-0.199353	-0.161173	-0.114083	-0.12681	0.333904			0.449	0.0488212	-0.0466306	-0.0351764	-0.016086	0.120092
	0.45	0.00936778	0.0679115	0.0590027	0.26136	0.186272			0.45	-0.110265	-0.0402671	0.00300433	-0.0224495	0.0462758			0.45	-0.203171	-0.171354	-0.12681	-0.119174	0.333904			0.45	0.0424577	-0.0479033	-0.0428125	-0.0249948	0.108638
	0.451	0.0360943	0.0691842	0.0653661	0.258815	0.191362			0.451	-0.108992	-0.0504486	0.0119132	-0.0173587	0.0500939			0.451	-0.190444	-0.164991	-0.116628	-0.111538	0.350449			0.451	0.0360943	-0.0440852	-0.0402671	-0.00844988	0.115001
	0.452	0.0195493	0.0755476	0.0768203	0.263906	0.205362			0.452	-0.100084	-0.0504486	0.0170039	-0.0262675	0.0564573			0.452	-0.195535	-0.158627	-0.105174	-0.105174	0.369539			0.452	0.0462758	-0.0517213	-0.0135406	0.00300433	0.125183
	0.453	0.00936778	0.0691842	0.0717296	0.285541	0.212998			0.453	-0.102629	-0.0517213	0.00809509	0.00300433	0.0437304			0.453	-0.186626	-0.149718	-0.138264	-0.0644482	0.386084			0.453	0.0551846	-0.0440852	-0.0211768	-0.00335912	0.107365
	0.454	0.0246401	0.0628207	0.0793657	0.277905	0.229543			0.454	-0.0949928	-0.0555394	0.0195493	-0.00844988	0.0310035			0.454	-0.177718	-0.161173	-0.124265	-0.0937201	0.402629			0.454	0.05773	-0.0479033	-0.0173587	0.00809509	0.103547
	0.455	0.020822	0.0831838	0.0628207	0.304632	0.252451			0.455	-0.0848113	-0.0377217	0.00427702	-0.00208643	0.0386396			0.455	-0.200626	-0.154809	-0.120447	-0.0873566	0.40772			0.455	0.0526392	-0.0415398	-0.0059045	0.0157312	0.102274
	0.456	0.0170039	0.0691842	0.0755476	0.303359	0.276633			0.456	-0.0848113	-0.032631	0.0195493	0.020822	0.0322762			0.456	-0.189172	-0.156082	-0.152264	-0.0835386	0.386084			0.456	0.0666388	-0.0428125	-0.00463181	-0.00208643	0.120092
	0.457	0.0068224	0.0704569	0.0730023	0.309723	0.271542			0.457	-0.0924474	-0.0466306	0.00554971	0.0106405	0.0170039			0.457	-0.196808	-0.147173	-0.131901	-0.0809932	0.41281			0.457	0.0704569	-0.0351764	-0.0173587	-0.0109953	0.120092
	0.458	0.0195493	0.0691842	0.0831838	0.30845	0.298268			0.458	-0.100084	-0.0186314	0.0131859	0.0131859	0.0424577			0.458	-0.185354	-0.152264	-0.149718	-0.0644482	0.422992			0.458	0.0628207	-0.0237222	-0.00208643	0.0195493	0.141728
	0.459	0.0182766	0.0793657	0.074275	0.313541	0.321177			0.459	-0.073357	-0.0402671	0.00809509	0.0182766	0.0437304			0.459	-0.189172	-0.1459	-0.12681	-0.052994	0.448446			0.459	0.0691842	-0.0313583	-0.0122679	0.0144585	0.126455
	0.46	0.0170039	0.0819111	0.078093	0.333904	0.322449			0.46	-0.0949928	-0.0377217	0.0271854	0.0233674	0.0284581			0.46	-0.199353	-0.139537	-0.135719	-0.0466306	0.429355			0.46	0.0653661	-0.0224495	-0.00844988	0.0106405	0.135364
	0.461	0.020822	0.0920926	0.0819111	0.332631	0.331358			0.461	-0.0886293	-0.0224495	0.0131859	-0.00208643	0.0360943			0.461	-0.201899	-0.152264	-0.138264	-0.0517213	0.453537			0.461	0.0640934	-0.0351764	0.0157312	0.0170039	0.126455
	0.462	0.0131859	0.0691842	0.0870019	0.344085	0.350449			0.462	-0.089902	-0.0313583	0.0220947	0.0119132	0.0220947			0.462	-0.200626	-0.139537	-0.143355	-0.0351764	0.464991			0.462	0.0704569	-0.00972257	0.000458949	0.0144585	0.130273
	0.463	0.0106405	0.074275	0.0882745	0.340267	0.358085			0.463	-0.0771751	-0.0313583	0.0233674	0.0170039	0.0284581			0.463	-0.214626	-0.133174	-0.131901	-0.032631	0.456082			0.463	0.0691842	-0.0288129	0.00300433	0.0182766	0.153182
	0.464	0.0310035	0.0857292	0.0984561	0.363175	0.359357			0.464	-0.073357	-0.032631	0.020822	0.0182766	0.0335489			0.464	-0.209535	-0.143355	-0.147173	-0.0402671	0.4459			0.464	0.0717296	-0.0173587	0.00936778	0.0360943	0.145546
	0.465	0.0131859	0.0768203	0.102274	0.347903	0.368266			0.465	-0.0784478	-0.036449	0.0310035	-0.000813741	0.0271854			0.465	-0.200626	-0.12681	-0.139537	-0.0453579	0.4599			0.465	0.0590027	-0.00844988	0.0119132	0.0157312	0.150636
	0.466	0.0106405	0.078093	0.0908199	0.359357	0.370812			0.466	-0.0835386	-0.0313583	0.0259127	0.0131859	0.0284581			0.466	-0.223534	-0.154809	-0.14081	-0.0389944	0.457355			0.466	0.0831838	-0.016086	0.020822	0.0233674	0.150636
	0.467	0.0170039	0.0882745	0.0971834	0.36063	0.375902			0.467	-0.0746297	-0.0135406	0.0233674	0.0068224	0.0526392			0.467	-0.200626	-0.144628	-0.131901	-0.0593575	0.501899			0.467	0.0831838	-0.0186314	0.0297308	0.0322762	0.145546
	0.468	0.0195493	0.0793657	0.0997288	0.359357	0.383539			0.468	-0.073357	-0.0173587	0.0335489	0.0106405	0.061548			0.468	-0.201899	-0.153536	-0.135719	-0.052994	0.462445			0.468	0.0793657	-0.000813741	0.0144585	0.0360943	0.154454
	0.469	0.0170039	0.0819111	0.0908199	0.363175	0.389902			0.469	-0.0580848	-0.0173587	0.0233674	0.0170039	0.074275			0.469	-0.205717	-0.124265	-0.134446	-0.0517213	0.450991			0.469	0.0882745	-0.00972257	0.0259127	0.0310035	0.169727
	0.47	0.020822	0.0844565	0.0971834	0.37463	0.400083			0.47	-0.0682663	-0.0300856	0.0437304	0.0271854	0.074275			0.47	-0.200626	-0.130628	-0.139537	-0.0759024	0.449718			0.47	0.078093	-0.0135406	0.0322762	0.0233674	0.172272
	0.471	0.0144585	0.0870019	0.104819	0.370812	0.391175			0.471	-0.0720844	-0.032631	0.0297308	0.020822	0.0653661			0.471	-0.201899	-0.14081	-0.136991	-0.0606302	0.425537			0.471	0.0793657	0.000458949	0.0284581	0.0322762	0.170999
	0.472	0.0284581	0.0831838	0.106092	0.375902	0.405174			0.472	-0.0415398	-0.0275402	0.0322762	0.0144585	0.0882745			0.472	-0.196808	-0.138264	-0.124265	-0.086084	0.403902			0.472	0.074275	0.0131859	0.0322762	0.0386396	0.173545
	0.473	0.0271854	0.0730023	0.0984561	0.354267	0.398811			0.473	-0.0631755	-0.0109953	0.041185	0.0271854	0.0870019			0.473	-0.214626	-0.150991	-0.128083	-0.069539	0.389902			0.473	0.078093	0.00300433	0.0297308	0.0488212	0.19009
	0.474	0.0233674	0.0730023	0.113728	0.349176	0.403902			0.474	-0.0568121	-0.0237222	0.0399123	0.0284581	0.0971834			0.474	-0.194263	-0.134446	-0.108992	-0.086084	0.379721			0.474	0.0831838	0.00809509	0.0246401	0.0526392	0.186272
	0.475	0.0233674	0.0844565	0.102274	0.358085	0.39372			0.475	-0.052994	-0.0173587	0.0259127	0.0399123	0.074275			0.475	-0.201899	-0.157355	-0.124265	-0.0949928	0.361903			0.475	0.0679115	0.00173164	0.0220947	0.0488212	0.17609
	0.476	0.020822	0.0793657	0.102274	0.352994	0.41281			0.476	-0.049176	-0.0135406	0.0424577	0.0284581	0.0768203			0.476	-0.220989	-0.154809	-0.111538	-0.110265	0.37463			0.476	0.0717296	-0.00208643	0.0399123	0.0564573	0.167181
	0.477	0.0182766	0.078093	0.103547	0.350449	0.41281			0.477	-0.0479033	-0.00208643	0.037367	0.0271854	0.0628207			0.477	-0.209535	-0.152264	-0.134446	-0.106447	0.351721			0.477	0.0831838	0.0119132	0.0475485	0.041185	0.172272
	0.478	0.0195493	0.0870019	0.104819	0.338994	0.402629			0.478	-0.0466306	-0.00208643	0.0399123	0.0348216	0.0628207			0.478	-0.194263	-0.138264	-0.121719	-0.117901	0.363175			0.478	0.0895472	0.0233674	0.0386396	0.0590027	0.184999
	0.479	0.0106405	0.0831838	0.0997288	0.354267	0.40772			0.479	-0.0415398	-0.0135406	0.0271854	0.0335489	0.0679115			0.479	-0.185354	-0.153536	-0.114083	-0.115356	0.373357			0.479	0.0691842	-0.0122679	0.0424577	0.05773	0.172272
	0.48	0.0284581	0.0844565	0.103547	0.344085	0.410265			0.48	-0.0517213	-0.016086	0.0475485	0.0590027	0.05773			0.48	-0.217171	-0.1459	-0.0962655	-0.124265	0.379721			0.48	0.0882745	0.00936778	0.0513665	0.0551846	0.192635
	0.481	0.0246401	0.0730023	0.10991	0.356812	0.422992			0.481	-0.0440852	-0.0109953	0.0335489	0.0360943	0.0666388			0.481	-0.21208	-0.154809	-0.119174	-0.114083	0.373357			0.481	0.0857292	0.0271854	0.0500939	0.0526392	0.182454
	0.482	0.0259127	0.074275	0.0997288	0.364448	0.420447			0.482	-0.0300856	-0.0135406	0.0284581	0.0386396	0.0500939			0.482	-0.203171	-0.142082	-0.116628	-0.122992	0.386084			0.482	0.0997288	0.0284581	0.0462758	0.0590027	0.178636
	0.483	0.0246401	0.0857292	0.0984561	0.364448	0.428083			0.483	-0.0402671	-0.00844988	0.0475485	0.0386396	0.074275			0.483	-0.209535	-0.154809	-0.10772	-0.106447	0.391175			0.483	0.0870019	0.0131859	0.0551846	0.0628207	0.169727
	0.484	0.0182766	0.0819111	0.106092	0.345358	0.434446			0.484	-0.0300856	-0.016086	0.0335489	0.0271854	0.0640934			0.484	-0.195535	-0.147173	-0.115356	-0.120447	0.396265			0.484	0.0844565	0.0335489	0.0475485	0.0640934	0.195181
	0.485	0.020822	0.0844565	0.122637	0.36063	0.424265			0.485	-0.0224495	-0.00463181	0.0462758	0.0386396	0.0590027			0.485	-0.206989	-0.153536	-0.121719	-0.120447	0.391175			0.485	0.0755476	0.0170039	0.0399123	0.0602754	0.206635
	0.486	0.0271854	0.078093	0.108638	0.352994	0.422992			0.486	-0.0377217	0.00173164	0.041185	0.0360943	0.0653661			0.486	-0.204444	-0.135719	-0.103902	-0.120447	0.401356			0.486	0.0997288	0.0182766	0.0500939	0.0691842	0.179908
	0.487	0.0157312	0.0806384	0.117546	0.346631	0.431901			0.487	-0.0313583	-0.00972257	0.0500939	0.0284581	0.0793657			0.487	-0.208262	-0.1459	-0.114083	-0.121719	0.40772			0.487	0.0793657	0.0360943	0.0539119	0.0679115	0.202817
	0.488	0.0233674	0.0870019	0.108638	0.36063	0.431901			0.488	-0.0211768	0.000458949	0.0437304	0.041185	0.0755476			0.488	-0.217171	-0.121719	-0.117901	-0.106447	0.408992			0.488	0.0908199	0.0233674	0.0602754	0.0551846	0.202817
	0.489	0.0106405	0.0844565	0.122637	0.372084	0.430628			0.489	-0.0237222	-0.0173587	0.0526392	0.0386396	0.0717296			0.489	-0.196808	-0.133174	-0.11281	-0.129355	0.402629			0.489	0.0831838	0.0259127	0.0564573	0.0640934	0.214271
	0.49	0.0195493	0.0768203	0.118819	0.369539	0.439537			0.49	-0.0262675	-0.0059045	0.0399123	0.0284581	0.108638			0.49	-0.201899	-0.150991	-0.121719	-0.130628	0.414083			0.49	0.0857292	0.0360943	0.0691842	0.061548	0.207907
	0.491	0.0131859	0.078093	0.120092	0.36063	0.435719			0.491	-0.0249948	0.00936778	0.0513665	0.0271854	0.094638			0.491	-0.206989	-0.166263	-0.128083	-0.129355	0.410265			0.491	0.0857292	0.0284581	0.0755476	0.0679115	0.205362
	0.492	0.0399123	0.0793657	0.130273	0.369539	0.447173			0.492	-0.0224495	0.00809509	0.0539119	0.0450031	0.0844565			0.492	-0.208262	-0.163718	-0.12681	-0.130628	0.416629			0.492	0.103547	0.0195493	0.0526392	0.0844565	0.186272
	0.493	0.0144585	0.0831838	0.113728	0.364448	0.44081			0.493	-0.00844988	0.00554971	0.0488212	0.0335489	0.0844565			0.493	-0.198081	-0.161173	-0.14081	-0.152264	0.430628			0.493	0.0844565	0.0195493	0.0488212	0.0971834	0.197726
	0.494	0.0220947	0.0882745	0.115001	0.377175	0.449718			0.494	-0.016086	-0.0109953	0.0462758	0.0488212	0.094638			0.494	-0.214626	-0.185354	-0.125537	-0.143355	0.428083			0.494	0.0882745	0.0348216	0.0386396	0.0704569	0.210453
	0.495	0.0271854	0.0908199	0.130273	0.37463	0.438264			0.495	-0.0109953	0.00300433	0.0424577	0.0348216	0.0971834			0.495	-0.208262	-0.171354	-0.147173	-0.1459	0.431901			0.495	0.0870019	0.0335489	0.0704569	0.0717296	0.193908
	0.496	0.0259127	0.094638	0.126455	0.373357	0.452264			0.496	-0.016086	0.00554971	0.0437304	0.0539119	0.0984561			0.496	-0.209535	-0.134446	-0.124265	-0.166263	0.410265			0.496	0.0920926	0.0450031	0.0602754	0.0666388	0.196453
	0.497	0.0131859	0.0870019	0.121365	0.377175	0.461173			0.497	-0.00335912	0.0170039	0.0513665	0.0462758	0.0908199			0.497	-0.219716	-0.142082	-0.1599	-0.150991	0.433173			0.497	0.0984561	0.0424577	0.0590027	0.078093	0.216816
	0.498	0.0271854	0.0895472	0.120092	0.373357	0.463718			0.498	-0.0148133	-0.00463181	0.0462758	0.0462758	0.0806384			0.498	-0.215898	-0.136991	-0.130628	-0.133174	0.419174			0.498	0.0870019	0.0437304	0.061548	0.0666388	0.212998
	0.499	0.0182766	0.0831838	0.122637	0.375902	0.476445			0.499	-0.0135406	0.00173164	0.037367	0.0513665	0.0933653			0.499	-0.213353	-0.125537	-0.130628	-0.1599	0.430628			0.499	0.0895472	0.0437304	0.0691842	0.0793657	0.212998
	0.5	0.0310035	0.0793657	0.127728	0.39372	0.470081			0.5	0.00300433	0.00936778	0.0462758	0.0602754	0.0920926			0.5	-0.222262	-0.114083	-0.105174	-0.14081	0.44081			0.5	0.0819111	0.041185	0.0704569	0.0806384	0.220634
	0.501	0.0297308	0.0895472	0.131546	0.386084	0.47899			0.501	-0.00972257	0.0119132	0.05773	0.05773	0.0691842			0.501	-0.214626	-0.130628	-0.106447	-0.130628	0.420447			0.501	0.0882745	0.0335489	0.0653661	0.0984561	0.219362
	0.502	0.0246401	0.078093	0.125183	0.391175	0.47899			0.502	0.00300433	0.00173164	0.0475485	0.0590027	0.0704569			0.502	-0.220989	-0.133174	-0.0962655	-0.14081	0.433173			0.502	0.0933653	0.0322762	0.0679115	0.0819111	0.196453
	0.503	0.0284581	0.0844565	0.120092	0.397538	0.477718			0.503	-0.0173587	0.00173164	0.0488212	0.0513665	0.0730023			0.503	-0.232443	-0.120447	-0.086084	-0.133174	0.433173			0.503	0.078093	0.0424577	0.0691842	0.0895472	0.226998
	0.504	0.0284581	0.0831838	0.125183	0.394993	0.486626			0.504	-0.0122679	0.0220947	0.0437304	0.0488212	0.0844565			0.504	-0.218444	-0.128083	-0.105174	-0.129355	0.419174			0.504	0.107365	0.0450031	0.0691842	0.0819111	0.218089
	0.505	0.0360943	0.0997288	0.131546	0.402629	0.495535			0.505	0.00554971	0.0119132	0.037367	0.0526392	0.0882745			0.505	-0.209535	-0.121719	-0.101356	-0.124265	0.424265			0.505	0.104819	0.0399123	0.0755476	0.0895472	0.210453
	0.506	0.0233674	0.0844565	0.117546	0.410265	0.489172			0.506	0.0119132	0.0195493	0.0539119	0.0564573	0.0895472			0.506	-0.222262	-0.124265	-0.0937201	-0.131901	0.424265			0.506	0.102274	0.0450031	0.0895472	0.0844565	0.219362
	0.507	0.0233674	0.0882745	0.129001	0.405174	0.498081			0.507	-0.00463181	0.0131859	0.0475485	0.061548	0.0895472			0.507	-0.227353	-0.131901	-0.089902	-0.143355	0.430628			0.507	0.0882745	0.0488212	0.0793657	0.0831838	0.201544
	0.508	0.0348216	0.0908199	0.12391	0.40772	0.510807			0.508	-0.00208643	0.0157312	0.0564573	0.0564573	0.094638			0.508	-0.222262	-0.138264	-0.0988109	-0.138264	0.420447			0.508	0.101001	0.0730023	0.0717296	0.0857292	0.220634
	0.509	0.0259127	0.0908199	0.132819	0.403902	0.506989			0.509	0.00427702	0.0068224	0.0539119	0.041185	0.0933653			0.509	-0.231171	-0.136991	-0.0771751	-0.139537	0.411538			0.509	0.0984561	0.0424577	0.0666388	0.0933653	0.216816
	0.51	0.0144585	0.0755476	0.134091	0.410265	0.496808			0.51	-0.00208643	0.0131859	0.0500939	0.0500939	0.0997288			0.51	-0.229898	-0.136991	-0.073357	-0.130628	0.403902			0.51	0.0997288	0.0500939	0.0653661	0.0997288	0.216816
	0.511	0.0246401	0.0870019	0.126455	0.411538	0.523534			0.511	0.00809509	0.0119132	0.0475485	0.0628207	0.0971834			0.511	-0.206989	-0.139537	-0.0797205	-0.11281	0.41281			0.511	0.0959107	0.0437304	0.0691842	0.0793657	0.239725
	0.512	0.0297308	0.0857292	0.131546	0.417901	0.522262			0.512	0.00427702	0.0157312	0.0666388	0.0526392	0.0959107			0.512	-0.222262	-0.1459	-0.0835386	-0.128083	0.410265			0.512	0.107365	0.0513665	0.0844565	0.101001	0.22318
	0.513	0.0284581	0.0844565	0.129001	0.420447	0.506989			0.513	0.0246401	0.0195493	0.0526392	0.0475485	0.0971834			0.513	-0.204444	-0.143355	-0.0937201	-0.116628	0.398811			0.513	0.0857292	0.0450031	0.074275	0.0895472	0.239725
	0.514	0.0297308	0.074275	0.130273	0.420447	0.523534			0.514	0.0068224	0.0144585	0.0640934	0.0488212	0.0997288			0.514	-0.222262	-0.138264	-0.0873566	-0.129355	0.415356			0.514	0.0959107	0.0526392	0.078093	0.102274	0.201544
	0.515	0.0119132	0.0870019	0.132819	0.410265	0.514626			0.515	-0.000813741	0.0068224	0.0488212	0.0590027	0.104819			0.515	-0.227353	-0.130628	-0.0771751	-0.119174	0.397538			0.515	0.102274	0.0590027	0.0564573	0.094638	0.22827
	0.516	0.0246401	0.0793657	0.134091	0.421719	0.515898			0.516	0.00554971	0.00809509	0.0539119	0.0526392	0.108638			0.516	-0.238807	-0.121719	-0.0784478	-0.116628	0.387357			0.516	0.10991	0.0500939	0.0882745	0.0819111	0.215543
	0.517	0.0271854	0.0831838	0.135364	0.422992	0.532443			0.517	0.0233674	0.0195493	0.0386396	0.0500939	0.0971834			0.517	-0.21208	-0.139537	-0.086084	-0.0848113	0.378448			0.517	0.10991	0.0666388	0.0653661	0.0920926	0.224452
	0.518	0.0322762	0.0857292	0.137909	0.415356	0.523534			0.518	0.0119132	0.0119132	0.0513665	0.0628207	0.103547			0.518	-0.218444	-0.122992	-0.100084	-0.111538	0.394993			0.518	0.108638	0.0551846	0.0882745	0.0908199	0.221907
	0.519	0.0335489	0.0882745	0.137909	0.430628	0.524807			0.519	0.0144585	0.0284581	0.0539119	0.0640934	0.103547			0.519	-0.227353	-0.129355	-0.0962655	-0.0988109	0.392447			0.519	0.108638	0.0513665	0.0844565	0.0870019	0.230816
	0.52	0.020822	0.0908199	0.131546	0.438264	0.536261			0.52	0.00173164	0.00554971	0.0666388	0.05773	0.0971834			0.52	-0.22608	-0.130628	-0.0873566	-0.0975382	0.373357			0.52	0.0920926	0.061548	0.0730023	0.0908199	0.224452
	0.521	0.0386396	0.104819	0.137909	0.424265	0.52608			0.521	0.0182766	0.0195493	0.0526392	0.0564573	0.0997288			0.521	-0.213353	-0.129355	-0.089902	-0.100084	0.380993			0.521	0.115001	0.061548	0.0933653	0.117546	0.232089
	0.522	0.0310035	0.0870019	0.141728	0.42681	0.529898			0.522	0.0233674	0.0335489	0.0513665	0.074275	0.0882745			0.522	-0.215898	-0.119174	-0.106447	-0.086084	0.37463			0.522	0.115001	0.0628207	0.0882745	0.0933653	0.235906
	0.523	0.0360943	0.0831838	0.141728	0.425537	0.536261			0.523	0.0144585	0.0144585	0.0513665	0.05773	0.094638			0.523	-0.228625	-0.120447	-0.0924474	-0.0835386	0.364448			0.523	0.101001	0.0500939	0.0895472	0.0984561	0.215543
	0.524	0.0310035	0.0920926	0.130273	0.429355	0.528625			0.524	0.0182766	0.0182766	0.0590027	0.0628207	0.0908199			0.524	-0.240079	-0.111538	-0.10772	-0.0835386	0.364448			0.524	0.0971834	0.0526392	0.0844565	0.0959107	0.234634
	0.525	0.0335489	0.0895472	0.134091	0.442082	0.527353			0.525	0.0246401	0.0271854	0.0590027	0.0653661	0.0908199			0.525	-0.208262	-0.120447	-0.108992	-0.0937201	0.380993			0.525	0.112456	0.0564573	0.0844565	0.0959107	0.234634
	0.526	0.0195493	0.0806384	0.126455	0.433173	0.504444			0.526	0.0131859	0.0348216	0.0386396	0.0628207	0.0882745			0.526	-0.219716	-0.122992	-0.11281	-0.0873566	0.351721			0.526	0.102274	0.0526392	0.0908199	0.104819	0.234634
	0.527	0.0220947	0.0755476	0.125183	0.443355	0.496808			0.527	0.00936778	0.0144585	0.05773	0.0602754	0.0933653			0.527	-0.220989	-0.120447	-0.100084	-0.0949928	0.361903			0.527	0.10991	0.0793657	0.0704569	0.115001	0.219362
	0.528	0.0322762	0.0895472	0.125183	0.435719	0.464991			0.528	0.0399123	0.020822	0.0640934	0.0602754	0.0984561			0.528	-0.208262	-0.124265	-0.111538	-0.101356	0.349176			0.528	0.108638	0.0755476	0.0768203	0.112456	0.24227
	0.529	0.0284581	0.074275	0.125183	0.442082	0.435719			0.529	0.0068224	0.0259127	0.0539119	0.0679115	0.0882745			0.529	-0.227353	-0.117901	-0.114083	-0.102629	0.344085			0.529	0.0971834	0.0628207	0.0933653	0.0920926	0.214271
	0.53	0.0360943	0.0768203	0.12391	0.4459	0.40772			0.53	0.0284581	0.0284581	0.0653661	0.0691842	0.113728			0.53	-0.223534	-0.162445	-0.106447	-0.111538	0.344085			0.53	0.108638	0.0666388	0.0908199	0.0959107	0.232089
	0.531	0.0386396	0.0730023	0.126455	0.439537	0.388629			0.531	0.0259127	0.0297308	0.061548	0.0551846	0.10991			0.531	-0.204444	-0.153536	-0.11281	-0.136991	0.326267			0.531	0.117546	0.0590027	0.0882745	0.108638	0.249906
	0.532	0.0284581	0.0768203	0.12391	0.434446	0.351721			0.532	0.020822	0.0246401	0.0500939	0.0526392	0.108638			0.532	-0.22608	-0.177718	-0.111538	-0.149718	0.330086			0.532	0.104819	0.0704569	0.094638	0.0933653	0.235906
	0.533	0.0259127	0.0730023	0.130273	0.429355	0.307177			0.533	0.0119132	0.0106405	0.0539119	0.0691842	0.117546			0.533	-0.224807	-0.162445	-0.0962655	-0.164991	0.305905			0.533	0.111183	0.0768203	0.0806384	0.106092	0.238452
	0.534	0.0220947	0.074275	0.125183	0.438264	0.29445			0.534	0.0335489	0.0246401	0.0513665	0.05773	0.120092			0.534	-0.232443	-0.121719	-0.110265	-0.199353	0.298268			0.534	0.117546	0.0602754	0.0806384	0.10991	0.225725
	0.535	0.0360943	0.0691842	0.127728	0.421719	0.25627			0.535	0.0233674	0.0284581	0.0564573	0.0526392	0.120092			0.535	-0.220989	-0.114083	-0.11281	-0.21208	0.286814			0.535	0.107365	0.074275	0.0857292	0.103547	0.22827
	0.536	0.0259127	0.0640934	0.120092	0.417901	0.235906			0.536	0.0182766	0.0144585	0.0539119	0.0488212	0.106092			0.536	-0.201899	-0.147173	-0.117901	-0.261715	0.257542			0.536	0.0971834	0.0500939	0.0933653	0.115001	0.232089
	0.537	0.0220947	0.0590027	0.131546	0.429355	0.20918			0.537	0.0271854	0.0220947	0.0590027	0.0602754	0.111183			0.537	-0.217171	-0.122992	-0.119174	-0.273169	0.233361			0.537	0.102274	0.0666388	0.0984561	0.0870019	0.225725
	0.538	0.0220947	0.0564573	0.117546	0.410265	0.169727			0.538	0.0335489	0.0119132	0.0590027	0.0590027	0.111183			0.538	-0.218444	-0.129355	-0.108992	-0.298623	0.215543			0.538	0.103547	0.0768203	0.0895472	0.102274	0.252451
	0.539	0.0233674	0.0602754	0.122637	0.40772	0.150636			0.539	0.0170039	0.0182766	0.0462758	0.0768203	0.113728			0.539	-0.206989	-0.120447	-0.117901	-0.31135	0.201544			0.539	0.118819	0.0602754	0.0933653	0.10991	0.232089
	0.54	0.020822	0.0793657	0.111183	0.392447	0.131546			0.54	0.0170039	0.0246401	0.0500939	0.0666388	0.102274			0.54	-0.215898	-0.130628	-0.103902	-0.329168	0.158273			0.54	0.103547	0.0730023	0.104819	0.10991	0.235906
	0.541	0.0246401	0.0590027	0.106092	0.386084	0.108638			0.541	0.0271854	0.0271854	0.078093	0.05773	0.108638			0.541	-0.213353	-0.135719	-0.114083	-0.346985	0.137909			0.541	0.120092	0.0819111	0.101001	0.094638	0.229543
	0.542	0.0195493	0.0526392	0.127728	0.391175	0.0755476			0.542	0.0170039	0.0233674	0.061548	0.0679115	0.0959107			0.542	-0.234989	-0.124265	-0.103902	-0.348258	0.107365			0.542	0.0997288	0.0691842	0.0908199	0.120092	0.243543
	0.543	0.0233674	0.0704569	0.111183	0.37463	0.0590027			0.543	0.0259127	0.0259127	0.05773	0.0806384	0.094638			0.543	-0.220989	-0.11281	-0.131901	-0.376257	0.0730023			0.543	0.113728	0.0844565	0.0997288	0.101001	0.232089
	0.544	0.00809509	0.0691842	0.108638	0.369539	0.0564573			0.544	0.0220947	0.0246401	0.0462758	0.0679115	0.0971834			0.544	-0.21208	-0.135719	-0.114083	-0.367348	0.0602754			0.544	0.10991	0.0755476	0.0768203	0.116274	0.237179
	0.545	0.0144585	0.0602754	0.10991	0.365721	0.0297308			0.545	0.0220947	0.0271854	0.0564573	0.0539119	0.0793657			0.545	-0.229898	-0.12681	-0.106447	-0.371166	0.0284581			0.545	0.131546	0.0691842	0.0971834	0.115001	0.229543
	0.546	0.0144585	0.0730023	0.10991	0.346631	-0.00463181			0.546	0.0144585	0.037367	0.0526392	0.0717296	0.078093			0.546	-0.217171	-0.135719	-0.111538	-0.378803	0.0068224			0.546	0.10991	0.0768203	0.0984561	0.104819	0.237179
	0.547	0.0119132	0.0590027	0.101001	0.356812	-0.000813741			0.547	0.0220947	0.0284581	0.0462758	0.0717296	0.0768203			0.547	-0.240079	-0.135719	-0.114083	-0.385166	-0.0249948			0.547	0.0984561	0.0564573	0.0933653	0.101001	0.238452
	0.548	0.0310035	0.0628207	0.107365	0.349176	-0.0275402			0.548	0.0195493	0.0170039	0.0424577	0.0640934	0.094638			0.548	-0.219716	-0.135719	-0.111538	-0.404256	-0.0504486			0.548	0.104819	0.0602754	0.0895472	0.111183	0.22318
	0.549	0.0284581	0.0462758	0.0984561	0.354267	-0.0479033			0.549	0.0195493	0.0131859	0.0551846	0.0717296	0.0895472			0.549	-0.218444	-0.14081	-0.125537	-0.390257	-0.0822659			0.549	0.115001	0.0602754	0.0920926	0.104819	0.229543
	0.55	0.0195493	0.0602754	0.0971834	0.337722	-0.0619029			0.55	0.0195493	0.0284581	0.0628207	0.0526392	0.0768203			0.55	-0.237534	-0.120447	-0.115356	-0.404256	-0.100084			0.55	0.102274	0.074275	0.0933653	0.115001	0.22827
	0.551	0.0233674	0.0488212	0.10991	0.331358	-0.089902			0.551	0.0195493	0.0284581	0.0488212	0.05773	0.0844565			0.551	-0.228625	-0.1459	-0.115356	-0.411892	-0.111538			0.551	0.118819	0.0730023	0.0895472	0.0959107	0.235906
	0.552	0.0259127	0.0602754	0.0984561	0.30845	-0.0988109			0.552	0.0220947	0.0271854	0.0424577	0.0730023	0.0730023			0.552	-0.248988	-0.139537	-0.10772	-0.406802	-0.128083			0.552	0.113728	0.0819111	0.0857292	0.106092	0.22827
	0.553	0.0259127	0.0513665	0.104819	0.309723	-0.117901			0.553	0.0259127	0.0271854	0.061548	0.0513665	0.0806384			0.553	-0.22608	-0.1459	-0.106447	-0.418256	-0.158627			0.553	0.116274	0.074275	0.101001	0.10991	0.229543
	0.554	0.0386396	0.0475485	0.0920926	0.316086	-0.139537			0.554	0.020822	0.020822	0.0462758	0.0424577	0.0857292			0.554	-0.219716	-0.134446	-0.108992	-0.428438	-0.172627			0.554	0.106092	0.0806384	0.0908199	0.106092	0.243543
	0.555	0.0195493	0.0590027	0.102274	0.29445	-0.154809			0.555	0.0195493	0.0360943	0.0704569	0.0653661	0.0819111			0.555	-0.223534	-0.139537	-0.108992	-0.427165	-0.189172			0.555	0.111183	0.0691842	0.0971834	0.113728	0.22827
	0.556	0.0144585	0.05773	0.0755476	0.288087	-0.153536			0.556	0.0284581	0.0310035	0.0513665	0.0526392	0.0793657			0.556	-0.248988	-0.161173	-0.103902	-0.460255	-0.208262			0.556	0.0997288	0.0755476	0.078093	0.125183	0.243543
	0.557	0.0144585	0.0526392	0.0844565	0.281723	-0.175172			0.557	0.0259127	0.0106405	0.0475485	0.05773	0.0768203			0.557	-0.246443	-0.139537	-0.11281	-0.446255	-0.233716			0.557	0.12391	0.0691842	0.113728	0.106092	0.219362
	0.558	0.020822	0.05773	0.0882745	0.267724	-0.182808			0.558	0.0233674	0.0424577	0.0500939	0.0450031	0.0793657			0.558	-0.236261	-0.152264	-0.110265	-0.4488	-0.254079			0.558	0.112456	0.0691842	0.0793657	0.116274	0.237179
	0.559	0.00300433	0.05773	0.0882745	0.253724	-0.191717			0.559	0.0233674	0.0233674	0.0475485	0.0590027	0.0908199			0.559	-0.232443	-0.162445	-0.0962655	-0.470436	-0.282078			0.559	0.0997288	0.0730023	0.0984561	0.117546	0.225725
	0.56	0.0233674	0.0590027	0.0895472	0.257542	-0.19299			0.56	0.0195493	0.0284581	0.0653661	0.0475485	0.0704569			0.56	-0.233716	-0.1599	-0.120447	-0.467891	-0.299896			0.56	0.108638	0.0679115	0.0895472	0.108638	0.226998
	0.561	0.00936778	0.0462758	0.0806384	0.240997	-0.191717			0.561	0.0284581	0.0220947	0.0475485	0.0679115	0.0730023			0.561	-0.22608	-0.168809	-0.0962655	-0.488254	-0.317713			0.561	0.127728	0.061548	0.0959107	0.0984561	0.226998
	0.562	0.0170039	0.0437304	0.0831838	0.226998	-0.198081			0.562	0.0233674	0.0335489	0.0564573	0.0666388	0.0831838			0.562	-0.213353	-0.143355	-0.103902	-0.506072	-0.327895			0.562	0.106092	0.0704569	0.0997288	0.103547	0.219362
	0.563	0.00936778	0.0551846	0.0793657	0.22318	-0.200626			0.563	0.0322762	0.0335489	0.0462758	0.0691842	0.0691842			0.563	-0.24517	-0.158627	-0.0988109	-0.521344	-0.36353			0.563	0.120092	0.0691842	0.094638	0.102274	0.235906
	0.564	0.0106405	0.0526392	0.0755476	0.214271	-0.200626			0.564	0.0182766	0.0284581	0.0564573	0.0628207	0.0704569			0.564	-0.229898	-0.171354	-0.11281	-0.511162	-0.373712			0.564	0.102274	0.0717296	0.0844565	0.108638	0.216816
	0.565	0.0233674	0.0653661	0.074275	0.215543	-0.191717			0.565	0.0259127	0.0195493	0.0513665	0.0628207	0.0730023			0.565	-0.222262	-0.171354	-0.106447	-0.525162	-0.397893			0.565	0.111183	0.0691842	0.103547	0.108638	0.226998
	0.566	0.0131859	0.0653661	0.0857292	0.210453	-0.204444			0.566	0.0259127	0.0284581	0.05773	0.05773	0.0755476			0.566	-0.218444	-0.171354	-0.108992	-0.535343	-0.415711			0.566	0.118819	0.0691842	0.0895472	0.101001	0.233361
	0.567	0.0068224	0.0564573	0.074275	0.202817	-0.198081			0.567	0.0437304	0.0233674	0.0513665	0.0564573	0.0704569			0.567	-0.21208	-0.177718	-0.11281	-0.535343	-0.415711			0.567	0.108638	0.0691842	0.101001	0.127728	0.225725
	0.568	0.0119132	0.0539119	0.0806384	0.210453	-0.196808			0.568	0.0399123	0.0271854	0.0488212	0.0691842	0.0628207			0.568	-0.213353	-0.172627	-0.0937201	-0.556979	-0.419529			0.568	0.108638	0.0895472	0.0870019	0.0997288	0.230816
	0.569	0.00173164	0.0513665	0.0691842	0.193908	-0.166263			0.569	0.0310035	0.0195493	0.0526392	0.0539119	0.0564573			0.569	-0.228625	-0.189172	-0.114083	-0.535343	-0.419529			0.569	0.125183	0.074275	0.0679115	0.115001	0.22827
	0.57	0.0131859	0.0564573	0.0755476	0.205362	-0.184081			0.57	0.0271854	0.0335489	0.0424577	0.0424577	0.0640934			0.57	-0.231171	-0.1739	-0.0937201	-0.54298	-0.452619			0.57	0.113728	0.0704569	0.111183	0.12391	0.214271
	0.571	0.00300433	0.0539119	0.0691842	0.191362	-0.184081			0.571	0.0348216	0.0335489	0.041185	0.0564573	0.0653661			0.571	-0.201899	-0.170081	-0.102629	-0.550616	-0.432256			0.571	0.113728	0.0806384	0.0997288	0.0933653	0.210453
	0.572	0.0119132	0.061548	0.0730023	0.192635	-0.172627			0.572	0.0360943	0.0157312	0.0424577	0.0437304	0.0717296			0.572	-0.204444	-0.175172	-0.117901	-0.554434	-0.437346			0.572	0.111183	0.0768203	0.0831838	0.0984561	0.205362
	0.573	0.0170039	0.061548	0.0691842	0.178636	-0.164991			0.573	0.0284581	0.0259127	0.0488212	0.0322762	0.0679115			0.573	-0.206989	-0.181536	-0.101356	-0.570979	-0.450073			0.573	0.115001	0.0666388	0.078093	0.0882745	0.201544
	0.574	0.0068224	0.0590027	0.0653661	0.182454	-0.171354			0.574	0.0297308	0.0271854	0.0590027	0.0399123	0.0755476			0.574	-0.205717	-0.1739	-0.0937201	-0.568433	-0.439892			0.574	0.120092	0.0730023	0.0882745	0.0895472	0.22827
	0.575	0.0131859	0.0539119	0.0793657	0.181181	-0.158627			0.575	0.0399123	0.0437304	0.05773	0.037367	0.0564573			0.575	-0.201899	-0.189172	-0.106447	-0.573524	-0.442437			0.575	0.111183	0.0704569	0.0691842	0.108638	0.22827
	0.576	0.0131859	0.0590027	0.0679115	0.192635	-0.156082			0.576	0.0348216	0.0259127	0.05773	0.0475485	0.0666388			0.576	-0.201899	-0.170081	-0.0988109	-0.56207	-0.442437			0.576	0.10991	0.0691842	0.104819	0.10991	0.230816
	0.577	0.00809509	0.0526392	0.074275	0.181181	-0.152264			0.577	0.0360943	0.020822	0.0437304	0.0475485	0.05773			0.577	-0.198081	-0.164991	-0.105174	-0.577342	-0.441164			0.577	0.113728	0.0640934	0.094638	0.108638	0.201544
	0.578	0.00936778	0.0602754	0.0666388	0.198998	-0.129355			0.578	0.0424577	0.0437304	0.0653661	0.0360943	0.061548			0.578	-0.208262	-0.191717	-0.0949928	-0.587524	-0.416983			0.578	0.101001	0.0679115	0.074275	0.0984561	0.206635
	0.579	0.0157312	0.0539119	0.0704569	0.181181	-0.135719			0.579	0.0259127	0.0310035	0.0488212	0.0348216	0.061548			0.579	-0.217171	-0.172627	-0.0975382	-0.584978	-0.416983			0.579	0.120092	0.0717296	0.0870019	0.0908199	0.210453
	0.58	0.0170039	0.0526392	0.0793657	0.19009	-0.129355			0.58	0.041185	0.0335489	0.0551846	0.0475485	0.061548			0.58	-0.199353	-0.17899	-0.0962655	-0.579888	-0.414438			0.58	0.111183	0.0793657	0.0984561	0.0984561	0.205362
	0.581	0.00427702	0.0539119	0.0691842	0.193908	-0.130628			0.581	0.0297308	0.0259127	0.0526392	0.0437304	0.0424577			0.581	-0.195535	-0.177718	-0.103902	-0.584978	-0.400438			0.581	0.113728	0.0768203	0.0768203	0.0768203	0.196453
	0.582	0.0119132	0.0526392	0.0844565	0.186272	-0.105174			0.582	0.0386396	0.0322762	0.0513665	0.0462758	0.0564573			0.582	-0.190444	-0.170081	-0.0962655	-0.57607	-0.37753			0.582	0.10991	0.0717296	0.0997288	0.113728	0.211725
	0.583	0.00809509	0.0551846	0.0768203	0.197726	-0.0962655			0.583	0.0322762	0.0271854	0.05773	0.0297308	0.041185			0.583	-0.21208	-0.167536	-0.105174	-0.568433	-0.368621			0.583	0.107365	0.0730023	0.094638	0.0870019	0.204089
	0.584	0.0106405	0.0564573	0.0882745	0.200271	-0.0962655			0.584	0.0437304	0.0259127	0.0679115	0.0462758	0.0399123			0.584	-0.196808	-0.175172	-0.102629	-0.558252	-0.380075			0.584	0.108638	0.0628207	0.0717296	0.078093	0.210453
	0.585	0.0182766	0.0513665	0.0819111	0.211725	-0.0886293			0.585	0.0335489	0.0271854	0.0513665	0.0462758	0.0437304			0.585	-0.204444	-0.175172	-0.108992	-0.554434	-0.338077			0.585	0.118819	0.0640934	0.0870019	0.0895472	0.215543
	0.586	0.00809509	0.0666388	0.0819111	0.211725	-0.0784478			0.586	0.0450031	0.0360943	0.05773	0.0590027	0.0360943			0.586	-0.198081	-0.167536	-0.086084	-0.553161	-0.327895			0.586	0.12391	0.0768203	0.0806384	0.0997288	0.202817
	0.587	0.0106405	0.0640934	0.0806384	0.201544	-0.0708117			0.587	0.0462758	0.0259127	0.0564573	0.0360943	0.0399123			0.587	-0.203171	-0.170081	-0.111538	-0.560797	-0.327895			0.587	0.103547	0.0590027	0.0806384	0.0933653	0.214271
	0.588	0.0297308	0.0450031	0.0831838	0.20918	-0.0720844			0.588	0.0297308	0.0233674	0.0399123	0.0386396	0.0360943			0.588	-0.204444	-0.175172	-0.115356	-0.546798	-0.31135			0.588	0.118819	0.0793657	0.0768203	0.0768203	0.196453
	0.589	0.0068224	0.0551846	0.094638	0.207907	-0.052994			0.589	0.0437304	0.0297308	0.0526392	0.0424577	0.0322762			0.589	-0.184081	-0.176445	-0.117901	-0.541707	-0.296078			0.589	0.108638	0.0602754	0.108638	0.0844565	0.187544
	0.59	0.0131859	0.0640934	0.0755476	0.212998	-0.0517213			0.59	0.0450031	0.0297308	0.0513665	0.0500939	0.0437304			0.59	-0.200626	-0.171354	-0.114083	-0.518799	-0.29226			0.59	0.10991	0.0768203	0.0755476	0.0933653	0.198998
	0.591	0.0170039	0.0691842	0.0870019	0.218089	-0.036449			0.591	0.0386396	0.0233674	0.061548	0.0322762	0.0386396			0.591	-0.195535	-0.162445	-0.129355	-0.521344	-0.265533			0.591	0.0997288	0.0730023	0.0971834	0.0933653	0.20918
	0.592	0.0170039	0.0551846	0.078093	0.218089	-0.0415398			0.592	0.041185	0.0399123	0.0564573	0.041185	0.0297308			0.592	-0.205717	-0.153536	-0.116628	-0.507344	-0.25917			0.592	0.122637	0.061548	0.0933653	0.0844565	0.200271
	0.593	0.0322762	0.05773	0.0870019	0.229543	-0.0249948			0.593	0.0488212	0.037367	0.0526392	0.0284581	0.0462758			0.593	-0.215898	-0.175172	-0.108992	-0.503526	-0.218444			0.593	0.117546	0.0679115	0.074275	0.0793657	0.196453
	0.594	0.00427702	0.0564573	0.078093	0.232089	-0.0186314			0.594	0.0564573	0.0424577	0.0513665	0.0335489	0.0360943			0.594	-0.186626	-0.1599	-0.125537	-0.490799	-0.220989			0.594	0.120092	0.0539119	0.0895472	0.074275	0.191362
	0.595	0.0157312	0.061548	0.0882745	0.239725	-0.0275402			0.595	0.0488212	0.0297308	0.0666388	0.0424577	0.0335489			0.595	-0.198081	-0.167536	-0.131901	-0.466618	-0.215898			0.595	0.10991	0.0704569	0.094638	0.0793657	0.196453
	0.596	0.0182766	0.05773	0.0870019	0.243543	-0.0224495			0.596	0.0500939	0.020822	0.0475485	0.0335489	0.0348216			0.596	-0.208262	-0.171354	-0.135719	-0.456437	-0.199353			0.596	0.094638	0.0768203	0.0768203	0.0730023	0.204089
	0.597	0.0284581	0.0564573	0.0895472	0.252451	-0.0199041			0.597	0.0360943	0.0386396	0.0488212	0.0220947	0.0437304			0.597	-0.199353	-0.149718	-0.121719	-0.44371	-0.176445			0.597	0.108638	0.0666388	0.0920926	0.0882745	0.197726
	0.598	0.0144585	0.0526392	0.0768203	0.252451	-0.00717719			0.598	0.0500939	0.0310035	0.0539119	0.041185	0.0488212			0.598	-0.195535	-0.158627	-0.125537	-0.447528	-0.154809			0.598	0.106092	0.0602754	0.0755476	0.0895472	0.191362
	0.599	0.0131859	0.0475485	0.0895472	0.249906	-0.0173587			0.599	0.0360943	0.0246401	0.05773	0.0322762	0.0322762			0.599	-0.196808	-0.185354	-0.129355	-0.419529	-0.142082			0.599	0.116274	0.0539119	0.0844565	0.0768203	0.202817
	0.6	0.0182766	0.05773	0.0882745	0.248633	-0.00717719			0.6	0.0462758	0.0182766	0.0539119	0.0386396	0.0233674			0.6	-0.213353	-0.176445	-0.121719	-0.423347	-0.138264			0.6	0.0984561	0.0679115	0.0768203	0.0831838	0.197726
	0.601	0.00554971	0.0539119	0.0755476	0.252451	-0.0122679			0.601	0.0475485	0.0284581	0.0500939	0.0399123	0.0360943			0.601	-0.196808	-0.164991	-0.135719	-0.419529	-0.134446			0.601	0.113728	0.0590027	0.0844565	0.0831838	0.196453
	0.602	0.0233674	0.0526392	0.0844565	0.266451	0.00300433			0.602	0.0551846	0.0475485	0.0386396	0.0348216	0.0271854			0.602	-0.198081	-0.1739	-0.124265	-0.400438	-0.100084			0.602	0.113728	0.0590027	0.0895472	0.0717296	0.191362
	0.603	0.0220947	0.0500939	0.0984561	0.263906	0.0170039			0.603	0.0475485	0.0182766	0.0551846	0.0437304	0.0437304			0.603	-0.196808	-0.150991	-0.133174	-0.395348	-0.0962655			0.603	0.108638	0.0704569	0.0755476	0.0768203	0.197726
	0.604	0.00936778	0.061548	0.0793657	0.270269	0.00936778			0.604	0.0475485	0.0220947	0.0564573	0.0475485	0.0360943			0.604	-0.198081	-0.154809	-0.119174	-0.395348	-0.0708117			0.604	0.115001	0.0831838	0.0844565	0.0984561	0.181181
	0.605	0.020822	0.0526392	0.0908199	0.265178	0.0131859			0.605	0.0590027	0.0297308	0.0462758	0.0564573	0.0271854			0.605	-0.19299	-0.157355	-0.138264	-0.360985	-0.0593575			0.605	0.118819	0.0730023	0.078093	0.0666388	0.202817
	0.606	0.0106405	0.0564573	0.0819111	0.276633	0.0157312			0.606	0.0539119	0.0360943	0.0513665	0.0475485	0.0271854			0.606	-0.213353	-0.154809	-0.114083	-0.364803	-0.049176			0.606	0.103547	0.0717296	0.0704569	0.0831838	0.197726
	0.607	0.0106405	0.0564573	0.0984561	0.276633	0.0259127			0.607	0.0462758	0.0322762	0.0526392	0.0399123	0.0271854			0.607	-0.184081	-0.148446	-0.122992	-0.338077	-0.0555394			0.607	0.103547	0.0640934	0.0857292	0.0844565	0.195181
	0.608	0.0157312	0.0437304	0.0908199	0.282996	0.0246401			0.608	0.041185	0.020822	0.0462758	0.0424577	0.0144585			0.608	-0.205717	-0.154809	-0.117901	-0.340622	-0.069539			0.608	0.121365	0.0666388	0.0933653	0.0908199	0.206635
	0.609	0.0195493	0.0488212	0.0908199	0.291905	0.0386396			0.609	0.041185	0.0182766	0.0450031	0.0424577	0.037367			0.609	-0.198081	-0.1459	-0.116628	-0.329168	-0.0542667			0.609	0.104819	0.0653661	0.0831838	0.0768203	0.197726
	0.61	0.0131859	0.0488212	0.0819111	0.277905	0.0322762			0.61	0.041185	0.0526392	0.0488212	0.0424577	0.0450031			0.61	-0.206989	-0.142082	-0.121719	-0.324077	-0.0746297			0.61	0.111183	0.074275	0.0870019	0.0640934	0.202817
	0.611	0.0182766	0.05773	0.0870019	0.290632	0.0399123			0.611	0.0564573	0.0233674	0.061548	0.0500939	0.0335489			0.611	-0.209535	-0.14081	-0.115356	-0.306259	-0.073357			0.611	0.101001	0.0590027	0.0793657	0.0819111	0.195181
	0.612	0.0170039	0.0462758	0.0895472	0.296996	0.0386396			0.612	0.0437304	0.0220947	0.0437304	0.0335489	0.0284581			0.612	-0.196808	-0.1459	-0.130628	-0.282078	-0.0708117			0.612	0.120092	0.0653661	0.0730023	0.0870019	0.191362
	0.613	0.00809509	0.0424577	0.094638	0.303359	0.0462758			0.613	0.0551846	0.0271854	0.0488212	0.0488212	0.0360943			0.613	-0.196808	-0.121719	-0.135719	-0.288442	-0.116628			0.613	0.116274	0.074275	0.0704569	0.0895472	0.191362
	0.614	0.0144585	0.05773	0.0870019	0.30845	0.0539119			0.614	0.0590027	0.0399123	0.0450031	0.0424577	0.0322762			0.614	-0.194263	-0.139537	-0.130628	-0.257897	-0.120447			0.614	0.101001	0.0768203	0.0831838	0.0844565	0.184999
	0.615	0.0297308	0.0590027	0.0984561	0.30845	0.0450031			0.615	0.05773	0.0475485	0.0513665	0.0424577	0.0399123			0.615	-0.191717	-0.135719	-0.134446	-0.246443	-0.117901			0.615	0.118819	0.078093	0.0844565	0.0768203	0.187544
	0.616	0.0233674	0.0526392	0.0831838	0.303359	0.0450031			0.616	0.0475485	0.0182766	0.0628207	0.0424577	0.037367			0.616	-0.218444	-0.136991	-0.130628	-0.256624	-0.1459			0.616	0.129001	0.0704569	0.078093	0.0768203	0.187544
	0.617	-0.000813741	0.0488212	0.0920926	0.30845	0.05773			0.617	0.0500939	0.0233674	0.0539119	0.0475485	0.0335489			0.617	-0.196808	-0.154809	-0.131901	-0.232443	-0.143355			0.617	0.104819	0.05773	0.0920926	0.0806384	0.183726
	0.618	0.0322762	0.0475485	0.101001	0.298268	0.0590027			0.618	0.0539119	0.0386396	0.0322762	0.0424577	0.0437304			0.618	-0.198081	-0.121719	-0.148446	-0.214626	-0.161173			0.618	0.113728	0.05773	0.0844565	0.0691842	0.195181
	0.619	0.0220947	0.0653661	0.0755476	0.310995	0.0564573			0.619	0.0640934	0.0335489	0.0590027	0.0386396	0.0335489			0.619	-0.198081	-0.130628	-0.135719	-0.223534	-0.199353			0.619	0.120092	0.0640934	0.0679115	0.0819111	0.19009
	0.62	0.0195493	0.0488212	0.0997288	0.313541	0.0628207			0.62	0.0488212	0.0271854	0.0475485	0.0513665	0.0475485			0.62	-0.19299	-0.121719	-0.134446	-0.214626	-0.184081			0.62	0.103547	0.0666388	0.0831838	0.0819111	0.188817
	0.621	0.0220947	0.0539119	0.0959107	0.317359	0.0640934			0.621	0.0551846	0.0259127	0.0539119	0.041185	0.0271854			0.621	-0.199353	-0.143355	-0.153536	-0.191717	-0.219716			0.621	0.106092	0.0755476	0.0793657	0.0768203	0.195181
	0.622	0.0157312	0.0500939	0.107365	0.30845	0.0717296			0.622	0.0590027	0.0297308	0.061548	0.0450031	0.0424577			0.622	-0.196808	-0.139537	-0.149718	-0.191717	-0.261715			0.622	0.112456	0.0526392	0.0870019	0.0768203	0.192635
	0.623	0.020822	0.0539119	0.0959107	0.310995	0.0640934			0.623	0.0539119	0.0386396	0.0590027	0.05773	0.0450031			0.623	-0.191717	-0.135719	-0.14081	-0.186626	-0.248988			0.623	0.102274	0.05773	0.0831838	0.0793657	0.183726
	0.624	0.0119132	0.0564573	0.101001	0.318631	0.0793657			0.624	0.05773	0.041185	0.0462758	0.0488212	0.0526392			0.624	-0.198081	-0.119174	-0.150991	-0.187899	-0.284623			0.624	0.108638	0.0730023	0.0844565	0.102274	0.178636
	0.625	0.00554971	0.0500939	0.0997288	0.322449	0.0590027			0.625	0.0564573	0.0297308	0.0475485	0.041185	0.0360943			0.625	-0.186626	-0.136991	-0.135719	-0.181536	-0.329168			0.625	0.121365	0.0704569	0.0819111	0.0857292	0.195181
	0.626	0.0195493	0.041185	0.101001	0.323722	0.078093			0.626	0.05773	0.0450031	0.0551846	0.0526392	0.0335489			0.626	-0.195535	-0.129355	-0.136991	-0.162445	-0.335531			0.626	0.118819	0.074275	0.0793657	0.102274	0.192635
	0.627	0.0233674	0.0386396	0.094638	0.326267	0.0666388			0.627	0.0526392	0.0259127	0.0513665	0.0462758	0.041185			0.627	-0.195535	-0.134446	-0.144628	-0.154809	-0.382621			0.627	0.104819	0.0768203	0.0717296	0.0806384	0.193908
	0.628	0.0131859	0.0437304	0.10991	0.335176	0.0793657			0.628	0.0551846	0.0220947	0.0590027	0.0539119	0.0360943			0.628	-0.190444	-0.119174	-0.147173	-0.142082	-0.397893			0.628	0.101001	0.0602754	0.0666388	0.0870019	0.198998
	0.629	0.0246401	0.037367	0.0997288	0.330086	0.0768203			0.629	0.0564573	0.037367	0.0462758	0.0386396	0.041185			0.629	-0.203171	-0.12681	-0.129355	-0.152264	-0.41062			0.629	0.12391	0.0793657	0.0882745	0.0768203	0.183726
	0.63	0.0131859	0.0437304	0.101001	0.337722	0.0717296			0.63	0.0564573	0.0424577	0.0475485	0.0399123	0.0526392			0.63	-0.195535	-0.119174	-0.134446	-0.129355	-0.41062			0.63	0.108638	0.0666388	0.0691842	0.0933653	0.201544
	0.631	0.0106405	0.0526392	0.0984561	0.323722	0.078093			0.631	0.0437304	0.0220947	0.0475485	0.0551846	0.0500939			0.631	-0.182808	-0.119174	-0.116628	-0.115356	-0.409347			0.631	0.116274	0.0640934	0.0971834	0.074275	0.186272
	0.632	0.0182766	0.0450031	0.0997288	0.333904	0.0870019			0.632	0.0628207	0.037367	0.0513665	0.0551846	0.0386396			0.632	-0.195535	-0.120447	-0.120447	-0.0975382	-0.424619			0.632	0.113728	0.0730023	0.0768203	0.078093	0.179908
	0.633	-0.000813741	0.0462758	0.101001	0.337722	0.0908199			0.633	0.0551846	0.0322762	0.0551846	0.0500939	0.0488212			0.633	-0.190444	-0.124265	-0.119174	-0.0631755	-0.416983			0.633	0.117546	0.0590027	0.074275	0.0844565	0.179908
	0.634	0.0144585	0.0551846	0.103547	0.330086	0.0819111			0.634	0.061548	0.0335489	0.0450031	0.0322762	0.0424577			0.634	-0.196808	-0.108992	-0.108992	-0.0682663	-0.391529			0.634	0.107365	0.0640934	0.0691842	0.0793657	0.196453
	0.635	0.0195493	0.0539119	0.115001	0.326267	0.0997288			0.635	0.0488212	0.037367	0.0551846	0.0437304	0.0488212			0.635	-0.198081	-0.10772	-0.103902	-0.0669936	-0.374984			0.635	0.118819	0.05773	0.078093	0.0882745	0.188817
	0.636	0.00809509	0.0488212	0.115001	0.330086	0.10991			0.636	0.0539119	0.0284581	0.0602754	0.041185	0.0475485			0.636	-0.187899	-0.10772	-0.108992	-0.052994	-0.343167			0.636	0.115001	0.0475485	0.094638	0.0806384	0.191362
	0.637	0.0119132	0.0488212	0.117546	0.32754	0.112456			0.637	0.0602754	0.0386396	0.0462758	0.0450031	0.0513665			0.637	-0.201899	-0.114083	-0.0873566	-0.0517213	-0.307532			0.637	0.118819	0.078093	0.0653661	0.0882745	0.202817
	0.638	0.00936778	0.0602754	0.115001	0.332631	0.120092			0.638	0.0551846	0.0297308	0.0551846	0.0335489	0.0437304			0.638	-0.19299	-0.110265	-0.0746297	-0.0211768	-0.298623			0.638	0.113728	0.0768203	0.074275	0.101001	0.193908
	0.639	0.020822	0.061548	0.121365	0.32754	0.141728			0.639	0.0500939	0.0310035	0.05773	0.0500939	0.0526392			0.639	-0.198081	-0.10772	-0.0975382	-0.0237222	-0.252806			0.639	0.0959107	0.0628207	0.078093	0.0793657	0.19009
	0.64	0.0220947	0.05773	0.113728	0.331358	0.135364			0.64	0.05773	0.0297308	0.0500939	0.0475485	0.0526392			0.64	-0.194263	-0.110265	-0.0962655	-0.0173587	-0.205717			0.64	0.115001	0.0666388	0.0831838	0.0908199	0.201544
	0.641	0.0182766	0.0564573	0.120092	0.335176	0.160818			0.641	0.0551846	0.0284581	0.0500939	0.037367	0.0500939			0.641	-0.191717	-0.111538	-0.0657209	-0.0237222	-0.162445			0.641	0.125183	0.0666388	0.0793657	0.0882745	0.19009
	0.642	0.0246401	0.0513665	0.112456	0.336449	0.173545			0.642	0.0475485	0.0284581	0.0539119	0.0475485	0.0500939			0.642	-0.189172	-0.0975382	-0.0835386	-0.032631	-0.128083			0.642	0.0997288	0.0755476	0.078093	0.0755476	0.20918
	0.643	0.0259127	0.0628207	0.118819	0.328813	0.182454			0.643	0.0666388	0.0399123	0.05773	0.0539119	0.0526392			0.643	-0.199353	-0.106447	-0.0848113	-0.00972257	-0.089902			0.643	0.118819	0.0653661	0.078093	0.0933653	0.205362
	0.644	0.020822	0.0628207	0.0971834	0.337722	0.191362			0.644	0.0500939	0.0360943	0.0437304	0.0475485	0.0590027			0.644	-0.203171	-0.102629	-0.0682663	-0.0186314	-0.0377217			0.644	0.113728	0.074275	0.0793657	0.0882745	0.19009
	0.645	0.0284581	0.0806384	0.122637	0.335176	0.181181			0.645	0.0602754	0.0284581	0.0488212	0.0704569	0.0551846			0.645	-0.190444	-0.089902	-0.069539	-0.0059045	-0.0135406			0.645	0.115001	0.0755476	0.0768203	0.0806384	0.192635
	0.646	0.020822	0.0640934	0.107365	0.349176	0.205362			0.646	0.0628207	0.0424577	0.0602754	0.0679115	0.0539119			0.646	-0.186626	-0.110265	-0.0771751	-0.00208643	0.0220947			0.646	0.113728	0.061548	0.0755476	0.0920926	0.188817
	0.647	0.0297308	0.0590027	0.10991	0.333904	0.216816			0.647	0.0450031	0.0246401	0.061548	0.0640934	0.0564573			0.647	-0.184081	-0.0886293	-0.0720844	-0.00208643	0.05773			0.647	0.116274	0.0640934	0.0793657	0.094638	0.200271
	0.648	0.0233674	0.0691842	0.104819	0.342813	0.226998			0.648	0.041185	0.0246401	0.0488212	0.061548	0.0450031			0.648	-0.186626	-0.0937201	-0.052994	0.00554971	0.0920926			0.648	0.108638	0.061548	0.0640934	0.0768203	0.198998
	0.649	0.0360943	0.074275	0.118819	0.355539	0.234634			0.649	0.0539119	0.0297308	0.0513665	0.0462758	0.0551846			0.649	-0.186626	-0.0924474	-0.0555394	-0.000813741	0.126455			0.649	0.117546	0.0488212	0.0844565	0.0933653	0.202817
	0.65	0.0310035	0.074275	0.125183	0.349176	0.246088			0.65	0.0628207	0.0233674	0.041185	0.05773	0.0666388			0.65	-0.191717	-0.116628	-0.0619029	0.00809509	0.153182			0.65	0.113728	0.0730023	0.078093	0.0819111	0.193908
	0.651	0.0297308	0.0768203	0.121365	0.347903	0.240997			0.651	0.0564573	0.0259127	0.0551846	0.0475485	0.0551846			0.651	-0.196808	-0.089902	-0.0542667	-0.00208643	0.168454			0.651	0.108638	0.0640934	0.0819111	0.0870019	0.200271
	0.652	0.0284581	0.0793657	0.12391	0.364448	0.260088			0.652	0.0488212	0.0399123	0.0475485	0.0539119	0.0704569			0.652	-0.184081	-0.0937201	-0.0479033	0.00554971	0.177363			0.652	0.113728	0.0653661	0.0895472	0.0908199	0.216816
	0.653	0.037367	0.0755476	0.125183	0.373357	0.27536			0.653	0.0526392	0.0335489	0.0590027	0.0539119	0.0526392			0.653	-0.185354	-0.0911747	-0.052994	0.0386396	0.196453			0.653	0.113728	0.0653661	0.0793657	0.0793657	0.196453
	0.654	0.0284581	0.0679115	0.12391	0.361903	0.272815			0.654	0.05773	0.0399123	0.0539119	0.0437304	0.0666388			0.654	-0.194263	-0.101356	-0.0593575	0.041185	0.253724			0.654	0.112456	0.0730023	0.074275	0.0984561	0.196453
	0.655	0.0170039	0.0755476	0.137909	0.372084	0.284269			0.655	0.0551846	0.0322762	0.0488212	0.0691842	0.0691842			0.655	-0.196808	-0.103902	-0.0542667	0.0437304	0.266451			0.655	0.121365	0.0768203	0.0857292	0.0895472	0.215543
	0.656	0.0297308	0.0730023	0.127728	0.373357	0.285541			0.656	0.0475485	0.0335489	0.0564573	0.0526392	0.0640934			0.656	-0.199353	-0.0975382	-0.0351764	0.037367	0.258815			0.656	0.117546	0.0653661	0.0730023	0.0870019	0.211725
	0.657	0.0271854	0.0793657	0.120092	0.373357	0.293178			0.657	0.0590027	0.0360943	0.0513665	0.0628207	0.0628207			0.657	-0.186626	-0.0835386	-0.049176	0.0590027	0.29445			0.657	0.10991	0.0691842	0.074275	0.101001	0.204089
	0.658	0.0399123	0.078093	0.134091	0.383539	0.304632			0.658	0.0628207	0.0386396	0.0539119	0.0500939	0.0679115			0.658	-0.1739	-0.0809932	-0.0377217	0.0475485	0.313541			0.658	0.108638	0.0717296	0.0730023	0.0971834	0.205362
	0.659	0.0246401	0.078093	0.131546	0.375902	0.318631			0.659	0.0590027	0.0348216	0.0539119	0.0526392	0.074275			0.659	-0.189172	-0.0962655	-0.0415398	0.0500939	0.335176			0.659	0.115001	0.061548	0.0717296	0.0844565	0.221907
	0.66	0.0348216	0.0895472	0.140455	0.386084	0.317359			0.66	0.0450031	0.0271854	0.0462758	0.0539119	0.0793657			0.66	-0.185354	-0.0797205	-0.0428125	0.0488212	0.331358			0.66	0.108638	0.0653661	0.0882745	0.0984561	0.207907
	0.661	0.037367	0.0768203	0.135364	0.388629	0.331358			0.661	0.0539119	0.037367	0.0526392	0.0666388	0.0628207			0.661	-0.191717	-0.0949928	-0.032631	0.0322762	0.356812			0.661	0.0984561	0.0717296	0.078093	0.0997288	0.182454
	0.662	0.0271854	0.0806384	0.127728	0.392447	0.321177			0.662	0.0513665	0.0310035	0.0539119	0.0450031	0.078093			0.662	-0.198081	-0.0873566	-0.0479033	0.0526392	0.337722			0.662	0.104819	0.05773	0.0908199	0.0870019	0.22318
	0.663	0.0271854	0.0831838	0.130273	0.402629	0.323722			0.663	0.0679115	0.0259127	0.0590027	0.0450031	0.0793657			0.663	-0.187899	-0.086084	-0.049176	0.0564573	0.352994			0.663	0.126455	0.0691842	0.0768203	0.0908199	0.196453
	0.664	0.0246401	0.0666388	0.135364	0.396265	0.336449			0.664	0.0539119	0.0437304	0.0500939	0.0602754	0.0730023			0.664	-0.195535	-0.0962655	-0.0479033	0.0691842	0.375902			0.664	0.103547	0.05773	0.0806384	0.0984561	0.215543
	0.665	0.0271854	0.0704569	0.134091	0.387357	0.347903			0.665	0.0653661	0.037367	0.0526392	0.05773	0.078093			0.665	-0.208262	-0.0949928	-0.0466306	0.061548	0.396265			0.665	0.111183	0.0704569	0.0793657	0.0819111	0.229543
	0.666	0.0246401	0.0882745	0.137909	0.396265	0.335176			0.666	0.0475485	0.0297308	0.0539119	0.0513665	0.078093			0.666	-0.189172	-0.0911747	-0.036449	0.0602754	0.401356			0.666	0.111183	0.0704569	0.0704569	0.0933653	0.216816
	0.667	0.0170039	0.0704569	0.121365	0.396265	0.361903			0.667	0.0462758	0.0310035	0.0513665	0.0640934	0.0819111			0.667	-0.194263	-0.0809932	-0.0351764	0.078093	0.388629			0.667	0.117546	0.0755476	0.0819111	0.104819	0.214271
	0.668	0.0335489	0.0704569	0.131546	0.400083	0.344085			0.668	0.0564573	0.037367	0.0462758	0.0640934	0.0755476			0.668	-0.195535	-0.0937201	-0.0249948	0.0488212	0.400083			0.668	0.10991	0.0755476	0.0793657	0.0971834	0.220634
	0.669	0.0348216	0.0882745	0.139182	0.394993	0.36063			0.669	0.0590027	0.0271854	0.0475485	0.0513665	0.0844565			0.669	-0.200626	-0.108992	-0.032631	0.0628207	0.400083			0.669	0.117546	0.0704569	0.0806384	0.0971834	0.221907
	0.67	0.0259127	0.0768203	0.140455	0.411538	0.364448			0.67	0.0653661	0.0386396	0.0475485	0.0488212	0.0691842			0.67	-0.198081	-0.0835386	-0.049176	0.05773	0.40772			0.67	0.116274	0.0730023	0.0717296	0.0920926	0.215543
	0.671	0.0284581	0.0844565	0.141728	0.410265	0.355539			0.671	0.0539119	0.0348216	0.061548	0.0564573	0.0717296			0.671	-0.189172	-0.0873566	-0.0415398	0.0348216	0.406447			0.671	0.132819	0.0640934	0.0793657	0.0882745	0.215543
	0.672	0.0386396	0.0730023	0.148091	0.398811	0.364448			0.672	0.0551846	0.0310035	0.0666388	0.0590027	0.0768203			0.672	-0.187899	-0.0848113	-0.0377217	0.0513665	0.42681			0.672	0.115001	0.0679115	0.074275	0.111183	0.225725
	0.673	0.020822	0.0844565	0.154454	0.41281	0.370812			0.673	0.05773	0.0424577	0.0462758	0.061548	0.0793657			0.673	-0.187899	-0.0988109	-0.0415398	0.0590027	0.424265			0.673	0.10991	0.0691842	0.0882745	0.113728	0.219362
	0.674	0.037367	0.0730023	0.136637	0.414083	0.363175			0.674	0.0628207	0.0259127	0.0526392	0.0386396	0.0831838			0.674	-0.186626	-0.089902	-0.0389944	0.0220947	0.430628			0.674	0.115001	0.0704569	0.0755476	0.0984561	0.206635
	0.675	0.0195493	0.0844565	0.154454	0.401356	0.366994			0.675	0.0424577	0.0246401	0.0564573	0.05773	0.0819111			0.675	-0.170081	-0.0848113	-0.0339037	0.020822	0.425537			0.675	0.106092	0.0679115	0.0768203	0.0895472	0.219362
	0.676	0.0233674	0.0857292	0.134091	0.410265	0.378448			0.676	0.0564573	0.0488212	0.0551846	0.0590027	0.0755476			0.676	-0.177718	-0.0924474	-0.032631	0.0640934	0.41281			0.676	0.115001	0.0653661	0.074275	0.106092	0.201544
	0.677	0.0335489	0.0793657	0.140455	0.400083	0.387357			0.677	0.0691842	0.0284581	0.0526392	0.05773	0.0793657			0.677	-0.175172	-0.0873566	-0.0377217	0.0513665	0.433173			0.677	0.101001	0.0602754	0.0895472	0.0959107	0.216816
	0.678	0.0271854	0.0844565	0.144273	0.422992	0.382266			0.678	0.0704569	0.0386396	0.0590027	0.0500939	0.0984561			0.678	-0.180263	-0.0822659	-0.0428125	0.0437304	0.430628			0.678	0.125183	0.0730023	0.078093	0.094638	0.212998
	0.679	0.0297308	0.0806384	0.141728	0.422992	0.373357			0.679	0.0539119	0.0348216	0.0500939	0.0488212	0.0730023			0.679	-0.182808	-0.0924474	-0.0300856	0.0564573	0.424265			0.679	0.111183	0.0640934	0.0666388	0.103547	0.206635
	0.68	0.0335489	0.0831838	0.149364	0.417901	0.383539			0.68	0.0564573	0.0386396	0.0526392	0.0526392	0.0806384			0.68	-0.162445	-0.0746297	-0.0339037	0.0513665	0.443355			0.68	0.106092	0.074275	0.0755476	0.0933653	0.206635
	0.681	0.0246401	0.0793657	0.139182	0.415356	0.389902			0.681	0.0691842	0.041185	0.0590027	0.0640934	0.0882745			0.681	-0.171354	-0.0759024	-0.0428125	0.0539119	0.450991			0.681	0.104819	0.0551846	0.0704569	0.0908199	0.215543
	0.682	0.0297308	0.0895472	0.137909	0.414083	0.378448			0.682	0.05773	0.0322762	0.0564573	0.05773	0.0933653			0.682	-0.177718	-0.0822659	-0.0466306	0.0640934	0.431901			0.682	0.120092	0.0768203	0.0819111	0.0971834	0.205362
	0.683	0.0170039	0.0653661	0.140455	0.41281	0.380993			0.683	0.0679115	0.0335489	0.0475485	0.074275	0.0895472			0.683	-0.166263	-0.086084	-0.0466306	0.0526392	0.435719			0.683	0.115001	0.0691842	0.0730023	0.0895472	0.216816
	0.684	0.0348216	0.0793657	0.145546	0.420447	0.382266			0.684	0.0513665	0.041185	0.0590027	0.0488212	0.0857292			0.684	-0.171354	-0.0988109	-0.0249948	0.0590027	0.449718			0.684	0.106092	0.0640934	0.0768203	0.0984561	0.221907
	0.685	0.0246401	0.078093	0.139182	0.410265	0.387357			0.685	0.061548	0.0220947	0.0500939	0.05773	0.0870019			0.685	-0.167536	-0.0873566	-0.0135406	0.061548	0.449718			0.685	0.101001	0.0691842	0.0691842	0.0895472	0.210453
	0.686	0.0259127	0.078093	0.144273	0.425537	0.394993			0.686	0.0640934	0.0284581	0.0602754	0.0640934	0.0730023			0.686	-0.161173	-0.086084	-0.0415398	0.0551846	0.436991			0.686	0.104819	0.0628207	0.0679115	0.0997288	0.214271
	0.687	0.0310035	0.0870019	0.145546	0.429355	0.392447			0.687	0.0564573	0.0233674	0.0488212	0.0691842	0.0895472			0.687	-0.14081	-0.069539	-0.0288129	0.0691842	0.439537			0.687	0.106092	0.0793657	0.0704569	0.111183	0.235906
	0.688	0.0246401	0.0831838	0.155727	0.42681	0.389902			0.688	0.0602754	0.0335489	0.0526392	0.0564573	0.0908199			0.688	-0.181536	-0.0924474	-0.032631	0.0590027	0.434446			0.688	0.113728	0.0475485	0.074275	0.120092	0.22827
	0.689	0.0297308	0.0730023	0.145546	0.411538	0.394993			0.689	0.05773	0.0399123	0.0437304	0.0628207	0.094638			0.689	-0.175172	-0.0937201	-0.0237222	0.0640934	0.435719			0.689	0.107365	0.0691842	0.0793657	0.0895472	0.20918
	0.69	0.0335489	0.0831838	0.134091	0.414083	0.408992			0.69	0.05773	0.0399123	0.0653661	0.0590027	0.0768203			0.69	-0.187899	-0.0924474	-0.0568121	0.0691842	0.434446			0.69	0.116274	0.0730023	0.0640934	0.108638	0.221907
	0.691	0.0271854	0.0793657	0.146818	0.408992	0.388629			0.691	0.0513665	0.041185	0.0424577	0.05773	0.0844565			0.691	-0.157355	-0.0848113	-0.0389944	0.0475485	0.447173			0.691	0.102274	0.0793657	0.0870019	0.0920926	0.229543
	0.692	0.037367	0.0844565	0.146818	0.42681	0.389902			0.692	0.0640934	0.0310035	0.0462758	0.0602754	0.0806384			0.692	-0.163718	-0.0809932	-0.0224495	0.078093	0.431901			0.692	0.106092	0.0653661	0.0755476	0.0920926	0.216816
	0.693	0.0271854	0.0908199	0.143	0.419174	0.411538			0.693	0.061548	0.0271854	0.0526392	0.0717296	0.0908199			0.693	-0.171354	-0.0835386	-0.0300856	0.0704569	0.447173			0.693	0.10991	0.0602754	0.0755476	0.0895472	0.230816
	0.694	0.0335489	0.0831838	0.137909	0.419174	0.400083			0.694	0.0793657	0.041185	0.0564573	0.0564573	0.0857292			0.694	-0.182808	-0.100084	-0.0453579	0.061548	0.436991			0.694	0.113728	0.0640934	0.0730023	0.0984561	0.215543
	0.695	0.0271854	0.0793657	0.151909	0.411538	0.400083			0.695	0.0640934	0.0322762	0.0590027	0.0602754	0.0819111			0.695	-0.164991	-0.103902	-0.0288129	0.0386396	0.447173			0.695	0.118819	0.0793657	0.0666388	0.111183	0.219362
	0.696	0.0335489	0.0831838	0.140455	0.419174	0.41281			0.696	0.0653661	0.0220947	0.0551846	0.0640934	0.0819111			0.696	-0.1739	-0.0771751	-0.0288129	0.0437304	0.439537			0.696	0.120092	0.0513665	0.0691842	0.104819	0.214271
	0.697	0.0360943	0.0730023	0.145546	0.422992	0.420447			0.697	0.0679115	0.0360943	0.0513665	0.041185	0.0870019			0.697	-0.161173	-0.0809932	-0.0402671	0.037367	0.442082			0.697	0.101001	0.0704569	0.0679115	0.104819	0.219362
	0.698	0.037367	0.0971834	0.150636	0.415356	0.421719			0.698	0.0590027	0.0437304	0.0666388	0.0551846	0.0895472			0.698	-0.171354	-0.0924474	-0.0339037	0.041185	0.439537			0.698	0.0984561	0.0768203	0.0666388	0.107365	0.212998
	0.699	0.041185	0.0844565	0.144273	0.414083	0.397538			0.699	0.061548	0.0297308	0.0475485	0.0602754	0.102274			0.699	-0.164991	-0.086084	-0.0415398	0.0513665	0.435719			0.699	0.0997288	0.0640934	0.0895472	0.0971834	0.226998
	0.7	0.0386396	0.0806384	0.154454	0.415356	0.417901			0.7	0.0691842	0.0348216	0.0704569	0.0564573	0.0793657			0.7	-0.167536	-0.0975382	-0.0275402	0.05773	0.444628			0.7	0.120092	0.0768203	0.0768203	0.106092	0.221907
	0.701	0.0462758	0.0793657	0.139182	0.408992	0.419174			0.701	0.0640934	0.0437304	0.05773	0.0602754	0.0768203			0.701	-0.175172	-0.089902	-0.0211768	0.0284581	0.433173			0.701	0.116274	0.0679115	0.0857292	0.113728	0.20918
	0.702	0.0322762	0.0882745	0.148091	0.421719	0.422992			0.702	0.0590027	0.0322762	0.0513665	0.0500939	0.0895472			0.702	-0.189172	-0.0835386	-0.0339037	0.0475485	0.450991			0.702	0.121365	0.0666388	0.074275	0.103547	0.215543
	0.703	0.0284581	0.0857292	0.139182	0.425537	0.421719			0.703	0.0628207	0.0335489	0.0590027	0.061548	0.0920926			0.703	-0.166263	-0.0962655	-0.0479033	0.037367	0.443355			0.703	0.10991	0.0653661	0.0844565	0.0997288	0.226998
	0.704	0.0386396	0.0806384	0.155727	0.414083	0.416629			0.704	0.0691842	0.0399123	0.0551846	0.0640934	0.0908199			0.704	-0.182808	-0.0937201	-0.036449	0.0475485	0.425537			0.704	0.107365	0.0500939	0.074275	0.113728	0.230816
	0.705	0.0335489	0.0882745	0.150636	0.40772	0.429355			0.705	0.0717296	0.0335489	0.061548	0.0628207	0.0882745			0.705	-0.157355	-0.0873566	-0.032631	0.0691842	0.457355			0.705	0.0997288	0.0666388	0.0844565	0.0870019	0.220634
	0.706	0.0424577	0.0831838	0.150636	0.430628	0.414083			0.706	0.05773	0.0322762	0.0513665	0.0590027	0.094638			0.706	-0.171354	-0.0746297	-0.0237222	0.0488212	0.439537			0.706	0.104819	0.0793657	0.0806384	0.104819	0.233361
	0.707	0.0297308	0.0882745	0.150636	0.415356	0.42681			0.707	0.0526392	0.037367	0.037367	0.0539119	0.094638			0.707	-0.185354	-0.105174	-0.0339037	0.0679115	0.425537			0.707	0.108638	0.0717296	0.0730023	0.10991	0.229543
	0.708	0.0284581	0.0730023	0.140455	0.408992	0.405174			0.708	0.0679115	0.0220947	0.0526392	0.0640934	0.0882745			0.708	-0.171354	-0.0886293	-0.032631	0.061548	0.435719			0.708	0.104819	0.0831838	0.0895472	0.0971834	0.219362
	0.709	0.0437304	0.0755476	0.151909	0.398811	0.420447			0.709	0.0666388	0.0360943	0.0640934	0.0602754	0.0895472			0.709	-0.170081	-0.089902	-0.0288129	0.0424577	0.42681			0.709	0.121365	0.0806384	0.0870019	0.104819	0.225725
	0.71	0.0386396	0.0844565	0.145546	0.397538	0.415356			0.71	0.0628207	0.0437304	0.0640934	0.0628207	0.0882745			0.71	-0.1599	-0.0886293	-0.0199041	0.0475485	0.447173			0.71	0.107365	0.0679115	0.0691842	0.0984561	0.211725
	0.711	0.0259127	0.078093	0.149364	0.41281	0.387357			0.711	0.0691842	0.0386396	0.0500939	0.0602754	0.0933653			0.711	-0.176445	-0.0975382	-0.0262675	0.0564573	0.439537			0.711	0.0959107	0.0806384	0.0844565	0.113728	0.215543
	0.712	0.0424577	0.0819111	0.140455	0.41281	0.396265			0.712	0.061548	0.0360943	0.05773	0.0640934	0.094638			0.712	-0.175172	-0.0937201	-0.0249948	0.0297308	0.425537			0.712	0.111183	0.0602754	0.0806384	0.113728	0.237179
	0.713	0.0322762	0.0819111	0.141728	0.401356	0.39372			0.713	0.0730023	0.0322762	0.0526392	0.0590027	0.0933653			0.713	-0.1739	-0.0924474	-0.0428125	0.0335489	0.421719			0.713	0.126455	0.0590027	0.0640934	0.106092	0.216816
	0.714	0.0335489	0.074275	0.148091	0.396265	0.380993			0.714	0.0488212	0.0386396	0.0590027	0.074275	0.0997288			0.714	-0.168809	-0.0937201	-0.0339037	0.0399123	0.414083			0.714	0.111183	0.0730023	0.0895472	0.10991	0.212998
	0.715	0.041185	0.0831838	0.148091	0.402629	0.383539			0.715	0.061548	0.0424577	0.05773	0.0590027	0.0984561			0.715	-0.164991	-0.100084	-0.036449	0.0437304	0.405174			0.715	0.112456	0.0704569	0.0768203	0.108638	0.221907
	0.716	0.0297308	0.0831838	0.149364	0.398811	0.372084			0.716	0.061548	0.0399123	0.0475485	0.0590027	0.0984561			0.716	-0.182808	-0.0988109	-0.0313583	0.037367	0.394993			0.716	0.118819	0.074275	0.0730023	0.104819	0.229543
	0.717	0.0348216	0.0844565	0.160818	0.396265	0.359357			0.717	0.0691842	0.0259127	0.0590027	0.0539119	0.094638			0.717	-0.180263	-0.0797205	-0.0262675	0.0335489	0.400083			0.717	0.118819	0.061548	0.0933653	0.101001	0.229543
	0.718	0.0322762	0.0882745	0.148091	0.383539	0.346631			0.718	0.0590027	0.0348216	0.05773	0.0730023	0.0895472			0.718	-0.158627	-0.100084	-0.0377217	0.0271854	0.387357			0.718	0.111183	0.0704569	0.0844565	0.0971834	0.226998
	0.719	0.0488212	0.0819111	0.150636	0.377175	0.358085			0.719	0.0666388	0.037367	0.0539119	0.0717296	0.094638			0.719	-0.168809	-0.0873566	-0.0389944	0.0526392	0.358085			0.719	0.130273	0.0704569	0.0870019	0.107365	0.206635
	0.72	0.0462758	0.0755476	0.145546	0.383539	0.335176			0.72	0.0628207	0.0462758	0.0462758	0.0564573	0.0971834			0.72	-0.164991	-0.0988109	-0.0275402	0.0526392	0.356812			0.72	0.106092	0.0691842	0.074275	0.111183	0.218089
	0.721	0.0399123	0.0755476	0.145546	0.382266	0.349176			0.721	0.0602754	0.0386396	0.0526392	0.0551846	0.0882745			0.721	-0.17899	-0.110265	-0.032631	0.0335489	0.358085			0.721	0.112456	0.078093	0.0704569	0.0971834	0.230816
	0.722	0.0322762	0.0793657	0.140455	0.377175	0.337722			0.722	0.0602754	0.037367	0.05773	0.0475485	0.0882745			0.722	-0.177718	-0.086084	-0.0224495	0.0564573	0.358085			0.722	0.113728	0.0691842	0.0819111	0.104819	0.214271
	0.723	0.041185	0.0895472	0.140455	0.366994	0.330086			0.723	0.0564573	0.0284581	0.0450031	0.0679115	0.102274			0.723	-0.152264	-0.101356	-0.0428125	0.0450031	0.351721			0.723	0.0997288	0.0628207	0.0870019	0.118819	0.219362
	0.724	0.037367	0.074275	0.143	0.368266	0.324995			0.724	0.0666388	0.0335489	0.061548	0.0628207	0.0971834			0.724	-0.167536	-0.10772	-0.0415398	0.0513665	0.342813			0.724	0.108638	0.0717296	0.0806384	0.104819	0.22827
	0.725	0.0450031	0.0844565	0.146818	0.361903	0.317359			0.725	0.0691842	0.0297308	0.0602754	0.0679115	0.0984561			0.725	-0.181536	-0.0988109	-0.0288129	0.0297308	0.335176			0.725	0.115001	0.0704569	0.0691842	0.0997288	0.216816
	0.726	0.0322762	0.0870019	0.151909	0.356812	0.340267			0.726	0.0590027	0.0310035	0.0590027	0.0640934	0.094638			0.726	-0.191717	-0.0988109	-0.0300856	0.0310035	0.326267			0.726	0.130273	0.0819111	0.0806384	0.101001	0.233361
	0.727	0.041185	0.0933653	0.139182	0.361903	0.318631			0.727	0.0590027	0.0399123	0.0526392	0.0679115	0.0971834			0.727	-0.168809	-0.105174	-0.0313583	0.0437304	0.30845			0.727	0.117546	0.0768203	0.0730023	0.116274	0.226998
	0.728	0.037367	0.0844565	0.145546	0.359357	0.316086			0.728	0.05773	0.0233674	0.0437304	0.0602754	0.0870019			0.728	-0.175172	-0.0924474	-0.0339037	0.0297308	0.331358			0.728	0.107365	0.0730023	0.0666388	0.10991	0.204089
	0.729	0.0259127	0.0870019	0.150636	0.350449	0.302086			0.729	0.0640934	0.0310035	0.05773	0.05773	0.104819			0.729	-0.168809	-0.0962655	-0.0339037	0.0462758	0.314813			0.729	0.104819	0.0488212	0.0730023	0.102274	0.226998
	0.73	0.0259127	0.0768203	0.141728	0.342813	0.302086			0.73	0.0730023	0.041185	0.0526392	0.061548	0.103547			0.73	-0.176445	-0.0937201	-0.036449	0.0526392	0.310995			0.73	0.107365	0.0679115	0.0882745	0.106092	0.216816
	0.731	0.0386396	0.074275	0.146818	0.345358	0.314813			0.731	0.0730023	0.0462758	0.0488212	0.05773	0.0959107			0.731	-0.176445	-0.089902	-0.036449	0.0513665	0.312268			0.731	0.108638	0.0602754	0.0870019	0.107365	0.225725
	0.732	0.0360943	0.094638	0.158273	0.352994	0.304632			0.732	0.0640934	0.0360943	0.0679115	0.0755476	0.0895472			0.732	-0.167536	-0.108992	-0.0224495	0.0335489	0.313541			0.732	0.113728	0.0640934	0.094638	0.102274	0.210453
	0.733	0.0437304	0.074275	0.159545	0.34154	0.296996			0.733	0.05773	0.0437304	0.05773	0.0844565	0.0959107			0.733	-0.164991	-0.111538	-0.0288129	0.0450031	0.323722			0.733	0.12391	0.0551846	0.0730023	0.0971834	0.224452
	0.734	0.0310035	0.0730023	0.144273	0.34154	0.300814			0.734	0.05773	0.0348216	0.0462758	0.0526392	0.094638			0.734	-0.176445	-0.144628	-0.0288129	0.0386396	0.32754			0.734	0.107365	0.0806384	0.0895472	0.103547	0.224452
	0.735	0.0462758	0.0768203	0.137909	0.342813	0.304632			0.735	0.0640934	0.0551846	0.0475485	0.0590027	0.0984561			0.735	-0.175172	-0.125537	-0.0313583	0.041185	0.322449			0.735	0.116274	0.0679115	0.0730023	0.115001	0.22318
	0.736	0.0335489	0.0870019	0.149364	0.338994	0.298268			0.736	0.0640934	0.0437304	0.0653661	0.0704569	0.102274			0.736	-0.177718	-0.108992	-0.0275402	0.0437304	0.307177			0.736	0.112456	0.0704569	0.0870019	0.0971834	0.230816
	0.737	0.0310035	0.0691842	0.140455	0.328813	0.303359			0.737	0.0551846	0.0310035	0.0564573	0.0488212	0.108638			0.737	-0.172627	-0.100084	-0.0351764	0.0462758	0.319904			0.737	0.121365	0.0806384	0.0857292	0.111183	0.210453
	0.738	0.0424577	0.0806384	0.143	0.332631	0.300814			0.738	0.0768203	0.0360943	0.061548	0.0691842	0.0971834			0.738	-0.180263	-0.0873566	-0.0440852	0.0488212	0.312268			0.738	0.115001	0.0819111	0.094638	0.0971834	0.230816
	0.739	0.0284581	0.0806384	0.151909	0.32754	0.299541			0.739	0.0653661	0.0348216	0.0526392	0.074275	0.108638			0.739	-0.161173	-0.103902	-0.0237222	0.0551846	0.333904			0.739	0.116274	0.0908199	0.0882745	0.115001	0.215543
	0.74	0.0424577	0.0806384	0.141728	0.330086	0.288087			0.74	0.0564573	0.0539119	0.0539119	0.0653661	0.10991			0.74	-0.195535	-0.0835386	-0.032631	0.0386396	0.310995			0.74	0.106092	0.0768203	0.074275	0.0971834	0.218089
	0.741	0.0322762	0.0895472	0.146818	0.307177	0.300814			0.741	0.0730023	0.0335489	0.0526392	0.0666388	0.115001			0.741	-0.189172	-0.0937201	-0.0237222	0.0513665	0.32754			0.741	0.111183	0.0679115	0.0653661	0.113728	0.210453
	0.742	0.0488212	0.0793657	0.146818	0.318631	0.30845			0.742	0.0679115	0.0297308	0.0551846	0.0755476	0.10991			0.742	-0.181536	-0.0835386	-0.032631	0.05773	0.332631			0.742	0.104819	0.0691842	0.0691842	0.104819	0.229543
	0.743	0.0360943	0.0730023	0.144273	0.323722	0.280451			0.743	0.0640934	0.037367	0.05773	0.0640934	0.125183			0.743	-0.176445	-0.0949928	-0.0288129	0.0564573	0.350449			0.743	0.107365	0.0590027	0.0768203	0.122637	0.237179
	0.744	0.0335489	0.0882745	0.140455	0.310995	0.303359			0.744	0.0679115	0.0424577	0.0437304	0.0717296	0.10991			0.744	-0.191717	-0.0911747	-0.0199041	0.0602754	0.330086			0.744	0.103547	0.0691842	0.0768203	0.117546	0.230816
	0.745	0.0322762	0.0819111	0.150636	0.30845	0.300814			0.745	0.0691842	0.0386396	0.0551846	0.0717296	0.116274			0.745	-0.187899	-0.0886293	-0.0249948	0.0488212	0.354267			0.745	0.118819	0.0730023	0.094638	0.111183	0.221907
	0.746	0.0297308	0.0730023	0.158273	0.313541	0.291905			0.746	0.0691842	0.0475485	0.0539119	0.0704569	0.108638			0.746	-0.167536	-0.0975382	-0.0249948	0.0526392	0.352994			0.746	0.117546	0.0628207	0.0959107	0.112456	0.229543
	0.747	0.0360943	0.078093	0.157	0.300814	0.293178			0.747	0.05773	0.0284581	0.0640934	0.0590027	0.115001			0.747	-0.177718	-0.0911747	-0.0262675	0.0488212	0.346631			0.747	0.112456	0.05773	0.074275	0.108638	0.215543
	0.748	0.037367	0.0793657	0.157	0.29445	0.298268			0.748	0.0831838	0.0437304	0.0437304	0.0679115	0.122637			0.748	-0.170081	-0.0835386	-0.0237222	0.0653661	0.355539			0.748	0.112456	0.0730023	0.0806384	0.101001	0.22318
	0.749	0.0322762	0.0793657	0.139182	0.295723	0.300814			0.749	0.0628207	0.0322762	0.0590027	0.078093	0.106092			0.749	-0.201899	-0.0988109	-0.0288129	0.0653661	0.375902			0.749	0.103547	0.0691842	0.0895472	0.102274	0.232089
	0.75	0.0437304	0.0717296	0.141728	0.289359	0.307177			0.75	0.0602754	0.0488212	0.0640934	0.0679115	0.0933653			0.75	-0.180263	-0.086084	-0.0288129	0.0526392	0.36063			0.75	0.103547	0.0602754	0.0819111	0.106092	0.235906
	0.751	0.0386396	0.0819111	0.141728	0.286814	0.304632			0.751	0.0602754	0.041185	0.0640934	0.0717296	0.0959107			0.751	-0.181536	-0.0949928	-0.0249948	0.0564573	0.364448			0.751	0.117546	0.0679115	0.0908199	0.120092	0.22318
	0.752	0.0360943	0.0882745	0.158273	0.291905	0.30845			0.752	0.0602754	0.0271854	0.0590027	0.0819111	0.0997288			0.752	-0.199353	-0.0937201	-0.0313583	0.0590027	0.359357			0.752	0.113728	0.0679115	0.0844565	0.107365	0.221907
	0.753	0.0437304	0.0819111	0.144273	0.290632	0.314813			0.753	0.0679115	0.037367	0.0424577	0.0793657	0.0806384			0.753	-0.198081	-0.089902	-0.0275402	0.0500939	0.382266			0.753	0.10991	0.0768203	0.0704569	0.113728	0.230816
	0.754	0.0271854	0.0793657	0.150636	0.298268	0.299541			0.754	0.0691842	0.037367	0.0666388	0.074275	0.107365			0.754	-0.196808	-0.0949928	-0.0224495	0.0526392	0.369539			0.754	0.112456	0.0730023	0.094638	0.134091	0.22318
	0.755	0.037367	0.0768203	0.143	0.29445	0.312268			0.755	0.0640934	0.0386396	0.061548	0.0755476	0.112456			0.755	-0.190444	-0.0886293	-0.0199041	0.0526392	0.383539			0.755	0.106092	0.0768203	0.0691842	0.111183	0.221907
	0.756	0.0335489	0.0895472	0.159545	0.290632	0.314813			0.756	0.0691842	0.0386396	0.0513665	0.0640934	0.104819			0.756	-0.21208	-0.086084	-0.0275402	0.05773	0.364448			0.756	0.12391	0.0717296	0.0819111	0.101001	0.239725
	0.757	0.0424577	0.0831838	0.154454	0.286814	0.313541			0.757	0.0717296	0.0360943	0.0475485	0.074275	0.103547			0.757	-0.209535	-0.0797205	-0.0288129	0.05773	0.380993			0.757	0.116274	0.0628207	0.0704569	0.106092	0.221907
	0.758	0.0500939	0.0933653	0.157	0.290632	0.322449			0.758	0.0628207	0.0284581	0.05773	0.078093	0.111183			0.758	-0.208262	-0.0924474	-0.0237222	0.0564573	0.394993			0.758	0.101001	0.078093	0.0806384	0.118819	0.210453
	0.759	0.0437304	0.0857292	0.160818	0.293178	0.312268			0.759	0.0640934	0.0462758	0.0526392	0.074275	0.112456			0.759	-0.205717	-0.100084	-0.0249948	0.0526392	0.39372			0.759	0.106092	0.0730023	0.0920926	0.111183	0.235906
	0.76	0.0539119	0.078093	0.155727	0.288087	0.324995			0.76	0.0819111	0.0437304	0.0602754	0.0564573	0.117546			0.76	-0.200626	-0.0924474	-0.0288129	0.0526392	0.379721			0.76	0.120092	0.0768203	0.0831838	0.111183	0.22827
	0.761	0.0488212	0.0704569	0.149364	0.288087	0.309723			0.761	0.0806384	0.0284581	0.0590027	0.0768203	0.121365			0.761	-0.199353	-0.086084	-0.032631	0.0424577	0.398811			0.761	0.10991	0.0730023	0.0819111	0.107365	0.237179
	0.762	0.0348216	0.0806384	0.155727	0.281723	0.317359			0.762	0.0679115	0.0386396	0.061548	0.061548	0.107365			0.762	-0.194263	-0.0835386	-0.0199041	0.0488212	0.379721			0.762	0.0870019	0.0628207	0.0768203	0.10991	0.235906
	0.763	0.0348216	0.0882745	0.154454	0.279178	0.323722			0.763	0.0628207	0.0348216	0.0526392	0.0691842	0.12391			0.763	-0.200626	-0.0911747	-0.0377217	0.0488212	0.383539			0.763	0.102274	0.0870019	0.0997288	0.134091	0.232089
	0.764	0.0450031	0.0831838	0.160818	0.291905	0.335176			0.764	0.0653661	0.0437304	0.05773	0.0730023	0.12391			0.764	-0.189172	-0.0937201	-0.0186314	0.0539119	0.387357			0.764	0.118819	0.0653661	0.0793657	0.111183	0.237179
	0.765	0.0297308	0.0844565	0.135364	0.29445	0.328813			0.765	0.0806384	0.0462758	0.0539119	0.0806384	0.12391			0.765	-0.176445	-0.089902	-0.0300856	0.0526392	0.369539			0.765	0.118819	0.0590027	0.0793657	0.113728	0.220634
	0.766	0.0360943	0.0870019	0.163363	0.288087	0.331358			0.766	0.05773	0.0475485	0.0628207	0.078093	0.117546			0.766	-0.166263	-0.10772	-0.0173587	0.0526392	0.387357			0.766	0.112456	0.0908199	0.0691842	0.115001	0.221907
	0.767	0.0335489	0.0895472	0.148091	0.285541	0.333904			0.767	0.0844565	0.0360943	0.0488212	0.0730023	0.115001			0.767	-0.180263	-0.100084	-0.0122679	0.0259127	0.392447			0.767	0.113728	0.0691842	0.0831838	0.122637	0.225725
	0.768	0.0437304	0.0768203	0.16209	0.302086	0.340267			0.768	0.0704569	0.0348216	0.0640934	0.0704569	0.112456			0.768	-0.185354	-0.0937201	-0.032631	0.037367	0.375902			0.768	0.116274	0.0768203	0.074275	0.108638	0.219362
	0.769	0.0310035	0.078093	0.150636	0.300814	0.336449			0.769	0.0730023	0.0488212	0.0691842	0.0819111	0.113728			0.769	-0.190444	-0.0771751	-0.0300856	0.0386396	0.401356			0.769	0.107365	0.0844565	0.0819111	0.113728	0.229543
	0.77	0.0360943	0.074275	0.145546	0.295723	0.332631			0.77	0.0679115	0.0399123	0.0500939	0.0704569	0.120092			0.77	-0.220989	-0.0988109	-0.0275402	0.0335489	0.396265			0.77	0.107365	0.0806384	0.0819111	0.108638	0.230816
	0.771	0.0322762	0.078093	0.141728	0.29445	0.338994			0.771	0.0704569	0.0284581	0.05773	0.074275	0.115001			0.771	-0.201899	-0.0975382	-0.0237222	0.0310035	0.391175			0.771	0.113728	0.0730023	0.0768203	0.120092	0.22827
	0.772	0.0348216	0.0819111	0.163363	0.309723	0.342813			0.772	0.0831838	0.0335489	0.0602754	0.0717296	0.106092			0.772	-0.213353	-0.0988109	-0.0351764	0.0386396	0.398811			0.772	0.10991	0.0551846	0.0882745	0.10991	0.235906
	0.773	0.0335489	0.074275	0.148091	0.286814	0.34154			0.773	0.0691842	0.0539119	0.0437304	0.0717296	0.0984561			0.773	-0.228625	-0.089902	-0.0173587	0.037367	0.397538			0.773	0.112456	0.0793657	0.0768203	0.112456	0.229543
	0.774	0.0348216	0.074275	0.155727	0.305905	0.349176			0.774	0.0819111	0.0386396	0.0691842	0.0831838	0.118819			0.774	-0.21208	-0.0873566	-0.0313583	0.0653661	0.382266			0.774	0.111183	0.0640934	0.0806384	0.120092	0.232089
	0.775	0.0360943	0.0870019	0.167181	0.307177	0.336449			0.775	0.0704569	0.0462758	0.0526392	0.078093	0.120092			0.775	-0.210808	-0.0720844	-0.0339037	0.037367	0.394993			0.775	0.107365	0.078093	0.0819111	0.112456	0.235906
	0.776	0.0322762	0.0908199	0.139182	0.295723	0.355539			0.776	0.0679115	0.0386396	0.0628207	0.0806384	0.118819			0.776	-0.205717	-0.0873566	-0.0135406	0.0475485	0.39372			0.776	0.115001	0.0730023	0.0806384	0.111183	0.221907
	0.777	0.0360943	0.0793657	0.141728	0.299541	0.351721			0.777	0.0691842	0.0284581	0.0526392	0.0755476	0.12391			0.777	-0.190444	-0.110265	-0.032631	0.0526392	0.384811			0.777	0.101001	0.0730023	0.0831838	0.103547	0.221907
	0.778	0.0310035	0.0806384	0.154454	0.309723	0.345358			0.778	0.0806384	0.0322762	0.0526392	0.0793657	0.115001			0.778	-0.205717	-0.0924474	-0.0377217	0.0437304	0.375902			0.778	0.103547	0.074275	0.0704569	0.117546	0.224452
	0.779	0.037367	0.0819111	0.153182	0.299541	0.349176			0.779	0.074275	0.0475485	0.05773	0.0806384	0.117546			0.779	-0.215898	-0.086084	-0.0313583	0.0437304	0.389902			0.779	0.113728	0.0730023	0.0870019	0.121365	0.225725
	0.78	0.0233674	0.0844565	0.149364	0.303359	0.354267			0.78	0.074275	0.0437304	0.0590027	0.0679115	0.120092			0.78	-0.191717	-0.0848113	-0.0300856	0.0399123	0.39372			0.78	0.117546	0.0679115	0.0768203	0.111183	0.243543
	0.781	0.0386396	0.0857292	0.153182	0.314813	0.351721			0.781	0.0831838	0.0424577	0.0539119	0.0768203	0.131546			0.781	-0.191717	-0.0746297	-0.0377217	0.0462758	0.384811			0.781	0.0959107	0.0844565	0.0870019	0.111183	0.233361
	0.782	0.0488212	0.0857292	0.154454	0.303359	0.350449			0.782	0.0793657	0.0386396	0.0590027	0.0844565	0.120092			0.782	-0.196808	-0.0975382	-0.0275402	0.0526392	0.378448			0.782	0.115001	0.078093	0.0844565	0.106092	0.215543
	0.783	0.0437304	0.0819111	0.154454	0.295723	0.346631			0.783	0.0793657	0.0386396	0.0500939	0.0704569	0.118819			0.783	-0.181536	-0.101356	-0.0288129	0.0513665	0.384811			0.783	0.0933653	0.074275	0.0844565	0.112456	0.235906
	0.784	0.0360943	0.0895472	0.150636	0.299541	0.346631			0.784	0.0755476	0.0360943	0.0437304	0.0806384	0.117546			0.784	-0.198081	-0.0937201	-0.032631	0.0475485	0.363175			0.784	0.107365	0.0806384	0.0768203	0.121365	0.226998
	0.785	0.0335489	0.0806384	0.151909	0.312268	0.355539			0.785	0.0730023	0.037367	0.0551846	0.0819111	0.117546			0.785	-0.185354	-0.0886293	-0.0313583	0.0386396	0.389902			0.785	0.10991	0.078093	0.0895472	0.122637	0.220634
	0.786	0.0462758	0.0806384	0.148091	0.310995	0.368266			0.786	0.0691842	0.0475485	0.0691842	0.0806384	0.12391			0.786	-0.203171	-0.086084	-0.0275402	0.0462758	0.37463			0.786	0.117546	0.0666388	0.0908199	0.12391	0.22827
	0.787	0.0348216	0.078093	0.148091	0.305905	0.345358			0.787	0.0730023	0.0488212	0.05773	0.074275	0.129001			0.787	-0.191717	-0.0784478	-0.0249948	0.0488212	0.369539			0.787	0.111183	0.0806384	0.0793657	0.112456	0.229543
	0.788	0.0424577	0.0831838	0.154454	0.300814	0.36063			0.788	0.074275	0.0284581	0.0564573	0.0819111	0.125183			0.788	-0.187899	-0.0949928	-0.0211768	0.0360943	0.373357			0.788	0.0997288	0.0691842	0.0844565	0.12391	0.212998
	0.789	0.0399123	0.0831838	0.157	0.299541	0.344085			0.789	0.0755476	0.0424577	0.0564573	0.0730023	0.121365			0.789	-0.170081	-0.0937201	-0.0402671	0.0399123	0.379721			0.789	0.106092	0.0819111	0.0908199	0.111183	0.22827
	0.79	0.0335489	0.0793657	0.145546	0.299541	0.364448			0.79	0.0704569	0.041185	0.0640934	0.0831838	0.116274			0.79	-0.190444	-0.0886293	-0.036449	0.0488212	0.389902			0.79	0.116274	0.061548	0.0844565	0.107365	0.237179
	0.791	0.0310035	0.094638	0.159545	0.29445	0.354267			0.791	0.0819111	0.0297308	0.05773	0.0768203	0.129001			0.791	-0.184081	-0.086084	-0.0173587	0.0348216	0.370812			0.791	0.0959107	0.0653661	0.0870019	0.113728	0.234634
	0.792	0.0399123	0.0730023	0.150636	0.307177	0.344085			0.792	0.0844565	0.0424577	0.0488212	0.0831838	0.127728			0.792	-0.185354	-0.105174	-0.0249948	0.0271854	0.359357			0.792	0.103547	0.0755476	0.078093	0.103547	0.22318
	0.793	0.037367	0.0844565	0.148091	0.298268	0.346631			0.793	0.0806384	0.0322762	0.0666388	0.0755476	0.10991			0.793	-0.162445	-0.0835386	-0.0377217	0.0335489	0.372084			0.793	0.111183	0.0666388	0.0844565	0.10991	0.216816
	0.794	0.0360943	0.0857292	0.158273	0.290632	0.349176			0.794	0.0844565	0.0462758	0.0513665	0.0793657	0.120092			0.794	-0.161173	-0.0924474	-0.0262675	0.0513665	0.356812			0.794	0.10991	0.061548	0.0717296	0.104819	0.219362
	0.795	0.0310035	0.0870019	0.146818	0.304632	0.351721			0.795	0.0844565	0.0488212	0.0564573	0.0844565	0.115001			0.795	-0.134446	-0.103902	-0.0402671	0.0322762	0.37463			0.795	0.116274	0.0793657	0.0831838	0.113728	0.218089
	0.796	0.0360943	0.0844565	0.139182	0.312268	0.349176			0.796	0.0831838	0.0386396	0.0526392	0.0857292	0.10991			0.796	-0.150991	-0.086084	-0.032631	0.0271854	0.365721			0.796	0.113728	0.0666388	0.078093	0.125183	0.221907
	0.797	0.0386396	0.0704569	0.144273	0.298268	0.34154			0.797	0.0857292	0.0360943	0.0462758	0.0806384	0.120092			0.797	-0.1599	-0.11281	-0.032631	0.0271854	0.361903			0.797	0.111183	0.0806384	0.0831838	0.118819	0.220634
	0.798	0.0424577	0.0895472	0.146818	0.293178	0.344085			0.798	0.074275	0.0475485	0.0551846	0.0704569	0.120092			0.798	-0.153536	-0.0911747	-0.052994	0.0335489	0.32754			0.798	0.111183	0.0793657	0.0704569	0.103547	0.216816
	0.799	0.0310035	0.0895472	0.139182	0.295723	0.333904			0.799	0.0793657	0.0437304	0.0691842	0.0730023	0.130273			0.799	-0.17899	-0.103902	-0.0275402	0.020822	0.331358			0.799	0.121365	0.0590027	0.0831838	0.10991	0.224452
	0.8	0.0322762	0.0793657	0.141728	0.295723	0.328813			0.8	0.0793657	0.0360943	0.0475485	0.0844565	0.116274			0.8	-0.1739	-0.0835386	-0.0237222	0.0182766	0.330086			0.8	0.0971834	0.0870019	0.078093	0.127728	0.219362
	0.801	0.0259127	0.0882745	0.158273	0.295723	0.336449			0.801	0.0793657	0.0310035	0.0628207	0.0793657	0.131546			0.801	-0.172627	-0.086084	-0.0339037	0.00554971	0.323722			0.801	0.108638	0.0717296	0.0895472	0.111183	0.22318
	0.802	0.0424577	0.0755476	0.140455	0.300814	0.314813			0.802	0.0882745	0.0488212	0.0640934	0.0819111	0.132819			0.802	-0.176445	-0.108992	-0.0580848	0.00936778	0.32754			0.802	0.112456	0.0602754	0.094638	0.10991	0.219362
	0.803	0.0284581	0.078093	0.141728	0.284269	0.30845			0.803	0.0857292	0.0424577	0.0386396	0.0691842	0.10991			0.803	-0.17899	-0.102629	-0.049176	0.0170039	0.284269			0.803	0.117546	0.0679115	0.0768203	0.12391	0.220634
	0.804	0.0322762	0.0806384	0.148091	0.290632	0.303359			0.804	0.0844565	0.0399123	0.0500939	0.078093	0.140455			0.804	-0.175172	-0.0962655	-0.0580848	-0.00717719	0.277905			0.804	0.103547	0.078093	0.0870019	0.106092	0.233361
	0.805	0.0399123	0.0793657	0.155727	0.281723	0.293178			0.805	0.0793657	0.0437304	0.0551846	0.0908199	0.120092			0.805	-0.17899	-0.108992	-0.0351764	0.00300433	0.262633			0.805	0.113728	0.0717296	0.078093	0.112456	0.207907
	0.806	0.0271854	0.0755476	0.153182	0.277905	0.263906			0.806	0.0793657	0.0246401	0.061548	0.0895472	0.121365			0.806	-0.19299	-0.0937201	-0.0555394	-0.00208643	0.211725			0.806	0.106092	0.0819111	0.0857292	0.117546	0.205362
	0.807	0.0386396	0.0793657	0.146818	0.289359	0.262633			0.807	0.0768203	0.0450031	0.0704569	0.0831838	0.115001			0.807	-0.186626	-0.0962655	-0.0631755	-0.016086	0.22318			0.807	0.0844565	0.0717296	0.078093	0.134091	0.211725
	0.808	0.0424577	0.0819111	0.132819	0.266451	0.233361			0.808	0.0882745	0.0475485	0.05773	0.0640934	0.118819			0.808	-0.199353	-0.101356	-0.0555394	-0.0186314	0.167181			0.808	0.112456	0.0679115	0.078093	0.104819	0.220634
	0.809	0.0322762	0.0755476	0.132819	0.267724	0.216816			0.809	0.078093	0.037367	0.0424577	0.0691842	0.121365			0.809	-0.184081	-0.089902	-0.0593575	-0.0237222	0.164636			0.809	0.121365	0.0882745	0.0793657	0.10991	0.210453
	0.81	0.0348216	0.0870019	0.143	0.267724	0.201544			0.81	0.0831838	0.0488212	0.0462758	0.0870019	0.134091			0.81	-0.168809	-0.0975382	-0.0580848	-0.0275402	0.106092			0.81	0.113728	0.0704569	0.0908199	0.120092	0.211725
	0.811	0.0335489	0.0793657	0.135364	0.251179	0.182454			0.811	0.074275	0.0284581	0.0539119	0.0844565	0.130273			0.811	-0.195535	-0.0962655	-0.0746297	-0.0199041	0.0564573			0.811	0.112456	0.0666388	0.0819111	0.104819	0.230816
	0.812	0.0386396	0.0831838	0.131546	0.260088	0.159545			0.812	0.0793657	0.0322762	0.05773	0.0857292	0.130273			0.812	-0.186626	-0.0937201	-0.0848113	-0.0288129	0.0170039			0.812	0.10991	0.0679115	0.0717296	0.104819	0.229543
	0.813	0.0360943	0.0768203	0.129001	0.239725	0.143			0.813	0.074275	0.0437304	0.061548	0.0844565	0.115001			0.813	-0.17899	-0.0937201	-0.0644482	-0.0377217	-0.0199041			0.813	0.107365	0.0691842	0.0882745	0.10991	0.210453
	0.814	0.0360943	0.0704569	0.131546	0.252451	0.134091			0.814	0.078093	0.0386396	0.0628207	0.0831838	0.118819			0.814	-0.172627	-0.100084	-0.0822659	-0.0479033	-0.0759024			0.814	0.117546	0.0831838	0.0920926	0.117546	0.230816
	0.815	0.0271854	0.074275	0.129001	0.252451	0.101001			0.815	0.0882745	0.0399123	0.0500939	0.078093	0.135364			0.815	-0.190444	-0.11281	-0.069539	-0.0517213	-0.134446			0.815	0.0971834	0.0590027	0.0857292	0.0984561	0.22318
	0.816	0.0335489	0.0857292	0.130273	0.237179	0.0984561			0.816	0.0882745	0.041185	0.05773	0.0882745	0.129001			0.816	-0.184081	-0.0886293	-0.086084	-0.0389944	-0.182808			0.816	0.107365	0.0920926	0.078093	0.113728	0.206635
	0.817	0.0335489	0.0730023	0.134091	0.232089	0.078093			0.817	0.0717296	0.0386396	0.0628207	0.0844565	0.134091			0.817	-0.181536	-0.100084	-0.0911747	-0.0720844	-0.229898			0.817	0.118819	0.0717296	0.074275	0.108638	0.211725
	0.818	0.037367	0.0704569	0.120092	0.234634	0.0640934			0.818	0.0806384	0.0360943	0.0539119	0.0895472	0.113728			0.818	-0.170081	-0.114083	-0.0848113	-0.0555394	-0.290987			0.818	0.0959107	0.074275	0.0971834	0.10991	0.206635
	0.819	0.0284581	0.0730023	0.131546	0.22318	0.0437304			0.819	0.0755476	0.05773	0.0526392	0.0717296	0.120092			0.819	-0.168809	-0.0937201	-0.108992	-0.0784478	-0.343167			0.819	0.106092	0.0730023	0.0831838	0.101001	0.226998
	0.82	0.0399123	0.0717296	0.121365	0.216816	0.0348216			0.82	0.0870019	0.0310035	0.0640934	0.0793657	0.135364			0.82	-0.164991	-0.106447	-0.0937201	-0.0886293	-0.414438			0.82	0.120092	0.0819111	0.0691842	0.115001	0.205362
	0.821	0.0220947	0.0717296	0.121365	0.196453	0.00809509			0.821	0.0691842	0.0437304	0.0564573	0.0704569	0.130273			0.821	-0.164991	-0.111538	-0.108992	-0.0708117	-0.472982			0.821	0.108638	0.0806384	0.0717296	0.10991	0.206635
	0.822	0.0246401	0.0640934	0.126455	0.191362	-0.0059045			0.822	0.0730023	0.0424577	0.0602754	0.0806384	0.135364			0.822	-0.163718	-0.105174	-0.114083	-0.086084	-0.522617			0.822	0.111183	0.074275	0.094638	0.112456	0.215543
	0.823	0.0322762	0.0640934	0.129001	0.197726	-0.0275402			0.823	0.0691842	0.0488212	0.0539119	0.0908199	0.125183			0.823	-0.180263	-0.117901	-0.129355	-0.089902	-0.583706			0.823	0.104819	0.0793657	0.0933653	0.117546	0.193908
	0.824	0.0271854	0.0755476	0.115001	0.195181	-0.0466306			0.824	0.0882745	0.0271854	0.0475485	0.0691842	0.125183			0.824	-0.170081	-0.0848113	-0.108992	-0.108992	-0.66134			0.824	0.103547	0.0704569	0.0730023	0.106092	0.215543
	0.825	0.0284581	0.0640934	0.115001	0.17609	-0.069539			0.825	0.0704569	0.0450031	0.0488212	0.0730023	0.12391			0.825	-0.186626	-0.0924474	-0.100084	-0.0937201	-0.703338			0.825	0.101001	0.0844565	0.0717296	0.118819	0.210453
	0.826	0.0131859	0.0551846	0.121365	0.168454	-0.0784478			0.826	0.0602754	0.0399123	0.0590027	0.0882745	0.130273			0.826	-0.171354	-0.108992	-0.117901	-0.0962655	-0.758064			0.826	0.10991	0.0730023	0.0819111	0.0984561	0.198998
	0.827	0.0310035	0.0666388	0.115001	0.167181	-0.102629			0.827	0.0844565	0.0437304	0.0513665	0.0666388	0.126455			0.827	-0.164991	-0.108992	-0.117901	-0.11281	-0.810244			0.827	0.108638	0.0666388	0.0831838	0.0984561	0.211725
	0.828	0.0233674	0.0691842	0.112456	0.163363	-0.110265			0.828	0.0704569	0.0462758	0.0539119	0.0806384	0.113728			0.828	-0.176445	-0.101356	-0.116628	-0.117901	-0.866243			0.828	0.108638	0.0819111	0.0730023	0.106092	0.211725
	0.829	0.037367	0.05773	0.104819	0.150636	-0.120447			0.829	0.0640934	0.0360943	0.0462758	0.0793657	0.111183			0.829	-0.164991	-0.103902	-0.106447	-0.110265	-0.899333			0.829	0.118819	0.0717296	0.0895472	0.120092	0.215543
	0.83	0.0259127	0.0628207	0.117546	0.139182	-0.148446			0.83	0.061548	0.0450031	0.0539119	0.0819111	0.116274			0.83	-0.163718	-0.103902	-0.122992	-0.111538	-0.929877			0.83	0.0997288	0.0640934	0.0806384	0.121365	0.196453
	0.831	0.0170039	0.0628207	0.106092	0.129001	-0.144628			0.831	0.0730023	0.037367	0.0551846	0.0806384	0.125183			0.831	-0.157355	-0.102629	-0.106447	-0.119174	-0.965512			0.831	0.107365	0.0551846	0.0920926	0.118819	0.198998
	0.832	0.0322762	0.0793657	0.102274	0.135364	-0.156082			0.832	0.0768203	0.037367	0.0513665	0.0730023	0.108638			0.832	-0.157355	-0.0988109	-0.110265	-0.119174	-0.961695			0.832	0.111183	0.0806384	0.0691842	0.0959107	0.201544
	0.833	0.0297308	0.0653661	0.108638	0.120092	-0.1599			0.833	0.0768203	0.0348216	0.0513665	0.0895472	0.10991			0.833	-0.180263	-0.128083	-0.114083	-0.120447	-1.01133			0.833	0.108638	0.0730023	0.0793657	0.118819	0.202817
	0.834	0.0348216	0.0666388	0.117546	0.107365	-0.17899			0.834	0.103547	0.0386396	0.0526392	0.0806384	0.120092			0.834	-0.162445	-0.114083	-0.10772	-0.111538	-1.02278			0.834	0.127728	0.0666388	0.0793657	0.103547	0.204089
	0.835	0.0284581	0.0590027	0.111183	0.103547	-0.170081			0.835	0.101001	0.0437304	0.0475485	0.0831838	0.120092			0.835	-0.161173	-0.106447	-0.0809932	-0.129355	-1.02533			0.835	0.10991	0.0730023	0.0704569	0.0997288	0.204089
	0.836	0.0335489	0.0691842	0.112456	0.104819	-0.17899			0.836	0.0908199	0.0437304	0.0424577	0.0730023	0.111183			0.836	-0.172627	-0.130628	-0.0988109	-0.108992	-1.01515			0.836	0.101001	0.0730023	0.061548	0.113728	0.20918
	0.837	0.0297308	0.0653661	0.0984561	0.0857292	-0.17899			0.837	0.0971834	0.0271854	0.0691842	0.0793657	0.10991			0.837	-0.162445	-0.110265	-0.100084	-0.105174	-0.998602			0.837	0.112456	0.0882745	0.0653661	0.111183	0.204089
	0.838	0.0271854	0.0602754	0.102274	0.0971834	-0.182808			0.838	0.0908199	0.0335489	0.0462758	0.078093	0.117546			0.838	-0.147173	-0.11281	-0.103902	-0.0988109	-0.984603			0.838	0.103547	0.0755476	0.0819111	0.0971834	0.207907
	0.839	0.0335489	0.05773	0.125183	0.0806384	-0.176445			0.839	0.0870019	0.0437304	0.0564573	0.0933653	0.116274			0.839	-0.163718	-0.10772	-0.0822659	-0.0822659	-0.965512			0.839	0.116274	0.0895472	0.0831838	0.104819	0.193908
	0.84	0.0335489	0.0691842	0.104819	0.0564573	-0.186626			0.84	0.0857292	0.037367	0.0526392	0.0691842	0.107365			0.84	-0.153536	-0.119174	-0.086084	-0.0988109	-0.937513			0.84	0.102274	0.078093	0.074275	0.0920926	0.201544
	0.841	0.0462758	0.078093	0.103547	0.0653661	-0.164991			0.841	0.0768203	0.0259127	0.0628207	0.0755476	0.125183			0.841	-0.143355	-0.10772	-0.0937201	-0.0822659	-0.894242			0.841	0.103547	0.074275	0.0755476	0.122637	0.201544
	0.842	0.0233674	0.0666388	0.10991	0.0526392	-0.163718			0.842	0.0640934	0.0475485	0.0500939	0.0730023	0.115001			0.842	-0.138264	-0.122992	-0.0835386	-0.0822659	-0.872606			0.842	0.112456	0.0730023	0.0704569	0.108638	0.196453
	0.843	0.037367	0.0691842	0.10991	0.0602754	-0.1599			0.843	0.0870019	0.0513665	0.0679115	0.0844565	0.107365			0.843	-0.143355	-0.103902	-0.0835386	-0.0784478	-0.828062			0.843	0.112456	0.0730023	0.0640934	0.113728	0.197726
	0.844	0.0437304	0.0793657	0.117546	0.05773	-0.154809			0.844	0.0691842	0.0348216	0.0462758	0.0793657	0.121365			0.844	-0.150991	-0.108992	-0.0784478	-0.0848113	-0.806426			0.844	0.107365	0.074275	0.0831838	0.107365	0.197726
	0.845	0.0297308	0.0768203	0.112456	0.05773	-0.148446			0.845	0.0768203	0.0195493	0.0526392	0.0691842	0.115001			0.845	-0.162445	-0.103902	-0.0720844	-0.0669936	-0.76061			0.845	0.106092	0.0704569	0.0640934	0.102274	0.205362
	0.846	0.0437304	0.0717296	0.102274	0.0551846	-0.135719			0.846	0.0806384	0.0335489	0.0539119	0.078093	0.130273			0.846	-0.149718	-0.117901	-0.0682663	-0.069539	-0.691884			0.846	0.0997288	0.0640934	0.0730023	0.111183	0.187544
	0.847	0.0310035	0.0628207	0.126455	0.0628207	-0.130628			0.847	0.0768203	0.037367	0.0551846	0.074275	0.125183			0.847	-0.150991	-0.114083	-0.0886293	-0.052994	-0.689339			0.847	0.104819	0.0602754	0.0895472	0.112456	0.191362
	0.848	0.0386396	0.0717296	0.108638	0.0526392	-0.122992			0.848	0.0933653	0.0399123	0.0399123	0.0819111	0.108638			0.848	-0.154809	-0.0988109	-0.073357	-0.0428125	-0.625704			0.848	0.104819	0.0730023	0.078093	0.101001	0.201544
	0.849	0.0399123	0.0768203	0.104819	0.0500939	-0.110265			0.849	0.0793657	0.0386396	0.0488212	0.0819111	0.117546			0.849	-0.164991	-0.106447	-0.0797205	-0.0555394	-0.597705			0.849	0.116274	0.074275	0.061548	0.102274	0.188817
	0.85	0.0360943	0.0768203	0.118819	0.05773	-0.11281			0.85	0.0717296	0.0271854	0.0526392	0.0806384	0.0997288			0.85	-0.156082	-0.103902	-0.0542667	-0.049176	-0.56207			0.85	0.120092	0.0628207	0.0870019	0.117546	0.195181
	0.851	0.037367	0.0679115	0.108638	0.0564573	-0.0988109			0.851	0.0768203	0.0399123	0.061548	0.0666388	0.125183			0.851	-0.175172	-0.0949928	-0.0644482	-0.0351764	-0.522617			0.851	0.12391	0.0793657	0.0640934	0.104819	0.198998
	0.852	0.0386396	0.0666388	0.107365	0.0691842	-0.0911747			0.852	0.0755476	0.0386396	0.0602754	0.0819111	0.118819			0.852	-0.153536	-0.102629	-0.0619029	-0.0339037	-0.486981			0.852	0.108638	0.0755476	0.0717296	0.104819	0.187544
	0.853	0.0386396	0.0831838	0.117546	0.05773	-0.0759024			0.853	0.0793657	0.0450031	0.041185	0.0831838	0.112456			0.853	-0.164991	-0.106447	-0.069539	-0.049176	-0.461527			0.853	0.113728	0.0806384	0.0793657	0.094638	0.186272
	0.854	0.0386396	0.05773	0.116274	0.0755476	-0.0593575			0.854	0.0704569	0.0310035	0.0500939	0.0857292	0.112456			0.854	-0.163718	-0.089902	-0.0644482	-0.052994	-0.444982			0.854	0.108638	0.0666388	0.0666388	0.103547	0.193908
	0.855	0.0335489	0.0564573	0.120092	0.0819111	-0.0631755			0.855	0.0793657	0.037367	0.0526392	0.0755476	0.116274			0.855	-0.148446	-0.0988109	-0.0580848	-0.032631	-0.409347			0.855	0.120092	0.0691842	0.078093	0.104819	0.195181
	0.856	0.0360943	0.074275	0.108638	0.0793657	-0.052994			0.856	0.0857292	0.0424577	0.0539119	0.0628207	0.107365			0.856	-0.144628	-0.0962655	-0.0657209	-0.0339037	-0.382621			0.856	0.120092	0.0691842	0.0806384	0.103547	0.192635
	0.857	0.0399123	0.0755476	0.108638	0.0844565	-0.049176			0.857	0.0819111	0.0386396	0.0437304	0.0768203	0.113728			0.857	-0.154809	-0.0962655	-0.0606302	-0.0288129	-0.350803			0.857	0.0997288	0.0857292	0.0717296	0.108638	0.193908
	0.858	0.0284581	0.0704569	0.120092	0.0920926	-0.0313583			0.858	0.0768203	0.0284581	0.0590027	0.0857292	0.120092			0.858	-0.154809	-0.117901	-0.0720844	-0.0377217	-0.326622			0.858	0.106092	0.0717296	0.0679115	0.094638	0.205362
	0.859	0.037367	0.0730023	0.120092	0.106092	-0.0211768			0.859	0.0768203	0.0386396	0.0437304	0.0730023	0.129001			0.859	-0.163718	-0.0937201	-0.0555394	-0.0300856	-0.312623			0.859	0.108638	0.0640934	0.078093	0.106092	0.193908
	0.86	0.0335489	0.0704569	0.113728	0.0984561	-0.0224495			0.86	0.0806384	0.0450031	0.0526392	0.0691842	0.115001			0.86	-0.153536	-0.0962655	-0.052994	-0.0211768	-0.288442			0.86	0.111183	0.0704569	0.0717296	0.118819	0.186272
	0.861	0.0335489	0.0844565	0.115001	0.0959107	-0.0109953			0.861	0.0640934	0.041185	0.0488212	0.0679115	0.125183			0.861	-0.158627	-0.0809932	-0.0580848	-0.0173587	-0.251534			0.861	0.101001	0.0640934	0.0844565	0.103547	0.188817
	0.862	0.0259127	0.0730023	0.111183	0.115001	-0.00463181			0.862	0.0908199	0.0424577	0.0564573	0.0831838	0.10991			0.862	-0.161173	-0.106447	-0.049176	-0.0186314	-0.229898			0.862	0.10991	0.0793657	0.0793657	0.111183	0.187544
	0.863	0.037367	0.0793657	0.117546	0.120092	0.0131859			0.863	0.078093	0.0360943	0.0526392	0.0831838	0.120092			0.863	-0.163718	-0.110265	-0.0580848	-0.0109953	-0.228625			0.863	0.0984561	0.0679115	0.0704569	0.0997288	0.186272
	0.864	0.0322762	0.0691842	0.121365	0.103547	0.0170039			0.864	0.0679115	0.0335489	0.0500939	0.0793657	0.129001			0.864	-0.157355	-0.0835386	-0.0555394	-0.0275402	-0.210808			0.864	0.102274	0.0679115	0.0704569	0.103547	0.193908
	0.865	0.0220947	0.0844565	0.120092	0.127728	0.0170039			0.865	0.0704569	0.0386396	0.0551846	0.0857292	0.122637			0.865	-0.149718	-0.089902	-0.0580848	-0.0237222	-0.180263			0.865	0.10991	0.0602754	0.0666388	0.107365	0.188817
	0.866	0.0386396	0.0768203	0.121365	0.130273	0.0386396			0.866	0.0971834	0.0539119	0.0462758	0.0793657	0.130273			0.866	-0.133174	-0.0873566	-0.0542667	-0.0211768	-0.17899			0.866	0.104819	0.0730023	0.0959107	0.0933653	0.184999
	0.867	0.0360943	0.0691842	0.117546	0.135364	0.0386396			0.867	0.0882745	0.0348216	0.0539119	0.0768203	0.116274			0.867	-0.12681	-0.0962655	-0.0644482	-0.0122679	-0.150991			0.867	0.112456	0.0730023	0.0704569	0.108638	0.193908
	0.868	0.0233674	0.074275	0.125183	0.130273	0.0450031			0.868	0.0768203	0.0271854	0.0450031	0.0844565	0.117546			0.868	-0.122992	-0.114083	-0.0504486	-0.0109953	-0.147173			0.868	0.113728	0.0793657	0.0730023	0.115001	0.195181
	0.869	0.0399123	0.0717296	0.10991	0.137909	0.0488212			0.869	0.0755476	0.0475485	0.0590027	0.0844565	0.116274			0.869	-0.12681	-0.086084	-0.0580848	-0.0135406	-0.134446			0.869	0.094638	0.0844565	0.0691842	0.106092	0.210453
	0.87	0.0386396	0.0666388	0.129001	0.137909	0.0513665			0.87	0.0895472	0.0386396	0.05773	0.0755476	0.118819			0.87	-0.086084	-0.0937201	-0.0619029	-0.0173587	-0.122992			0.87	0.118819	0.0717296	0.0590027	0.0933653	0.188817
	0.871	0.0310035	0.078093	0.122637	0.136637	0.0628207			0.871	0.078093	0.0399123	0.0564573	0.0691842	0.121365			0.871	-0.0644482	-0.100084	-0.0644482	-0.0122679	-0.114083			0.871	0.107365	0.0768203	0.0730023	0.120092	0.192635
	0.872	0.0297308	0.0844565	0.113728	0.144273	0.0628207			0.872	0.0768203	0.037367	0.0475485	0.0819111	0.12391			0.872	-0.0580848	-0.0962655	-0.0555394	-0.00844988	-0.086084			0.872	0.12391	0.05773	0.0590027	0.113728	0.187544
	0.873	0.0360943	0.0768203	0.117546	0.149364	0.0793657			0.873	0.0844565	0.0233674	0.0437304	0.074275	0.121365			0.873	-0.0949928	-0.089902	-0.0568121	-0.00717719	-0.0822659			0.873	0.0933653	0.074275	0.0602754	0.102274	0.212998
	0.874	0.0399123	0.0717296	0.12391	0.144273	0.074275			0.874	0.0844565	0.041185	0.0590027	0.0844565	0.122637			0.874	-0.115356	-0.110265	-0.0580848	-0.016086	-0.069539			0.874	0.107365	0.0819111	0.078093	0.0984561	0.195181
	0.875	0.041185	0.0844565	0.113728	0.150636	0.0984561			0.875	0.0870019	0.0386396	0.061548	0.0806384	0.117546			0.875	-0.108992	-0.0975382	-0.0568121	-0.00717719	-0.0644482			0.875	0.104819	0.0806384	0.0730023	0.104819	0.202817
	0.876	0.0386396	0.074275	0.12391	0.163363	0.0920926			0.876	0.0844565	0.0322762	0.0526392	0.0959107	0.129001			0.876	-0.114083	-0.102629	-0.049176	0.00300433	-0.0568121			0.876	0.103547	0.074275	0.0602754	0.101001	0.188817
	0.877	0.0284581	0.0628207	0.115001	0.159545	0.0857292			0.877	0.0984561	0.0399123	0.0666388	0.0870019	0.127728			0.877	-0.131901	-0.0949928	-0.0504486	-0.0199041	-0.0517213			0.877	0.0971834	0.0831838	0.0717296	0.107365	0.206635
	0.878	0.0386396	0.074275	0.118819	0.160818	0.108638			0.878	0.0831838	0.0360943	0.0564573	0.0704569	0.129001			0.878	-0.119174	-0.102629	-0.0619029	-0.0249948	-0.0288129			0.878	0.115001	0.0806384	0.0691842	0.104819	0.197726
	0.879	0.0348216	0.0717296	0.135364	0.174817	0.104819			0.879	0.0857292	0.041185	0.0526392	0.0971834	0.120092			0.879	-0.12681	-0.0962655	-0.0580848	-0.0237222	-0.0237222			0.879	0.10991	0.0628207	0.0831838	0.102274	0.198998
	0.88	0.0246401	0.0679115	0.111183	0.174817	0.103547			0.88	0.0895472	0.0335489	0.0462758	0.0844565	0.125183			0.88	-0.122992	-0.103902	-0.073357	-0.0173587	-0.00717719			0.88	0.0997288	0.0730023	0.0870019	0.0984561	0.196453
	0.881	0.0551846	0.0831838	0.150636	0.157	0.113728			0.881	0.0870019	0.0513665	0.0475485	0.078093	0.132819			0.881	-0.125537	-0.105174	-0.0517213	-0.00208643	-0.0173587			0.881	0.107365	0.0730023	0.0628207	0.108638	0.201544
	0.882	0.0271854	0.0755476	0.118819	0.169727	0.120092			0.882	0.078093	0.0386396	0.0475485	0.0959107	0.104819			0.882	-0.12681	-0.0962655	-0.052994	-0.00717719	0.00173164			0.882	0.0959107	0.0717296	0.0768203	0.121365	0.195181
	0.883	0.0399123	0.074275	0.137909	0.179908	0.12391			0.883	0.0870019	0.0271854	0.0590027	0.0768203	0.130273			0.883	-0.143355	-0.089902	-0.0759024	0.00554971	0.00427702			0.883	0.118819	0.061548	0.0895472	0.120092	0.195181
	0.884	0.037367	0.0679115	0.108638	0.167181	0.137909			0.884	0.0920926	0.0386396	0.0526392	0.0755476	0.10991			0.884	-0.129355	-0.100084	-0.0580848	-0.00208643	0.0233674			0.884	0.118819	0.074275	0.0755476	0.101001	0.201544
	0.885	0.0399123	0.0691842	0.120092	0.179908	0.127728			0.885	0.0717296	0.041185	0.0628207	0.0920926	0.129001			0.885	-0.121719	-0.106447	-0.049176	-0.0109953	0.0386396			0.885	0.122637	0.0640934	0.0602754	0.0959107	0.205362
	0.886	0.0348216	0.0831838	0.121365	0.178636	0.144273			0.886	0.078093	0.0399123	0.0526392	0.0933653	0.120092			0.886	-0.136991	-0.106447	-0.0644482	-0.00844988	0.0182766			0.886	0.111183	0.0666388	0.0806384	0.113728	0.195181
	0.887	0.037367	0.0717296	0.113728	0.184999	0.154454			0.887	0.0882745	0.0284581	0.05773	0.074275	0.120092			0.887	-0.117901	-0.0962655	-0.0453579	0.0068224	0.0335489			0.887	0.111183	0.078093	0.0717296	0.094638	0.220634
	0.888	0.0399123	0.0704569	0.115001	0.188817	0.150636			0.888	0.0857292	0.0475485	0.0526392	0.0806384	0.120092			0.888	-0.116628	-0.0962655	-0.052994	-0.0173587	0.0475485			0.888	0.103547	0.0653661	0.0717296	0.113728	0.196453
	0.889	0.0386396	0.0831838	0.120092	0.184999	0.158273			0.889	0.078093	0.0322762	0.0513665	0.094638	0.127728			0.889	-0.125537	-0.0924474	-0.0517213	-0.0224495	0.0284581			0.889	0.111183	0.0704569	0.0704569	0.104819	0.183726
	0.89	0.0424577	0.078093	0.117546	0.181181	0.150636			0.89	0.0793657	0.0424577	0.061548	0.0857292	0.126455			0.89	-0.122992	-0.103902	-0.0542667	0.0068224	0.0564573			0.89	0.120092	0.0679115	0.0666388	0.107365	0.202817
	0.891	0.0322762	0.0730023	0.130273	0.184999	0.174817			0.891	0.0793657	0.0424577	0.0488212	0.0870019	0.121365			0.891	-0.130628	-0.120447	-0.069539	-0.0122679	0.05773			0.891	0.10991	0.0870019	0.074275	0.101001	0.198998
	0.892	0.0462758	0.0653661	0.122637	0.187544	0.165909			0.892	0.0882745	0.0450031	0.0386396	0.0882745	0.127728			0.892	-0.124265	-0.089902	-0.0580848	-0.0199041	0.0640934			0.892	0.115001	0.0704569	0.0691842	0.103547	0.183726
	0.893	0.0195493	0.0730023	0.132819	0.202817	0.17609			0.893	0.0844565	0.0284581	0.0526392	0.0666388	0.125183			0.893	-0.0988109	-0.0962655	-0.032631	-0.0148133	0.078093			0.893	0.107365	0.0768203	0.0679115	0.107365	0.196453
	0.894	0.0424577	0.0831838	0.120092	0.179908	0.168454			0.894	0.0831838	0.0424577	0.05773	0.0844565	0.122637			0.894	-0.108992	-0.0924474	-0.0580848	0.00300433	0.0730023			0.894	0.121365	0.0806384	0.0730023	0.10991	0.19009
	0.895	0.0437304	0.0755476	0.126455	0.19009	0.174817			0.895	0.0819111	0.0437304	0.0551846	0.0870019	0.094638			0.895	-0.115356	-0.108992	-0.049176	0.00300433	0.0806384			0.895	0.111183	0.0640934	0.0793657	0.115001	0.197726
	0.896	0.0437304	0.0870019	0.113728	0.187544	0.181181			0.896	0.0844565	0.0322762	0.0488212	0.0793657	0.131546			0.896	-0.11281	-0.108992	-0.0568121	-0.00335912	0.0730023			0.896	0.10991	0.0730023	0.0717296	0.0882745	0.192635
	0.897	0.0271854	0.0691842	0.116274	0.202817	0.188817			0.897	0.0691842	0.0437304	0.0590027	0.0857292	0.126455			0.897	-0.111538	-0.0937201	-0.049176	-0.00844988	0.0793657			0.897	0.0959107	0.0870019	0.0755476	0.112456	0.187544
	0.898	0.0462758	0.0844565	0.120092	0.192635	0.192635			0.898	0.0768203	0.037367	0.0526392	0.0793657	0.122637			0.898	-0.101356	-0.0848113	-0.052994	-0.00208643	0.0984561			0.898	0.121365	0.074275	0.0971834	0.113728	0.201544
	0.899	0.0335489	0.0768203	0.121365	0.206635	0.182454			0.899	0.0793657	0.0360943	0.0551846	0.0768203	0.10991			0.899	-0.103902	-0.0924474	-0.0568121	-0.00463181	0.111183			0.899	0.0984561	0.0691842	0.0730023	0.111183	0.191362
	0.9	0.0437304	0.078093	0.115001	0.211725	0.188817			0.9	0.0882745	0.0386396	0.0488212	0.0704569	0.120092			0.9	-0.105174	-0.102629	-0.052994	-0.00844988	0.106092			0.9	0.112456	0.0730023	0.0602754	0.0997288	0.187544
	0.901	0.0322762	0.0730023	0.120092	0.196453	0.202817			0.901	0.0882745	0.037367	0.0488212	0.078093	0.112456			0.901	-0.105174	-0.102629	-0.0568121	0.00554971	0.104819			0.901	0.104819	0.0602754	0.0730023	0.0920926	0.186272
	0.902	0.0335489	0.0679115	0.113728	0.198998	0.201544			0.902	0.0793657	0.0284581	0.0602754	0.0806384	0.134091			0.902	-0.102629	-0.0937201	-0.0555394	-0.00463181	0.113728			0.902	0.117546	0.0640934	0.074275	0.107365	0.193908
	0.903	0.0348216	0.0717296	0.121365	0.191362	0.205362			0.903	0.0908199	0.0386396	0.0462758	0.0730023	0.129001			0.903	-0.111538	-0.10772	-0.0555394	-0.00335912	0.0984561			0.903	0.10991	0.0666388	0.0640934	0.103547	0.168454
	0.904	0.0322762	0.0640934	0.121365	0.192635	0.200271			0.904	0.0768203	0.0475485	0.0590027	0.0831838	0.120092			0.904	-0.117901	-0.101356	-0.0504486	0.00554971	0.116274			0.904	0.111183	0.0628207	0.0640934	0.0984561	0.19009
	0.905	0.0310035	0.0628207	0.127728	0.192635	0.20918			0.905	0.0793657	0.037367	0.0551846	0.0870019	0.108638			0.905	-0.129355	-0.089902	-0.0542667	0.000458949	0.136637			0.905	0.0997288	0.0768203	0.0640934	0.111183	0.202817
	0.906	0.0322762	0.0819111	0.115001	0.197726	0.202817			0.906	0.0793657	0.0322762	0.0551846	0.0730023	0.126455			0.906	-0.124265	-0.0797205	-0.0415398	-0.00844988	0.145546			0.906	0.101001	0.074275	0.0730023	0.0984561	0.204089
	0.907	0.037367	0.0717296	0.125183	0.196453	0.204089			0.907	0.0831838	0.0335489	0.0513665	0.074275	0.116274			0.907	-0.119174	-0.105174	-0.0580848	-0.00717719	0.132819			0.907	0.112456	0.078093	0.0666388	0.112456	0.179908
	0.908	0.0360943	0.0755476	0.118819	0.186272	0.195181			0.908	0.0844565	0.0322762	0.0590027	0.0882745	0.117546			0.908	-0.1459	-0.111538	-0.0466306	0.000458949	0.130273			0.908	0.0959107	0.0844565	0.0640934	0.111183	0.191362
	0.909	0.0399123	0.074275	0.101001	0.207907	0.206635			0.909	0.0844565	0.0462758	0.0500939	0.0793657	0.107365			0.909	-0.119174	-0.103902	-0.069539	0.00554971	0.136637			0.909	0.0984561	0.0653661	0.0882745	0.115001	0.19009
	0.91	0.0297308	0.0640934	0.117546	0.192635	0.201544			0.91	0.0844565	0.0335489	0.0691842	0.078093	0.121365			0.91	-0.134446	-0.100084	-0.049176	0.00300433	0.140455			0.91	0.117546	0.0730023	0.0768203	0.115001	0.181181
	0.911	0.0348216	0.0768203	0.12391	0.206635	0.212998			0.911	0.0844565	0.0450031	0.0424577	0.0717296	0.120092			0.911	-0.124265	-0.0835386	-0.0542667	0.0131859	0.145546			0.911	0.101001	0.0768203	0.0806384	0.0908199	0.192635
	0.912	0.0500939	0.0755476	0.112456	0.195181	0.196453			0.912	0.0793657	0.0310035	0.0335489	0.0653661	0.120092			0.912	-0.136991	-0.0886293	-0.0631755	0.00300433	0.131546			0.912	0.120092	0.0806384	0.0691842	0.0933653	0.195181
	0.913	0.0360943	0.0755476	0.116274	0.191362	0.195181			0.913	0.0870019	0.0551846	0.05773	0.0844565	0.120092			0.913	-0.128083	-0.0886293	-0.0580848	0.00173164	0.146818			0.913	0.10991	0.0602754	0.078093	0.0984561	0.182454
	0.914	0.0322762	0.0730023	0.108638	0.188817	0.198998			0.914	0.0730023	0.0386396	0.0437304	0.0717296	0.0984561			0.914	-0.133174	-0.0975382	-0.0453579	0.00173164	0.150636			0.914	0.10991	0.0831838	0.0602754	0.106092	0.173545
	0.915	0.0399123	0.0691842	0.118819	0.188817	0.193908			0.915	0.0870019	0.0399123	0.0640934	0.0755476	0.116274			0.915	-0.138264	-0.105174	-0.0479033	0.00300433	0.153182			0.915	0.108638	0.0539119	0.061548	0.0933653	0.169727
	0.916	0.0488212	0.0844565	0.121365	0.192635	0.186272			0.916	0.0933653	0.0360943	0.0450031	0.0653661	0.12391			0.916	-0.144628	-0.0988109	-0.0580848	-0.00208643	0.149364			0.916	0.120092	0.0679115	0.0666388	0.0984561	0.188817
	0.917	0.0360943	0.0653661	0.113728	0.183726	0.192635			0.917	0.0831838	0.0322762	0.0437304	0.074275	0.12391			0.917	-0.144628	-0.0962655	-0.0593575	0.00300433	0.151909			0.917	0.102274	0.0640934	0.0793657	0.0908199	0.181181
	0.918	0.0310035	0.0691842	0.120092	0.181181	0.181181			0.918	0.0831838	0.0386396	0.0437304	0.0691842	0.121365			0.918	-0.12681	-0.106447	-0.0542667	0.00809509	0.139182			0.918	0.0895472	0.0768203	0.0870019	0.107365	0.19009
	0.919	0.0475485	0.078093	0.120092	0.200271	0.179908			0.919	0.0831838	0.0488212	0.05773	0.078093	0.107365			0.919	-0.156082	-0.10772	-0.0568121	0.0131859	0.160818			0.919	0.121365	0.0831838	0.0717296	0.0959107	0.19009
	0.92	0.0424577	0.0691842	0.120092	0.19009	0.181181			0.92	0.0895472	0.0399123	0.0424577	0.061548	0.107365			0.92	-0.154809	-0.105174	-0.0555394	-0.000813741	0.160818			0.92	0.121365	0.0551846	0.0590027	0.107365	0.177363
	0.921	0.0437304	0.0704569	0.125183	0.174817	0.181181			0.921	0.078093	0.0335489	0.0602754	0.0730023	0.122637			0.921	-0.136991	-0.0949928	-0.0428125	-0.00335912	0.150636			0.921	0.116274	0.061548	0.0691842	0.108638	0.172272
	0.922	0.0284581	0.0628207	0.094638	0.19009	0.178636			0.922	0.0730023	0.0322762	0.0539119	0.0691842	0.117546			0.922	-0.150991	-0.0924474	-0.0428125	0.00427702	0.179908			0.922	0.117546	0.0704569	0.0768203	0.0882745	0.179908
	0.923	0.0386396	0.0806384	0.113728	0.178636	0.186272			0.923	0.0870019	0.0360943	0.0513665	0.0819111	0.108638			0.923	-0.156082	-0.100084	-0.0453579	-0.00208643	0.154454			0.923	0.0997288	0.0793657	0.0793657	0.0895472	0.178636
	0.924	0.0450031	0.0691842	0.108638	0.186272	0.170999			0.924	0.0819111	0.0360943	0.05773	0.0704569	0.116274			0.924	-0.144628	-0.0975382	-0.0440852	0.0182766	0.172272			0.924	0.0933653	0.0806384	0.078093	0.0920926	0.178636
	0.925	0.0233674	0.0704569	0.132819	0.179908	0.181181			0.925	0.0844565	0.0424577	0.0437304	0.0717296	0.094638			0.925	-0.144628	-0.0962655	-0.0428125	-0.00335912	0.173545			0.925	0.107365	0.0857292	0.0653661	0.104819	0.178636
	0.926	0.0360943	0.0653661	0.115001	0.178636	0.168454			0.926	0.0691842	0.0424577	0.0526392	0.0691842	0.125183			0.926	-0.142082	-0.10772	-0.0720844	-0.00717719	0.164636			0.926	0.094638	0.061548	0.0628207	0.122637	-1.78513
	0.927	0.0360943	0.074275	0.107365	0.182454	0.159545			0.927	0.0870019	0.0348216	0.0513665	0.0704569	0.113728			0.927	-0.136991	-0.0975382	-0.0440852	-0.00208643	0.164636			0.927	0.117546	0.0768203	0.0691842	0.107365	-4.59904
	0.928	0.0424577	0.0730023	0.125183	0.165909	0.183726			0.928	0.0870019	0.0488212	0.0488212	0.0755476	0.102274			0.928	-0.156082	-0.0937201	-0.036449	0.0144585	0.192635			0.928	0.108638	0.0793657	0.0730023	0.102274	-2.19493
	0.929	0.0335489	0.0755476	0.111183	0.182454	0.183726			0.929	0.078093	0.0450031	0.0437304	0.0628207	0.106092			0.929	-0.144628	-0.0937201	-0.0440852	0.00809509	0.181181			0.929	0.102274	0.0806384	0.0895472	0.0895472	0.0551846
	0.93	0.0348216	0.0717296	0.126455	0.178636	0.19009			0.93	0.074275	0.0450031	0.0539119	0.0704569	0.104819			0.93	-0.149718	-0.10772	-0.0542667	0.0170039	0.186272			0.93	0.0984561	0.0755476	0.0793657	0.108638	0.108638
	0.931	0.0195493	0.074275	0.113728	0.181181	0.179908			0.931	0.074275	0.0297308	0.0564573	0.0730023	0.106092			0.931	-0.144628	-0.0975382	-0.0568121	0.0157312	0.182454			0.931	0.108638	0.0768203	0.0679115	0.108638	-0.222262
	0.932	0.0399123	0.0666388	0.117546	0.170999	0.177363			0.932	0.0730023	0.0450031	0.0475485	0.0679115	0.118819			0.932	-0.142082	-0.100084	-0.049176	0.0106405	0.191362			0.932	0.116274	0.0551846	0.0653661	0.10991	-0.172627
	0.933	0.0322762	0.0819111	0.122637	0.178636	0.184999			0.933	0.0704569	0.0488212	0.0551846	0.0717296	0.0997288			0.933	-0.12681	-0.0988109	-0.049176	0.00936778	0.186272			0.933	0.112456	0.0704569	0.0717296	0.0959107	0.0971834
	0.934	0.0348216	0.0640934	0.107365	0.173545	0.19009			0.934	0.0831838	0.0297308	0.0322762	0.0679115	0.106092			0.934	-0.144628	-0.0962655	-0.052994	0.00554971	0.211725			0.934	0.0971834	0.0755476	0.0691842	0.101001	0.187544
	0.935	0.0360943	0.0666388	0.120092	0.160818	0.201544			0.935	0.074275	0.037367	0.041185	0.0691842	0.113728			0.935	-0.1459	-0.105174	-0.0428125	0.0131859	0.200271			0.935	0.102274	0.0717296	0.0717296	0.0882745	0.226998
	0.936	0.0233674	0.0768203	0.113728	0.172272	0.187544			0.936	0.0882745	0.0437304	0.05773	0.0653661	0.104819			0.936	-0.14081	-0.110265	-0.0542667	-0.00208643	0.20918			0.936	0.104819	0.0895472	0.0691842	0.0997288	0.247361
	0.937	0.0322762	0.0806384	0.108638	0.17609	0.207907			0.937	0.0730023	0.0450031	0.0513665	0.0640934	0.108638			0.937	-0.148446	-0.119174	-0.0479033	0.00173164	0.20918			0.937	0.104819	0.0691842	0.061548	0.103547	0.252451
	0.938	0.0437304	0.0691842	0.120092	0.177363	0.201544			0.938	0.0730023	0.0297308	0.0475485	0.0831838	0.104819			0.938	-0.133174	-0.086084	-0.0517213	0.0182766	0.226998			0.938	0.113728	0.0666388	0.074275	0.111183	0.246088
	0.939	0.037367	0.0717296	0.107365	0.187544	0.214271			0.939	0.0793657	0.0386396	0.0500939	0.0691842	0.10991			0.939	-0.134446	-0.0886293	-0.0453579	0.0233674	0.240997			0.939	0.112456	0.0730023	0.0755476	0.107365	0.234634
	0.94	0.0284581	0.0870019	0.135364	0.181181	0.215543			0.94	0.0730023	0.0271854	0.0488212	0.0640934	0.115001			0.94	-0.153536	-0.0988109	-0.0555394	0.0157312	0.216816			0.94	0.115001	0.0679115	0.0691842	0.0895472	0.220634
	0.941	0.0424577	0.0730023	0.108638	0.177363	0.22318			0.941	0.0793657	0.0450031	0.0399123	0.0730023	0.120092			0.941	-0.157355	-0.101356	-0.0428125	0.00300433	0.237179			0.941	0.111183	0.0730023	0.0768203	0.0857292	0.201544
	0.942	0.0271854	0.0831838	0.120092	0.181181	0.215543			0.942	0.0882745	0.0271854	0.037367	0.0806384	0.0971834			0.942	-0.136991	-0.086084	-0.0606302	0.020822	0.235906			0.942	0.108638	0.0640934	0.0857292	0.102274	0.198998
	0.943	0.0386396	0.0679115	0.127728	0.187544	0.230816			0.943	0.0768203	0.0437304	0.0539119	0.078093	0.102274			0.943	-0.135719	-0.100084	-0.0466306	0.00554971	0.229543			0.943	0.111183	0.0717296	0.074275	0.104819	0.202817
	0.944	0.0348216	0.0691842	0.127728	0.170999	0.22827			0.944	0.0857292	0.0424577	0.0602754	0.0628207	0.115001			0.944	-0.138264	-0.0937201	-0.0313583	0.0131859	0.247361			0.944	0.0984561	0.0717296	0.061548	0.104819	0.212998
	0.945	0.0310035	0.074275	0.120092	0.184999	0.247361			0.945	0.0666388	0.0297308	0.0488212	0.0704569	0.111183			0.945	-0.158627	-0.100084	-0.036449	0.0182766	0.262633			0.945	0.112456	0.0806384	0.078093	0.108638	0.201544
	0.946	0.041185	0.0666388	0.12391	0.186272	0.234634			0.946	0.078093	0.0513665	0.0399123	0.0602754	0.117546			0.946	-0.139537	-0.0962655	-0.0377217	0.0106405	0.260088			0.946	0.111183	0.074275	0.0640934	0.0971834	0.172272
	0.947	0.0386396	0.0691842	0.120092	0.197726	0.24227			0.947	0.0730023	0.0475485	0.037367	0.074275	0.0997288			0.947	-0.152264	-0.0988109	-0.0402671	0.0131859	0.244815			0.947	0.10991	0.0844565	0.0717296	0.104819	0.17609
	0.948	0.041185	0.0819111	0.120092	0.191362	0.237179			0.948	0.0793657	0.0348216	0.0653661	0.0768203	0.0984561			0.948	-0.134446	-0.114083	-0.0453579	0.0322762	0.237179			0.948	0.102274	0.074275	0.0653661	0.0933653	0.165909
	0.949	0.0284581	0.0831838	0.113728	0.183726	0.257542			0.949	0.0653661	0.0348216	0.0488212	0.0691842	0.10991			0.949	-0.14081	-0.0988109	-0.049176	0.0170039	0.271542			0.949	0.111183	0.074275	0.0793657	0.0882745	0.168454
	0.95	0.037367	0.0691842	0.122637	0.191362	0.253724			0.95	0.0730023	0.0360943	0.0475485	0.0640934	0.106092			0.95	-0.144628	-0.0988109	-0.049176	0.0144585	0.262633			0.95	0.0908199	0.0602754	0.0717296	0.0920926	0.165909
	0.951	0.0475485	0.0730023	0.117546	0.192635	0.244815			0.951	0.0704569	0.0284581	0.0450031	0.0730023	0.117546			0.951	-0.149718	-0.102629	-0.0389944	0.0335489	0.26136			0.951	0.10991	0.074275	0.0933653	0.103547	0.183726
	0.952	0.0386396	0.0793657	0.116274	0.192635	0.257542			0.952	0.0730023	0.0437304	0.0564573	0.0666388	0.103547			0.952	-0.139537	-0.0924474	-0.032631	0.0131859	0.262633			0.952	0.12391	0.0640934	0.0602754	0.0908199	0.172272
	0.953	0.0386396	0.0793657	0.118819	0.192635	0.249906			0.953	0.0539119	0.0437304	0.0526392	0.0793657	0.111183			0.953	-0.138264	-0.101356	-0.0453579	0.0119132	0.257542			0.953	0.101001	0.0691842	0.074275	0.0997288	0.150636
	0.954	0.0399123	0.0691842	0.10991	0.200271	0.270269			0.954	0.0730023	0.0348216	0.0539119	0.0691842	0.0997288			0.954	-0.152264	-0.0962655	-0.0440852	0.0106405	0.266451			0.954	0.112456	0.074275	0.0768203	0.0997288	0.168454
	0.955	0.0399123	0.0755476	0.125183	0.197726	0.271542			0.955	0.0640934	0.0310035	0.0475485	0.0844565	0.117546			0.955	-0.144628	-0.0809932	-0.0428125	0.0220947	0.279178			0.955	0.0857292	0.0831838	0.0806384	0.103547	0.167181
	0.956	0.041185	0.0831838	0.12391	0.20918	0.268997			0.956	0.0831838	0.0526392	0.0488212	0.0704569	0.10991			0.956	-0.153536	-0.102629	-0.0504486	0.0360943	0.280451			0.956	0.103547	0.0691842	0.0717296	0.0997288	0.149364
	0.957	0.0386396	0.0691842	0.10991	0.215543	0.274087			0.957	0.0691842	0.037367	0.0500939	0.0666388	0.0971834			0.957	-0.1459	-0.100084	-0.0428125	0.00936778	0.279178			0.957	0.104819	0.0500939	0.0640934	0.0984561	0.172272
	0.958	0.0335489	0.0793657	0.117546	0.198998	0.27536			0.958	0.0640934	0.0424577	0.0602754	0.0653661	0.118819			0.958	-0.143355	-0.101356	-0.0440852	0.0144585	0.265178			0.958	0.113728	0.074275	0.0806384	0.104819	0.163363
	0.959	0.0322762	0.0653661	0.127728	0.216816	0.289359			0.959	0.0806384	0.0386396	0.0551846	0.0768203	0.120092			0.959	-0.144628	-0.101356	-0.0542667	0.0068224	0.282996			0.959	0.113728	0.0831838	0.0768203	0.0908199	0.182454
	0.96	0.0386396	0.0819111	0.121365	0.202817	0.296996			0.96	0.0704569	0.0259127	0.0348216	0.0717296	0.101001			0.96	-0.144628	-0.0911747	-0.0517213	0.0106405	0.274087			0.96	0.113728	0.074275	0.074275	0.106092	0.169727
	0.961	0.0335489	0.0691842	0.122637	0.221907	0.290632			0.961	0.0806384	0.0450031	0.05773	0.0679115	0.113728			0.961	-0.150991	-0.0937201	-0.049176	0.0259127	0.295723			0.961	0.101001	0.0730023	0.0793657	0.0844565	0.165909
	0.962	0.0335489	0.0666388	0.120092	0.204089	0.288087			0.962	0.074275	0.037367	0.0602754	0.0691842	0.0959107			0.962	-0.136991	-0.0924474	-0.0440852	0.0246401	0.290632			0.962	0.118819	0.0666388	0.0768203	0.10991	0.182454
	0.963	0.0322762	0.0730023	0.121365	0.212998	0.302086			0.963	0.0768203	0.0310035	0.0475485	0.074275	0.115001			0.963	-0.1459	-0.0822659	-0.0440852	0.0220947	0.293178			0.963	0.0971834	0.078093	0.0819111	0.108638	0.159545
	0.964	0.0310035	0.0755476	0.132819	0.212998	0.296996			0.964	0.061548	0.0284581	0.05773	0.074275	0.111183			0.964	-0.14081	-0.102629	-0.0542667	0.020822	0.277905			0.964	0.118819	0.05773	0.074275	0.104819	0.169727
	0.965	0.0424577	0.0857292	0.115001	0.221907	0.299541			0.965	0.0768203	0.0284581	0.0539119	0.0730023	0.108638			0.965	-0.135719	-0.0924474	-0.0339037	0.0246401	0.282996			0.965	0.102274	0.0768203	0.0691842	0.102274	0.181181
	0.966	0.0424577	0.078093	0.121365	0.232089	0.295723			0.966	0.0730023	0.0335489	0.0437304	0.0628207	0.104819			0.966	-0.139537	-0.0835386	-0.0440852	0.0284581	0.282996			0.966	0.113728	0.0666388	0.0819111	0.094638	0.168454
	0.967	0.0386396	0.0730023	0.115001	0.221907	0.302086			0.967	0.0704569	0.0386396	0.0475485	0.0628207	0.117546			0.967	-0.136991	-0.0988109	-0.0402671	0.0220947	0.290632			0.967	0.104819	0.0717296	0.0653661	0.0920926	0.173545
	0.968	0.0322762	0.0730023	0.118819	0.215543	0.310995			0.968	0.078093	0.037367	0.0551846	0.0819111	0.104819			0.968	-0.153536	-0.100084	-0.0402671	0.0119132	0.272815			0.968	0.0984561	0.0717296	0.094638	0.112456	0.172272
	0.969	0.0450031	0.074275	0.118819	0.225725	0.317359			0.969	0.0793657	0.0386396	0.0551846	0.0717296	0.12391			0.969	-0.152264	-0.105174	-0.0313583	0.0131859	0.284269			0.969	0.10991	0.0679115	0.0730023	0.107365	0.17609
	0.97	0.041185	0.0717296	0.118819	0.22827	0.321177			0.97	0.0666388	0.0500939	0.0475485	0.078093	0.107365			0.97	-0.147173	-0.0911747	-0.0453579	0.0259127	0.295723			0.97	0.094638	0.0831838	0.0666388	0.108638	0.173545
	0.971	0.0360943	0.0730023	0.118819	0.239725	0.318631			0.971	0.0691842	0.0500939	0.0462758	0.05773	0.117546			0.971	-0.149718	-0.089902	-0.0428125	0.020822	0.300814			0.971	0.111183	0.0793657	0.074275	0.10991	0.186272
	0.972	0.0437304	0.0755476	0.117546	0.219362	0.330086			0.972	0.074275	0.0335489	0.061548	0.0857292	0.113728			0.972	-0.143355	-0.11281	-0.0428125	0.0233674	0.281723			0.972	0.104819	0.0704569	0.0819111	0.108638	0.165909
	0.973	0.037367	0.061548	0.116274	0.237179	0.32754			0.973	0.078093	0.0233674	0.0602754	0.0768203	0.118819			0.973	-0.150991	-0.0988109	-0.0542667	0.0246401	0.290632			0.973	0.108638	0.061548	0.0679115	0.0997288	0.169727
	0.974	0.0386396	0.0730023	0.12391	0.225725	0.326267			0.974	0.0768203	0.0437304	0.0526392	0.0768203	0.115001			0.974	-0.1459	-0.0962655	-0.0339037	0.0233674	0.289359			0.974	0.0971834	0.0768203	0.061548	0.107365	0.174817
	0.975	0.0437304	0.0831838	0.12391	0.239725	0.328813			0.975	0.0730023	0.0424577	0.0462758	0.0768203	0.113728			0.975	-0.139537	-0.0949928	-0.0402671	0.0271854	0.295723			0.975	0.102274	0.0691842	0.0653661	0.0997288	0.173545
	0.976	0.0360943	0.0653661	0.127728	0.230816	0.328813			0.976	0.0653661	0.0335489	0.0513665	0.0793657	0.122637			0.976	-0.142082	-0.0911747	-0.052994	0.0144585	0.296996			0.976	0.108638	0.0730023	0.0768203	0.0971834	0.16209
	0.977	0.0246401	0.0768203	0.115001	0.224452	0.322449			0.977	0.0691842	0.0450031	0.0551846	0.0717296	0.108638			0.977	-0.161173	-0.0962655	-0.032631	0.0220947	0.279178			0.977	0.0971834	0.0806384	0.0959107	0.101001	0.179908
	0.978	0.0386396	0.0870019	0.12391	0.234634	0.333904			0.978	0.0920926	0.0348216	0.0488212	0.0691842	0.118819			0.978	-0.143355	-0.101356	-0.0300856	0.0284581	0.291905			0.978	0.10991	0.0691842	0.061548	0.0920926	0.170999
	0.979	0.0297308	0.0640934	0.130273	0.224452	0.337722			0.979	0.0793657	0.0360943	0.0450031	0.074275	0.117546			0.979	-0.1459	-0.102629	-0.0453579	0.0106405	0.295723			0.979	0.117546	0.0640934	0.0984561	0.10991	0.184999
	0.98	0.0335489	0.074275	0.120092	0.237179	0.322449			0.98	0.074275	0.0335489	0.0526392	0.0704569	0.104819			0.98	-0.1459	-0.0937201	-0.0389944	0.0144585	0.289359			0.98	0.10991	0.0793657	0.078093	0.102274	0.184999
	0.981	0.0386396	0.0704569	0.126455	0.232089	0.34154			0.981	0.0844565	0.0259127	0.0564573	0.0691842	0.10991			0.981	-0.147173	-0.0784478	-0.0453579	0.0233674	0.29445			0.981	0.0971834	0.0717296	0.0882745	0.104819	0.168454
	0.982	0.0297308	0.0653661	0.121365	0.238452	0.330086			0.982	0.0857292	0.0399123	0.0424577	0.0691842	0.120092			0.982	-0.148446	-0.0809932	-0.0517213	0.0157312	0.291905			0.982	0.0971834	0.0730023	0.0666388	0.112456	0.17609
	0.983	0.0437304	0.0806384	0.127728	0.239725	0.344085			0.983	0.0653661	0.0462758	0.0551846	0.0819111	0.0997288			0.983	-0.157355	-0.103902	-0.0428125	-0.00208643	0.290632			0.983	0.10991	0.0730023	0.0882745	0.102274	0.184999
	0.984	0.0386396	0.0653661	0.115001	0.243543	0.358085			0.984	0.0717296	0.0424577	0.0590027	0.0831838	0.121365			0.984	-0.1459	-0.0988109	-0.0339037	0.00809509	0.282996			0.984	0.0984561	0.0819111	0.061548	0.103547	0.170999
	0.985	0.0335489	0.0844565	0.117546	0.243543	0.332631			0.985	0.078093	0.0322762	0.0539119	0.0704569	0.121365			0.985	-0.1459	-0.0937201	-0.0275402	0.00936778	0.293178			0.985	0.113728	0.074275	0.074275	0.0984561	0.178636
	0.986	0.0386396	0.0730023	0.122637	0.25627	0.354267			0.986	0.0793657	0.0399123	0.0475485	0.0882745	0.108638			0.986	-0.147173	-0.0975382	-0.0466306	-0.000813741	0.288087			0.986	0.113728	0.0691842	0.0730023	0.0908199	0.172272
	0.987	0.0526392	0.074275	0.120092	0.239725	0.344085			0.987	0.074275	0.0310035	0.05773	0.0666388	0.127728			0.987	-0.150991	-0.0924474	-0.0440852	0.00809509	0.288087			0.987	0.0959107	0.0704569	0.074275	0.10991	0.184999
	0.988	0.0233674	0.0691842	0.120092	0.239725	0.350449			0.988	0.074275	0.037367	0.0590027	0.078093	0.108638			0.988	-0.14081	-0.086084	-0.0453579	0.0310035	0.300814			0.988	0.108638	0.0628207	0.0717296	0.0984561	0.193908
	0.989	0.0360943	0.0691842	0.122637	0.253724	0.352994			0.989	0.0717296	0.0335489	0.0564573	0.0793657	0.104819			0.989	-0.156082	-0.114083	-0.0389944	0.0131859	0.291905			0.989	0.0895472	0.0895472	0.0870019	0.0895472	0.191362
	0.99	0.0526392	0.0755476	0.108638	0.24227	0.358085			0.99	0.0831838	0.0475485	0.0551846	0.0819111	0.118819			0.99	-0.150991	-0.0822659	-0.0453579	0.0131859	0.299541			0.99	0.113728	0.0602754	0.0717296	0.0971834	0.17609
	0.991	0.0335489	0.0717296	0.120092	0.251179	0.355539			0.991	0.0666388	0.041185	0.0500939	0.0844565	0.120092			0.991	-0.14081	-0.089902	-0.036449	0.00300433	0.302086			0.991	0.106092	0.0691842	0.074275	0.10991	0.174817
	0.992	0.041185	0.0806384	0.127728	0.24227	0.352994			0.992	0.0704569	0.0437304	0.0628207	0.0666388	0.12391			0.992	-0.149718	-0.0835386	-0.036449	0.0259127	0.271542			0.992	0.0920926	0.0653661	0.0920926	0.0971834	0.173545
	0.993	0.0360943	0.0666388	0.115001	0.248633	0.350449			0.993	0.0640934	0.037367	0.0590027	0.0755476	0.117546			0.993	-0.163718	-0.0886293	-0.0517213	-0.000813741	0.290632			0.993	0.108638	0.0691842	0.074275	0.115001	0.19009
	0.994	0.0310035	0.078093	0.131546	0.247361	0.356812			0.994	0.0793657	0.0322762	0.0462758	0.0806384	0.0997288			0.994	-0.161173	-0.0911747	-0.032631	0.0157312	0.293178			0.994	0.10991	0.074275	0.0640934	0.0933653	0.172272
	0.995	0.0271854	0.0768203	0.12391	0.247361	0.352994			0.995	0.0704569	0.0259127	0.0386396	0.0793657	0.116274			0.995	-0.144628	-0.108992	-0.049176	-0.0059045	0.282996			0.995	0.107365	0.0704569	0.0768203	0.102274	0.163363
	0.996	0.0360943	0.0704569	0.120092	0.239725	0.359357			0.996	0.0691842	0.041185	0.0564573	0.0793657	0.115001			0.996	-0.1459	-0.0886293	-0.0377217	0.000458949	0.290632			0.996	0.0971834	0.074275	0.074275	0.104819	0.159545
	0.997	0.0310035	0.0679115	0.127728	0.234634	0.366994			0.997	0.0768203	0.041185	0.0564573	0.078093	0.126455			0.997	-0.148446	-0.0848113	-0.049176	0.0068224	0.288087			0.997	0.120092	0.0793657	0.0806384	0.0997288	0.170999
	0.998	0.0424577	0.0768203	0.120092	0.257542	0.352994			0.998	0.0755476	0.0450031	0.0640934	0.0831838	0.120092			0.998	-0.156082	-0.0924474	-0.032631	-0.000813741	0.280451			0.998	0.107365	0.0730023	0.0768203	0.103547	0.170999
	0.999	0.0386396	0.0730023	0.125183	0.248633	0.365721			0.999	0.0691842	0.0424577	0.0462758	0.0793657	0.107365			0.999	-0.158627	-0.0949928	-0.0415398	0.000458949	0.266451			0.999	0.094638	0.0806384	0.0704569	0.0933653	0.173545
	1	0.0424577	0.078093	0.125183	0.252451	0.354267			1	0.0870019	0.0424577	0.0488212	0.0857292	0.117546			1	-0.135719	-0.115356	-0.052994	-0.00972257	0.281723			1	0.108638	0.074275	0.0793657	0.0933653	0.184999
	1.001	0.0386396	0.0730023	0.117546	0.251179	0.352994			1.001	0.0730023	0.0322762	0.0526392	0.074275	0.116274			1.001	-0.142082	-0.0949928	-0.0593575	-0.00335912	0.26136			1.001	0.0984561	0.0640934	0.0895472	0.120092	0.172272
	1.002	0.0475485	0.0653661	0.127728	0.249906	0.354267			1.002	0.078093	0.0399123	0.0717296	0.0730023	0.10991			1.002	-0.147173	-0.0988109	-0.0415398	-0.00208643	0.265178			1.002	0.094638	0.0590027	0.0679115	0.10991	0.174817
	1.003	0.0335489	0.0870019	0.10991	0.247361	0.350449			1.003	0.0857292	0.0399123	0.0488212	0.0819111	0.118819			1.003	-0.152264	-0.086084	-0.0440852	-0.0135406	0.253724			1.003	0.10991	0.0653661	0.0895472	0.0997288	0.181181
	1.004	0.0271854	0.0768203	0.112456	0.247361	0.352994			1.004	0.0730023	0.037367	0.0564573	0.078093	0.117546			1.004	-0.150991	-0.089902	-0.0517213	-0.00463181	0.253724			1.004	0.102274	0.061548	0.0870019	0.101001	0.168454
	1.005	0.0462758	0.0679115	0.118819	0.243543	0.333904			1.005	0.0691842	0.0310035	0.0488212	0.0793657	0.120092			1.005	-0.152264	-0.105174	-0.049176	-0.00335912	0.240997			1.005	0.101001	0.0666388	0.0666388	0.0933653	0.172272
	1.006	0.0437304	0.0679115	0.117546	0.247361	0.332631			1.006	0.0870019	0.0335489	0.0564573	0.0793657	0.112456			1.006	-0.147173	-0.102629	-0.0580848	-0.00844988	0.219362			1.006	0.111183	0.0717296	0.0768203	0.102274	0.170999
	1.007	0.0360943	0.0755476	0.116274	0.244815	0.328813			1.007	0.0691842	0.0500939	0.0399123	0.074275	0.115001			1.007	-0.158627	-0.102629	-0.0568121	-0.0313583	0.205362			1.007	0.117546	0.0717296	0.078093	0.103547	0.172272
	1.008	0.037367	0.074275	0.118819	0.237179	0.322449			1.008	0.0691842	0.0526392	0.0450031	0.0806384	0.127728			1.008	-0.152264	-0.105174	-0.0479033	-0.0313583	0.193908			1.008	0.0984561	0.0717296	0.0704569	0.10991	0.155727
	1.009	0.041185	0.0666388	0.130273	0.232089	0.305905			1.009	0.0730023	0.0271854	0.0564573	0.0730023	0.118819			1.009	-0.14081	-0.121719	-0.0504486	-0.0288129	0.153182			1.009	0.115001	0.078093	0.078093	0.0997288	0.181181
	1.01	0.0348216	0.0704569	0.116274	0.247361	0.303359			1.01	0.0793657	0.041185	0.0526392	0.0768203	0.120092			1.01	-0.148446	-0.119174	-0.0657209	-0.0428125	0.159545			1.01	0.108638	0.0653661	0.0640934	0.106092	0.159545
	1.011	0.0284581	0.0704569	0.113728	0.229543	0.290632			1.011	0.0640934	0.0386396	0.0462758	0.0819111	0.121365			1.011	-0.142082	-0.111538	-0.0644482	-0.0199041	0.137909			1.011	0.104819	0.0730023	0.0717296	0.104819	0.165909
	1.012	0.0386396	0.078093	0.117546	0.230816	0.280451			1.012	0.061548	0.0284581	0.0564573	0.0679115	0.118819			1.012	-0.154809	-0.105174	-0.0708117	-0.0377217	0.103547			1.012	0.104819	0.0882745	0.0844565	0.0844565	0.165909
	1.013	0.0335489	0.061548	0.117546	0.233361	0.262633			1.013	0.0704569	0.0475485	0.0500939	0.0755476	0.116274			1.013	-0.136991	-0.106447	-0.049176	-0.0237222	0.0857292			1.013	0.0857292	0.0895472	0.0870019	0.102274	0.165909
	1.014	0.0259127	0.0717296	0.107365	0.206635	0.270269			1.014	0.0691842	0.0322762	0.0450031	0.074275	0.111183			1.014	-0.152264	-0.0924474	-0.0593575	-0.0504486	0.0628207			1.014	0.104819	0.0602754	0.0831838	0.0997288	0.167181
	1.015	0.0386396	0.078093	0.122637	0.207907	0.25627			1.015	0.0717296	0.0437304	0.0590027	0.078093	0.127728			1.015	-0.154809	-0.101356	-0.0568121	-0.0199041	0.0386396			1.015	0.111183	0.0462758	0.0819111	0.104819	0.159545
	1.016	0.0424577	0.074275	0.120092	0.215543	0.247361			1.016	0.0730023	0.0399123	0.0462758	0.0717296	0.121365			1.016	-0.150991	-0.108992	-0.0644482	-0.0173587	0.00427702			1.016	0.0997288	0.0768203	0.0793657	0.0920926	0.160818
	1.017	0.0386396	0.0666388	0.108638	0.216816	0.232089			1.017	0.0691842	0.0348216	0.0666388	0.0730023	0.108638			1.017	-0.131901	-0.111538	-0.0644482	-0.032631	-0.0237222			1.017	0.10991	0.074275	0.0844565	0.102274	0.163363
	1.018	0.0360943	0.0691842	0.113728	0.221907	0.214271			1.018	0.078093	0.0386396	0.0590027	0.078093	0.116274			1.018	-0.148446	-0.110265	-0.0644482	-0.0249948	-0.069539			1.018	0.0984561	0.0768203	0.0755476	0.094638	0.169727
	1.019	0.0399123	0.0755476	0.106092	0.200271	0.201544			1.019	0.061548	0.0360943	0.0462758	0.0857292	0.112456			1.019	-0.149718	-0.0924474	-0.089902	-0.0377217	-0.105174			1.019	0.108638	0.0806384	0.0768203	0.0831838	0.174817
	1.02	0.0386396	0.0640934	0.10991	0.196453	0.198998			1.02	0.0640934	0.0424577	0.041185	0.0717296	0.111183			1.02	-0.150991	-0.0797205	-0.0682663	-0.0428125	-0.130628			1.02	0.120092	0.0628207	0.0755476	0.10991	0.143
	1.021	0.0335489	0.0730023	0.0959107	0.198998	0.193908			1.021	0.0717296	0.0348216	0.05773	0.0806384	0.118819			1.021	-0.133174	-0.102629	-0.0720844	-0.0504486	-0.180263			1.021	0.117546	0.0590027	0.078093	0.0984561	0.173545
	1.022	0.0348216	0.0640934	0.116274	0.197726	0.174817			1.022	0.0844565	0.0462758	0.0539119	0.0844565	0.106092			1.022	-0.143355	-0.114083	-0.0809932	-0.0339037	-0.22608			1.022	0.0882745	0.0717296	0.0831838	0.107365	0.158273
	1.023	0.0437304	0.0704569	0.102274	0.184999	0.155727			1.023	0.074275	0.0310035	0.0526392	0.0831838	0.116274			1.023	-0.152264	-0.101356	-0.0720844	-0.0275402	-0.257897			1.023	0.104819	0.0831838	0.0602754	0.104819	0.144273
	1.024	0.0450031	0.0691842	0.10991	0.182454	0.153182			1.024	0.0844565	0.0322762	0.0475485	0.0831838	0.101001			1.024	-0.1459	-0.114083	-0.0619029	-0.032631	-0.307532			1.024	0.107365	0.0640934	0.0717296	0.0984561	0.150636
	1.025	0.0437304	0.0691842	0.104819	0.184999	0.145546			1.025	0.0730023	0.0450031	0.0640934	0.0717296	0.116274			1.025	-0.136991	-0.103902	-0.0835386	-0.0517213	-0.343167			1.025	0.102274	0.0793657	0.0730023	0.0933653	0.168454
	1.026	0.0322762	0.0730023	0.102274	0.177363	0.137909			1.026	0.0806384	0.0335489	0.05773	0.0831838	0.117546			1.026	-0.150991	-0.102629	-0.0809932	-0.0415398	-0.368621			1.026	0.104819	0.0895472	0.0908199	0.101001	0.160818
	1.027	0.0399123	0.0730023	0.0997288	0.170999	0.122637			1.027	0.0806384	0.0322762	0.0488212	0.0768203	0.112456			1.027	-0.14081	-0.103902	-0.0771751	-0.032631	-0.414438			1.027	0.107365	0.074275	0.0768203	0.0933653	0.16209
	1.028	0.0271854	0.0679115	0.108638	0.160818	0.117546			1.028	0.0793657	0.0310035	0.0526392	0.078093	0.120092			1.028	-0.125537	-0.111538	-0.0682663	-0.0593575	-0.444982			1.028	0.0895472	0.0717296	0.0870019	0.106092	0.169727
	1.029	0.0310035	0.0628207	0.10991	0.16209	0.106092			1.029	0.0844565	0.0500939	0.0539119	0.078093	0.117546			1.029	-0.129355	-0.108992	-0.0759024	-0.0300856	-0.452619			1.029	0.0984561	0.0806384	0.0730023	0.0933653	0.160818
	1.03	0.0335489	0.074275	0.102274	0.134091	0.106092			1.03	0.0755476	0.0335489	0.0500939	0.078093	0.118819			1.03	-0.143355	-0.100084	-0.0759024	-0.0237222	-0.4768			1.03	0.107365	0.0679115	0.0768203	0.0908199	0.151909
	1.031	0.0322762	0.0691842	0.108638	0.157	0.0920926			1.031	0.078093	0.0500939	0.0475485	0.0730023	0.10991			1.031	-0.149718	-0.0975382	-0.069539	-0.0389944	-0.493345			1.031	0.0997288	0.0768203	0.0882745	0.102274	0.148091
	1.032	0.037367	0.0730023	0.102274	0.125183	0.0971834			1.032	0.0755476	0.0233674	0.05773	0.0857292	0.106092			1.032	-0.129355	-0.0962655	-0.0708117	-0.0300856	-0.506072			1.032	0.115001	0.0564573	0.05773	0.107365	0.154454
	1.033	0.0386396	0.061548	0.112456	0.120092	0.0730023			1.033	0.0793657	0.0271854	0.0488212	0.074275	0.108638			1.033	-0.12681	-0.0988109	-0.0746297	-0.0402671	-0.502254			1.033	0.0971834	0.0590027	0.0806384	0.0971834	0.139182
	1.034	0.0386396	0.05773	0.0997288	0.120092	0.0793657			1.034	0.0755476	0.0399123	0.0551846	0.078093	0.117546			1.034	-0.121719	-0.110265	-0.0619029	-0.0224495	-0.506072			1.034	0.10991	0.0717296	0.074275	0.0819111	0.157
	1.035	0.0386396	0.0755476	0.103547	0.102274	0.0730023			1.035	0.0653661	0.0437304	0.041185	0.0666388	0.116274			1.035	-0.135719	-0.0975382	-0.0797205	-0.0339037	-0.48189			1.035	0.0971834	0.0666388	0.0704569	0.0844565	0.157
	1.036	0.0322762	0.0844565	0.0895472	0.108638	0.0679115			1.036	0.061548	0.0437304	0.041185	0.0768203	0.104819			1.036	-0.139537	-0.0975382	-0.0657209	-0.0173587	-0.480618			1.036	0.0984561	0.0806384	0.0717296	0.0971834	0.151909
	1.037	0.0310035	0.0768203	0.104819	0.0971834	0.0730023			1.037	0.0602754	0.0488212	0.0500939	0.0908199	0.0997288			1.037	-0.125537	-0.0937201	-0.049176	-0.0199041	-0.471709			1.037	0.111183	0.061548	0.0844565	0.0933653	0.146818
	1.038	0.0360943	0.0640934	0.102274	0.094638	0.05773			1.038	0.074275	0.0297308	0.0551846	0.078093	0.117546			1.038	-0.144628	-0.106447	-0.0568121	-0.0237222	-0.446255			1.038	0.108638	0.0640934	0.0768203	0.0984561	0.144273
	1.039	0.0348216	0.0691842	0.094638	0.0920926	0.0653661			1.039	0.061548	0.0310035	0.0488212	0.0640934	0.103547			1.039	-0.142082	-0.103902	-0.0631755	-0.0275402	-0.430983			1.039	0.106092	0.0882745	0.0831838	0.0997288	0.151909
	1.04	0.0386396	0.0755476	0.107365	0.0870019	0.0730023			1.04	0.0590027	0.0475485	0.0526392	0.0640934	0.117546			1.04	-0.135719	-0.110265	-0.0517213	-0.0313583	-0.416983			1.04	0.0971834	0.05773	0.0730023	0.0920926	0.157
	1.041	0.0488212	0.074275	0.0997288	0.0831838	0.0640934			1.041	0.0819111	0.0424577	0.0526392	0.0831838	0.111183			1.041	-0.125537	-0.11281	-0.0631755	-0.0224495	-0.378803			1.041	0.113728	0.0717296	0.0691842	0.102274	0.130273
	1.042	0.037367	0.0730023	0.104819	0.0768203	0.074275			1.042	0.0730023	0.0360943	0.0513665	0.0704569	0.0971834			1.042	-0.130628	-0.0949928	-0.069539	-0.016086	-0.346985			1.042	0.0984561	0.078093	0.078093	0.0933653	0.151909
	1.043	0.041185	0.0806384	0.103547	0.0691842	0.0691842			1.043	0.061548	0.0462758	0.0437304	0.0806384	0.116274			1.043	-0.144628	-0.0937201	-0.0593575	-0.016086	-0.336804			1.043	0.0997288	0.0653661	0.0691842	0.0882745	0.149364
	1.044	0.0386396	0.0768203	0.107365	0.0691842	0.0793657			1.044	0.0844565	0.0386396	0.0475485	0.0730023	0.121365			1.044	-0.128083	-0.11281	-0.0504486	-0.0262675	-0.312623			1.044	0.107365	0.0691842	0.0768203	0.0882745	0.145546
	1.045	0.0424577	0.0653661	0.106092	0.0590027	0.0755476			1.045	0.0691842	0.0475485	0.05773	0.0590027	0.10991			1.045	-0.124265	-0.110265	-0.0479033	-0.00335912	-0.290987			1.045	0.10991	0.0602754	0.0640934	0.107365	0.136637
	1.046	0.0437304	0.0653661	0.106092	0.0793657	0.0679115			1.046	0.0717296	0.0360943	0.0475485	0.074275	0.0920926			1.046	-0.134446	-0.0886293	-0.0555394	-0.00717719	-0.27826			1.046	0.0806384	0.0755476	0.0857292	0.0971834	0.148091
	1.047	0.0386396	0.0730023	0.111183	0.074275	0.0895472			1.047	0.0640934	0.0348216	0.0653661	0.0768203	0.120092			1.047	-0.142082	-0.0949928	-0.0619029	-0.016086	-0.242625			1.047	0.10991	0.078093	0.0806384	0.0997288	0.151909
	1.048	0.0386396	0.0730023	0.104819	0.0844565	0.0920926			1.048	0.0793657	0.0271854	0.0488212	0.0844565	0.108638			1.048	-0.134446	-0.110265	-0.0593575	-0.0122679	-0.22608			1.048	0.104819	0.0717296	0.061548	0.0895472	0.144273
	1.049	0.0335489	0.0831838	0.106092	0.0768203	0.0920926			1.049	0.0691842	0.0475485	0.0475485	0.0704569	0.112456			1.049	-0.116628	-0.108992	-0.049176	-0.0173587	-0.217171			1.049	0.103547	0.0500939	0.0653661	0.101001	0.151909
	1.05	0.0360943	0.0755476	0.113728	0.0793657	0.0882745			1.05	0.0640934	0.0424577	0.0437304	0.078093	0.115001			1.05	-0.136991	-0.106447	-0.0440852	-0.00463181	-0.191717			1.05	0.0997288	0.0793657	0.0819111	0.0920926	0.141728
	1.051	0.0488212	0.0819111	0.10991	0.0857292	0.112456			1.051	0.0539119	0.0310035	0.0539119	0.0628207	0.0984561			1.051	-0.139537	-0.0975382	-0.052994	0.00936778	-0.158627			1.051	0.0959107	0.0691842	0.0819111	0.0971834	0.154454
	1.052	0.0360943	0.0691842	0.101001	0.0844565	0.101001			1.052	0.0602754	0.0386396	0.0513665	0.078093	0.115001			1.052	-0.134446	-0.0911747	-0.0580848	-0.0148133	-0.170081			1.052	0.103547	0.0691842	0.0793657	0.0933653	0.153182
	1.053	0.041185	0.0691842	0.103547	0.0908199	0.104819			1.053	0.0602754	0.041185	0.0488212	0.0730023	0.112456			1.053	-0.136991	-0.0962655	-0.052994	-0.0135406	-0.136991			1.053	0.101001	0.0793657	0.078093	0.0971834	0.157
	1.054	0.041185	0.0730023	0.10991	0.0908199	0.116274			1.054	0.0488212	0.0424577	0.0500939	0.078093	0.122637			1.054	-0.135719	-0.105174	-0.0466306	-0.00463181	-0.111538			1.054	0.101001	0.0679115	0.0666388	0.0895472	0.210453
	1.055	0.0335489	0.0717296	0.102274	0.0971834	0.121365			1.055	0.0679115	0.0437304	0.0539119	0.0679115	0.101001			1.055	-0.14081	-0.089902	-0.0428125	-0.00208643	-0.11281			1.055	0.112456	0.0704569	0.078093	0.0819111	0.178636
	1.056	0.0335489	0.078093	0.10991	0.094638	0.130273			1.056	0.0730023	0.037367	0.037367	0.0768203	0.113728			1.056	-0.135719	-0.101356	-0.0555394	-0.0173587	-0.11281			1.056	0.0831838	0.0666388	0.0908199	0.0920926	0.168454
	1.057	0.041185	0.0640934	0.094638	0.10991	0.125183			1.057	0.0691842	0.0297308	0.0564573	0.0895472	0.0959107			1.057	-0.134446	-0.0682663	-0.0517213	-0.00972257	-0.0797205			1.057	0.111183	0.0691842	0.0730023	0.0997288	0.151909
	1.058	0.037367	0.0666388	0.102274	0.0971834	0.120092			1.058	0.0691842	0.0500939	0.0500939	0.0691842	0.112456			1.058	-0.124265	-0.0962655	-0.0428125	-0.0109953	-0.0644482			1.058	0.103547	0.0602754	0.0679115	0.0984561	0.146818
	1.059	0.0284581	0.0768203	0.107365	0.112456	0.129001			1.059	0.0602754	0.0462758	0.0526392	0.0730023	0.112456			1.059	-0.131901	-0.106447	-0.032631	-0.0059045	-0.0822659			1.059	0.104819	0.0628207	0.0691842	0.094638	0.157
	1.06	0.0475485	0.0768203	0.104819	0.103547	0.145546			1.06	0.0717296	0.0284581	0.0539119	0.0653661	0.10991			1.06	-0.135719	-0.0949928	-0.0517213	-0.00208643	-0.0453579			1.06	0.107365	0.0755476	0.0704569	0.094638	0.139182
	1.061	0.0348216	0.0755476	0.116274	0.117546	0.140455			1.061	0.05773	0.041185	0.0500939	0.074275	0.117546			1.061	-0.131901	-0.0962655	-0.0555394	0.00554971	-0.0300856			1.061	0.094638	0.078093	0.0768203	0.0984561	0.158273
	1.062	0.0271854	0.0755476	0.0908199	0.108638	0.145546			1.062	0.0590027	0.0297308	0.0539119	0.0768203	0.103547			1.062	-0.130628	-0.100084	-0.0504486	-0.0109953	-0.0351764			1.062	0.101001	0.0691842	0.0640934	0.0908199	0.140455
	1.063	0.0500939	0.0819111	0.10991	0.108638	0.154454			1.063	0.061548	0.0386396	0.0526392	0.0590027	0.118819			1.063	-0.134446	-0.086084	-0.0479033	-0.0224495	-0.016086			1.063	0.104819	0.0831838	0.0730023	0.0997288	0.157
	1.064	0.0310035	0.0691842	0.120092	0.130273	0.141728			1.064	0.0590027	0.0399123	0.0564573	0.0793657	0.112456			1.064	-0.142082	-0.102629	-0.0415398	0.00427702	-0.00717719			1.064	0.0984561	0.078093	0.0666388	0.0971834	0.151909
	1.065	0.037367	0.0691842	0.104819	0.131546	0.160818			1.065	0.0628207	0.041185	0.0526392	0.0793657	0.10991			1.065	-0.129355	-0.0924474	-0.0568121	-0.000813741	-0.00717719			1.065	0.094638	0.074275	0.078093	0.0997288	0.167181
	1.066	0.037367	0.0717296	0.103547	0.120092	0.173545			1.066	0.0424577	0.0437304	0.0526392	0.0768203	0.107365			1.066	-0.147173	-0.0809932	-0.0351764	0.000458949	-0.00844988			1.066	0.0870019	0.0730023	0.0793657	0.0984561	0.159545
	1.067	0.0437304	0.078093	0.10991	0.130273	0.170999			1.067	0.0360943	0.041185	0.0526392	0.0691842	0.0984561			1.067	-0.130628	-0.105174	-0.0504486	0.00809509	0.0170039			1.067	0.106092	0.0691842	0.0768203	0.094638	0.145546
	1.068	0.0399123	0.0717296	0.0895472	0.131546	0.177363			1.068	0.020822	0.0335489	0.0564573	0.074275	0.122637			1.068	-0.130628	-0.0924474	-0.052994	-0.0109953	0.0182766			1.068	0.104819	0.0513665	0.0870019	0.0895472	0.146818
	1.069	0.0360943	0.0768203	0.0984561	0.135364	0.177363			1.069	0.0157312	0.041185	0.0526392	0.0717296	0.106092			1.069	-0.131901	-0.0962655	-0.0415398	-0.00335912	0.0284581			1.069	0.0959107	0.0628207	0.078093	0.102274	0.155727
	1.07	0.0335489	0.0691842	0.107365	0.136637	0.170999			1.07	-0.0249948	0.0462758	0.0551846	0.0691842	0.116274			1.07	-0.139537	-0.0911747	-0.052994	-0.00208643	0.0182766			1.07	0.0984561	0.0806384	0.0755476	0.0870019	0.134091
	1.071	0.0386396	0.0679115	0.0971834	0.146818	0.184999			1.071	-0.032631	0.0297308	0.0539119	0.074275	0.116274			1.071	-0.120447	-0.0988109	-0.0555394	0.0182766	0.0386396			1.071	0.103547	0.0602754	0.0679115	0.107365	0.169727
	1.072	0.0399123	0.0793657	0.115001	0.139182	0.191362			1.072	-0.0631755	0.0271854	0.0590027	0.0844565	0.106092			1.072	-0.131901	-0.0988109	-0.0351764	0.00936778	0.0437304			1.072	0.108638	0.0768203	0.0691842	0.0997288	0.141728
	1.073	0.0360943	0.074275	0.0984561	0.151909	0.192635			1.073	-0.0848113	0.0450031	0.0564573	0.0831838	0.112456			1.073	-0.122992	-0.0937201	-0.052994	0.00173164	0.0526392			1.073	0.107365	0.0666388	0.0640934	0.0844565	0.144273
	1.074	0.0322762	0.0844565	0.108638	0.151909	0.204089			1.074	-0.103902	0.0297308	0.0462758	0.0717296	0.115001			1.074	-0.135719	-0.0848113	-0.0504486	0.00809509	0.0831838			1.074	0.102274	0.0704569	0.0730023	0.0933653	0.160818
	1.075	0.0310035	0.061548	0.104819	0.150636	0.193908			1.075	-0.117901	0.0513665	0.0564573	0.0768203	0.112456			1.075	-0.129355	-0.102629	-0.0415398	0.0119132	0.0602754			1.075	0.104819	0.074275	0.078093	0.0857292	0.158273
	1.076	0.0488212	0.0640934	0.107365	0.154454	0.205362			1.076	-0.124265	0.0348216	0.041185	0.0691842	0.118819			1.076	-0.116628	-0.0962655	-0.0504486	0.00173164	0.0590027			1.076	0.0895472	0.0755476	0.0857292	0.102274	0.155727
	1.077	0.0195493	0.0666388	0.0984561	0.154454	0.196453			1.077	-0.116628	0.0551846	0.0628207	0.0679115	0.118819			1.077	-0.139537	-0.0797205	-0.0428125	-0.00208643	0.0653661			1.077	0.0895472	0.078093	0.0730023	0.094638	0.163363
	1.078	0.0310035	0.0640934	0.127728	0.154454	0.215543			1.078	-0.124265	0.0348216	0.0475485	0.0793657	0.108638			1.078	-0.14081	-0.0962655	-0.0415398	0.0157312	0.0793657			1.078	0.107365	0.0844565	0.0704569	0.0882745	0.153182
	1.079	0.0386396	0.0730023	0.107365	0.159545	0.205362			1.079	-0.114083	0.0424577	0.0488212	0.0920926	0.120092			1.079	-0.125537	-0.0835386	-0.0542667	0.020822	0.0819111			1.079	0.094638	0.0653661	0.0768203	0.0870019	0.16209
	1.08	0.0386396	0.0730023	0.108638	0.158273	0.202817			1.08	-0.12681	0.0335489	0.0628207	0.0691842	0.107365			1.08	-0.12681	-0.0886293	-0.0555394	0.00173164	0.0971834			1.08	0.108638	0.0730023	0.0806384	0.0933653	0.160818
	1.081	0.0322762	0.0691842	0.108638	0.160818	0.196453			1.081	-0.148446	0.0399123	0.0653661	0.0870019	0.10991			1.081	-0.114083	-0.0911747	-0.0377217	-0.0211768	0.0997288			1.081	0.0984561	0.078093	0.0793657	0.0997288	0.136637
	1.082	0.0360943	0.0691842	0.111183	0.155727	0.22318			1.082	-0.157355	0.037367	0.0590027	0.0717296	0.10991			1.082	-0.139537	-0.0975382	-0.0555394	0.00173164	0.0857292			1.082	0.0895472	0.0768203	0.074275	0.104819	0.148091
	1.083	0.0437304	0.0730023	0.104819	0.168454	0.212998			1.083	-0.1599	0.0322762	0.0310035	0.094638	0.106092			1.083	-0.144628	-0.0784478	-0.0542667	0.00173164	0.094638			1.083	0.103547	0.0628207	0.0844565	0.0908199	0.165909
	1.084	0.0322762	0.074275	0.104819	0.17609	0.22318			1.084	-0.1739	0.0437304	0.0539119	0.0755476	0.127728			1.084	-0.138264	-0.0848113	-0.052994	0.00427702	0.120092			1.084	0.0933653	0.074275	0.0653661	0.0806384	0.164636
	1.085	0.0475485	0.078093	0.101001	0.168454	0.216816			1.085	-0.186626	0.0335489	0.0590027	0.078093	0.117546			1.085	-0.12681	-0.0988109	-0.0542667	-0.000813741	0.104819			1.085	0.104819	0.0691842	0.0602754	0.0908199	0.144273
	1.086	0.0386396	0.0691842	0.102274	0.172272	0.216816			1.086	-0.186626	0.0500939	0.0488212	0.0717296	0.111183			1.086	-0.12681	-0.0949928	-0.0428125	-0.0148133	0.108638			1.086	0.101001	0.0819111	0.0730023	0.0857292	0.160818
	1.087	0.0386396	0.0704569	0.107365	0.165909	0.22318			1.087	-0.206989	0.0475485	0.0513665	0.0844565	0.10991			1.087	-0.12681	-0.0924474	-0.0440852	-0.0109953	0.111183			1.087	0.0971834	0.0730023	0.0640934	0.094638	0.151909
	1.088	0.0450031	0.0717296	0.113728	0.165909	0.221907			1.088	-0.218444	0.0297308	0.0513665	0.0755476	0.118819			1.088	-0.129355	-0.0809932	-0.049176	-0.00208643	0.12391			1.088	0.102274	0.0691842	0.0730023	0.101001	0.154454
	1.089	0.0437304	0.0806384	0.0920926	0.179908	0.225725			1.089	-0.224807	0.041185	0.0602754	0.0793657	0.108638			1.089	-0.130628	-0.101356	-0.052994	0.0131859	0.115001			1.089	0.0959107	0.0793657	0.0730023	0.0984561	0.158273
	1.09	0.037367	0.0666388	0.107365	0.164636	0.243543			1.09	-0.228625	0.0399123	0.0450031	0.078093	0.122637			1.09	-0.135719	-0.0962655	-0.0440852	-0.0135406	0.130273			1.09	0.106092	0.0717296	0.0768203	0.103547	0.149364
	1.091	0.0360943	0.0679115	0.132819	0.169727	0.240997			1.091	-0.220989	0.0500939	0.05773	0.0730023	0.118819			1.091	-0.133174	-0.101356	-0.0580848	0.0119132	0.134091			1.091	0.104819	0.061548	0.0717296	0.0971834	0.154454
	1.092	0.0310035	0.0590027	0.0920926	0.174817	0.229543			1.092	-0.237534	0.0437304	0.0526392	0.0768203	0.106092			1.092	-0.1459	-0.086084	-0.0453579	-0.0135406	0.130273			1.092	0.094638	0.0666388	0.0857292	0.0997288	0.149364
	1.093	0.0450031	0.0691842	0.103547	0.184999	0.22318			1.093	-0.214626	0.0360943	0.0590027	0.0717296	0.10991			1.093	-0.135719	-0.0975382	-0.0415398	-0.00335912	0.135364			1.093	0.120092	0.0730023	0.0755476	0.0984561	0.159545
	1.094	0.0450031	0.0857292	0.101001	0.184999	0.24227			1.094	-0.201899	0.037367	0.0513665	0.0857292	0.104819			1.094	-0.135719	-0.0924474	-0.0479033	0.0119132	0.139182			1.094	0.101001	0.078093	0.0806384	0.0908199	0.150636
	1.095	0.0399123	0.0666388	0.102274	0.170999	0.237179			1.095	-0.185354	0.0386396	0.0539119	0.0679115	0.116274			1.095	-0.135719	-0.0937201	-0.0466306	0.0068224	0.126455			1.095	0.0806384	0.074275	0.074275	0.0870019	0.151909
	1.096	0.0437304	0.0691842	0.101001	0.173545	0.232089			1.096	-0.172627	0.0386396	0.0488212	0.0755476	0.112456			1.096	-0.131901	-0.0848113	-0.0504486	-0.0122679	0.134091			1.096	0.0844565	0.0602754	0.061548	0.103547	0.146818
	1.097	0.0348216	0.0653661	0.0984561	0.174817	0.240997			1.097	-0.149718	0.0284581	0.061548	0.0768203	0.10991			1.097	-0.133174	-0.0949928	-0.049176	0.0131859	0.135364			1.097	0.0984561	0.0653661	0.0730023	0.0959107	0.157
	1.098	0.037367	0.0717296	0.102274	0.182454	0.239725			1.098	-0.149718	0.0437304	0.0539119	0.0768203	0.130273			1.098	-0.138264	-0.0886293	-0.0440852	-0.0059045	0.130273			1.098	0.0984561	0.0882745	0.0628207	0.113728	0.155727
	1.099	0.0526392	0.0691842	0.094638	0.183726	0.235906			1.099	-0.135719	0.0500939	0.0602754	0.074275	0.111183			1.099	-0.14081	-0.0771751	-0.0479033	-0.0186314	0.129001			1.099	0.10991	0.0806384	0.0704569	0.0997288	0.150636
	1.1	0.0386396	0.0640934	0.101001	0.174817	0.229543			1.1	-0.12681	0.0386396	0.0539119	0.0793657	0.107365			1.1	-0.1459	-0.0873566	-0.0631755	-0.00972257	0.136637			1.1	0.0933653	0.0628207	0.0908199	0.0971834	0.155727
	1.101	0.0360943	0.0602754	0.101001	0.19009	0.221907			1.101	-0.102629	0.0297308	0.0513665	0.0691842	0.102274			1.101	-0.139537	-0.0949928	-0.0517213	-0.0135406	0.115001			1.101	0.0920926	0.0819111	0.0806384	0.102274	0.148091
	1.102	0.0462758	0.0730023	0.115001	0.170999	0.230816			1.102	-0.10772	0.0424577	0.0500939	0.0717296	0.113728			1.102	-0.149718	-0.110265	-0.0466306	-0.00717719	0.117546			1.102	0.113728	0.05773	0.0730023	0.0971834	0.139182
	1.103	0.0386396	0.0717296	0.106092	0.168454	0.212998			1.103	-0.103902	0.037367	0.0564573	0.074275	0.125183			1.103	-0.142082	-0.0988109	-0.052994	-0.0122679	0.118819			1.103	0.0870019	0.0666388	0.0717296	0.0933653	0.139182
	1.104	0.0450031	0.0691842	0.108638	0.179908	0.215543			1.104	-0.0886293	0.05773	0.0399123	0.0666388	0.111183			1.104	-0.131901	-0.0924474	-0.0466306	-0.0059045	0.0997288			1.104	0.0895472	0.0730023	0.0844565	0.104819	0.140455
	1.105	0.0322762	0.0691842	0.108638	0.169727	0.215543			1.105	-0.0784478	0.0386396	0.0564573	0.0730023	0.113728			1.105	-0.125537	-0.0784478	-0.0542667	-0.0148133	0.0997288			1.105	0.094638	0.0602754	0.0717296	0.0971834	0.159545
	1.106	0.041185	0.0628207	0.103547	0.167181	0.193908			1.106	-0.0682663	0.0348216	0.0437304	0.0831838	0.107365			1.106	-0.1459	-0.0911747	-0.0542667	-0.0109953	0.074275			1.106	0.101001	0.078093	0.0717296	0.0971834	0.144273
	1.107	0.037367	0.0755476	0.108638	0.165909	0.196453			1.107	-0.073357	0.0539119	0.0526392	0.074275	0.107365			1.107	-0.139537	-0.110265	-0.0542667	-0.0186314	0.0717296			1.107	0.094638	0.078093	0.0870019	0.0920926	0.155727
	1.108	0.0297308	0.0730023	0.0984561	0.164636	0.191362			1.108	-0.049176	0.0284581	0.0450031	0.0844565	0.103547			1.108	-0.143355	-0.0924474	-0.0580848	-0.0199041	0.078093			1.108	0.0971834	0.078093	0.0819111	0.094638	0.139182
	1.109	0.0462758	0.0679115	0.104819	0.169727	0.192635			1.109	-0.0402671	0.0399123	0.061548	0.0691842	0.130273			1.109	-0.144628	-0.0988109	-0.0504486	-0.0300856	0.0526392			1.109	0.103547	0.0717296	0.0730023	0.101001	0.150636
	1.11	0.0297308	0.0691842	0.0984561	0.155727	0.188817			1.11	-0.049176	0.0386396	0.0590027	0.0704569	0.10991			1.11	-0.136991	-0.0949928	-0.0517213	-0.00463181	0.0475485			1.11	0.10991	0.0564573	0.0768203	0.108638	0.144273
	1.111	0.037367	0.0704569	0.0984561	0.163363	0.183726			1.111	-0.0428125	0.0360943	0.0513665	0.0793657	0.10991			1.111	-0.129355	-0.103902	-0.0708117	-0.0199041	0.0360943			1.111	0.107365	0.0628207	0.0933653	0.0793657	0.150636
	1.112	0.037367	0.0755476	0.102274	0.154454	0.170999			1.112	-0.0453579	0.0475485	0.0526392	0.0704569	0.102274			1.112	-0.150991	-0.0949928	-0.0466306	-0.0313583	0.0233674			1.112	0.0882745	0.0831838	0.0730023	0.112456	0.140455
	1.113	0.0297308	0.0628207	0.102274	0.164636	0.174817			1.113	-0.0428125	0.0360943	0.0640934	0.0755476	0.103547			1.113	-0.154809	-0.0886293	-0.0542667	-0.0109953	0.00300433			1.113	0.102274	0.0717296	0.0717296	0.0971834	0.149364
	1.114	0.0399123	0.0831838	0.0984561	0.159545	0.158273			1.114	-0.0402671	0.0437304	0.0602754	0.0628207	0.107365			1.114	-0.125537	-0.0937201	-0.0619029	-0.0224495	-0.0211768			1.114	0.108638	0.078093	0.0704569	0.103547	0.144273
	1.115	0.037367	0.0679115	0.0971834	0.168454	0.144273			1.115	-0.0377217	0.0322762	0.0475485	0.0793657	0.10991			1.115	-0.131901	-0.089902	-0.0657209	-0.0199041	-0.0224495			1.115	0.117546	0.0730023	0.0526392	0.0984561	0.153182
	1.116	0.0335489	0.0704569	0.0997288	0.150636	0.160818			1.116	-0.0275402	0.0399123	0.0399123	0.0628207	0.113728			1.116	-0.136991	-0.0949928	-0.0568121	-0.0275402	-0.0402671			1.116	0.094638	0.074275	0.0844565	0.0984561	0.140455
	1.117	0.0297308	0.0717296	0.0895472	0.155727	0.146818			1.117	-0.0377217	0.0335489	0.0539119	0.0819111	0.120092			1.117	-0.134446	-0.101356	-0.0568121	-0.0288129	-0.073357			1.117	0.107365	0.0793657	0.0819111	0.0984561	0.130273
	1.118	0.0348216	0.0691842	0.0997288	0.153182	0.153182			1.118	-0.0402671	0.0539119	0.0399123	0.0691842	0.0997288			1.118	-0.135719	-0.0911747	-0.0351764	-0.0275402	-0.0771751			1.118	0.0895472	0.0640934	0.0666388	0.0870019	0.139182
	1.119	0.0310035	0.0691842	0.0933653	0.135364	0.134091			1.119	-0.0275402	0.0322762	0.0551846	0.0666388	0.0984561			1.119	-0.133174	-0.0924474	-0.0517213	-0.0351764	-0.0924474			1.119	0.106092	0.0679115	0.0768203	0.0895472	0.140455
	1.12	0.0271854	0.0640934	0.0971834	0.158273	0.131546			1.12	-0.0428125	0.037367	0.0424577	0.078093	0.106092			1.12	-0.136991	-0.114083	-0.0504486	-0.0339037	-0.117901			1.12	0.0971834	0.0679115	0.0870019	0.0997288	0.134091
	1.121	0.037367	0.0691842	0.0997288	0.151909	0.129001			1.121	-0.0313583	0.0322762	0.0513665	0.0679115	0.10991			1.121	-0.1459	-0.0924474	-0.0708117	-0.0389944	-0.134446			1.121	0.108638	0.078093	0.0730023	0.0870019	0.136637
	1.122	0.0322762	0.074275	0.104819	0.141728	0.127728			1.122	-0.0351764	0.0475485	0.0653661	0.0679115	0.107365			1.122	-0.142082	-0.0937201	-0.0606302	-0.0415398	-0.14081			1.122	0.107365	0.0679115	0.0717296	0.0959107	0.130273
	1.123	0.0271854	0.0691842	0.094638	0.144273	0.117546			1.123	-0.0199041	0.0322762	0.0628207	0.0768203	0.101001			1.123	-0.128083	-0.086084	-0.073357	-0.0262675	-0.147173			1.123	0.0844565	0.0870019	0.0691842	0.0959107	0.154454
	1.124	0.037367	0.0640934	0.094638	0.145546	0.0997288			1.124	-0.0402671	0.0284581	0.0500939	0.0717296	0.103547			1.124	-0.142082	-0.0886293	-0.0453579	-0.0313583	-0.176445			1.124	0.0819111	0.0768203	0.074275	0.108638	0.154454
	1.125	0.0322762	0.074275	0.0971834	0.137909	0.107365			1.125	-0.032631	0.0424577	0.0590027	0.0717296	0.115001			1.125	-0.135719	-0.102629	-0.0402671	-0.0237222	-0.154809			1.125	0.108638	0.078093	0.0870019	0.0984561	0.145546
	1.126	0.0437304	0.0704569	0.0997288	0.143	0.0984561			1.126	-0.0249948	0.0335489	0.0399123	0.0730023	0.0920926			1.126	-0.131901	-0.0949928	-0.073357	-0.0313583	-0.171354			1.126	0.104819	0.0793657	0.0755476	0.0920926	0.130273
	1.127	0.0386396	0.0730023	0.0857292	0.121365	0.0882745			1.127	-0.0288129	0.0386396	0.0564573	0.0793657	0.111183			1.127	-0.134446	-0.089902	-0.0580848	-0.036449	-0.186626			1.127	0.108638	0.0653661	0.0768203	0.0959107	0.134091
	1.128	0.0335489	0.0768203	0.101001	0.120092	0.0844565			1.128	-0.0288129	0.0322762	0.0488212	0.0704569	0.102274			1.128	-0.136991	-0.0797205	-0.0440852	-0.0479033	-0.185354			1.128	0.094638	0.0768203	0.0590027	0.094638	0.131546
	1.129	0.0335489	0.0590027	0.0870019	0.120092	0.0819111			1.129	-0.0339037	0.0399123	0.0500939	0.0666388	0.108638			1.129	-0.130628	-0.0873566	-0.0517213	-0.0288129	-0.163718			1.129	0.0920926	0.061548	0.078093	0.115001	0.132819
	1.13	0.0386396	0.0666388	0.102274	0.118819	0.0768203			1.13	-0.0339037	0.0233674	0.0424577	0.0653661	0.108638			1.13	-0.135719	-0.0937201	-0.0619029	-0.0262675	-0.171354			1.13	0.0882745	0.0730023	0.0539119	0.0920926	0.144273
	1.131	0.0322762	0.0602754	0.0920926	0.113728	0.0704569			1.131	-0.032631	0.0437304	0.0539119	0.0717296	0.103547			1.131	-0.139537	-0.100084	-0.0440852	-0.0224495	-0.150991			1.131	0.0997288	0.0704569	0.0666388	0.0844565	0.144273
	1.132	0.0399123	0.0628207	0.0895472	0.111183	0.0717296			1.132	-0.0351764	0.0386396	0.0539119	0.074275	0.0895472			1.132	-0.136991	-0.0835386	-0.0504486	-0.0300856	-0.133174			1.132	0.104819	0.0704569	0.0857292	0.0755476	0.141728
	1.133	0.0271854	0.061548	0.103547	0.0984561	0.0666388			1.133	-0.0517213	0.0450031	0.0488212	0.0730023	0.0971834			1.133	-0.131901	-0.0886293	-0.0580848	-0.0288129	-0.124265			1.133	0.108638	0.0628207	0.0857292	0.0895472	0.130273
	1.134	0.0500939	0.0730023	0.0882745	0.0997288	0.074275			1.134	-0.0389944	0.0488212	0.0526392	0.0666388	0.101001			1.134	-0.129355	-0.0924474	-0.049176	-0.0288129	-0.110265			1.134	0.0857292	0.0551846	0.0844565	0.0831838	0.135364
	1.135	0.0386396	0.0704569	0.0870019	0.0997288	0.0628207			1.135	-0.0300856	0.0335489	0.0450031	0.0653661	0.112456			1.135	-0.115356	-0.102629	-0.0466306	-0.0389944	-0.103902			1.135	0.0933653	0.0730023	0.0870019	0.103547	0.132819
	1.136	0.0386396	0.0640934	0.0984561	0.0895472	0.0653661			1.136	-0.032631	0.041185	0.0539119	0.05773	0.094638			1.136	-0.136991	-0.110265	-0.0631755	-0.0224495	-0.103902			1.136	0.0882745	0.0806384	0.0831838	0.0997288	0.141728
	1.137	0.0322762	0.0717296	0.0908199	0.0971834	0.05773			1.137	-0.0173587	0.0310035	0.0590027	0.0717296	0.113728			1.137	-0.133174	-0.102629	-0.0542667	-0.0224495	-0.073357			1.137	0.108638	0.0806384	0.0806384	0.0971834	0.141728
	1.138	0.041185	0.0666388	0.0997288	0.0882745	0.0730023			1.138	-0.0148133	0.0475485	0.0539119	0.074275	0.0984561			1.138	-0.143355	-0.0809932	-0.0542667	-0.000813741	-0.0606302			1.138	0.106092	0.074275	0.0653661	0.0857292	0.130273
	1.139	0.037367	0.05773	0.0997288	0.0844565	0.074275			1.139	-0.0148133	0.0297308	0.0475485	0.061548	0.102274			1.139	-0.134446	-0.0949928	-0.0555394	0.000458949	-0.0428125			1.139	0.0959107	0.0793657	0.0691842	0.0920926	0.139182
	1.14	0.0475485	0.0666388	0.0895472	0.0870019	0.0704569			1.14	-0.0211768	0.0399123	0.0551846	0.0679115	0.103547			1.14	-0.11281	-0.0949928	-0.0440852	-0.0249948	-0.032631			1.14	0.108638	0.0526392	0.0768203	0.0895472	0.140455
	1.141	0.0322762	0.0730023	0.0984561	0.0882745	0.0691842			1.141	-0.0300856	0.0284581	0.0526392	0.0691842	0.094638			1.141	-0.130628	-0.108992	-0.0479033	-0.0186314	-0.0351764			1.141	0.104819	0.0602754	0.0691842	0.0933653	0.122637
	1.142	0.0386396	0.0704569	0.106092	0.0882745	0.0844565			1.142	-0.00844988	0.0360943	0.0539119	0.0730023	0.106092			1.142	-0.143355	-0.0988109	-0.0593575	-0.0300856	-0.00335912			1.142	0.0997288	0.0590027	0.0844565	0.0933653	0.136637
	1.143	0.0335489	0.0755476	0.101001	0.0819111	0.0755476			1.143	-0.0211768	0.0399123	0.0526392	0.0730023	0.0971834			1.143	-0.12681	-0.0835386	-0.0631755	-0.0199041	-0.000813741			1.143	0.0844565	0.0806384	0.0831838	0.094638	0.134091
	1.144	0.0271854	0.0628207	0.0908199	0.0870019	0.0831838			1.144	-0.0122679	0.0437304	0.0424577	0.0628207	0.0997288			1.144	-0.134446	-0.0644482	-0.0415398	-0.0122679	0.00936778			1.144	0.0920926	0.0870019	0.078093	0.0908199	0.134091
	1.145	0.0360943	0.0679115	0.0895472	0.074275	0.0882745			1.145	-0.0109953	0.0437304	0.0539119	0.061548	0.0971834			1.145	-0.134446	-0.0988109	-0.0555394	0.00300433	0.0297308			1.145	0.0971834	0.0755476	0.0691842	0.0908199	0.132819
	1.146	0.0322762	0.0666388	0.094638	0.0882745	0.0984561			1.146	-0.0186314	0.0462758	0.0386396	0.0590027	0.107365			1.146	-0.130628	-0.0873566	-0.0504486	-0.00844988	0.0284581			1.146	0.108638	0.0679115	0.0640934	0.0959107	0.141728
	1.147	0.041185	0.0679115	0.0959107	0.078093	0.103547			1.147	-0.0199041	0.0360943	0.0475485	0.0602754	0.108638			1.147	-0.130628	-0.102629	-0.0619029	-0.0224495	0.0360943			1.147	0.104819	0.0691842	0.0920926	0.0997288	0.134091
	1.148	0.0360943	0.0640934	0.0997288	0.0870019	0.101001			1.148	-0.0211768	0.0233674	0.0602754	0.0717296	0.102274			1.148	-0.124265	-0.0784478	-0.0453579	-0.00717719	0.0424577			1.148	0.0984561	0.0666388	0.0730023	0.0895472	0.155727
	1.149	0.0360943	0.0704569	0.104819	0.0844565	0.104819			1.149	-0.00844988	0.0424577	0.0475485	0.0793657	0.112456			1.149	-0.116628	-0.102629	-0.052994	-0.00972257	0.061548			1.149	0.0984561	0.0844565	0.0768203	0.0895472	0.136637
	1.15	0.0284581	0.0653661	0.0908199	0.0997288	0.10991			1.15	-0.0122679	0.0322762	0.0500939	0.0806384	0.107365			1.15	-0.12681	-0.0937201	-0.0466306	-0.0199041	0.0704569			1.15	0.0882745	0.0755476	0.0730023	0.0895472	0.120092
	1.151	0.0322762	0.0730023	0.0870019	0.0882745	0.117546			1.151	-0.0199041	0.0450031	0.0335489	0.0704569	0.0959107			1.151	-0.138264	-0.0835386	-0.0593575	-0.0148133	0.078093			1.151	0.101001	0.0691842	0.0793657	0.0882745	0.137909
	1.152	0.0348216	0.0666388	0.0933653	0.0908199	0.113728			1.152	-0.0059045	0.0233674	0.0437304	0.0666388	0.0997288			1.152	-0.135719	-0.0886293	-0.0619029	-0.016086	0.0831838			1.152	0.108638	0.0755476	0.0640934	0.0908199	0.130273
	1.153	0.0437304	0.0539119	0.0933653	0.0997288	0.132819			1.153	0.000458949	0.0335489	0.0666388	0.0704569	0.10991			1.153	-0.120447	-0.0962655	-0.049176	-0.0199041	0.0933653			1.153	0.104819	0.0666388	0.0819111	0.094638	0.134091
	1.154	0.0360943	0.0717296	0.094638	0.0882745	0.118819			1.154	0.000458949	0.0348216	0.05773	0.0793657	0.107365			1.154	-0.125537	-0.0937201	-0.036449	-0.00717719	0.0895472			1.154	0.107365	0.0653661	0.0755476	0.0908199	0.140455
	1.155	0.0284581	0.0564573	0.102274	0.094638	0.135364			1.155	-0.00335912	0.0246401	0.0513665	0.0679115	0.111183			1.155	-0.128083	-0.0975382	-0.0580848	-0.0135406	0.111183			1.155	0.0895472	0.0717296	0.0755476	0.0882745	0.131546
	1.156	0.0526392	0.0755476	0.0984561	0.108638	0.139182			1.156	-0.00335912	0.0475485	0.0475485	0.0895472	0.0984561			1.156	-0.119174	-0.0835386	-0.0542667	-0.0148133	0.113728			1.156	0.0933653	0.0691842	0.0806384	0.0882745	0.134091
	1.157	0.0348216	0.0717296	0.0933653	0.121365	0.145546			1.157	-0.00335912	0.041185	0.0500939	0.0793657	0.106092			1.157	-0.116628	-0.0988109	-0.0542667	-0.0186314	0.103547			1.157	0.106092	0.0653661	0.0793657	0.0971834	0.140455
	1.158	0.0386396	0.0628207	0.0971834	0.113728	0.150636			1.158	0.00300433	0.0322762	0.0488212	0.0730023	0.104819			1.158	-0.122992	-0.0886293	-0.0542667	0.00936778	0.122637			1.158	0.0959107	0.0640934	0.0755476	0.094638	0.137909
	1.159	0.0437304	0.0679115	0.0933653	0.121365	0.143			1.159	-0.00463181	0.0539119	0.0539119	0.0666388	0.118819			1.159	-0.136991	-0.105174	-0.0580848	-0.0186314	0.121365			1.159	0.102274	0.0819111	0.0831838	0.0959107	0.125183
	1.16	0.0437304	0.0653661	0.10991	0.125183	0.160818			1.16	-0.0211768	0.0450031	0.0488212	0.0793657	0.0997288			1.16	-0.130628	-0.086084	-0.0377217	-0.00844988	0.136637			1.16	0.102274	0.0628207	0.0730023	0.094638	0.143
	1.161	0.0348216	0.0730023	0.094638	0.127728	0.148091			1.161	-0.00208643	0.0310035	0.0551846	0.0819111	0.0997288			1.161	-0.12681	-0.086084	-0.0555394	-0.0135406	0.131546			1.161	0.106092	0.0831838	0.0768203	0.104819	0.125183
	1.162	0.0386396	0.0640934	0.0984561	0.117546	0.170999			1.162	0.00936778	0.0437304	0.0526392	0.0666388	0.103547			1.162	-0.131901	-0.100084	-0.0466306	-0.00717719	0.139182			1.162	0.101001	0.0539119	0.0819111	0.0908199	0.140455
	1.163	0.0310035	0.0691842	0.0895472	0.12391	0.160818			1.163	-0.00335912	0.0322762	0.0539119	0.0768203	0.118819			1.163	-0.122992	-0.0988109	-0.0555394	-0.0148133	0.141728			1.163	0.0984561	0.0704569	0.0704569	0.104819	0.149364
	1.164	0.0437304	0.0691842	0.0984561	0.121365	0.160818			1.164	0.00300433	0.0399123	0.0526392	0.0704569	0.113728			1.164	-0.119174	-0.103902	-0.0517213	-0.0122679	0.144273			1.164	0.0997288	0.0730023	0.0806384	0.103547	0.150636
	1.165	0.0182766	0.074275	0.0984561	0.131546	0.183726			1.165	-0.00208643	0.0399123	0.0386396	0.0844565	0.0984561			1.165	-0.131901	-0.0873566	-0.0428125	-0.0109953	0.143			1.165	0.0971834	0.0755476	0.0704569	0.0895472	0.140455
	1.166	0.0437304	0.0679115	0.101001	0.126455	0.169727			1.166	0.00173164	0.0297308	0.0539119	0.0704569	0.108638			1.166	-0.117901	-0.100084	-0.0517213	-0.0109953	0.164636			1.166	0.108638	0.0704569	0.0806384	0.104819	0.137909
	1.167	0.0271854	0.0602754	0.0908199	0.145546	0.17609			1.167	0.00173164	0.0424577	0.0526392	0.0819111	0.107365			1.167	-0.133174	-0.0809932	-0.0440852	-0.0059045	0.154454			1.167	0.0997288	0.0704569	0.0831838	0.104819	0.122637
	1.168	0.0310035	0.0730023	0.104819	0.134091	0.17609			1.168	0.00809509	0.037367	0.0526392	0.0691842	0.104819			1.168	-0.135719	-0.0988109	-0.0504486	0.00554971	0.157			1.168	0.102274	0.0730023	0.0691842	0.0730023	0.134091
	1.169	0.0335489	0.0640934	0.101001	0.146818	0.173545			1.169	-0.000813741	0.0348216	0.0526392	0.0602754	0.103547			1.169	-0.12681	-0.0822659	-0.0389944	-0.0122679	0.169727			1.169	0.0920926	0.0691842	0.0819111	0.094638	0.136637
	1.17	0.0271854	0.0730023	0.0908199	0.150636	0.183726			1.17	-0.00335912	0.0564573	0.0602754	0.0857292	0.111183			1.17	-0.120447	-0.0988109	-0.0440852	-0.0122679	0.181181			1.17	0.0882745	0.0806384	0.0717296	0.0959107	0.146818
	1.171	0.0386396	0.0691842	0.0920926	0.139182	0.187544			1.171	0.00427702	0.0437304	0.0564573	0.078093	0.112456			1.171	-0.122992	-0.103902	-0.0453579	-0.0249948	0.150636			1.171	0.103547	0.0691842	0.0844565	0.0819111	0.122637
	1.172	0.0360943	0.0679115	0.0984561	0.139182	0.19009			1.172	0.00809509	0.0297308	0.0602754	0.078093	0.117546			1.172	-0.116628	-0.089902	-0.036449	-0.0059045	0.172272			1.172	0.0933653	0.074275	0.0844565	0.0870019	0.159545
	1.173	0.0399123	0.0526392	0.0971834	0.150636	0.195181			1.173	0.00427702	0.0335489	0.0386396	0.0870019	0.0971834			1.173	-0.12681	-0.0988109	-0.0606302	-0.00208643	0.179908			1.173	0.104819	0.0691842	0.0844565	0.104819	0.135364
	1.174	0.0284581	0.074275	0.107365	0.157	0.197726			1.174	0.00427702	0.0297308	0.0691842	0.0793657	0.113728			1.174	-0.11281	-0.0784478	-0.049176	-0.00717719	0.169727			1.174	0.104819	0.0653661	0.0793657	0.0997288	0.139182
	1.175	0.0386396	0.0819111	0.094638	0.150636	0.198998			1.175	-0.0109953	0.0437304	0.0539119	0.0691842	0.121365			1.175	-0.114083	-0.105174	-0.0644482	-0.0135406	0.177363			1.175	0.0920926	0.0768203	0.0717296	0.107365	0.135364
	1.176	0.0259127	0.0793657	0.106092	0.158273	0.195181			1.176	0.0131859	0.0437304	0.0475485	0.0831838	0.116274			1.176	-0.130628	-0.108992	-0.0669936	-0.00208643	0.169727			1.176	0.078093	0.0590027	0.078093	0.0984561	0.135364
	1.177	0.0399123	0.0691842	0.103547	0.159545	0.202817			1.177	-0.00717719	0.0233674	0.061548	0.078093	0.108638			1.177	-0.128083	-0.0911747	-0.0555394	-0.0148133	0.181181			1.177	0.102274	0.0679115	0.0768203	0.0997288	0.173545
	1.178	0.0424577	0.0666388	0.104819	0.151909	0.206635			1.178	0.00173164	0.0310035	0.0653661	0.078093	0.113728			1.178	-0.129355	-0.0835386	-0.0631755	-0.016086	0.169727			1.178	0.0959107	0.0755476	0.0730023	0.101001	0.160818
	1.179	0.0399123	0.0640934	0.10991	0.154454	0.204089			1.179	-0.0122679	0.0488212	0.0551846	0.0691842	0.111183			1.179	-0.129355	-0.0848113	-0.0428125	-0.0173587	0.17609			1.179	0.0882745	0.0691842	0.0806384	0.0997288	0.146818
	1.18	0.0335489	0.0513665	0.094638	0.172272	0.206635			1.18	0.0170039	0.037367	0.05773	0.0730023	0.101001			1.18	-0.12681	-0.0962655	-0.049176	-0.00844988	0.192635			1.18	0.107365	0.0870019	0.0908199	0.0895472	0.150636
	1.181	0.0386396	0.0564573	0.0920926	0.173545	0.197726			1.181	0.00300433	0.0322762	0.0551846	0.0755476	0.117546			1.181	-0.125537	-0.0975382	-0.0555394	-0.00717719	0.172272			1.181	0.0971834	0.074275	0.074275	0.0997288	0.145546
	1.182	0.0399123	0.0628207	0.0971834	0.165909	0.211725			1.182	0.0119132	0.0348216	0.061548	0.0704569	0.104819			1.182	-0.134446	-0.0848113	-0.036449	-0.0135406	0.181181			1.182	0.0997288	0.0959107	0.0730023	0.103547	0.139182
	1.183	0.0386396	0.0730023	0.0933653	0.16209	0.212998			1.183	0.0068224	0.0488212	0.0628207	0.0857292	0.115001			1.183	-0.129355	-0.0924474	-0.0580848	0.000458949	0.198998			1.183	0.0933653	0.0691842	0.0844565	0.0933653	0.137909
	1.184	0.0475485	0.078093	0.0920926	0.167181	0.218089			1.184	0.00936778	0.0348216	0.0488212	0.074275	0.111183			1.184	-0.129355	-0.106447	-0.0580848	-0.0148133	0.188817			1.184	0.0895472	0.0679115	0.0730023	0.0920926	0.130273
	1.185	0.0386396	0.0704569	0.106092	0.169727	0.20918			1.185	0.0220947	0.037367	0.0539119	0.0666388	0.111183			1.185	-0.131901	-0.101356	-0.0542667	-0.0122679	0.184999			1.185	0.0882745	0.078093	0.0768203	0.0984561	0.141728
	1.186	0.0386396	0.0717296	0.0844565	0.165909	0.220634			1.186	0.0157312	0.0297308	0.0653661	0.074275	0.0971834			1.186	-0.124265	-0.0962655	-0.0555394	0.000458949	0.183726			1.186	0.0984561	0.05773	0.0691842	0.102274	0.143
	1.187	0.0335489	0.0704569	0.0984561	0.165909	0.218089			1.187	0.0182766	0.0360943	0.0679115	0.0793657	0.118819			1.187	-0.125537	-0.0835386	-0.0466306	-0.0199041	0.195181			1.187	0.0882745	0.0704569	0.0768203	0.104819	0.140455
	1.188	0.0437304	0.0628207	0.0997288	0.164636	0.218089			1.188	0.00936778	0.0271854	0.0666388	0.0920926	0.108638			1.188	-0.135719	-0.089902	-0.0568121	0.00300433	0.201544			1.188	0.10991	0.074275	0.0691842	0.078093	0.139182
	1.189	0.0437304	0.0730023	0.102274	0.174817	0.22827			1.189	0.0259127	0.0424577	0.0488212	0.0831838	0.113728			1.189	-0.124265	-0.0937201	-0.0377217	-0.0199041	0.202817			1.189	0.101001	0.0691842	0.0717296	0.0984561	0.137909
	1.19	0.0360943	0.0640934	0.0984561	0.178636	0.226998			1.19	0.0157312	0.0360943	0.0386396	0.074275	0.104819			1.19	-0.130628	-0.086084	-0.0517213	-0.0249948	0.181181			1.19	0.0908199	0.0793657	0.0666388	0.106092	0.139182
	1.191	0.0360943	0.0691842	0.0933653	0.169727	0.225725			1.191	0.00936778	0.0424577	0.0437304	0.0844565	0.122637			1.191	-0.129355	-0.0873566	-0.049176	-0.0237222	0.191362			1.191	0.0959107	0.0717296	0.0844565	0.103547	0.143
	1.192	0.0335489	0.0640934	0.106092	0.173545	0.215543			1.192	0.0157312	0.0386396	0.0602754	0.0831838	0.10991			1.192	-0.134446	-0.0924474	-0.0542667	-0.00717719	0.196453			1.192	0.101001	0.0857292	0.0870019	0.0984561	0.148091
	1.193	0.0424577	0.0602754	0.101001	0.174817	0.230816			1.193	0.0284581	0.0399123	0.0564573	0.0882745	0.12391			1.193	-0.134446	-0.0835386	-0.049176	-0.0122679	0.19009			1.193	0.106092	0.0717296	0.0679115	0.0997288	0.140455
	1.194	0.0399123	0.0730023	0.0984561	0.186272	0.229543			1.194	0.0220947	0.0322762	0.0475485	0.0590027	0.0997288			1.194	-0.122992	-0.0886293	-0.0313583	0.00300433	0.182454			1.194	0.0959107	0.0819111	0.0844565	0.106092	0.134091
	1.195	0.0284581	0.0666388	0.106092	0.182454	0.232089			1.195	0.0170039	0.0335489	0.0513665	0.0793657	0.101001			1.195	-0.128083	-0.0822659	-0.0517213	-0.0148133	0.183726			1.195	0.0933653	0.0717296	0.101001	0.0895472	0.130273
	1.196	0.0297308	0.05773	0.0971834	0.174817	0.237179			1.196	0.0131859	0.0462758	0.0640934	0.0755476	0.107365			1.196	-0.144628	-0.0924474	-0.0606302	-0.016086	0.188817			1.196	0.0971834	0.0653661	0.0819111	0.0997288	0.154454
	1.197	0.0335489	0.0730023	0.102274	0.17609	0.248633			1.197	0.0271854	0.0475485	0.05773	0.0819111	0.120092			1.197	-0.133174	-0.103902	-0.052994	-0.016086	0.184999			1.197	0.0882745	0.0640934	0.074275	0.0997288	0.135364
	1.198	0.0475485	0.0628207	0.0895472	0.168454	0.233361			1.198	0.0259127	0.0360943	0.0488212	0.0755476	0.10991			1.198	-0.128083	-0.0911747	-0.0593575	-0.0237222	0.179908			1.198	0.094638	0.0768203	0.0730023	0.108638	0.145546
	1.199	0.037367	0.0653661	0.106092	0.17609	0.235906			1.199	0.0259127	0.0335489	0.0526392	0.078093	0.0997288			1.199	-0.120447	-0.0797205	-0.0593575	-0.0173587	0.157			1.199	0.101001	0.074275	0.074275	0.103547	0.150636
	1.2	0.0335489	0.0793657	0.103547	0.181181	0.247361			1.2	0.0297308	0.037367	0.0450031	0.0640934	0.113728			1.2	-0.12681	-0.0797205	-0.049176	-0.0173587	0.179908			1.2	0.0844565	0.0844565	0.0730023	0.0870019	0.129001
	1.201	0.037367	0.0691842	0.0933653	0.182454	0.232089			1.201	0.0170039	0.0450031	0.0628207	0.0640934	0.104819			1.201	-0.136991	-0.0937201	-0.049176	-0.0122679	0.159545			1.201	0.0997288	0.0768203	0.0793657	0.0844565	0.132819
	1.202	0.0322762	0.0679115	0.108638	0.184999	0.233361			1.202	0.0131859	0.0386396	0.0462758	0.0882745	0.108638			1.202	-0.135719	-0.0873566	-0.0593575	-0.0148133	0.155727			1.202	0.113728	0.0844565	0.0806384	0.094638	0.134091
	1.203	0.0424577	0.0640934	0.0984561	0.172272	0.221907			1.203	0.0297308	0.0297308	0.0437304	0.0793657	0.112456			1.203	-0.139537	-0.0962655	-0.0542667	-0.0237222	0.146818			1.203	0.0819111	0.0640934	0.0755476	0.0959107	0.127728
	1.204	0.0488212	0.0539119	0.0920926	0.169727	0.224452			1.204	0.0310035	0.0424577	0.0564573	0.0819111	0.111183			1.204	-0.130628	-0.0886293	-0.0504486	-0.0211768	0.12391			1.204	0.0793657	0.0844565	0.0819111	0.0997288	0.140455
	1.205	0.0322762	0.05773	0.0870019	0.178636	0.22318			1.205	0.0310035	0.0360943	0.0539119	0.0831838	0.106092			1.205	-0.139537	-0.089902	-0.052994	-0.0453579	0.139182			1.205	0.104819	0.0755476	0.0806384	0.113728	0.140455
	1.206	0.0437304	0.0640934	0.094638	0.174817	0.220634			1.206	0.0220947	0.0284581	0.05773	0.0704569	0.0984561			1.206	-0.138264	-0.089902	-0.0504486	-0.016086	0.127728			1.206	0.101001	0.074275	0.0831838	0.0984561	0.139182
	1.207	0.0513665	0.0602754	0.0971834	0.178636	0.207907			1.207	0.0284581	0.0360943	0.0475485	0.0755476	0.102274			1.207	-0.148446	-0.0886293	-0.0631755	-0.0237222	0.104819			1.207	0.101001	0.0564573	0.0666388	0.108638	0.122637
	1.208	0.0335489	0.0755476	0.0857292	0.174817	0.215543			1.208	0.0399123	0.0488212	0.0488212	0.0793657	0.112456			1.208	-0.12681	-0.102629	-0.0720844	-0.0186314	0.0857292			1.208	0.102274	0.0717296	0.0870019	0.112456	0.127728
	1.209	0.0322762	0.0666388	0.0997288	0.178636	0.201544			1.209	0.0246401	0.0335489	0.0488212	0.078093	0.10991			1.209	-0.117901	-0.105174	-0.0415398	-0.032631	0.0602754			1.209	0.0997288	0.0806384	0.0870019	0.0997288	0.130273
	1.21	0.0310035	0.0717296	0.0806384	0.169727	0.19009			1.21	0.0246401	0.0284581	0.0386396	0.0870019	0.121365			1.21	-0.128083	-0.089902	-0.0555394	-0.036449	0.0500939			1.21	0.0984561	0.0704569	0.0768203	0.0933653	0.145546
	1.211	0.0335489	0.0590027	0.104819	0.17609	0.184999			1.211	0.0322762	0.041185	0.0462758	0.078093	0.103547			1.211	-0.143355	-0.0784478	-0.0631755	-0.0504486	0.0284581			1.211	0.094638	0.0679115	0.061548	0.094638	0.135364
	1.212	0.041185	0.0640934	0.0895472	0.153182	0.179908			1.212	0.0310035	0.0462758	0.0462758	0.0679115	0.106092			1.212	-0.142082	-0.0873566	-0.0657209	-0.0389944	0.00936778			1.212	0.0908199	0.0793657	0.0819111	0.107365	0.140455
	1.213	0.0348216	0.0653661	0.0920926	0.165909	0.174817			1.213	0.0310035	0.0348216	0.0450031	0.0793657	0.115001			1.213	-0.130628	-0.0835386	-0.0669936	-0.032631	-0.0148133			1.213	0.0933653	0.0691842	0.0806384	0.102274	0.151909
	1.214	0.0220947	0.0691842	0.0971834	0.172272	0.179908			1.214	0.0259127	0.0322762	0.0602754	0.0666388	0.113728			1.214	-0.131901	-0.106447	-0.089902	-0.0479033	-0.0479033			1.214	0.0971834	0.0730023	0.0730023	0.0857292	0.134091
	1.215	0.0259127	0.0602754	0.0908199	0.16209	0.155727			1.215	0.0424577	0.0602754	0.0526392	0.0793657	0.115001			1.215	-0.133174	-0.105174	-0.069539	-0.0453579	-0.0631755			1.215	0.0882745	0.0500939	0.0831838	0.0971834	0.148091
	1.216	0.0335489	0.0640934	0.0933653	0.150636	0.151909			1.216	0.0475485	0.037367	0.0322762	0.0717296	0.0933653			1.216	-0.135719	-0.0924474	-0.0593575	-0.0619029	-0.0962655			1.216	0.104819	0.078093	0.0831838	0.101001	0.132819
	1.217	0.0284581	0.0717296	0.0870019	0.149364	0.150636			1.217	0.0437304	0.0386396	0.0526392	0.0793657	0.108638			1.217	-0.125537	-0.106447	-0.0835386	-0.0479033	-0.115356			1.217	0.0819111	0.0755476	0.0793657	0.0882745	0.144273
	1.218	0.037367	0.0602754	0.0870019	0.151909	0.139182			1.218	0.0284581	0.0271854	0.0539119	0.0704569	0.113728			1.218	-0.124265	-0.0784478	-0.0797205	-0.0479033	-0.147173			1.218	0.0959107	0.0628207	0.0831838	0.0971834	0.139182
	1.219	0.0284581	0.0590027	0.0908199	0.141728	0.127728			1.219	0.0259127	0.0386396	0.0602754	0.0691842	0.0984561			1.219	-0.136991	-0.115356	-0.089902	-0.0542667	-0.187899			1.219	0.108638	0.0768203	0.0691842	0.107365	0.126455
	1.22	0.0348216	0.0564573	0.0831838	0.153182	0.118819			1.22	0.0233674	0.041185	0.05773	0.0704569	0.0959107			1.22	-0.136991	-0.103902	-0.0835386	-0.0631755	-0.218444			1.22	0.108638	0.0768203	0.0666388	0.103547	0.129001
	1.221	0.037367	0.0590027	0.0908199	0.145546	0.111183			1.221	0.0386396	0.0399123	0.0348216	0.0768203	0.104819			1.221	-0.136991	-0.0937201	-0.0669936	-0.0619029	-0.247716			1.221	0.111183	0.0717296	0.0793657	0.102274	0.130273
	1.222	0.037367	0.0539119	0.0920926	0.145546	0.111183			1.222	0.0450031	0.0424577	0.0500939	0.0806384	0.0971834			1.222	-0.139537	-0.0962655	-0.105174	-0.0555394	-0.285896			1.222	0.102274	0.0691842	0.0768203	0.102274	0.137909
	1.223	0.0462758	0.0640934	0.0755476	0.144273	0.0933653			1.223	0.0513665	0.0322762	0.0666388	0.0691842	0.108638			1.223	-0.128083	-0.0962655	-0.106447	-0.0784478	-0.315168			1.223	0.0819111	0.0831838	0.074275	0.106092	0.148091
	1.224	0.0310035	0.0640934	0.0920926	0.130273	0.0819111			1.224	0.0310035	0.0322762	0.0297308	0.0564573	0.115001			1.224	-0.120447	-0.089902	-0.0975382	-0.0759024	-0.360985			1.224	0.0920926	0.0679115	0.0717296	0.0959107	0.145546
	1.225	0.0437304	0.0539119	0.078093	0.130273	0.0768203			1.225	0.0310035	0.0500939	0.0335489	0.0691842	0.104819			1.225	-0.14081	-0.0988109	-0.089902	-0.0809932	-0.416983			1.225	0.108638	0.0628207	0.078093	0.0997288	0.131546
	1.226	0.0437304	0.0488212	0.0755476	0.126455	0.0691842			1.226	0.0297308	0.0271854	0.0399123	0.0679115	0.106092			1.226	-0.138264	-0.11281	-0.089902	-0.0937201	-0.4488			1.226	0.0920926	0.0768203	0.0768203	0.0971834	0.132819
	1.227	0.0233674	0.0628207	0.094638	0.118819	0.0539119			1.227	0.0335489	0.0500939	0.0462758	0.074275	0.0984561			1.227	-0.121719	-0.102629	-0.103902	-0.0886293	-0.489527			1.227	0.0933653	0.0730023	0.0895472	0.0971834	0.135364
	1.228	0.037367	0.0526392	0.0806384	0.111183	0.0539119			1.228	0.0322762	0.0259127	0.0539119	0.0704569	0.106092			1.228	-0.138264	-0.0988109	-0.103902	-0.0911747	-0.536616			1.228	0.10991	0.0666388	0.0717296	0.0908199	0.139182
	1.229	0.041185	0.0640934	0.094638	0.10991	0.0424577			1.229	0.0322762	0.0450031	0.041185	0.0717296	0.0908199			1.229	-0.120447	-0.0937201	-0.101356	-0.0784478	-0.593887			1.229	0.0997288	0.0819111	0.0730023	0.104819	0.12391
	1.23	0.0297308	0.05773	0.0844565	0.108638	0.0220947			1.23	0.0360943	0.037367	0.0360943	0.0730023	0.094638			1.23	-0.124265	-0.115356	-0.0949928	-0.103902	-0.621886			1.23	0.0895472	0.0691842	0.0959107	0.0997288	0.135364
	1.231	0.0386396	0.0653661	0.0806384	0.107365	0.0259127			1.231	0.0335489	0.0335489	0.0564573	0.0602754	0.104819			1.231	-0.136991	-0.0937201	-0.103902	-0.0873566	-0.64734			1.231	0.0997288	0.0640934	0.0590027	0.102274	0.131546
	1.232	0.0348216	0.05773	0.0793657	0.0997288	0.0157312			1.232	0.0399123	0.0271854	0.0564573	0.0844565	0.0984561			1.232	-0.133174	-0.103902	-0.101356	-0.0988109	-0.675339			1.232	0.108638	0.0730023	0.0844565	0.0959107	0.143
	1.233	0.0233674	0.0628207	0.0819111	0.078093	0.0131859			1.233	0.0297308	0.0310035	0.0475485	0.0768203	0.0971834			1.233	-0.115356	-0.111538	-0.0988109	-0.0988109	-0.730065			1.233	0.104819	0.0819111	0.0590027	0.094638	0.121365
	1.234	0.0386396	0.0564573	0.0857292	0.0844565	0.00173164			1.234	0.0399123	0.0450031	0.0500939	0.0590027	0.10991			1.234	-0.11281	-0.114083	-0.0988109	-0.0988109	-0.749155			1.234	0.0870019	0.0564573	0.0768203	0.0806384	0.115001
	1.235	0.0335489	0.0590027	0.0691842	0.0717296	-0.0135406			1.235	0.0322762	0.0488212	0.0399123	0.074275	0.0882745			1.235	-0.115356	-0.119174	-0.0975382	-0.101356	-0.761882			1.235	0.108638	0.0793657	0.0717296	0.101001	0.122637
	1.236	0.0322762	0.0462758	0.0882745	0.0679115	-0.0059045			1.236	0.0360943	0.0284581	0.0450031	0.078093	0.0920926			1.236	-0.144628	-0.121719	-0.086084	-0.0988109	-0.79879			1.236	0.0793657	0.0730023	0.0717296	0.0844565	0.126455
	1.237	0.0195493	0.0462758	0.0882745	0.0857292	-0.0135406			1.237	0.0424577	0.0246401	0.0462758	0.0691842	0.101001			1.237	-0.14081	-0.102629	-0.110265	-0.0975382	-0.793699			1.237	0.103547	0.0793657	0.0882745	0.0908199	0.126455
	1.238	0.0360943	0.0539119	0.0717296	0.0450031	-0.0135406			1.238	0.037367	0.0386396	0.041185	0.0564573	0.0895472			1.238	-0.12681	-0.101356	-0.0988109	-0.0873566	-0.780972			1.238	0.0959107	0.0666388	0.0590027	0.0895472	0.132819
	1.239	0.0360943	0.0526392	0.0717296	0.041185	-0.0300856			1.239	0.037367	0.0424577	0.041185	0.0666388	0.0959107			1.239	-0.122992	-0.111538	-0.0988109	-0.0988109	-0.79879			1.239	0.0959107	0.0666388	0.0691842	0.0895472	0.136637
	1.24	0.0322762	0.0513665	0.0602754	0.0462758	-0.0135406			1.24	0.0424577	0.0424577	0.0360943	0.0539119	0.101001			1.24	-0.121719	-0.10772	-0.0848113	-0.0848113	-0.782245			1.24	0.094638	0.0628207	0.0717296	0.0895472	0.127728
	1.241	0.0437304	0.0526392	0.0831838	0.0284581	-0.0288129			1.241	0.0399123	0.0386396	0.041185	0.0717296	0.0895472			1.241	-0.139537	-0.0988109	-0.0720844	-0.100084	-0.764428			1.241	0.0882745	0.0551846	0.0730023	0.0870019	0.111183
	1.242	0.0386396	0.0526392	0.0844565	0.020822	-0.0135406			1.242	0.0348216	0.0271854	0.0462758	0.0628207	0.101001			1.242	-0.14081	-0.103902	-0.069539	-0.0873566	-0.751701			1.242	0.107365	0.0717296	0.0857292	0.094638	0.115001
	1.243	0.037367	0.0539119	0.0806384	0.0297308	-0.0211768			1.243	0.0284581	0.0348216	0.0437304	0.0704569	0.0819111			1.243	-0.124265	-0.0988109	-0.0848113	-0.073357	-0.735156			1.243	0.0984561	0.05773	0.0704569	0.0997288	0.113728
	1.244	0.0322762	0.0475485	0.0730023	0.0195493	-0.0224495			1.244	0.0360943	0.0526392	0.0462758	0.0666388	0.0908199			1.244	-0.135719	-0.0949928	-0.0886293	-0.0822659	-0.695702			1.244	0.111183	0.0691842	0.0564573	0.0920926	0.108638
	1.245	0.0399123	0.0602754	0.078093	0.0119132	-0.0211768			1.245	0.0462758	0.0335489	0.0386396	0.0500939	0.108638			1.245	-0.114083	-0.105174	-0.0797205	-0.0771751	-0.665158			1.245	0.104819	0.0793657	0.0730023	0.0870019	0.113728
	1.246	0.041185	0.0666388	0.0768203	0.00300433	-0.0199041			1.246	0.0322762	0.041185	0.0475485	0.0666388	0.0844565			1.246	-0.114083	-0.102629	-0.0759024	-0.0835386	-0.635886			1.246	0.094638	0.074275	0.0704569	0.0806384	0.125183
	1.247	0.0322762	0.0564573	0.0857292	0.00173164	-0.0224495			1.247	0.0386396	0.0297308	0.0424577	0.0666388	0.094638			1.247	-0.139537	-0.111538	-0.069539	-0.0644482	-0.609159			1.247	0.102274	0.074275	0.0730023	0.0806384	0.103547
	1.248	0.0424577	0.0640934	0.0819111	0.0068224	0.00300433			1.248	0.041185	0.0488212	0.041185	0.0691842	0.0870019			1.248	-0.11281	-0.11281	-0.0644482	-0.0746297	-0.565888			1.248	0.0819111	0.0666388	0.078093	0.0959107	0.122637
	1.249	0.0475485	0.061548	0.0730023	0.00809509	-0.00208643			1.249	0.041185	0.0424577	0.0500939	0.0526392	0.0959107			1.249	-0.134446	-0.101356	-0.0822659	-0.0542667	-0.537889			1.249	0.102274	0.0717296	0.0640934	0.0895472	0.125183
	1.25	0.0310035	0.0551846	0.0959107	0.0131859	0.00554971			1.25	0.0399123	0.0310035	0.0475485	0.078093	0.0908199			1.25	-0.121719	-0.106447	-0.069539	-0.069539	-0.507344			1.25	0.101001	0.078093	0.0870019	0.0882745	0.115001
	1.251	0.0259127	0.0526392	0.0819111	0.000458949	0.00427702			1.251	0.0360943	0.037367	0.0462758	0.05773	0.0895472			1.251	-0.134446	-0.100084	-0.073357	-0.069539	-0.464073			1.251	0.0933653	0.0640934	0.0870019	0.0793657	0.104819
	1.252	0.037367	0.0691842	0.0857292	0.0131859	0.0170039			1.252	0.0360943	0.0284581	0.0450031	0.0653661	0.094638			1.252	-0.131901	-0.11281	-0.0682663	-0.0631755	-0.441164			1.252	0.0971834	0.0602754	0.0768203	0.0933653	0.113728
	1.253	0.0297308	0.0590027	0.078093	0.0170039	0.0259127			1.253	0.0399123	0.0322762	0.0462758	0.0640934	0.0920926			1.253	-0.125537	-0.106447	-0.0822659	-0.089902	-0.414438			1.253	0.102274	0.0666388	0.0691842	0.0908199	0.118819
	1.254	0.0360943	0.0450031	0.0768203	0.0170039	0.0182766			1.254	0.041185	0.0424577	0.0450031	0.0793657	0.0971834			1.254	-0.125537	-0.11281	-0.0822659	-0.089902	-0.387711			1.254	0.0908199	0.05773	0.0513665	0.0870019	0.116274
	1.255	0.0360943	0.0691842	0.0755476	0.0144585	0.0233674			1.255	0.0424577	0.0335489	0.0551846	0.0691842	0.0959107			1.255	-0.12681	-0.101356	-0.0657209	-0.0873566	-0.349531			1.255	0.0857292	0.0666388	0.0908199	0.102274	0.101001
	1.256	0.0424577	0.0602754	0.074275	0.0259127	0.0399123			1.256	0.0310035	0.0488212	0.0475485	0.0564573	0.0933653			1.256	-0.128083	-0.0886293	-0.069539	-0.0631755	-0.340622			1.256	0.0908199	0.0666388	0.0640934	0.0857292	0.113728
	1.257	0.0386396	0.061548	0.0831838	0.0488212	0.0475485			1.257	0.0424577	0.037367	0.0526392	0.0653661	0.0933653			1.257	-0.125537	-0.105174	-0.0708117	-0.069539	-0.307532			1.257	0.107365	0.0691842	0.0679115	0.0895472	0.115001
	1.258	0.0284581	0.0462758	0.0844565	0.0386396	0.0526392			1.258	0.0450031	0.0220947	0.0437304	0.0628207	0.0933653			1.258	-0.125537	-0.0924474	-0.0631755	-0.0771751	-0.29226			1.258	0.102274	0.0831838	0.078093	0.0882745	0.112456
	1.259	0.0271854	0.05773	0.0844565	0.0386396	0.061548			1.259	0.0488212	0.0360943	0.0437304	0.0628207	0.0793657			1.259	-0.125537	-0.106447	-0.0593575	-0.0708117	-0.282078			1.259	0.0933653	0.0831838	0.078093	0.0857292	0.12391
	1.26	0.0360943	0.0717296	0.078093	0.0462758	0.0666388			1.26	0.0386396	0.0399123	0.05773	0.0526392	0.094638			1.26	-0.110265	-0.0937201	-0.049176	-0.0453579	-0.252806			1.26	0.0870019	0.05773	0.0704569	0.0882745	0.115001
	1.261	0.0399123	0.05773	0.0793657	0.0500939	0.0691842			1.261	0.0310035	0.0246401	0.0284581	0.0539119	0.112456			1.261	-0.124265	-0.089902	-0.069539	-0.0568121	-0.231171			1.261	0.0984561	0.0666388	0.0666388	0.0857292	0.115001
	1.262	0.0399123	0.0564573	0.078093	0.0602754	0.0768203			1.262	0.0462758	0.0335489	0.0475485	0.074275	0.0933653			1.262	-0.128083	-0.089902	-0.0542667	-0.0517213	-0.208262			1.262	0.104819	0.0551846	0.0730023	0.0806384	0.116274
	1.263	0.0424577	0.061548	0.0844565	0.0691842	0.0730023			1.263	0.0271854	0.037367	0.0348216	0.0590027	0.0908199			1.263	-0.120447	-0.100084	-0.0593575	-0.0682663	-0.200626			1.263	0.094638	0.0628207	0.0768203	0.0882745	0.120092
	1.264	0.0335489	0.05773	0.0819111	0.0590027	0.0831838			1.264	0.0462758	0.0335489	0.05773	0.0691842	0.0806384			1.264	-0.122992	-0.0988109	-0.073357	-0.0428125	-0.170081			1.264	0.0971834	0.0666388	0.0628207	0.0882745	0.106092
	1.265	0.0348216	0.05773	0.0895472	0.0691842	0.0908199			1.265	0.0450031	0.0335489	0.0462758	0.0679115	0.0882745			1.265	-0.110265	-0.106447	-0.0606302	-0.052994	-0.171354			1.265	0.0971834	0.074275	0.0691842	0.103547	0.111183
	1.266	0.0462758	0.0704569	0.0793657	0.0704569	0.0933653			1.266	0.0348216	0.0488212	0.0475485	0.0704569	0.102274			1.266	-0.120447	-0.0911747	-0.0606302	-0.0580848	-0.149718			1.266	0.101001	0.0679115	0.0768203	0.0933653	0.121365
	1.267	0.0310035	0.0564573	0.0768203	0.0844565	0.0984561			1.267	0.0348216	0.0297308	0.0488212	0.0730023	0.0844565			1.267	-0.121719	-0.0835386	-0.052994	-0.0580848	-0.131901			1.267	0.0920926	0.0640934	0.0717296	0.0831838	0.117546
	1.268	0.0360943	0.074275	0.0870019	0.0844565	0.10991			1.268	0.0424577	0.0271854	0.0437304	0.0590027	0.10991			1.268	-0.114083	-0.086084	-0.0644482	-0.0428125	-0.119174			1.268	0.0984561	0.0831838	0.0730023	0.0908199	0.104819
	1.269	0.0360943	0.0602754	0.0882745	0.0831838	0.106092			1.269	0.0424577	0.0310035	0.0462758	0.0666388	0.0971834			1.269	-0.116628	-0.102629	-0.0542667	-0.0555394	-0.10772			1.269	0.0920926	0.0539119	0.0602754	0.0959107	0.108638
	1.27	0.037367	0.0640934	0.0831838	0.0984561	0.106092			1.27	0.037367	0.0437304	0.0500939	0.0602754	0.107365			1.27	-0.120447	-0.0873566	-0.069539	-0.0517213	-0.0784478			1.27	0.107365	0.0730023	0.0717296	0.0895472	0.101001
	1.271	0.0297308	0.061548	0.0882745	0.0933653	0.122637			1.271	0.0386396	0.041185	0.041185	0.0628207	0.101001			1.271	-0.121719	-0.0911747	-0.0580848	-0.0593575	-0.0682663			1.271	0.094638	0.0717296	0.0666388	0.0895472	0.115001
	1.272	0.041185	0.0628207	0.0882745	0.104819	0.120092			1.272	0.0462758	0.0360943	0.0437304	0.0755476	0.0844565			1.272	-0.105174	-0.0975382	-0.0580848	-0.0555394	-0.0631755			1.272	0.0908199	0.0564573	0.061548	0.0882745	0.112456
	1.273	0.0297308	0.0640934	0.0895472	0.094638	0.117546			1.273	0.0284581	0.041185	0.037367	0.0640934	0.0959107			1.273	-0.117901	-0.0924474	-0.0606302	-0.0351764	-0.0631755			1.273	0.0984561	0.0640934	0.078093	0.0920926	0.117546
	1.274	0.0297308	0.0564573	0.0920926	0.10991	0.132819			1.274	0.041185	0.0233674	0.0590027	0.0640934	0.0971834			1.274	-0.12681	-0.0988109	-0.069539	-0.0542667	-0.0428125			1.274	0.0984561	0.0793657	0.078093	0.0844565	0.113728
	1.275	0.041185	0.0628207	0.0844565	0.0984561	0.131546			1.275	0.041185	0.0259127	0.0640934	0.0628207	0.0984561			1.275	-0.130628	-0.100084	-0.0669936	-0.0504486	-0.0517213			1.275	0.0844565	0.0793657	0.0691842	0.106092	0.113728
	1.276	0.0284581	0.0602754	0.0895472	0.115001	0.137909			1.276	0.0399123	0.0437304	0.0360943	0.0564573	0.0870019			1.276	-0.119174	-0.0924474	-0.0542667	-0.0504486	-0.0313583			1.276	0.0895472	0.0704569	0.074275	0.0971834	0.113728
	1.277	0.0437304	0.0640934	0.0819111	0.111183	0.143			1.277	0.037367	0.0310035	0.0450031	0.0717296	0.094638			1.277	-0.120447	-0.102629	-0.0479033	-0.0555394	-0.0148133			1.277	0.0984561	0.0679115	0.0704569	0.0704569	0.112456
	1.278	0.0322762	0.0513665	0.0882745	0.106092	0.141728			1.278	0.0437304	0.0488212	0.0500939	0.0640934	0.0908199			1.278	-0.115356	-0.0873566	-0.0708117	-0.0339037	-0.00335912			1.278	0.0984561	0.0640934	0.0704569	0.094638	0.121365
	1.279	0.0259127	0.0640934	0.0793657	0.112456	0.141728			1.279	0.0437304	0.0322762	0.0488212	0.0691842	0.106092			1.279	-0.125537	-0.0988109	-0.0631755	-0.0428125	0.00173164			1.279	0.0908199	0.0755476	0.0539119	0.0857292	0.121365
	1.28	0.041185	0.0666388	0.0768203	0.120092	0.16209			1.28	0.0462758	0.0335489	0.0475485	0.0653661	0.107365			1.28	-0.115356	-0.086084	-0.0631755	-0.0479033	0.0131859			1.28	0.0895472	0.0602754	0.0704569	0.0997288	0.107365
	1.281	0.0386396	0.0526392	0.0882745	0.12391	0.149364			1.281	0.0475485	0.0424577	0.0360943	0.061548	0.0895472			1.281	-0.116628	-0.0835386	-0.0542667	-0.0377217	0.00554971			1.281	0.108638	0.0628207	0.0704569	0.0857292	0.118819
	1.282	0.037367	0.0590027	0.0895472	0.132819	0.160818			1.282	0.0424577	0.0488212	0.0526392	0.0653661	0.0895472			1.282	-0.120447	-0.0873566	-0.0606302	-0.0428125	0.0119132			1.282	0.0997288	0.0691842	0.0590027	0.0971834	0.113728
	1.283	0.0360943	0.061548	0.0806384	0.129001	0.160818			1.283	0.0271854	0.0348216	0.0437304	0.0653661	0.0971834			1.283	-0.125537	-0.0962655	-0.0555394	-0.0440852	0.0271854			1.283	0.0844565	0.0640934	0.074275	0.0908199	0.113728
	1.284	0.0360943	0.0640934	0.0819111	0.125183	0.168454			1.284	0.0399123	0.0259127	0.0360943	0.0679115	0.0997288			1.284	-0.119174	-0.0962655	-0.049176	-0.0466306	0.0297308			1.284	0.0971834	0.0831838	0.0717296	0.0806384	0.103547
	1.285	0.0462758	0.0602754	0.0844565	0.136637	0.167181			1.285	0.0450031	0.0195493	0.0551846	0.074275	0.0908199			1.285	-0.136991	-0.0924474	-0.0682663	-0.0428125	0.0488212			1.285	0.0882745	0.0704569	0.0768203	0.0844565	0.106092
	1.286	0.0360943	0.0513665	0.0895472	0.144273	0.179908			1.286	0.0437304	0.0462758	0.041185	0.0679115	0.0857292			1.286	-0.110265	-0.089902	-0.0555394	-0.0440852	0.0488212			1.286	0.094638	0.0640934	0.0857292	0.0831838	0.132819
	1.287	0.0310035	0.05773	0.0768203	0.121365	0.174817			1.287	0.0322762	0.0220947	0.0424577	0.0539119	0.103547			1.287	-0.129355	-0.0949928	-0.0479033	-0.0542667	0.0602754			1.287	0.0844565	0.0768203	0.0717296	0.0882745	0.115001
	1.288	0.0335489	0.0500939	0.0831838	0.12391	0.17609			1.288	0.0310035	0.0437304	0.0500939	0.05773	0.0882745			1.288	-0.129355	-0.0886293	-0.0631755	-0.0466306	0.0450031			1.288	0.102274	0.0640934	0.074275	0.0959107	0.10991
	1.289	0.0259127	0.0462758	0.0768203	0.134091	0.181181			1.289	0.0462758	0.0310035	0.0564573	0.061548	0.0984561			1.289	-0.121719	-0.0949928	-0.052994	-0.0377217	0.0666388			1.289	0.10991	0.074275	0.0717296	0.0984561	0.122637
	1.29	0.0360943	0.0526392	0.0882745	0.139182	0.191362			1.29	0.0424577	0.0310035	0.0386396	0.0602754	0.0908199			1.29	-0.120447	-0.0962655	-0.0657209	-0.0389944	0.0679115			1.29	0.0882745	0.0653661	0.074275	0.0895472	0.112456
	1.291	0.0335489	0.0730023	0.0857292	0.141728	0.198998			1.291	0.037367	0.0424577	0.0424577	0.0602754	0.0882745			1.291	-0.121719	-0.0835386	-0.0644482	-0.049176	0.0602754			1.291	0.0971834	0.0691842	0.0768203	0.0908199	0.101001
	1.292	0.0246401	0.05773	0.0844565	0.149364	0.188817			1.292	0.0424577	0.0271854	0.0386396	0.0539119	0.0920926			1.292	-0.108992	-0.0873566	-0.0517213	-0.0453579	0.074275			1.292	0.0971834	0.0628207	0.0691842	0.0933653	0.12391
	1.293	0.0335489	0.0704569	0.0870019	0.148091	0.202817			1.293	0.0539119	0.0462758	0.0475485	0.0653661	0.0933653			1.293	-0.122992	-0.0771751	-0.049176	-0.0619029	0.0640934			1.293	0.104819	0.0691842	0.0640934	0.0959107	0.112456
	1.294	0.0297308	0.05773	0.0971834	0.170999	0.201544			1.294	0.0335489	0.0322762	0.05773	0.061548	0.0920926			1.294	-0.117901	-0.105174	-0.052994	-0.0428125	0.0831838			1.294	0.0920926	0.078093	0.0590027	0.0870019	0.108638
	1.295	0.0322762	0.0640934	0.0793657	0.145546	0.191362			1.295	0.0437304	0.0220947	0.0590027	0.0793657	0.0920926			1.295	-0.122992	-0.101356	-0.0580848	-0.0504486	0.0920926			1.295	0.0933653	0.0691842	0.0857292	0.0997288	0.118819
	1.296	0.0335489	0.0564573	0.0819111	0.149364	0.20918			1.296	0.041185	0.0335489	0.041185	0.0793657	0.101001			1.296	-0.124265	-0.0797205	-0.0593575	-0.0351764	0.0870019			1.296	0.0908199	0.0755476	0.0679115	0.0895472	0.117546
	1.297	0.0399123	0.0526392	0.0844565	0.157	0.207907			1.297	0.0437304	0.0475485	0.0424577	0.0564573	0.0895472			1.297	-0.117901	-0.0848113	-0.073357	-0.0479033	0.0870019			1.297	0.0997288	0.0628207	0.0628207	0.0806384	0.125183
	1.298	0.037367	0.0679115	0.0882745	0.148091	0.207907			1.298	0.037367	0.041185	0.0399123	0.0768203	0.0857292			1.298	-0.122992	-0.0949928	-0.0542667	-0.0288129	0.106092			1.298	0.0920926	0.074275	0.0640934	0.106092	0.115001
	1.299	0.0310035	0.061548	0.0831838	0.157	0.215543			1.299	0.037367	0.0310035	0.0322762	0.0704569	0.101001			1.299	-0.14081	-0.086084	-0.0389944	-0.0453579	0.10991			1.299	0.0971834	0.0717296	0.074275	0.0920926	0.111183
	1.3	0.0284581	0.0564573	0.0895472	0.155727	0.206635			1.3	0.0437304	0.0386396	0.0564573	0.0768203	0.0933653			1.3	-0.124265	-0.0988109	-0.0542667	-0.049176	0.102274			1.3	0.104819	0.0679115	0.0730023	0.0933653	0.113728
	1.301	0.041185	0.0500939	0.0793657	0.163363	0.225725			1.301	0.0437304	0.0399123	0.0488212	0.0640934	0.094638			1.301	-0.124265	-0.0835386	-0.0631755	-0.0479033	0.0971834			1.301	0.0895472	0.0640934	0.0590027	0.0895472	0.112456
	1.302	0.0297308	0.0488212	0.0920926	0.164636	0.216816			1.302	0.037367	0.0259127	0.0488212	0.0602754	0.0933653			1.302	-0.139537	-0.100084	-0.0593575	-0.0428125	0.115001			1.302	0.10991	0.0653661	0.0844565	0.094638	0.115001
	1.303	0.0450031	0.0500939	0.0959107	0.158273	0.214271			1.303	0.0564573	0.0322762	0.0462758	0.0526392	0.102274			1.303	-0.136991	-0.0911747	-0.0657209	-0.049176	0.125183			1.303	0.078093	0.074275	0.061548	0.0895472	0.115001
	1.304	0.0284581	0.0640934	0.0844565	0.16209	0.202817			1.304	0.0386396	0.0284581	0.0564573	0.0653661	0.0831838			1.304	-0.124265	-0.0937201	-0.0606302	-0.0453579	0.118819			1.304	0.0959107	0.0666388	0.0755476	0.0831838	0.121365
	1.305	0.0360943	0.0551846	0.0870019	0.164636	0.214271			1.305	0.0437304	0.0526392	0.0462758	0.0679115	0.0920926			1.305	-0.150991	-0.0911747	-0.036449	-0.0339037	0.130273			1.305	0.104819	0.0691842	0.078093	0.0768203	0.139182
	1.306	0.0335489	0.0539119	0.0895472	0.17609	0.221907			1.306	0.0513665	0.0310035	0.0539119	0.0640934	0.0908199			1.306	-0.130628	-0.102629	-0.0542667	-0.0440852	0.137909			1.306	0.0997288	0.0704569	0.0870019	0.0857292	0.0997288
	1.307	0.0437304	0.0666388	0.094638	0.165909	0.221907			1.307	0.0360943	0.0335489	0.05773	0.0666388	0.0933653			1.307	-0.119174	-0.0924474	-0.0759024	-0.0428125	0.130273			1.307	0.0895472	0.0730023	0.0755476	0.102274	0.112456
	1.308	0.0284581	0.061548	0.0806384	0.16209	0.224452			1.308	0.0322762	0.0348216	0.0462758	0.0564573	0.0870019			1.308	-0.12681	-0.0937201	-0.049176	-0.0504486	0.129001			1.308	0.101001	0.0704569	0.0844565	0.0908199	0.108638
	1.309	0.0297308	0.0526392	0.094638	0.170999	0.22318			1.309	0.041185	0.037367	0.0399123	0.0679115	0.0844565			1.309	-0.133174	-0.0886293	-0.0517213	-0.0415398	0.12391			1.309	0.103547	0.0819111	0.0590027	0.0882745	0.115001
	1.31	0.0233674	0.0640934	0.0908199	0.164636	0.22318			1.31	0.0450031	0.0386396	0.0437304	0.05773	0.0959107			1.31	-0.129355	-0.0886293	-0.0657209	-0.0389944	0.12391			1.31	0.103547	0.0551846	0.0679115	0.0984561	0.118819
	1.311	0.0386396	0.0602754	0.0844565	0.159545	0.225725			1.311	0.0386396	0.0399123	0.0462758	0.0628207	0.0933653			1.311	-0.133174	-0.0988109	-0.0619029	-0.0351764	0.136637			1.311	0.0819111	0.0679115	0.0590027	0.0933653	0.113728
	1.312	0.0475485	0.0500939	0.0870019	0.160818	0.22827			1.312	0.0475485	0.0437304	0.0437304	0.0653661	0.0857292			1.312	-0.125537	-0.0911747	-0.0631755	-0.0466306	0.143			1.312	0.0920926	0.0793657	0.0793657	0.0908199	0.111183
	1.313	0.0360943	0.0488212	0.0768203	0.170999	0.216816			1.313	0.037367	0.0271854	0.0475485	0.0691842	0.102274			1.313	-0.128083	-0.086084	-0.069539	-0.0466306	0.135364			1.313	0.0870019	0.0793657	0.0768203	0.0691842	0.116274
	1.314	0.037367	0.0628207	0.078093	0.164636	0.233361			1.314	0.0335489	0.0360943	0.0450031	0.0704569	0.0895472			1.314	-0.148446	-0.0886293	-0.049176	-0.0593575	0.134091			1.314	0.0882745	0.0653661	0.0717296	0.0971834	0.125183
	1.315	0.0322762	0.0551846	0.0870019	0.163363	0.226998			1.315	0.041185	0.0437304	0.0322762	0.0730023	0.0933653			1.315	-0.119174	-0.089902	-0.0568121	-0.0657209	0.145546			1.315	0.0933653	0.0704569	0.0679115	0.0895472	0.113728
	1.316	0.037367	0.0666388	0.0857292	0.179908	0.216816			1.316	0.0284581	0.0259127	0.0513665	0.0666388	0.0984561			1.316	-0.124265	-0.0797205	-0.052994	-0.0542667	0.151909			1.316	0.0844565	0.0844565	0.0806384	0.0908199	0.0997288
	1.317	0.0284581	0.0551846	0.0768203	0.169727	0.224452			1.317	0.0488212	0.0360943	0.0488212	0.0488212	0.0793657			1.317	-0.134446	-0.0949928	-0.0542667	-0.0657209	0.140455			1.317	0.0793657	0.0704569	0.074275	0.0831838	0.121365
	1.318	0.0335489	0.0628207	0.0870019	0.173545	0.224452			1.318	0.0475485	0.0335489	0.0437304	0.0602754	0.0920926			1.318	-0.122992	-0.0937201	-0.0619029	-0.049176	0.149364			1.318	0.102274	0.0628207	0.0679115	0.0831838	0.120092
	1.319	0.0297308	0.0602754	0.0806384	0.164636	0.229543			1.319	0.0386396	0.0310035	0.0450031	0.0564573	0.0844565			1.319	-0.115356	-0.111538	-0.052994	-0.0351764	0.150636			1.319	0.0882745	0.0666388	0.0768203	0.0933653	0.0959107
	1.32	0.0437304	0.0564573	0.0768203	0.168454	0.216816			1.32	0.0399123	0.0297308	0.037367	0.0691842	0.0870019			1.32	-0.122992	-0.089902	-0.0657209	-0.0415398	0.141728			1.32	0.104819	0.0717296	0.0640934	0.0844565	0.117546
	1.321	0.037367	0.061548	0.0870019	0.174817	0.216816			1.321	0.0399123	0.0335489	0.0475485	0.0691842	0.0984561			1.321	-0.133174	-0.102629	-0.0377217	-0.0377217	0.149364			1.321	0.0857292	0.074275	0.0653661	0.0908199	0.111183
	1.322	0.0284581	0.061548	0.0997288	0.163363	0.220634			1.322	0.0437304	0.0322762	0.0450031	0.0691842	0.0831838			1.322	-0.142082	-0.0746297	-0.0440852	-0.0453579	0.164636			1.322	0.0971834	0.0691842	0.0793657	0.0793657	0.111183
	1.323	0.0233674	0.0628207	0.0831838	0.17609	0.226998			1.323	0.0424577	0.0297308	0.0450031	0.0679115	0.0870019			1.323	-0.12681	-0.0886293	-0.052994	-0.0428125	0.158273			1.323	0.10991	0.05773	0.0640934	0.0730023	0.116274
	1.324	0.037367	0.0602754	0.0908199	0.184999	0.215543			1.324	0.0437304	0.0360943	0.0386396	0.0539119	0.0870019			1.324	-0.128083	-0.0809932	-0.0720844	-0.0555394	0.182454			1.324	0.0895472	0.0564573	0.0730023	0.0908199	0.130273
	1.325	0.0310035	0.0602754	0.0831838	0.16209	0.220634			1.325	0.0475485	0.0513665	0.0475485	0.0691842	0.0882745			1.325	-0.129355	-0.0924474	-0.0606302	-0.0504486	0.150636			1.325	0.0984561	0.078093	0.0768203	0.094638	0.107365
	1.326	0.037367	0.0539119	0.0857292	0.172272	0.22827			1.326	0.0437304	0.0437304	0.0437304	0.0640934	0.0882745			1.326	-0.125537	-0.102629	-0.0631755	-0.049176	0.168454			1.326	0.0882745	0.0793657	0.0691842	0.0844565	0.130273
	1.327	0.0310035	0.0539119	0.0819111	0.165909	0.225725			1.327	0.0475485	0.0233674	0.0437304	0.0717296	0.0920926			1.327	-0.122992	-0.0886293	-0.0453579	-0.0377217	0.164636			1.327	0.0844565	0.0602754	0.0819111	0.0984561	0.10991
	1.328	0.0297308	0.0590027	0.0844565	0.170999	0.22318			1.328	0.0310035	0.0259127	0.0424577	0.0640934	0.0895472			1.328	-0.124265	-0.105174	-0.0504486	-0.0389944	0.154454			1.328	0.103547	0.0679115	0.0691842	0.0844565	0.103547
	1.329	0.0271854	0.0450031	0.0819111	0.186272	0.22318			1.329	0.0360943	0.0246401	0.0462758	0.05773	0.0971834			1.329	-0.124265	-0.0886293	-0.0580848	-0.0568121	0.179908			1.329	0.0933653	0.0730023	0.074275	0.0882745	0.0971834
	1.33	0.0322762	0.05773	0.0844565	0.170999	0.233361			1.33	0.0437304	0.0310035	0.0640934	0.074275	0.094638			1.33	-0.136991	-0.0962655	-0.0517213	-0.049176	0.165909			1.33	0.0882745	0.0679115	0.0704569	0.0831838	0.122637
	1.331	0.0259127	0.05773	0.0819111	0.17609	0.210453			1.331	0.0399123	0.0335489	0.05773	0.0691842	0.0793657			1.331	-0.136991	-0.0937201	-0.069539	-0.0555394	0.179908			1.331	0.0895472	0.0755476	0.0691842	0.0768203	0.104819
	1.332	0.0386396	0.0640934	0.0806384	0.172272	0.211725			1.332	0.0462758	0.0322762	0.0437304	0.0717296	0.0870019			1.332	-0.114083	-0.106447	-0.0746297	-0.0377217	0.198998			1.332	0.101001	0.0640934	0.0806384	0.0882745	0.108638
	1.333	0.0271854	0.0653661	0.0882745	0.174817	0.226998			1.333	0.0488212	0.0386396	0.0386396	0.0475485	0.0806384			1.333	-0.117901	-0.102629	-0.049176	-0.052994	0.170999			1.333	0.094638	0.0602754	0.074275	0.0793657	0.112456
	1.334	0.0462758	0.0666388	0.0844565	0.178636	0.232089			1.334	0.0437304	0.0335489	0.0399123	0.0500939	0.0971834			1.334	-0.135719	-0.105174	-0.069539	-0.0428125	0.183726			1.334	0.0793657	0.0666388	0.0717296	0.0653661	0.113728
	1.335	0.0297308	0.0551846	0.0831838	0.170999	0.229543			1.335	0.0500939	0.0335489	0.0437304	0.074275	0.0908199			1.335	-0.124265	-0.0962655	-0.0657209	-0.0466306	0.174817			1.335	0.115001	0.05773	0.078093	0.0882745	0.117546
	1.336	0.0284581	0.0564573	0.0895472	0.17609	0.234634			1.336	0.0399123	0.0386396	0.0462758	0.0666388	0.0882745			1.336	-0.134446	-0.0937201	-0.0428125	-0.049176	0.191362			1.336	0.0933653	0.0755476	0.0793657	0.0844565	0.10991
	1.337	0.0450031	0.074275	0.0870019	0.17609	0.226998			1.337	0.0399123	0.0322762	0.0513665	0.0717296	0.0857292			1.337	-0.124265	-0.089902	-0.0580848	-0.0389944	0.206635			1.337	0.0857292	0.0564573	0.0844565	0.0844565	0.104819
	1.338	0.0500939	0.0551846	0.0819111	0.188817	0.237179			1.338	0.0271854	0.0348216	0.0437304	0.0666388	0.0831838			1.338	-0.119174	-0.0937201	-0.0606302	-0.0440852	0.201544			1.338	0.0857292	0.0666388	0.0679115	0.0997288	0.120092
	1.339	0.0386396	0.0602754	0.0920926	0.170999	0.233361			1.339	0.0386396	0.0310035	0.037367	0.0602754	0.0870019			1.339	-0.139537	-0.102629	-0.0504486	-0.0402671	0.192635			1.339	0.0997288	0.0755476	0.0793657	0.0768203	0.115001
	1.34	0.0259127	0.0526392	0.0908199	0.17609	0.235906			1.34	0.0399123	0.0322762	0.0450031	0.0564573	0.0844565			1.34	-0.133174	-0.0937201	-0.0631755	-0.0440852	0.205362			1.34	0.0920926	0.0857292	0.0730023	0.0679115	0.104819
	1.341	0.0335489	0.0526392	0.0831838	0.183726	0.240997			1.341	0.0450031	0.0386396	0.0513665	0.0666388	0.0895472			1.341	-0.119174	-0.0822659	-0.0479033	-0.0402671	0.212998			1.341	0.094638	0.0819111	0.074275	0.0870019	0.101001
	1.342	0.0335489	0.0564573	0.0768203	0.172272	0.235906			1.342	0.0437304	0.0322762	0.0322762	0.074275	0.0831838			1.342	-0.12681	-0.089902	-0.0631755	-0.0428125	0.215543			1.342	0.0984561	0.05773	0.0717296	0.0844565	0.125183
	1.343	0.0335489	0.0590027	0.0870019	0.163363	0.243543			1.343	0.041185	0.0348216	0.0475485	0.0475485	0.0984561			1.343	-0.117901	-0.0937201	-0.0466306	-0.0313583	0.206635			1.343	0.0971834	0.0806384	0.0551846	0.0844565	0.127728
	1.344	0.0437304	0.05773	0.0933653	0.181181	0.249906			1.344	0.0399123	0.0386396	0.0437304	0.0691842	0.0870019			1.344	-0.128083	-0.0911747	-0.0415398	-0.0415398	0.211725			1.344	0.0933653	0.0819111	0.05773	0.0793657	0.120092
	1.345	0.0399123	0.0590027	0.094638	0.170999	0.232089			1.345	0.0526392	0.0297308	0.0488212	0.0666388	0.0857292			1.345	-0.124265	-0.0835386	-0.0644482	-0.052994	0.214271			1.345	0.0984561	0.0539119	0.0920926	0.0806384	0.104819
	1.346	0.0284581	0.0551846	0.0831838	0.169727	0.25627			1.346	0.0513665	0.0386396	0.0488212	0.0666388	0.0844565			1.346	-0.134446	-0.101356	-0.0657209	-0.0440852	0.212998			1.346	0.0857292	0.061548	0.0602754	0.0920926	0.108638
	1.347	0.0284581	0.0526392	0.0831838	0.17609	0.251179			1.347	0.0310035	0.037367	0.0462758	0.0704569	0.0844565			1.347	-0.122992	-0.0937201	-0.0453579	-0.0568121	0.212998			1.347	0.0895472	0.05773	0.078093	0.0819111	0.117546
	1.348	0.041185	0.0602754	0.0831838	0.178636	0.252451			1.348	0.0424577	0.0246401	0.0513665	0.0704569	0.0857292			1.348	-0.12681	-0.0848113	-0.0644482	-0.0517213	0.216816			1.348	0.0920926	0.0653661	0.0602754	0.106092	0.120092
	1.349	0.041185	0.0513665	0.0857292	0.186272	0.248633			1.349	0.0475485	0.0399123	0.0424577	0.0602754	0.108638			1.349	-0.117901	-0.102629	-0.0682663	-0.0479033	0.219362			1.349	0.0870019	0.074275	0.0653661	0.0806384	0.121365
	1.35	0.037367	0.061548	0.0793657	0.181181	0.247361			1.35	0.0475485	0.0284581	0.0322762	0.0691842	0.0908199			1.35	-0.138264	-0.0937201	-0.0555394	-0.0440852	0.22827			1.35	0.0933653	0.0653661	0.0691842	0.0691842	0.108638
	1.351	0.0259127	0.05773	0.0844565	0.169727	0.263906			1.351	0.0259127	0.0386396	0.0475485	0.061548	0.0831838			1.351	-0.119174	-0.0784478	-0.0300856	-0.0389944	0.220634			1.351	0.104819	0.0628207	0.0768203	0.078093	0.122637
	1.352	0.0322762	0.0666388	0.0857292	0.191362	0.258815			1.352	0.0386396	0.0310035	0.0526392	0.0666388	0.0908199			1.352	-0.119174	-0.0988109	-0.052994	-0.0377217	0.224452			1.352	0.104819	0.0666388	0.0730023	0.0730023	0.129001
	1.353	0.037367	0.0513665	0.0882745	0.183726	0.257542			1.353	0.0360943	0.0360943	0.0462758	0.0793657	0.0819111			1.353	-0.12681	-0.100084	-0.0542667	-0.0428125	0.229543			1.353	0.101001	0.0653661	0.0768203	0.0971834	0.111183
	1.354	0.0297308	0.0691842	0.0819111	0.172272	0.26136			1.354	0.0500939	0.0386396	0.0437304	0.0602754	0.0971834			1.354	-0.115356	-0.0848113	-0.049176	-0.0224495	0.232089			1.354	0.108638	0.0666388	0.0768203	0.101001	0.12391
	1.355	0.0310035	0.05773	0.0819111	0.181181	0.267724			1.355	0.0462758	0.0450031	0.0488212	0.0653661	0.103547			1.355	-0.122992	-0.114083	-0.0542667	-0.0517213	0.230816			1.355	0.0997288	0.0730023	0.078093	0.0997288	0.104819
	1.356	0.0259127	0.0488212	0.0819111	0.195181	0.258815			1.356	0.0513665	0.0348216	0.041185	0.0844565	0.0831838			1.356	-0.11281	-0.102629	-0.0428125	-0.052994	0.225725			1.356	0.0997288	0.0666388	0.078093	0.0882745	0.0997288
	1.357	0.0284581	0.0666388	0.094638	0.183726	0.26136			1.357	0.0386396	0.0246401	0.0450031	0.078093	0.0844565			1.357	-0.134446	-0.0822659	-0.0504486	-0.0300856	0.246088			1.357	0.0895472	0.0704569	0.0704569	0.0895472	0.121365
	1.358	0.0246401	0.05773	0.0870019	0.195181	0.280451			1.358	0.0475485	0.0259127	0.0424577	0.061548	0.0971834			1.358	-0.129355	-0.103902	-0.0479033	-0.0428125	0.240997			1.358	0.0857292	0.0602754	0.0717296	0.0831838	0.126455
	1.359	0.020822	0.0475485	0.0768203	0.191362	0.263906			1.359	0.0437304	0.0360943	0.037367	0.05773	0.0997288			1.359	-0.120447	-0.0835386	-0.0479033	-0.0631755	0.235906			1.359	0.0857292	0.0640934	0.0819111	0.094638	0.134091
	1.36	0.0259127	0.0526392	0.0819111	0.186272	0.268997			1.36	0.0488212	0.0284581	0.0539119	0.0691842	0.0870019			1.36	-0.115356	-0.0988109	-0.0593575	-0.0300856	0.215543			1.36	0.0844565	0.0959107	0.0704569	0.078093	0.132819
	1.361	0.0220947	0.0691842	0.0882745	0.184999	0.274087			1.361	0.0322762	0.0259127	0.0526392	0.0679115	0.0857292			1.361	-0.115356	-0.0937201	-0.0440852	-0.0377217	0.226998			1.361	0.0895472	0.0691842	0.0590027	0.0920926	0.115001
	1.362	0.0360943	0.0590027	0.0908199	0.183726	0.280451			1.362	0.0437304	0.0335489	0.0399123	0.0640934	0.0971834			1.362	-0.122992	-0.0975382	-0.0479033	-0.049176	0.233361			1.362	0.0882745	0.0755476	0.0755476	0.0857292	0.121365
	1.363	0.0246401	0.05773	0.0870019	0.205362	0.286814			1.363	0.0500939	0.037367	0.0475485	0.074275	0.0819111			1.363	-0.10772	-0.0848113	-0.0542667	-0.0389944	0.24227			1.363	0.0997288	0.0564573	0.0908199	0.0882745	0.121365
	1.364	0.0322762	0.061548	0.0882745	0.195181	0.282996			1.364	0.0450031	0.0284581	0.0475485	0.0666388	0.0882745			1.364	-0.114083	-0.089902	-0.0619029	-0.0377217	0.252451			1.364	0.101001	0.0730023	0.05773	0.0831838	0.115001
	1.365	0.0322762	0.0666388	0.0895472	0.197726	0.276633			1.365	0.0475485	0.0488212	0.0488212	0.0602754	0.107365			1.365	-0.136991	-0.103902	-0.0428125	-0.0351764	0.246088			1.365	0.094638	0.0793657	0.0704569	0.0895472	0.120092
	1.366	0.0233674	0.05773	0.0908199	0.191362	0.27536			1.366	0.0539119	0.0386396	0.0348216	0.074275	0.0793657			1.366	-0.131901	-0.0949928	-0.0389944	-0.0377217	0.230816			1.366	0.0908199	0.0831838	0.0882745	0.0908199	0.131546
	1.367	0.0182766	0.0551846	0.0870019	0.188817	0.282996			1.367	0.0386396	0.0360943	0.0551846	0.0730023	0.0844565			1.367	-0.130628	-0.0848113	-0.0428125	-0.0402671	0.22827			1.367	0.0997288	0.0730023	0.0691842	0.0768203	0.117546
	1.368	0.0322762	0.061548	0.0984561	0.192635	0.277905			1.368	0.0488212	0.0399123	0.0488212	0.0704569	0.0984561			1.368	-0.124265	-0.089902	-0.0504486	-0.0504486	0.232089			1.368	0.0844565	0.0730023	0.0857292	0.104819	0.106092
	1.369	0.0386396	0.0475485	0.0933653	0.191362	0.282996			1.369	0.0500939	0.0360943	0.0424577	0.074275	0.094638			1.369	-0.124265	-0.110265	-0.049176	-0.0288129	0.244815			1.369	0.0908199	0.0691842	0.0882745	0.0806384	0.120092
	1.37	0.0310035	0.0691842	0.0997288	0.186272	0.282996			1.37	0.0360943	0.0386396	0.0513665	0.0679115	0.0971834			1.37	-0.122992	-0.111538	-0.0466306	-0.0453579	0.24227			1.37	0.0844565	0.0704569	0.0717296	0.0819111	0.139182
	1.371	0.0259127	0.0488212	0.0819111	0.205362	0.288087			1.371	0.0386396	0.0399123	0.0500939	0.0666388	0.0882745			1.371	-0.136991	-0.0962655	-0.052994	-0.0339037	0.249906			1.371	0.0882745	0.0691842	0.0704569	0.0895472	0.131546
	1.372	0.0437304	0.0539119	0.0933653	0.202817	0.284269			1.372	0.0475485	0.0182766	0.0475485	0.0730023	0.0959107			1.372	-0.106447	-0.108992	-0.0542667	-0.0377217	0.232089			1.372	0.0920926	0.0640934	0.0755476	0.0730023	0.122637
	1.373	0.0259127	0.0628207	0.0831838	0.201544	0.286814			1.373	0.0348216	0.0424577	0.0450031	0.0475485	0.0793657			1.373	-0.115356	-0.0949928	-0.049176	-0.0415398	0.248633			1.373	0.0920926	0.0895472	0.0653661	0.0933653	0.134091
	1.374	0.0386396	0.0590027	0.0920926	0.195181	0.279178			1.374	0.0551846	0.0297308	0.0513665	0.074275	0.0959107			1.374	-0.121719	-0.0962655	-0.0542667	-0.049176	0.247361			1.374	0.102274	0.0793657	0.0730023	0.0793657	0.121365
	1.375	0.0271854	0.061548	0.0793657	0.206635	0.281723			1.375	0.0360943	0.0424577	0.0500939	0.0679115	0.107365			1.375	-0.111538	-0.0809932	-0.0657209	-0.0428125	0.233361			1.375	0.0997288	0.0640934	0.0768203	0.0704569	0.127728
	1.376	0.0386396	0.0590027	0.0882745	0.19009	0.296996			1.376	0.0437304	0.0399123	0.0475485	0.0806384	0.094638			1.376	-0.122992	-0.0937201	-0.0555394	-0.0479033	0.247361			1.376	0.0882745	0.0640934	0.0666388	0.0997288	0.107365
	1.377	0.0259127	0.0640934	0.0844565	0.198998	0.286814			1.377	0.0539119	0.0335489	0.041185	0.0640934	0.0793657			1.377	-0.119174	-0.0962655	-0.0479033	-0.0479033	0.235906			1.377	0.094638	0.0590027	0.0730023	0.0895472	0.127728
	1.378	0.0322762	0.0679115	0.0920926	0.200271	0.291905			1.378	0.0488212	0.0386396	0.0462758	0.074275	0.0933653			1.378	-0.108992	-0.136991	-0.0504486	-0.0619029	0.237179			1.378	0.0984561	0.0831838	0.0831838	0.0844565	0.134091
	1.379	0.0322762	0.061548	0.0920926	0.196453	0.288087			1.379	0.0500939	0.0259127	0.0640934	0.0602754	0.0959107			1.379	-0.117901	-0.116628	-0.0542667	-0.0402671	0.234634			1.379	0.0933653	0.0602754	0.0730023	0.0870019	0.139182
	1.38	0.0259127	0.0551846	0.0933653	0.206635	0.279178			1.38	0.0399123	0.0348216	0.0475485	0.0691842	0.0882745			1.38	-0.120447	-0.119174	-0.0453579	-0.0402671	0.243543			1.38	0.0984561	0.0679115	0.0679115	0.0997288	0.10991
	1.381	0.0310035	0.0564573	0.104819	0.195181	0.295723			1.381	0.037367	0.041185	0.0399123	0.0806384	0.101001			1.381	-0.125537	-0.122992	-0.0415398	-0.0389944	0.239725			1.381	0.0920926	0.078093	0.0590027	0.0870019	0.137909
	1.382	0.0386396	0.0602754	0.0895472	0.195181	0.288087			1.382	0.0526392	0.0322762	0.05773	0.078093	0.0933653			1.382	-0.120447	-0.143355	-0.0288129	-0.0440852	0.239725			1.382	0.0857292	0.0730023	0.0640934	0.0920926	0.120092
	1.383	0.0297308	0.0628207	0.0997288	0.20918	0.282996			1.383	0.0500939	0.0437304	0.0513665	0.0679115	0.094638			1.383	-0.119174	-0.138264	-0.0580848	-0.0619029	0.247361			1.383	0.094638	0.0793657	0.0755476	0.078093	0.112456
	1.384	0.0259127	0.0500939	0.0882745	0.20918	0.295723			1.384	0.0640934	0.0284581	0.0399123	0.074275	0.111183			1.384	-0.115356	-0.143355	-0.0593575	-0.0389944	0.235906			1.384	0.0895472	0.0704569	0.0793657	0.0730023	0.117546
	1.385	0.0233674	0.0526392	0.0920926	0.200271	0.295723			1.385	0.037367	0.0335489	0.0526392	0.0640934	0.0870019			1.385	-0.117901	-0.124265	-0.036449	-0.0428125	0.233361			1.385	0.0819111	0.0640934	0.0882745	0.0793657	0.132819
	1.386	0.0259127	0.0691842	0.0908199	0.201544	0.305905			1.386	0.0424577	0.0271854	0.0424577	0.074275	0.0920926			1.386	-0.133174	-0.134446	-0.0555394	-0.0593575	0.251179			1.386	0.103547	0.0640934	0.078093	0.0806384	0.118819
	1.387	0.0233674	0.0590027	0.0971834	0.205362	0.296996			1.387	0.041185	0.0424577	0.0399123	0.0628207	0.0895472			1.387	-0.121719	-0.115356	-0.0619029	-0.036449	0.247361			1.387	0.0806384	0.0768203	0.0844565	0.0959107	0.120092
	1.388	0.0195493	0.061548	0.0857292	0.206635	0.285541			1.388	0.0475485	0.0348216	0.0488212	0.0602754	0.0933653			1.388	-0.125537	-0.131901	-0.0453579	-0.0402671	0.24227			1.388	0.0870019	0.074275	0.078093	0.0908199	0.115001
	1.389	0.0220947	0.0551846	0.0806384	0.204089	0.299541			1.389	0.0539119	0.0360943	0.0475485	0.0653661	0.108638			1.389	-0.122992	-0.108992	-0.0415398	-0.0377217	0.246088			1.389	0.094638	0.0640934	0.0691842	0.0806384	0.116274
	1.39	0.0246401	0.0526392	0.0882745	0.206635	0.290632			1.39	0.0462758	0.0348216	0.0488212	0.0755476	0.0870019			1.39	-0.12681	-0.0949928	-0.0555394	-0.0415398	0.239725			1.39	0.0819111	0.0704569	0.0590027	0.078093	0.140455
	1.391	0.0271854	0.0640934	0.0730023	0.197726	0.288087			1.391	0.0437304	0.0284581	0.0526392	0.0730023	0.0870019			1.391	-0.114083	-0.101356	-0.0517213	-0.0504486	0.247361			1.391	0.0882745	0.0755476	0.0806384	0.0870019	0.120092
	1.392	0.0170039	0.0526392	0.0933653	0.212998	0.291905			1.392	0.0488212	0.0246401	0.0386396	0.0666388	0.0933653			1.392	-0.108992	-0.102629	-0.0453579	-0.0377217	0.243543			1.392	0.0933653	0.074275	0.078093	0.0895472	0.126455
	1.393	0.020822	0.061548	0.0831838	0.20918	0.303359			1.393	0.0526392	0.0450031	0.0297308	0.0628207	0.0844565			1.393	-0.121719	-0.116628	-0.0593575	-0.0389944	0.234634			1.393	0.0997288	0.078093	0.0590027	0.0882745	0.134091
	1.394	0.0195493	0.0551846	0.0844565	0.207907	0.303359			1.394	0.0450031	0.041185	0.05773	0.0717296	0.0882745			1.394	-0.134446	-0.0949928	-0.073357	-0.032631	0.224452			1.394	0.0793657	0.0768203	0.0691842	0.0895472	0.10991
	1.395	0.0322762	0.0539119	0.103547	0.210453	0.293178			1.395	0.0335489	0.0297308	0.0488212	0.074275	0.0971834			1.395	-0.130628	-0.105174	-0.0555394	-0.0453579	0.244815			1.395	0.0844565	0.0628207	0.074275	0.0819111	0.120092
	1.396	0.0220947	0.0628207	0.0844565	0.198998	0.293178			1.396	0.0590027	0.037367	0.0539119	0.061548	0.0908199			1.396	-0.125537	-0.0949928	-0.0389944	-0.0415398	0.247361			1.396	0.0997288	0.0717296	0.0679115	0.0920926	0.122637
	1.397	0.0297308	0.0640934	0.078093	0.206635	0.30845			1.397	0.0437304	0.041185	0.0513665	0.05773	0.0984561			1.397	-0.114083	-0.0835386	-0.0555394	-0.0313583	0.246088			1.397	0.0895472	0.0666388	0.0717296	0.0933653	0.117546
	1.398	0.0284581	0.0564573	0.0831838	0.212998	0.290632			1.398	0.0450031	0.0386396	0.0348216	0.0602754	0.0819111			1.398	-0.12681	-0.089902	-0.0288129	-0.032631	0.219362			1.398	0.0920926	0.0793657	0.0704569	0.0717296	0.122637
	1.399	0.0310035	0.0717296	0.0959107	0.206635	0.299541			1.399	0.0526392	0.0284581	0.0462758	0.0602754	0.0882745			1.399	-0.134446	-0.111538	-0.0580848	-0.0517213	0.233361			1.399	0.102274	0.0640934	0.0819111	0.0920926	0.117546
	1.4	0.0259127	0.0602754	0.0870019	0.192635	0.293178			1.4	0.041185	0.0386396	0.0297308	0.0717296	0.0819111			1.4	-0.135719	-0.089902	-0.0606302	-0.0542667	0.235906			1.4	0.0895472	0.078093	0.0691842	0.0768203	0.125183
	1.401	0.0386396	0.0666388	0.074275	0.205362	0.293178			1.401	0.0360943	0.0386396	0.0399123	0.0704569	0.0844565			1.401	-0.135719	-0.0886293	-0.0479033	-0.0479033	0.229543			1.401	0.104819	0.0666388	0.074275	0.0895472	0.120092
	1.402	0.0195493	0.061548	0.0933653	0.206635	0.289359			1.402	0.0500939	0.0259127	0.0424577	0.0590027	0.0933653			1.402	-0.134446	-0.0937201	-0.0440852	-0.0402671	0.248633			1.402	0.0920926	0.074275	0.0806384	0.0793657	0.104819
	1.403	0.0322762	0.0513665	0.0806384	0.221907	0.299541			1.403	0.0310035	0.0284581	0.0475485	0.0679115	0.0933653			1.403	-0.121719	-0.116628	-0.0580848	-0.0415398	0.243543			1.403	0.0844565	0.0691842	0.0793657	0.0844565	0.115001
	1.404	0.0386396	0.05773	0.0857292	0.197726	0.295723			1.404	0.0640934	0.037367	0.0500939	0.0602754	0.0819111			1.404	-0.130628	-0.10772	-0.0580848	-0.0542667	0.247361			1.404	0.0959107	0.0666388	0.0793657	0.078093	0.117546
	1.405	0.0284581	0.0564573	0.078093	0.204089	0.303359			1.405	0.0360943	0.0284581	0.0437304	0.0653661	0.0971834			1.405	-0.131901	-0.0809932	-0.049176	-0.052994	0.240997			1.405	0.094638	0.0691842	0.0590027	0.0870019	0.130273
	1.406	0.0437304	0.0424577	0.0870019	0.197726	0.296996			1.406	0.0488212	0.0399123	0.0488212	0.0730023	0.0831838			1.406	-0.120447	-0.0975382	-0.0542667	-0.0415398	0.224452			1.406	0.103547	0.0691842	0.0691842	0.0920926	0.112456
	1.407	0.0386396	0.0551846	0.0933653	0.193908	0.290632			1.407	0.0462758	0.0297308	0.0310035	0.0691842	0.0895472			1.407	-0.138264	-0.0962655	-0.0580848	-0.0415398	0.224452			1.407	0.0870019	0.0793657	0.0755476	0.0997288	0.111183
	1.408	0.0335489	0.0526392	0.0920926	0.205362	0.289359			1.408	0.0539119	0.0322762	0.0602754	0.0704569	0.0933653			1.408	-0.124265	-0.0848113	-0.0504486	-0.0542667	0.240997			1.408	0.0882745	0.0755476	0.0730023	0.0831838	0.113728
	1.409	0.0297308	0.0564573	0.0793657	0.201544	0.296996			1.409	0.0539119	0.0322762	0.0437304	0.0640934	0.094638			1.409	-0.138264	-0.115356	-0.052994	-0.0428125	0.230816			1.409	0.094638	0.0755476	0.05773	0.0831838	0.107365
	1.41	0.0233674	0.061548	0.0831838	0.192635	0.286814			1.41	0.041185	0.0322762	0.0399123	0.074275	0.104819			1.41	-0.125537	-0.0962655	-0.0619029	-0.0440852	0.22827			1.41	0.102274	0.0628207	0.074275	0.0666388	0.106092
	1.411	0.0500939	0.0590027	0.0806384	0.196453	0.282996			1.411	0.0475485	0.0424577	0.0551846	0.0640934	0.0806384			1.411	-0.11281	-0.106447	-0.0440852	-0.052994	0.205362			1.411	0.0933653	0.0590027	0.0691842	0.0691842	0.117546
	1.412	0.0475485	0.0730023	0.0819111	0.200271	0.282996			1.412	0.0462758	0.0284581	0.0424577	0.0590027	0.0755476			1.412	-0.119174	-0.0949928	-0.0580848	-0.0504486	0.196453			1.412	0.0831838	0.0768203	0.0768203	0.0831838	0.129001
	1.413	0.020822	0.0488212	0.0908199	0.201544	0.27536			1.413	0.0399123	0.0284581	0.037367	0.05773	0.0895472			1.413	-0.131901	-0.0835386	-0.0657209	-0.0517213	0.207907			1.413	0.0971834	0.0653661	0.0679115	0.0870019	0.10991
	1.414	0.0386396	0.0590027	0.0920926	0.202817	0.272815			1.414	0.0386396	0.0284581	0.0475485	0.0653661	0.0857292			1.414	-0.134446	-0.089902	-0.0555394	-0.0504486	0.204089			1.414	0.0908199	0.0730023	0.0730023	0.0844565	0.120092
	1.415	0.0335489	0.061548	0.0844565	0.188817	0.254997			1.415	0.0590027	0.0271854	0.0437304	0.0717296	0.0959107			1.415	-0.135719	-0.0911747	-0.0593575	-0.052994	0.183726			1.415	0.0997288	0.0526392	0.0717296	0.078093	0.121365
	1.416	0.0310035	0.05773	0.0793657	0.19009	0.26136			1.416	0.0526392	0.0310035	0.041185	0.0666388	0.0895472			1.416	-0.125537	-0.0835386	-0.0542667	-0.069539	0.179908			1.416	0.108638	0.0679115	0.0640934	0.0806384	0.118819
	1.417	0.0284581	0.0526392	0.0908199	0.17609	0.249906			1.417	0.0500939	0.0322762	0.0386396	0.0653661	0.0819111			1.417	-0.14081	-0.0937201	-0.0593575	-0.0555394	0.16209			1.417	0.101001	0.0590027	0.0730023	0.0806384	0.125183
	1.418	0.020822	0.0500939	0.0819111	0.187544	0.248633			1.418	0.0360943	0.0182766	0.0322762	0.0653661	0.0806384			1.418	-0.133174	-0.105174	-0.0657209	-0.0606302	0.158273			1.418	0.0819111	0.0806384	0.0640934	0.0882745	0.103547
	1.419	0.0322762	0.0475485	0.0997288	0.174817	0.247361			1.419	0.05773	0.0259127	0.0526392	0.05773	0.0819111			1.419	-0.136991	-0.0822659	-0.0479033	-0.0720844	0.134091			1.419	0.0819111	0.0730023	0.0691842	0.0819111	0.103547
	1.42	0.0271854	0.0564573	0.0793657	0.195181	0.237179			1.42	0.0526392	0.0271854	0.0628207	0.0640934	0.0768203			1.42	-0.128083	-0.0886293	-0.0555394	-0.069539	0.136637			1.42	0.0870019	0.0717296	0.061548	0.0793657	0.107365
	1.421	0.0220947	0.0551846	0.078093	0.174817	0.229543			1.421	0.0386396	0.0119132	0.0322762	0.0755476	0.0882745			1.421	-0.12681	-0.110265	-0.0657209	-0.0644482	0.117546			1.421	0.0984561	0.0730023	0.078093	0.0768203	0.118819
	1.422	0.0259127	0.05773	0.0857292	0.174817	0.221907			1.422	0.0500939	0.0271854	0.0437304	0.0551846	0.0857292			1.422	-0.129355	-0.102629	-0.0644482	-0.0619029	0.115001			1.422	0.0857292	0.05773	0.0691842	0.0717296	0.10991
	1.423	0.0297308	0.0539119	0.0895472	0.182454	0.212998			1.423	0.0424577	0.0182766	0.0475485	0.0628207	0.094638			1.423	-0.124265	-0.106447	-0.0619029	-0.0606302	0.094638			1.423	0.107365	0.041185	0.0691842	0.0831838	0.121365
	1.424	0.0271854	0.0526392	0.0793657	0.163363	0.219362			1.424	0.0424577	0.0322762	0.0462758	0.0640934	0.0831838			1.424	-0.129355	-0.0988109	-0.0657209	-0.069539	0.074275			1.424	0.0920926	0.0602754	0.0640934	0.078093	0.117546
	1.425	0.0271854	0.0691842	0.0870019	0.168454	0.206635			1.425	0.0539119	0.0284581	0.0348216	0.0691842	0.0666388			1.425	-0.11281	-0.0962655	-0.0466306	-0.0822659	0.0691842			1.425	0.0844565	0.0628207	0.0628207	0.0882745	0.108638
	1.426	0.0259127	0.0500939	0.0768203	0.16209	0.187544			1.426	0.0488212	0.0322762	0.0500939	0.0653661	0.0908199			1.426	-0.116628	-0.0937201	-0.0466306	-0.0657209	0.0640934			1.426	0.0933653	0.0806384	0.0653661	0.0895472	0.111183
	1.427	0.0284581	0.0564573	0.0679115	0.164636	0.196453			1.427	0.0462758	0.037367	0.0399123	0.0539119	0.0768203			1.427	-0.128083	-0.0975382	-0.0644482	-0.0657209	0.0488212			1.427	0.094638	0.0704569	0.0793657	0.0691842	0.108638
	1.428	0.0386396	0.0475485	0.0831838	0.16209	0.186272			1.428	0.0348216	0.0310035	0.041185	0.074275	0.0793657			1.428	-0.119174	-0.0911747	-0.0517213	-0.0720844	0.0233674			1.428	0.0844565	0.0691842	0.074275	0.0857292	0.111183
	1.429	0.0271854	0.0475485	0.078093	0.155727	0.186272			1.429	0.0475485	0.0220947	0.0437304	0.0526392	0.0844565			1.429	-0.12681	-0.0911747	-0.0682663	-0.073357	0.0068224			1.429	0.106092	0.05773	0.0831838	0.0920926	0.118819
	1.43	0.0348216	0.0450031	0.0640934	0.159545	0.178636			1.43	0.0462758	0.0310035	0.0526392	0.0679115	0.0831838			1.43	-0.119174	-0.0975382	-0.0568121	-0.0708117	-0.0249948			1.43	0.104819	0.0590027	0.0691842	0.0971834	0.107365
	1.431	0.0462758	0.0590027	0.0717296	0.160818	0.167181			1.431	0.0462758	0.0297308	0.0310035	0.0640934	0.0793657			1.431	-0.138264	-0.11281	-0.0593575	-0.0708117	-0.016086			1.431	0.0908199	0.0806384	0.0666388	0.0793657	0.126455
	1.432	0.0386396	0.061548	0.0806384	0.144273	0.164636			1.432	0.0475485	0.0297308	0.0437304	0.0602754	0.0844565			1.432	-0.134446	-0.114083	-0.0682663	-0.0619029	-0.0428125			1.432	0.0793657	0.0590027	0.05773	0.0920926	0.113728
	1.433	0.0310035	0.0526392	0.078093	0.145546	0.151909			1.433	0.0539119	0.0284581	0.041185	0.0640934	0.0984561			1.433	-0.129355	-0.0924474	-0.0606302	-0.0835386	-0.0389944			1.433	0.101001	0.0640934	0.0666388	0.0691842	0.117546
	1.434	0.0259127	0.05773	0.0730023	0.130273	0.151909			1.434	0.0462758	0.0360943	0.0297308	0.05773	0.0768203			1.434	-0.125537	-0.0937201	-0.0517213	-0.0835386	-0.0580848			1.434	0.0971834	0.0666388	0.0602754	0.074275	0.116274
	1.435	0.0322762	0.0640934	0.0844565	0.139182	0.125183			1.435	0.0424577	0.020822	0.0462758	0.0500939	0.0819111			1.435	-0.135719	-0.0962655	-0.0720844	-0.073357	-0.0771751			1.435	0.094638	0.0666388	0.0679115	0.0679115	0.104819
	1.436	0.0399123	0.0590027	0.0831838	0.130273	0.135364			1.436	0.0551846	0.0348216	0.0462758	0.0513665	0.0819111			1.436	-0.114083	-0.0835386	-0.049176	-0.0784478	-0.069539			1.436	0.111183	0.0513665	0.0691842	0.0806384	0.108638
	1.437	0.0424577	0.0488212	0.0691842	0.120092	0.129001			1.437	0.05773	0.0284581	0.0335489	0.0755476	0.0844565			1.437	-0.12681	-0.0962655	-0.0542667	-0.073357	-0.0797205			1.437	0.0857292	0.0730023	0.0806384	0.0831838	0.107365
	1.438	0.0322762	0.05773	0.0730023	0.115001	0.118819			1.438	0.0462758	0.037367	0.0462758	0.0666388	0.0793657			1.438	-0.11281	-0.0911747	-0.049176	-0.073357	-0.0771751			1.438	0.0959107	0.0730023	0.0640934	0.0844565	0.121365
	1.439	0.0399123	0.0437304	0.0691842	0.126455	0.111183			1.439	0.0590027	0.0348216	0.0539119	0.0500939	0.078093			1.439	-0.14081	-0.10772	-0.0580848	-0.0682663	-0.0848113			1.439	0.0844565	0.0539119	0.0602754	0.0691842	0.0984561
	1.44	0.0310035	0.0564573	0.0768203	0.115001	0.125183			1.44	0.0475485	0.0170039	0.0360943	0.0602754	0.0844565			1.44	-0.139537	-0.102629	-0.052994	-0.0720844	-0.069539			1.44	0.0806384	0.0513665	0.0831838	0.0793657	0.103547
	1.441	0.0310035	0.0564573	0.074275	0.107365	0.121365			1.441	0.0526392	0.0233674	0.041185	0.05773	0.0730023			1.441	-0.11281	-0.0937201	-0.0593575	-0.0720844	-0.0784478			1.441	0.0895472	0.0526392	0.0691842	0.078093	0.0984561
	1.442	0.0246401	0.0475485	0.0844565	0.0933653	0.108638			1.442	0.0424577	0.0233674	0.0386396	0.0437304	0.078093			1.442	-0.125537	-0.0873566	-0.0555394	-0.0746297	-0.0669936			1.442	0.112456	0.0640934	0.074275	0.0870019	0.117546
	1.443	0.0322762	0.0500939	0.0717296	0.103547	0.101001			1.443	0.0399123	0.0271854	0.0424577	0.0666388	0.0717296			1.443	-0.108992	-0.0911747	-0.0644482	-0.0580848	-0.0631755			1.443	0.0908199	0.0730023	0.0640934	0.0793657	0.10991
	1.444	0.0399123	0.0475485	0.074275	0.0997288	0.101001			1.444	0.0539119	0.0424577	0.0513665	0.061548	0.0704569			1.444	-0.129355	-0.0797205	-0.0669936	-0.0708117	-0.0428125			1.444	0.0819111	0.0628207	0.0704569	0.0870019	0.107365
	1.445	0.0246401	0.0513665	0.0755476	0.0895472	0.0971834			1.445	0.0475485	0.0360943	0.041185	0.0526392	0.0755476			1.445	-0.124265	-0.0911747	-0.0517213	-0.0759024	-0.0109953			1.445	0.0933653	0.0564573	0.0640934	0.074275	0.103547
	1.446	0.0386396	0.0640934	0.0679115	0.0971834	0.0997288			1.446	0.0348216	0.0259127	0.0335489	0.0590027	0.0882745			1.446	-0.119174	-0.0988109	-0.0542667	-0.0555394	-0.016086			1.446	0.0819111	0.0526392	0.061548	0.074275	0.112456
	1.447	0.037367	0.0551846	0.0793657	0.0806384	0.107365			1.447	0.0513665	0.0233674	0.0399123	0.0666388	0.0793657			1.447	-0.122992	-0.089902	-0.052994	-0.0580848	-0.0122679			1.447	0.074275	0.061548	0.0666388	0.0844565	0.111183
	1.448	0.0271854	0.0590027	0.0768203	0.0857292	0.101001			1.448	0.0437304	0.0271854	0.0399123	0.0539119	0.0768203			1.448	-0.134446	-0.086084	-0.0606302	-0.0759024	-0.00463181			1.448	0.0933653	0.061548	0.0755476	0.0882745	0.10991
	1.449	0.0220947	0.0551846	0.0730023	0.0908199	0.106092			1.449	0.0488212	0.0297308	0.037367	0.0539119	0.0844565			1.449	-0.121719	-0.0809932	-0.0517213	-0.0542667	0.0119132			1.449	0.0870019	0.0679115	0.0666388	0.0628207	0.111183
	1.45	0.0271854	0.0500939	0.0679115	0.0679115	0.10991			1.45	0.0424577	0.0271854	0.041185	0.061548	0.0704569			1.45	-0.120447	-0.101356	-0.0517213	-0.0580848	0.0157312			1.45	0.101001	0.0590027	0.074275	0.0819111	0.0971834
	1.451	0.0271854	0.0590027	0.0768203	0.0730023	0.108638			1.451	0.0526392	0.0271854	0.0386396	0.0653661	0.0857292			1.451	-0.119174	-0.0797205	-0.0542667	-0.0669936	0.0475485			1.451	0.0704569	0.078093	0.0551846	0.0730023	0.0971834
	1.452	0.0386396	0.0488212	0.0691842	0.0806384	0.122637			1.452	0.0437304	0.0437304	0.0386396	0.0551846	0.0717296			1.452	-0.119174	-0.0924474	-0.0542667	-0.0580848	0.041185			1.452	0.0831838	0.0590027	0.0602754	0.0793657	0.116274
	1.453	0.037367	0.0526392	0.0691842	0.0755476	0.115001			1.453	0.0475485	0.0310035	0.0437304	0.061548	0.0882745			1.453	-0.133174	-0.101356	-0.0555394	-0.0720844	0.05773			1.453	0.0984561	0.0564573	0.0806384	0.0768203	0.102274
	1.454	0.0310035	0.0602754	0.0831838	0.074275	0.10991			1.454	0.0488212	0.020822	0.0399123	0.0590027	0.0806384			1.454	-0.122992	-0.105174	-0.052994	-0.0517213	0.0475485			1.454	0.0870019	0.0539119	0.0691842	0.0819111	0.113728
	1.455	0.0322762	0.0526392	0.0730023	0.0806384	0.111183			1.455	0.0488212	0.0233674	0.041185	0.0704569	0.074275			1.455	-0.129355	-0.0809932	-0.0682663	-0.0555394	0.0564573			1.455	0.0933653	0.0602754	0.0717296	0.078093	0.0920926
	1.456	0.0297308	0.0526392	0.0806384	0.094638	0.117546			1.456	0.0475485	0.0246401	0.0322762	0.061548	0.078093			1.456	-0.122992	-0.0924474	-0.0631755	-0.0759024	0.0679115			1.456	0.094638	0.0679115	0.0691842	0.0755476	0.113728
	1.457	0.0195493	0.0564573	0.0768203	0.0882745	0.118819			1.457	0.0399123	0.0360943	0.0450031	0.0564573	0.0691842			1.457	-0.133174	-0.0937201	-0.0479033	-0.052994	0.0895472			1.457	0.0730023	0.0691842	0.0640934	0.0730023	0.116274
	1.458	0.0322762	0.0602754	0.074275	0.0895472	0.120092			1.458	0.0602754	0.0195493	0.0462758	0.0640934	0.0819111			1.458	-0.108992	-0.0848113	-0.0555394	-0.0453579	0.0793657			1.458	0.0959107	0.0564573	0.0806384	0.0933653	0.112456
	1.459	0.0271854	0.0691842	0.0857292	0.0882745	0.122637			1.459	0.0437304	0.0310035	0.037367	0.0640934	0.0882745			1.459	-0.119174	-0.0848113	-0.0631755	-0.0682663	0.0971834			1.459	0.0933653	0.0691842	0.0539119	0.0870019	0.103547
	1.46	0.0259127	0.0500939	0.078093	0.0895472	0.130273			1.46	0.0399123	0.0475485	0.0437304	0.0551846	0.074275			1.46	-0.124265	-0.0962655	-0.0542667	-0.0720844	0.0997288			1.46	0.0908199	0.0704569	0.0653661	0.074275	0.116274
	1.461	0.0335489	0.0602754	0.0793657	0.0857292	0.127728			1.461	0.0437304	0.0335489	0.0475485	0.0399123	0.0806384			1.461	-0.138264	-0.103902	-0.0428125	-0.0580848	0.104819			1.461	0.0920926	0.0679115	0.074275	0.0755476	0.115001
	1.462	0.0297308	0.0539119	0.0870019	0.101001	0.129001			1.462	0.0526392	0.0348216	0.0437304	0.0602754	0.0768203			1.462	-0.115356	-0.0848113	-0.052994	-0.0466306	0.117546			1.462	0.0882745	0.0666388	0.078093	0.0806384	0.0984561
	1.463	0.0360943	0.0488212	0.078093	0.0984561	0.131546			1.463	0.0488212	0.0259127	0.0424577	0.0590027	0.0755476			1.463	-0.110265	-0.0924474	-0.0644482	-0.036449	0.104819			1.463	0.078093	0.0564573	0.061548	0.0870019	0.115001
	1.464	0.0259127	0.0539119	0.0755476	0.094638	0.134091			1.464	0.0539119	0.037367	0.0450031	0.0653661	0.0870019			1.464	-0.116628	-0.108992	-0.0389944	-0.0428125	0.112456			1.464	0.0806384	0.0628207	0.0793657	0.0857292	0.10991
	1.465	0.0335489	0.0628207	0.0679115	0.106092	0.130273			1.465	0.0488212	0.037367	0.0399123	0.0539119	0.0857292			1.465	-0.11281	-0.105174	-0.052994	-0.0466306	0.117546			1.465	0.0895472	0.0526392	0.0730023	0.0895472	0.103547
	1.466	0.0310035	0.0564573	0.0793657	0.103547	0.134091			1.466	0.0500939	0.0220947	0.037367	0.0551846	0.0857292			1.466	-0.120447	-0.0949928	-0.0580848	-0.0593575	0.134091			1.466	0.0819111	0.0666388	0.0844565	0.078093	0.117546
	1.467	0.0233674	0.0500939	0.078093	0.112456	0.129001			1.467	0.0386396	0.0297308	0.0399123	0.0590027	0.0768203			1.467	-0.124265	-0.0962655	-0.0377217	-0.032631	0.121365			1.467	0.0755476	0.0640934	0.0640934	0.0679115	0.106092
	1.468	0.0284581	0.0475485	0.0653661	0.125183	0.148091			1.468	0.0526392	0.0233674	0.0297308	0.0539119	0.0793657			1.468	-0.115356	-0.0848113	-0.0466306	-0.0644482	0.140455			1.468	0.0959107	0.05773	0.0730023	0.0870019	0.115001
	1.469	0.0348216	0.0640934	0.0730023	0.118819	0.150636			1.469	0.0564573	0.0271854	0.0450031	0.0730023	0.0844565			1.469	-0.103902	-0.108992	-0.052994	-0.0504486	0.131546			1.469	0.106092	0.0653661	0.05773	0.078093	0.108638
	1.47	0.0322762	0.0500939	0.0640934	0.113728	0.159545			1.47	0.0564573	0.0284581	0.0424577	0.0653661	0.0691842			1.47	-0.121719	-0.100084	-0.0606302	-0.0440852	0.137909			1.47	0.0920926	0.0551846	0.0666388	0.0908199	0.0984561
	1.471	0.0322762	0.0628207	0.0730023	0.120092	0.140455			1.471	0.0360943	0.0360943	0.0475485	0.0526392	0.078093			1.471	-0.105174	-0.0886293	-0.0619029	-0.0504486	0.169727			1.471	0.0895472	0.0500939	0.074275	0.0717296	0.121365
	1.472	0.0348216	0.0640934	0.0691842	0.104819	0.149364			1.472	0.0386396	0.020822	0.0437304	0.0590027	0.0857292			1.472	-0.116628	-0.086084	-0.0479033	-0.0708117	0.141728			1.472	0.0895472	0.0691842	0.0704569	0.0704569	0.0997288
	1.473	0.0386396	0.0526392	0.0691842	0.120092	0.153182			1.473	0.0526392	0.0297308	0.0513665	0.0666388	0.0666388			1.473	-0.114083	-0.103902	-0.0593575	-0.069539	0.146818			1.473	0.0819111	0.0691842	0.0526392	0.0628207	0.117546
	1.474	0.0233674	0.0488212	0.074275	0.117546	0.157			1.474	0.0437304	0.0310035	0.0462758	0.0666388	0.0857292			1.474	-0.119174	-0.101356	-0.0657209	-0.0580848	0.160818			1.474	0.0806384	0.0602754	0.0730023	0.0831838	0.108638
	1.475	0.0386396	0.061548	0.0704569	0.12391	0.169727			1.475	0.0500939	0.037367	0.0259127	0.0564573	0.078093			1.475	-0.110265	-0.101356	-0.0453579	-0.0517213	0.145546			1.475	0.0793657	0.0666388	0.0691842	0.0679115	0.125183
	1.476	0.037367	0.0513665	0.0564573	0.122637	0.163363			1.476	0.0450031	0.0220947	0.0386396	0.061548	0.0806384			1.476	-0.111538	-0.0937201	-0.0504486	-0.0644482	0.165909			1.476	0.0844565	0.0819111	0.0602754	0.0920926	0.0997288
	1.477	0.0348216	0.05773	0.0717296	0.130273	0.174817			1.477	0.0437304	0.0131859	0.041185	0.0628207	0.0704569			1.477	-0.115356	-0.0911747	-0.0453579	-0.0580848	0.157			1.477	0.0882745	0.0513665	0.0704569	0.0793657	0.115001
	1.478	0.0233674	0.05773	0.0755476	0.134091	0.155727			1.478	0.0462758	0.0360943	0.0386396	0.05773	0.0870019			1.478	-0.108992	-0.0924474	-0.0669936	-0.073357	0.165909			1.478	0.0806384	0.0730023	0.0666388	0.0793657	0.10991
	1.479	0.0284581	0.0488212	0.0793657	0.132819	0.165909			1.479	0.0399123	0.0488212	0.0437304	0.05773	0.0844565			1.479	-0.110265	-0.089902	-0.0542667	-0.032631	0.16209			1.479	0.0882745	0.0640934	0.0602754	0.0870019	0.107365
	1.48	0.0284581	0.0704569	0.0768203	0.134091	0.167181			1.48	0.0539119	0.0322762	0.0424577	0.0526392	0.0793657			1.48	-0.114083	-0.089902	-0.0517213	-0.0580848	0.160818			1.48	0.0870019	0.061548	0.0844565	0.0793657	0.129001
	1.481	0.0233674	0.05773	0.0755476	0.12391	0.165909			1.481	0.0450031	0.0233674	0.0437304	0.061548	0.078093			1.481	-0.0975382	-0.0911747	-0.0517213	-0.0479033	0.160818			1.481	0.0844565	0.0640934	0.0730023	0.0870019	0.111183
	1.482	0.0259127	0.0602754	0.0704569	0.131546	0.181181			1.482	0.0335489	0.0271854	0.0271854	0.0526392	0.078093			1.482	-0.121719	-0.0848113	-0.0453579	-0.0682663	0.178636			1.482	0.0870019	0.0539119	0.0819111	0.0806384	0.121365
	1.483	0.0310035	0.0462758	0.0844565	0.136637	0.169727			1.483	0.0386396	0.0297308	0.0437304	0.0730023	0.0819111			1.483	-0.116628	-0.0886293	-0.0542667	-0.0580848	0.184999			1.483	0.0857292	0.0488212	0.0628207	0.0768203	0.0997288
	1.484	0.0322762	0.0488212	0.0730023	0.136637	0.178636			1.484	0.0475485	0.0284581	0.0500939	0.0526392	0.0870019			1.484	-0.0988109	-0.100084	-0.0580848	-0.0644482	0.170999			1.484	0.0895472	0.0513665	0.0640934	0.0997288	0.112456
	1.485	0.0348216	0.0602754	0.0768203	0.127728	0.181181			1.485	0.0513665	0.0360943	0.037367	0.061548	0.078093			1.485	-0.115356	-0.111538	-0.0593575	-0.0644482	0.178636			1.485	0.0806384	0.078093	0.0704569	0.078093	0.120092
	1.486	0.0310035	0.0437304	0.074275	0.150636	0.183726			1.486	0.0437304	0.0386396	0.0310035	0.0730023	0.0768203			1.486	-0.102629	-0.0924474	-0.0593575	-0.0644482	0.177363			1.486	0.0882745	0.0640934	0.0691842	0.0959107	0.102274
	1.487	0.0246401	0.0564573	0.0768203	0.134091	0.17609			1.487	0.0539119	0.0259127	0.0437304	0.0590027	0.0819111			1.487	-0.121719	-0.0886293	-0.0644482	-0.052994	0.178636			1.487	0.0933653	0.0806384	0.074275	0.0730023	0.112456
	1.488	0.0233674	0.0590027	0.0768203	0.129001	0.174817			1.488	0.041185	0.0348216	0.0437304	0.0526392	0.0819111			1.488	-0.119174	-0.0911747	-0.0389944	-0.0644482	0.182454			1.488	0.0959107	0.0628207	0.0564573	0.0691842	0.104819
	1.489	0.0386396	0.0475485	0.0730023	0.141728	0.186272			1.489	0.041185	0.0399123	0.0348216	0.0666388	0.0806384			1.489	-0.105174	-0.0937201	-0.0631755	-0.0504486	0.192635			1.489	0.0755476	0.061548	0.0793657	0.0768203	0.094638
	1.49	0.037367	0.0539119	0.0640934	0.149364	0.181181			1.49	0.0539119	0.0297308	0.0450031	0.0539119	0.0755476			1.49	-0.12681	-0.0937201	-0.052994	-0.0568121	0.195181			1.49	0.0984561	0.0551846	0.0666388	0.0895472	0.112456
	1.491	0.0271854	0.0526392	0.0870019	0.141728	0.192635			1.491	0.0526392	0.0360943	0.0475485	0.0691842	0.074275			1.491	-0.120447	-0.0975382	-0.0555394	-0.0542667	0.17609			1.491	0.0895472	0.074275	0.0679115	0.0971834	0.106092
	1.492	0.0182766	0.0564573	0.0704569	0.146818	0.19009			1.492	0.0513665	0.0437304	0.0297308	0.0602754	0.0755476			1.492	-0.108992	-0.0759024	-0.0479033	-0.0682663	0.183726			1.492	0.094638	0.0628207	0.0704569	0.0793657	0.125183
	1.493	0.0284581	0.041185	0.0704569	0.136637	0.182454			1.493	0.0462758	0.0322762	0.0488212	0.0653661	0.0755476			1.493	-0.106447	-0.101356	-0.0377217	-0.0669936	0.19009			1.493	0.0819111	0.0590027	0.0666388	0.0755476	0.116274
	1.494	0.0348216	0.0488212	0.078093	0.139182	0.182454			1.494	0.0500939	0.0271854	0.0348216	0.0666388	0.0844565			1.494	-0.110265	-0.103902	-0.0504486	-0.0415398	0.186272			1.494	0.0755476	0.0704569	0.0768203	0.0844565	0.115001
	1.495	0.0348216	0.05773	0.0730023	0.149364	0.186272			1.495	0.0246401	0.0297308	0.0437304	0.0640934	0.0691842			1.495	-0.117901	-0.10772	-0.0542667	-0.0479033	0.188817			1.495	0.0959107	0.05773	0.0628207	0.0717296	0.108638
	1.496	0.0360943	0.0564573	0.0793657	0.137909	0.205362			1.496	0.05773	0.0348216	0.0246401	0.0653661	0.0768203			1.496	-0.128083	-0.0911747	-0.049176	-0.0504486	0.187544			1.496	0.074275	0.0462758	0.0730023	0.0793657	0.107365
	1.497	0.0182766	0.0526392	0.0768203	0.134091	0.188817			1.497	0.0475485	0.0386396	0.0271854	0.0539119	0.0831838			1.497	-0.119174	-0.0924474	-0.0466306	-0.0682663	0.191362			1.497	0.0959107	0.0730023	0.078093	0.0819111	0.103547
	1.498	0.0259127	0.0475485	0.0704569	0.150636	0.204089			1.498	0.0564573	0.0322762	0.0539119	0.0602754	0.0755476			1.498	-0.11281	-0.073357	-0.0466306	-0.0619029	0.193908			1.498	0.0908199	0.061548	0.0691842	0.0806384	0.0997288
	1.499	0.037367	0.0539119	0.0857292	0.148091	0.184999			1.499	0.0424577	0.041185	0.037367	0.0691842	0.0844565			1.499	-0.128083	-0.0962655	-0.0593575	-0.032631	0.188817			1.499	0.0819111	0.0475485	0.0882745	0.0831838	0.10991
	1.5	0.0233674	0.0475485	0.0691842	0.154454	0.202817			1.5	0.0424577	0.0271854	0.0424577	0.0526392	0.078093			1.5	-0.114083	-0.100084	-0.052994	-0.0517213	0.206635			1.5	0.0730023	0.0513665	0.0628207	0.0666388	0.0997288
	1.501	0.0322762	0.0653661	0.0895472	0.146818	0.200271			1.501	0.0424577	0.020822	0.0259127	0.0704569	0.0730023			1.501	-0.116628	-0.0886293	-0.0593575	-0.0428125	0.179908			1.501	0.0857292	0.0564573	0.0526392	0.0793657	0.10991
	1.502	0.0335489	0.05773	0.0768203	0.143	0.196453			1.502	0.0462758	0.0271854	0.041185	0.0526392	0.0793657			1.502	-0.131901	-0.0949928	-0.0593575	-0.0631755	0.196453			1.502	0.104819	0.0691842	0.0640934	0.0844565	0.094638
	1.503	0.0386396	0.0539119	0.074275	0.149364	0.202817			1.503	0.0475485	0.0284581	0.0475485	0.0513665	0.0755476			1.503	-0.119174	-0.0937201	-0.0606302	-0.0466306	0.19009			1.503	0.0793657	0.074275	0.0640934	0.0831838	0.10991
	1.504	0.0335489	0.05773	0.0806384	0.149364	0.201544			1.504	0.0526392	0.041185	0.0424577	0.0590027	0.0819111			1.504	-0.124265	-0.0809932	-0.052994	-0.0606302	0.212998			1.504	0.107365	0.0602754	0.0819111	0.0730023	0.107365
	1.505	0.0233674	0.0500939	0.0768203	0.148091	0.204089			1.505	0.0424577	0.020822	0.0360943	0.05773	0.0704569			1.505	-0.114083	-0.0937201	-0.0644482	-0.0631755	0.192635			1.505	0.0730023	0.0500939	0.0590027	0.0730023	0.125183
	1.506	0.0360943	0.0513665	0.0691842	0.150636	0.211725			1.506	0.0602754	0.0220947	0.0386396	0.0513665	0.078093			1.506	-0.130628	-0.105174	-0.0428125	-0.0568121	0.204089			1.506	0.0768203	0.0475485	0.0691842	0.0768203	0.104819
	1.507	0.0335489	0.0666388	0.0755476	0.153182	0.201544			1.507	0.0437304	0.041185	0.0500939	0.05773	0.0755476			1.507	-0.130628	-0.102629	-0.0619029	-0.0479033	0.196453			1.507	0.0768203	0.0628207	0.0602754	0.078093	0.108638
	1.508	0.0271854	0.0564573	0.0691842	0.159545	0.211725			1.508	0.0399123	0.0233674	0.0462758	0.05773	0.0793657			1.508	-0.119174	-0.100084	-0.0580848	-0.052994	0.202817			1.508	0.0920926	0.0564573	0.0831838	0.0844565	0.103547
	1.509	0.0360943	0.0500939	0.0717296	0.159545	0.206635			1.509	0.0691842	0.037367	0.0424577	0.0628207	0.0793657			1.509	-0.124265	-0.0835386	-0.0657209	-0.0568121	0.196453			1.509	0.0971834	0.0500939	0.0730023	0.0844565	0.0997288
	1.51	0.0220947	0.05773	0.0755476	0.155727	0.216816			1.51	0.0488212	0.0233674	0.0386396	0.0539119	0.0857292			1.51	-0.120447	-0.0937201	-0.0580848	-0.0619029	0.193908			1.51	0.0831838	0.061548	0.0691842	0.0793657	0.094638
	1.511	0.0182766	0.0666388	0.078093	0.140455	0.196453			1.511	0.0526392	0.0322762	0.0450031	0.05773	0.0704569			1.511	-0.11281	-0.089902	-0.0606302	-0.0555394	0.201544			1.511	0.0997288	0.061548	0.0717296	0.0870019	0.0959107
	1.512	0.0271854	0.0539119	0.0691842	0.157	0.206635			1.512	0.0437304	0.0437304	0.0284581	0.0500939	0.0793657			1.512	-0.129355	-0.110265	-0.0504486	-0.0555394	0.211725			1.512	0.0717296	0.0666388	0.0666388	0.0640934	0.0971834
	1.513	0.041185	0.0475485	0.078093	0.153182	0.206635			1.513	0.0322762	0.0310035	0.0386396	0.0666388	0.0793657			1.513	-0.134446	-0.089902	-0.0402671	-0.0466306	0.206635			1.513	0.0908199	0.061548	0.0691842	0.0819111	0.0882745
	1.514	0.0335489	0.0564573	0.0640934	0.150636	0.20918			1.514	0.0399123	0.0310035	0.0450031	0.0590027	0.078093			1.514	-0.124265	-0.0975382	-0.052994	-0.0402671	0.200271			1.514	0.0971834	0.05773	0.0628207	0.0844565	0.103547
	1.515	0.0233674	0.0526392	0.0691842	0.155727	0.196453			1.515	0.0488212	0.0399123	0.0386396	0.0526392	0.0844565			1.515	-0.131901	-0.0873566	-0.0504486	-0.0631755	0.193908			1.515	0.0882745	0.074275	0.0704569	0.0755476	0.102274
	1.516	0.0348216	0.05773	0.0640934	0.154454	0.202817			1.516	0.0539119	0.0271854	0.0437304	0.0679115	0.0640934			1.516	-0.120447	-0.0937201	-0.069539	-0.0644482	0.201544			1.516	0.0870019	0.0513665	0.061548	0.0857292	0.0857292
	1.517	0.0220947	0.0526392	0.0730023	0.154454	0.201544			1.517	0.0500939	0.0284581	0.0513665	0.0526392	0.0691842			1.517	-0.120447	-0.0988109	-0.0555394	-0.0555394	0.204089			1.517	0.0870019	0.0539119	0.0717296	0.0819111	0.0933653
	1.518	0.0322762	0.061548	0.0806384	0.154454	0.201544			1.518	0.0539119	0.0450031	0.041185	0.0590027	0.0755476			1.518	-0.135719	-0.0822659	-0.0619029	-0.0555394	0.198998			1.518	0.0882745	0.0640934	0.0602754	0.0793657	0.0831838
	1.519	0.0386396	0.05773	0.0691842	0.146818	0.196453			1.519	0.0424577	0.0157312	0.0348216	0.061548	0.078093			1.519	-0.131901	-0.0949928	-0.0504486	-0.0555394	0.186272			1.519	0.0882745	0.0564573	0.0640934	0.078093	0.101001
	1.52	0.0220947	0.041185	0.0717296	0.151909	0.197726			1.52	0.0399123	0.037367	0.0513665	0.0500939	0.05773			1.52	-0.117901	-0.0949928	-0.0453579	-0.0402671	0.20918			1.52	0.094638	0.0526392	0.0602754	0.0870019	0.0793657
	1.521	0.0310035	0.0640934	0.074275	0.157	0.207907			1.521	0.0590027	0.0246401	0.0284581	0.0551846	0.074275			1.521	-0.135719	-0.11281	-0.0517213	-0.0428125	0.198998			1.521	0.078093	0.0590027	0.0602754	0.0819111	0.0691842
	1.522	0.0322762	0.0602754	0.074275	0.141728	0.197726			1.522	0.0551846	0.0297308	0.0437304	0.0564573	0.0768203			1.522	-0.124265	-0.0937201	-0.0453579	-0.0479033	0.195181			1.522	0.0793657	0.0450031	0.0730023	0.0717296	0.0844565
	1.523	0.0348216	0.0475485	0.0768203	0.16209	0.197726			1.523	0.0437304	0.0450031	0.0297308	0.0437304	0.0768203			1.523	-0.130628	-0.103902	-0.0555394	-0.032631	0.198998			1.523	0.0793657	0.05773	0.074275	0.0806384	0.0640934
	1.524	0.0322762	0.05773	0.0844565	0.141728	0.204089			1.524	0.0348216	0.0310035	0.0462758	0.0691842	0.0755476			1.524	-0.130628	-0.0924474	-0.0580848	-0.0415398	0.195181			1.524	0.074275	0.074275	0.074275	0.0844565	0.0755476
	1.525	0.0322762	0.0602754	0.0730023	0.150636	0.197726			1.525	0.0399123	0.00936778	0.0297308	0.0730023	0.0691842			1.525	-0.12681	-0.0911747	-0.0644482	-0.0517213	0.216816			1.525	0.0933653	0.0564573	0.0704569	0.0908199	0.0793657
	1.526	0.0348216	0.041185	0.0717296	0.149364	0.215543			1.526	0.0475485	0.0322762	0.0399123	0.05773	0.0793657			1.526	-0.134446	-0.0937201	-0.0631755	-0.0555394	0.202817			1.526	0.0870019	0.0628207	0.0831838	0.0679115	0.0730023
	1.527	0.0310035	0.0564573	0.0755476	0.143	0.191362			1.527	0.0437304	0.0284581	0.0488212	0.0564573	0.0806384			1.527	-0.130628	-0.0886293	-0.0580848	-0.0504486	0.201544			1.527	0.0895472	0.0640934	0.0691842	0.0691842	0.0691842
	1.528	0.0386396	0.0551846	0.0831838	0.141728	0.181181			1.528	0.0500939	0.0437304	0.0424577	0.0602754	0.0730023			1.528	-0.114083	-0.0975382	-0.0631755	-0.0619029	0.210453			1.528	0.0768203	0.061548	0.0640934	0.0730023	0.037367
	1.529	0.0284581	0.0590027	0.0755476	0.139182	0.200271			1.529	0.0450031	0.0322762	0.037367	0.0564573	0.074275			1.529	-0.12681	-0.115356	-0.0682663	-0.0428125	0.197726			1.529	0.0831838	0.0679115	0.0666388	0.0882745	0.0322762
	1.53	0.0246401	0.0640934	0.0666388	0.150636	0.205362			1.53	0.0526392	0.0310035	0.0386396	0.0590027	0.0844565			1.53	-0.134446	-0.101356	-0.052994	-0.0428125	0.207907			1.53	0.094638	0.0475485	0.078093	0.0870019	0.0182766
	1.531	0.0310035	0.0526392	0.0882745	0.158273	0.201544			1.531	0.0450031	0.0310035	0.0526392	0.0640934	0.0704569			1.531	-0.128083	-0.0873566	-0.0619029	-0.0517213	0.198998			1.531	0.0959107	0.0564573	0.0704569	0.0831838	0.0131859
	1.532	0.0526392	0.0475485	0.0806384	0.150636	0.202817			1.532	0.0602754	0.0386396	0.0526392	0.0475485	0.0717296			1.532	-0.129355	-0.100084	-0.0580848	-0.0351764	0.196453			1.532	0.0819111	0.0526392	0.0768203	0.0857292	-0.0186314
	1.533	0.0322762	0.0475485	0.0590027	0.150636	0.193908			1.533	0.0386396	0.0284581	0.0297308	0.0755476	0.0844565			1.533	-0.114083	-0.0886293	-0.0504486	-0.0542667	0.212998			1.533	0.078093	0.0539119	0.0640934	0.0793657	-0.00463181
	1.534	0.0284581	0.0564573	0.0704569	0.145546	0.202817			1.534	0.0437304	0.0233674	0.0526392	0.0424577	0.061548			1.534	-0.106447	-0.103902	-0.0479033	-0.0389944	0.219362			1.534	0.0920926	0.05773	0.0717296	0.0717296	-0.0237222
	1.535	0.0322762	0.0526392	0.074275	0.146818	0.211725			1.535	0.05773	0.0246401	0.0348216	0.0539119	0.0691842			1.535	-0.143355	-0.106447	-0.052994	-0.0389944	0.206635			1.535	0.0806384	0.05773	0.0602754	0.0768203	-0.0415398
	1.536	0.0284581	0.0551846	0.0704569	0.149364	0.202817			1.536	0.0462758	0.0386396	0.0386396	0.0653661	0.0806384			1.536	-0.129355	-0.086084	-0.049176	-0.0746297	0.20918			1.536	0.0997288	0.0602754	0.0730023	0.0730023	-0.0708117
	1.537	0.0233674	0.0488212	0.0831838	0.137909	0.193908			1.537	0.0386396	0.0233674	0.0475485	0.0691842	0.0793657			1.537	-0.12681	-0.0975382	-0.0631755	-0.0682663	0.207907			1.537	0.104819	0.0488212	0.0590027	0.074275	-0.111538
	1.538	0.041185	0.0526392	0.0717296	0.149364	0.207907			1.538	0.0424577	0.0310035	0.0462758	0.0564573	0.078093			1.538	-0.121719	-0.0962655	-0.0555394	-0.0619029	0.220634			1.538	0.0768203	0.05773	0.061548	0.05773	-0.0771751
	1.539	0.0297308	0.0462758	0.061548	0.139182	0.201544			1.539	0.0475485	0.0284581	0.0310035	0.0666388	0.0704569			1.539	-0.11281	-0.0924474	-0.0504486	-0.0428125	0.201544			1.539	0.0844565	0.0564573	0.0679115	0.0730023	-0.0988109
	1.54	0.0335489	0.0602754	0.0679115	0.153182	0.20918			1.54	0.037367	0.0322762	0.0437304	0.05773	0.0857292			1.54	-0.14081	-0.108992	-0.0593575	-0.052994	0.216816			1.54	0.0806384	0.061548	0.074275	0.078093	-0.0924474
	1.541	0.0233674	0.0679115	0.0640934	0.139182	0.20918			1.541	0.0488212	0.0386396	0.05773	0.0437304	0.0806384			1.541	-0.122992	-0.102629	-0.0580848	-0.049176	0.210453			1.541	0.0908199	0.0500939	0.05773	0.0691842	-0.049176
	1.542	0.0297308	0.0500939	0.0691842	0.132819	0.206635			1.542	0.0386396	0.0297308	0.0462758	0.05773	0.074275			1.542	-0.111538	-0.0835386	-0.052994	-0.0580848	0.200271			1.542	0.0933653	0.0564573	0.0755476	0.0704569	0.00936778
	1.543	0.0322762	0.0564573	0.0666388	0.150636	0.206635			1.543	0.0564573	0.0424577	0.041185	0.0704569	0.0704569			1.543	-0.135719	-0.0835386	-0.0606302	-0.0351764	0.214271			1.543	0.0870019	0.0500939	0.0666388	0.0895472	0.0462758
	1.544	0.0259127	0.0437304	0.0564573	0.144273	0.202817			1.544	0.0424577	0.0284581	0.0475485	0.0488212	0.0806384			1.544	-0.120447	-0.106447	-0.0593575	-0.052994	0.224452			1.544	0.078093	0.0628207	0.0691842	0.0730023	0.078093
	1.545	0.020822	0.0526392	0.0590027	0.153182	0.201544			1.545	0.0475485	0.0399123	0.0424577	0.05773	0.078093			1.545	-0.14081	-0.110265	-0.049176	-0.0593575	0.216816			1.545	0.0908199	0.0590027	0.0628207	0.0806384	0.102274
	1.546	0.0360943	0.0488212	0.0526392	0.144273	0.201544			1.546	0.0526392	0.0246401	0.0500939	0.0564573	0.0730023			1.546	-0.121719	-0.0886293	-0.0631755	-0.0631755	0.212998			1.546	0.0831838	0.05773	0.0679115	0.0806384	0.120092
	1.547	0.0386396	0.0551846	0.0602754	0.149364	0.206635			1.547	0.0310035	0.0297308	0.041185	0.074275	0.0768203			1.547	-0.133174	-0.105174	-0.0377217	-0.0542667	0.22318			1.547	0.0806384	0.074275	0.0679115	0.0730023	0.140455
	1.548	0.0322762	0.0704569	0.05773	0.137909	0.198998			1.548	0.0246401	0.041185	0.0450031	0.0500939	0.0730023			1.548	-0.120447	-0.086084	-0.0517213	-0.0568121	0.220634			1.548	0.0908199	0.0602754	0.0793657	0.0857292	0.121365
	1.549	0.0335489	0.05773	0.05773	0.145546	0.195181			1.549	0.0386396	0.0360943	0.0513665	0.074275	0.0793657			1.549	-0.128083	-0.0822659	-0.0580848	-0.0402671	0.211725			1.549	0.0844565	0.0513665	0.0564573	0.0679115	0.111183
	1.55	0.0399123	0.0513665	0.0526392	0.146818	0.211725			1.55	0.0437304	0.0157312	0.0475485	0.0628207	0.0870019			1.55	-0.124265	-0.0911747	-0.0682663	-0.052994	0.211725			1.55	0.0870019	0.0628207	0.0730023	0.0730023	0.125183
	1.551	0.0360943	0.0539119	0.0628207	0.145546	0.210453			1.551	0.0437304	0.0322762	0.0539119	0.0564573	0.0730023			1.551	-0.117901	-0.102629	-0.0479033	-0.0415398	0.226998			1.551	0.0895472	0.0500939	0.0755476	0.0755476	0.113728
	1.552	0.0386396	0.0666388	0.0666388	0.149364	0.195181			1.552	0.0450031	0.0284581	0.0399123	0.0666388	0.0806384			1.552	-0.12681	-0.089902	-0.0517213	-0.0542667	0.221907			1.552	0.0768203	0.0450031	0.0831838	0.0806384	0.12391
	1.553	0.037367	0.0640934	0.0551846	0.145546	0.202817			1.553	0.0399123	0.0284581	0.0450031	0.0551846	0.0933653			1.553	-0.128083	-0.108992	-0.049176	-0.0669936	0.225725			1.553	0.102274	0.0602754	0.0602754	0.0806384	0.101001
	1.554	0.0348216	0.0488212	0.0590027	0.145546	0.215543			1.554	0.0437304	0.0360943	0.0437304	0.061548	0.0691842			1.554	-0.12681	-0.0797205	-0.0555394	-0.0542667	0.226998			1.554	0.0882745	0.0475485	0.0704569	0.0768203	0.10991
	1.555	0.0335489	0.0539119	0.0564573	0.143	0.200271			1.555	0.037367	0.0246401	0.0386396	0.0628207	0.0933653			1.555	-0.115356	-0.0835386	-0.0542667	-0.0568121	0.215543			1.555	0.0793657	0.0539119	0.0691842	0.0666388	0.129001
	1.556	0.020822	0.0590027	0.00809509	0.144273	0.165909			1.556	0.037367	0.0424577	0.0386396	0.0602754	0.0768203			1.556	-0.135719	-0.0886293	-0.0568121	-0.0631755	0.215543			1.556	0.0831838	0.0602754	0.0691842	0.0870019	0.126455
	1.557	0.0271854	0.0551846	-0.0249948	0.137909	0.141728			1.557	0.0386396	0.037367	0.0424577	0.0730023	0.074275			1.557	-0.115356	-0.122992	-0.073357	-0.0428125	0.207907			1.557	0.0882745	0.074275	0.0730023	0.101001	0.118819
	1.558	0.0399123	0.0653661	-0.036449	0.137909	0.120092			1.558	0.0424577	0.0386396	0.0526392	0.0691842	0.0679115			1.558	-0.124265	-0.0937201	-0.0580848	-0.0542667	0.230816			1.558	0.0882745	0.0666388	0.0564573	0.0691842	0.134091
	1.559	0.0284581	0.0526392	-0.0300856	0.135364	0.117546			1.559	0.037367	0.00936778	0.037367	0.0602754	0.0666388			1.559	-0.119174	-0.0937201	-0.0466306	-0.0631755	0.233361			1.559	0.0895472	0.0539119	0.0882745	0.0691842	0.103547
	1.56	0.037367	0.0564573	-0.0059045	0.144273	0.160818			1.56	0.0437304	0.0310035	0.0475485	0.061548	0.0959107			1.56	-0.120447	-0.086084	-0.0453579	-0.052994	0.22318			1.56	0.0895472	0.061548	0.0768203	0.074275	0.112456
	1.561	0.0297308	0.0602754	0.037367	0.143	0.201544			1.561	0.0284581	0.0335489	0.0399123	0.0551846	0.0806384			1.561	-0.115356	-0.0835386	-0.0542667	-0.0440852	0.22827			1.561	0.0844565	0.0462758	0.05773	0.0653661	0.126455
	1.562	0.0297308	0.0526392	0.05773	0.146818	0.204089			1.562	0.0551846	0.0297308	0.0602754	0.0590027	0.0768203			1.562	-0.129355	-0.0937201	-0.0555394	-0.052994	0.232089			1.562	0.094638	0.05773	0.0831838	0.074275	0.121365
	1.563	0.0322762	0.05773	0.0691842	0.145546	0.221907			1.563	0.0500939	0.0220947	0.0539119	0.0500939	0.078093			1.563	-0.130628	-0.103902	-0.0542667	-0.0682663	0.206635			1.563	0.0768203	0.0513665	0.0628207	0.0793657	0.125183
	1.564	0.0220947	0.0450031	0.0793657	0.139182	0.24227			1.564	0.0488212	0.0386396	0.0539119	0.0704569	0.0717296			1.564	-0.124265	-0.0873566	-0.0479033	-0.0644482	0.235906			1.564	0.0844565	0.0526392	0.0679115	0.0768203	0.108638
	1.565	0.0259127	0.0513665	0.0691842	0.148091	0.229543			1.565	0.041185	0.0424577	0.0399123	0.0691842	0.0755476			1.565	-0.117901	-0.073357	-0.0568121	-0.0555394	0.230816			1.565	0.0768203	0.0539119	0.0640934	0.0819111	0.113728
	1.566	0.0220947	0.05773	0.0679115	0.141728	0.244815			1.566	0.041185	0.0284581	0.0399123	0.0500939	0.0882745			1.566	-0.12681	-0.0886293	-0.0479033	-0.0415398	0.215543			1.566	0.0870019	0.074275	0.061548	0.078093	0.094638
	1.567	0.0348216	0.05773	0.0806384	0.139182	0.244815			1.567	0.0488212	0.0386396	0.0488212	0.0513665	0.0691842			1.567	-0.116628	-0.0924474	-0.0631755	-0.049176	0.226998			1.567	0.094638	0.0640934	0.078093	0.0844565	0.0895472
	1.568	0.0220947	0.0462758	0.0679115	0.132819	0.221907			1.568	0.0424577	0.0284581	0.0399123	0.0653661	0.078093			1.568	-0.115356	-0.100084	-0.0593575	-0.0415398	0.22827			1.568	0.0831838	0.0704569	0.0691842	0.0768203	0.0908199
	1.569	0.0360943	0.0526392	0.0704569	0.103547	0.232089			1.569	0.0424577	0.0297308	0.0450031	0.05773	0.0755476			1.569	-0.125537	-0.0949928	-0.069539	-0.0504486	0.226998			1.569	0.0831838	0.0513665	0.0640934	0.074275	0.0882745
	1.57	0.0259127	0.0590027	0.0730023	0.0793657	0.238452			1.57	0.0399123	0.0399123	0.0437304	0.074275	0.094638			1.57	-0.114083	-0.103902	-0.0351764	-0.0644482	0.220634			1.57	0.0882745	0.0640934	0.0755476	0.0640934	0.0959107
	1.571	0.0322762	0.041185	0.05773	0.0590027	0.238452			1.571	0.0424577	0.0424577	0.0399123	0.0386396	0.0908199			1.571	-0.130628	-0.089902	-0.0428125	-0.0453579	0.225725			1.571	0.0844565	0.05773	0.0590027	0.0628207	0.0755476
	1.572	0.0284581	0.0462758	0.0564573	0.0653661	0.234634			1.572	0.0360943	0.0246401	0.041185	0.0551846	0.0793657			1.572	-0.120447	-0.0886293	-0.0479033	-0.049176	0.225725			1.572	0.0831838	0.0450031	0.0640934	0.0666388	0.0882745
	1.573	0.0386396	0.0386396	0.0730023	0.0933653	0.243543			1.573	0.0488212	0.0284581	0.0488212	0.0653661	0.0844565			1.573	-0.129355	-0.0988109	-0.0644482	-0.0517213	0.214271			1.573	0.0768203	0.061548	0.0755476	0.0539119	0.0819111
	1.574	0.0348216	0.0462758	0.0539119	0.125183	0.225725			1.574	0.0475485	0.0310035	0.0437304	0.0640934	0.0768203			1.574	-0.115356	-0.086084	-0.0644482	-0.0453579	0.226998			1.574	0.10991	0.0437304	0.0730023	0.0679115	0.0933653
	1.575	0.0386396	0.0335489	0.061548	0.140455	0.226998			1.575	0.0500939	0.0462758	0.0539119	0.0640934	0.0806384			1.575	-0.125537	-0.0988109	-0.032631	-0.0479033	0.232089			1.575	0.0793657	0.0602754	0.0819111	0.0526392	0.111183
	1.576	0.0399123	0.0551846	0.0590027	0.154454	0.230816			1.576	0.0386396	0.0399123	0.0526392	0.0590027	0.0895472			1.576	-0.136991	-0.0835386	-0.073357	-0.0440852	0.206635			1.576	0.0844565	0.0590027	0.0564573	0.0513665	0.112456
	1.577	0.0297308	0.041185	0.074275	0.169727	0.232089			1.577	0.0462758	0.0284581	0.0399123	0.0437304	0.0806384			1.577	-0.111538	-0.0949928	-0.0428125	-0.0504486	0.216816			1.577	0.0793657	0.0564573	0.0755476	0.0386396	0.127728
	1.578	0.0271854	0.037367	0.0717296	0.167181	0.243543			1.578	0.0564573	0.0322762	0.0424577	0.0590027	0.0704569			1.578	-0.129355	-0.0759024	-0.0606302	-0.0402671	0.218089			1.578	0.0870019	0.0590027	0.0640934	0.0551846	0.121365
	1.579	0.0284581	0.0437304	0.0602754	0.155727	0.233361			1.579	0.0348216	0.0220947	0.0475485	0.0730023	0.0768203			1.579	-0.117901	-0.0911747	-0.0428125	-0.0504486	0.226998			1.579	0.0857292	0.0539119	0.074275	0.0475485	0.111183
	1.58	0.0284581	0.0348216	0.0806384	0.143	0.24227			1.58	0.0424577	0.0450031	0.0500939	0.061548	0.0679115			1.58	-0.12681	-0.0873566	-0.0580848	-0.052994	0.232089			1.58	0.0730023	0.0691842	0.0768203	0.0730023	0.117546
	1.581	0.0360943	0.0259127	0.0653661	0.154454	0.24227			1.581	0.0475485	0.0310035	0.0475485	0.0539119	0.074275			1.581	-0.119174	-0.102629	-0.0580848	-0.0389944	0.215543			1.581	0.0920926	0.05773	0.0793657	0.0691842	0.122637
	1.582	0.0246401	0.0322762	0.0628207	0.149364	0.24227			1.582	0.0399123	0.0284581	0.0322762	0.0679115	0.0844565			1.582	-0.120447	-0.0937201	-0.0580848	-0.0479033	0.221907			1.582	0.0793657	0.0602754	0.0691842	0.0488212	0.129001
	1.583	0.0220947	0.0450031	0.0679115	0.144273	0.22827			1.583	0.0399123	0.0284581	0.0437304	0.0488212	0.0882745			1.583	-0.129355	-0.0848113	-0.0440852	-0.069539	0.230816			1.583	0.0831838	0.0539119	0.0628207	0.0526392	0.118819
	1.584	0.0284581	0.0297308	0.0730023	0.148091	0.243543			1.584	0.0462758	0.0335489	0.0475485	0.0590027	0.0768203			1.584	-0.125537	-0.089902	-0.0479033	-0.0389944	0.221907			1.584	0.0908199	0.0475485	0.0653661	0.061548	0.118819
	1.585	0.0246401	0.0399123	0.078093	0.150636	0.249906			1.585	0.037367	0.0386396	0.037367	0.05773	0.0831838			1.585	-0.122992	-0.0848113	-0.0580848	-0.0466306	0.220634			1.585	0.0857292	0.0462758	0.0590027	0.0564573	0.130273
	1.586	0.0348216	0.0386396	0.0666388	0.150636	0.22827			1.586	0.0475485	0.0284581	0.0488212	0.05773	0.0831838			1.586	-0.116628	-0.105174	-0.0631755	-0.052994	0.218089			1.586	0.0870019	0.0564573	0.0768203	0.0475485	0.120092
	1.587	0.0386396	0.0539119	0.0704569	0.149364	0.229543			1.587	0.0450031	0.0335489	0.0424577	0.0590027	0.0717296			1.587	-0.116628	-0.105174	-0.0517213	-0.0453579	0.22318			1.587	0.0857292	0.0653661	0.0768203	0.0526392	0.108638
	1.588	0.0195493	0.0500939	0.0513665	0.134091	0.24227			1.588	0.0450031	0.0246401	0.0590027	0.0679115	0.0895472			1.588	-0.122992	-0.0988109	-0.052994	-0.0644482	0.221907			1.588	0.0908199	0.0539119	0.0640934	0.0653661	0.129001
	1.589	0.0348216	0.0488212	0.0590027	0.150636	0.221907			1.589	0.0462758	0.041185	0.0462758	0.0730023	0.0844565			1.589	-0.134446	-0.0911747	-0.0389944	-0.052994	0.20918			1.589	0.0831838	0.0590027	0.0793657	0.074275	0.115001
	1.59	0.0220947	0.0322762	0.0500939	0.146818	0.229543			1.59	0.0424577	0.041185	0.041185	0.0462758	0.0844565			1.59	-0.130628	-0.100084	-0.052994	-0.0377217	0.205362			1.59	0.0920926	0.0602754	0.0793657	0.0844565	0.112456
	1.591	0.0310035	0.0590027	0.0488212	0.154454	0.224452			1.591	0.0500939	0.0322762	0.0399123	0.0640934	0.0768203			1.591	-0.135719	-0.089902	-0.0504486	-0.0428125	0.216816			1.591	0.0806384	0.0628207	0.074275	0.0679115	0.136637
	1.592	0.0322762	0.0475485	0.0602754	0.158273	0.237179			1.592	0.0462758	0.0335489	0.0424577	0.0488212	0.094638			1.592	-0.124265	-0.100084	-0.0568121	-0.0428125	0.224452			1.592	0.0908199	0.0666388	0.0768203	0.0819111	0.116274
	1.593	0.0360943	0.0526392	0.05773	0.165909	0.243543			1.593	0.0488212	0.0284581	0.05773	0.0590027	0.0882745			1.593	-0.125537	-0.0886293	-0.0720844	-0.049176	0.207907			1.593	0.0730023	0.0437304	0.0640934	0.0730023	0.117546
	1.594	0.0360943	0.05773	0.0666388	0.155727	0.237179			1.594	0.0475485	0.0335489	0.0360943	0.0602754	0.0691842			1.594	-0.115356	-0.0848113	-0.0555394	-0.0542667	0.221907			1.594	0.0819111	0.0730023	0.0602754	0.0640934	0.127728
	1.595	0.0437304	0.0475485	0.05773	0.16209	0.246088			1.595	0.0437304	0.0335489	0.0539119	0.0539119	0.0755476			1.595	-0.115356	-0.0784478	-0.0657209	-0.0542667	0.206635			1.595	0.0793657	0.0564573	0.078093	0.0640934	0.103547
	1.596	0.0348216	0.0602754	0.0653661	0.163363	0.248633			1.596	0.0310035	0.0360943	0.0462758	0.0628207	0.0819111			1.596	-0.117901	-0.103902	-0.0542667	-0.0377217	0.220634			1.596	0.0857292	0.0602754	0.0704569	0.0653661	0.127728
	1.597	0.0360943	0.0462758	0.0768203	0.163363	0.235906			1.597	0.041185	0.0360943	0.0437304	0.0564573	0.0857292			1.597	-0.1459	-0.103902	-0.049176	-0.0542667	0.195181			1.597	0.0831838	0.0386396	0.0691842	0.0704569	0.108638
	1.598	0.0335489	0.0488212	0.0717296	0.153182	0.234634			1.598	0.0399123	0.0233674	0.041185	0.0488212	0.0602754			1.598	-0.135719	-0.105174	-0.0619029	-0.0644482	0.19009			1.598	0.0806384	0.0679115	0.0551846	0.0691842	0.108638
	1.599	0.0271854	0.0488212	0.0628207	0.145546	0.252451			1.599	0.0450031	0.0284581	0.0488212	0.0564573	0.0831838			1.599	-0.129355	-0.0937201	-0.0682663	-0.0580848	0.201544			1.599	0.0895472	0.0564573	0.0653661	0.078093	0.104819
	1.6	0.0348216	0.0475485	0.0691842	0.148091	0.232089			1.6	0.0450031	0.0246401	0.0424577	0.0590027	0.0870019			1.6	-0.134446	-0.0911747	-0.0669936	-0.0580848	0.19009			1.6	0.0793657	0.061548	0.0590027	0.078093	0.101001
	1.601	0.0246401	0.0462758	0.0640934	0.134091	0.229543			1.601	0.0437304	0.037367	0.0437304	0.0590027	0.0933653			1.601	-0.125537	-0.0924474	-0.0402671	-0.0759024	0.192635			1.601	0.0908199	0.0564573	0.0640934	0.0653661	0.107365
	1.602	0.0348216	0.0437304	0.0500939	0.134091	0.221907			1.602	0.0437304	0.0233674	0.0500939	0.0475485	0.0844565			1.602	-0.129355	-0.0988109	-0.0784478	-0.0631755	0.178636			1.602	0.074275	0.0590027	0.0628207	0.0793657	0.108638
	1.603	0.0195493	0.0602754	0.0679115	0.149364	0.225725			1.603	0.0475485	0.037367	0.0246401	0.0513665	0.074275			1.603	-0.139537	-0.0937201	-0.0644482	-0.073357	0.169727			1.603	0.0831838	0.0526392	0.0704569	0.0704569	0.0831838
	1.604	0.0322762	0.0513665	0.0551846	0.127728	0.219362			1.604	0.0437304	0.0297308	0.0450031	0.0462758	0.0793657			1.604	-0.122992	-0.100084	-0.0771751	-0.0631755	0.141728			1.604	0.0997288	0.0628207	0.074275	0.0870019	0.103547
	1.605	0.0360943	0.0424577	0.0704569	0.146818	0.20918			1.605	0.0386396	0.0348216	0.0322762	0.0602754	0.078093			1.605	-0.130628	-0.0988109	-0.052994	-0.0771751	0.122637			1.605	0.0844565	0.0551846	0.0628207	0.103547	0.104819
	1.606	0.0335489	0.0590027	0.0564573	0.131546	0.215543			1.606	0.0526392	0.0322762	0.0424577	0.0551846	0.0691842			1.606	-0.130628	-0.0937201	-0.073357	-0.086084	0.107365			1.606	0.0704569	0.061548	0.0691842	0.0857292	0.102274
	1.607	0.0322762	0.05773	0.0628207	0.131546	0.200271			1.607	0.0526392	0.0284581	0.0424577	0.0539119	0.0920926			1.607	-0.119174	-0.0988109	-0.0720844	-0.0759024	0.118819			1.607	0.0844565	0.0551846	0.0768203	0.0768203	0.104819
	1.608	0.0322762	0.0437304	0.0704569	0.143	0.197726			1.608	0.0526392	0.0259127	0.0424577	0.0462758	0.0691842			1.608	-0.147173	-0.106447	-0.0784478	-0.0848113	0.0717296			1.608	0.104819	0.061548	0.0819111	0.0768203	0.0971834
	1.609	0.0310035	0.0488212	0.0679115	0.132819	0.19009			1.609	0.0539119	0.0284581	0.0462758	0.0475485	0.0704569			1.609	-0.120447	-0.101356	-0.0746297	-0.0835386	0.0666388			1.609	0.0857292	0.0628207	0.0666388	0.0679115	0.0971834
	1.61	0.0310035	0.041185	0.0730023	0.148091	0.188817			1.61	0.0360943	0.0297308	0.0322762	0.0360943	0.074275			1.61	-0.135719	-0.105174	-0.0746297	-0.089902	0.037367			1.61	0.0857292	0.074275	0.0679115	0.0755476	0.0819111
	1.611	0.0271854	0.0539119	0.0640934	0.140455	0.179908			1.611	0.0513665	0.0360943	0.0500939	0.0450031	0.0691842			1.611	-0.133174	-0.0835386	-0.0911747	-0.0962655	0.0182766			1.611	0.0793657	0.074275	0.0730023	0.0793657	0.0870019
	1.612	0.0297308	0.0335489	0.0666388	0.135364	0.167181			1.612	0.0488212	0.0284581	0.0500939	0.0424577	0.0768203			1.612	-0.136991	-0.0911747	-0.0988109	-0.0988109	-0.00844988			1.612	0.0768203	0.0691842	0.0640934	0.0730023	0.0870019
	1.613	0.0322762	0.0513665	0.0717296	0.145546	0.165909			1.613	0.0462758	0.0259127	0.0475485	0.0310035	0.0666388			1.613	-0.121719	-0.0949928	-0.0924474	-0.0937201	-0.0275402			1.613	0.0730023	0.0857292	0.061548	0.0628207	0.101001
	1.614	0.020822	0.041185	0.0653661	0.135364	0.16209			1.614	0.0297308	0.0271854	0.0386396	0.0424577	0.074275			1.614	-0.130628	-0.106447	-0.0911747	-0.0937201	-0.0440852			1.614	0.0793657	0.0691842	0.0730023	0.0691842	0.0997288
	1.615	0.0284581	0.0399123	0.0564573	0.125183	0.140455			1.615	0.0526392	0.0322762	0.0386396	0.020822	0.0640934			1.615	-0.133174	-0.110265	-0.0962655	-0.108992	-0.0504486			1.615	0.0959107	0.0768203	0.0704569	0.0691842	0.108638
	1.616	0.0220947	0.0335489	0.0653661	0.127728	0.151909			1.616	0.0475485	0.0322762	0.0450031	0.00554971	0.0755476			1.616	-0.130628	-0.0949928	-0.115356	-0.11281	-0.0809932			1.616	0.0895472	0.0870019	0.0717296	0.0691842	0.120092
	1.617	0.0259127	0.0462758	0.0551846	0.131546	0.131546			1.617	0.0360943	0.0360943	0.0310035	0.0195493	0.0831838			1.617	-0.139537	-0.105174	-0.119174	-0.108992	-0.12681			1.617	0.0882745	0.0679115	0.0551846	0.0730023	0.107365
	1.618	0.0322762	0.0488212	0.0640934	0.125183	0.121365			1.618	0.041185	0.0322762	0.0539119	0.0182766	0.0755476			1.618	-0.128083	-0.0835386	-0.103902	-0.0949928	-0.139537			1.618	0.0793657	0.05773	0.05773	0.0755476	0.10991
	1.619	0.0284581	0.0462758	0.0704569	0.113728	0.116274			1.619	0.0450031	0.0246401	0.0246401	0.0220947	0.0691842			1.619	-0.133174	-0.0949928	-0.106447	-0.11281	-0.14081			1.619	0.0895472	0.0640934	0.05773	0.0755476	0.0959107
	1.62	0.0322762	0.0462758	0.0590027	0.116274	0.121365			1.62	0.0450031	0.0335489	0.0424577	0.0322762	0.0691842			1.62	-0.114083	-0.106447	-0.115356	-0.119174	-0.196808			1.62	0.102274	0.05773	0.0475485	0.0704569	0.113728
	1.621	0.0284581	0.0424577	0.0679115	0.113728	0.102274			1.621	0.0500939	0.0360943	0.0348216	0.0348216	0.0793657			1.621	-0.148446	-0.102629	-0.114083	-0.110265	-0.229898			1.621	0.0831838	0.0488212	0.0755476	0.0768203	0.113728
	1.622	0.0246401	0.0462758	0.0564573	0.125183	0.0908199			1.622	0.0526392	0.0310035	0.0424577	0.0310035	0.0819111			1.622	-0.125537	-0.117901	-0.121719	-0.125537	-0.238807			1.622	0.0679115	0.0730023	0.0704569	0.078093	0.104819
	1.623	0.0246401	0.0450031	0.0653661	0.108638	0.0704569			1.623	0.041185	0.0271854	0.0462758	0.0310035	0.0704569			1.623	-0.117901	-0.0962655	-0.117901	-0.122992	-0.265533			1.623	0.0870019	0.05773	0.0526392	0.0679115	0.112456
	1.624	0.0259127	0.0399123	0.0539119	0.115001	0.0920926			1.624	0.0539119	0.0386396	0.0348216	0.00554971	0.0640934			1.624	-0.130628	-0.0949928	-0.125537	-0.130628	-0.29735			1.624	0.0857292	0.0691842	0.0717296	0.0564573	0.107365
	1.625	0.0386396	0.0475485	0.0513665	0.127728	0.0691842			1.625	0.041185	0.020822	0.0297308	-0.0440852	0.0666388			1.625	-0.129355	-0.116628	-0.129355	-0.135719	-0.33044			1.625	0.0959107	0.0513665	0.0488212	0.0959107	0.0959107
	1.626	0.037367	0.0475485	0.0679115	0.102274	0.0768203			1.626	0.0513665	0.0284581	0.037367	-0.0339037	0.0602754			1.626	-0.124265	-0.0975382	-0.125537	-0.164991	-0.350803			1.626	0.078093	0.0513665	0.0640934	0.0831838	0.112456
	1.627	0.0335489	0.0424577	0.0564573	0.108638	0.0564573			1.627	0.0526392	0.0297308	0.0360943	-0.00972257	0.0730023			1.627	-0.128083	-0.105174	-0.116628	-0.167536	-0.376257			1.627	0.0959107	0.0691842	0.0653661	0.0628207	0.104819
	1.628	0.0424577	0.0475485	0.0539119	0.0997288	0.0437304			1.628	0.0322762	0.0284581	0.0360943	0.0195493	0.0831838			1.628	-0.119174	-0.0975382	-0.134446	-0.191717	-0.405529			1.628	0.0870019	0.0590027	0.0666388	0.0806384	0.130273
	1.629	0.0157312	0.041185	0.0513665	0.0984561	0.0322762			1.629	0.0500939	0.0233674	0.0462758	0.0500939	0.0653661			1.629	-0.133174	-0.106447	-0.117901	-0.199353	-0.441164			1.629	0.0908199	0.0462758	0.0640934	0.0640934	0.0882745
	1.63	0.0297308	0.0310035	0.0539119	0.10991	0.0259127			1.63	0.0500939	0.0246401	0.0335489	0.0450031	0.0640934			1.63	-0.14081	-0.101356	-0.134446	-0.208262	-0.461527			1.63	0.0730023	0.0564573	0.0488212	0.0704569	0.117546
	1.631	0.0220947	0.0399123	0.0564573	0.0908199	0.00809509			1.631	0.0450031	0.0335489	0.0386396	0.0717296	0.0628207			1.631	-0.115356	-0.120447	-0.116628	-0.213353	-0.472982			1.631	0.0870019	0.0590027	0.078093	0.0793657	0.103547
	1.632	0.0233674	0.0462758	0.0564573	0.0997288	0.000458949			1.632	0.0462758	0.0310035	0.0335489	0.0590027	0.0628207			1.632	-0.116628	-0.106447	-0.130628	-0.238807	-0.499708			1.632	0.0882745	0.0551846	0.0704569	0.0806384	0.0933653
	1.633	0.0310035	0.0360943	0.0730023	0.0793657	-0.00208643			1.633	0.0437304	0.037367	0.0271854	0.0679115	0.0628207			1.633	-0.131901	-0.105174	-0.129355	-0.223534	-0.532798			1.633	0.0882745	0.0628207	0.061548	0.0819111	0.117546
	1.634	0.020822	0.0348216	0.0704569	0.0768203	-0.0122679			1.634	0.041185	0.0233674	0.0322762	0.0717296	0.0640934			1.634	-0.120447	-0.102629	-0.115356	-0.237534	-0.534071			1.634	0.0844565	0.0551846	0.0500939	0.074275	0.10991
	1.635	0.0220947	0.020822	0.0717296	0.107365	-0.0237222			1.635	0.0437304	0.0322762	0.0271854	0.0628207	0.0564573			1.635	-0.122992	-0.114083	-0.119174	-0.243897	-0.554434			1.635	0.0971834	0.0564573	0.0500939	0.0679115	0.10991
	1.636	0.0220947	0.041185	0.074275	0.0895472	-0.0300856			1.636	0.0437304	0.0195493	0.0437304	0.0679115	0.0602754			1.636	-0.143355	-0.108992	-0.119174	-0.247716	-0.574797			1.636	0.0844565	0.061548	0.0755476	0.0704569	0.117546
	1.637	0.0322762	0.0399123	0.0640934	0.0666388	-0.0339037			1.637	0.0386396	0.041185	0.037367	0.0424577	0.0666388			1.637	-0.134446	-0.125537	-0.114083	-0.240079	-0.579888			1.637	0.0908199	0.0424577	0.0730023	0.0691842	0.106092
	1.638	0.0246401	0.0322762	0.0513665	0.0539119	-0.0389944			1.638	0.0310035	0.0259127	0.0399123	0.0462758	0.0590027			1.638	-0.121719	-0.133174	-0.114083	-0.231171	-0.609159			1.638	0.0882745	0.0386396	0.0539119	0.0628207	0.108638
	1.639	0.0322762	0.037367	0.0590027	0.05773	-0.0377217			1.639	0.0539119	0.0259127	0.0360943	0.0450031	0.0679115			1.639	-0.128083	-0.115356	-0.115356	-0.238807	-0.621886			1.639	0.0793657	0.0640934	0.0526392	0.0640934	0.111183
	1.64	0.0144585	0.0348216	0.061548	0.0386396	-0.0428125			1.64	0.0462758	0.0310035	0.0386396	0.0170039	0.0628207			1.64	-0.133174	-0.119174	-0.0975382	-0.250261	-0.626977			1.64	0.0819111	0.0462758	0.0488212	0.0679115	0.0882745
	1.641	0.0271854	0.0450031	0.0551846	0.0335489	-0.0389944			1.641	0.0475485	0.0220947	0.0348216	0.0119132	0.0513665			1.641	-0.129355	-0.111538	-0.0988109	-0.254079	-0.630795			1.641	0.0819111	0.0488212	0.0628207	0.061548	0.0908199
	1.642	0.0297308	0.0310035	0.0462758	0.0220947	-0.052994			1.642	0.0360943	0.0386396	0.0348216	0.00300433	0.0602754			1.642	-0.110265	-0.122992	-0.0949928	-0.240079	-0.611705			1.642	0.0857292	0.061548	0.0513665	0.0793657	0.101001
	1.643	0.0360943	0.0335489	0.0564573	0.0322762	-0.0479033			1.643	0.0360943	0.0399123	0.0424577	0.0106405	0.05773			1.643	-0.133174	-0.105174	-0.102629	-0.228625	-0.590069			1.643	0.0857292	0.0513665	0.0666388	0.0691842	0.102274
	1.644	0.0386396	0.0348216	0.0488212	0.0182766	-0.036449			1.644	0.041185	0.0246401	0.0462758	-0.00844988	0.0666388			1.644	-0.121719	-0.124265	-0.0988109	-0.22608	-0.596433			1.644	0.0844565	0.0602754	0.05773	0.0602754	0.106092
	1.645	0.0360943	0.0462758	0.0590027	0.0119132	-0.049176			1.645	0.0462758	0.0271854	0.0220947	-0.00208643	0.0717296			1.645	-0.130628	-0.106447	-0.0886293	-0.204444	-0.587524			1.645	0.0959107	0.0539119	0.0539119	0.0806384	0.104819
	1.646	0.0386396	0.0386396	0.0488212	0.0157312	-0.0453579			1.646	0.0424577	0.0297308	0.0475485	-0.00208643	0.0628207			1.646	-0.108992	-0.115356	-0.086084	-0.195535	-0.554434			1.646	0.0819111	0.0602754	0.05773	0.0679115	0.0857292
	1.647	0.0220947	0.0386396	0.0679115	0.0106405	-0.0428125			1.647	0.0475485	0.0170039	0.0437304	-0.0351764	0.0564573			1.647	-0.142082	-0.124265	-0.0962655	-0.181536	-0.523889			1.647	0.0959107	0.0475485	0.0640934	0.0730023	0.0971834
	1.648	0.0297308	0.0322762	0.061548	0.020822	-0.032631			1.648	0.0424577	0.020822	0.0335489	-0.0224495	0.0500939			1.648	-0.124265	-0.110265	-0.0873566	-0.162445	-0.507344			1.648	0.078093	0.0564573	0.05773	0.0539119	0.103547
	1.649	0.0310035	0.0348216	0.0755476	0.0182766	-0.0415398			1.649	0.0437304	0.0259127	0.0386396	-0.00208643	0.05773			1.649	-0.116628	-0.115356	-0.102629	-0.1599	-0.475527			1.649	0.0691842	0.0297308	0.0666388	0.05773	0.0819111
	1.65	0.0386396	0.0539119	0.0666388	0.020822	-0.0211768			1.65	0.0488212	0.0170039	0.0322762	0.00809509	0.0564573			1.65	-0.122992	-0.106447	-0.0657209	-0.1599	-0.452619			1.65	0.0793657	0.0602754	0.061548	0.0640934	0.0640934
	1.651	0.0182766	0.0513665	0.0666388	0.0106405	-0.0313583			1.651	0.0297308	0.0271854	0.037367	0.0310035	0.0640934			1.651	-0.122992	-0.101356	-0.073357	-0.163718	-0.439892			1.651	0.0882745	0.0500939	0.0526392	0.05773	0.0730023
	1.652	0.0271854	0.0348216	0.0628207	0.0220947	-0.0313583			1.652	0.0488212	0.0297308	0.0526392	0.0424577	0.0628207			1.652	-0.1459	-0.124265	-0.089902	-0.152264	-0.401711			1.652	0.104819	0.05773	0.0590027	0.074275	0.061548
	1.653	0.0348216	0.041185	0.0730023	0.037367	-0.016086			1.653	0.0488212	0.0106405	0.0386396	0.0500939	0.0628207			1.653	-0.119174	-0.103902	-0.0848113	-0.153536	-0.376257			1.653	0.0666388	0.0691842	0.0500939	0.0679115	0.0717296
	1.654	0.020822	0.0475485	0.0450031	0.0335489	-0.0186314			1.654	0.0475485	0.0220947	0.0246401	0.037367	0.0602754			1.654	-0.12681	-0.0988109	-0.0835386	-0.129355	-0.332986			1.654	0.0844565	0.0526392	0.0488212	0.078093	0.0666388
	1.655	0.0259127	0.0564573	0.0691842	0.0233674	-0.0135406			1.655	0.0437304	0.0322762	0.037367	0.0284581	0.0500939			1.655	-0.11281	-0.108992	-0.0809932	-0.130628	-0.324077			1.655	0.0793657	0.0602754	0.0500939	0.0691842	0.0666388
	1.656	0.020822	0.0513665	0.0666388	0.0322762	-0.00717719			1.656	0.0513665	0.0360943	0.0310035	0.0170039	0.0640934			1.656	-0.111538	-0.110265	-0.0720844	-0.144628	-0.315168			1.656	0.0857292	0.0628207	0.041185	0.078093	0.0628207
	1.657	0.0335489	0.0488212	0.061548	0.0322762	-0.00463181			1.657	0.0195493	0.0246401	0.0144585	0.0348216	0.0640934			1.657	-0.12681	-0.103902	-0.0835386	-0.129355	-0.293532			1.657	0.0857292	0.0551846	0.0500939	0.0819111	0.0284581
	1.658	0.0284581	0.0513665	0.0628207	0.0386396	0.00173164			1.658	0.0475485	0.0119132	0.041185	0.0170039	0.0666388			1.658	-0.12681	-0.0911747	-0.073357	-0.130628	-0.273169			1.658	0.094638	0.0564573	0.0526392	0.0882745	0.0348216
	1.659	0.0322762	0.0539119	0.0768203	0.0348216	0.0106405			1.659	0.0399123	0.0259127	0.0360943	0.0233674	0.0590027			1.659	-0.128083	-0.115356	-0.0797205	-0.110265	-0.241352			1.659	0.0933653	0.05773	0.0360943	0.0679115	0.0386396
	1.66	0.0348216	0.0488212	0.0590027	0.0513665	0.0182766			1.66	0.0437304	0.0195493	0.0526392	0.0131859	0.0500939			1.66	-0.130628	-0.102629	-0.0835386	-0.121719	-0.229898			1.66	0.0768203	0.05773	0.0437304	0.0666388	0.0602754
	1.661	0.0271854	0.0399123	0.05773	0.0500939	0.0144585			1.661	0.0488212	0.0246401	0.0335489	0.0170039	0.0500939			1.661	-0.121719	-0.100084	-0.0631755	-0.130628	-0.210808			1.661	0.078093	0.0539119	0.0590027	0.061548	0.0602754
	1.662	0.0335489	0.0424577	0.05773	0.0500939	0.0182766			1.662	0.0399123	0.0271854	0.0360943	0.0475485	0.0564573			1.662	-0.124265	-0.0988109	-0.0759024	-0.117901	-0.191717			1.662	0.0793657	0.0488212	0.0386396	0.074275	0.078093
	1.663	0.0386396	0.0437304	0.0704569	0.0666388	0.0119132			1.663	0.0386396	0.0131859	0.0271854	0.0488212	0.0628207			1.663	-0.130628	-0.110265	-0.0580848	-0.117901	-0.172627			1.663	0.0882745	0.0551846	0.0437304	0.0653661	0.0679115
	1.664	0.0259127	0.0526392	0.0628207	0.0437304	0.0233674			1.664	0.0539119	0.0360943	0.037367	0.037367	0.074275			1.664	-0.131901	-0.101356	-0.0619029	-0.11281	-0.158627			1.664	0.0691842	0.0564573	0.0488212	0.0691842	0.0717296
	1.665	0.0360943	0.0488212	0.0602754	0.0564573	0.0399123			1.665	0.0437304	0.0220947	0.0462758	0.0539119	0.0513665			1.665	-0.114083	-0.105174	-0.0771751	-0.119174	-0.142082			1.665	0.0806384	0.0500939	0.0399123	0.0590027	0.0831838
	1.666	0.0233674	0.0513665	0.0564573	0.0691842	0.0271854			1.666	0.0386396	0.0348216	0.0348216	0.0360943	0.05773			1.666	-0.119174	-0.101356	-0.0682663	-0.0962655	-0.12681			1.666	0.094638	0.0551846	0.037367	0.061548	0.0844565
	1.667	0.0297308	0.0539119	0.0628207	0.0590027	0.0526392			1.667	0.0424577	0.037367	0.0322762	0.0360943	0.0526392			1.667	-0.12681	-0.0962655	-0.0784478	-0.119174	-0.128083			1.667	0.0920926	0.0640934	0.0488212	0.0691842	0.0870019
	1.668	0.0386396	0.0539119	0.0666388	0.0717296	0.0386396			1.668	0.0424577	0.0182766	0.0348216	0.0284581	0.0679115			1.668	-0.114083	-0.0988109	-0.069539	-0.114083	-0.10772			1.668	0.0920926	0.0475485	0.0628207	0.078093	0.102274
	1.669	0.020822	0.0526392	0.0539119	0.0717296	0.0500939			1.669	0.0360943	0.0360943	0.0450031	0.0310035	0.05773			1.669	-0.129355	-0.105174	-0.0580848	-0.110265	-0.10772			1.669	0.074275	0.0679115	0.0539119	0.0844565	0.0831838
	1.67	0.037367	0.0424577	0.0640934	0.074275	0.0564573			1.67	0.0462758	0.0284581	0.0386396	0.0259127	0.0590027			1.67	-0.133174	-0.100084	-0.073357	-0.100084	-0.0886293			1.67	0.094638	0.0488212	0.0526392	0.0730023	0.0870019
	1.671	0.0170039	0.0360943	0.0628207	0.078093	0.0590027			1.671	0.0424577	0.0424577	0.0310035	0.0284581	0.078093			1.671	-0.110265	-0.0937201	-0.069539	-0.110265	-0.0784478			1.671	0.0806384	0.0590027	0.0386396	0.0691842	0.0819111
	1.672	0.0233674	0.0488212	0.0500939	0.0920926	0.0462758			1.672	0.0399123	0.020822	0.0335489	0.0271854	0.0628207			1.672	-0.124265	-0.0924474	-0.0593575	-0.103902	-0.0759024			1.672	0.0768203	0.0717296	0.0628207	0.0666388	0.0870019
	1.673	0.037367	0.0437304	0.0679115	0.0730023	0.0551846			1.673	0.037367	0.0182766	0.0348216	0.0310035	0.0475485			1.673	-0.11281	-0.103902	-0.0784478	-0.0962655	-0.052994			1.673	0.0793657	0.0539119	0.0691842	0.0768203	0.0819111
	1.674	0.0271854	0.05773	0.0704569	0.0768203	0.0653661			1.674	0.0437304	0.0450031	0.0284581	0.0335489	0.0640934			1.674	-0.124265	-0.103902	-0.0720844	-0.105174	-0.0313583			1.674	0.0844565	0.0539119	0.0475485	0.0704569	0.094638
	1.675	0.020822	0.0424577	0.0666388	0.094638	0.0691842			1.675	0.0424577	0.0297308	0.0462758	0.0475485	0.0704569			1.675	-0.129355	-0.089902	-0.0619029	-0.0848113	-0.0504486			1.675	0.0870019	0.061548	0.0475485	0.0793657	0.0768203
	1.676	0.0271854	0.0462758	0.0640934	0.0895472	0.078093			1.676	0.0488212	0.0233674	0.0322762	0.0488212	0.0628207			1.676	-0.114083	-0.102629	-0.0606302	-0.103902	-0.0249948			1.676	0.0704569	0.0653661	0.0500939	0.0793657	0.0691842
	1.677	0.0259127	0.0539119	0.0717296	0.0997288	0.0526392			1.677	0.0488212	0.037367	0.0437304	0.0399123	0.0666388			1.677	-0.124265	-0.0886293	-0.0657209	-0.0797205	-0.0173587			1.677	0.0933653	0.0590027	0.0526392	0.0640934	0.0768203
	1.678	0.0322762	0.0399123	0.0653661	0.094638	0.0793657			1.678	0.0386396	0.0182766	0.0335489	0.0488212	0.0488212			1.678	-0.116628	-0.0937201	-0.0644482	-0.106447	-0.0211768			1.678	0.0857292	0.0679115	0.0691842	0.074275	0.0908199
	1.679	0.037367	0.0475485	0.0628207	0.094638	0.0870019			1.679	0.0462758	0.0246401	0.0437304	0.0539119	0.05773			1.679	-0.134446	-0.0911747	-0.073357	-0.0924474	-0.00844988			1.679	0.104819	0.0640934	0.0640934	0.0653661	0.0857292
	1.68	0.0246401	0.0386396	0.0793657	0.0984561	0.0768203			1.68	0.0310035	0.0284581	0.0271854	0.061548	0.0590027			1.68	-0.119174	-0.0835386	-0.0644482	-0.0886293	0.00300433			1.68	0.074275	0.0602754	0.0526392	0.0704569	0.0793657
	1.681	0.0399123	0.0488212	0.0640934	0.0997288	0.0908199			1.681	0.037367	0.0386396	0.0310035	0.0768203	0.0564573			1.681	-0.124265	-0.101356	-0.0682663	-0.100084	0.00173164			1.681	0.0755476	0.0539119	0.0564573	0.0590027	0.0831838
	1.682	0.0259127	0.0539119	0.05773	0.0933653	0.0793657			1.682	0.0322762	0.0182766	0.041185	0.0564573	0.0819111			1.682	-0.108992	-0.0911747	-0.0631755	-0.0962655	0.0131859			1.682	0.0768203	0.0704569	0.0526392	0.0806384	0.0755476
	1.683	0.0284581	0.0386396	0.061548	0.0984561	0.0882745			1.683	0.0500939	0.0310035	0.0335489	0.0653661	0.0602754			1.683	-0.120447	-0.0937201	-0.0580848	-0.0988109	0.0182766			1.683	0.0870019	0.0590027	0.0462758	0.0793657	0.0628207
	1.684	0.0297308	0.0437304	0.0691842	0.0971834	0.0882745			1.684	0.041185	0.0271854	0.037367	0.0666388	0.0539119			1.684	-0.131901	-0.0975382	-0.0619029	-0.0873566	0.020822			1.684	0.0806384	0.0500939	0.0679115	0.0640934	0.0679115
	1.685	0.041185	0.0437304	0.0602754	0.10991	0.094638			1.685	0.0475485	0.0335489	0.0322762	0.0590027	0.0628207			1.685	-0.121719	-0.0937201	-0.0568121	-0.0962655	0.0233674			1.685	0.0857292	0.0679115	0.0640934	0.0704569	0.0857292
	1.686	0.0233674	0.0513665	0.0704569	0.108638	0.0882745			1.686	0.0360943	0.0220947	0.0386396	0.0564573	0.0628207			1.686	-0.117901	-0.0911747	-0.0746297	-0.111538	0.0170039			1.686	0.0819111	0.0768203	0.0551846	0.0653661	0.0666388
	1.687	0.041185	0.0475485	0.0704569	0.108638	0.0959107			1.687	0.0539119	0.0259127	0.0335489	0.0526392	0.0602754			1.687	-0.131901	-0.106447	-0.0657209	-0.101356	0.0437304			1.687	0.0793657	0.0691842	0.0679115	0.0768203	0.074275
	1.688	0.0399123	0.0437304	0.0704569	0.113728	0.101001			1.688	0.0386396	0.0322762	0.0424577	0.0462758	0.0679115			1.688	-0.143355	-0.0937201	-0.0669936	-0.105174	0.0437304			1.688	0.0857292	0.0475485	0.05773	0.0691842	0.0920926
	1.689	0.0170039	0.0437304	0.0628207	0.10991	0.102274			1.689	0.0424577	0.0144585	0.0246401	0.0539119	0.0679115			1.689	-0.105174	-0.105174	-0.0708117	-0.106447	0.0424577			1.689	0.0857292	0.0679115	0.0475485	0.0590027	0.094638
	1.69	0.0335489	0.0500939	0.0717296	0.0997288	0.106092			1.69	0.0399123	0.0348216	0.0386396	0.0462758	0.0628207			1.69	-0.110265	-0.0911747	-0.0644482	-0.105174	0.0513665			1.69	0.0870019	0.0691842	0.078093	0.0666388	0.0984561
	1.691	0.0284581	0.0488212	0.0602754	0.108638	0.102274			1.691	0.0437304	0.0233674	0.0297308	0.0475485	0.0564573			1.691	-0.124265	-0.089902	-0.0568121	-0.0835386	0.0691842			1.691	0.0793657	0.0500939	0.0653661	0.074275	0.094638
	1.692	0.0322762	0.0500939	0.0640934	0.106092	0.115001			1.692	0.0475485	0.0157312	0.0462758	0.0564573	0.0704569			1.692	-0.10772	-0.0784478	-0.0428125	-0.0937201	0.0691842			1.692	0.0691842	0.0475485	0.0628207	0.0666388	0.0997288
	1.693	0.0360943	0.0424577	0.0730023	0.108638	0.113728			1.693	0.0322762	0.0348216	0.0399123	0.0424577	0.0679115			1.693	-0.10772	-0.115356	-0.0669936	-0.0949928	0.0640934			1.693	0.0819111	0.061548	0.061548	0.078093	0.0844565
	1.694	0.0233674	0.0564573	0.05773	0.121365	0.117546			1.694	0.0424577	0.0284581	0.0220947	0.041185	0.0526392			1.694	-0.122992	-0.0797205	-0.0580848	-0.0835386	0.0602754			1.694	0.0933653	0.05773	0.0564573	0.0730023	0.0882745
	1.695	0.0360943	0.0539119	0.061548	0.125183	0.121365			1.695	0.0284581	0.0284581	0.0284581	0.05773	0.0640934			1.695	-0.101356	-0.0873566	-0.0771751	-0.0835386	0.0717296			1.695	0.0882745	0.0755476	0.0551846	0.0666388	0.0959107
	1.696	0.0335489	0.0564573	0.0590027	0.134091	0.125183			1.696	0.0500939	0.0195493	0.0297308	0.0526392	0.0653661			1.696	-0.122992	-0.0848113	-0.0555394	-0.0924474	0.0844565			1.696	0.0895472	0.05773	0.0488212	0.0831838	0.0679115
	1.697	0.0360943	0.0475485	0.0730023	0.120092	0.115001			1.697	0.0462758	0.0284581	0.0284581	0.0513665	0.061548			1.697	-0.125537	-0.0949928	-0.0746297	-0.0937201	0.078093			1.697	0.0806384	0.05773	0.0564573	0.0793657	0.0768203
	1.698	0.0399123	0.0539119	0.0691842	0.118819	0.117546			1.698	0.0360943	0.0170039	0.0348216	0.0551846	0.0628207			1.698	-0.103902	-0.0949928	-0.0631755	-0.0937201	0.074275			1.698	0.0793657	0.0819111	0.0488212	0.074275	0.0870019
	1.699	0.0271854	0.0475485	0.0717296	0.12391	0.120092			1.699	0.0322762	0.0322762	0.0271854	0.05773	0.0666388			1.699	-0.122992	-0.105174	-0.0644482	-0.0809932	0.0819111			1.699	0.0717296	0.0602754	0.061548	0.0793657	0.0882745
	1.7	0.0437304	0.0590027	0.0768203	0.121365	0.121365			1.7	0.0310035	0.0170039	0.0386396	0.0640934	0.0640934			1.7	-0.12681	-0.0949928	-0.0835386	-0.0886293	0.0895472			1.7	0.0844565	0.0590027	0.0640934	0.0793657	0.0882745
	1.701	0.0386396	0.0462758	0.0640934	0.137909	0.117546			1.701	0.0424577	0.0233674	0.0551846	0.0691842	0.0640934			1.701	-0.111538	-0.0924474	-0.0580848	-0.0924474	0.103547			1.701	0.0819111	0.0691842	0.0500939	0.0730023	0.0806384
	1.702	0.0233674	0.0399123	0.0653661	0.132819	0.115001			1.702	0.0462758	0.020822	0.0310035	0.061548	0.0513665			1.702	-0.108992	-0.0937201	-0.0593575	-0.0924474	0.0895472			1.702	0.0895472	0.0704569	0.05773	0.0755476	0.0908199
	1.703	0.0220947	0.0462758	0.0691842	0.137909	0.131546			1.703	0.0399123	0.0310035	0.0233674	0.0424577	0.0590027			1.703	-0.131901	-0.089902	-0.0631755	-0.0835386	0.0933653			1.703	0.0870019	0.0640934	0.078093	0.05773	0.0844565
	1.704	0.0310035	0.0564573	0.0730023	0.131546	0.121365			1.704	0.0335489	0.020822	0.0360943	0.0602754	0.0628207			1.704	-0.120447	-0.0924474	-0.0657209	-0.0886293	0.101001			1.704	0.0768203	0.0564573	0.0704569	0.074275	0.074275
	1.705	0.020822	0.0424577	0.0691842	0.122637	0.127728			1.705	0.0450031	0.0284581	0.037367	0.0526392	0.0628207			1.705	-0.121719	-0.105174	-0.0644482	-0.0848113	0.0984561			1.705	0.0908199	0.0666388	0.0653661	0.0730023	0.074275
	1.706	0.0297308	0.05773	0.0691842	0.125183	0.126455			1.706	0.0424577	0.0233674	0.037367	0.0679115	0.0539119			1.706	-0.110265	-0.0962655	-0.0644482	-0.0911747	0.0997288			1.706	0.0857292	0.061548	0.0539119	0.0551846	0.0959107
	1.707	0.0259127	0.0475485	0.0628207	0.113728	0.136637			1.707	0.0462758	0.0233674	0.0475485	0.0500939	0.0640934			1.707	-0.131901	-0.0962655	-0.0657209	-0.0988109	0.107365			1.707	0.0882745	0.061548	0.0666388	0.0679115	0.0870019
	1.708	0.0348216	0.0475485	0.0679115	0.120092	0.134091			1.708	0.0424577	0.0259127	0.0233674	0.0691842	0.0640934			1.708	-0.120447	-0.0949928	-0.069539	-0.069539	0.120092			1.708	0.0908199	0.0691842	0.0551846	0.0755476	0.0755476
	1.709	0.0322762	0.0590027	0.0730023	0.126455	0.126455			1.709	0.041185	0.0284581	0.0310035	0.0488212	0.0526392			1.709	-0.114083	-0.0809932	-0.0631755	-0.0797205	0.136637			1.709	0.0908199	0.0704569	0.0793657	0.074275	0.0895472
	1.71	0.0322762	0.041185	0.0666388	0.115001	0.132819			1.71	0.0360943	0.0335489	0.0284581	0.0551846	0.061548			1.71	-0.119174	-0.105174	-0.0606302	-0.0886293	0.107365			1.71	0.0844565	0.0666388	0.074275	0.0730023	0.0920926
	1.711	0.0284581	0.0475485	0.0666388	0.125183	0.130273			1.711	0.0399123	0.0259127	0.0322762	0.0488212	0.0475485			1.711	-0.12681	-0.0924474	-0.073357	-0.0822659	0.108638			1.711	0.0819111	0.0488212	0.0539119	0.0768203	0.0882745
	1.712	0.0348216	0.0564573	0.0704569	0.129001	0.12391			1.712	0.0437304	0.0297308	0.037367	0.0437304	0.061548			1.712	-0.117901	-0.0949928	-0.0619029	-0.0873566	0.116274			1.712	0.0730023	0.078093	0.0640934	0.0691842	0.0933653
	1.713	0.0297308	0.0450031	0.074275	0.125183	0.130273			1.713	0.037367	0.0322762	0.0322762	0.0450031	0.0526392			1.713	-0.124265	-0.101356	-0.0606302	-0.0771751	0.120092			1.713	0.0768203	0.0539119	0.0666388	0.0793657	0.0844565
	1.714	0.0297308	0.0539119	0.0666388	0.135364	0.130273			1.714	0.0475485	0.0182766	0.0437304	0.0513665	0.0488212			1.714	-0.103902	-0.110265	-0.0631755	-0.0873566	0.127728			1.714	0.0844565	0.0500939	0.0640934	0.0653661	0.0959107
	1.715	0.0322762	0.0539119	0.0564573	0.120092	0.130273			1.715	0.0450031	0.0195493	0.0386396	0.0450031	0.0679115			1.715	-0.110265	-0.0924474	-0.0644482	-0.0784478	0.120092			1.715	0.0768203	0.0526392	0.0602754	0.0717296	0.0819111
	1.716	0.0284581	0.0500939	0.0768203	0.135364	0.145546			1.716	0.0475485	0.020822	0.0284581	0.0590027	0.0653661			1.716	-0.116628	-0.0924474	-0.0517213	-0.0720844	0.117546			1.716	0.0870019	0.0551846	0.0640934	0.0717296	0.0971834
	1.717	0.0335489	0.0513665	0.078093	0.120092	0.134091			1.717	0.0450031	0.0322762	0.0437304	0.0513665	0.0526392			1.717	-0.114083	-0.0759024	-0.069539	-0.0835386	0.125183			1.717	0.0844565	0.074275	0.0551846	0.0755476	0.0870019
	1.718	0.0348216	0.0539119	0.0590027	0.118819	0.12391			1.718	0.041185	0.0335489	0.037367	0.0500939	0.0590027			1.718	-0.119174	-0.0924474	-0.0619029	-0.0657209	0.121365			1.718	0.0704569	0.0653661	0.0653661	0.0793657	0.0831838
	1.719	0.041185	0.0564573	0.0602754	0.149364	0.130273			1.719	0.020822	0.0195493	0.0360943	0.0539119	0.0564573			1.719	-0.119174	-0.0911747	-0.0606302	-0.073357	0.134091			1.719	0.0819111	0.0539119	0.0526392	0.0730023	0.0882745
	1.72	0.0360943	0.0360943	0.0628207	0.134091	0.131546			1.72	0.0335489	0.0144585	0.0297308	0.0500939	0.0602754			1.72	-0.129355	-0.0962655	-0.0631755	-0.089902	0.139182			1.72	0.0755476	0.0602754	0.0513665	0.0628207	0.0755476
	1.721	0.0335489	0.0564573	0.0590027	0.137909	0.125183			1.721	0.0564573	0.0246401	0.0131859	0.0590027	0.0564573			1.721	-0.115356	-0.0962655	-0.0644482	-0.0759024	0.135364			1.721	0.074275	0.05773	0.0602754	0.0831838	0.0933653
	1.722	0.0360943	0.0424577	0.0640934	0.144273	0.130273			1.722	0.0297308	0.0259127	0.0297308	0.05773	0.0666388			1.722	-0.124265	-0.102629	-0.0759024	-0.0631755	0.145546			1.722	0.0959107	0.0602754	0.0590027	0.0870019	0.0730023
	1.723	0.0271854	0.0564573	0.0691842	0.127728	0.131546			1.723	0.0424577	0.0233674	0.0348216	0.05773	0.0539119			1.723	-0.115356	-0.0873566	-0.0606302	-0.073357	0.155727			1.723	0.0882745	0.0679115	0.0551846	0.0819111	0.0882745
	1.724	0.0284581	0.037367	0.0730023	0.135364	0.125183			1.724	0.0348216	0.020822	0.0144585	0.0551846	0.0628207			1.724	-0.129355	-0.103902	-0.0619029	-0.073357	0.141728			1.724	0.0920926	0.0526392	0.0704569	0.074275	0.102274
	1.725	0.0259127	0.0539119	0.0755476	0.141728	0.12391			1.725	0.0590027	0.0131859	0.00809509	0.0500939	0.0602754			1.725	-0.124265	-0.0886293	-0.0542667	-0.073357	0.146818			1.725	0.0882745	0.0488212	0.0730023	0.0895472	0.0666388
	1.726	0.0310035	0.0488212	0.0653661	0.135364	0.130273			1.726	0.0424577	0.0220947	0.00936778	0.0551846	0.0590027			1.726	-0.12681	-0.089902	-0.0568121	-0.0835386	0.137909			1.726	0.0793657	0.0399123	0.0768203	0.0717296	0.0806384
	1.727	0.0386396	0.0539119	0.0640934	0.134091	0.113728			1.727	0.0450031	0.0246401	0.0068224	0.0564573	0.0590027			1.727	-0.119174	-0.0886293	-0.0580848	-0.105174	0.158273			1.727	0.078093	0.0679115	0.0513665	0.0793657	0.0882745
	1.728	0.0259127	0.0628207	0.0844565	0.137909	0.125183			1.728	0.0424577	0.0386396	0.00554971	0.0551846	0.0462758			1.728	-0.134446	-0.0962655	-0.073357	-0.0759024	0.151909			1.728	0.0857292	0.0602754	0.0755476	0.074275	0.0793657
	1.729	0.0322762	0.0590027	0.0768203	0.131546	0.120092			1.729	0.037367	0.0310035	0.00173164	0.0462758	0.0628207			1.729	-0.125537	-0.102629	-0.0568121	-0.0809932	0.159545			1.729	0.0882745	0.0602754	0.0653661	0.0768203	0.078093
	1.73	0.0386396	0.0437304	0.0679115	0.131546	0.125183			1.73	0.0424577	0.0233674	0.0068224	0.0679115	0.0564573			1.73	-0.100084	-0.0937201	-0.0428125	-0.086084	0.148091			1.73	0.0844565	0.05773	0.0679115	0.0704569	0.0895472
	1.731	0.0271854	0.0526392	0.0768203	0.125183	0.129001			1.731	0.0462758	0.0246401	0.0297308	0.0691842	0.061548			1.731	-0.111538	-0.0848113	-0.0542667	-0.0809932	0.167181			1.731	0.0908199	0.0590027	0.0666388	0.0730023	0.0730023
	1.732	0.0271854	0.0539119	0.0831838	0.130273	0.120092			1.732	0.0450031	0.0322762	0.0424577	0.0513665	0.0564573			1.732	-0.11281	-0.103902	-0.0275402	-0.0606302	0.157			1.732	0.074275	0.074275	0.0590027	0.0819111	0.0793657
	1.733	0.0144585	0.0564573	0.0793657	0.130273	0.107365			1.733	0.0386396	0.0195493	0.0500939	0.0590027	0.061548			1.733	-0.130628	-0.0924474	-0.0542667	-0.069539	0.172272			1.733	0.0806384	0.0653661	0.0691842	0.074275	0.0984561
	1.734	0.0360943	0.0488212	0.05773	0.12391	0.113728			1.734	0.0475485	0.0310035	0.0640934	0.0640934	0.0475485			1.734	-0.122992	-0.0848113	-0.0593575	-0.0797205	0.146818			1.734	0.0755476	0.0488212	0.0691842	0.074275	0.0806384
	1.735	0.0284581	0.0513665	0.074275	0.131546	0.108638			1.735	0.0348216	0.0271854	0.074275	0.0539119	0.0539119			1.735	-0.116628	-0.0949928	-0.0542667	-0.069539	0.170999			1.735	0.0730023	0.0653661	0.0640934	0.0679115	0.0819111
	1.736	0.0246401	0.0526392	0.0679115	0.131546	0.113728			1.736	0.037367	0.0284581	0.0717296	0.0628207	0.0602754			1.736	-0.106447	-0.0962655	-0.0453579	-0.0657209	0.167181			1.736	0.0831838	0.0679115	0.0539119	0.0628207	0.0984561
	1.737	0.0310035	0.0539119	0.061548	0.120092	0.118819			1.737	0.0284581	0.0233674	0.0844565	0.0488212	0.0691842			1.737	-0.124265	-0.0924474	-0.052994	-0.0580848	0.160818			1.737	0.0895472	0.05773	0.0539119	0.0679115	0.074275
	1.738	0.0335489	0.0437304	0.0628207	0.121365	0.117546			1.738	0.0386396	0.0220947	0.0730023	0.0462758	0.05773			1.738	-0.119174	-0.0949928	-0.052994	-0.0606302	0.170999			1.738	0.0908199	0.0551846	0.074275	0.078093	0.0908199
	1.739	0.0386396	0.0462758	0.0691842	0.121365	0.118819			1.739	0.0399123	0.0233674	0.078093	0.0526392	0.0500939			1.739	-0.106447	-0.089902	-0.0631755	-0.0504486	0.174817			1.739	0.0870019	0.0640934	0.0679115	0.0653661	0.0844565
	1.74	0.0335489	0.05773	0.0653661	0.120092	0.125183			1.74	0.0335489	0.0246401	0.0704569	0.041185	0.0590027			1.74	-0.0962655	-0.106447	-0.0517213	-0.0580848	0.17609			1.74	0.0793657	0.0640934	0.0602754	0.0717296	0.0819111
	1.741	0.0348216	0.0539119	0.0679115	0.121365	0.125183			1.741	0.0564573	0.0246401	0.0679115	0.0640934	0.0526392			1.741	-0.117901	-0.106447	-0.052994	-0.0631755	0.188817			1.741	0.074275	0.0590027	0.0793657	0.0755476	0.0882745
	1.742	0.0386396	0.05773	0.061548	0.134091	0.125183			1.742	0.0437304	0.0233674	0.0717296	0.0475485	0.0691842			1.742	-0.122992	-0.0988109	-0.0593575	-0.069539	0.186272			1.742	0.0768203	0.0602754	0.05773	0.0857292	0.0920926
	1.743	0.0399123	0.061548	0.0602754	0.12391	0.130273			1.743	0.0386396	0.037367	0.0640934	0.0640934	0.0717296			1.743	-0.111538	-0.073357	-0.0466306	-0.0466306	0.170999			1.743	0.0933653	0.061548	0.0717296	0.074275	0.0882745
	1.744	0.0284581	0.0500939	0.0730023	0.131546	0.130273			1.744	0.0386396	0.0284581	0.0475485	0.061548	0.0526392			1.744	-0.102629	-0.100084	-0.0606302	-0.0619029	0.182454			1.744	0.0844565	0.0526392	0.061548	0.0793657	0.0730023
	1.745	0.0297308	0.061548	0.061548	0.126455	0.130273			1.745	0.0462758	0.0271854	0.0386396	0.0564573	0.0590027			1.745	-0.10772	-0.089902	-0.0606302	-0.0542667	0.168454			1.745	0.0895472	0.0704569	0.0793657	0.0793657	0.0908199
	1.746	0.0297308	0.0539119	0.0755476	0.130273	0.130273			1.746	0.0437304	0.0182766	0.0475485	0.0602754	0.0590027			1.746	-0.101356	-0.0809932	-0.0555394	-0.0593575	0.179908			1.746	0.0640934	0.0691842	0.0704569	0.0691842	0.101001
	1.747	0.0297308	0.0564573	0.074275	0.113728	0.143			1.747	0.0386396	0.0233674	0.041185	0.0526392	0.0590027			1.747	-0.110265	-0.102629	-0.0466306	-0.0555394	0.186272			1.747	0.094638	0.0768203	0.0679115	0.0793657	0.0933653
	1.748	0.041185	0.0437304	0.0602754	0.12391	0.130273			1.748	0.0386396	0.020822	0.0284581	0.0488212	0.0437304			1.748	-0.105174	-0.0924474	-0.073357	-0.049176	0.181181			1.748	0.074275	0.0564573	0.0691842	0.074275	0.0959107
[truncated: 6,251 more rows]
