# Supplementary material for: Crystal structures of bacterial small multidrug resistance transporter EmrE in complex with structurally diverse substrates
Source: eLife. 2022 Mar 7;11:e76766. doi: 10.7554/eLife.76766 (PMC9000954; doi:10.7554/eLife.76766)
Supplement: Figure 1—source data 2. [file elife-76766-fig1-data2.xlsx]

## Sheet: Sheet1
(mM)	EmrE with TPA	EmrE with Phe	EmrE3 with TPA	EmrE3 with Phe
0.03	0.6888	0.136333	0.6794	0.1102
0.1	0.8508	0.304333	1.2056	0.2132
0.3	1.2942	0.725333	2.23	0.4316
1	1.926	1.22667	3.358	0.8698
3	2.672	2.10333	4.714	1.062
