# Supplementary material for: Crystal structures of bacterial small multidrug resistance transporter EmrE in complex with structurally diverse substrates
Source: eLife. 2022 Mar 7;11:e76766. doi: 10.7554/eLife.76766 (PMC9000954; doi:10.7554/eLife.76766)
Supplement: Figure 1—source data 3. [file elife-76766-fig1-data3.xlsx]

## Sheet: Sheet1
[Mb], nM	Trial 1	Trial 2	Trial 3
0	654.492	656.761	658.746
30	668.243	670.604	658.453
100	663.382	665.57	659.986
300	683.125	677.59	668.277
1000	711.22	714.032	711.948
3000	759.531	754.889
10000	795.887	788.502
30000	791.494	815.39	801.138
100000	814.47	813.033	814.066
