# Supplementary material for: Crystal structures of bacterial small multidrug resistance transporter EmrE in complex with structurally diverse substrates
Source: eLife. 2022 Mar 7;11:e76766. doi: 10.7554/eLife.76766 (PMC9000954; doi:10.7554/eLife.76766)
Supplement: Figure 1—source data 4. [file elife-76766-fig1-data4.xlsx]

## Sheet: Sheet1
	Time (sec)	1 mM Phe, No L10 Mb	1 mM Phe, with 10 µM L10 Mb	1 mM Phe, no L10 Mb
	0	0.0870019	0.0437304	0.0640934
	0.001	0.0831838	0.0551846	0.0691842
	0.002	0.0819111	0.0526392	0.0602754
	0.003	0.0882745	0.0475485	0.0602754
	0.004	0.0819111	0.0399123	0.0653661
	0.005	0.0971834	0.0424577	0.0653661
	0.006	0.0806384	0.037367	0.074275
	0.007	0.0806384	0.0488212	0.0730023
	0.008	0.101001	0.0513665	0.078093
	0.009	0.0870019	0.0500939	0.0704569
	0.01	0.107365	0.061548	0.061548
	0.011	0.0857292	0.0679115	0.0666388
	0.012	0.0920926	0.0437304	0.0704569
	0.013	0.0908199	0.0628207	0.0691842
	0.014	0.0793657	0.0500939	0.0831838
	0.015	0.0870019	0.0450031	0.05773
	0.016	0.0984561	0.0526392	0.0704569
	0.017	0.078093	0.0564573	0.0806384
	0.018	0.102274	0.0526392	0.061548
	0.019	0.0793657	0.0462758	0.0653661
	0.02	0.0870019	0.0564573	0.0704569
	0.021	0.0870019	0.0475485	0.0755476
	0.022	0.0857292	0.0462758	0.0666388
	0.023	0.0806384	0.0526392	0.0755476
	0.024	0.0768203	0.0640934	0.0666388
	0.025	0.094638	0.0462758	0.0768203
	0.026	0.0971834	0.0666388	0.0691842
	0.027	0.0831838	0.05773	0.0717296
	0.028	0.074275	0.0513665	0.0717296
	0.029	0.0730023	0.05773	0.0793657
	0.03	0.0895472	0.0539119	0.0730023
	0.031	0.0806384	0.041185	0.0602754
	0.032	0.0768203	0.0526392	0.0793657
	0.033	0.078093	0.0564573	0.0730023
	0.034	0.0882745	0.0539119	0.0717296
	0.035	0.0882745	0.0488212	0.0793657
	0.036	0.0640934	0.0437304	0.0653661
	0.037	0.0831838	0.0399123	0.0640934
	0.038	0.0768203	0.0691842	0.0717296
	0.039	0.0870019	0.0475485	0.0768203
	0.04	0.0755476	0.0602754	0.0602754
	0.041	0.0882745	0.0513665	0.0602754
	0.042	0.078093	0.0437304	0.0768203
	0.043	0.0844565	0.0437304	0.0691842
	0.044	0.0793657	0.0488212	0.0768203
	0.045	0.0971834	0.037367	0.0755476
	0.046	0.0971834	0.0551846	0.0564573
	0.047	0.0819111	0.0322762	0.0704569
	0.048	0.0793657	0.0424577	0.0590027
	0.049	0.0857292	0.0551846	0.0679115
	0.05	0.0882745	0.0437304	0.0755476
	0.051	0.0882745	0.0475485	0.0602754
	0.052	0.0984561	0.0488212	0.0755476
	0.053	0.0908199	0.0462758	0.0666388
	0.054	0.0831838	0.0462758	0.0628207
	0.055	0.0691842	0.0386396	0.0691842
	0.056	0.094638	0.041185	0.0653661
	0.057	0.0997288	0.0590027	0.074275
	0.058	0.0920926	0.0335489	0.0564573
	0.059	0.0857292	0.0437304	0.0793657
	0.06	0.0882745	0.0322762	0.0730023
	0.061	0.078093	0.0526392	0.0640934
	0.062	0.078093	0.0322762	0.0691842
	0.063	0.0908199	0.0360943	0.0602754
	0.064	0.0920926	0.0437304	0.0628207
	0.065	0.0819111	0.0437304	0.0640934
	0.066	0.104819	0.0602754	0.0691842
	0.067	0.0844565	0.0284581	0.0704569
	0.068	0.0768203	0.0488212	0.05773
	0.069	0.0857292	0.037367	0.05773
	0.07	0.0844565	0.0437304	0.0704569
	0.071	0.0831838	0.0386396	0.0653661
	0.072	0.0870019	0.041185	0.074275
	0.073	0.094638	0.0539119	0.0602754
	0.074	0.0819111	0.0284581	0.0513665
	0.075	0.0844565	0.0500939	0.0564573
	0.076	0.0882745	0.0399123	0.0704569
	0.077	0.0844565	0.0462758	0.0602754
	0.078	0.0755476	0.0259127	0.0564573
	0.079	0.0730023	0.0488212	0.074275
	0.08	0.0895472	0.0348216	0.0653661
	0.081	0.0844565	0.0386396	0.0590027
	0.082	0.0882745	0.0399123	0.0691842
	0.083	0.0831838	0.0322762	0.0666388
	0.084	0.0679115	0.0399123	0.0730023
	0.085	0.0768203	0.0500939	0.0640934
	0.086	0.094638	0.0386396	0.05773
	0.087	0.0908199	0.0437304	0.0551846
	0.088	0.0831838	0.0360943	0.0691842
	0.089	0.0844565	0.0360943	0.0793657
	0.09	0.0844565	0.0246401	0.0640934
	0.091	0.0870019	0.0259127	0.0488212
	0.092	0.0908199	0.0348216	0.0500939
	0.093	0.0831838	0.0259127	0.0666388
	0.094	0.0806384	0.0539119	0.0590027
	0.095	0.0920926	0.0424577	0.0691842
	0.096	0.0895472	0.0271854	0.0640934
	0.097	0.0870019	0.041185	0.0679115
	0.098	0.0793657	0.0437304	0.0602754
	0.099	0.0933653	0.0602754	0.05773
	0.1	0.0857292	0.0335489	0.0564573
	0.101	0.0920926	0.0437304	0.0628207
	0.102	0.0691842	0.0462758	0.0628207
	0.103	0.0857292	0.0386396	0.0704569
	0.104	0.0882745	0.0335489	0.0628207
	0.105	0.0882745	0.0310035	0.061548
	0.106	0.0844565	0.0259127	0.0564573
	0.107	0.0793657	0.0437304	0.0602754
	0.108	0.0908199	0.0424577	0.0653661
	0.109	0.0920926	0.0322762	0.0717296
	0.11	0.0831838	0.0284581	0.0717296
	0.111	0.0755476	0.0271854	0.0640934
	0.112	0.0806384	0.037367	0.0564573
	0.113	0.0857292	0.0297308	0.0628207
	0.114	0.0908199	0.0322762	0.0717296
	0.115	0.0920926	0.0322762	0.0679115
	0.116	0.0844565	0.0348216	0.0717296
	0.117	0.0793657	0.0360943	0.061548
	0.118	0.0768203	0.0310035	0.0628207
	0.119	0.0920926	0.0399123	0.0717296
	0.12	0.0870019	0.0284581	0.0526392
	0.121	0.0882745	0.0246401	0.0590027
	0.122	0.0933653	0.0386396	0.0628207
	0.123	0.0895472	0.0386396	0.0717296
	0.124	0.0768203	0.0360943	0.0691842
	0.125	0.0870019	0.0360943	0.0602754
	0.126	0.0844565	0.0284581	0.0653661
	0.127	0.0691842	0.041185	0.0691842
	0.128	0.078093	0.0322762	0.0653661
	0.129	0.0793657	0.0386396	0.074275
	0.13	0.0857292	0.0220947	0.0653661
	0.131	0.074275	0.0322762	0.078093
	0.132	0.0806384	0.037367	0.0755476
	0.133	0.0691842	0.0284581	0.061548
	0.134	0.074275	0.0297308	0.0717296
	0.135	0.0971834	0.0360943	0.0653661
	0.136	0.0730023	0.0399123	0.061548
	0.137	0.0717296	0.0246401	0.0590027
	0.138	0.0908199	0.0360943	0.074275
	0.139	0.0730023	0.0297308	0.05773
	0.14	0.0831838	0.0348216	0.0831838
	0.141	0.0666388	0.0271854	0.0590027
	0.142	0.0730023	0.0360943	0.0730023
	0.143	0.078093	0.0246401	0.0691842
	0.144	0.0959107	0.037367	0.05773
	0.145	0.0755476	0.0284581	0.0730023
	0.146	0.0755476	0.020822	0.0691842
	0.147	0.0831838	0.0424577	0.0551846
	0.148	0.0793657	0.0310035	0.0679115
	0.149	0.0806384	0.0259127	0.05773
	0.15	0.0730023	0.0220947	0.0640934
	0.151	0.0870019	0.0335489	0.0551846
	0.152	0.0730023	0.0310035	0.0793657
	0.153	0.0819111	0.0322762	0.05773
	0.154	0.0768203	0.0348216	0.0640934
	0.155	0.0895472	0.0462758	0.0628207
	0.156	0.074275	0.0386396	0.061548
	0.157	0.0857292	0.0360943	0.0488212
	0.158	0.0831838	0.0246401	0.0704569
	0.159	0.074275	0.0284581	0.0640934
	0.16	0.0679115	0.0284581	0.0653661
	0.161	0.0819111	0.0360943	0.0628207
	0.162	0.0768203	0.0386396	0.0691842
	0.163	0.0844565	0.0399123	0.0500939
	0.164	0.0882745	0.0348216	0.0628207
	0.165	0.0768203	0.0271854	0.05773
	0.166	0.0730023	0.037367	0.0602754
	0.167	0.0908199	0.0335489	0.0640934
	0.168	0.0691842	0.0271854	0.0640934
	0.169	0.0844565	0.0360943	0.0551846
	0.17	0.0717296	0.0310035	0.0602754
	0.171	0.0806384	0.037367	0.0691842
	0.172	0.0768203	0.0450031	0.05773
	0.173	0.0831838	0.0500939	0.0640934
	0.174	0.0730023	0.0539119	0.0602754
	0.175	0.0870019	0.0551846	0.0539119
	0.176	0.0844565	0.0730023	0.0551846
	0.177	0.0844565	0.0870019	0.0628207
	0.178	0.0895472	0.0793657	0.0602754
	0.179	0.0755476	0.107365	0.0640934
	0.18	0.0908199	0.094638	0.0691842
	0.181	0.078093	0.0895472	0.0462758
	0.182	0.0882745	0.0730023	0.0666388
	0.183	0.074275	0.0908199	0.0475485
	0.184	0.0768203	0.0793657	0.0640934
	0.185	0.0691842	0.0819111	0.0602754
	0.186	0.0755476	0.0717296	0.0730023
	0.187	0.0755476	0.0640934	0.0730023
	0.188	0.0768203	0.0704569	0.0539119
	0.189	0.0844565	0.0590027	0.0513665
	0.19	0.0768203	0.074275	0.0679115
	0.191	0.0679115	0.0679115	0.0602754
	0.192	0.0819111	0.0870019	0.0590027
	0.193	0.0666388	0.0793657	0.0691842
	0.194	0.0640934	0.0793657	0.0526392
	0.195	0.078093	0.074275	0.0602754
	0.196	0.0730023	0.0590027	0.0704569
	0.197	0.0653661	0.0755476	0.0602754
	0.198	0.0704569	0.0768203	0.05773
	0.199	0.0793657	0.0793657	0.0717296
	0.2	0.0806384	0.078093	0.0602754
	0.201	0.0679115	0.0844565	0.061548
	0.202	0.0768203	0.0819111	0.0679115
	0.203	0.0768203	0.0806384	0.0500939
	0.204	0.0831838	0.0755476	0.078093
	0.205	0.074275	0.0857292	0.0679115
	0.206	0.0793657	0.0602754	0.0679115
	0.207	0.078093	0.0844565	0.0640934
	0.208	0.0806384	0.0933653	0.0679115
	0.209	0.0653661	0.0882745	0.0628207
	0.21	0.0602754	0.074275	0.0640934
	0.211	0.0806384	0.0844565	0.0691842
	0.212	0.0831838	0.0882745	0.0602754
	0.213	0.074275	0.0844565	0.05773
	0.214	0.0730023	0.0997288	0.0475485
	0.215	0.0870019	0.0971834	0.05773
	0.216	0.0640934	0.0819111	0.0704569
	0.217	0.0768203	0.0819111	0.0628207
	0.218	0.0768203	0.0691842	0.0488212
	0.219	0.0806384	0.0895472	0.0462758
	0.22	0.0691842	0.0857292	0.0590027
	0.221	0.074275	0.0870019	0.0526392
	0.222	0.0857292	0.0882745	0.0640934
	0.223	0.0590027	0.078093	0.0602754
	0.224	0.0755476	0.0831838	0.0539119
	0.225	0.0882745	0.0831838	0.0590027
	0.226	0.0717296	0.0819111	0.0628207
	0.227	0.0882745	0.0755476	0.05773
	0.228	0.0844565	0.0997288	0.0551846
	0.229	0.0679115	0.0882745	0.0564573
	0.23	0.0831838	0.0755476	0.0488212
	0.231	0.0793657	0.0882745	0.0564573
	0.232	0.0831838	0.0793657	0.0640934
	0.233	0.0717296	0.0844565	0.0488212
	0.234	0.0793657	0.0755476	0.0564573
	0.235	0.0882745	0.0819111	0.05773
	0.236	0.0679115	0.078093	0.0653661
	0.237	0.0895472	0.0882745	0.0590027
	0.238	0.0920926	0.0908199	0.0526392
	0.239	0.0717296	0.074275	0.0564573
	0.24	0.074275	0.0704569	0.0526392
	0.241	0.0806384	0.0831838	0.0602754
	0.242	0.0844565	0.0870019	0.0679115
	0.243	0.074275	0.0844565	0.0539119
	0.244	0.0908199	0.094638	0.0602754
	0.245	0.0882745	0.0691842	0.0602754
	0.246	0.074275	0.078093	0.0526392
	0.247	0.074275	0.0666388	0.074275
	0.248	0.0870019	0.078093	0.0551846
	0.249	0.0666388	0.078093	0.0704569
	0.25	0.0882745	0.0819111	0.0564573
	0.251	0.0793657	0.0844565	0.0551846
	0.252	0.0857292	0.0793657	0.0526392
	0.253	0.078093	0.0819111	0.0513665
	0.254	0.0755476	0.0768203	0.0640934
	0.255	0.0768203	0.0704569	0.0640934
	0.256	0.0730023	0.0691842	0.0704569
	0.257	0.0908199	0.0679115	0.0475485
	0.258	0.0640934	0.0704569	0.0730023
	0.259	0.0793657	0.074275	0.0691842
	0.26	0.0844565	0.0704569	0.0488212
	0.261	0.0819111	0.0857292	0.0640934
	0.262	0.0717296	0.0844565	0.0628207
	0.263	0.0819111	0.0730023	0.0564573
	0.264	0.0793657	0.0653661	0.0539119
	0.265	0.0730023	0.0640934	0.0640934
	0.266	0.0704569	0.0653661	0.0564573
	0.267	0.0844565	0.0640934	0.0628207
	0.268	0.0895472	0.0793657	0.0590027
	0.269	0.0959107	0.0590027	0.0526392
	0.27	0.0793657	0.0793657	0.0590027
	0.271	0.0793657	0.0806384	0.0564573
	0.272	0.094638	0.0602754	0.0653661
	0.273	0.074275	0.0691842	0.0526392
	0.274	0.0730023	0.0768203	0.0526392
	0.275	0.0691842	0.0819111	0.0602754
	0.276	0.0704569	0.0793657	0.0679115
	0.277	0.0793657	0.0666388	0.0653661
	0.278	0.0806384	0.0717296	0.0526392
	0.279	0.0870019	0.0819111	0.0640934
	0.28	0.078093	0.0602754	0.0679115
	0.281	0.0755476	0.0755476	0.0539119
	0.282	0.0768203	0.0666388	0.0602754
	0.283	0.0717296	0.0882745	0.0628207
	0.284	0.078093	0.0755476	0.0602754
	0.285	0.0831838	0.0793657	0.0640934
	0.286	0.0679115	0.0628207	0.0640934
	0.287	0.0793657	0.074275	0.0628207
	0.288	0.0755476	0.0691842	0.0640934
	0.289	0.0793657	0.0666388	0.0513665
	0.29	0.074275	0.0730023	0.0679115
	0.291	0.0704569	0.0717296	0.0539119
	0.292	0.0882745	0.0590027	0.0564573
	0.293	0.0755476	0.0704569	0.0640934
	0.294	0.0806384	0.0679115	0.0768203
	0.295	0.0704569	0.0717296	0.0539119
	0.296	0.0844565	0.0653661	0.0551846
	0.297	0.0870019	0.0704569	0.0590027
	0.298	0.0844565	0.0679115	0.0526392
	0.299	0.0640934	0.074275	0.0475485
	0.3	0.0717296	0.0526392	0.0640934
	0.301	0.0819111	0.0844565	0.0640934
	0.302	0.0730023	0.0679115	0.0513665
	0.303	0.0831838	0.0513665	0.0704569
	0.304	0.0844565	0.0730023	0.0335489
	0.305	0.0679115	0.0882745	0.0590027
	0.306	0.0793657	0.074275	0.0666388
	0.307	0.0755476	0.0653661	0.0590027
	0.308	0.0793657	0.0717296	0.05773
	0.309	0.0640934	0.0691842	0.0640934
	0.31	0.0526392	0.0717296	0.0590027
	0.311	0.0768203	0.0768203	0.0704569
	0.312	0.074275	0.0717296	0.0539119
	0.313	0.0768203	0.078093	0.0717296
	0.314	0.061548	0.0768203	0.0539119
	0.315	0.0691842	0.0551846	0.0462758
	0.316	0.0793657	0.0653661	0.0590027
	0.317	0.078093	0.078093	0.0399123
	0.318	0.05773	0.074275	0.05773
	0.319	0.074275	0.0653661	0.0500939
	0.32	0.0806384	0.0691842	0.0628207
	0.321	0.0666388	0.0628207	0.0437304
	0.322	0.0857292	0.0500939	0.0551846
	0.323	0.074275	0.0768203	0.0488212
	0.324	0.0768203	0.0653661	0.0564573
	0.325	0.0666388	0.0653661	0.0679115
	0.326	0.0793657	0.0628207	0.0602754
	0.327	0.074275	0.0640934	0.0437304
	0.328	0.0704569	0.0704569	0.0539119
	0.329	0.0882745	0.061548	0.0704569
	0.33	0.0806384	0.05773	0.0551846
	0.331	0.0971834	0.0640934	0.0602754
	0.332	0.10991	0.0628207	0.0564573
	0.333	0.107365	0.0730023	0.0730023
	0.334	0.130273	0.0564573	0.0730023
	0.335	0.146818	0.0666388	0.0640934
	0.336	0.150636	0.0513665	0.0920926
	0.337	0.178636	0.0653661	0.0857292
	0.338	0.174817	0.0730023	0.0844565
	0.339	0.197726	0.0679115	0.094638
	0.34	0.20918	0.074275	0.0997288
	0.341	0.207907	0.0806384	0.0984561
	0.342	0.196453	0.0819111	0.104819
	0.343	0.202817	0.0819111	0.120092
	0.344	0.204089	0.0730023	0.134091
	0.345	0.200271	0.0844565	0.140455
	0.346	0.168454	0.0806384	0.157
	0.347	0.170999	0.0844565	0.163363
	0.348	0.167181	0.0755476	0.169727
	0.349	0.169727	0.0653661	0.183726
	0.35	0.186272	0.0590027	0.178636
	0.351	0.202817	0.0602754	0.20918
	0.352	0.211725	0.0488212	0.204089
	0.353	0.224452	0.0450031	0.215543
	0.354	0.235906	0.0666388	0.234634
	0.355	0.254997	0.074275	0.232089
	0.356	0.247361	0.0844565	0.239725
	0.357	0.24227	0.103547	0.239725
	0.358	0.268997	0.127728	0.239725
	0.359	0.265178	0.150636	0.230816
	0.36	0.25627	0.172272	0.229543
	0.361	0.247361	0.182454	0.232089
	0.362	0.253724	0.206635	0.24227
	0.363	0.265178	0.220634	0.233361
	0.364	0.247361	0.218089	0.230816
	0.365	0.252451	0.226998	0.22827
	0.366	0.248633	0.220634	0.22827
	0.367	0.251179	0.238452	0.22827
	0.368	0.24227	0.238452	0.229543
	0.369	0.237179	0.239725	0.220634
	0.37	0.243543	0.253724	0.225725
	0.371	0.24227	0.238452	0.238452
	0.372	0.240997	0.247361	0.224452
	0.373	0.238452	0.243543	0.233361
	0.374	0.249906	0.232089	0.232089
	0.375	0.240997	0.243543	0.232089
	0.376	0.239725	0.233361	0.243543
	0.377	0.238452	0.247361	0.243543
	0.378	0.239725	0.214271	0.253724
	0.379	0.246088	0.232089	0.257542
	0.38	0.239725	0.220634	0.263906
	0.381	0.224452	0.226998	0.249906
	0.382	0.232089	0.225725	0.262633
	0.383	0.22827	0.196453	0.271542
	0.384	0.225725	0.22827	0.272815
	0.385	0.226998	0.220634	0.276633
	0.386	0.215543	0.221907	0.271542
	0.387	0.211725	0.219362	0.280451
	0.388	0.197726	0.229543	0.276633
	0.389	0.197726	0.238452	0.289359
	0.39	0.19009	0.233361	0.280451
	0.391	0.195181	0.216816	0.271542
	0.392	0.170999	0.22827	0.293178
	0.393	0.17609	0.224452	0.281723
	0.394	0.149364	0.230816	0.267724
	0.395	0.149364	0.226998	0.272815
	0.396	0.143	0.211725	0.272815
	0.397	0.136637	0.214271	0.263906
	0.398	0.132819	0.198998	0.26136
	0.399	0.127728	0.201544	0.260088
	0.4	0.126455	0.210453	0.262633
	0.401	0.129001	0.187544	0.260088
	0.402	0.112456	0.192635	0.246088
	0.403	0.108638	0.201544	0.238452
	0.404	0.094638	0.191362	0.225725
	0.405	0.0908199	0.193908	0.22827
	0.406	0.0984561	0.178636	0.219362
	0.407	0.0857292	0.188817	0.205362
	0.408	0.0971834	0.193908	0.214271
	0.409	0.0768203	0.188817	0.191362
	0.41	0.074275	0.186272	0.19009
	0.411	0.0691842	0.186272	0.172272
	0.412	0.0640934	0.186272	0.165909
	0.413	0.0602754	0.19009	0.150636
	0.414	0.05773	0.186272	0.154454
	0.415	0.0653661	0.188817	0.134091
	0.416	0.05773	0.179908	0.125183
	0.417	0.0424577	0.179908	0.122637
	0.418	0.0450031	0.182454	0.116274
	0.419	0.0500939	0.160818	0.113728
	0.42	0.0271854	0.178636	0.104819
	0.421	0.0233674	0.170999	0.103547
	0.422	0.0526392	0.17609	0.0997288
	0.423	0.0360943	0.174817	0.0959107
	0.424	0.0297308	0.163363	0.101001
	0.425	0.0195493	0.155727	0.0908199
	0.426	0.0310035	0.165909	0.0971834
	0.427	0.0233674	0.151909	0.078093
	0.428	0.0233674	0.159545	0.0882745
	0.429	0.0182766	0.149364	0.0870019
	0.43	0.0220947	0.150636	0.0691842
	0.431	0.000458949	0.151909	0.0908199
	0.432	0.00809509	0.143	0.0717296
	0.433	0.0106405	0.145546	0.0691842
	0.434	0.00936778	0.136637	0.0806384
	0.435	-0.0122679	0.136637	0.0793657
	0.436	0.00554971	0.137909	0.0717296
	0.437	-0.00463181	0.131546	0.0844565
	0.438	-0.00463181	0.135364	0.0882745
	0.439	-0.0109953	0.134091	0.0755476
	0.44	0.000458949	0.122637	0.0704569
	0.441	0.00173164	0.149364	0.0755476
	0.442	-0.00463181	0.136637	0.0870019
	0.443	-0.00844988	0.127728	0.0704569
	0.444	-0.00972257	0.108638	0.0806384
	0.445	-0.0135406	0.125183	0.0870019
	0.446	-0.00463181	0.12391	0.074275
	0.447	0.00300433	0.116274	0.074275
	0.448	-0.0122679	0.118819	0.0933653
	0.449	-0.0173587	0.113728	0.0691842
	0.45	-0.0173587	0.111183	0.0806384
	0.451	-0.00463181	0.113728	0.0895472
	0.452	-0.0237222	0.117546	0.078093
	0.453	-0.00844988	0.10991	0.0806384
	0.454	-0.0122679	0.102274	0.094638
	0.455	-0.0109953	0.12391	0.0857292
	0.456	-0.0109953	0.102274	0.112456
	0.457	-0.032631	0.108638	0.0933653
	0.458	-0.0059045	0.0959107	0.0933653
	0.459	-0.016086	0.104819	0.0908199
	0.46	-0.0275402	0.0997288	0.0984561
	0.461	-0.0135406	0.101001	0.0882745
	0.462	-0.00208643	0.103547	0.0933653
	0.463	-0.00844988	0.117546	0.107365
	0.464	-0.00463181	0.104819	0.0984561
	0.465	-0.0186314	0.0882745	0.0819111
	0.466	-0.0199041	0.103547	0.0882745
	0.467	0.00173164	0.0971834	0.0920926
	0.468	-0.0173587	0.111183	0.104819
	0.469	-0.0135406	0.111183	0.104819
	0.47	-0.00972257	0.102274	0.0997288
	0.471	-0.00717719	0.0984561	0.101001
	0.472	-0.00717719	0.0882745	0.0984561
	0.473	-0.00335912	0.0793657	0.104819
	0.474	-0.00335912	0.0870019	0.12391
	0.475	0.00300433	0.0819111	0.107365
	0.476	-0.00463181	0.0857292	0.121365
	0.477	0.00173164	0.0717296	0.118819
	0.478	-0.00335912	0.0628207	0.108638
	0.479	0.00936778	0.0590027	0.0984561
	0.48	-0.00208643	0.0590027	0.118819
	0.481	0.0131859	0.0437304	0.121365
	0.482	-0.00844988	0.041185	0.112456
	0.483	0.0157312	0.020822	0.117546
	0.484	0.00936778	0.0386396	0.118819
	0.485	0.00173164	0.0424577	0.125183
	0.486	-0.0109953	0.0399123	0.115001
	0.487	0.0233674	0.0144585	0.10991
	0.488	0.00427702	0.0195493	0.130273
	0.489	0.00173164	0.0233674	0.125183
	0.49	0.0068224	0.020822	0.113728
	0.491	0.00300433	0.00809509	0.122637
	0.492	0.00173164	0.00809509	0.134091
	0.493	0.00809509	0.0157312	0.117546
	0.494	-0.000813741	0.00554971	0.129001
	0.495	0.0157312	0.000458949	0.130273
	0.496	0.0131859	0.00427702	0.120092
	0.497	0.00809509	0.00300433	0.126455
	0.498	0.000458949	-0.000813741	0.125183
	0.499	0.00809509	-0.00208643	0.135364
	0.5	0.00427702	-0.000813741	0.125183
	0.501	0.00809509	0.00554971	0.125183
	0.502	-0.000813741	-0.00972257	0.144273
	0.503	-0.0059045	-0.0135406	0.143
	0.504	0.0068224	0.00300433	0.127728
	0.505	0.00809509	-0.00463181	0.139182
	0.506	0.00427702	-0.000813741	0.143
	0.507	0.0170039	-0.0186314	0.127728
	0.508	0.00936778	-0.00463181	0.125183
	0.509	0.0182766	-0.0211768	0.131546
	0.51	0.0284581	-0.0122679	0.136637
	0.511	0.0119132	-0.016086	0.137909
	0.512	0.0182766	-0.000813741	0.120092
	0.513	0.0182766	-0.0237222	0.131546
	0.514	0.0170039	-0.036449	0.148091
	0.515	0.0195493	-0.0249948	0.125183
	0.516	0.0119132	-0.0313583	0.130273
	0.517	0.0233674	-0.0249948	0.145546
	0.518	0.0170039	-0.0402671	0.139182
	0.519	0.0297308	-0.0440852	0.145546
	0.52	0.0259127	-0.0275402	0.126455
	0.521	0.0131859	-0.052994	0.145546
	0.522	0.0348216	-0.032631	0.148091
	0.523	0.0284581	-0.0377217	0.132819
	0.524	0.0144585	-0.0402671	0.150636
	0.525	0.0182766	-0.0428125	0.139182
	0.526	0.0322762	-0.036449	0.134091
	0.527	0.0310035	-0.0275402	0.135364
	0.528	0.0170039	-0.0237222	0.144273
	0.529	0.0450031	-0.0224495	0.140455
	0.53	0.0271854	-0.0313583	0.146818
	0.531	0.0386396	-0.0262675	0.144273
	0.532	0.0348216	-0.0135406	0.155727
	0.533	0.0348216	-0.0211768	0.145546
	0.534	0.0322762	-0.0275402	0.134091
	0.535	0.0399123	-0.032631	0.148091
	0.536	0.0360943	-0.032631	0.143
	0.537	0.0348216	-0.0135406	0.145546
	0.538	0.0322762	-0.0211768	0.137909
	0.539	0.0360943	-0.016086	0.140455
	0.54	0.0233674	-0.0122679	0.144273
	0.541	0.0310035	-0.0109953	0.148091
	0.542	0.0335489	-0.00844988	0.137909
	0.543	0.0335489	-0.00972257	0.150636
	0.544	0.0195493	-0.000813741	0.153182
	0.545	0.0386396	-0.00335912	0.139182
	0.546	0.037367	-0.0122679	0.143
	0.547	0.0450031	-0.00208643	0.140455
	0.548	0.0450031	-0.0109953	0.140455
	0.549	0.037367	-0.0109953	0.146818
	0.55	0.041185	-0.0148133	0.140455
	0.551	0.0399123	-0.0122679	0.131546
	0.552	0.0360943	0.00300433	0.143
	0.553	0.037367	-0.016086	0.154454
	0.554	0.0335489	0.00173164	0.149364
	0.555	0.0386396	-0.0135406	0.145546
	0.556	0.0462758	0.00809509	0.148091
	0.557	0.020822	0.00300433	0.145546
	0.558	0.0424577	-0.00463181	0.143
	0.559	0.0284581	-0.00335912	0.149364
	0.56	0.0335489	-0.0059045	0.158273
	0.561	0.0462758	0.00809509	0.141728
	0.562	0.0271854	0.0170039	0.140455
	0.563	0.0360943	-0.00844988	0.148091
	0.564	0.0259127	-0.0199041	0.129001
	0.565	0.041185	0.0233674	0.144273
	0.566	0.0284581	0.0119132	0.148091
	0.567	0.0322762	-0.00972257	0.139182
	0.568	0.0310035	0.00427702	0.149364
	0.569	0.037367	0.0119132	0.125183
	0.57	0.0335489	0.00173164	0.16209
	0.571	0.0399123	0.00809509	0.146818
	0.572	0.0284581	0.00300433	0.140455
	0.573	0.0335489	-0.00335912	0.135364
	0.574	0.0488212	0.0119132	0.135364
	0.575	0.0246401	0.00427702	0.140455
	0.576	0.0360943	0.0068224	0.141728
	0.577	0.0259127	0.00554971	0.130273
	0.578	0.0386396	0.00936778	0.139182
	0.579	0.0310035	0.0182766	0.145546
	0.58	0.0322762	0.00936778	0.137909
	0.581	0.0437304	0.0119132	0.140455
	0.582	0.0322762	0.0068224	0.141728
	0.583	0.0500939	0.0220947	0.145546
	0.584	0.0335489	0.00936778	0.132819
	0.585	0.0348216	0.0297308	0.139182
	0.586	0.0386396	0.0119132	0.144273
	0.587	0.0297308	0.0182766	0.140455
	0.588	0.0424577	0.0157312	0.141728
	0.589	0.0386396	0.0195493	0.136637
	0.59	0.0220947	0.0335489	0.143
	0.591	0.0399123	0.0195493	0.139182
	0.592	0.0437304	0.0119132	0.130273
	0.593	0.0297308	0.0335489	0.144273
	0.594	0.0310035	0.0220947	0.129001
	0.595	0.0360943	0.0259127	0.145546
	0.596	0.0195493	0.0233674	0.130273
	0.597	0.0386396	0.0271854	0.125183
	0.598	0.0564573	0.0220947	0.127728
	0.599	0.0322762	0.0144585	0.125183
	0.6	0.0360943	0.0170039	0.143
	0.601	0.0233674	0.0271854	0.131546
	0.602	0.0220947	0.0259127	0.120092
	0.603	0.0284581	0.0259127	0.130273
	0.604	0.0335489	0.0195493	0.135364
	0.605	0.0182766	0.0195493	0.140455
	0.606	0.0144585	0.0297308	0.141728
	0.607	0.00173164	0.0322762	0.135364
	0.608	0.0119132	0.0322762	0.139182
	0.609	0.00173164	0.0259127	0.127728
	0.61	0.0131859	0.041185	0.135364
	0.611	-0.00208643	0.0310035	0.143
	0.612	-0.0059045	0.0271854	0.126455
	0.613	0.00809509	0.0310035	0.137909
	0.614	0.0106405	0.0271854	0.139182
	0.615	0.00936778	0.0182766	0.130273
	0.616	-0.0122679	0.0348216	0.144273
	0.617	0.0144585	0.0322762	0.12391
	0.618	0.00300433	0.037367	0.144273
	0.619	0.0271854	0.0157312	0.129001
	0.62	0.00300433	0.0360943	0.149364
	0.621	0.0259127	0.020822	0.137909
	0.622	0.0182766	0.0284581	0.137909
	0.623	0.0144585	0.0170039	0.137909
	0.624	0.0233674	0.0220947	0.146818
	0.625	0.0170039	0.0233674	0.139182
	0.626	0.020822	0.0220947	0.122637
	0.627	0.0131859	0.0233674	0.137909
	0.628	0.0131859	0.00936778	0.143
	0.629	0.0233674	0.00427702	0.126455
	0.63	0.0170039	0.020822	0.149364
	0.631	0.0259127	0.0322762	0.127728
	0.632	0.0462758	0.0220947	0.132819
	0.633	0.0246401	0.0284581	0.136637
	0.634	0.0335489	0.0233674	0.144273
	0.635	0.0233674	0.0271854	0.130273
	0.636	0.0220947	0.0131859	0.151909
	0.637	0.0119132	0.0157312	0.136637
	0.638	0.0360943	0.0182766	0.127728
	0.639	0.0259127	0.0068224	0.134091
	0.64	0.0220947	0.0131859	0.135364
	0.641	0.0233674	0.0106405	0.144273
	0.642	0.0322762	0.0220947	0.12391
	0.643	0.0195493	0.0259127	0.130273
	0.644	0.0310035	0.0310035	0.121365
	0.645	0.0437304	0.00809509	0.129001
	0.646	0.0233674	0.0170039	0.140455
	0.647	0.0335489	0.0322762	0.132819
	0.648	0.0386396	0.0170039	0.139182
	0.649	0.0195493	0.0335489	0.116274
	0.65	0.0310035	0.0144585	0.113728
	0.651	0.0297308	0.020822	0.117546
	0.652	0.0348216	0.0157312	0.121365
	0.653	0.0271854	0.0297308	0.131546
	0.654	0.0233674	0.0195493	0.127728
	0.655	0.037367	0.0233674	0.132819
	0.656	0.0437304	0.0284581	0.132819
	0.657	0.0284581	0.0233674	0.120092
	0.658	0.041185	0.0259127	0.120092
	0.659	0.0360943	0.0233674	0.125183
	0.66	0.0297308	0.0195493	0.137909
	0.661	0.0424577	0.0220947	0.120092
	0.662	0.0310035	0.0322762	0.125183
	0.663	0.0310035	0.00809509	0.129001
	0.664	0.0475485	0.0284581	0.127728
	0.665	0.0513665	0.0322762	0.137909
	0.666	0.0310035	0.0220947	0.121365
	0.667	0.0259127	0.0284581	0.132819
	0.668	0.0399123	0.0297308	0.129001
	0.669	0.0475485	0.0310035	0.127728
	0.67	0.037367	0.0284581	0.117546
	0.671	0.041185	0.0297308	0.132819
	0.672	0.0220947	0.0310035	0.127728
	0.673	0.0437304	0.0246401	0.115001
	0.674	0.0399123	0.041185	0.117546
	0.675	0.0399123	0.0233674	0.144273
	0.676	0.0424577	0.0348216	0.121365
	0.677	0.0335489	0.0322762	0.130273
	0.678	0.041185	0.0335489	0.130273
	0.679	0.0500939	0.0360943	0.120092
	0.68	0.0360943	0.0271854	0.120092
	0.681	0.0424577	0.0310035	0.134091
	0.682	0.0348216	0.0310035	0.116274
	0.683	0.0360943	0.037367	0.125183
	0.684	0.0462758	0.0322762	0.111183
	0.685	0.0500939	0.0335489	0.129001
	0.686	0.0602754	0.0386396	0.127728
	0.687	0.0335489	0.0386396	0.125183
	0.688	0.0322762	0.0462758	0.126455
	0.689	0.0475485	0.0335489	0.118819
	0.69	0.0424577	0.0233674	0.121365
	0.691	0.0424577	0.0424577	0.120092
	0.692	0.0322762	0.037367	0.132819
	0.693	0.0271854	0.0462758	0.12391
	0.694	0.0475485	0.0475485	0.12391
	0.695	0.0526392	0.0475485	0.134091
	0.696	0.0488212	0.0360943	0.117546
	0.697	0.0488212	0.0386396	0.120092
	0.698	0.0551846	0.0322762	0.120092
	0.699	0.0297308	0.0424577	0.111183
	0.7	0.0679115	0.0399123	0.12391
	0.701	0.0526392	0.0284581	0.126455
	0.702	0.037367	0.0271854	0.127728
	0.703	0.0424577	0.0386396	0.130273
	0.704	0.0488212	0.0386396	0.130273
	0.705	0.0653661	0.0424577	0.125183
	0.706	0.0437304	0.0157312	0.115001
	0.707	0.0564573	0.0233674	0.122637
	0.708	0.0437304	0.0322762	0.121365
	0.709	0.0628207	0.0195493	0.130273
	0.71	0.037367	0.0284581	0.130273
	0.711	0.0437304	0.037367	0.127728
	0.712	0.0450031	0.041185	0.121365
	0.713	0.0640934	0.0246401	0.125183
	0.714	0.0602754	0.0297308	0.122637
	0.715	0.0539119	0.0335489	0.135364
	0.716	0.0462758	0.0271854	0.113728
	0.717	0.0500939	0.0399123	0.118819
	0.718	0.0475485	0.0220947	0.130273
	0.719	0.0564573	0.0259127	0.135364
	0.72	0.0488212	0.0386396	0.131546
	0.721	0.0424577	0.0475485	0.129001
	0.722	0.0450031	0.0348216	0.125183
	0.723	0.0539119	0.037367	0.10991
	0.724	0.0602754	0.0259127	0.130273
	0.725	0.0424577	0.041185	0.130273
	0.726	0.0386396	0.0322762	0.12391
	0.727	0.0437304	0.037367	0.135364
	0.728	0.0450031	0.0284581	0.116274
	0.729	0.05773	0.0297308	0.144273
	0.73	0.041185	0.0348216	0.12391
	0.731	0.05773	0.037367	0.130273
	0.732	0.0475485	0.0437304	0.125183
	0.733	0.0513665	0.020822	0.132819
	0.734	0.0564573	0.0259127	0.126455
	0.735	0.0551846	0.0322762	0.126455
	0.736	0.0399123	0.0437304	0.130273
	0.737	0.0475485	0.0310035	0.126455
	0.738	0.0462758	0.0335489	0.121365
	0.739	0.0424577	0.0297308	0.12391
	0.74	0.0437304	0.0246401	0.12391
	0.741	0.0564573	0.0335489	0.127728
	0.742	0.0335489	0.0246401	0.116274
	0.743	0.0539119	0.0399123	0.126455
	0.744	0.0399123	0.041185	0.125183
	0.745	0.0551846	0.0259127	0.117546
	0.746	0.0450031	0.0437304	0.130273
	0.747	0.0500939	0.0424577	0.132819
	0.748	0.0450031	0.0335489	0.121365
	0.749	0.05773	0.0360943	0.139182
	0.75	0.0437304	0.0233674	0.120092
	0.751	0.0500939	0.0437304	0.115001
	0.752	0.0551846	0.0360943	0.122637
	0.753	0.0526392	0.0170039	0.118819
	0.754	0.0475485	0.0500939	0.116274
	0.755	0.0500939	0.0271854	0.12391
	0.756	0.0488212	0.0310035	0.127728
	0.757	0.0526392	0.0259127	0.118819
	0.758	0.041185	0.0348216	0.12391
	0.759	0.0590027	0.041185	0.116274
	0.76	0.0590027	0.0386396	0.122637
	0.761	0.05773	0.0322762	0.115001
	0.762	0.0526392	0.0297308	0.131546
	0.763	0.0539119	0.0297308	0.120092
	0.764	0.0488212	0.0246401	0.130273
	0.765	0.0602754	0.0360943	0.129001
	0.766	0.0551846	0.0488212	0.107365
	0.767	0.0653661	0.037367	0.125183
	0.768	0.0526392	0.0437304	0.129001
	0.769	0.0590027	0.041185	0.113728
	0.77	0.061548	0.0424577	0.120092
	0.771	0.0691842	0.0462758	0.127728
	0.772	0.05773	0.037367	0.122637
	0.773	0.0488212	0.0284581	0.127728
	0.774	0.0640934	0.0526392	0.129001
	0.775	0.05773	0.0513665	0.125183
	0.776	0.0602754	0.0399123	0.111183
	0.777	0.0488212	0.05773	0.122637
	0.778	0.0653661	0.0513665	0.121365
	0.779	0.0526392	0.0450031	0.125183
	0.78	0.0590027	0.0450031	0.131546
	0.781	0.05773	0.0437304	0.129001
	0.782	0.05773	0.0488212	0.122637
	0.783	0.061548	0.0437304	0.116274
	0.784	0.0590027	0.0513665	0.116274
	0.785	0.0450031	0.0488212	0.115001
	0.786	0.0399123	0.0526392	0.115001
	0.787	0.061548	0.0462758	0.126455
	0.788	0.0500939	0.0513665	0.145546
	0.789	0.0500939	0.0437304	0.117546
	0.79	0.0475485	0.0386396	0.121365
	0.791	0.0437304	0.0564573	0.131546
	0.792	0.05773	0.0310035	0.126455
	0.793	0.0475485	0.0462758	0.112456
	0.794	0.061548	0.05773	0.113728
	0.795	0.0513665	0.0348216	0.126455
	0.796	0.0590027	0.0424577	0.12391
	0.797	0.0500939	0.0526392	0.127728
	0.798	0.0551846	0.037367	0.121365
	0.799	0.0526392	0.0500939	0.121365
	0.8	0.05773	0.0386396	0.120092
	0.801	0.0513665	0.0437304	0.115001
	0.802	0.0551846	-0.0822659	0.121365
	0.803	0.0564573	0.00300433	0.126455
	0.804	0.0628207	0.0297308	0.118819
	0.805	0.0513665	0.0386396	0.118819
	0.806	0.0475485	0.0500939	0.127728
	0.807	0.0640934	0.0348216	0.125183
	0.808	0.0475485	0.0437304	0.108638
	0.809	0.0424577	0.0399123	0.125183
	0.81	0.0539119	0.0526392	0.118819
	0.811	0.061548	0.0437304	0.121365
	0.812	0.037367	0.0424577	0.116274
	0.813	0.0590027	0.0386396	0.10991
	0.814	0.0488212	0.0297308	0.127728
	0.815	0.0539119	0.0310035	0.122637
	0.816	0.0450031	0.0526392	0.134091
	0.817	0.0488212	0.0488212	0.113728
	0.818	0.05773	0.037367	0.129001
	0.819	0.0602754	0.041185	0.108638
	0.82	0.0526392	0.0437304	0.127728
	0.821	0.0539119	0.0475485	0.116274
	0.822	0.05773	0.0322762	0.121365
	0.823	0.061548	0.0322762	0.118819
	0.824	0.0602754	0.0233674	0.130273
	0.825	0.0755476	0.0424577	0.130273
	0.826	0.0526392	0.0450031	0.118819
	0.827	0.0691842	0.0399123	0.115001
	0.828	0.0806384	0.0335489	0.121365
	0.829	0.0488212	0.0590027	0.125183
	0.83	0.0704569	0.0360943	0.130273
	0.831	0.0679115	0.0475485	0.120092
	0.832	0.0602754	0.0322762	0.122637
	0.833	0.0691842	0.0360943	0.122637
	0.834	0.0628207	0.0462758	0.115001
	0.835	0.0653661	0.0424577	0.130273
	0.836	0.0602754	0.0335489	0.116274
	0.837	0.0640934	0.0526392	0.122637
	0.838	0.0640934	0.037367	0.118819
	0.839	0.0513665	0.0462758	0.10991
	0.84	0.0628207	0.0348216	0.121365
	0.841	0.0717296	0.0322762	0.10991
	0.842	0.0640934	0.0386396	0.113728
	0.843	0.0564573	0.0360943	0.132819
	0.844	0.0526392	0.0488212	0.108638
	0.845	0.0551846	0.0322762	0.0997288
	0.846	0.0602754	0.037367	0.126455
	0.847	0.05773	0.0335489	0.120092
	0.848	0.0564573	0.0335489	0.108638
	0.849	0.0666388	0.0424577	0.0997288
	0.85	0.0539119	0.0500939	0.115001
	0.851	0.0602754	0.0233674	0.12391
	0.852	0.05773	0.041185	0.0997288
	0.853	0.0539119	0.0322762	0.115001
	0.854	0.0475485	0.0297308	0.10991
	0.855	0.0462758	0.0284581	0.111183
	0.856	0.0602754	0.0348216	0.117546
	0.857	0.05773	0.0399123	0.117546
	0.858	0.0526392	0.037367	0.104819
	0.859	0.0564573	0.0348216	0.107365
	0.86	0.041185	0.0424577	0.113728
	0.861	0.0450031	0.0399123	0.0984561
	0.862	0.0437304	0.0271854	0.10991
	0.863	0.0424577	0.0348216	0.118819
	0.864	0.0450031	0.0462758	0.094638
	0.865	0.0450031	0.0424577	0.113728
	0.866	0.0437304	0.0399123	0.101001
	0.867	0.0424577	0.0386396	0.10991
	0.868	0.0564573	0.0335489	0.113728
	0.869	0.037367	0.0348216	0.094638
	0.87	0.0424577	0.0284581	0.112456
	0.871	0.0475485	0.0424577	0.125183
	0.872	0.0437304	0.0233674	0.116274
	0.873	0.0386396	0.0310035	0.102274
	0.874	0.0360943	0.0322762	0.120092
	0.875	0.0539119	0.0475485	0.122637
	0.876	0.0488212	0.0424577	0.0984561
	0.877	0.0399123	0.0284581	0.0933653
	0.878	0.037367	0.041185	0.120092
	0.879	0.041185	0.0360943	0.112456
	0.88	0.041185	0.0335489	0.113728
	0.881	0.0462758	0.0360943	0.131546
	0.882	0.0437304	0.0386396	0.106092
	0.883	0.0284581	0.0475485	0.102274
	0.884	0.0360943	0.0335489	0.118819
	0.885	0.0450031	0.0386396	0.103547
	0.886	0.0348216	0.0399123	0.0984561
	0.887	0.0399123	0.0462758	0.115001
	0.888	0.0437304	0.0386396	0.103547
	0.889	0.0424577	0.0437304	0.0997288
	0.89	0.0450031	0.037367	0.126455
	0.891	0.0322762	0.0360943	0.10991
	0.892	0.037367	0.0526392	0.111183
	0.893	0.0399123	0.0539119	0.127728
	0.894	0.0488212	0.0322762	0.106092
	0.895	0.0424577	0.0233674	0.0984561
	0.896	0.0335489	0.0488212	0.117546
	0.897	0.0386396	0.0386396	0.107365
	0.898	0.0259127	0.0437304	0.101001
	0.899	0.0437304	0.0322762	0.113728
	0.9	0.037367	0.0450031	0.113728
	0.901	0.0437304	0.0386396	0.117546
	0.902	0.0297308	0.0310035	0.111183
	0.903	0.0360943	0.0488212	0.0971834
	0.904	0.0500939	0.037367	0.107365
	0.905	0.0297308	0.0386396	0.115001
	0.906	0.0475485	0.0437304	0.108638
	0.907	0.0488212	0.0437304	0.107365
	0.908	0.0386396	0.0360943	0.127728
	0.909	0.0513665	0.0551846	0.10991
	0.91	0.0513665	0.0386396	0.102274
	0.911	0.0399123	0.0348216	0.107365
	0.912	0.0768203	0.037367	0.117546
	0.913	0.0602754	0.0399123	0.10991
	0.914	0.05773	0.0437304	0.101001
	0.915	0.0424577	0.0322762	0.10991
	0.916	0.0666388	0.0360943	0.120092
	0.917	0.0628207	0.0259127	0.10991
	0.918	0.0908199	0.0259127	0.0997288
	0.919	0.061548	0.0450031	0.116274
	0.92	0.0679115	0.0259127	0.118819
	0.921	0.0590027	0.0475485	0.103547
	0.922	0.0793657	0.020822	0.130273
	0.923	0.0628207	0.0386396	0.111183
	0.924	0.0602754	0.0335489	0.118819
	0.925	0.0717296	0.0195493	0.107365
	0.926	0.0628207	0.0322762	0.113728
	0.927	0.0691842	0.041185	0.113728
	0.928	0.0602754	0.0348216	0.106092
	0.929	0.0590027	0.0360943	0.10991
	0.93	0.0793657	0.0360943	0.101001
	0.931	0.0628207	0.0488212	0.112456
	0.932	0.0691842	0.0399123	0.104819
	0.933	0.0666388	0.0348216	0.10991
	0.934	0.0666388	0.0424577	0.10991
	0.935	0.078093	0.0310035	0.121365
	0.936	0.061548	0.0271854	0.0971834
	0.937	0.0653661	0.0462758	0.115001
	0.938	0.05773	0.0437304	0.12391
	0.939	0.0590027	0.0424577	0.122637
	0.94	0.0666388	0.0424577	0.108638
	0.941	0.0513665	0.037367	0.118819
	0.942	0.0475485	0.0322762	0.118819
	0.943	0.0437304	0.0399123	0.117546
	0.944	0.0526392	0.0335489	0.102274
	0.945	0.0475485	0.0386396	0.125183
	0.946	0.0500939	0.0424577	0.108638
	0.947	0.0399123	0.0284581	0.0984561
	0.948	0.0437304	0.0475485	0.106092
	0.949	0.0348216	0.0322762	0.108638
	0.95	0.0437304	0.0246401	0.103547
	0.951	0.0475485	0.0386396	0.0984561
	0.952	0.0424577	0.0348216	0.118819
	0.953	0.0539119	0.0360943	0.116274
	0.954	0.0437304	0.0335489	0.0959107
	0.955	0.0424577	0.0360943	0.125183
	0.956	0.0437304	0.0259127	0.104819
	0.957	0.037367	0.037367	0.101001
	0.958	0.0551846	0.0475485	0.106092
	0.959	0.0488212	0.0246401	0.101001
	0.96	0.05773	0.0271854	0.10991
	0.961	0.0666388	0.0271854	0.120092
	0.962	0.0691842	0.0271854	0.108638
	0.963	0.0640934	0.0335489	0.120092
	0.964	0.0730023	0.0259127	0.103547
	0.965	0.0691842	0.037367	0.0984561
	0.966	0.0730023	0.0246401	0.104819
	0.967	0.0666388	0.0284581	0.108638
	0.968	0.0679115	0.0246401	0.0959107
	0.969	0.0755476	0.0488212	0.10991
	0.97	0.0679115	0.0310035	0.0984561
	0.971	0.0590027	0.0335489	0.108638
	0.972	0.0513665	0.0526392	0.0933653
	0.973	0.0500939	0.0424577	0.0959107
	0.974	0.0590027	0.0322762	0.125183
	0.975	0.0386396	0.05773	0.103547
	0.976	0.041185	0.0348216	0.116274
	0.977	0.0335489	0.0386396	0.112456
	0.978	0.0360943	0.0551846	0.0920926
	0.979	0.0284581	0.0500939	0.108638
	0.98	0.0233674	0.0437304	0.103547
	0.981	0.0335489	0.0284581	0.107365
	0.982	0.0322762	0.0513665	0.104819
	0.983	0.037367	0.0475485	0.107365
	0.984	0.0246401	0.0437304	0.094638
	0.985	0.0259127	0.0360943	0.0971834
	0.986	0.0297308	0.0590027	0.103547
	0.987	0.0220947	0.0424577	0.0882745
	0.988	0.0310035	0.0360943	0.101001
	0.989	0.0220947	0.0437304	0.103547
	0.99	0.041185	0.0500939	0.0984561
	0.991	0.0195493	0.041185	0.0971834
	0.992	0.0284581	0.0462758	0.0920926
	0.993	0.0348216	0.0348216	0.101001
	0.994	0.0335489	0.0386396	0.103547
	0.995	0.0297308	0.037367	0.0895472
	0.996	0.0399123	0.0475485	0.0984561
	0.997	0.0348216	0.0500939	0.0933653
	0.998	0.0399123	0.0360943	0.0971834
	0.999	0.0500939	0.0475485	0.0959107
	1	0.0424577	0.0450031	0.101001
	1.001	0.0386396	0.037367	0.0984561
	1.002	0.0424577	0.0399123	0.106092
	1.003	0.0500939	0.0386396	0.107365
	1.004	0.0450031	0.0437304	0.106092
	1.005	0.0335489	0.0424577	0.101001
	1.006	0.0399123	0.0284581	0.0997288
	1.007	0.0500939	0.037367	0.104819
	1.008	0.0437304	0.0399123	0.101001
	1.009	0.0564573	0.0475485	0.0895472
	1.01	0.0424577	0.0424577	0.104819
	1.011	0.0590027	0.0526392	0.0984561
	1.012	0.0399123	0.0335489	0.103547
	1.013	0.0437304	0.0500939	0.106092
	1.014	0.0513665	0.0360943	0.0908199
	1.015	0.0513665	0.0424577	0.0984561
	1.016	0.0437304	0.0399123	0.0959107
	1.017	0.0271854	0.0475485	0.108638
	1.018	0.0488212	0.0488212	0.0997288
	1.019	0.0386396	0.0297308	0.094638
	1.02	0.0462758	0.0310035	0.0933653
	1.021	0.0386396	0.0297308	0.106092
	1.022	0.0437304	0.0399123	0.0882745
	1.023	0.0259127	0.0360943	0.0933653
	1.024	0.0437304	0.0462758	0.113728
	1.025	0.0360943	0.0386396	0.0895472
	1.026	0.037367	0.0322762	0.0920926
	1.027	0.041185	0.0335489	0.0984561
	1.028	0.0195493	0.0271854	0.102274
	1.029	0.0233674	0.037367	0.104819
	1.03	0.037367	0.0360943	0.106092
	1.031	0.0322762	0.037367	0.103547
	1.032	0.0310035	0.0271854	0.102274
	1.033	0.0182766	0.0386396	0.0882745
	1.034	0.0131859	0.0271854	0.102274
	1.035	0.0195493	0.037367	0.107365
	1.036	0.0259127	0.0335489	0.094638
	1.037	0.0259127	0.0399123	0.113728
	1.038	0.00427702	0.0360943	0.107365
	1.039	0.0157312	0.0424577	0.102274
	1.04	0.00300433	0.0322762	0.0920926
	1.041	0.00554971	0.0386396	0.0984561
	1.042	0.0170039	0.0424577	0.0882745
	1.043	0.00809509	0.0348216	0.0997288
	1.044	-0.000813741	0.0399123	0.0997288
	1.045	0.0119132	0.0437304	0.0984561
	1.046	-0.00335912	0.0233674	0.094638
	1.047	0.00809509	0.0360943	0.106092
	1.048	0.00173164	0.0322762	0.0882745
	1.049	-0.00717719	0.0386396	0.0971834
	1.05	0.0068224	0.0399123	0.101001
	1.051	-0.00717719	0.0271854	0.0882745
	1.052	-0.0186314	0.0335489	0.0806384
	1.053	-0.0262675	0.0386396	0.0793657
	1.054	-0.036449	0.0386396	0.0831838
	1.055	-0.0186314	0.0119132	0.103547
	1.056	-0.0109953	0.0259127	0.0920926
	1.057	-0.0173587	0.0271854	0.0984561
	1.058	-0.0224495	0.037367	0.0933653
	1.059	-0.0109953	0.0310035	0.0806384
	1.06	-0.0186314	0.0259127	0.102274
	1.061	-0.0135406	0.0271854	0.0831838
	1.062	-0.00844988	0.0322762	0.0870019
	1.063	0.00300433	0.0475485	0.0831838
	1.064	-0.0148133	0.0424577	0.102274
	1.065	-0.00717719	0.0284581	0.0997288
	1.066	0.00554971	0.0297308	0.0844565
	1.067	-0.0173587	0.0424577	0.094638
	1.068	-0.0275402	0.0297308	0.0971834
	1.069	-0.0199041	0.037367	0.0870019
	1.07	-0.0249948	0.0297308	0.0882745
	1.071	-0.0122679	0.0157312	0.0971834
	1.072	-0.00972257	0.0271854	0.0933653
	1.073	-0.00717719	0.0590027	0.101001
	1.074	-0.00844988	0.0310035	0.101001
	1.075	-0.00463181	0.0182766	0.0857292
	1.076	0.00300433	0.0386396	0.0933653
	1.077	0.0119132	0.0246401	0.0920926
	1.078	0.00936778	0.020822	0.103547
	1.079	0.0195493	0.0399123	0.0870019
	1.08	0.000458949	0.0386396	0.0882745
	1.081	-0.0059045	0.0322762	0.0959107
	1.082	0.00300433	0.0386396	0.0908199
	1.083	0.0157312	0.0310035	0.0895472
	1.084	0.00300433	0.0386396	0.0895472
	1.085	0.0106405	0.041185	0.0857292
	1.086	-0.0122679	0.0182766	0.0908199
	1.087	0.0106405	0.0259127	0.0768203
	1.088	-0.00972257	0.037367	0.094638
	1.089	-0.0211768	0.0348216	0.0793657
	1.09	-0.0109953	0.0488212	0.0882745
	1.091	-0.0339037	0.0437304	0.0971834
	1.092	-0.0135406	0.0335489	0.094638
	1.093	0.00173164	0.0348216	0.0844565
	1.094	-0.0148133	0.0335489	0.0908199
	1.095	-0.0059045	0.0246401	0.0971834
	1.096	-0.0122679	0.0437304	0.0844565
	1.097	0.00809509	0.0488212	0.0971834
	1.098	0.0068224	0.0386396	0.0933653
	1.099	0.0131859	0.0386396	0.0870019
	1.1	0.0157312	0.0335489	0.0933653
	1.101	0.00554971	0.0195493	0.103547
	1.102	0.0195493	0.0360943	0.0870019
	1.103	0.0144585	0.0259127	0.0920926
	1.104	0.0220947	0.037367	0.0857292
	1.105	0.00554971	0.0297308	0.0857292
	1.106	0.0271854	0.0399123	0.0997288
	1.107	0.0233674	0.037367	0.0870019
	1.108	0.0233674	0.037367	0.0844565
	1.109	0.0246401	0.037367	0.0844565
	1.11	0.0360943	0.0271854	0.0819111
	1.111	0.0322762	0.037367	0.094638
	1.112	0.0131859	0.0450031	0.0920926
	1.113	0.0157312	0.0360943	0.0882745
	1.114	0.0233674	0.0437304	0.101001
	1.115	0.0131859	0.0348216	0.0870019
	1.116	0.0297308	0.0284581	0.0933653
	1.117	0.0170039	0.0322762	0.0640934
	1.118	0.0157312	0.041185	0.0895472
	1.119	0.0157312	0.0462758	0.0971834
	1.12	0.0310035	0.0259127	0.094638
	1.121	0.00554971	0.0399123	0.0971834
	1.122	0.0246401	0.0322762	0.0806384
	1.123	0.00300433	0.0233674	0.0831838
	1.124	0.0246401	0.0310035	0.0882745
	1.125	0.00936778	0.0475485	0.0844565
	1.126	0.0170039	0.0297308	0.0933653
	1.127	0.0195493	0.041185	0.078093
	1.128	0.0157312	0.0310035	0.0730023
	1.129	0.0182766	0.0322762	0.0933653
	1.13	0.0170039	0.0386396	0.0997288
	1.131	0.00809509	0.0284581	0.0882745
	1.132	0.0360943	0.0271854	0.0755476
	1.133	0.0170039	0.0297308	0.0895472
	1.134	0.0284581	0.0297308	0.0933653
	1.135	0.0195493	0.0271854	0.0971834
	1.136	0.0271854	0.0284581	0.074275
	1.137	0.0284581	0.0335489	0.0920926
	1.138	-0.00208643	0.0157312	0.0806384
	1.139	0.0348216	0.0310035	0.0920926
	1.14	0.0157312	0.0284581	0.0793657
	1.141	0.0335489	0.037367	0.0857292
	1.142	0.0335489	0.0322762	0.0806384
	1.143	0.0271854	0.0386396	0.0984561
	1.144	0.0297308	0.0335489	0.0895472
	1.145	0.0182766	0.0310035	0.101001
	1.146	0.0424577	0.0297308	0.0882745
	1.147	0.020822	0.0360943	0.0908199
	1.148	0.0322762	0.0386396	0.0755476
	1.149	0.0322762	0.0297308	0.0857292
	1.15	0.0462758	0.0220947	0.0857292
	1.151	0.0348216	0.0310035	0.0806384
	1.152	0.0335489	0.037367	0.0806384
	1.153	0.0335489	0.0310035	0.0831838
	1.154	0.0335489	0.0310035	0.0908199
	1.155	0.0233674	0.0297308	0.0882745
	1.156	0.0488212	0.0195493	0.0793657
	1.157	0.0462758	0.0322762	0.0806384
	1.158	0.0322762	0.0310035	0.0933653
	1.159	0.041185	0.0335489	0.0806384
	1.16	0.0424577	0.0335489	0.0895472
	1.161	0.0259127	0.0271854	0.0793657
	1.162	0.0246401	0.0322762	0.0831838
	1.163	0.0462758	0.0360943	0.0870019
	1.164	0.0500939	0.0170039	0.0857292
	1.165	0.0462758	0.0271854	0.074275
	1.166	0.0348216	0.0220947	0.0857292
	1.167	0.0335489	0.037367	0.0831838
	1.168	0.0386396	0.037367	0.0908199
	1.169	0.0450031	0.0271854	0.0793657
	1.17	0.0399123	0.0322762	0.078093
	1.171	0.0424577	0.0386396	0.0933653
	1.172	0.0360943	0.0233674	0.0920926
	1.173	0.0386396	0.0437304	0.0908199
	1.174	0.0335489	0.0360943	0.0882745
	1.175	0.0437304	0.0335489	0.0844565
	1.176	0.0297308	0.0259127	0.0895472
	1.177	0.0310035	0.0386396	0.0895472
	1.178	0.0399123	0.0322762	0.0908199
	1.179	0.0259127	0.0322762	0.101001
	1.18	0.0475485	0.0386396	0.106092
	1.181	0.0322762	0.0297308	0.078093
	1.182	0.0220947	0.0271854	0.0793657
	1.183	0.0399123	0.0437304	0.0857292
	1.184	0.0335489	0.0335489	0.0870019
	1.185	0.0399123	0.0284581	0.0857292
	1.186	0.0399123	0.0437304	0.0755476
	1.187	0.0488212	0.0322762	0.0844565
	1.188	0.037367	0.0322762	0.102274
	1.189	0.0360943	0.0335489	0.0717296
	1.19	0.0386396	0.0335489	0.0819111
	1.191	0.0399123	0.0488212	0.0844565
	1.192	0.0526392	0.0195493	0.0844565
	1.193	0.0488212	0.0348216	0.0908199
	1.194	0.0322762	0.037367	0.0895472
	1.195	0.0424577	0.0348216	0.0831838
	1.196	0.0539119	0.037367	0.094638
	1.197	0.0500939	0.0462758	0.078093
	1.198	0.0348216	0.037367	0.0984561
	1.199	0.0513665	0.0360943	0.0870019
	1.2	0.0475485	0.037367	0.0768203
	1.201	0.0437304	0.0386396	0.0831838
	1.202	0.0450031	0.0462758	0.0819111
	1.203	0.0322762	0.0424577	0.094638
	1.204	0.0475485	0.0322762	0.0908199
	1.205	0.0271854	0.0284581	0.0806384
	1.206	0.0462758	0.0424577	0.0959107
	1.207	0.0513665	0.0322762	0.078093
	1.208	0.0360943	0.0424577	0.0793657
	1.209	0.0462758	0.0335489	0.0806384
	1.21	0.0386396	0.0526392	0.0920926
	1.211	0.0488212	0.0246401	0.0755476
	1.212	0.0335489	0.037367	0.0908199
	1.213	0.037367	0.0170039	0.0870019
	1.214	0.0437304	0.0399123	0.0704569
	1.215	0.0399123	0.0386396	0.0971834
	1.216	0.0386396	0.0424577	0.0730023
	1.217	0.0539119	0.0284581	0.0844565
	1.218	0.0475485	0.0322762	0.0857292
	1.219	0.0424577	0.0424577	0.0971834
	1.22	0.0500939	0.0348216	0.0857292
	1.221	0.0526392	0.0284581	0.0920926
	1.222	0.037367	0.0259127	0.0844565
	1.223	0.0539119	0.0271854	0.0908199
	1.224	0.0475485	0.0322762	0.0895472
	1.225	0.0450031	0.0386396	0.0933653
	1.226	0.037367	0.0271854	0.0882745
	1.227	0.0539119	0.037367	0.0870019
	1.228	0.0602754	0.037367	0.0691842
	1.229	0.0462758	0.0259127	0.0844565
	1.23	0.0564573	0.0360943	0.0857292
	1.231	0.0488212	0.020822	0.0691842
	1.232	0.0462758	0.0284581	0.0908199
	1.233	0.0475485	0.0462758	0.0971834
	1.234	0.0462758	0.0284581	0.0806384
	1.235	0.0628207	0.0246401	0.0920926
	1.236	0.0500939	0.0246401	0.0933653
	1.237	0.0564573	0.0335489	0.0882745
	1.238	0.0500939	0.0220947	0.0870019
	1.239	0.0437304	0.0284581	0.0844565
	1.24	0.0602754	0.0360943	0.078093
	1.241	0.0500939	0.0322762	0.078093
	1.242	0.0602754	0.0399123	0.0704569
	1.243	0.0475485	0.0322762	0.0793657
	1.244	0.05773	0.0259127	0.0984561
	1.245	0.0590027	0.0386396	0.078093
	1.246	0.0488212	0.0284581	0.0793657
	1.247	0.0475485	0.0360943	0.0730023
	1.248	0.0462758	0.0297308	0.0882745
	1.249	0.0640934	0.0182766	0.103547
	1.25	0.0590027	0.0157312	0.0691842
	1.251	0.0488212	0.0322762	0.0831838
	1.252	0.061548	0.0271854	0.0691842
	1.253	0.0564573	0.0297308	0.0882745
	1.254	0.0475485	0.0182766	0.0806384
	1.255	0.0590027	0.0246401	0.0806384
	1.256	0.061548	0.0170039	0.0806384
	1.257	0.0475485	0.0335489	0.0882745
	1.258	0.0628207	0.0182766	0.0895472
	1.259	0.0653661	0.0475485	0.0691842
	1.26	0.0590027	0.0259127	0.0768203
	1.261	0.0488212	0.0322762	0.0819111
	1.262	0.0488212	0.0310035	0.0844565
	1.263	0.05773	0.0195493	0.0819111
	1.264	0.0539119	0.0284581	0.074275
	1.265	0.0539119	0.041185	0.078093
	1.266	0.0526392	0.020822	0.0806384
	1.267	0.0551846	0.0310035	0.0844565
	1.268	0.0602754	0.0437304	0.0768203
	1.269	0.0500939	0.0450031	0.0831838
	1.27	0.0602754	0.0170039	0.0793657
	1.271	0.0488212	0.0170039	0.0806384
	1.272	0.0602754	0.0360943	0.0870019
	1.273	0.0462758	0.00936778	0.0793657
	1.274	0.0551846	0.0335489	0.0755476
	1.275	0.0539119	0.0195493	0.0819111
	1.276	0.0526392	0.0182766	0.0819111
	1.277	0.0500939	0.0360943	0.0882745
	1.278	0.0526392	0.0284581	0.0793657
	1.279	0.0399123	0.0348216	0.0755476
	1.28	0.0462758	0.0284581	0.0870019
	1.281	0.0539119	0.0399123	0.078093
	1.282	0.0628207	0.0386396	0.0793657
	1.283	0.061548	0.0297308	0.0793657
	1.284	0.0475485	0.0348216	0.0831838
	1.285	0.05773	0.0297308	0.0768203
	1.286	0.0526392	0.0462758	0.0640934
	1.287	0.0628207	0.0322762	0.0819111
	1.288	0.0564573	0.037367	0.0895472
	1.289	0.0500939	0.0386396	0.0768203
	1.29	0.0437304	0.0348216	0.074275
	1.291	0.0564573	0.0233674	0.0704569
	1.292	0.0462758	0.0259127	0.0844565
	1.293	0.0386396	0.0284581	0.074275
	1.294	0.05773	0.0488212	0.0717296
	1.295	0.0513665	0.0360943	0.0755476
	1.296	0.0666388	0.0246401	0.0844565
	1.297	0.0462758	0.0233674	0.0730023
	1.298	0.0437304	0.0284581	0.0730023
	1.299	0.0386396	0.0297308	0.0806384
	1.3	0.0539119	0.0297308	0.0870019
	1.301	0.0462758	0.0348216	0.0882745
	1.302	0.0640934	0.0360943	0.0704569
	1.303	0.0488212	0.0322762	0.0831838
	1.304	0.0335489	0.0271854	0.0717296
	1.305	0.0539119	0.0386396	0.078093
	1.306	0.0590027	0.0259127	0.0755476
	1.307	0.0691842	0.0335489	0.0819111
	1.308	0.0322762	0.0360943	0.0602754
	1.309	0.0450031	0.0246401	0.0882745
	1.31	0.0539119	0.0259127	0.0933653
	1.311	0.0386396	0.020822	0.0831838
	1.312	0.0564573	0.0259127	0.0844565
	1.313	0.0488212	0.0322762	0.0755476
	1.314	0.0666388	0.020822	0.0679115
	1.315	0.0488212	0.0360943	0.0857292
	1.316	0.0488212	0.0259127	0.0793657
	1.317	0.0500939	0.0233674	0.0730023
	1.318	0.0628207	0.0131859	0.0806384
	1.319	0.0437304	0.0360943	0.0691842
	1.32	0.0462758	0.0399123	0.0793657
	1.321	0.0526392	0.0322762	0.0831838
	1.322	0.0513665	0.0233674	0.0730023
	1.323	0.0475485	0.0284581	0.0920926
	1.324	0.0437304	0.0157312	0.078093
	1.325	0.0666388	0.0348216	0.0908199
	1.326	0.0602754	0.0310035	0.078093
	1.327	0.05773	0.041185	0.078093
	1.328	0.0513665	0.0220947	0.074275
	1.329	0.0526392	0.0271854	0.0793657
	1.33	0.0640934	0.0246401	0.0831838
	1.331	0.0450031	0.0182766	0.0768203
	1.332	0.0564573	0.0195493	0.0844565
	1.333	0.0666388	0.0284581	0.0755476
	1.334	0.0551846	0.0271854	0.0755476
	1.335	0.0564573	0.0399123	0.074275
	1.336	0.0590027	0.0348216	0.0730023
	1.337	0.061548	0.0475485	0.0831838
	1.338	0.05773	0.0450031	0.0730023
	1.339	0.0602754	0.0424577	0.0870019
	1.34	0.0628207	0.05773	0.0819111
	1.341	0.061548	0.05773	0.078093
	1.342	0.0513665	0.0539119	0.0844565
	1.343	0.0564573	0.0590027	0.0755476
	1.344	0.0564573	0.0488212	0.074275
	1.345	0.0653661	0.0551846	0.0819111
	1.346	0.0666388	0.05773	0.0755476
	1.347	0.0590027	0.0488212	0.0628207
	1.348	0.0500939	0.0360943	0.0844565
	1.349	0.0500939	0.0628207	0.0857292
	1.35	0.0488212	0.0500939	0.0831838
	1.351	0.0590027	0.0539119	0.0819111
	1.352	0.074275	0.0335489	0.0793657
	1.353	0.0475485	0.0628207	0.0806384
	1.354	0.0500939	0.0475485	0.0640934
	1.355	0.0526392	0.037367	0.0831838
	1.356	0.0551846	0.0322762	0.0717296
	1.357	0.061548	0.0424577	0.0768203
	1.358	0.0437304	0.0475485	0.0870019
	1.359	0.0551846	0.0437304	0.0640934
	1.36	0.05773	0.0450031	0.0691842
	1.361	0.0551846	0.0322762	0.0704569
	1.362	0.0475485	0.0335489	0.0844565
	1.363	0.0602754	0.0488212	0.0819111
	1.364	0.0513665	0.0360943	0.0870019
	1.365	0.0564573	0.0284581	0.074275
	1.366	0.05773	0.0322762	0.0793657
	1.367	0.041185	0.0322762	0.0819111
	1.368	0.0564573	0.0310035	0.0806384
	1.369	0.074275	0.0284581	0.0590027
	1.37	0.0564573	0.0144585	0.0844565
	1.371	0.0488212	0.0246401	0.0844565
	1.372	0.0462758	0.0106405	0.0857292
	1.373	0.0539119	0.0170039	0.0870019
	1.374	0.0526392	0.0144585	0.0768203
	1.375	0.0602754	0.0131859	0.0730023
	1.376	0.0653661	0.0271854	0.0793657
	1.377	0.05773	0.0233674	0.0844565
	1.378	0.0602754	0.0157312	0.0717296
	1.379	0.0590027	0.0233674	0.0895472
	1.38	0.0564573	0.0271854	0.0819111
	1.381	0.0679115	0.0131859	0.0831838
	1.382	0.0640934	0.0310035	0.0831838
	1.383	0.041185	0.0322762	0.0806384
	1.384	0.0488212	0.0386396	0.078093
	1.385	0.0679115	0.037367	0.0870019
	1.386	0.0539119	0.037367	0.0819111
	1.387	0.0539119	0.0335489	0.0730023
	1.388	0.0500939	0.0322762	0.0640934
	1.389	0.0653661	0.0284581	0.0768203
	1.39	0.0488212	0.0310035	0.0819111
	1.391	0.0666388	0.0284581	0.0768203
	1.392	0.0640934	0.0182766	0.0844565
	1.393	0.0475485	0.0360943	0.0831838
	1.394	0.0513665	0.0424577	0.0768203
	1.395	0.0590027	0.0259127	0.0793657
	1.396	0.0488212	0.0322762	0.0870019
	1.397	0.0666388	0.0246401	0.0895472
	1.398	0.0628207	0.0271854	0.074275
	1.399	0.0513665	0.0360943	0.0704569
	1.4	0.05773	0.0157312	0.0691842
	1.401	0.0462758	0.0182766	0.0844565
	1.402	0.0462758	0.0386396	0.0704569
	1.403	0.0450031	0.0310035	0.0793657
	1.404	0.0488212	0.0233674	0.0730023
	1.405	0.0666388	0.0348216	0.0755476
	1.406	0.0526392	0.0462758	0.0755476
	1.407	0.0450031	0.0259127	0.0920926
	1.408	0.0500939	0.0424577	0.074275
	1.409	0.0564573	0.0322762	0.0640934
	1.41	0.061548	0.0297308	0.0844565
	1.411	0.0628207	0.0284581	0.05773
	1.412	0.0640934	0.0259127	0.0755476
	1.413	0.0564573	0.0386396	0.0882745
	1.414	0.0462758	0.0259127	0.0640934
	1.415	0.0590027	0.0297308	0.0793657
	1.416	0.0513665	0.041185	0.0691842
	1.417	0.0628207	0.0284581	0.0793657
	1.418	0.0475485	0.0284581	0.0819111
	1.419	0.0704569	0.0322762	0.0679115
	1.42	0.0488212	0.0348216	0.0895472
	1.421	0.0640934	0.0246401	0.0806384
	1.422	0.0602754	0.0271854	0.078093
	1.423	0.0653661	0.0170039	0.0704569
	1.424	0.0590027	0.0271854	0.061548
	1.425	0.0539119	0.0195493	0.0793657
	1.426	0.0590027	0.0399123	0.0730023
	1.427	0.0539119	0.0246401	0.0831838
	1.428	0.061548	0.0271854	0.0819111
	1.429	0.061548	0.0450031	0.0768203
	1.43	0.0640934	0.0170039	0.0704569
	1.431	0.0679115	0.0106405	0.0730023
	1.432	0.0386396	0.0284581	0.0806384
	1.433	0.0539119	0.0119132	0.0755476
	1.434	0.041185	0.0348216	0.0717296
	1.435	0.05773	0.0335489	0.0793657
	1.436	0.0564573	0.0284581	0.0755476
	1.437	0.078093	0.0233674	0.0857292
	1.438	0.0500939	0.0246401	0.0590027
	1.439	0.0602754	0.0233674	0.0640934
	1.44	0.0704569	0.0271854	0.0908199
	1.441	0.0717296	0.0271854	0.0730023
	1.442	0.0640934	0.0360943	0.0691842
	1.443	0.0551846	0.0335489	0.0844565
	1.444	0.05773	0.0335489	0.0628207
	1.445	0.061548	0.0297308	0.0730023
	1.446	0.061548	0.0259127	0.0793657
	1.447	0.0602754	0.0386396	0.074275
	1.448	0.0539119	0.0284581	0.0730023
	1.449	0.0653661	0.0157312	0.0666388
	1.45	0.074275	0.0271854	0.078093
	1.451	0.061548	0.0399123	0.0717296
	1.452	0.0539119	0.0119132	0.0679115
	1.453	0.0602754	0.0335489	0.0844565
	1.454	0.0488212	0.0386396	0.0730023
	1.455	0.0602754	0.0195493	0.0768203
	1.456	0.0628207	0.0271854	0.0831838
	1.457	0.0679115	0.0271854	0.0730023
	1.458	0.0564573	0.0450031	0.0717296
	1.459	0.05773	0.0271854	0.0640934
	1.46	0.0513665	0.0233674	0.0857292
	1.461	0.0526392	0.0348216	0.0679115
	1.462	0.05773	0.0220947	0.0730023
	1.463	0.05773	0.0284581	0.0602754
	1.464	0.0539119	0.0131859	0.0844565
	1.465	0.0602754	0.0360943	0.0590027
	1.466	0.0488212	0.0246401	0.0755476
	1.467	0.0717296	0.0297308	0.0857292
	1.468	0.0424577	0.0233674	0.0640934
	1.469	0.0590027	0.0348216	0.061548
	1.47	0.0717296	0.0271854	0.05773
	1.471	0.0500939	0.0246401	0.0768203
	1.472	0.0437304	0.0297308	0.0793657
	1.473	0.05773	0.0271854	0.0704569
	1.474	0.0590027	0.0259127	0.0717296
	1.475	0.0564573	0.0271854	0.0793657
	1.476	0.0590027	0.0360943	0.0602754
	1.477	0.0450031	0.0386396	0.0691842
	1.478	0.05773	0.037367	0.0717296
	1.479	0.0539119	0.0386396	0.0730023
	1.48	0.0564573	0.0233674	0.0602754
	1.481	0.0590027	0.0284581	0.0526392
	1.482	0.0653661	0.0424577	0.0513665
	1.483	0.0539119	0.0348216	0.0730023
	1.484	0.0640934	0.0182766	0.0704569
	1.485	0.0462758	0.020822	0.05773
	1.486	0.0526392	0.0246401	0.0717296
	1.487	0.0399123	0.0424577	0.0793657
	1.488	0.0691842	0.0233674	0.0793657
	1.489	0.0424577	0.0424577	0.0768203
	1.49	0.0640934	0.0297308	0.0653661
	1.491	0.0526392	0.0335489	0.0844565
	1.492	0.0462758	0.0259127	0.0819111
	1.493	0.0475485	0.0322762	0.0730023
	1.494	0.0590027	0.0297308	0.0628207
	1.495	0.0551846	0.0322762	0.0717296
	1.496	0.061548	0.0335489	0.0806384
	1.497	0.05773	0.0322762	0.0679115
	1.498	0.0475485	0.0399123	0.0666388
	1.499	0.0691842	0.0360943	0.0628207
	1.5	0.0628207	0.0284581	0.0755476
	1.501	0.0475485	0.0399123	0.0640934
	1.502	0.0551846	0.0348216	0.0691842
	1.503	0.0653661	0.0220947	0.078093
	1.504	0.05773	0.0475485	0.0717296
	1.505	0.0500939	0.0271854	0.074275
	1.506	0.0628207	0.0360943	0.0666388
	1.507	0.0539119	0.0271854	0.0590027
	1.508	0.0564573	0.0182766	0.0755476
	1.509	0.0551846	0.0259127	0.0717296
	1.51	0.0488212	0.0297308	0.05773
	1.511	0.05773	0.037367	0.0691842
	1.512	0.0399123	0.0246401	0.0640934
	1.513	0.0590027	0.0322762	0.078093
	1.514	0.0500939	0.0386396	0.0768203
	1.515	0.0437304	0.0322762	0.074275
	1.516	0.0500939	0.0322762	0.0704569
	1.517	0.0437304	0.0335489	0.0679115
	1.518	0.0564573	0.0297308	0.0564573
	1.519	0.0526392	0.020822	0.0691842
	1.52	0.0640934	0.0322762	0.0653661
	1.521	0.0551846	0.0399123	0.074275
	1.522	0.0551846	0.0297308	0.0526392
	1.523	0.061548	0.0220947	0.0793657
	1.524	0.0666388	0.0310035	0.0717296
	1.525	0.0526392	0.0437304	0.0755476
	1.526	0.0539119	0.0284581	0.0730023
	1.527	0.061548	0.0386396	0.0717296
	1.528	0.0640934	0.020822	0.0806384
	1.529	0.0551846	0.0220947	0.0653661
	1.53	0.0590027	0.0284581	0.061548
	1.531	0.0450031	0.0424577	0.0602754
	1.532	0.0704569	0.0462758	0.0691842
	1.533	0.0691842	0.0310035	0.0730023
	1.534	0.0564573	0.037367	0.0704569
	1.535	0.0666388	0.0297308	0.0691842
	1.536	0.061548	0.0182766	0.0768203
	1.537	0.0488212	0.0284581	0.0628207
	1.538	0.0640934	0.0386396	0.0679115
	1.539	0.0564573	0.0488212	0.0679115
	1.54	0.05773	0.0259127	0.078093
	1.541	0.0602754	0.0297308	0.0730023
	1.542	0.0437304	0.0348216	0.0653661
	1.543	0.0679115	0.0386396	0.0628207
	1.544	0.0475485	0.0233674	0.0717296
	1.545	0.0539119	0.0284581	0.0539119
	1.546	0.0640934	0.020822	0.0653661
	1.547	0.0628207	0.0284581	0.0691842
	1.548	0.0551846	0.0322762	0.0691842
	1.549	0.0526392	0.0271854	0.0526392
	1.55	0.0450031	0.0246401	0.0717296
	1.551	0.0551846	0.0335489	0.0628207
	1.552	0.0462758	0.0450031	0.0653661
	1.553	0.0526392	0.0335489	0.0640934
	1.554	0.0602754	0.0246401	0.061548
	1.555	0.0462758	0.0386396	0.0564573
	1.556	0.0539119	0.0360943	0.0513665
	1.557	0.041185	0.0348216	0.074275
	1.558	0.0526392	0.0297308	0.0691842
	1.559	0.05773	0.0220947	0.0704569
	1.56	0.0500939	0.020822	0.074275
	1.561	0.0653661	0.00809509	0.0526392
	1.562	0.041185	0.0424577	0.074275
	1.563	0.05773	0.0284581	0.0666388
	1.564	0.0602754	0.0157312	0.0590027
	1.565	0.0526392	0.0195493	0.0500939
	1.566	0.05773	0.0348216	0.0793657
	1.567	0.0691842	0.0386396	0.0793657
	1.568	0.0424577	0.0170039	0.0539119
	1.569	0.0539119	0.0170039	0.0679115
	1.57	0.061548	0.0322762	0.061548
	1.571	0.05773	0.0271854	0.074275
	1.572	0.05773	0.0335489	0.0717296
	1.573	0.0386396	0.037367	0.0640934
	1.574	0.0640934	0.041185	0.0730023
	1.575	0.05773	0.0386396	0.0640934
	1.576	0.0488212	0.0322762	0.0806384
	1.577	0.0691842	0.0322762	0.0806384
	1.578	0.0348216	0.0360943	0.0704569
	1.579	0.0564573	0.0335489	0.0679115
	1.58	0.0691842	0.0386396	0.0704569
	1.581	0.0666388	0.0513665	0.0526392
	1.582	0.0564573	0.0462758	0.0768203
	1.583	0.0322762	0.0322762	0.0831838
	1.584	0.0462758	0.0233674	0.05773
	1.585	0.0437304	0.037367	0.0755476
	1.586	0.0590027	0.0437304	0.0602754
	1.587	0.0475485	0.0386396	0.0602754
	1.588	0.0500939	0.037367	0.0717296
	1.589	0.0500939	0.0450031	0.0768203
	1.59	0.0679115	0.0233674	0.078093
	1.591	0.0526392	0.0424577	0.0730023
	1.592	0.05773	0.0335489	0.0602754
	1.593	0.0539119	0.0322762	0.0755476
	1.594	0.0539119	0.0322762	0.0590027
	1.595	0.0462758	0.0500939	0.074275
	1.596	0.0590027	0.0424577	0.0666388
	1.597	0.0666388	0.0322762	0.061548
	1.598	0.0462758	0.0450031	0.0768203
	1.599	0.0564573	0.0335489	0.0679115
	1.6	0.0488212	0.0399123	0.0755476
	1.601	0.0640934	0.0195493	0.0666388
	1.602	0.0679115	0.0182766	0.0793657
	1.603	0.05773	0.0335489	0.0755476
	1.604	0.0539119	0.0195493	0.0526392
	1.605	0.0399123	0.0259127	0.0755476
	1.606	0.05773	0.0513665	0.0730023
	1.607	0.0513665	0.0322762	0.0768203
	1.608	0.0437304	0.0335489	0.0691842
	1.609	0.0526392	0.041185	0.0717296
	1.61	0.0640934	0.0424577	0.0755476
	1.611	0.0526392	0.0297308	0.061548
	1.612	0.05773	0.0437304	0.0526392
	1.613	0.0475485	0.0360943	0.0691842
	1.614	0.0539119	0.0297308	0.0640934
	1.615	0.0488212	0.0322762	0.0679115
	1.616	0.0564573	0.0284581	0.0628207
	1.617	0.0564573	0.0399123	0.0666388
	1.618	0.0488212	0.0348216	0.0831838
	1.619	0.0462758	0.0220947	0.061548
	1.62	0.0450031	0.0360943	0.0526392
	1.621	0.061548	0.0284581	0.0730023
	1.622	0.0628207	0.0170039	0.074275
	1.623	0.0628207	0.0271854	0.0564573
	1.624	0.0551846	0.0246401	0.0640934
	1.625	0.05773	0.0360943	0.0628207
	1.626	0.05773	0.0271854	0.0666388
	1.627	0.0640934	0.0335489	0.0755476
	1.628	0.0640934	0.0284581	0.05773
	1.629	0.061548	0.0360943	0.0679115
	1.63	0.0602754	0.0348216	0.0717296
	1.631	0.0539119	0.0259127	0.0691842
	1.632	0.0640934	0.037367	0.074275
	1.633	0.0653661	0.0271854	0.061548
	1.634	0.0551846	0.0284581	0.0704569
	1.635	0.0640934	0.0233674	0.0768203
	1.636	0.0539119	0.0386396	0.0628207
	1.637	0.0679115	0.0386396	0.0704569
	1.638	0.0666388	0.0284581	0.0679115
	1.639	0.0564573	0.0322762	0.0793657
	1.64	0.0539119	0.0246401	0.0551846
	1.641	0.061548	0.0297308	0.0539119
	1.642	0.0526392	0.0297308	0.05773
	1.643	0.0691842	0.0220947	0.0679115
	1.644	0.0640934	0.0259127	0.0691842
	1.645	0.0551846	0.0437304	0.074275
	1.646	0.0602754	0.0144585	0.0462758
	1.647	0.0526392	0.0259127	0.0602754
	1.648	0.0590027	0.020822	0.0653661
	1.649	0.0513665	0.0399123	0.0590027
	1.65	0.0513665	0.0220947	0.061548
	1.651	0.0653661	0.0259127	0.0640934
	1.652	0.0679115	0.0271854	0.0717296
	1.653	0.0526392	0.0335489	0.0819111
	1.654	0.0640934	0.0297308	0.0679115
	1.655	0.0437304	0.0195493	0.0399123
	1.656	0.0590027	0.0310035	0.0691842
	1.657	0.0488212	0.0322762	0.0602754
	1.658	0.0424577	0.020822	0.0526392
	1.659	0.05773	0.0195493	0.0526392
	1.66	0.0590027	0.0195493	0.0462758
	1.661	0.0500939	0.0348216	0.061548
	1.662	0.0539119	0.0259127	0.0348216
	1.663	0.0564573	0.0271854	0.0526392
	1.664	0.0653661	0.0322762	0.0475485
	1.665	0.0564573	0.0500939	0.0424577
	1.666	0.0475485	0.020822	0.0500939
	1.667	0.0704569	0.0297308	0.0488212
	1.668	0.0539119	0.0475485	0.0335489
	1.669	0.0475485	0.0233674	0.0551846
	1.67	0.0488212	0.0297308	0.0513665
	1.671	0.0691842	0.0271854	0.0640934
	1.672	0.0526392	0.037367	0.0653661
	1.673	0.0488212	0.0195493	0.061548
	1.674	0.05773	0.0284581	0.05773
	1.675	0.0564573	0.0233674	0.0590027
	1.676	0.0488212	0.0322762	0.0539119
	1.677	0.05773	0.0322762	0.0602754
	1.678	0.0602754	0.0335489	0.0666388
	1.679	0.0590027	0.0157312	0.074275
	1.68	0.0475485	0.037367	0.061548
	1.681	0.05773	0.0284581	0.0437304
	1.682	0.0526392	0.0233674	0.0590027
	1.683	0.0437304	0.0386396	0.0500939
	1.684	0.0640934	0.0475485	0.0424577
	1.685	0.0526392	0.0170039	0.0488212
	1.686	0.0424577	0.0271854	0.0628207
	1.687	0.0462758	0.0335489	0.0488212
	1.688	0.0488212	0.0271854	0.05773
	1.689	0.0500939	0.0271854	0.0551846
	1.69	0.0590027	0.0271854	0.0488212
	1.691	0.0488212	0.037367	0.0462758
	1.692	0.0475485	0.0348216	0.0500939
	1.693	0.0386396	0.0348216	0.061548
	1.694	0.0513665	0.041185	0.0399123
	1.695	0.0386396	0.0322762	0.0424577
	1.696	0.0386396	0.0322762	0.0462758
	1.697	0.0640934	0.0259127	0.05773
	1.698	0.0526392	0.0310035	0.0500939
	1.699	0.05773	0.0220947	0.0590027
	1.7	0.0475485	0.020822	0.0500939
	1.701	0.0513665	0.0335489	0.0462758
	1.702	0.0564573	0.0322762	0.0590027
	1.703	0.0590027	0.0360943	0.0653661
	1.704	0.0475485	0.0322762	0.0551846
	1.705	0.0628207	0.0284581	0.0539119
	1.706	0.0500939	0.0310035	0.0704569
	1.707	0.05773	0.0131859	0.0500939
	1.708	0.0539119	0.0360943	0.05773
	1.709	0.0437304	0.0233674	0.0564573
	1.71	0.061548	0.0348216	0.0666388
	1.711	0.05773	0.0322762	0.061548
	1.712	0.0437304	0.0335489	0.0551846
	1.713	0.0526392	0.0271854	0.0590027
	1.714	0.0551846	0.041185	0.05773
	1.715	0.05773	0.0259127	0.0526392
	1.716	0.0500939	0.0322762	0.0628207
	1.717	0.0730023	0.0335489	0.0564573
	1.718	0.0590027	0.0360943	0.0526392
	1.719	0.0475485	0.0297308	0.0564573
	1.72	0.0475485	0.0335489	0.0450031
	1.721	0.0513665	0.0335489	0.0564573
	1.722	0.037367	0.0259127	0.0526392
	1.723	0.0488212	0.0271854	0.0513665
	1.724	0.0590027	0.0233674	0.0564573
	1.725	0.0360943	0.0297308	0.0628207
	1.726	0.0450031	0.0360943	0.0666388
	1.727	0.0424577	0.0348216	0.061548
	1.728	0.0450031	0.0246401	0.078093
	1.729	0.041185	0.0233674	0.0590027
	1.73	0.0513665	0.0360943	0.05773
	1.731	0.0551846	0.0259127	0.0539119
	1.732	0.0475485	0.0284581	0.0602754
	1.733	0.05773	0.0157312	0.0653661
	1.734	0.0475485	0.0348216	0.0564573
	1.735	0.0348216	0.0233674	0.05773
	1.736	0.0500939	0.0386396	0.05773
	1.737	0.0488212	0.0182766	0.0488212
	1.738	0.0590027	0.020822	0.0691842
	1.739	0.0437304	0.0322762	0.0653661
	1.74	0.0564573	0.0322762	0.0526392
	1.741	0.0590027	0.0297308	0.0450031
	1.742	0.0526392	0.0271854	0.0539119
	1.743	0.0475485	0.0360943	0.0539119
	1.744	0.0526392	0.0220947	0.041185
	1.745	0.0437304	0.0386396	0.0500939
	1.746	0.0640934	0.0233674	0.0539119
	1.747	0.0628207	0.0271854	0.0539119
	1.748	0.0500939	0.0335489	0.0437304
	1.749	0.0424577	0.0157312	0.0602754
	1.75	0.0564573	0.0310035	0.05773
	1.751	0.0475485	0.0195493	0.0488212
	1.752	0.0488212	0.0195493	0.0640934
	1.753	0.0526392	0.0233674	0.0602754
	1.754	0.0475485	0.037367	0.0551846
	1.755	0.0462758	0.0182766	0.0500939
	1.756	0.0424577	0.020822	0.0513665
	1.757	0.0475485	0.0297308	0.0602754
	1.758	0.0539119	0.0182766	0.0437304
	1.759	0.0666388	0.0284581	0.0539119
	1.76	0.0348216	0.0246401	0.0526392
	1.761	0.0399123	0.0246401	0.05773
	1.762	0.0539119	0.0284581	0.0513665
	1.763	0.0500939	0.0335489	0.0539119
	1.764	0.0564573	0.0195493	0.0488212
	1.765	0.041185	0.0399123	0.0679115
	1.766	0.0475485	0.0360943	0.0513665
	1.767	0.0488212	0.0310035	0.0450031
	1.768	0.0399123	0.0360943	0.0602754
	1.769	0.0488212	0.0259127	0.0666388
	1.77	0.0551846	0.020822	0.0628207
	1.771	0.0450031	0.037367	0.0475485
	1.772	0.0488212	0.0284581	0.0602754
	1.773	0.037367	0.0246401	0.0551846
	1.774	0.0475485	0.0259127	0.0590027
	1.775	0.0437304	0.0233674	0.0666388
	1.776	0.0475485	0.0322762	0.0551846
	1.777	0.0348216	0.0386396	0.0500939
	1.778	0.0475485	0.0335489	0.0526392
	1.779	0.0462758	0.0424577	0.0450031
	1.78	0.0500939	0.0246401	0.0500939
	1.781	0.0513665	0.0284581	0.0488212
	1.782	0.0450031	0.0360943	0.0500939
	1.783	0.0475485	0.0424577	0.05773
	1.784	0.0437304	0.0424577	0.05773
	1.785	0.0539119	0.0284581	0.05773
	1.786	0.05773	0.0284581	0.0640934
	1.787	0.0526392	0.0488212	0.0488212
	1.788	0.0488212	0.0297308	0.0513665
	1.789	0.0475485	0.0119132	0.0513665
	1.79	0.0386396	0.0348216	0.0526392
	1.791	0.0450031	0.0360943	0.0666388
	1.792	0.0284581	0.0335489	0.0653661
	1.793	0.0564573	0.037367	0.061548
	1.794	0.041185	0.0182766	0.0564573
	1.795	0.0475485	0.037367	0.0590027
	1.796	0.0526392	0.0297308	0.0462758
	1.797	0.0475485	0.0335489	0.0564573
	1.798	0.0462758	0.037367	0.0551846
	1.799	0.05773	0.0386396	0.0564573
	1.8	0.0602754	0.0322762	0.0513665
	1.801	0.0386396	0.0399123	0.0653661
	1.802	0.0526392	0.0399123	0.0526392
	1.803	0.0437304	0.0322762	0.0539119
	1.804	0.0475485	0.0310035	0.0360943
	1.805	0.0462758	0.0233674	0.0628207
	1.806	0.0526392	0.0500939	0.0450031
	1.807	0.0564573	0.0284581	0.0450031
	1.808	0.0526392	0.037367	0.05773
	1.809	0.0475485	0.0322762	0.061548
	1.81	0.0602754	0.0322762	0.0640934
	1.811	0.0513665	0.037367	0.0653661
	1.812	0.0360943	0.0271854	0.0488212
	1.813	0.0602754	0.0322762	0.0628207
	1.814	0.0399123	0.0170039	0.0628207
	1.815	0.0488212	0.0284581	0.0590027
	1.816	0.0437304	0.0360943	0.0590027
	1.817	0.037367	0.0144585	0.0551846
	1.818	0.0488212	0.0271854	0.0679115
	1.819	0.0462758	0.0233674	0.061548
	1.82	0.0437304	0.0322762	0.0564573
	1.821	0.061548	0.020822	0.0475485
	1.822	0.0500939	0.0259127	0.0640934
	1.823	0.0475485	0.0182766	0.0500939
	1.824	0.0424577	0.0335489	0.0666388
	1.825	0.0488212	0.0271854	0.0628207
	1.826	0.0450031	0.0233674	0.0526392
	1.827	0.0500939	0.0284581	0.0526392
	1.828	0.0564573	0.0259127	0.0539119
	1.829	0.0462758	0.0386396	0.0564573
	1.83	0.0500939	0.0259127	0.0500939
	1.831	0.0500939	0.037367	0.0844565
	1.832	0.0526392	0.0170039	0.0526392
	1.833	0.0488212	0.0310035	0.0640934
	1.834	0.0348216	0.0233674	0.0475485
	1.835	0.0526392	0.0348216	0.0500939
	1.836	0.0526392	0.0360943	0.0793657
	1.837	0.0475485	0.0170039	0.05773
	1.838	0.0475485	0.0297308	0.0500939
	1.839	0.0500939	0.0106405	0.0539119
	1.84	0.0628207	0.020822	0.0564573
	1.841	0.0424577	0.0233674	0.0590027
	1.842	0.0551846	0.0131859	0.0640934
	1.843	0.05773	0.0259127	0.0488212
	1.844	0.0551846	0.0360943	0.0539119
	1.845	0.0526392	0.0259127	0.05773
	1.846	0.0590027	0.0335489	0.0539119
	1.847	0.0564573	0.0322762	0.05773
	1.848	0.0564573	0.0322762	0.0666388
	1.849	0.0360943	0.0195493	0.0679115
	1.85	0.0500939	0.0386396	0.0679115
	1.851	0.0450031	0.0284581	0.061548
	1.852	0.0488212	0.0310035	0.0640934
	1.853	0.0500939	0.0233674	0.0602754
	1.854	0.0386396	0.0322762	0.0526392
	1.855	0.0386396	0.0271854	0.0602754
	1.856	0.0526392	0.0297308	0.0640934
	1.857	0.0513665	0.037367	0.0360943
	1.858	0.0539119	0.0220947	0.0564573
	1.859	0.0462758	0.0335489	0.0526392
	1.86	0.0602754	0.0284581	0.0513665
	1.861	0.0424577	0.0259127	0.0602754
	1.862	0.0386396	0.0233674	0.0539119
	1.863	0.0475485	0.0335489	0.0628207
	1.864	0.0335489	0.020822	0.0628207
	1.865	0.0462758	0.0195493	0.0590027
	1.866	0.05773	0.0182766	0.0551846
	1.867	0.0526392	0.0259127	0.0513665
	1.868	0.0488212	0.0220947	0.0564573
	1.869	0.0500939	0.0284581	0.0666388
	1.87	0.0526392	0.0284581	0.0526392
	1.871	0.0590027	0.0170039	0.05773
	1.872	0.0488212	0.0271854	0.0679115
	1.873	0.0488212	0.0335489	0.0602754
	1.874	0.0526392	0.0322762	0.0513665
	1.875	0.0488212	0.0284581	0.0488212
	1.876	0.041185	0.0360943	0.0628207
	1.877	0.0360943	0.0284581	0.0500939
	1.878	0.0513665	0.0335489	0.0679115
	1.879	0.0386396	0.0220947	0.0488212
	1.88	0.0424577	0.0386396	0.0513665
	1.881	0.0424577	0.0462758	0.061548
	1.882	0.0526392	0.0322762	0.0475485
	1.883	0.0500939	0.0360943	0.0628207
	1.884	0.0437304	0.0399123	0.0551846
	1.885	0.037367	0.0284581	0.0653661
	1.886	0.041185	0.0284581	0.0513665
	1.887	0.05773	0.0131859	0.041185
	1.888	0.0424577	0.0259127	0.0564573
	1.889	0.037367	0.0335489	0.0666388
	1.89	0.0539119	0.0259127	0.0602754
	1.891	0.0488212	0.0271854	0.0539119
	1.892	0.0488212	0.0360943	0.0551846
	1.893	0.0399123	0.0360943	0.0628207
	1.894	0.0386396	0.0259127	0.0730023
	1.895	0.0462758	0.0284581	0.0488212
	1.896	0.0691842	0.0386396	0.0602754
	1.897	0.0462758	0.0259127	0.0806384
	1.898	0.0424577	0.0310035	0.0653661
	1.899	0.0310035	0.041185	0.0679115
	1.9	0.0462758	0.0195493	0.0539119
	1.901	0.0437304	0.0322762	0.05773
	1.902	0.0564573	0.0386396	0.0539119
	1.903	0.0551846	0.0322762	0.0475485
	1.904	0.0551846	0.0297308	0.0666388
	1.905	0.0399123	0.0284581	0.0640934
	1.906	0.0437304	0.0195493	0.0564573
	1.907	0.0399123	0.0259127	0.05773
	1.908	0.05773	0.0450031	0.0551846
	1.909	0.0450031	0.0233674	0.0679115
	1.91	0.0500939	0.0220947	0.0399123
	1.911	0.0539119	0.0259127	0.0628207
	1.912	0.0551846	0.0246401	0.0704569
	1.913	0.0539119	0.0271854	0.0628207
	1.914	0.0437304	0.0195493	0.0628207
	1.915	0.0424577	0.0284581	0.0691842
	1.916	0.0590027	0.0322762	0.0640934
	1.917	0.0539119	0.0271854	0.0704569
	1.918	0.0348216	0.0322762	0.0590027
	1.919	0.0551846	0.0259127	0.0488212
	1.92	0.0462758	0.0310035	0.0500939
	1.921	0.0475485	0.0322762	0.0500939
	1.922	0.0513665	0.0335489	0.0755476
	1.923	0.0348216	0.0220947	0.0500939
	1.924	0.0551846	0.0297308	0.0704569
	1.925	0.0462758	0.0131859	0.0640934
	1.926	0.0526392	0.0271854	0.0679115
	1.927	0.0437304	0.0233674	0.0526392
	1.928	0.0450031	0.0284581	0.0424577
	1.929	0.0539119	0.0246401	0.0564573
	1.93	0.0564573	0.020822	0.0755476
	1.931	0.0526392	0.0119132	0.061548
	1.932	0.0513665	0.0310035	0.0386396
	1.933	0.0539119	0.0360943	0.0590027
	1.934	0.0462758	0.0322762	0.0564573
	1.935	0.0653661	0.0246401	0.05773
	1.936	0.0539119	0.0297308	0.0500939
	1.937	0.041185	0.0310035	0.0640934
	1.938	0.0475485	0.0335489	0.0640934
	1.939	0.0450031	0.0348216	0.0691842
	1.94	0.037367	0.0144585	0.0513665
	1.941	0.0628207	0.0271854	0.061548
	1.942	0.0513665	0.020822	0.0526392
	1.943	0.041185	0.0131859	0.0653661
	1.944	0.0424577	0.0284581	0.05773
	1.945	0.0424577	0.0360943	0.0539119
	1.946	0.0526392	0.0170039	0.0602754
	1.947	0.0450031	0.0284581	0.0513665
	1.948	0.0590027	0.0259127	0.0526392
	1.949	0.0513665	0.020822	0.0564573
	1.95	0.0462758	0.0131859	0.0475485
	1.951	0.041185	0.0310035	0.0526392
	1.952	0.0360943	0.0271854	0.0590027
	1.953	0.0424577	0.0259127	0.0462758
	1.954	0.0500939	0.0310035	0.0513665
	1.955	0.0500939	0.0284581	0.0551846
	1.956	0.0348216	0.0348216	0.061548
	1.957	0.0322762	0.0106405	0.0768203
	1.958	0.0488212	0.0386396	0.0513665
	1.959	0.041185	0.0271854	0.0513665
	1.96	0.0424577	0.0322762	0.0640934
	1.961	0.0640934	0.0157312	0.0640934
	1.962	0.0437304	0.0297308	0.0628207
	1.963	0.0539119	0.0322762	0.0602754
	1.964	0.041185	0.0348216	0.0500939
	1.965	0.0500939	0.0220947	0.0526392
	1.966	0.0475485	0.0195493	0.0666388
	1.967	0.0475485	0.0182766	0.0590027
	1.968	0.0450031	0.0297308	0.0691842
	1.969	0.0488212	0.0271854	0.0462758
	1.97	0.0628207	0.0259127	0.0539119
	1.971	0.0399123	0.00554971	0.0640934
	1.972	0.0539119	0.0310035	0.05773
	1.973	0.037367	0.0170039	0.0526392
	1.974	0.0462758	0.041185	0.0437304
	1.975	0.0450031	0.0335489	0.0666388
	1.976	0.0437304	0.0233674	0.0628207
	1.977	0.0462758	0.0259127	0.061548
	1.978	0.0513665	0.0195493	0.0666388
	1.979	0.0424577	0.041185	0.0590027
	1.98	0.0564573	0.0220947	0.0526392
	1.981	0.0462758	0.0348216	0.0488212
	1.982	0.0437304	0.0424577	0.0488212
	1.983	0.0462758	0.0271854	0.0628207
	1.984	0.05773	0.0437304	0.0590027
	1.985	0.0450031	0.0259127	0.0640934
	1.986	0.0602754	0.00936778	0.0590027
	1.987	0.0500939	0.0297308	0.0526392
	1.988	0.0462758	0.0335489	0.05773
	1.989	0.0488212	0.0195493	0.0539119
	1.99	0.0348216	0.0322762	0.0666388
	1.991	0.0500939	0.0284581	0.0399123
	1.992	0.0526392	0.0284581	0.0526392
	1.993	0.0462758	0.0233674	0.0602754
	1.994	0.0399123	0.0348216	0.0539119
	1.995	0.0475485	0.0437304	0.0513665
	1.996	0.0437304	0.0322762	0.0475485
	1.997	0.0437304	0.0182766	0.0450031
	1.998	0.0297308	0.020822	0.0513665
[truncated: 4,001 more rows]
