# Supplementary material for: Crystal structures of bacterial small multidrug resistance transporter EmrE in complex with structurally diverse substrates
Source: eLife. 2022 Mar 7;11:e76766. doi: 10.7554/eLife.76766 (PMC9000954; doi:10.7554/eLife.76766)
Supplement: Figure 1—source data 5. [file elife-76766-fig1-data5.xlsx]

## Sheet: Sheet1
no L10 (1) (nA)	with 10 uM L10 (1) (nA)	no L10 (2) (nA)
0.278	0.142	0.29
0.249	0.142	0.278
0.221	0.158	0.308
