# Supplementary material for: Crystal structures of bacterial small multidrug resistance transporter EmrE in complex with structurally diverse substrates
Source: eLife. 2022 Mar 7;11:e76766. doi: 10.7554/eLife.76766 (PMC9000954; doi:10.7554/eLife.76766)
Supplement: Figure 1—source data 6. [file elife-76766-fig1-data6.xlsx]

## Sheet: Sheet1
	EmrE3				EmrE WT
TPA	0.3697	0.4296	0.6656	0.4693	0.2537	0.1648	0.2897	0.3707
Phegdm+	0.5817	0.2951	0.8801	0.858	1.031	0.8733
