# Supplementary material for: Crystal structures of bacterial small multidrug resistance transporter EmrE in complex with structurally diverse substrates
Source: eLife. 2022 Mar 7;11:e76766. doi: 10.7554/eLife.76766 (PMC9000954; doi:10.7554/eLife.76766)
Supplement: Figure 5—source data 1. [file elife-76766-fig5-data1.xlsx]

## Sheet: Sheet1
		A									A									A
EmrE3 S43A	Time (sec)	TPA	Phe	TPA	Phe	TPA	Phe		EmrE3 W63F	Time (sec)	TPA	Phe	TPA	Phe	TPA	Phe		EmrE3 Y60F	Time (sec)	TPA	Phe	TPA	Phe	TPA	Phe		EmrE3 WT	Time (sec)	TPA	Phegdm	TPA	Phe	TPA	Phe		Gdx-Clo WT	Time (sec)	Gdm+	Gdm+	Gdm+		Gdx-Clo Y59F	Time (sec)	Gdm+	Gdm+	Gdm+		Gdx-Clo S42A	Time (sec)
	0	-0.0759024	-0.069539	-0.185354	-0.0351764	-0.142082	-0.0377217			0	0.0462758	0.0335489	0.0195493	0.0271854	0.00300433	-0.0224495			0	0.00427702	0.103547	0.0220947	0.0195493	0.103547	0.0691842			0	0.00427702	0.103547	0.00173164	-0.00208643	-0.0173587	0.00300433			0	0.205362	0.113728	0.0933653			0	0.115	0.15955	0.79334			0
	0.001	-0.0873566	-0.0631755	-0.181536	-0.0389944	-0.156082	-0.0275402			0.001	0.0348216	0.0271854	0.0297308	0.0131859	-0.00972257	-0.00463181			0.001	0.0144585	0.101001	0.0271854	0.0220947	0.0895472	0.0730023			0.001	0.0144585	0.101001	-0.016086	-0.00844988	-0.000813741	-0.00335912			0.001	0.221907	0.111183	0.121365			0.001	0.09464	0.11627	0.76916			0.001
	0.002	-0.0759024	-0.0708117	-0.171354	-0.0428125	-0.144628	-0.0428125			0.002	0.0539119	0.0182766	0.0233674	0.0157312	0.0170039	0.00173164			0.002	0.0170039	0.10991	-0.000813741	0.0233674	0.0997288	0.0488212			0.002	0.0170039	0.10991	0.00300433	-0.00208643	0.0106405	-0.0135406			0.002	0.226998	0.102274	0.125183			0.002	0.10227	0.09337	0.78953			0.002
	0.003	-0.0911747	-0.0593575	-0.171354	-0.036449	-0.136991	-0.0389944			0.003	0.0437304	0.0322762	0.0182766	0.0335489	-0.00208643	-0.00972257			0.003	0.00809509	0.107365	0.0157312	0.00809509	0.0959107	0.0386396			0.003	0.00809509	0.107365	-0.00717719	0.0106405	0.00809509	-0.0059045			0.003	0.211725	0.121365	0.103547			0.003	0.09846	0.10736	0.75135			0.003
	0.004	-0.0911747	-0.0606302	-0.17899	-0.0555394	-0.14081	-0.0479033			0.004	0.0424577	0.0310035	0.0119132	0.0182766	0.000458949	-0.00335912			0.004	0.00300433	0.0870019	0.0246401	0.0195493	0.0997288	0.00936778			0.004	0.00300433	0.0870019	0.00936778	0.00809509	-0.00208643	0.00427702			0.004	0.212998	0.118819	0.0997288			0.004	0.09464	0.06155	0.75516			0.004
	0.005	-0.073357	-0.0708117	-0.176445	-0.049176	-0.144628	-0.0313583			0.005	0.0437304	0.0297308	0.0271854	0.00809509	-0.00463181	-0.0135406			0.005	0.0119132	0.094638	0.0195493	0.0195493	0.101001	0.0131859			0.005	0.0119132	0.094638	0.00809509	-0.00208643	-0.00844988	0.0106405			0.005	0.20918	0.116274	0.112456			0.005	0.07937	0.09082	0.67498			0.005
	0.006	-0.0911747	-0.073357	-0.176445	-0.0377217	-0.150991	-0.0389944			0.006	0.0450031	0.0259127	0.0157312	0.00554971	0.0144585	0.00427702			0.006	0.0182766	0.10991	0.0157312	0.0182766	0.104819	-0.0059045			0.006	0.0182766	0.10991	0.00809509	0.0144585	-0.00844988	0.00427702			0.006	0.211725	0.10991	0.104819			0.006	0.08573	0.07046	0.62026			0.006
	0.007	-0.0886293	-0.0593575	-0.176445	-0.0389944	-0.147173	-0.0389944			0.007	0.0399123	0.0271854	0.0246401	0.0220947	0.00809509	-0.00335912			0.007	-0.00208643	0.10991	0.00936778	0.0068224	0.094638	0.00300433			0.007	-0.00208643	0.10991	-0.0224495	0.000458949	0.000458949	0.000458949			0.007	0.20918	0.115001	0.107365			0.007	0.06409	0.05264	0.58844			0.007
	0.008	-0.0822659	-0.0720844	-0.1739	-0.0402671	-0.144628	-0.0288129			0.008	0.037367	0.0284581	0.0195493	0.0246401	0.0068224	-0.00208643			0.008	0.0119132	0.106092	0.0068224	0.00300433	0.0933653	-0.0237222			0.008	0.0119132	0.106092	-0.00208643	-0.0109953	-0.00463181	-0.0122679			0.008	0.202817	0.116274	0.113728			0.008	0.07682	0.04119	0.57699			0.008
	0.009	-0.0809932	-0.0708117	-0.167536	-0.0389944	-0.134446	-0.0377217			0.009	0.0360943	0.0322762	0.0360943	0.0233674	-0.00463181	-0.000813741			0.009	0.00427702	0.103547	0.0297308	0.00554971	0.102274	-0.0224495			0.009	0.00427702	0.103547	-0.0173587	0.00173164	-0.00208643	-0.00208643			0.009	0.20918	0.0997288	0.10991			0.009	0.08064	0.06664	0.57826			0.009
	0.01	-0.0873566	-0.0568121	-0.172627	-0.0619029	-0.136991	-0.0415398			0.01	0.0475485	0.0348216	0.020822	0.0195493	-0.00463181	-0.00717719			0.01	0.00936778	0.104819	0.0170039	0.0157312	0.103547	0.0119132			0.01	0.00936778	0.104819	-0.00717719	0.0220947	-0.0122679	0.000458949			0.01	0.212998	0.120092	0.102274			0.01	0.06537	0.11755	0.5859			0.01
	0.011	-0.0886293	-0.0580848	-0.180263	-0.0402671	-0.138264	-0.0555394			0.011	0.05773	0.0259127	0.0195493	0.0182766	0.0119132	-0.0211768			0.011	0.00173164	0.102274	0.0195493	0.0157312	0.0959107	-0.00208643			0.011	0.00173164	0.102274	0.00173164	-0.00463181	-0.0122679	-0.00335912			0.011	0.202817	0.113728	0.0933653			0.011	0.06282	0.13791	0.6139			0.011
	0.012	-0.0924474	-0.0619029	-0.177718	-0.032631	-0.144628	-0.0453579			0.012	0.0500939	0.0195493	0.0322762	0.0259127	-0.00208643	-0.016086			0.012	0.00936778	0.103547	0.00300433	0.0131859	0.0831838	-0.00208643			0.012	0.00936778	0.103547	0.0106405	0.0068224	-0.0109953	-0.00717719			0.012	0.219362	0.104819	0.0933653			0.012	0.06791	0.15445	0.64062			0.012
	0.013	-0.0848113	-0.0504486	-0.170081	-0.036449	-0.147173	-0.0288129			0.013	0.0386396	0.0310035	0.00809509	0.0144585	0.00809509	-0.00463181			0.013	0.0119132	0.112456	0.0310035	-0.000813741	0.094638	0.00300433			0.013	0.0119132	0.112456	0.0068224	-0.00208643	0.00173164	-0.00208643			0.013	0.214271	0.122637	0.10991			0.013	0.07173	0.16336	0.71571			0.013
	0.014	-0.0822659	-0.0708117	-0.163718	-0.0466306	-0.134446	-0.0453579			0.014	0.0488212	0.0233674	0.0233674	0.0144585	0.0170039	-0.0059045			0.014	0.00936778	0.104819	0.0170039	0.0119132	0.113728	0.00300433			0.014	0.00936778	0.104819	-0.000813741	-0.00463181	-0.00972257	-0.00844988			0.014	0.219362	0.0971834	0.10991			0.014	0.073	0.17354	0.71953			0.014
	0.015	-0.0886293	-0.0542667	-0.180263	-0.036449	-0.138264	-0.0402671			0.015	0.0424577	0.020822	0.0195493	0.0195493	0.0119132	-0.0109953			0.015	0.00554971	0.0895472	0.0144585	0.0068224	0.103547	-0.00717719			0.015	0.00554971	0.0895472	0.00554971	0.00173164	0.000458949	-0.0059045			0.015	0.215543	0.113728	0.108638			0.015	0.08318	0.19518	0.77171			0.015
	0.016	-0.0809932	-0.0580848	-0.172627	-0.0389944	-0.139537	-0.0377217			0.016	0.0399123	0.020822	0.0310035	0.0119132	0.00300433	0.00554971			0.016	0.00173164	0.125183	0.0259127	0.0119132	0.104819	-0.00844988			0.016	0.00173164	0.125183	-0.0109953	0.0119132	0.00936778	-0.00717719			0.016	0.210453	0.116274	0.101001			0.016	0.06409	0.14936	0.77425			0.016
	0.017	-0.0809932	-0.0682663	-0.1739	-0.0479033	-0.1459	-0.0453579			0.017	0.0424577	0.0271854	0.00554971	0.0233674	-0.00208643	-0.0224495			0.017	0.0157312	0.0971834	0.0106405	0.0119132	0.103547	-0.0122679			0.017	0.0157312	0.0971834	-0.0135406	-0.00335912	-0.00208643	0.0119132			0.017	0.211725	0.127728	0.102274			0.017	0.05264	0.12136	0.78698			0.017
	0.018	-0.0937201	-0.0568121	-0.171354	-0.0453579	-0.14081	-0.0339037			0.018	0.0437304	0.0284581	0.0271854	0.0271854	0.00936778	-0.0059045			0.018	-0.000813741	0.094638	0.0182766	-0.000813741	0.0831838	-0.00844988			0.018	-0.000813741	0.094638	0.00809509	-0.0059045	-0.000813741	-0.00335912			0.018	0.220634	0.0997288	0.115001			0.018	0.07937	0.06537	0.81371			0.018
	0.019	-0.069539	-0.0593575	-0.172627	-0.0377217	-0.135719	-0.0542667			0.019	0.0437304	0.0297308	0.0335489	0.00809509	0.0131859	0.00173164			0.019	0.00936778	0.106092	0.000458949	0.0182766	0.10991	-0.0122679			0.019	0.00936778	0.106092	-0.0059045	-0.00844988	-0.0109953	-0.00972257			0.019	0.22318	0.112456	0.104819			0.019	0.073	0.05518	0.77298			0.019
	0.02	-0.0797205	-0.0606302	-0.163718	-0.0428125	-0.148446	-0.0377217			0.02	0.0475485	0.0297308	0.0220947	0.0119132	0.00809509	-0.00208643			0.02	0.00427702	0.104819	0.0220947	0.0119132	0.0997288	0.0131859			0.02	0.00427702	0.104819	-0.00717719	0.00554971	0.00300433	-0.0122679			0.02	0.225725	0.113728	0.102274			0.02	0.07809	0.04246	0.78062			0.02
	0.021	-0.086084	-0.0682663	-0.180263	-0.0466306	-0.135719	-0.0339037			0.021	0.0386396	0.0195493	0.0144585	0.0233674	-0.000813741	-0.00208643			0.021	0.0106405	0.10991	0.0233674	-0.00335912	0.0920926	0.0068224			0.021	0.0106405	0.10991	0.00173164	0.0106405	-0.000813741	-0.0173587			0.021	0.214271	0.10991	0.103547			0.021	0.07682	0.02846	0.75771			0.021
	0.022	-0.0835386	-0.0580848	-0.176445	-0.032631	-0.144628	-0.0339037			0.022	0.0513665	0.0233674	0.0310035	0.0144585	-0.00972257	-0.00463181			0.022	-0.000813741	0.106092	0.0119132	0.00554971	0.0908199	0.00554971			0.022	-0.000813741	0.106092	0.0144585	0.00173164	0.00173164	0.00936778			0.022	0.207907	0.116274	0.0882745			0.022	0.087	0.04882	0.7208			0.022
	0.023	-0.0949928	-0.0682663	-0.175172	-0.0351764	-0.12681	-0.0517213			0.023	0.0437304	0.0322762	0.0284581	0.0119132	-0.00844988	0.000458949			0.023	0.0119132	0.125183	0.0144585	0.00809509	0.0882745	0.0144585			0.023	0.0119132	0.125183	-0.0148133	0.0106405	0.0068224	0.00554971			0.023	0.202817	0.104819	0.0959107			0.023	0.07173	0.04373	0.67498			0.023
	0.024	-0.089902	-0.0682663	-0.180263	-0.032631	-0.129355	-0.0428125			0.024	0.0335489	0.0233674	0.0271854	0.00809509	0.00936778	-0.0186314			0.024	-0.000813741	0.0971834	0.0106405	0.00427702	0.103547	0.0259127			0.024	-0.000813741	0.0971834	0.00300433	-0.0059045	-0.00972257	-0.0148133			0.024	0.205362	0.101001	0.0997288			0.024	0.08955	0.08955	0.68135			0.024
	0.025	-0.0797205	-0.0568121	-0.1599	-0.0377217	-0.144628	-0.0466306			0.025	0.0475485	0.0348216	0.0233674	0.0259127	-0.000813741	-0.00717719			0.025	0.0271854	0.0920926	0.0157312	0.0182766	0.0984561	0.0322762			0.025	0.0271854	0.0920926	0.00936778	-0.0109953	-0.00717719	-0.0059045			0.025	0.219362	0.107365	0.0997288			0.025	0.087	0.11627	0.6788			0.025
	0.026	-0.089902	-0.0568121	-0.175172	-0.0479033	-0.148446	-0.0224495			0.026	0.0488212	0.0259127	0.0322762	0.00809509	0.0119132	-0.000813741			0.026	0.00300433	0.106092	0.0157312	0.0220947	0.0933653	0.0246401			0.026	0.00300433	0.106092	0.0157312	0.000458949	-0.0122679	0.00300433			0.026	0.225725	0.117546	0.0933653			0.026	0.07937	0.15955	0.7068			0.026
	0.027	-0.086084	-0.0631755	-0.177718	-0.0313583	-0.14081	-0.0237222			0.027	0.0424577	0.0271854	0.0170039	0.00936778	0.0170039	-0.0173587			0.027	0.0119132	0.094638	0.0131859	0.00173164	0.0831838	0.0335489			0.027	0.0119132	0.094638	-0.00335912	0.0119132	-0.00335912	-0.00463181			0.027	0.225725	0.107365	0.112456			0.027	0.09718	0.18627	0.69026			0.027
	0.028	-0.0911747	-0.0682663	-0.185354	-0.0351764	-0.143355	-0.052994			0.028	0.041185	0.0284581	0.0310035	0.0259127	-0.0148133	-0.00463181			0.028	0.00554971	0.101001	0.0144585	0.00300433	0.0908199	0.0335489			0.028	0.00554971	0.101001	-0.0135406	0.00427702	0.00936778	-0.000813741			0.028	0.204089	0.094638	0.0933653			0.028	0.10482	0.23209	0.7488			0.028
	0.029	-0.089902	-0.0504486	-0.171354	-0.0402671	-0.142082	-0.0339037			0.029	0.0450031	0.0246401	0.0220947	0.0144585	0.000458949	0.00300433			0.029	-0.0109953	0.101001	0.0271854	0.0157312	0.10991	0.0348216			0.029	-0.0109953	0.101001	-0.0109953	0.0131859	0.00809509	-0.00335912			0.029	0.219362	0.10991	0.0997288			0.029	0.09464	0.23336	0.73607			0.029
	0.03	-0.086084	-0.0720844	-0.167536	-0.0339037	-0.139537	-0.0249948			0.03	0.0475485	0.0246401	0.0182766	0.0182766	0.00809509	0.00300433			0.03	0.00300433	0.120092	0.0157312	0.0068224	0.0984561	0.0144585			0.03	0.00300433	0.120092	0.0106405	-0.00844988	-0.00717719	0.00427702			0.03	0.214271	0.127728	0.0857292			0.03	0.09337	0.24354	0.75898			0.03
	0.031	-0.0822659	-0.049176	-0.1739	-0.0504486	-0.138264	-0.0300856			0.031	0.0590027	0.0246401	0.0170039	0.0170039	0.00809509	-0.000813741			0.031	0.0144585	0.106092	0.0131859	0.00173164	0.104819	0.0195493			0.031	0.0144585	0.106092	-0.00335912	0.00427702	-0.00208643	-0.00208643			0.031	0.219362	0.113728	0.111183			0.031	0.08446	0.26518	0.80225			0.031
	0.032	-0.069539	-0.0606302	-0.170081	-0.0351764	-0.14081	-0.0377217			0.032	0.0424577	0.020822	0.0322762	0.0157312	0.0233674	-0.0135406			0.032	0.0131859	0.0997288	0.00936778	0.00554971	0.0959107	0.00809509			0.032	0.0131859	0.0997288	0.000458949	0.0144585	0.00554971	-0.0059045			0.032	0.22318	0.108638	0.0984561			0.032	0.09209	0.24991	0.81625			0.032
	0.033	-0.0975382	-0.0593575	-0.162445	-0.0517213	-0.12681	-0.0288129			0.033	0.0360943	0.0233674	0.0310035	0.0068224	0.00427702	0.00427702			0.033	0.0233674	0.108638	0.0119132	0.0144585	0.0997288	0.00936778			0.033	0.0233674	0.108638	0.00427702	0.00300433	-0.0122679	-0.0109953			0.033	0.211725	0.120092	0.102274			0.033	0.08318	0.20663	0.82516			0.033
	0.034	-0.110265	-0.0580848	-0.162445	-0.0351764	-0.131901	-0.0453579			0.034	0.0424577	0.0360943	0.0220947	0.0119132	0.00300433	0.00300433			0.034	0.0068224	0.112456	0.0259127	0.0170039	0.094638	0.000458949			0.034	0.0068224	0.112456	-0.000813741	-0.00844988	0.0170039	0.00809509			0.034	0.221907	0.10991	0.116274			0.034	0.08064	0.15955	0.84043			0.034
	0.035	-0.0949928	-0.0542667	-0.187899	-0.0389944	-0.128083	-0.049176			0.035	0.0475485	0.0271854	0.0233674	0.0246401	0.0119132	-0.0122679			0.035	0.0131859	0.0997288	0.0170039	-0.00463181	0.0959107	0.0119132			0.035	0.0131859	0.0997288	0.0106405	0.0170039	-0.00844988	-0.00463181			0.035	0.232089	0.120092	0.0933653			0.035	0.07809	0.12773	0.81625			0.035
	0.036	-0.0873566	-0.0555394	-0.171354	-0.0415398	-0.135719	-0.0555394			0.036	0.0462758	0.0259127	0.0220947	0.0220947	0.0106405	-0.0122679			0.036	-0.000813741	0.0984561	0.0182766	0.0131859	0.0997288	0.00554971			0.036	-0.000813741	0.0984561	-0.00208643	0.00809509	-0.00335912	-0.00208643			0.036	0.216816	0.111183	0.10991			0.036	0.05646	0.10355	0.81753			0.036
	0.037	-0.0809932	-0.0517213	-0.1739	-0.0479033	-0.138264	-0.0389944			0.037	0.0450031	0.0310035	0.0195493	0.00936778	0.00300433	0.0157312			0.037	0.0119132	0.103547	0.0144585	0.0144585	0.0997288	-0.00335912			0.037	0.0119132	0.103547	-0.0199041	0.0157312	-0.00844988	-0.000813741			0.037	0.211725	0.107365	0.108638			0.037	0.08827	0.09846	0.8188			0.037
	0.038	-0.0746297	-0.0606302	-0.177718	-0.0428125	-0.144628	-0.0351764			0.038	0.0437304	0.0348216	0.0233674	0.0271854	-0.00335912	-0.0288129			0.038	0.00809509	0.0984561	0.0119132	0.0157312	0.0971834	0.00300433			0.038	0.00809509	0.0984561	0.00936778	-0.00463181	-0.000813741	-0.00972257			0.038	0.221907	0.10991	0.0997288			0.038	0.07427	0.10864	0.76662			0.038
	0.039	-0.0822659	-0.0542667	-0.168809	-0.0249948	-0.134446	-0.0428125			0.039	0.0437304	0.0246401	0.0297308	0.0106405	0.00554971	-0.00972257			0.039	0.0144585	0.115001	0.0246401	-0.000813741	0.094638	0.00300433			0.039	0.0144585	0.115001	-0.000813741	-0.0059045	0.0119132	-0.00208643			0.039	0.200271	0.103547	0.10991			0.039	0.07809	0.12391	0.74371			0.039
	0.04	-0.0771751	-0.0453579	-0.184081	-0.0377217	-0.134446	-0.0377217			0.04	0.0386396	0.0220947	0.0246401	0.0322762	0.0106405	-0.000813741			0.04	-0.00335912	0.106092	0.0170039	0.000458949	0.104819	0.0131859			0.04	-0.00335912	0.106092	0.00427702	-0.000813741	0.000458949	0.00173164			0.04	0.200271	0.10991	0.102274			0.04	0.06918	0.14045	0.7208			0.04
	0.041	-0.0822659	-0.0593575	-0.1599	-0.0517213	-0.14081	-0.0300856			0.041	0.0475485	0.0220947	0.0233674	0.0220947	0.00936778	-0.0211768			0.041	0.0157312	0.103547	0.0157312	0.0170039	0.0882745	0.0131859			0.041	0.0157312	0.103547	-0.00335912	0.00809509	-0.00335912	-0.0135406			0.041	0.210453	0.0997288	0.111183			0.041	0.06409	0.143	0.68008			0.041
	0.042	-0.0809932	-0.0542667	-0.186626	-0.0466306	-0.136991	-0.0479033			0.042	0.0462758	0.0144585	0.0195493	0.0119132	-0.00463181	-0.00463181			0.042	0.0106405	0.0997288	0.0182766	0.0144585	0.0984561	0.0220947			0.042	0.0106405	0.0997288	0.00300433	-0.00208643	0.00554971	0.00173164			0.042	0.207907	0.111183	0.106092			0.042	0.07937	0.185	0.67244			0.042
	0.043	-0.0962655	-0.0631755	-0.167536	-0.0415398	-0.149718	-0.0339037			0.043	0.0488212	0.037367	0.0297308	0.0106405	0.0068224	-0.0122679			0.043	0.00300433	0.120092	0.020822	0.00554971	0.0933653	0.0195493			0.043	0.00300433	0.120092	0.00554971	0.00809509	-0.0148133	-0.00844988			0.043	0.202817	0.0971834	0.111183			0.043	0.07046	0.20663	0.69026			0.043
	0.044	-0.0797205	-0.069539	-0.164991	-0.0389944	-0.139537	-0.0428125			0.044	0.0462758	0.0233674	0.0182766	0.0271854	-0.000813741	-0.0059045			0.044	0.00809509	0.107365	0.0170039	0.00809509	0.0959107	0.0144585			0.044	0.00809509	0.107365	0.00936778	0.0131859	0.0170039	-0.00335912			0.044	0.225725	0.113728	0.104819			0.044	0.07809	0.24227	0.69153			0.044
	0.045	-0.089902	-0.0555394	-0.1739	-0.032631	-0.143355	-0.0428125			0.045	0.0462758	0.0284581	0.0310035	-0.00463181	-0.000813741	0.00809509			0.045	-0.00208643	0.102274	0.0170039	0.0259127	0.0997288	0.0195493			0.045	-0.00208643	0.102274	-0.0122679	0.0106405	0.00300433	-0.00208643			0.045	0.215543	0.132819	0.101001			0.045	0.06028	0.255	0.71571			0.045
	0.046	-0.0886293	-0.0580848	-0.171354	-0.052994	-0.156082	-0.049176			0.046	0.0399123	0.0310035	0.0131859	0.0233674	0.00936778	0.000458949			0.046	0.00936778	0.103547	0.0106405	0.0195493	0.0831838	0.0131859			0.046	0.00936778	0.103547	-0.00463181	0.00173164	-0.016086	-0.00972257			0.046	0.210453	0.0984561	0.111183			0.046	0.07682	0.27791	0.73989			0.046
	0.047	-0.0962655	-0.0593575	-0.181536	-0.0440852	-0.124265	-0.0211768			0.047	0.0437304	0.0284581	0.0182766	0.0170039	0.00300433	-0.016086			0.047	-0.00208643	0.0882745	0.020822	0.00300433	0.101001	0.020822			0.047	-0.00208643	0.0882745	0.000458949	0.000458949	0.0106405	-0.00208643			0.047	0.191362	0.0984561	0.103547			0.047	0.06155	0.26009	0.78571			0.047
	0.048	-0.089902	-0.0669936	-0.176445	-0.0377217	-0.135719	-0.0377217			0.048	0.0360943	0.0246401	0.0119132	0.0170039	0.00300433	-0.0122679			0.048	0.00554971	0.094638	0.0182766	-0.00844988	0.108638	0.0220947			0.048	0.00554971	0.094638	0.0068224	0.00300433	-0.00335912	-0.00463181			0.048	0.221907	0.10991	0.103547			0.048	0.06918	0.23718	0.79716			0.048
	0.049	-0.0886293	-0.052994	-0.162445	-0.0466306	-0.14081	-0.0339037			0.049	0.0475485	0.0220947	0.0220947	0.0170039	0.0144585	0.00427702			0.049	0.0170039	0.108638	0.0271854	0.0182766	0.113728	0.0348216			0.049	0.0170039	0.108638	-0.00463181	0.000458949	0.00300433	-0.00717719			0.049	0.216816	0.120092	0.0933653			0.049	0.08827	0.227	0.79971			0.049
	0.05	-0.0784478	-0.0657209	-0.180263	-0.0504486	-0.149718	-0.0288129			0.05	0.0488212	0.0233674	0.0335489	0.0195493	0.00427702	-0.0122679			0.05	0.0119132	0.112456	0.0157312	0.0170039	0.104819	0.0144585			0.05	0.0119132	0.112456	-0.000813741	0.00809509	-0.00335912	-0.00844988			0.05	0.193908	0.0984561	0.115001			0.05	0.07173	0.19136	0.82643			0.05
	0.051	-0.0835386	-0.0479033	-0.1739	-0.0542667	-0.129355	-0.0377217			0.051	0.0424577	0.0233674	0.00809509	0.0284581	0.00300433	-0.00717719			0.051	0.0170039	0.107365	0.00300433	0.0131859	0.0870019	0.0195493			0.051	0.0170039	0.107365	-0.00844988	0.000458949	0.00173164	-0.00972257			0.051	0.221907	0.127728	0.106092			0.051	0.10227	0.12518	0.82643			0.051
	0.052	-0.0784478	-0.0542667	-0.177718	-0.049176	-0.12681	-0.0466306			0.052	0.0475485	0.0259127	0.0259127	0.0170039	0.0068224	0.0119132			0.052	-0.00208643	0.0959107	0.020822	0.00173164	0.0920926	0.00809509			0.052	-0.00208643	0.0959107	0.00809509	0.00300433	-0.0122679	0.00554971			0.052	0.202817	0.108638	0.115001			0.052	0.07809	0.09591	0.80734			0.052
	0.053	-0.102629	-0.0593575	-0.175172	-0.0440852	-0.143355	-0.0479033			0.053	0.0488212	0.020822	0.020822	0.0182766	0.0106405	0.000458949			0.053	0.0068224	0.104819	0.0144585	0.00427702	0.0882745	0.0157312			0.053	0.0068224	0.104819	-0.0059045	0.00554971	0.00427702	-0.00208643			0.053	0.215543	0.0997288	0.102274			0.053	0.07937	0.07046	0.79716			0.053
	0.054	-0.0886293	-0.0517213	-0.171354	-0.0479033	-0.147173	-0.0517213			0.054	0.0424577	0.0271854	0.0195493	0.00300433	0.00427702	-0.00208643			0.054	-0.016086	0.10991	0.020822	0.0170039	0.0870019	0.0144585			0.054	-0.016086	0.10991	-0.00844988	-0.000813741	-0.00463181	0.00300433			0.054	0.205362	0.111183	0.0882745			0.054	0.087	0.05646	0.78953			0.054
	0.055	-0.086084	-0.0542667	-0.1739	-0.0300856	-0.130628	-0.0517213			0.055	0.0271854	0.020822	0.0271854	0.0144585	0.0068224	-0.00463181			0.055	0.00300433	0.0895472	0.0195493	0.0131859	0.102274	0.0182766			0.055	0.00300433	0.0895472	0.0068224	-0.00335912	0.0119132	-0.0148133			0.055	0.210453	0.10991	0.107365			0.055	0.08064	0.06155	0.74753			0.055
	0.056	-0.086084	-0.0568121	-0.182808	-0.0339037	-0.135719	-0.0351764			0.056	0.0462758	0.020822	0.0284581	0.0106405	0.000458949	-0.0199041			0.056	0.0068224	0.0882745	0.0131859	0.0220947	0.0806384	0.0119132			0.056	0.0068224	0.0882745	-0.00208643	0.0131859	0.0106405	-0.00717719			0.056	0.226998	0.115001	0.102274			0.056	0.08827	0.06028	0.71189			0.056
	0.057	-0.089902	-0.0568121	-0.158627	-0.0377217	-0.124265	-0.0249948			0.057	0.0437304	0.0271854	0.0284581	0.00173164	0.0068224	-0.00972257			0.057	0.00554971	0.106092	0.00809509	0.00554971	0.108638	0.00809509			0.057	0.00554971	0.106092	0.0157312	0.0182766	-0.000813741	0.0157312			0.057	0.207907	0.0984561	0.108638			0.057	0.07937	0.10482	0.69662			0.057
	0.058	-0.0937201	-0.052994	-0.1599	-0.052994	-0.133174	-0.0249948			0.058	0.0386396	0.0220947	0.0182766	0.0220947	0.00554971	-0.000813741			0.058	0.0182766	0.103547	0.0182766	-0.00208643	0.0984561	0.00809509			0.058	0.0182766	0.103547	-0.00463181	0.0182766	-0.00208643	-0.00208643			0.058	0.207907	0.10991	0.103547			0.058	0.087	0.09973	0.6788			0.058
	0.059	-0.0809932	-0.0466306	-0.180263	-0.036449	-0.143355	-0.0402671			0.059	0.0386396	0.0271854	0.0259127	0.0284581	-0.00972257	0.0144585			0.059	0.00936778	0.103547	0.0233674	0.0119132	0.0971834	0.0259127			0.059	0.00936778	0.103547	-0.00208643	0.00936778	-0.0109953	-0.0059045			0.059	0.216816	0.103547	0.122637			0.059	0.07809	0.157	0.68644			0.059
	0.06	-0.0962655	-0.0555394	-0.17899	-0.0440852	-0.149718	-0.049176			0.06	0.0513665	0.0310035	0.020822	0.0170039	0.0068224	-0.00208643			0.06	-0.000813741	0.107365	0.00173164	0.0106405	0.0895472	0.0182766			0.06	-0.000813741	0.107365	-0.00335912	0.00809509	-0.0059045	-0.0122679			0.06	0.211725	0.0959107	0.101001			0.06	0.08446	0.171	0.68389			0.06
	0.061	-0.086084	-0.0479033	-0.172627	-0.0428125	-0.139537	-0.032631			0.061	0.0399123	0.0297308	0.0220947	0.0119132	0.0144585	-0.0109953			0.061	0.0157312	0.0971834	0.0182766	0.000458949	0.0971834	0.0157312			0.061	0.0157312	0.0971834	-0.00844988	-0.00463181	-0.00335912	0.000458949			0.061	0.22318	0.115001	0.108638			0.061	0.07809	0.21554	0.70171			0.061
	0.062	-0.0886293	-0.0619029	-0.170081	-0.0351764	-0.142082	-0.0351764			0.062	0.0475485	0.0297308	0.0360943	0.00427702	-0.000813741	-0.00208643			0.062	0.00173164	0.0870019	0.0131859	0.0131859	0.0971834	0.000458949			0.062	0.00173164	0.0870019	0.000458949	0.00554971	0.00936778	0.0131859			0.062	0.207907	0.103547	0.0933653			0.062	0.08573	0.21936	0.72716			0.062
	0.063	-0.0835386	-0.0631755	-0.163718	-0.0453579	-0.150991	-0.0300856			0.063	0.0386396	0.0360943	0.0348216	0.0182766	0.00936778	-0.000813741			0.063	0.00173164	0.117546	0.0182766	0.00300433	0.0908199	0.0271854			0.063	0.00173164	0.117546	0.00554971	-0.00972257	-0.00844988	0.00809509			0.063	0.226998	0.0959107	0.121365			0.063	0.06155	0.21809	0.74498			0.063
	0.064	-0.0822659	-0.0389944	-0.180263	-0.0351764	-0.138264	-0.0389944			0.064	0.0335489	0.0182766	0.0170039	0.0271854	-0.00208643	-0.0199041			0.064	0.0157312	0.0984561	0.0360943	0.0233674	0.094638	0.0220947			0.064	0.0157312	0.0984561	-0.00463181	-0.000813741	0.0068224	-0.00335912			0.064	0.219362	0.115001	0.115001			0.064	0.08064	0.22827	0.77553			0.064
	0.065	-0.0886293	-0.0580848	-0.167536	-0.0377217	-0.130628	-0.0428125			0.065	0.0450031	0.0170039	0.0106405	0.0284581	0.0131859	-0.00208643			0.065	0.0195493	0.107365	0.0182766	0.0106405	0.0819111	0.00809509			0.065	0.0195493	0.107365	0.00554971	0.00809509	0.0157312	0.0144585			0.065	0.218089	0.102274	0.10991			0.065	0.08955	0.19136	0.79589			0.065
	0.066	-0.0949928	-0.0504486	-0.166263	-0.0377217	-0.142082	-0.0300856			0.066	0.0450031	0.0297308	0.0271854	0.0170039	0.0157312	0.00427702			0.066	0.00809509	0.108638	0.00809509	-0.00208643	0.102274	0.0144585			0.066	0.00809509	0.108638	-0.0122679	0.00809509	-0.00335912	-0.0122679			0.066	0.214271	0.10991	0.103547			0.066	0.07937	0.18245	0.81753			0.066
	0.067	-0.0835386	-0.0351764	-0.177718	-0.0339037	-0.12681	-0.0262675			0.067	0.0450031	0.0271854	0.0182766	0.0131859	-0.0148133	-0.00717719			0.067	-0.0059045	0.0984561	0.0170039	0.00427702	0.0933653	0.0170039			0.067	-0.0059045	0.0984561	0.0068224	0.00173164	0.00173164	-0.00717719			0.067	0.207907	0.111183	0.113728			0.067	0.08191	0.13918	0.82389			0.067
	0.068	-0.0848113	-0.0542667	-0.168809	-0.0313583	-0.152264	-0.0389944			0.068	0.041185	0.0284581	0.020822	0.00300433	0.00173164	-0.0059045			0.068	-0.00208643	0.0895472	0.0119132	0.0195493	0.0870019	0.0220947			0.068	-0.00208643	0.0895472	0.00554971	0.0119132	-0.00844988	-0.00208643			0.068	0.205362	0.103547	0.112456			0.068	0.06791	0.12136	0.82898			0.068
	0.069	-0.0886293	-0.0682663	-0.162445	-0.036449	-0.14081	-0.0619029			0.069	0.0437304	0.0259127	0.0157312	0.00173164	0.0119132	-0.0173587			0.069	0.00173164	0.104819	0.0170039	0.0106405	0.102274	0.0182766			0.069	0.00173164	0.104819	-0.0109953	-0.00208643	0.00554971	-0.0186314			0.069	0.220634	0.113728	0.10991			0.069	0.08955	0.09591	0.81625			0.069
	0.07	-0.0886293	-0.0542667	-0.161173	-0.0275402	-0.135719	-0.0339037			0.07	0.037367	0.0284581	0.0322762	0.0119132	0.00809509	-0.00335912			0.07	0.00809509	0.10991	0.00936778	-0.00208643	0.108638	0.0170039			0.07	0.00809509	0.10991	0.0131859	-0.0122679	-0.0059045	-0.00717719			0.07	0.201544	0.10991	0.111183			0.07	0.06409	0.08573	0.80734			0.07
	0.071	-0.0949928	-0.0631755	-0.184081	-0.036449	-0.138264	-0.0377217			0.071	0.0475485	0.0144585	0.00300433	0.0144585	0.00554971	-0.00208643			0.071	0.00300433	0.0895472	0.0119132	0.0157312	0.104819	0.0259127			0.071	0.00300433	0.0895472	-0.00463181	-0.00972257	-0.0148133	-0.0122679			0.071	0.22318	0.0971834	0.102274			0.071	0.06791	0.08573	0.78444			0.071
	0.072	-0.0937201	-0.0631755	-0.180263	-0.0275402	-0.147173	-0.0389944			0.072	0.0399123	0.00936778	0.0322762	0.00809509	0.00427702	-0.00463181			0.072	0.0170039	0.101001	0.020822	0.00936778	0.0895472	0.0271854			0.072	0.0170039	0.101001	-0.00463181	0.0195493	-0.00463181	0.00300433			0.072	0.219362	0.108638	0.107365			0.072	0.07809	0.08318	0.74116			0.072
	0.073	-0.101356	-0.0555394	-0.177718	-0.0288129	-0.144628	-0.0440852			0.073	0.0462758	0.0170039	0.0246401	0.0284581	-0.0122679	0.0068224			0.073	0.00936778	0.101001	0.0246401	-0.00208643	0.0806384	0.0157312			0.073	0.00936778	0.101001	0.0144585	0.0233674	0.0170039	-0.00717719			0.073	0.214271	0.0984561	0.111183			0.073	0.101	0.10482	0.7208			0.073
	0.074	-0.0809932	-0.0644482	-0.170081	-0.0237222	-0.138264	-0.0389944			0.074	0.0437304	0.0284581	0.0271854	0.0182766	0.00427702	-0.0186314			0.074	0.0131859	0.094638	0.0106405	0.00427702	0.094638	0.0182766			0.074	0.0131859	0.094638	0.0182766	0.000458949	0.0182766	-0.0122679			0.074	0.198998	0.111183	0.112456			0.074	0.07427	0.12773	0.66353			0.074
	0.075	-0.0809932	-0.0568121	-0.158627	-0.032631	-0.131901	-0.0351764			0.075	0.0437304	0.0297308	0.0195493	0.0119132	0.00427702	0.00300433			0.075	0.000458949	0.0920926	0.0131859	0.0259127	0.0819111	0.00936778			0.075	0.000458949	0.0920926	0.00809509	0.00427702	-0.00463181	0.000458949			0.075	0.206635	0.108638	0.104819			0.075	0.08955	0.16845	0.66098			0.075
	0.076	-0.086084	-0.0619029	-0.172627	-0.0377217	-0.1459	-0.0275402			0.076	0.0475485	0.0284581	0.0220947	0.00936778	0.00300433	-0.00463181			0.076	0.00300433	0.10991	0.00554971	0.0119132	0.102274	0.0170039			0.076	0.00300433	0.10991	-0.0122679	-0.000813741	-0.00717719	0.0119132			0.076	0.214271	0.116274	0.115001			0.076	0.08955	0.18882	0.64317			0.076
	0.077	-0.086084	-0.0580848	-0.177718	-0.0542667	-0.143355	-0.0339037			0.077	0.0335489	0.0170039	0.0220947	0.00809509	0.020822	-0.00463181			0.077	0.00173164	0.101001	0.0182766	0.00936778	0.0984561	0.0157312			0.077	0.00173164	0.101001	-0.0173587	0.00554971	-0.00208643	-0.00844988			0.077	0.215543	0.10991	0.101001			0.077	0.08573	0.22573	0.65589			0.077
	0.078	-0.100084	-0.049176	-0.166263	-0.0517213	-0.12681	-0.0275402			0.078	0.0450031	0.0170039	0.0310035	0.0220947	-0.00717719	-0.00335912			0.078	0.00300433	0.101001	0.0131859	-0.00335912	0.0895472	0.0271854			0.078	0.00300433	0.101001	-0.00717719	0.000458949	-0.0148133	-0.00335912			0.078	0.211725	0.103547	0.0997288			0.078	0.07937	0.23591	0.66353			0.078
	0.079	-0.0822659	-0.0580848	-0.158627	-0.0300856	-0.143355	-0.032631			0.079	0.0475485	0.0259127	0.0284581	0.0119132	0.0119132	-0.00463181			0.079	0.00173164	0.0997288	0.0233674	0.0195493	0.0984561	0.0259127			0.079	0.00173164	0.0997288	-0.00208643	0.0068224	-0.00463181	0.00554971			0.079	0.210453	0.121365	0.125183			0.079	0.07809	0.241	0.70171			0.079
	0.08	-0.0886293	-0.0479033	-0.17899	-0.0428125	-0.130628	-0.0275402			0.08	0.0488212	0.0284581	0.0220947	0.0119132	0.00427702	-0.0148133			0.08	-0.00463181	0.0984561	0.00809509	0.0068224	0.0984561	0.00554971			0.08	-0.00463181	0.0984561	-0.0122679	-0.0059045	0.00300433	-0.0122679			0.08	0.206635	0.117546	0.117546			0.08	0.08446	0.24609	0.74116			0.08
	0.081	-0.0797205	-0.0504486	-0.158627	-0.0466306	-0.12681	-0.0428125			0.081	0.041185	0.020822	0.0195493	0.00809509	0.00936778	0.000458949			0.081	0.00554971	0.101001	0.0157312	0.00809509	0.0882745	0.0131859			0.081	0.00554971	0.101001	0.00554971	0.00300433	-0.00335912	-0.0237222			0.081	0.195181	0.0959107	0.103547			0.081	0.08318	0.23972	0.72971			0.081
	0.082	-0.0835386	-0.0517213	-0.1599	-0.036449	-0.125537	-0.036449			0.082	0.041185	0.0259127	0.00809509	0.00173164	0.0068224	0.00427702			0.082	0.00809509	0.107365	0.0170039	0.0195493	0.106092	0.0119132			0.082	0.00809509	0.107365	0.00173164	-0.00335912	0.0131859	-0.000813741			0.082	0.221907	0.103547	0.125183			0.082	0.07937	0.20663	0.76025			0.082
	0.083	-0.0962655	-0.0631755	-0.167536	-0.032631	-0.147173	-0.0542667			0.083	0.041185	0.0157312	0.0233674	0.0233674	0.00300433	-0.0122679			0.083	0.0195493	0.101001	0.0259127	-0.000813741	0.0997288	0.0157312			0.083	0.0195493	0.101001	-0.0173587	0.000458949	0.00300433	-0.00717719			0.083	0.202817	0.0870019	0.106092			0.083	0.08827	0.15191	0.79589			0.083
	0.084	-0.0886293	-0.0504486	-0.176445	-0.0377217	-0.133174	-0.0377217			0.084	0.0310035	0.0233674	0.0119132	0.0170039	0.00427702	-0.0148133			0.084	0.0119132	0.0959107	0.00936778	0.0220947	0.094638	0.00936778			0.084	0.0119132	0.0959107	-0.0059045	-0.0059045	0.00554971	0.000458949			0.084	0.210453	0.103547	0.115001			0.084	0.087	0.08955	0.7768			0.084
	0.085	-0.0949928	-0.0708117	-0.161173	-0.0377217	-0.135719	-0.049176			0.085	0.0399123	0.0271854	0.0182766	0.0195493	0.0157312	-0.00208643			0.085	-0.00335912	0.0933653	0.0233674	0.0233674	0.0895472	0.0220947			0.085	-0.00335912	0.0933653	-0.00463181	0.00300433	-0.0059045	-0.000813741			0.085	0.220634	0.103547	0.121365			0.085	0.07046	0.05391	0.76789			0.085
	0.086	-0.0962655	-0.0542667	-0.175172	-0.0542667	-0.14081	-0.0428125			0.086	0.0424577	0.0271854	0.0131859	0.0182766	0.00554971	-0.00463181			0.086	0.0106405	0.094638	0.0131859	0.00300433	0.0971834	0.0195493			0.086	0.0106405	0.094638	0.0157312	0.00809509	-0.00844988	0.00427702			0.086	0.20918	0.104819	0.106092			0.086	0.08827	0.05264	0.76789			0.086
	0.087	-0.0937201	-0.052994	-0.172627	-0.0351764	-0.134446	-0.0313583			0.087	0.0424577	0.020822	0.0271854	0.0170039	-0.00717719	0.00809509			0.087	-0.0122679	0.104819	0.00936778	0.00300433	0.0933653	0.0119132			0.087	-0.0122679	0.104819	-0.00717719	0.00936778	-0.00463181	0.0157312			0.087	0.215543	0.108638	0.113728			0.087	0.08446	0.01064	0.73353			0.087
	0.088	-0.0886293	-0.0720844	-0.154809	-0.0389944	-0.130628	-0.0313583			0.088	0.0386396	0.0157312	0.0182766	0.0195493	0.0131859	-0.00335912			0.088	0.0144585	0.117546	0.0170039	0.00300433	0.0933653	0.00936778			0.088	0.0144585	0.117546	-0.00208643	0.0106405	0.0119132	-0.000813741			0.088	0.211725	0.106092	0.113728			0.088	0.08191	0.003	0.67626			0.088
	0.089	-0.0886293	-0.0542667	-0.176445	-0.0288129	-0.133174	-0.0351764			0.089	0.0437304	0.0195493	0.00809509	0.0233674	-0.00335912	-0.0173587			0.089	-0.000813741	0.0997288	0.020822	0.020822	0.0870019	0.020822			0.089	-0.000813741	0.0997288	0.0119132	0.00300433	0.000458949	-0.00717719			0.089	0.206635	0.12391	0.10991			0.089	0.07937	0.01446	0.67371			0.089
	0.09	-0.0937201	-0.0542667	-0.1739	-0.0428125	-0.139537	-0.032631			0.09	0.0450031	0.0322762	0.0271854	0.000458949	0.0119132	-0.00844988			0.09	0.0131859	0.104819	0.0170039	0.0068224	0.094638	0.0119132			0.09	0.0131859	0.104819	-0.0122679	-0.00463181	-0.00972257	-0.0109953			0.09	0.205362	0.0984561	0.10991			0.09	0.09209	0.03228	0.63808			0.09
	0.091	-0.0975382	-0.0644482	-0.172627	-0.052994	-0.144628	-0.0249948			0.091	0.0462758	0.0195493	0.0170039	0.0259127	-0.00335912	-0.00844988			0.091	0.00173164	0.101001	0.0119132	0.0131859	0.0908199	0.0119132			0.091	0.00173164	0.101001	-0.000813741	-0.00717719	0.00427702	-0.00717719			0.091	0.206635	0.104819	0.118819			0.091	0.07555	0.03355	0.6368			0.091
	0.092	-0.0797205	-0.069539	-0.170081	-0.0275402	-0.136991	-0.036449			0.092	0.0462758	0.0220947	0.0195493	0.0246401	0.0106405	0.00554971			0.092	0.00427702	0.094638	0.0157312	0.00554971	0.101001	0.0259127			0.092	0.00427702	0.094638	-0.00844988	-0.00208643	0.00809509	-0.00335912			0.092	0.212998	0.113728	0.112456			0.092	0.073	0.09718	0.62153			0.092
	0.093	-0.0835386	-0.0771751	-0.1599	-0.0453579	-0.136991	-0.0453579			0.093	0.0399123	0.0259127	0.0068224	0.0157312	0.00300433	0.00300433			0.093	-0.00463181	0.102274	0.0195493	0.0182766	0.102274	0.0284581			0.093	-0.00463181	0.102274	0.00300433	0.0310035	-0.00844988	-0.00844988			0.093	0.216816	0.101001	0.103547			0.093	0.09209	0.12136	0.6368			0.093
	0.094	-0.0848113	-0.069539	-0.185354	-0.0262675	-0.139537	-0.0351764			0.094	0.0462758	0.0297308	0.0119132	0.00300433	0.00300433	0.00300433			0.094	0.0195493	0.102274	0.0246401	0.0106405	0.101001	0.0170039			0.094	0.0195493	0.102274	0.00427702	-0.00844988	-0.00208643	-0.0135406			0.094	0.226998	0.107365	0.0984561			0.094	0.087	0.129	0.65717			0.094
	0.095	-0.0962655	-0.0784478	-0.167536	-0.0402671	-0.1459	-0.0402671			0.095	0.0437304	0.0233674	0.0195493	0.0220947	0.0068224	-0.0109953			0.095	-0.0122679	0.0920926	0.0157312	0.00936778	0.0768203	0.0068224			0.095	-0.0122679	0.0920926	-0.00717719	0.00809509	0.0119132	0.00300433			0.095	0.206635	0.115001	0.107365			0.095	0.08827	0.17991	0.67371			0.095
	0.096	-0.0784478	-0.0568121	-0.164991	-0.0377217	-0.14081	-0.0479033			0.096	0.0424577	0.0220947	0.0259127	0.00809509	0.00809509	-0.00717719			0.096	0.00300433	0.115001	0.0170039	0.0144585	0.0908199	0.0119132			0.096	0.00300433	0.115001	-0.00335912	0.00554971	-0.00335912	-0.00208643			0.096	0.206635	0.115001	0.130273			0.096	0.073	0.16591	0.66735			0.096
	0.097	-0.102629	-0.0797205	-0.171354	-0.0351764	-0.124265	-0.0389944			0.097	0.0335489	0.0271854	0.020822	0.0131859	-0.0059045	-0.016086			0.097	0.0157312	0.094638	0.0131859	0.0106405	0.104819	0.020822			0.097	0.0157312	0.094638	-0.00208643	-0.00463181	-0.00463181	-0.0109953			0.097	0.22318	0.0895472	0.117546			0.097	0.087	0.17482	0.71571			0.097
	0.098	-0.101356	-0.0720844	-0.172627	-0.032631	-0.131901	-0.0402671			0.098	0.0360943	0.0182766	0.0106405	0.0131859	0.00936778	0.00809509			0.098	0.00936778	0.108638	0.0144585	0.0233674	0.0793657	0.0246401			0.098	0.00936778	0.108638	-0.016086	-0.000813741	-0.00335912	-0.000813741			0.098	0.224452	0.0997288	0.113728			0.098	0.08446	0.16718	0.78062			0.098
	0.099	-0.0822659	-0.0759024	-0.154809	-0.0288129	-0.142082	-0.0313583			0.099	0.0488212	0.0233674	0.0271854	0.0195493	0.0106405	-0.00463181			0.099	-0.00208643	0.094638	0.00809509	-0.00844988	0.0895472	0.0170039			0.099	-0.00208643	0.094638	-0.016086	-0.00717719	0.00554971	0.00554971			0.099	0.207907	0.0933653	0.125183			0.099	0.05773	0.13791	0.80225			0.099
	0.1	-0.0962655	-0.0644482	-0.170081	-0.0504486	-0.136991	-0.0288129			0.1	0.0386396	0.0259127	0.0348216	0.0144585	0.0106405	0.00300433			0.1	-0.00463181	0.104819	0.0170039	0.0068224	0.0908199	0.020822			0.1	-0.00463181	0.104819	0.00427702	0.0068224	-0.00208643	-0.00463181			0.1	0.200271	0.115001	0.0997288			0.1	0.08573	0.12646	0.80225			0.1
	0.101	-0.0937201	-0.073357	-0.166263	-0.0517213	-0.142082	-0.0402671			0.101	0.0310035	0.020822	0.00936778	0.0195493	0.0170039	-0.0059045			0.101	-0.00717719	0.0984561	0.0182766	0.000458949	0.094638	0.0144585			0.101	-0.00717719	0.0984561	-0.00463181	0.0157312	-0.00463181	0.00427702			0.101	0.195181	0.118819	0.0933653			0.101	0.09846	0.09973	0.82898			0.101
	0.102	-0.0937201	-0.073357	-0.180263	-0.032631	-0.128083	-0.0389944			0.102	0.0450031	0.0297308	0.0182766	0.0131859	-0.00335912	-0.00335912			0.102	0.000458949	0.0984561	0.00427702	0.00809509	0.102274	0.0144585			0.102	0.000458949	0.0984561	0.00427702	0.0182766	-0.000813741	-0.0109953			0.102	0.20918	0.094638	0.115001			0.102	0.08573	0.073	0.79716			0.102
	0.103	-0.0797205	-0.0682663	-0.170081	-0.0377217	-0.147173	-0.0199041			0.103	0.0475485	0.0182766	0.0322762	0.0157312	0.0068224	-0.00844988			0.103	0.00427702	0.0984561	0.0131859	0.0106405	0.0870019	0.0195493			0.103	0.00427702	0.0984561	-0.00335912	-0.00335912	0.0170039	0.00809509			0.103	0.22318	0.101001	0.10991			0.103	0.06918	0.06791	0.76916			0.103
	0.104	-0.0873566	-0.0644482	-0.161173	-0.0224495	-0.133174	-0.0377217			0.104	0.041185	0.0182766	0.0170039	0.00809509	0.000458949	-0.0122679			0.104	-0.00717719	0.0984561	0.0106405	0.0246401	0.0984561	0.0157312			0.104	-0.00717719	0.0984561	-0.00463181	0.00427702	-0.00844988	0.00300433			0.104	0.210453	0.116274	0.0997288			0.104	0.06791	0.05391	0.74371			0.104
	0.105	-0.0937201	-0.069539	-0.158627	-0.0275402	-0.120447	-0.0453579			0.105	0.0348216	0.0220947	0.0297308	0.0348216	0.00427702	0.000458949			0.105	0.0068224	0.0984561	0.0182766	0.0131859	0.104819	0.0233674			0.105	0.0068224	0.0984561	0.00809509	-0.000813741	-0.00844988	0.00173164			0.105	0.206635	0.10991	0.115001			0.105	0.09464	0.003	0.70807			0.105
	0.106	-0.0873566	-0.0542667	-0.180263	-0.0377217	-0.143355	-0.0339037			0.106	0.0424577	0.0233674	0.0271854	0.0119132	0.00427702	-0.0135406			0.106	0.000458949	0.104819	0.0246401	0.00809509	0.0908199	0.00809509			0.106	0.000458949	0.104819	0.00300433	0.0170039	-0.00717719	0.00554971			0.106	0.20918	0.104819	0.12391			0.106	0.08446	0.03864	0.64826			0.106
	0.107	-0.0911747	-0.0568121	-0.161173	-0.0402671	-0.143355	-0.0440852			0.107	0.0462758	0.0259127	0.0144585	0.00809509	0.0106405	0.00427702			0.107	0.0106405	0.101001	0.0170039	0.00936778	0.0920926	0.0182766			0.107	0.0106405	0.101001	-0.00208643	0.00554971	-0.00208643	0.00427702			0.107	0.219362	0.103547	0.115001			0.107	0.07809	0.03228	0.6139			0.107
	0.108	-0.0962655	-0.0631755	-0.163718	-0.0428125	-0.134446	-0.036449			0.108	0.0564573	0.0195493	0.020822	0.0170039	-0.0059045	0.00427702			0.108	-0.00335912	0.0933653	-0.000813741	0.0233674	0.101001	0.0233674			0.108	-0.00335912	0.0933653	0.0119132	0.0068224	-0.00717719	-0.00208643			0.108	0.207907	0.103547	0.115001			0.108	0.08573	0.06918	0.58335			0.108
	0.109	-0.102629	-0.0593575	-0.170081	-0.0389944	-0.138264	-0.0339037			0.109	0.0450031	0.0233674	0.0297308	0.00936778	-0.00335912	0.00300433			0.109	0.00809509	0.118819	0.020822	0.00427702	0.0959107	0.0157312			0.109	0.00809509	0.118819	0.00427702	0.00300433	0.000458949	-0.00844988			0.109	0.201544	0.0959107	0.108638			0.109	0.07555	0.09591	0.5579			0.109
	0.11	-0.0937201	-0.0542667	-0.171354	-0.0300856	-0.134446	-0.0199041			0.11	0.0360943	0.0157312	0.0119132	0.0119132	0.00427702	-0.00717719			0.11	0.0106405	0.104819	0.0195493	0.0068224	0.104819	0.0131859			0.11	0.0106405	0.104819	0.00936778	0.0157312	0.0068224	-0.00208643			0.11	0.210453	0.107365	0.115001			0.11	0.07427	0.10609	0.56426			0.11
	0.111	-0.0924474	-0.0619029	-0.147173	-0.0479033	-0.125537	-0.0351764			0.111	0.0399123	0.0220947	0.0195493	0.020822	0.0182766	0.000458949			0.111	-0.00335912	0.0844565	0.0131859	0.0131859	0.0908199	0.0144585			0.111	-0.00335912	0.0844565	-0.00208643	0.0157312	0.00554971	-0.00463181			0.111	0.202817	0.118819	0.115001			0.111	0.09591	0.12391	0.57062			0.111
	0.112	-0.0822659	-0.0568121	-0.167536	-0.0288129	-0.134446	-0.032631			0.112	0.0437304	0.0310035	0.00427702	0.0259127	0.0106405	-0.00208643			0.112	0.0195493	0.107365	0.0144585	0.00809509	0.0920926	0.00936778			0.112	0.0195493	0.107365	-0.0186314	0.00300433	-0.00208643	0.0106405			0.112	0.206635	0.0971834	0.101001			0.112	0.09846	0.12264	0.60499			0.112
	0.113	-0.0759024	-0.0568121	-0.161173	-0.0389944	-0.136991	-0.0415398			0.113	0.0500939	0.0233674	0.0233674	0.0310035	0.0131859	-0.0122679			0.113	-0.0186314	0.0997288	0.0068224	0.00300433	0.0997288	0.0195493			0.113	-0.0186314	0.0997288	0.0106405	-0.0122679	-0.00463181	-0.0224495			0.113	0.226998	0.106092	0.116274			0.113	0.073	0.10991	0.64571			0.113
	0.114	-0.0937201	-0.0644482	-0.161173	-0.0351764	-0.138264	-0.036449			0.114	0.037367	0.0233674	0.0233674	0.0182766	-0.00335912	-0.0122679			0.114	0.0119132	0.0882745	0.0271854	0.00173164	0.0882745	0.0157312			0.114	0.0119132	0.0882745	0.00936778	-0.00717719	0.00173164	0.00809509			0.114	0.212998	0.12391	0.112456			0.114	0.06791	0.13536	0.65717			0.114
	0.115	-0.0911747	-0.0619029	-0.172627	-0.0428125	-0.129355	-0.0466306			0.115	0.0462758	0.0170039	0.00936778	0.00936778	-0.000813741	0.00173164			0.115	0.0131859	0.0806384	0.0195493	0.0144585	0.112456	0.0322762			0.115	0.0131859	0.0806384	-0.00335912	0.00554971	-0.00844988	0.00173164			0.115	0.206635	0.094638	0.118819			0.115	0.09082	0.11118	0.68517			0.115
	0.116	-0.0835386	-0.0631755	-0.182808	-0.049176	-0.139537	-0.0288129			0.116	0.0386396	0.0233674	0.0195493	0.00809509	-0.00717719	-0.00717719			0.116	0.0068224	0.101001	0.0195493	-0.00717719	0.0831838	0.00936778			0.116	0.0068224	0.101001	-0.00335912	-0.00972257	0.0144585	-0.00208643			0.116	0.20918	0.0984561	0.108638			0.116	0.07937	0.07937	0.70171			0.116
	0.117	-0.0937201	-0.0682663	-0.1599	-0.0237222	-0.134446	-0.0428125			0.117	0.0450031	0.0233674	0.0284581	0.0119132	0.00809509	0.00809509			0.117	0.0182766	0.0959107	0.00300433	0.0131859	0.0933653	0.0144585			0.117	0.0182766	0.0959107	-0.00335912	-0.00335912	-0.00208643	-0.00335912			0.117	0.195181	0.127728	0.0997288			0.117	0.07809	0.02973	0.67753			0.117
	0.118	-0.0797205	-0.0835386	-0.171354	-0.0453579	-0.130628	-0.036449			0.118	0.0297308	0.0182766	0.0157312	0.00300433	0.0068224	-0.016086			0.118	0.00300433	0.0997288	0.0195493	0.00554971	0.0908199	0.0284581			0.118	0.00300433	0.0997288	0.0157312	0.0106405	0.00936778	0.00300433			0.118	0.211725	0.0895472	0.10991			0.118	0.10482	-0.01481	0.67117			0.118
	0.119	-0.0886293	-0.0631755	-0.17899	-0.036449	-0.143355	-0.0402671			0.119	0.0399123	0.0271854	0.00809509	0.020822	-0.00208643	-0.00208643			0.119	0.00554971	0.104819	0.0182766	0.0119132	0.094638	0.020822			0.119	0.00554971	0.104819	-0.00208643	0.000458949	-0.0173587	-0.00335912			0.119	0.20918	0.101001	0.117546			0.119	0.08827	-0.03899	0.64189			0.119
	0.12	-0.102629	-0.073357	-0.166263	-0.0389944	-0.134446	-0.036449			0.12	0.041185	0.020822	0.0068224	0.0182766	-0.000813741	0.00809509			0.12	-0.0109953	0.118819	0.0106405	0.00173164	0.0984561	0.0119132			0.12	-0.0109953	0.118819	-0.0059045	0.0068224	-0.00972257	0.00554971			0.12	0.200271	0.111183	0.0984561			0.12	0.07809	-0.07081	0.64953			0.12
	0.121	-0.0886293	-0.0708117	-0.157355	-0.0415398	-0.133174	-0.0237222			0.121	0.0437304	0.0157312	0.020822	0.0220947	-0.0122679	0.00554971			0.121	0.0131859	0.0959107	0.0131859	0.00554971	0.094638	0.0157312			0.121	0.0131859	0.0959107	0.0106405	-0.00208643	0.00809509	-0.00208643			0.121	0.229543	0.103547	0.113728			0.121	0.08446	-0.07718	0.61262			0.121
	0.122	-0.0886293	-0.0682663	-0.171354	-0.032631	-0.138264	-0.0453579			0.122	0.0437304	0.0297308	0.0157312	0.0144585	0.00554971	-0.0288129			0.122	0.00936778	0.0971834	0.0284581	0.00809509	0.106092	0.020822			0.122	0.00936778	0.0971834	0.000458949	0.00173164	0.00936778	-0.0122679			0.122	0.211725	0.108638	0.111183			0.122	0.09337	-0.07845	0.60244			0.122
	0.123	-0.0937201	-0.0593575	-0.186626	-0.0453579	-0.133174	-0.0377217			0.123	0.0437304	0.0157312	0.0131859	0.020822	0.000458949	0.00554971			0.123	0.0131859	0.0920926	0.0068224	0.0170039	0.103547	0.0220947			0.123	0.0131859	0.0920926	-0.0059045	0.0233674	0.0068224	0.0106405			0.123	0.206635	0.0997288	0.0984561			0.123	0.07937	-0.09499	0.57826			0.123
	0.124	-0.0848113	-0.0771751	-0.163718	-0.0339037	-0.124265	-0.0377217			0.124	0.0360943	0.0271854	0.020822	0.0195493	0.00173164	-0.00335912			0.124	-0.00335912	0.0984561	0.0182766	0.00809509	0.0920926	0.0106405			0.124	-0.00335912	0.0984561	-0.00972257	0.00936778	-0.00972257	-0.00844988			0.124	0.198998	0.112456	0.0997288			0.124	0.08064	-0.06445	0.58208			0.124
	0.125	-0.0848113	-0.0644482	-0.149718	-0.032631	-0.139537	-0.0275402			0.125	0.0386396	0.0246401	0.0106405	0.0220947	-0.00463181	-0.00717719			0.125	0.000458949	0.107365	0.0246401	0.0119132	0.0882745	0.0131859			0.125	0.000458949	0.107365	0.00936778	-0.000813741	-0.00717719	0.00300433			0.125	0.206635	0.103547	0.118819			0.125	0.06409	-0.02499	0.58844			0.125
	0.126	-0.0962655	-0.0708117	-0.162445	-0.0466306	-0.131901	-0.0262675			0.126	0.0437304	0.0220947	0.0119132	0.00936778	0.00173164	0.00173164			0.126	-0.00335912	0.0882745	0.0106405	0.0119132	0.0933653	0.00554971			0.126	-0.00335912	0.0882745	0.00173164	-0.0059045	-0.0109953	0.00427702			0.126	0.201544	0.0984561	0.10991			0.126	0.09209	-0.00718	0.5999			0.126
	0.127	-0.102629	-0.0720844	-0.171354	-0.0440852	-0.138264	-0.0415398			0.127	0.0475485	0.020822	0.00427702	0.0144585	0.0106405	-0.000813741			0.127	0.00300433	0.102274	0.0220947	0.0284581	0.094638	0.00809509			0.127	0.00300433	0.102274	-0.00972257	0.00427702	0.00300433	-0.0122679			0.127	0.214271	0.0971834	0.113728			0.127	0.08573	0.03609	0.61517			0.127
	0.128	-0.086084	-0.069539	-0.164991	-0.0428125	-0.142082	-0.0389944			0.128	0.0424577	0.020822	-0.000813741	0.00936778	-0.00208643	-0.0109953			0.128	-0.00463181	0.117546	0.0182766	0.00809509	0.0984561	0.0170039			0.128	-0.00463181	0.117546	-0.00844988	0.0182766	0.00300433	0.00173164			0.128	0.204089	0.104819	0.113728			0.128	0.07809	0.06155	0.62917			0.128
	0.129	-0.0924474	-0.0619029	-0.164991	-0.0479033	-0.134446	-0.0415398			0.129	0.0450031	0.0259127	0.00554971	0.0195493	0.0106405	0.00300433			0.129	0.0119132	0.0997288	0.00554971	0.0119132	0.0933653	0.0233674			0.129	0.0119132	0.0997288	-0.00208643	-0.00208643	-0.000813741	-0.00335912			0.129	0.214271	0.104819	0.113728			0.129	0.073	0.07046	0.66735			0.129
	0.13	-0.086084	-0.0682663	-0.162445	-0.0339037	-0.144628	-0.0428125			0.13	0.0462758	0.0271854	0.0182766	0.0106405	-0.000813741	-0.00844988			0.13	0.0106405	0.0984561	0.0119132	-0.000813741	0.0895472	0.0220947			0.13	0.0106405	0.0984561	0.00300433	0.00809509	0.00554971	0.00936778			0.13	0.201544	0.0920926	0.108638			0.13	0.08318	0.08827	0.71698			0.13
	0.131	-0.0797205	-0.0708117	-0.164991	-0.0339037	-0.12681	-0.036449			0.131	0.0437304	0.0271854	0.00936778	0.0170039	0.000458949	0.00554971			0.131	0.00809509	0.0895472	-0.00208643	0.00173164	0.0908199	0.0170039			0.131	0.00809509	0.0895472	-0.000813741	0.00809509	0.00173164	-0.000813741			0.131	0.202817	0.0959107	0.112456			0.131	0.08064	0.07937	0.76789			0.131
	0.132	-0.0911747	-0.0784478	-0.186626	-0.0351764	-0.130628	-0.0300856			0.132	0.0386396	0.0131859	0.0144585	0.0119132	0.0170039	-0.00208643			0.132	0.000458949	0.0984561	0.0119132	0.0195493	0.0920926	0.0271854			0.132	0.000458949	0.0984561	-0.00717719	-0.00844988	0.00427702	0.000458949			0.132	0.198998	0.0971834	0.113728			0.132	0.08446	0.073	0.78444			0.132
	0.133	-0.0937201	-0.0669936	-0.143355	-0.032631	-0.133174	-0.0339037			0.133	0.0399123	0.0297308	0.0220947	0.0144585	-0.00844988	0.0131859			0.133	-0.00463181	0.094638	0.0157312	-0.0122679	0.0908199	0.0131859			0.133	-0.00463181	0.094638	0.00809509	-0.00844988	-0.0059045	0.0106405			0.133	0.219362	0.101001	0.101001			0.133	0.07809	0.05773	0.83025			0.133
	0.134	-0.0962655	-0.0682663	-0.182808	-0.0351764	-0.1459	-0.0275402			0.134	0.0450031	0.0195493	0.0182766	0.0271854	-0.00335912	-0.00972257			0.134	0.0131859	0.0997288	0.0182766	0.00554971	0.0920926	0.00809509			0.134	0.0131859	0.0997288	0.000458949	0.0144585	0.00173164	-0.0059045			0.134	0.220634	0.101001	0.0984561			0.134	0.08827	-0.00845	0.86716			0.134
	0.135	-0.0937201	-0.0746297	-0.17899	-0.049176	-0.133174	-0.0453579			0.135	0.0386396	0.0233674	0.0119132	0.0119132	0.00173164	-0.0122679			0.135	0.00554971	0.10991	0.0144585	0.0220947	0.0857292	0.0170039			0.135	0.00554971	0.10991	-0.00717719	0.00300433	-0.000813741	0.00936778			0.135	0.20918	0.094638	0.108638			0.135	0.07937	-0.0479	0.87861			0.135
	0.136	-0.089902	-0.0759024	-0.167536	-0.0415398	-0.120447	-0.0211768			0.136	0.0310035	0.0284581	0.0068224	0.00427702	0.00936778	0.00427702			0.136	-0.000813741	0.101001	0.0195493	0.00300433	0.0997288	0.0157312			0.136	-0.000813741	0.101001	0.0119132	-0.0059045	-0.00844988	0.00300433			0.136	0.204089	0.111183	0.120092			0.136	0.07427	-0.02881	0.88752			0.136
	0.137	-0.0962655	-0.0682663	-0.163718	-0.0428125	-0.142082	-0.0275402			0.137	0.0386396	0.0195493	0.0182766	0.00936778	-0.000813741	-0.00972257			0.137	0.00300433	0.0933653	0.0259127	-0.00335912	0.102274	0.0170039			0.137	0.00300433	0.0933653	0.0068224	0.00300433	0.0068224	-0.00844988			0.137	0.204089	0.112456	0.118819			0.137	0.07682	-0.05936	0.8608			0.137
	0.138	-0.0924474	-0.0809932	-0.1599	-0.0262675	-0.139537	-0.0479033			0.138	0.0322762	0.0131859	0.00300433	0.0233674	-0.00208643	0.0119132			0.138	0.0131859	0.108638	0.0182766	0.0271854	0.0984561	0.020822			0.138	0.0131859	0.108638	-0.00972257	0.00300433	0.000458949	-0.00208643			0.138	0.196453	0.0984561	0.0920926			0.138	0.08318	-0.03772	0.82643			0.138
	0.139	-0.0975382	-0.0720844	-0.170081	-0.0415398	-0.117901	-0.0377217			0.139	0.0437304	0.020822	0.00809509	0.00300433	0.0106405	-0.00972257			0.139	-0.00844988	0.0997288	0.00300433	0.0119132	0.0895472	0.0246401			0.139	-0.00844988	0.0997288	-0.0109953	0.00936778	-0.0173587	-0.00844988			0.139	0.201544	0.104819	0.094638			0.139	0.08064	-0.03263	0.78189			0.139
	0.14	-0.0886293	-0.086084	-0.1599	-0.0389944	-0.133174	-0.0402671			0.14	0.0424577	0.0195493	0.0182766	0.0157312	-0.00844988	-0.00972257			0.14	0.0131859	0.0971834	0.00809509	0.0131859	0.0819111	0.0170039			0.14	0.0131859	0.0971834	-0.00208643	-0.00208643	-0.00463181	0.00809509			0.14	0.206635	0.104819	0.116274			0.14	0.08191	0.00937	0.74371			0.14
	0.141	-0.0924474	-0.0771751	-0.164991	-0.0351764	-0.1459	-0.0377217			0.141	0.0475485	0.0271854	0.020822	0.00300433	0.00809509	-0.0122679			0.141	-0.00208643	0.0895472	0.00554971	0.0144585	0.10991	0.0144585			0.141	-0.00208643	0.0895472	0.00173164	0.0119132	-0.00717719	0.00427702			0.141	0.200271	0.094638	0.108638			0.141	0.06791	0.01573	0.73607			0.141
	0.142	-0.089902	-0.069539	-0.171354	-0.0504486	-0.139537	-0.0288129			0.142	0.0335489	0.0233674	0.00936778	0.0106405	0.000458949	0.00554971			0.142	-0.00335912	0.102274	0.0246401	0.0119132	0.104819	0.0157312			0.142	-0.00335912	0.102274	0.00936778	0.000458949	0.0170039	0.000458949			0.142	0.212998	0.0933653	0.108638			0.142	0.073	0.10609	0.72971			0.142
	0.143	-0.0962655	-0.0593575	-0.163718	-0.0440852	-0.134446	-0.036449			0.143	0.0424577	0.0195493	0.0131859	0.0220947	0.0106405	-0.0237222			0.143	0.00173164	0.0971834	0.0131859	0.0195493	0.0870019	0.0182766			0.143	0.00173164	0.0971834	0.00554971	0.0068224	0.00173164	-0.00717719			0.143	0.186272	0.108638	0.111183			0.143	0.07555	0.12773	0.7348			0.143
	0.144	-0.0835386	-0.0848113	-0.154809	-0.0313583	-0.14081	-0.0313583			0.144	0.0322762	0.0220947	0.0195493	0.0157312	-0.00208643	-0.0122679			0.144	0.00554971	0.094638	0.0144585	0.00554971	0.102274	0.0246401			0.144	0.00554971	0.094638	-0.000813741	-0.00208643	0.0106405	-0.00208643			0.144	0.206635	0.116274	0.10991			0.144	0.09337	0.16209	0.75262			0.144
	0.145	-0.0886293	-0.0682663	-0.168809	-0.0377217	-0.120447	-0.0389944			0.145	0.0310035	0.0271854	0.0182766	0.0259127	-0.00208643	0.0068224			0.145	0.000458949	0.0920926	0.0068224	0.00173164	0.101001	0.0233674			0.145	0.000458949	0.0920926	0.0119132	0.0068224	-0.0135406	0.000458949			0.145	0.206635	0.104819	0.113728			0.145	0.087	0.15955	0.78444			0.145
	0.146	-0.0886293	-0.0746297	-0.176445	-0.0351764	-0.133174	-0.0377217			0.146	0.0335489	0.020822	0.0233674	0.0233674	0.0068224	-0.00208643			0.146	0.0233674	0.0997288	0.0119132	0.0144585	0.0920926	0.0068224			0.146	0.0233674	0.0997288	-0.0059045	0.00173164	0.00300433	-0.0109953			0.146	0.200271	0.101001	0.103547			0.146	0.07809	0.14045	0.74753			0.146
	0.147	-0.086084	-0.0428125	-0.171354	-0.0313583	-0.125537	-0.0262675			0.147	0.037367	0.0271854	0.00554971	0.0119132	-0.00208643	-0.0135406			0.147	0.0131859	0.0959107	0.0119132	0.00554971	0.104819	0.0310035			0.147	0.0131859	0.0959107	0.0068224	-0.00463181	0.00300433	0.000458949			0.147	0.210453	0.113728	0.0971834			0.147	0.07937	0.12646	0.79589			0.147
	0.148	-0.10772	-0.0657209	-0.157355	-0.0428125	-0.128083	-0.0339037			0.148	0.041185	0.0195493	0.00936778	0.0220947	0.00554971	-0.00463181			0.148	-0.0135406	0.0933653	0.0144585	0.00809509	0.0844565	0.00936778			0.148	-0.0135406	0.0933653	0.00173164	0.0182766	-0.0059045	0.0068224			0.148	0.206635	0.113728	0.113728			0.148	0.08064	0.115	0.82134			0.148
	0.149	-0.073357	-0.0771751	-0.1599	-0.0377217	-0.139537	-0.0288129			0.149	0.0424577	0.0170039	0.0220947	0.00300433	0.00936778	0.0195493			0.149	0.0106405	0.107365	0.00554971	-0.000813741	0.0984561	0.0220947			0.149	0.0106405	0.107365	-0.00717719	-0.00463181	0.00300433	0.000458949			0.149	0.202817	0.0882745	0.118819			0.149	0.08064	0.11246	0.84171			0.149
	0.15	-0.0937201	-0.0746297	-0.170081	-0.0479033	-0.131901	-0.0377217			0.15	0.0437304	0.0182766	0.00300433	0.0170039	-0.000813741	-0.00717719			0.15	-0.00208643	0.094638	0.0106405	0.00809509	0.0895472	0.0182766			0.15	-0.00208643	0.094638	-0.0059045	0.00936778	0.0068224	0.000458949			0.15	0.214271	0.103547	0.113728			0.15	0.07937	0.07937	0.81498			0.15
	0.151	-0.105174	-0.0835386	-0.171354	-0.0453579	-0.129355	-0.0402671			0.151	0.037367	0.0246401	0.00554971	0.0119132	0.0182766	-0.016086			0.151	0.00809509	0.0882745	0.0220947	-0.00208643	0.0895472	0.0322762			0.151	0.00809509	0.0882745	-0.000813741	0.00936778	0.0119132	-0.00335912			0.151	0.19009	0.103547	0.115001			0.151	0.09464	0.05009	0.82389			0.151
	0.152	-0.0886293	-0.0593575	-0.164991	-0.0542667	-0.130628	-0.0453579			0.152	0.0348216	0.0246401	0.0182766	0.0131859	-0.000813741	-0.00844988			0.152	0.00173164	0.0895472	0.0195493	0.00554971	0.0895472	0.0284581			0.152	0.00173164	0.0895472	0.00173164	0.0119132	0.000458949	-0.0135406			0.152	0.221907	0.106092	0.101001			0.152	0.08318	0.017	0.82134			0.152
	0.153	-0.086084	-0.0580848	-0.154809	-0.0313583	-0.139537	-0.0377217			0.153	0.0424577	0.0195493	0.00936778	0.0182766	-0.0059045	0.0068224			0.153	0.0119132	0.106092	0.00809509	-0.00335912	0.0920926	0.0284581			0.153	0.0119132	0.106092	0.00554971	0.00427702	-0.016086	-0.00208643			0.153	0.19009	0.115001	0.0844565			0.153	0.08318	-0.02245	0.78062			0.153
	0.154	-0.100084	-0.0784478	-0.157355	-0.0402671	-0.133174	-0.0339037			0.154	0.0399123	0.0144585	0.0271854	0.0144585	-0.00463181	-0.00463181			0.154	0.00173164	0.0882745	0.00936778	0.0259127	0.0908199	0.00300433			0.154	0.00173164	0.0882745	-0.00208643	-0.0135406	0.00173164	-0.00208643			0.154	0.216816	0.0920926	0.094638			0.154	0.10227	-0.0199	0.77298			0.154
	0.155	-0.0937201	-0.0568121	-0.1739	-0.0377217	-0.131901	-0.0428125			0.155	0.037367	0.0220947	0.00427702	0.00554971	0.0131859	-0.00844988			0.155	0.0068224	0.0959107	0.0157312	-0.0059045	0.0984561	0.00554971			0.155	0.0068224	0.0959107	-0.0186314	-0.00463181	-0.0059045	0.0144585			0.155	0.214271	0.0971834	0.106092			0.155	0.07682	0.01191	0.74244			0.155
	0.156	-0.089902	-0.0822659	-0.172627	-0.049176	-0.143355	-0.0428125			0.156	0.0386396	0.0246401	0.020822	0.0119132	-0.00208643	-0.00335912			0.156	0.000458949	0.0984561	0.0170039	0.0220947	0.118819	0.0259127			0.156	0.000458949	0.0984561	0.00554971	0.00809509	0.00173164	-0.00844988			0.156	0.186272	0.106092	0.0984561			0.156	0.073	0.01573	0.70553			0.156
	0.157	-0.0784478	-0.0644482	-0.171354	-0.0300856	-0.1459	-0.0224495			0.157	0.0500939	0.0310035	0.0119132	0.0119132	0.00936778	-0.00972257			0.157	0.00173164	0.0959107	0.0182766	0.0106405	0.0806384	0.020822			0.157	0.00173164	0.0959107	0.0068224	0.00809509	0.00936778	-0.00208643			0.157	0.192635	0.122637	0.118819			0.157	0.08955	0.04373	0.6928			0.157
	0.158	-0.0988109	-0.0580848	-0.1599	-0.0377217	-0.136991	-0.0313583			0.158	0.0462758	0.020822	0.0068224	0.0157312	0.0119132	0.0131859			0.158	0.00936778	0.094638	0.0106405	-0.0059045	0.0857292	0.0182766			0.158	0.00936778	0.094638	-0.0122679	0.00809509	-0.000813741	0.0106405			0.158	0.20918	0.103547	0.106092			0.158	0.08318	0.07809	0.65462			0.158
	0.159	-0.0886293	-0.0669936	-0.158627	-0.036449	-0.1459	-0.0186314			0.159	0.0437304	0.0195493	0.0131859	0.0106405	-0.000813741	-0.016086			0.159	0.00809509	0.103547	0.0195493	0.0131859	0.0920926	0.0170039			0.159	0.00809509	0.103547	0.0170039	0.00809509	-0.00717719	-0.000813741			0.159	0.212998	0.107365	0.120092			0.159	0.08955	0.13282	0.64444			0.159
	0.16	-0.0924474	-0.0657209	-0.182808	-0.0389944	-0.147173	-0.032631			0.16	0.0386396	0.0297308	0.00300433	0.00936778	0.0068224	-0.0059045			0.16	0.0068224	0.0971834	0.0170039	0.0119132	0.0933653	0.0220947			0.16	0.0068224	0.0971834	0.000458949	0.0182766	0.00427702	0.000458949			0.16	0.206635	0.0933653	0.0997288			0.16	0.06409	0.16973	0.67498			0.16
	0.161	-0.0784478	-0.0644482	-0.163718	-0.0542667	-0.144628	-0.0479033			0.161	0.0424577	0.0271854	0.00809509	0.0220947	0.0068224	-0.00844988			0.161	0.0068224	0.0984561	0.0170039	0.0182766	0.103547	0.0119132			0.161	0.0068224	0.0984561	0.00809509	0.0119132	-0.000813741	-0.00972257			0.161	0.204089	0.113728	0.116274			0.161	0.06791	0.19009	0.66353			0.161
	0.162	-0.0873566	-0.0682663	-0.171354	-0.0428125	-0.14081	-0.0351764			0.162	0.0437304	0.020822	0.0322762	0.0220947	0.0068224	0.00427702			0.162	0.00554971	0.0857292	0.0284581	0.0182766	0.0908199	0.0182766			0.162	0.00554971	0.0857292	-0.00717719	-0.0148133	-0.0186314	0.00936778			0.162	0.206635	0.102274	0.106092			0.162	0.07682	0.24609	0.67498			0.162
	0.163	-0.0949928	-0.0771751	-0.157355	-0.0389944	-0.139537	-0.0262675			0.163	0.0462758	0.0182766	0.00300433	0.00427702	0.0144585	-0.00844988			0.163	0.00554971	0.094638	0.00809509	0.0195493	0.0793657	0.0195493			0.163	0.00554971	0.094638	-0.00463181	-0.00335912	-0.00335912	-0.00844988			0.163	0.214271	0.103547	0.104819			0.163	0.08191	0.22318	0.73226			0.163
	0.164	-0.0759024	-0.0517213	-0.154809	-0.0389944	-0.144628	-0.0199041			0.164	0.0526392	0.0246401	0.0310035	0.0119132	-0.00208643	-0.0122679			0.164	-0.0059045	0.108638	0.020822	-0.00844988	0.0997288	0.00809509			0.164	-0.0059045	0.108638	-0.0122679	0.00809509	0.0157312	0.00300433			0.164	0.196453	0.0984561	0.10991			0.164	0.08446	0.21809	0.76025			0.164
	0.165	-0.0911747	-0.0631755	-0.164991	-0.0249948	-0.153536	-0.0288129			0.165	0.0360943	0.0131859	0.0220947	0.0170039	-0.0148133	-0.00844988			0.165	-0.0059045	0.0971834	0.0131859	0.0106405	0.108638	0.0259127			0.165	-0.0059045	0.0971834	-0.00463181	0.00173164	0.00427702	0.00173164			0.165	0.202817	0.106092	0.106092			0.165	0.07046	0.23082	0.77298			0.165
	0.166	-0.106447	-0.0555394	-0.161173	-0.0288129	-0.138264	-0.0351764			0.166	0.0360943	0.020822	0.0119132	0.0106405	0.00554971	-0.000813741			0.166	-0.00208643	0.094638	0.00809509	-0.00208643	0.0844565	0.0170039			0.166	-0.00208643	0.094638	-0.00335912	-0.0211768	0.00554971	0.00300433			0.166	0.212998	0.0933653	0.111183			0.166	0.07555	0.21173	0.80734			0.166
	0.167	-0.0937201	-0.0759024	-0.176445	-0.0415398	-0.135719	-0.0377217			0.167	0.0462758	0.0259127	0.000458949	0.0182766	-0.00335912	-0.0135406			0.167	0.00173164	0.107365	0.0322762	0.000458949	0.0882745	0.0259127			0.167	0.00173164	0.107365	-0.00844988	0.0131859	-0.0109953	0.00427702			0.167	0.201544	0.0870019	0.117546			0.167	0.07682	0.16209	0.81625			0.167
	0.168	-0.105174	-0.0797205	-0.180263	-0.0440852	-0.129355	-0.032631			0.168	0.0386396	0.0271854	0.0106405	0.0119132	0.00173164	0.0119132			0.168	-0.0059045	0.0971834	0.0246401	0.00936778	0.0920926	0.0170039			0.168	-0.0059045	0.0971834	0.0220947	0.0119132	0.00427702	0.0106405			0.168	0.192635	0.117546	0.107365			0.168	0.08827	0.12518	0.79716			0.168
	0.169	-0.0848113	-0.0580848	-0.162445	-0.0288129	-0.135719	-0.0351764			0.169	0.041185	0.0233674	0.0106405	0.0284581	0.00809509	-0.00208643			0.169	0.0131859	0.0895472	0.00554971	0.00300433	0.0895472	0.0195493			0.169	0.0131859	0.0895472	-0.0109953	-0.00844988	-0.00208643	0.00809509			0.169	0.195181	0.111183	0.0933653			0.169	0.08064	0.12264	0.79462			0.169
	0.17	-0.0924474	-0.0619029	-0.1739	-0.0377217	-0.115356	-0.036449			0.17	0.0475485	0.0220947	0.0068224	0.0131859	0.0068224	0.00300433			0.17	0.000458949	0.094638	0.0144585	0.0182766	0.108638	0.0119132			0.17	0.000458949	0.094638	-0.00844988	0.00936778	-0.00208643	-0.000813741			0.17	0.207907	0.0857292	0.115001			0.17	0.07937	0.06409	0.76025			0.17
	0.171	-0.0911747	-0.0644482	-0.1599	-0.0313583	-0.135719	-0.0300856			0.171	0.0424577	0.0131859	0.0144585	0.0284581	0.000458949	-0.0109953			0.171	-0.000813741	0.102274	0.0157312	0.0068224	0.0819111	0.0170039			0.171	-0.000813741	0.102274	0.00300433	-0.00844988	0.00554971	-0.00335912			0.171	0.210453	0.0908199	0.10991			0.171	0.087	0.07682	0.72335			0.171
	0.172	-0.105174	-0.0517213	-0.166263	-0.0300856	-0.150991	-0.0428125			0.172	0.0437304	0.0233674	-0.00463181	0.0182766	0.00809509	-0.00335912			0.172	0.000458949	0.0984561	0.0131859	0.0195493	0.0933653	0.0106405			0.172	0.000458949	0.0984561	-0.0186314	0.00427702	-0.00335912	-0.0122679			0.172	0.202817	0.107365	0.101001			0.172	0.08955	0.06409	0.68771			0.172
	0.173	-0.0835386	-0.0517213	-0.154809	-0.0402671	-0.138264	-0.0199041			0.173	0.0424577	0.0220947	0.0259127	0.0220947	0.00809509	0.0131859			0.173	-0.000813741	0.102274	0.0131859	0.0170039	0.0882745	0.0131859			0.173	-0.000813741	0.102274	-0.000813741	0.00300433	-0.00208643	0.0106405			0.173	0.186272	0.0920926	0.10991			0.173	0.073	0.07555	0.66353			0.173
	0.174	-0.0784478	-0.0644482	-0.154809	-0.0224495	-0.139537	-0.032631			0.174	0.041185	0.0259127	0.0170039	0.0157312	-0.00717719	-0.0135406			0.174	0.00173164	0.0831838	0.0284581	0.0106405	0.094638	0.0246401			0.174	0.00173164	0.0831838	0.0131859	-0.00335912	0.00809509	-0.00335912			0.174	0.205362	0.0997288	0.0997288			0.174	0.08827	0.09082	0.6368			0.174
	0.175	-0.0797205	-0.0644482	-0.172627	-0.032631	-0.135719	-0.0402671			0.175	0.0335489	0.0233674	0.0119132	0.0182766	0.00554971	-0.000813741			0.175	-0.00208643	0.0959107	0.00554971	0.00936778	0.0933653	0.0182766			0.175	-0.00208643	0.0959107	0.0106405	0.00554971	-0.00972257	-0.00208643			0.175	0.205362	0.104819	0.0920926			0.175	0.08446	0.14427	0.6139			0.175
	0.176	-0.111538	-0.0657209	-0.164991	-0.032631	-0.136991	-0.0389944			0.176	0.037367	0.0233674	0.0131859	0.00427702	0.0182766	0.00300433			0.176	-0.0109953	0.0971834	0.0220947	0.00300433	0.0920926	0.0182766			0.176	-0.0109953	0.0971834	-0.00844988	0.00173164	0.00173164	0.00936778			0.176	0.196453	0.106092	0.111183			0.176	0.08827	0.17864	0.62662			0.176
	0.177	-0.0848113	-0.069539	-0.164991	-0.0339037	-0.115356	-0.0351764			0.177	0.041185	0.0195493	0.0170039	0.0131859	0.00300433	-0.00208643			0.177	0.0119132	0.078093	0.0182766	0.00809509	0.0870019	0.0170039			0.177	0.0119132	0.078093	-0.0173587	-0.00335912	0.00554971	-0.0148133			0.177	0.183726	0.0933653	0.0920926			0.177	0.07937	0.21682	0.67117			0.177
	0.178	-0.0975382	-0.0479033	-0.157355	-0.0389944	-0.130628	-0.032631			0.178	0.0348216	0.0195493	0.0170039	0.0271854	-0.000813741	-0.0249948			0.178	0.00173164	0.0933653	0.00809509	0.00173164	0.0870019	0.0170039			0.178	0.00173164	0.0933653	-0.0211768	0.0068224	0.00936778	-0.00463181			0.178	0.214271	0.094638	0.122637			0.178	0.07046	0.22445	0.69026			0.178
	0.179	-0.0937201	-0.0619029	-0.168809	-0.0389944	-0.142082	-0.0237222			0.179	0.0360943	0.0284581	0.00936778	0.0182766	0.0119132	-0.016086			0.179	-0.00208643	0.0920926	0.0233674	0.00809509	0.0984561	0.0170039			0.179	-0.00208643	0.0920926	-0.000813741	0.00809509	0.000458949	-0.000813741			0.179	0.197726	0.103547	0.117546			0.179	0.07937	0.26645	0.69917			0.179
	0.18	-0.0924474	-0.0619029	-0.164991	-0.0313583	-0.128083	-0.0313583			0.18	0.0462758	0.0233674	0.0131859	0.0157312	0.0119132	0.0157312			0.18	-0.00844988	0.094638	0.00427702	0.000458949	0.0908199	0.0271854			0.18	-0.00844988	0.094638	0.0068224	0.00554971	-0.00335912	-0.00208643			0.18	0.193908	0.0984561	0.0959107			0.18	0.08573	0.27663	0.77935			0.18
	0.181	-0.0759024	-0.0644482	-0.175172	-0.0466306	-0.138264	-0.0389944			0.181	0.037367	0.0233674	0.0119132	0.0106405	-0.0059045	-0.0059045			0.181	0.00809509	0.0908199	0.00809509	0.0144585	0.0997288	0.0106405			0.181	0.00809509	0.0908199	0.00554971	0.00554971	-0.0059045	-0.000813741			0.181	0.188817	0.103547	0.113728			0.181	0.07937	0.241	0.81498			0.181
	0.182	-0.0771751	-0.0593575	-0.164991	-0.0428125	-0.139537	-0.032631			0.182	0.0437304	0.0233674	0.0144585	0.00936778	-0.0059045	0.0068224			0.182	0.00809509	0.0984561	0.0246401	0.00554971	0.0882745	0.020822			0.182	0.00809509	0.0984561	-0.0135406	-0.0109953	0.0119132	-0.00208643			0.182	0.201544	0.0844565	0.10991			0.182	0.10482	0.24736	0.78825			0.182
	0.183	-0.0937201	-0.0631755	-0.164991	-0.0351764	-0.124265	-0.0288129			0.183	0.0386396	0.0220947	0.00173164	0.0297308	-0.00335912	-0.00972257			0.183	0.0157312	0.0984561	0.0182766	-0.000813741	0.0920926	0.0246401			0.183	0.0157312	0.0984561	0.00173164	-0.0224495	-0.00463181	-0.00717719			0.183	0.198998	0.0997288	0.108638			0.183	0.08318	0.20791	0.82643			0.183
	0.184	-0.100084	-0.0720844	-0.1599	-0.0428125	-0.124265	-0.0211768			0.184	0.0386396	0.0233674	0.0144585	0.0233674	0.0119132	-0.00463181			0.184	0.00936778	0.104819	0.0220947	0.0170039	0.0959107	0.0106405			0.184	0.00936778	0.104819	-0.00463181	0.0119132	-0.0109953	0.000458949			0.184	0.20918	0.101001	0.0971834			0.184	0.08064	0.15955	0.82262			0.184
	0.185	-0.086084	-0.069539	-0.176445	-0.0389944	-0.133174	-0.0479033			0.185	0.0399123	0.0233674	0.00936778	0.00300433	0.00173164	-0.00463181			0.185	-0.00463181	0.104819	0.0195493	0.00809509	0.10991	0.0195493			0.185	-0.00463181	0.104819	0.00554971	-0.00208643	0.00300433	0.0157312			0.185	0.211725	0.104819	0.0971834			0.185	0.07427	0.12518	0.8608			0.185
	0.186	-0.0988109	-0.0466306	-0.166263	-0.0402671	-0.147173	-0.0428125			0.186	0.0335489	0.0220947	0.00809509	0.0144585	0.0195493	-0.0135406			0.186	-0.00972257	0.0768203	0.00936778	0.000458949	0.0857292	0.0170039			0.186	-0.00972257	0.0768203	-0.0122679	-0.000813741	0.0119132	-0.0059045			0.186	0.183726	0.094638	0.10991			0.186	0.08064	0.08955	0.84043			0.186
	0.187	-0.100084	-0.052994	-0.1599	-0.0389944	-0.136991	-0.0593575			0.187	0.0437304	0.0220947	0.0119132	0.0360943	0.00300433	-0.0135406			0.187	0.000458949	0.0831838	0.0170039	0.0119132	0.0844565	0.0170039			0.187	0.000458949	0.0831838	-0.00208643	0.0068224	0.00300433	0.00936778			0.187	0.20918	0.0959107	0.116274			0.187	0.07937	0.07809	0.82007			0.187
	0.188	-0.0835386	-0.0580848	-0.163718	-0.0555394	-0.139537	-0.0224495			0.188	0.0399123	0.0220947	0.0297308	0.0119132	-0.00208643	0.00300433			0.188	-0.00717719	0.0895472	0.00936778	0.0182766	0.0959107	0.0182766			0.188	-0.00717719	0.0895472	0.00300433	-0.0059045	-0.0122679	-0.00717719			0.188	0.202817	0.106092	0.108638			0.188	0.073	0.06409	0.79207			0.188
	0.189	-0.0848113	-0.0631755	-0.158627	-0.0262675	-0.122992	-0.0249948			0.189	0.037367	0.0271854	0.0157312	-0.00208643	-0.000813741	0.0106405			0.189	-0.000813741	0.0984561	0.0182766	0.0106405	0.107365	0.0170039			0.189	-0.000813741	0.0984561	0.0068224	0.0131859	-0.00717719	0.00300433			0.189	0.188817	0.103547	0.0984561			0.189	0.07682	0.07809	0.76407			0.189
	0.19	-0.101356	-0.052994	-0.177718	-0.0479033	-0.136991	-0.0288129			0.19	0.0386396	0.0259127	0.00936778	0.0220947	-0.0059045	-0.000813741			0.19	-0.0135406	0.101001	0.0119132	0.00809509	0.0844565	0.0068224			0.19	-0.0135406	0.101001	0.0106405	0.0068224	-0.0249948	-0.00717719			0.19	0.201544	0.094638	0.0997288			0.19	0.07427	0.07046	0.74116			0.19
	0.191	-0.0937201	-0.0644482	-0.158627	-0.0542667	-0.143355	-0.0542667			0.191	0.0488212	0.0271854	0.0182766	0.0157312	-0.00335912	-0.0059045			0.191	0.0106405	0.101001	0.0170039	-0.000813741	0.0870019	0.0144585			0.191	0.0106405	0.101001	0.00300433	0.00936778	0.00173164	-0.000813741			0.191	0.196453	0.103547	0.0997288			0.191	0.08573	0.09082	0.73607			0.191
	0.192	-0.0759024	-0.0606302	-0.170081	-0.036449	-0.124265	-0.0288129			0.192	0.0437304	0.0157312	0.0233674	0.0233674	-0.00972257	-0.00717719			0.192	0.00173164	0.103547	0.0119132	0.0220947	0.0844565	0.0131859			0.192	0.00173164	0.103547	-0.00717719	0.00809509	-0.0135406	-0.00335912			0.192	0.206635	0.0895472	0.117546			0.192	0.07809	0.11373	0.73607			0.192
	0.193	-0.0911747	-0.0568121	-0.1599	-0.0288129	-0.124265	-0.0339037			0.193	0.037367	0.0259127	0.00936778	0.0182766	0.0106405	0.00173164			0.193	0.00809509	0.0806384	0.020822	0.00173164	0.0908199	0.0246401			0.193	0.00809509	0.0806384	0.00809509	-0.000813741	0.0106405	-0.0059045			0.193	0.201544	0.0857292	0.10991			0.193	0.08955	0.15191	0.70553			0.193
	0.194	-0.102629	-0.0682663	-0.162445	-0.0428125	-0.142082	-0.0389944			0.194	0.0386396	0.0170039	0.00427702	0.0246401	0.00554971	-0.00463181			0.194	0.00554971	0.0793657	0.0119132	0.00300433	0.094638	0.0119132			0.194	0.00554971	0.0793657	0.000458949	0.0195493	0.0068224	0.00173164			0.194	0.200271	0.101001	0.103547			0.194	0.073	0.18627	0.71444			0.194
	0.195	-0.0911747	-0.0708117	-0.167536	-0.0415398	-0.130628	-0.0313583			0.195	0.0386396	0.0195493	0.0182766	0.00936778	0.0131859	-0.00717719			0.195	-0.00717719	0.107365	0.00300433	-0.00335912	0.103547	0.0284581			0.195	-0.00717719	0.107365	0.00173164	0.0157312	0.00427702	-0.00463181			0.195	0.211725	0.0920926	0.118819			0.195	0.09464	0.19645	0.75262			0.195
	0.196	-0.0746297	-0.0669936	-0.180263	-0.0313583	-0.131901	-0.0339037			0.196	0.0513665	0.0310035	0.0068224	0.00554971	-0.00208643	-0.016086			0.196	-0.0199041	0.0997288	0.0106405	0.0195493	0.0895472	0.0246401			0.196	-0.0199041	0.0997288	-0.00972257	0.00809509	0.0119132	-0.00463181			0.196	0.192635	0.0933653	0.113728			0.196	0.073	0.20027	0.77425			0.196
	0.197	-0.0988109	-0.052994	-0.163718	-0.0402671	-0.144628	-0.0275402			0.197	0.0386396	0.0246401	0.0157312	0.00809509	-0.00717719	0.0106405			0.197	0.000458949	0.0819111	0.00427702	0.0195493	0.0844565	0.0233674			0.197	0.000458949	0.0819111	0.0106405	-0.000813741	-0.00972257	0.0068224			0.197	0.188817	0.0997288	0.0997288			0.197	0.06918	0.20154	0.81371			0.197
	0.198	-0.089902	-0.0568121	-0.154809	-0.0339037	-0.12681	-0.0288129			0.198	0.0450031	0.0157312	0.0106405	0.0195493	0.00427702	-0.00208643			0.198	0.0106405	0.0971834	0.0284581	0.00427702	0.102274	0.0144585			0.198	0.0106405	0.0971834	-0.00844988	-0.00208643	-0.00717719	0.00427702			0.198	0.196453	0.0971834	0.102274			0.198	0.07682	0.18882	0.82516			0.198
	0.199	-0.0886293	-0.0644482	-0.1599	-0.0377217	-0.153536	-0.0389944			0.199	0.0360943	0.0220947	0.00809509	0.0119132	-0.00972257	0.0106405			0.199	0.00809509	0.0920926	0.0246401	0.0106405	0.0691842	0.0119132			0.199	0.00809509	0.0920926	-0.0199041	0.0068224	0.0068224	-0.0122679			0.199	0.186272	0.112456	0.0997288			0.199	0.07682	0.14045	0.82134			0.199
	0.2	-0.0975382	-0.0669936	-0.1739	-0.0377217	-0.130628	-0.0428125			0.2	0.0360943	0.0233674	0.0068224	0.0182766	0.0233674	-0.00844988			0.2	-0.00717719	0.0984561	0.0233674	0.00300433	0.0882745	0.0271854			0.2	-0.00717719	0.0984561	0.0106405	0.0106405	-0.00463181	-0.00463181			0.2	0.205362	0.0793657	0.104819			0.2	0.07555	0.09718	0.83789			0.2
	0.201	-0.0924474	-0.0580848	-0.170081	-0.0517213	-0.142082	-0.0288129			0.201	0.0500939	0.0335489	0.0106405	0.00554971	0.0182766	0.00427702			0.201	-0.00335912	0.0870019	0.0068224	0.0182766	0.0920926	0.0131859			0.201	-0.00335912	0.0870019	-0.00844988	0.00427702	0.00936778	0.00427702			0.201	0.187544	0.0895472	0.120092			0.201	0.08827	0.06664	0.80353			0.201
	0.202	-0.0911747	-0.0593575	-0.1739	-0.0288129	-0.120447	-0.0453579			0.202	0.0437304	0.0170039	0.00300433	0.0310035	0.000458949	-0.00463181			0.202	-0.000813741	0.0920926	0.0195493	-0.00463181	0.0920926	0.020822			0.202	-0.000813741	0.0920926	0.00173164	0.00300433	0.00936778	-0.00717719			0.202	0.192635	0.094638	0.108638			0.202	0.08318	0.05518	0.80989			0.202
	0.203	-0.086084	-0.0759024	-0.171354	-0.0517213	-0.139537	-0.0186314			0.203	0.037367	0.0157312	0.0068224	0.0131859	-0.0059045	-0.00463181			0.203	-0.0122679	0.0819111	0.0182766	0.00427702	0.0844565	0.00554971			0.203	-0.0122679	0.0819111	0.0068224	-0.00335912	0.0106405	0.020822			0.203	0.201544	0.0844565	0.0920926			0.203	0.08318	0.02591	0.78316			0.203
	0.204	-0.105174	-0.0669936	-0.163718	-0.0224495	-0.129355	-0.0466306			0.204	0.0348216	0.0220947	0.0284581	0.0119132	-0.00972257	0.00554971			0.204	0.0106405	0.115001	0.0157312	0.0131859	0.0984561	0.0157312			0.204	0.0106405	0.115001	0.0157312	0.0068224	0.000458949	-0.000813741			0.204	0.197726	0.0933653	0.111183			0.204	0.09718	0.03737	0.76407			0.204
	0.205	-0.100084	-0.0555394	-0.154809	-0.0415398	-0.124265	-0.0313583			0.205	0.0360943	0.0259127	0.00936778	0.0271854	0.00427702	-0.0135406			0.205	-0.00208643	0.0882745	0.0131859	0.0170039	0.0984561	0.0119132			0.205	-0.00208643	0.0882745	-0.0199041	0.00300433	0.00300433	0.00554971			0.205	0.221907	0.0984561	0.121365			0.205	0.073	0.05137	0.71826			0.205
	0.206	-0.0962655	-0.0644482	-0.170081	-0.0249948	-0.134446	-0.0440852			0.206	0.041185	0.0259127	-0.00717719	0.00936778	-0.000813741	-0.0109953			0.206	0.00173164	0.103547	0.0119132	0.00554971	0.0984561	0.0119132			0.206	0.00173164	0.103547	0.000458949	0.0170039	-0.00717719	-0.0135406			0.206	0.19009	0.0959107	0.0971834			0.206	0.08191	0.06918	0.6928			0.206
	0.207	-0.0835386	-0.0555394	-0.166263	-0.0339037	-0.139537	-0.0199041			0.207	0.0475485	0.0284581	0.0157312	0.0068224	0.0170039	0.00427702			0.207	-0.000813741	0.104819	0.0131859	0.0106405	0.0971834	0.0271854			0.207	-0.000813741	0.104819	-0.00335912	0.00300433	0.00300433	0.0170039			0.207	0.193908	0.103547	0.0997288			0.207	0.09209	0.08827	0.69026			0.207
	0.208	-0.105174	-0.0631755	-0.1599	-0.0275402	-0.129355	-0.0109953			0.208	0.0399123	0.0144585	0.0144585	0.0195493	-0.00335912	-0.000813741			0.208	-0.00208643	0.0857292	0.0195493	0.00809509	0.101001	0.0157312			0.208	-0.00208643	0.0857292	0.0106405	-0.0109953	-0.00208643	-0.00335912			0.208	0.195181	0.106092	0.107365			0.208	0.08064	0.12391	0.66989			0.208
	0.209	-0.0937201	-0.0580848	-0.166263	-0.0339037	-0.125537	-0.0339037			0.209	0.0450031	0.0233674	0.00809509	0.0233674	0.00300433	-0.0109953			0.209	-0.0109953	0.0984561	0.0182766	0.0131859	0.0959107	0.0119132			0.209	-0.0109953	0.0984561	-0.0109953	0.0144585	-0.0059045	-0.00335912			0.209	0.191362	0.0870019	0.0971834			0.209	0.09082	0.19264	0.66353			0.209
	0.21	-0.0822659	-0.0466306	-0.170081	-0.0402671	-0.136991	-0.0249948			0.21	0.037367	0.0233674	0.0182766	0.0195493	-0.00335912	0.0068224			0.21	0.0119132	0.0997288	0.0233674	0.0131859	0.0882745	0.0182766			0.21	0.0119132	0.0997288	0.0119132	-0.00208643	0.00809509	0.00427702			0.21	0.210453	0.0882745	0.104819			0.21	0.08318	0.22573	0.69026			0.21
	0.211	-0.103902	-0.0593575	-0.1599	-0.0377217	-0.12681	-0.0504486			0.211	0.0348216	0.0259127	0.0119132	0.0182766	0.0157312	0.0131859			0.211	0.000458949	0.0844565	0.0246401	0.0144585	0.103547	0.0220947			0.211	0.000458949	0.0844565	0.00554971	0.0195493	-0.000813741	-0.00717719			0.211	0.196453	0.102274	0.0997288			0.211	0.08573	0.23336	0.69535			0.211
	0.212	-0.086084	-0.0428125	-0.1599	-0.036449	-0.138264	-0.0440852			0.212	0.0335489	0.0246401	-0.00335912	0.0131859	0.00300433	0.00554971			0.212	0.00936778	0.0844565	0.0271854	0.00173164	0.0882745	0.0144585			0.212	0.00936778	0.0844565	-0.000813741	0.00936778	0.00173164	0.0119132			0.212	0.195181	0.094638	0.102274			0.212	0.07427	0.25882	0.71062			0.212
	0.213	-0.10772	-0.0517213	-0.162445	-0.0377217	-0.142082	-0.0275402			0.213	0.0462758	0.0195493	0.00554971	0.0233674	0.00936778	-0.00717719			0.213	-0.0109953	0.0997288	0.0119132	0.00300433	0.0997288	0.0170039			0.213	-0.0109953	0.0997288	0.00173164	-0.00335912	0.000458949	0.00936778			0.213	0.198998	0.0959107	0.0971834			0.213	0.06409	0.28554	0.75516			0.213
	0.214	-0.0835386	-0.0580848	-0.168809	-0.0351764	-0.129355	-0.0313583			0.214	0.037367	0.0259127	0.00554971	0.0106405	-0.00208643	-0.00335912			0.214	-0.000813741	0.0870019	0.0182766	0.00809509	0.0857292	0.0195493			0.214	-0.000813741	0.0870019	-0.0135406	0.00173164	0.0131859	0.0068224			0.214	0.193908	0.106092	0.108638			0.214	0.08446	0.27281	0.81244			0.214
	0.215	-0.0886293	-0.049176	-0.164991	-0.0377217	-0.14081	-0.0453579			0.215	0.0424577	0.0246401	0.0131859	0.0271854	0.0144585	-0.000813741			0.215	0.00554971	0.0971834	0.00300433	0.020822	0.0933653	0.0271854			0.215	0.00554971	0.0971834	0.00173164	-0.00717719	0.00554971	-0.00208643			0.215	0.182454	0.0933653	0.10991			0.215	0.08191	0.26136	0.79716			0.215
	0.216	-0.0886293	-0.0580848	-0.154809	-0.0415398	-0.124265	-0.0402671			0.216	0.037367	0.0233674	0.0297308	0.0170039	0.00427702	-0.00717719			0.216	0.00173164	0.0933653	0.0170039	0.0233674	0.0971834	0.0068224			0.216	0.00173164	0.0933653	-0.00972257	0.00554971	-0.0059045	-0.0109953			0.216	0.207907	0.101001	0.101001			0.216	0.08318	0.241	0.84552			0.216
	0.217	-0.106447	-0.032631	-0.153536	-0.0415398	-0.143355	-0.0300856			0.217	0.0348216	0.0284581	0.0106405	0.0119132	0.00173164	-0.0109953			0.217	0.000458949	0.0895472	0.0182766	0.00936778	0.0895472	0.0157312			0.217	0.000458949	0.0895472	0.00809509	0.0131859	0.00300433	0.0144585			0.217	0.193908	0.0933653	0.112456			0.217	0.04882	0.19645	0.84425			0.217
	0.218	-0.105174	-0.0440852	-0.177718	-0.0402671	-0.130628	-0.0313583			0.218	0.0322762	0.0233674	0.0144585	0.0195493	0.0068224	-0.0148133			0.218	-0.00463181	0.106092	0.0233674	0.00809509	0.0882745	0.0182766			0.218	-0.00463181	0.106092	0.000458949	-0.00717719	-0.00717719	-0.00463181			0.218	0.211725	0.0908199	0.0971834			0.218	0.09082	0.17864	0.83025			0.218
	0.219	-0.111538	-0.0644482	-0.167536	-0.0389944	-0.135719	-0.0275402			0.219	0.0424577	0.0233674	0.0119132	0.00300433	0.000458949	0.00300433			0.219	0.00173164	0.101001	0.00809509	0.0131859	0.101001	0.0195493			0.219	0.00173164	0.101001	0.00427702	0.00173164	0.0068224	-0.00972257			0.219	0.193908	0.0920926	0.101001			0.219	0.08191	0.15191	0.82643			0.219
	0.22	-0.0962655	-0.0644482	-0.1599	-0.0262675	-0.143355	-0.0313583			0.22	0.0488212	0.0233674	-0.00208643	0.0144585	-0.000813741	0.00427702			0.22	0.0068224	0.0882745	-0.00844988	0.00300433	0.0819111	0.0195493			0.22	0.0068224	0.0882745	0.00809509	0.00809509	-0.0059045	-0.0122679			0.22	0.202817	0.101001	0.0971834			0.22	0.08955	0.13409	0.82007			0.22
	0.221	-0.089902	-0.0542667	-0.153536	-0.0466306	-0.130628	-0.032631			0.221	0.0513665	0.0271854	0.00300433	0.00809509	0.0119132	-0.00463181			0.221	-0.0109953	0.101001	0.0386396	0.00554971	0.0908199	0.0297308			0.221	-0.0109953	0.101001	0.00809509	0.000458949	-0.00844988	0.00300433			0.221	0.183726	0.102274	0.0971834			0.221	0.06537	0.12773	0.79207			0.221
	0.222	-0.0911747	-0.0593575	-0.158627	-0.052994	-0.110265	-0.0339037			0.222	0.041185	0.0195493	0.0182766	0.0170039	-0.00463181	-0.0059045			0.222	-0.00844988	0.0895472	0.0106405	-0.00463181	0.0920926	0.0170039			0.222	-0.00844988	0.0895472	0.00936778	0.020822	0.00554971	0.00300433			0.222	0.201544	0.0908199	0.103547			0.222	0.08955	0.10736	0.75007			0.222
	0.223	-0.0949928	-0.0453579	-0.163718	-0.0415398	-0.135719	-0.0339037			0.223	0.0386396	0.0220947	0.0170039	0.0106405	-0.00717719	-0.00208643			0.223	0.00173164	0.0870019	0.0271854	0.0106405	0.0895472	0.0233674			0.223	0.00173164	0.0870019	0.00300433	0.0119132	0.00554971	-0.0109953			0.223	0.196453	0.107365	0.0997288			0.223	0.09464	0.12009	0.7348			0.223
	0.224	-0.0937201	-0.0428125	-0.164991	-0.049176	-0.138264	-0.032631			0.224	0.0386396	0.0233674	0.00936778	0.0246401	0.0157312	0.00300433			0.224	0.00300433	0.0971834	0.0068224	0.0157312	0.0984561	0.0386396			0.224	0.00300433	0.0971834	0.00936778	-0.000813741	0.0068224	0.0106405			0.224	0.195181	0.0831838	0.102274			0.224	0.09337	0.14555	0.70935			0.224
	0.225	-0.0937201	-0.0555394	-0.166263	-0.0288129	-0.129355	-0.0428125			0.225	0.037367	0.020822	0.0157312	0.0119132	0.0106405	0.0068224			0.225	0.00173164	0.0959107	0.0157312	0.0131859	0.0984561	0.0106405			0.225	0.00173164	0.0959107	-0.00717719	0.0119132	-0.0173587	0.0131859			0.225	0.186272	0.078093	0.0997288			0.225	0.06409	0.16464	0.68008			0.225
	0.226	-0.0937201	-0.0389944	-0.164991	-0.0428125	-0.136991	-0.0389944			0.226	0.0437304	0.0233674	-0.00208643	0.0170039	-0.00463181	-0.00717719			0.226	-0.0122679	0.0920926	0.0220947	0.0170039	0.094638	0.00427702			0.226	-0.0122679	0.0920926	0.0144585	-0.00335912	0.0119132	0.000458949			0.226	0.206635	0.0895472	0.0997288			0.226	0.08446	0.18627	0.69407			0.226
	0.227	-0.0937201	-0.0542667	-0.148446	-0.032631	-0.125537	-0.0288129			0.227	0.041185	0.0284581	0.0144585	0.0322762	-0.0135406	-0.00717719			0.227	0.00173164	0.0959107	0.0106405	0.00554971	0.0831838	0.0182766			0.227	0.00173164	0.0959107	-0.00717719	-0.0109953	0.00300433	0.0106405			0.227	0.191362	0.094638	0.108638			0.227	0.07682	0.21682	0.69407			0.227
	0.228	-0.0975382	-0.052994	-0.161173	-0.0466306	-0.139537	-0.0339037			0.228	0.0348216	0.0220947	0.00554971	0.0233674	0.0157312	-0.00972257			0.228	-0.000813741	0.0997288	0.00427702	0.000458949	0.0831838	0.0131859			0.228	-0.000813741	0.0997288	0.00554971	0.00936778	-0.00463181	-0.00844988			0.228	0.198998	0.111183	0.107365			0.228	0.07809	0.21427	0.69407			0.228
	0.229	-0.103902	-0.0568121	-0.163718	-0.0313583	-0.130628	-0.0122679			0.229	0.0310035	0.0259127	0.0284581	0.000458949	0.0131859	-0.00208643			0.229	0.00427702	0.0920926	0.0144585	0.0195493	0.0971834	0.0170039			0.229	0.00427702	0.0920926	0.00300433	0.00300433	0.00173164	-0.00717719			0.229	0.193908	0.0831838	0.103547			0.229	0.09718	0.22954	0.72589			0.229
	0.23	-0.0911747	-0.0453579	-0.154809	-0.0300856	-0.139537	-0.0313583			0.23	0.0399123	0.00936778	-0.000813741	0.0182766	-0.00335912	-0.00463181			0.23	0.0131859	0.0870019	0.020822	0.00300433	0.0908199	0.0310035			0.23	0.0131859	0.0870019	0.00173164	-0.000813741	0.00173164	0.0119132			0.23	0.201544	0.0806384	0.10991			0.23	0.07555	0.24227	0.75007			0.23
	0.231	-0.0886293	-0.0580848	-0.162445	-0.036449	-0.130628	-0.0339037			0.231	0.0360943	0.020822	-0.00717719	0.0170039	-0.000813741	-0.00208643			0.231	-0.000813741	0.0882745	0.0233674	0.0170039	0.0971834	0.00300433			0.231	-0.000813741	0.0882745	0.00300433	0.0068224	-0.00208643	0.0106405			0.231	0.202817	0.0933653	0.0984561			0.231	0.07427	0.24609	0.80989			0.231
	0.232	-0.0949928	-0.0453579	-0.152264	-0.0249948	-0.134446	-0.036449			0.232	0.041185	0.0322762	0.0106405	0.00809509	0.00300433	-0.0186314			0.232	0.00427702	0.0933653	0.0182766	0.0246401	0.0870019	0.0119132			0.232	0.00427702	0.0933653	0.0119132	0.0131859	0.00300433	0.00173164			0.232	0.196453	0.0908199	0.113728			0.232	0.09337	0.199	0.82134			0.232
	0.233	-0.0962655	-0.0479033	-0.162445	-0.0351764	-0.136991	-0.0351764			0.233	0.0386396	0.0310035	0.0170039	0.00809509	0.0119132	0.00173164			0.233	-0.0122679	0.104819	0.0182766	0.0182766	0.0857292	0.0144585			0.233	-0.0122679	0.104819	-0.016086	-0.0135406	0.000458949	-0.0059045			0.233	0.200271	0.0997288	0.108638			0.233	0.09209	0.19518	0.83025			0.233
	0.234	-0.0784478	-0.0593575	-0.170081	-0.0351764	-0.130628	-0.0466306			0.234	0.0450031	0.0259127	0.0068224	0.00809509	0.000458949	-0.000813741			0.234	-0.00208643	0.111183	0.00554971	0.00554971	0.101001	0.0195493			0.234	-0.00208643	0.111183	0.00300433	-0.00208643	0.0119132	0.00173164			0.234	0.187544	0.0959107	0.0933653			0.234	0.07682	0.14173	0.83916			0.234
	0.235	-0.0937201	-0.0568121	-0.167536	-0.0275402	-0.130628	-0.0262675			0.235	0.0360943	0.0195493	0.0259127	0.0106405	0.0068224	0.00554971			0.235	0.00554971	0.0870019	0.00427702	0.0106405	0.0793657	0.0195493			0.235	0.00554971	0.0870019	-0.00844988	0.00300433	-0.000813741	0.00300433			0.235	0.193908	0.0984561	0.108638			0.235	0.08446	0.11627	0.8188			0.235
	0.236	-0.0911747	-0.0542667	-0.161173	-0.0377217	-0.128083	-0.0237222			0.236	0.0513665	0.0182766	0.00300433	0.0170039	-0.0059045	-0.0122679			0.236	0.00554971	0.0933653	0.0144585	0.00809509	0.102274	0.0220947			0.236	0.00554971	0.0933653	0.00809509	0.00809509	-0.00844988	0.00427702			0.236	0.200271	0.0882745	0.0997288			0.236	0.07555	0.09337	0.79844			0.236
	0.237	-0.0962655	-0.0517213	-0.170081	-0.0237222	-0.133174	-0.0466306			0.237	0.0386396	0.0297308	0.0182766	0.0157312	-0.00208643	0.0068224			0.237	0.00936778	0.0882745	0.0131859	0.00936778	0.0819111	0.0233674			0.237	0.00936778	0.0882745	-0.00717719	0.00936778	-0.0109953	0.00427702			0.237	0.191362	0.094638	0.107365			0.237	0.07427	0.06918	0.78189			0.237
	0.238	-0.0911747	-0.0631755	-0.158627	-0.0351764	-0.12681	-0.0300856			0.238	0.0259127	0.0220947	0.00554971	0.0170039	0.00427702	-0.0109953			0.238	0.00427702	0.0870019	0.0195493	0.0220947	0.0984561	0.0170039			0.238	0.00427702	0.0870019	-0.00844988	0.0106405	-0.000813741	-0.00463181			0.238	0.200271	0.0920926	0.101001			0.238	0.073	0.05137	0.73989			0.238
	0.239	-0.0848113	-0.0657209	-0.1599	-0.0440852	-0.130628	-0.0288129			0.239	0.0284581	0.0271854	0.0106405	0.0144585	0.00936778	-0.000813741			0.239	-0.00463181	0.0819111	0.00300433	0.0157312	0.0691842	0.0233674			0.239	-0.00463181	0.0819111	-0.00972257	-0.00844988	0.0157312	0.00173164			0.239	0.187544	0.0908199	0.102274			0.239	0.08573	0.05264	0.71444			0.239
	0.24	-0.105174	-0.0440852	-0.157355	-0.0402671	-0.134446	-0.0313583			0.24	0.0399123	0.0170039	0.0068224	0.0131859	0.0170039	0.000458949			0.24	-0.00717719	0.094638	0.0170039	0.0106405	0.106092	0.0157312			0.24	-0.00717719	0.094638	0.0119132	0.00173164	0.0119132	0.0119132			0.24	0.196453	0.094638	0.0895472			0.24	0.08064	0.07046	0.66098			0.24
	0.241	-0.089902	-0.0619029	-0.177718	-0.049176	-0.143355	-0.0377217			0.241	0.0399123	0.0182766	0.00554971	0.020822	0.00300433	0.00173164			0.241	-0.00463181	0.0920926	0.0144585	0.0157312	0.0857292	0.0233674			0.241	-0.00463181	0.0920926	-0.0059045	-0.000813741	0.00173164	-0.0109953			0.241	0.200271	0.0870019	0.113728			0.241	0.08827	0.09082	0.65462			0.241
	0.242	-0.0988109	-0.0619029	-0.156082	-0.0351764	-0.154809	-0.0288129			0.242	0.0386396	0.0157312	0.0068224	0.0170039	0.00173164	-0.00463181			0.242	0.00300433	0.094638	0.0195493	0.00809509	0.0882745	0.0233674			0.242	0.00300433	0.094638	0.00427702	0.00936778	0.00300433	0.000458949			0.242	0.195181	0.094638	0.102274			0.242	0.08446	0.14555	0.64444			0.242
	0.243	-0.0822659	-0.052994	-0.171354	-0.0389944	-0.128083	-0.0237222			0.243	0.0386396	0.0335489	0.0131859	0.0297308	0.00300433	-0.0109953			0.243	0.0106405	0.0959107	0.0182766	0.00936778	0.0844565	0.0170039			0.243	0.0106405	0.0959107	0.000458949	-0.00208643	-0.00717719	0.00427702			0.243	0.193908	0.0844565	0.107365			0.243	0.07173	0.16973	0.65717			0.243
	0.244	-0.0937201	-0.0440852	-0.153536	-0.0224495	-0.121719	-0.0135406			0.244	0.041185	0.0246401	-0.0059045	0.0106405	0.0131859	-0.00335912			0.244	-0.00463181	0.0920926	0.0170039	0.00300433	0.094638	0.0144585			0.244	-0.00463181	0.0920926	-0.016086	-0.000813741	-0.00463181	0.00427702			0.244	0.195181	0.0997288	0.111183			0.244	0.08827	0.19391	0.6508			0.244
	0.245	-0.0924474	-0.0479033	-0.156082	-0.0351764	-0.124265	-0.049176			0.245	0.0462758	0.0119132	0.0170039	0.0157312	-0.00208643	-0.00717719			0.245	-0.00717719	0.0882745	0.0144585	0.0182766	0.0895472	0.00809509			0.245	-0.00717719	0.0882745	0.00554971	-0.00208643	0.0068224	-0.000813741			0.245	0.200271	0.0920926	0.106092			0.245	0.08191	0.22573	0.68008			0.245
	0.246	-0.0962655	-0.0593575	-0.168809	-0.0313583	-0.130628	-0.0173587			0.246	0.0424577	0.020822	0.0170039	0.0335489	-0.00208643	-0.00844988			0.246	0.0068224	0.0882745	0.00427702	0.00173164	0.0933653	0.0119132			0.246	0.0068224	0.0882745	0.0119132	-0.000813741	0.0144585	-0.00844988			0.246	0.188817	0.0908199	0.111183			0.246	0.08827	0.213	0.71062			0.246
	0.247	-0.103902	-0.0453579	-0.150991	-0.0339037	-0.125537	-0.0428125			0.247	0.037367	0.020822	0.0068224	0.0131859	0.00554971	0.0068224			0.247	-0.000813741	0.0793657	0.00173164	0.0157312	0.0895472	-0.000813741			0.247	-0.000813741	0.0793657	-0.0224495	0.0106405	-0.0109953	0.00554971			0.247	0.183726	0.0933653	0.10991			0.247	0.08446	0.23336	0.75135			0.247
	0.248	-0.089902	-0.0593575	-0.167536	-0.049176	-0.131901	-0.032631			0.248	0.0386396	0.0195493	0.0157312	0.0170039	0.0182766	0.00427702			0.248	-0.000813741	0.0984561	0.0106405	-0.00463181	0.0870019	0.0182766			0.248	-0.000813741	0.0984561	0.0119132	0.0119132	0.000458949	0.0106405			0.248	0.192635	0.102274	0.0908199			0.248	0.06918	0.227	0.7908			0.248
	0.249	-0.089902	-0.0580848	-0.164991	-0.0580848	-0.130628	-0.032631			0.249	0.0488212	0.020822	0.0271854	0.0233674	0.0144585	-0.0135406			0.249	0.00300433	0.102274	0.0195493	0.0131859	0.0895472	0.0233674			0.249	0.00300433	0.102274	-0.000813741	0.00300433	-0.00844988	0.0119132			0.249	0.178636	0.0730023	0.0971834			0.249	0.08064	0.199	0.78825			0.249
	0.25	-0.089902	-0.0631755	-0.150991	-0.0249948	-0.133174	-0.0402671			0.25	0.0360943	0.0284581	0.0131859	0.0144585	-0.00463181	-0.0059045			0.25	0.00300433	0.0870019	0.0246401	0.0119132	0.0870019	0.0195493			0.25	0.00300433	0.0870019	0.000458949	-0.00717719	0.0119132	-0.00335912			0.25	0.202817	0.101001	0.0959107			0.25	0.08446	0.19009	0.80734			0.25
	0.251	-0.105174	-0.0619029	-0.164991	-0.0173587	-0.135719	-0.0428125			0.251	0.0348216	0.0233674	0.0157312	0.0157312	0.00300433	0.00809509			0.251	-0.00208643	0.0831838	0.0246401	0.0157312	0.103547	0.0220947			0.251	-0.00208643	0.0831838	-0.00717719	-0.00717719	0.00809509	0.0170039			0.251	0.17609	0.0857292	0.0895472			0.251	0.073	0.129	0.81371			0.251
	0.252	-0.089902	-0.0593575	-0.1599	-0.0377217	-0.14081	-0.0402671			0.252	0.037367	0.020822	0.00936778	0.0246401	0.00936778	-0.00208643			0.252	0.00554971	0.0895472	-0.0109953	0.0144585	0.0882745	0.0119132			0.252	0.00554971	0.0895472	0.0068224	0.0119132	0.000458949	0.0068224			0.252	0.198998	0.0933653	0.108638			0.252	0.07937	0.11246	0.82898			0.252
	0.253	-0.0835386	-0.0517213	-0.156082	-0.0466306	-0.128083	-0.0237222			0.253	0.0335489	0.0297308	0.0119132	0.0157312	0.00427702	-0.0109953			0.253	-0.00208643	0.107365	0.0297308	0.000458949	0.094638	0.0119132			0.253	-0.00208643	0.107365	0.00173164	0.00936778	0.000458949	0.00300433			0.253	0.196453	0.107365	0.102274			0.253	0.08446	0.10991	0.7908			0.253
	0.254	-0.0873566	-0.0619029	-0.175172	-0.0186314	-0.134446	-0.0377217			0.254	0.0386396	0.0182766	0.0170039	0.0233674	0.00809509	0.0068224			0.254	0.0170039	0.0895472	0.0233674	0.00427702	0.101001	0.0259127			0.254	0.0170039	0.0895472	0.00427702	0.00300433	0.00300433	-0.00844988			0.254	0.192635	0.0882745	0.112456			0.254	0.07809	0.08191	0.78189			0.254
	0.255	-0.0784478	-0.0504486	-0.157355	-0.0377217	-0.133174	-0.0237222			0.255	0.037367	0.0220947	0.0157312	0.0246401	-0.0109953	-0.0173587			0.255	-0.000813741	0.0959107	0.00809509	0.0348216	0.094638	0.0271854			0.255	-0.000813741	0.0959107	-0.00844988	0.00173164	-0.00463181	0.00300433			0.255	0.187544	0.0882745	0.0933653			0.255	0.07682	0.07427	0.72716			0.255
	0.256	-0.0822659	-0.0504486	-0.152264	-0.0351764	-0.129355	-0.0313583			0.256	0.0297308	0.0220947	0.0157312	0.0119132	0.00554971	-0.0122679			0.256	-0.0109953	0.0806384	0.0220947	0.00809509	0.0895472	0.0246401			0.256	-0.0109953	0.0806384	0.00936778	0.0182766	0.00427702	0.0106405			0.256	0.196453	0.0984561	0.0997288			0.256	0.08955	0.07937	0.69407			0.256
	0.257	-0.103902	-0.0580848	-0.164991	-0.0351764	-0.143355	-0.0351764			0.257	0.0335489	0.0284581	0.0170039	0.00554971	0.0119132	0.0119132			0.257	0.0106405	0.0920926	0.0246401	-0.0059045	0.0920926	0.0233674			0.257	0.0106405	0.0920926	0.00809509	0.00936778	-0.00208643	-0.00844988			0.257	0.188817	0.0895472	0.108638			0.257	0.08827	0.08446	0.69789			0.257
	0.258	-0.0911747	-0.0619029	-0.161173	-0.0288129	-0.124265	-0.036449			0.258	0.041185	0.0157312	0.0144585	0.020822	-0.00717719	-0.00335912			0.258	-0.00335912	0.0870019	0.00300433	0.0106405	0.0882745	0.0271854			0.258	-0.00335912	0.0870019	0.00809509	-0.0059045	0.00173164	-0.0059045			0.258	0.186272	0.0895472	0.0908199			0.258	0.08446	0.13791	0.66353			0.258
	0.259	-0.0937201	-0.0644482	-0.1599	-0.0300856	-0.114083	-0.0249948			0.259	0.041185	0.020822	0.0195493	0.0259127	0.00427702	0.00173164			0.259	0.00173164	0.0933653	0.0144585	-0.000813741	0.0857292	0.0170039			0.259	0.00173164	0.0933653	0.00427702	0.0068224	0.0144585	0.0119132			0.259	0.170999	0.0971834	0.0984561			0.259	0.08318	0.16336	0.66862			0.259
	0.26	-0.0911747	-0.0631755	-0.171354	-0.0313583	-0.142082	-0.032631			0.26	0.0360943	0.0195493	0.00936778	0.0233674	0.00427702	-0.00717719			0.26	-0.0122679	0.0895472	0.0119132	0.00427702	0.101001	0.0157312			0.26	-0.0122679	0.0895472	0.000458949	0.0131859	-0.00717719	-0.00335912			0.26	0.211725	0.0691842	0.0959107			0.26	0.07809	0.22063	0.6648			0.26
	0.261	-0.0911747	-0.052994	-0.147173	-0.049176	-0.131901	-0.0313583			0.261	0.0475485	0.0284581	0.00809509	0.00554971	0.0119132	-0.00208643			0.261	0.00300433	0.0984561	0.0144585	0.0068224	0.101001	0.00427702			0.261	0.00300433	0.0984561	-0.00208643	0.00427702	0.00554971	0.0119132			0.261	0.184999	0.0806384	0.104819			0.261	0.08191	0.21045	0.68644			0.261
	0.262	-0.0988109	-0.0657209	-0.17899	-0.0339037	-0.134446	-0.0275402			0.262	0.0399123	0.0195493	0.0144585	0.0297308	0.0106405	-0.00335912			0.262	-0.0059045	0.0882745	0.00809509	0.00173164	0.0908199	0.0131859			0.262	-0.0059045	0.0882745	0.00809509	-0.00208643	-0.00463181	-0.00335912			0.262	0.193908	0.0933653	0.101001			0.262	0.08064	0.24482	0.72335			0.262
	0.263	-0.0937201	-0.052994	-0.1459	-0.0453579	-0.119174	-0.0313583			0.263	0.0437304	0.0170039	0.00554971	0.00809509	-0.00972257	0.000458949			0.263	-0.00208643	0.0908199	0.0233674	-0.00208643	0.0857292	0.0195493			0.263	-0.00208643	0.0908199	0.000458949	0.00809509	-0.00335912	-0.0059045			0.263	0.186272	0.0984561	0.094638			0.263	0.07809	0.24991	0.7628			0.263
	0.264	-0.0949928	-0.0555394	-0.1599	-0.0211768	-0.125537	-0.0249948			0.264	0.0386396	0.0131859	0.00427702	0.0106405	-0.00844988	-0.00972257			0.264	-0.00208643	0.0844565	0.0220947	0.0131859	0.0908199	0.0182766			0.264	-0.00208643	0.0844565	0.0119132	0.0119132	0.00300433	0.00300433			0.264	0.191362	0.0971834	0.115001			0.264	0.09209	0.24482	0.77553			0.264
	0.265	-0.0873566	-0.0797205	-0.149718	-0.0389944	-0.125537	-0.0453579			0.265	0.0348216	0.020822	0.00300433	0.0233674	0.0157312	-0.00335912			0.265	0.00173164	0.0933653	0.0106405	0.0170039	0.0831838	0.0259127			0.265	0.00173164	0.0933653	-0.0059045	0.00300433	-0.00335912	0.00427702			0.265	0.188817	0.0933653	0.102274			0.265	0.08064	0.21173	0.82007			0.265
	0.266	-0.110265	-0.073357	-0.153536	-0.0389944	-0.1459	-0.0262675			0.266	0.0437304	0.0322762	0.0106405	0.00809509	0.00809509	-0.00844988			0.266	-0.0109953	0.0895472	0.0119132	0.00936778	0.0793657	0.0131859			0.266	-0.0109953	0.0895472	-0.000813741	0.00173164	-0.00717719	0.00427702			0.266	0.204089	0.0844565	0.101001			0.266	0.06537	0.20282	0.82389			0.266
	0.267	-0.0962655	-0.0746297	-0.1739	-0.0402671	-0.130628	-0.0377217			0.267	0.0386396	0.020822	0.0157312	0.0119132	0.00554971	0.00427702			0.267	0.00300433	0.0984561	0.0259127	-0.0109953	0.101001	0.0195493			0.267	0.00300433	0.0984561	0.000458949	0.00554971	-0.0059045	0.00936778			0.267	0.19009	0.0959107	0.0844565			0.267	0.06918	0.15827	0.8328			0.267
	0.268	-0.0949928	-0.0720844	-0.1599	-0.0339037	-0.12681	-0.0288129			0.268	0.0360943	0.0182766	0.0144585	0.00554971	0.00300433	-0.0109953			0.268	0.000458949	0.102274	0.0131859	0.00554971	0.094638	0.00936778			0.268	0.000458949	0.102274	0.00427702	0.00427702	-0.00335912	0.0131859			0.268	0.181181	0.0844565	0.0920926			0.268	0.08064	0.11627	0.82262			0.268
	0.269	-0.086084	-0.0771751	-0.1599	-0.0402671	-0.12681	-0.0351764			0.269	0.037367	0.0195493	0.0182766	0.0157312	0.00300433	0.00427702			0.269	0.000458949	0.0793657	0.00809509	0.00936778	0.0895472	0.020822			0.269	0.000458949	0.0793657	0.00554971	-0.00844988	-0.0122679	-0.00463181			0.269	0.186272	0.0920926	0.113728			0.269	0.08318	0.10864	0.81498			0.269
	0.27	-0.0759024	-0.0886293	-0.167536	-0.036449	-0.139537	-0.0351764			0.27	0.0386396	0.0195493	0.000458949	0.0119132	0.00809509	-0.0059045			0.27	-0.00717719	0.0857292	0.0157312	0.020822	0.0895472	0.0284581			0.27	-0.00717719	0.0857292	-0.00208643	0.00427702	0.0157312	-0.00335912			0.27	0.186272	0.0997288	0.0870019			0.27	0.09082	0.059	0.79971			0.27
	0.271	-0.0949928	-0.073357	-0.156082	-0.0351764	-0.114083	-0.0377217			0.271	0.0437304	0.020822	0.00936778	0.0170039	-0.00463181	-0.00335912			0.271	-0.0059045	0.0997288	0.0170039	0.00427702	0.0844565	0.0220947			0.271	-0.0059045	0.0997288	-0.00463181	0.0271854	0.0131859	-0.00208643			0.271	0.205362	0.0933653	0.113728			0.271	0.08827	0.06918	0.76535			0.271
	0.272	-0.0746297	-0.0759024	-0.149718	-0.0377217	-0.129355	-0.0186314			0.272	0.0335489	0.0284581	0.0259127	0.0233674	-0.00208643	-0.0199041			0.272	0.00173164	0.0857292	0.0131859	0.0131859	0.0882745	0.0170039			0.272	0.00173164	0.0857292	-0.000813741	0.00427702	-0.00463181	0.00173164			0.272	0.195181	0.0882745	0.0895472			0.272	0.08318	0.06409	0.73353			0.272
	0.273	-0.089902	-0.073357	-0.161173	-0.0351764	-0.139537	-0.032631			0.273	0.0322762	0.0220947	0.0157312	0.00300433	0.0068224	0.00173164			0.273	0.00936778	0.094638	0.0119132	0.00427702	0.0882745	0.0233674			0.273	0.00936778	0.094638	0.00809509	0.00300433	0.00809509	-0.00208643			0.273	0.184999	0.0882745	0.0971834			0.273	0.08446	0.09209	0.6788			0.273
	0.274	-0.0886293	-0.069539	-0.164991	-0.0428125	-0.142082	-0.032631			0.274	0.0386396	0.0220947	0.0170039	0.0106405	-0.0059045	0.00300433			0.274	0.00300433	0.094638	0.00427702	0.0170039	0.0819111	0.0182766			0.274	0.00300433	0.094638	-0.00208643	-0.00717719	-0.00335912	0.00300433			0.274	0.201544	0.0831838	0.0984561			0.274	0.073	0.10482	0.68517			0.274
	0.275	-0.0924474	-0.0759024	-0.156082	-0.0275402	-0.117901	-0.0339037			0.275	0.0399123	0.0259127	0.00427702	0.0157312	0.00173164	0.00936778			0.275	0.0106405	0.101001	0.020822	0.00554971	0.0971834	0.0220947			0.275	0.0106405	0.101001	0.00936778	-0.00717719	-0.00972257	0.00173164			0.275	0.179908	0.0933653	0.0997288			0.275	0.06918	0.16082	0.6788			0.275
	0.276	-0.100084	-0.0809932	-0.1599	-0.0453579	-0.133174	-0.0313583			0.276	0.0424577	0.0220947	0.000458949	-0.00463181	0.00300433	-0.00208643			0.276	-0.0122679	0.078093	0.00809509	0.00809509	0.0971834	0.0233674			0.276	-0.0122679	0.078093	-0.00208643	0.00936778	0.00809509	0.00554971			0.276	0.192635	0.111183	0.104819			0.276	0.08064	0.17864	0.69026			0.276
	0.277	-0.0975382	-0.0669936	-0.154809	-0.0339037	-0.124265	-0.0262675			0.277	0.0335489	0.0233674	0.00300433	0.0233674	0.00300433	-0.00208643			0.277	-0.00844988	0.0997288	0.0182766	0.0106405	0.0984561	0.0157312			0.277	-0.00844988	0.0997288	-0.00208643	-0.00463181	-0.00463181	-0.00717719			0.277	0.179908	0.0895472	0.104819			0.277	0.08064	0.20663	0.68389			0.277
	0.278	-0.103902	-0.069539	-0.168809	-0.0440852	-0.133174	-0.0402671			0.278	0.0399123	0.0220947	0.00300433	0.00554971	0.000458949	-0.000813741			0.278	0.0119132	0.0857292	0.0182766	0.00936778	0.0793657	0.0297308			0.278	0.0119132	0.0857292	0.00300433	0.00427702	-0.00208643	-0.000813741			0.278	0.192635	0.0959107	0.0882745			0.278	0.073	0.24354	0.69789			0.278
	0.279	-0.089902	-0.0784478	-0.163718	-0.0402671	-0.124265	-0.0389944			0.279	0.0386396	0.0233674	0.00300433	0.020822	0.0182766	-0.0109953			0.279	-0.00208643	0.0806384	0.000458949	-0.000813741	0.0717296	0.0297308			0.279	-0.00208643	0.0806384	0.00554971	0.00427702	-0.0059045	-0.000813741			0.279	0.187544	0.0870019	0.113728			0.279	0.087	0.23591	0.71317			0.279
	0.28	-0.0771751	-0.0797205	-0.157355	-0.0440852	-0.130628	-0.016086			0.28	0.041185	0.0182766	0.0170039	0.0170039	0.00173164	0.0119132			0.28	-0.000813741	0.0933653	0.0195493	0.00173164	0.108638	0.0233674			0.28	-0.000813741	0.0933653	-0.0122679	0.0119132	-0.00335912	0.00300433			0.28	0.191362	0.104819	0.113728			0.28	0.08446	0.26263	0.75007			0.28
	0.281	-0.0937201	-0.0708117	-0.136991	-0.0377217	-0.122992	-0.0211768			0.281	0.037367	0.0220947	0.0144585	0.00554971	0.000458949	0.00300433			0.281	0.00300433	0.0984561	0.0233674	0.0157312	0.0844565	0.0106405			0.281	0.00300433	0.0984561	-0.00463181	0.0144585	-0.00463181	-0.00717719			0.281	0.192635	0.0831838	0.0933653			0.281	0.07682	0.25245	0.80607			0.281
	0.282	-0.0886293	-0.0848113	-0.164991	-0.0389944	-0.139537	-0.0389944			0.282	0.0399123	0.0220947	-0.0135406	0.0310035	0.00300433	-0.0109953			0.282	-0.00463181	0.0819111	0.0119132	0.00809509	0.102274	0.0271854			0.282	-0.00463181	0.0819111	-0.0059045	-0.000813741	0.0182766	0.000458949			0.282	0.19009	0.0959107	0.0882745			0.282	0.07427	0.22573	0.79716			0.282
	0.283	-0.0809932	-0.0962655	-0.154809	-0.0377217	-0.130628	-0.0249948			0.283	0.0360943	0.0284581	0.0195493	0.0106405	-0.000813741	-0.0122679			0.283	-0.0186314	0.0920926	0.0182766	0.000458949	0.0844565	0.020822			0.283	-0.0186314	0.0920926	0.0157312	0.0220947	0.00173164	-0.00972257			0.283	0.181181	0.0831838	0.104819			0.283	0.08827	-0.00336	0.84043			0.283
	0.284	-0.086084	-0.086084	-0.161173	-0.0479033	-0.130628	-0.0237222			0.284	0.037367	0.0195493	-0.00717719	0.0106405	0.0068224	-0.0059045			0.284	-0.00463181	0.0895472	-0.000813741	0.0246401	0.0882745	0.00809509			0.284	-0.00463181	0.0895472	-0.0122679	0.000458949	-0.00208643	0.00173164			0.284	0.186272	0.0895472	0.0895472			0.284	0.07427	-0.34317	0.83916			0.284
	0.285	-0.0886293	-0.0924474	-0.153536	-0.036449	-0.120447	-0.0479033			0.285	0.0348216	0.0170039	-0.00717719	0.0220947	0.0068224	0.000458949			0.285	0.00809509	0.0933653	0.0259127	0.0131859	0.0959107	0.020822			0.285	0.00809509	0.0933653	-0.00463181	0.00809509	-0.00972257	0.00809509			0.285	0.186272	0.0971834	0.0984561			0.285	0.09082	-1.14242	0.81371			0.285
	0.286	-0.0784478	-0.100084	-0.170081	-0.0402671	-0.117901	-0.036449			0.286	0.0386396	0.0220947	0.0195493	0.0170039	0.00554971	0.000458949			0.286	-0.00335912	0.0895472	0.00554971	0.00809509	0.0933653	0.020822			0.286	-0.00335912	0.0895472	0.0106405	-0.00463181	0.000458949	0.00809509			0.286	0.187544	0.108638	0.0920926			0.286	0.06282	-1.95185	0.80098			0.286
	0.287	-0.0988109	-0.106447	-0.154809	-0.0339037	-0.131901	-0.0377217			0.287	0.0424577	0.0220947	0.00427702	0.00300433	0.0106405	0.00300433			0.287	0.000458949	0.0984561	0.0220947	-0.00717719	0.0819111	0.0233674			0.287	0.000458949	0.0984561	0.0220947	-0.00335912	-0.000813741	-0.00208643			0.287	0.19009	0.0640934	0.116274			0.287	0.08064	-1.56622	0.78698			0.287
	0.288	-0.100084	-0.0962655	-0.166263	-0.0339037	-0.139537	-0.0237222			0.288	0.0335489	0.0348216	0.000458949	0.00173164	-0.00463181	0.0119132			0.288	0.0144585	0.0831838	0.00427702	0.0259127	0.0933653	0.020822			0.288	0.0144585	0.0831838	-0.0122679	0.000458949	-0.00844988	-0.000813741			0.288	0.191362	0.0870019	0.0908199			0.288	0.08827	-0.71607	0.74626			0.288
	0.289	-0.0797205	-0.089902	-0.166263	-0.0275402	-0.135719	-0.0288129			0.289	0.0437304	0.0195493	0.00173164	0.0144585	-0.00335912	-0.0148133			0.289	0.00300433	0.101001	0.0131859	0.00809509	0.103547	0.0233674			0.289	0.00300433	0.101001	-0.00844988	0.00809509	0.0220947	-0.00972257			0.289	0.186272	0.0806384	0.0971834			0.289	0.10227	-0.13699	0.73989			0.289
	0.29	-0.0911747	-0.111538	-0.158627	-0.0249948	-0.128083	-0.0275402			0.29	0.0399123	0.0182766	0.0068224	0.0233674	-0.00844988	-0.00335912			0.29	0.00427702	0.0831838	0.0119132	0.0131859	0.0933653	0.0335489			0.29	0.00427702	0.0831838	-0.0224495	0.000458949	0.00936778	-0.0059045			0.29	0.184999	0.111183	0.0857292			0.29	0.06664	-0.01609	0.7208			0.29
	0.291	-0.102629	-0.086084	-0.163718	-0.0339037	-0.108992	-0.0262675			0.291	0.0386396	0.0157312	0.00809509	0.0170039	0.0170039	0.000458949			0.291	0.00554971	0.0908199	0.0131859	0.0182766	0.0895472	0.0106405			0.291	0.00554971	0.0908199	0.00809509	-0.00717719	0.00554971	0.0106405			0.291	0.196453	0.0933653	0.10991			0.291	0.08827	0.08446	0.67498			0.291
	0.292	-0.0962655	-0.0988109	-0.156082	-0.0313583	-0.120447	-0.0428125			0.292	0.0335489	0.0182766	-0.0059045	0.0182766	0.00427702	-0.0109953			0.292	0.00809509	0.0870019	0.0068224	-0.00335912	0.0831838	0.0131859			0.292	0.00809509	0.0870019	-0.00844988	-0.00208643	-0.0148133	0.00300433			0.292	0.172272	0.0984561	0.0895472			0.292	0.07937	0.14173	0.67626			0.292
	0.293	-0.0746297	-0.102629	-0.163718	-0.032631	-0.136991	-0.0288129			0.293	0.041185	0.0220947	0.0182766	0.0233674	-0.000813741	0.00300433			0.293	0.000458949	0.0933653	0.0157312	-0.000813741	0.103547	0.0259127			0.293	0.000458949	0.0933653	-0.000813741	0.00554971	-0.0135406	0.00554971			0.293	0.198998	0.0984561	0.0997288			0.293	0.07937	0.15573	0.68262			0.293
	0.294	-0.0822659	-0.0924474	-0.164991	-0.0237222	-0.128083	-0.036449			0.294	0.0437304	0.0182766	0.0182766	0.0106405	-0.00335912	-0.0059045			0.294	-0.0122679	0.0806384	0.0119132	0.00809509	0.0844565	0.0119132			0.294	-0.0122679	0.0806384	0.00173164	-0.0059045	0.00300433	0.0119132			0.294	0.200271	0.0831838	0.0997288			0.294	0.08064	0.171	0.71189			0.294
	0.295	-0.086084	-0.0937201	-0.161173	-0.0211768	-0.120447	-0.0249948			0.295	0.037367	0.0246401	-0.00972257	0.0131859	-0.0109953	0.0068224			0.295	-0.00208643	0.0984561	0.0246401	0.0170039	0.10991	0.0131859			0.295	-0.00208643	0.0984561	-0.0135406	0.00300433	0.0068224	-0.0109953			0.295	0.197726	0.106092	0.0870019			0.295	0.08573	0.17609	0.7348			0.295
	0.296	-0.0937201	-0.0962655	-0.157355	-0.0288129	-0.134446	-0.032631			0.296	0.0335489	0.0195493	-0.0122679	0.0271854	0.00300433	-0.016086			0.296	0.0131859	0.0908199	0.0106405	0.00427702	0.0933653	0.020822			0.296	0.0131859	0.0908199	-0.0109953	-0.00463181	0.00300433	0.0144585			0.296	0.169727	0.0793657	0.102274			0.296	0.07173	0.19518	0.78953			0.296
	0.297	-0.0835386	-0.110265	-0.154809	-0.0479033	-0.125537	-0.032631			0.297	0.0424577	0.0335489	-0.000813741	0.0220947	0.00300433	0.00173164			0.297	0.00936778	0.0844565	0.0195493	0.00300433	0.0806384	0.0170039			0.297	0.00936778	0.0844565	-0.00844988	0.00173164	0.000458949	-0.0135406			0.297	0.191362	0.0831838	0.0984561			0.297	0.07555	0.20027	0.82134			0.297
	0.298	-0.0873566	-0.0797205	-0.152264	-0.0415398	-0.139537	-0.0237222			0.298	0.0360943	0.0195493	0.020822	-0.000813741	0.00809509	0.00173164			0.298	-0.00208643	0.0882745	0.00936778	0.0106405	0.094638	0.0170039			0.298	-0.00208643	0.0882745	0.0068224	-0.00717719	-0.0122679	0.00809509			0.298	0.201544	0.0882745	0.0933653			0.298	0.07555	0.22063	0.82771			0.298
	0.299	-0.0937201	-0.089902	-0.176445	-0.0389944	-0.124265	-0.0211768			0.299	0.0399123	0.0182766	-0.00463181	0.0322762	-0.00844988	0.00173164			0.299	-0.00208643	0.0844565	0.0284581	0.0144585	0.0908199	0.0119132			0.299	-0.00208643	0.0844565	0.00427702	0.00300433	-0.00463181	-0.00717719			0.299	0.19009	0.0768203	0.103547			0.299	0.06791	0.22318	0.84298			0.299
	0.3	-0.0962655	-0.0988109	-0.147173	-0.0339037	-0.120447	-0.0339037			0.3	0.0386396	0.0144585	-0.0059045	0.0170039	0.000458949	-0.000813741			0.3	-0.00717719	0.0882745	0.00936778	0.0233674	0.0755476	0.0144585			0.3	-0.00717719	0.0882745	-0.0059045	0.0182766	0.000458949	0.0170039			0.3	0.186272	0.0971834	0.0984561			0.3	0.08064	0.19136	0.87607			0.3
	0.301	-0.0886293	-0.0937201	-0.156082	-0.032631	-0.116628	-0.0402671			0.301	0.037367	0.0271854	-0.00463181	0.0170039	-0.00844988	-0.0059045			0.301	0.0157312	0.0933653	0.00554971	-0.00463181	0.0882745	0.0131859			0.301	0.0157312	0.0933653	-0.0109953	-0.0059045	-0.00463181	0.00173164			0.301	0.202817	0.0908199	0.0908199			0.301	0.06409	0.15318	0.88498			0.301
	0.302	-0.0937201	-0.0988109	-0.170081	-0.0300856	-0.130628	-0.0377217			0.302	0.0462758	0.0170039	-0.0173587	0.00173164	0.00809509	-0.0059045			0.302	0.000458949	0.094638	0.0195493	0.00427702	0.0908199	0.0271854			0.302	0.000458949	0.094638	-0.00972257	-0.00335912	-0.00335912	-0.00844988			0.302	0.192635	0.094638	0.094638			0.302	0.087	0.13791	0.87098			0.302
	0.303	-0.0835386	-0.0809932	-0.166263	-0.0351764	-0.120447	-0.0275402			0.303	0.041185	0.0220947	-0.0122679	0.0119132	-0.00335912	-0.00208643			0.303	-0.00972257	0.0870019	0.0259127	-0.00208643	0.0908199	0.0182766			0.303	-0.00972257	0.0870019	-0.00844988	0.00300433	0.00809509	-0.0186314			0.303	0.17609	0.0793657	0.0971834			0.303	0.09337	0.12646	0.8468			0.303
	0.304	-0.0988109	-0.086084	-0.167536	-0.0351764	-0.133174	-0.032631			0.304	0.0310035	0.0220947	-0.00335912	0.0233674	-0.00208643	0.00173164			0.304	0.0106405	0.0920926	0.00809509	0.000458949	0.0908199	0.0119132			0.304	0.0106405	0.0920926	0.00554971	0.00936778	0.00173164	0.000458949			0.304	0.186272	0.0997288	0.0984561			0.304	0.08191	0.16591	0.81116			0.304
	0.305	-0.0962655	-0.0759024	-0.161173	-0.049176	-0.130628	-0.0339037			0.305	0.0360943	0.0233674	-0.0122679	0.020822	-0.00335912	0.00427702			0.305	-0.0148133	0.0640934	0.0131859	0.0170039	0.078093	0.020822			0.305	-0.0148133	0.0640934	-0.00717719	-0.00463181	0.00809509	-0.00335912			0.305	0.195181	0.0857292	0.0895472			0.305	0.07809	0.16973	0.75898			0.305
	0.306	-0.105174	-0.0962655	-0.164991	-0.0402671	-0.114083	-0.0377217			0.306	0.037367	0.0284581	-0.00463181	0.0170039	0.0068224	0.0068224			0.306	0.0106405	0.0933653	0.0068224	-0.000813741	0.0755476	0.0157312			0.306	0.0106405	0.0933653	-0.00208643	0.0106405	0.0233674	-0.00972257			0.306	0.188817	0.0920926	0.0933653			0.306	0.09337	0.18882	0.56935			0.306
	0.307	-0.0949928	-0.0886293	-0.161173	-0.0377217	-0.131901	-0.0186314			0.307	0.0399123	0.0297308	-0.0122679	0.0284581	0.000458949	-0.0059045			0.307	-0.0059045	0.0882745	0.0106405	0.0157312	0.0857292	0.0170039			0.307	-0.0059045	0.0882745	0.00554971	0.0195493	0.0131859	0.00554971			0.307	0.186272	0.0870019	0.103547			0.307	0.09082	0.213	0.37208			0.307
	0.308	-0.0911747	-0.105174	-0.163718	-0.0249948	-0.12681	-0.0377217			0.308	0.0437304	0.0259127	-0.0109953	0.00300433	0.00809509	0.00300433			0.308	-0.0109953	0.0971834	0.0271854	0.0131859	0.0870019	0.0157312			0.308	-0.0109953	0.0971834	0.020822	-0.00844988	0.0182766	-0.0122679			0.308	0.17609	0.106092	0.0933653			0.308	0.07937	0.21045	-0.23881			0.308
	0.309	-0.0988109	-0.0784478	-0.154809	-0.036449	-0.129355	-0.0249948			0.309	0.0386396	0.0399123	-0.00972257	0.0360943	0.00427702	0.000458949			0.309	-0.00844988	0.094638	0.0220947	0.0068224	0.074275	0.0182766			0.309	-0.00844988	0.094638	0.000458949	0.0271854	0.0399123	0.00173164			0.309	0.188817	0.0895472	0.101001			0.309	0.07937	0.27791	-1.43895			0.309
	0.31	-0.0873566	-0.0759024	-0.161173	-0.0377217	-0.130628	-0.0415398			0.31	0.037367	0.0259127	-0.0059045	0.0310035	-0.00463181	0.0106405			0.31	-0.0135406	0.0857292	-0.000813741	0.00173164	0.0870019	-0.00208643			0.31	-0.0135406	0.0857292	0.0157312	0.0259127	9.10528	-0.000813741			0.31	0.205362	0.0819111	0.0920926			0.31	0.07555	0.32754	-2.02312			0.31
	0.311	-0.0911747	-0.0962655	-0.158627	-0.0300856	-0.119174	-0.0453579			0.311	0.0462758	0.0360943	0.00554971	0.0271854	0.00300433	0.00554971			0.311	-0.00335912	0.0870019	0.0233674	0.00809509	0.078093	0.0297308			0.311	-0.00335912	0.0870019	0.041185	0.0590027	9.11037	0.0068224			0.311	0.182454	0.0959107	0.0997288			0.311	0.07937	0.33518	-1.45423			0.311
	0.312	-0.0797205	-0.0924474	-0.157355	-0.0389944	-0.143355	-0.0415398			0.312	0.0386396	0.041185	0.0119132	0.0475485	-0.945149	0.00554971			0.312	-0.00463181	0.0793657	0.0119132	0.00173164	0.0882745	0.00936778			0.312	-0.00463181	0.0793657	0.655894	0.0666388	9.11037	0.00554971			0.312	0.17609	0.0895472	0.0920926			0.312	0.08827	0.36318	-0.52134			0.312
	0.313	-0.0911747	-0.0886293	-0.157355	-0.0453579	-0.139537	-0.0211768			0.313	0.0513665	0.041185	0.0551846	0.0462758	2.64129	-0.0122679			0.313	-0.0148133	0.107365	0.00936778	0.00554971	-0.891697	0.0182766			0.313	-0.0148133	0.107365	9.11037	0.0462758	9.11419	0.0246401			0.313	0.193908	0.094638	0.0971834			0.313	0.08446	0.34027	0.25245			0.313
	0.314	-0.0937201	-0.073357	-0.148446	-0.0288129	-0.12681	-0.0275402			0.314	0.0424577	0.0335489	0.0691842	0.0450031	1.45005	0.0131859			0.314	-0.00844988	0.0984561	0.0106405	0.0170039	1.59641	0.0106405			0.314	-0.00844988	0.0984561	9.1091	0.0870019	9.11164	0.0233674			0.314	0.186272	0.0831838	0.0933653			0.314	0.07046	0.32881	0.87607			0.314
	0.315	-0.103902	-0.0771751	-0.166263	-0.0339037	-0.122992	-0.0351764			0.315	0.0297308	0.037367	0.101001	0.0462758	-0.310077	-0.0300856			0.315	-0.0122679	0.0959107	0.0195493	0.0068224	2.42366	0.020822			0.315	-0.0122679	0.0959107	9.11164	0.111183	5.99483	0.0157312			0.315	0.179908	0.094638	0.101001			0.315	0.08064	0.31227	1.01352			0.315
	0.316	-0.0988109	-0.0784478	-0.157355	-0.0402671	-0.134446	-0.0339037			0.316	0.0437304	0.0348216	0.140455	-0.826789	-0.671521	-0.139537			0.316	0.00300433	0.0997288	0.0106405	0.0144585	0.392447	0.0170039			0.316	0.00300433	0.0997288	8.56311	0.127728	2.94546	0.0297308			0.316	0.19009	0.0806384	0.0895472			0.316	0.07937	0.30336	1.08479			0.316
	0.317	-0.0822659	-0.086084	-0.163718	-0.0440852	-0.139537	-0.0377217			0.317	0.0513665	0.337722	0.125183	0.789527	-0.387711	-0.175172			0.317	-0.00717719	0.120092	0.0119132	0.0182766	-0.0937201	0.020822			0.317	-0.00717719	0.120092	5.42848	0.789527	1.38515	0.0526392			0.317	0.177363	0.0908199	0.0819111			0.317	0.06791	0.26645	1.07079			0.317
	0.318	-0.089902	-0.0759024	-0.1599	-0.032631	-0.129355	-0.0377217			0.318	0.0488212	0.518444	0.823889	0.844252	-0.390257	-1.74822			0.318	0.00554971	0.122637	0.0144585	0.00809509	-0.215898	0.0437304			0.318	0.00554971	0.122637	3.44436	5.41194	0.813708	0.0424577			0.318	0.179908	0.0984561	0.0997288			0.318	0.087	0.23972	1.03388			0.318
	0.319	-0.0924474	-0.0835386	-0.153536	-0.0517213	-0.125537	-0.036449			0.319	0.0513665	0.667348	1.74659	0.55917	-0.374984	-2.91782			0.319	0.00554971	0.134091	0.0119132	0.0386396	-0.236261	0.0195493			0.319	0.00554971	0.134091	2.07367	4.17106	0.518444	9.11037			0.319	0.170999	0.0933653	0.106092			0.319	0.087	0.17736	1.02497			0.319
	0.32	-0.0962655	-0.0708117	-0.167536	-0.0377217	-0.135719	-0.0237222			0.32	0.0602754	0.752619	1.04025	0.0730023	-0.268079	3.36672			0.32	-0.000813741	0.120092	0.0271854	0.0233674	-0.195535	0.0233674			0.32	-0.000813741	0.120092	1.25533	3.41254	0.321177	9.11292			0.32	0.191362	0.0870019	0.0997288			0.32	0.06664	0.17609	1.00461			0.32
	0.321	-0.0924474	-0.069539	-0.143355	-0.0148133	-0.122992	-0.0300856			0.321	0.0602754	0.713165	0.503171	-0.0288129	-0.24517	2.15512			0.321	-0.00972257	0.125183	0.0335489	0.0310035	-0.182808	0.0335489			0.321	-0.00972257	0.125183	0.837889	2.43384	0.229543	9.11164			0.321	0.192635	0.0933653	0.0882745			0.321	0.08573	0.19264	0.96389			0.321
	0.322	-0.0886293	-0.0784478	-0.153536	-0.0288129	-0.128083	-0.0109953			0.322	0.0653661	0.626622	0.130273	-0.0300856	-0.200626	-0.952786			0.322	-0.00844988	0.139182	0.0399123	0.0450031	-0.164991	0.0310035			0.322	-0.00844988	0.139182	0.629168	1.62696	0.196453	9.1091			0.322	0.186272	0.0870019	0.094638			0.322	0.08446	0.20282	0.9117			0.322
	0.323	-0.0886293	-0.0835386	-0.143355	-0.0109953	-0.125537	-0.0122679			0.323	0.0590027	0.537534	0.0870019	0.00936778	-0.191717	-1.8513			0.323	0.00173164	0.139182	0.0437304	0.0348216	-0.144628	0.0437304			0.323	0.00173164	0.139182	0.514626	1.13443	0.155727	8.3773			0.323	0.181181	0.0870019	0.0870019			0.323	0.07937	0.21809	0.86716			0.323
	0.324	-0.0937201	-0.0822659	-0.143355	-0.0211768	-0.136991	-0.0122679			0.324	0.0628207	0.458627	0.05773	-0.00844988	-0.185354	-1.52295			0.324	0.00427702	0.145546	0.0513665	0.0564573	-0.130628	0.0271854			0.324	0.00427702	0.145546	0.470081	0.831525	0.136637	5.4463			0.324	0.192635	0.0844565	0.0971834			0.324	0.08955	0.26263	0.84171			0.324
	0.325	-0.089902	-0.0555394	-0.150991	-0.00844988	-0.129355	0.000458949			0.325	0.178636	0.422992	0.074275	0.0106405	-0.1599	-0.973149			0.325	0.000458949	0.158273	0.0513665	0.0539119	-0.115356	0.0386396			0.325	0.000458949	0.158273	0.408992	0.607532	0.113728	2.82074			0.325	0.184999	0.0870019	0.0844565			0.325	0.09591	0.29827	0.82643			0.325
	0.326	-0.101356	-0.0784478	-0.130628	-0.000813741	-0.119174	-0.00463181			0.326	0.67753	0.398811	0.0831838	-0.0148133	-0.1599	-0.854788			0.326	0.00936778	0.148091	0.0513665	0.0602754	-0.101356	0.0500939			0.326	0.00936778	0.148091	0.321177	0.439537	0.094638	1.60532			0.326	0.177363	0.0755476	0.102274			0.326	0.08064	0.33136	0.85825			0.326
	0.327	-0.102629	-0.0555394	-0.153536	-0.00463181	-0.121719	-0.00844988			0.327	0.686439	0.365721	0.0997288	0.0119132	-0.154809	-0.639704			0.327	0.0182766	0.125183	0.0590027	0.0450031	-0.073357	0.0322762			0.327	0.0182766	0.125183	0.239725	0.313541	0.101001	1.09115			0.327	0.170999	0.0984561	0.0933653			0.327	0.09464	0.3619	0.88116			0.327
	0.328	-0.0949928	-0.0657209	-0.131901	-0.00463181	-0.114083	0.00554971			0.328	0.59735	0.32754	0.0602754	0.0182766	-0.133174	-0.506072			0.328	-0.00335912	0.125183	0.0640934	0.0386396	-0.0657209	0.0462758			0.328	-0.00335912	0.125183	0.211725	0.22318	0.120092	0.750073			0.328	0.19009	0.074275	0.0933653			0.328	0.09209	0.38481	0.89643			0.328
	0.329	-0.089902	-0.0517213	-0.131901	0.0131859	-0.101356	0.0220947			0.329	0.489172	0.29445	0.0475485	0.0462758	-0.120447	-0.436074			0.329	0.00809509	0.120092	0.0640934	0.0526392	-0.0580848	0.0475485			0.329	0.00809509	0.120092	0.200271	0.243543	0.150636	0.536261			0.329	0.177363	0.0933653	0.0870019			0.329	0.09591	0.40517	0.92189			0.329
	0.33	-0.103902	-0.0415398	-0.150991	0.0119132	-0.0911747	0.00554971			0.33	0.397538	0.249906	0.0450031	0.0730023	-0.114083	-0.381348			0.33	0.0195493	0.0997288	0.0793657	0.0730023	-0.0453579	0.0704569			0.33	0.0195493	0.0997288	0.221907	0.24227	0.165909	0.42681			0.33	0.170999	0.0984561	0.111183			0.33	0.09846	0.40136	0.96516			0.33
	0.331	-0.103902	-0.0402671	-0.119174	0.0170039	-0.0988109	0.0195493			0.331	0.319904	0.214271	0.0488212	0.0602754	-0.0962655	-0.423347			0.331	0.0271854	0.0908199	0.0691842	0.0882745	-0.0148133	0.0793657			0.331	0.0271854	0.0908199	0.257542	0.268997	0.197726	0.340267			0.331	0.178636	0.0857292	0.107365			0.331	0.09082	0.38608	0.99061			0.331
	0.332	-0.103902	-0.036449	-0.121719	0.0233674	-0.0924474	0.0271854			0.332	0.257542	0.200271	0.0602754	0.05773	-0.089902	-0.489527			0.332	0.0170039	0.0628207	0.0819111	0.107365	-0.00335912	0.0806384			0.332	0.0170039	0.0628207	0.279178	0.299541	0.188817	0.298268			0.332	0.187544	0.0691842	0.0997288			0.332	0.09846	0.3759	1.02243			0.332
	0.333	-0.122992	-0.0275402	-0.119174	0.0539119	-0.0873566	0.0284581			0.333	0.219362	0.235906	0.0666388	0.074275	-0.0682663	-0.526435			0.333	-0.000813741	0.041185	0.0895472	0.125183	0.00809509	0.0857292			0.333	-0.000813741	0.041185	0.289359	0.276633	0.214271	0.281723			0.333	0.19009	0.0920926	0.0997288			0.333	0.12009	0.29318	1.05425			0.333
	0.334	-0.114083	-0.0351764	-0.110265	0.0526392	-0.0835386	0.0360943			0.334	0.188817	0.249906	0.0500939	0.0360943	-0.0924474	-0.438619			0.334	0.0131859	0.0475485	0.0971834	0.141728	0.0246401	0.103547			0.334	0.0131859	0.0475485	0.258815	0.291905	0.230816	0.200271			0.334	0.186272	0.0920926	0.103547			0.334	0.09718	0.25372	1.04916			0.334
	0.335	-0.120447	-0.0237222	-0.108992	0.0564573	-0.0746297	0.0628207			0.335	0.145546	0.267724	0.0500939	0.0475485	-0.0937201	-0.386439			0.335	0.00554971	0.0437304	0.112456	0.134091	0.0475485	0.094638			0.335	0.00554971	0.0437304	0.260088	0.268997	0.25627	0.20918			0.335	0.153182	0.0895472	0.0844565			0.335	0.10991	0.24736	1.0377			0.335
	0.336	-0.130628	-0.0339037	-0.0937201	0.0640934	-0.0644482	0.0831838			0.336	0.139182	0.24227	0.0488212	0.0640934	-0.114083	-0.326622			0.336	0.00173164	0.0131859	0.113728	0.170999	0.0691842	0.108638			0.336	0.00173164	0.0131859	0.260088	0.243543	0.285541	0.220634			0.336	0.163363	0.0730023	0.0997288			0.336	0.115	0.18754	1.03134			0.336
	0.337	-0.139537	-0.0377217	-0.0797205	0.094638	-0.0644482	0.0997288			0.337	0.101001	0.178636	0.0462758	0.0819111	-0.1459	-0.355894			0.337	-0.0122679	0.020822	0.121365	0.192635	0.0920926	0.108638			0.337	-0.0122679	0.020822	0.291905	0.257542	0.281723	0.266451			0.337	0.160818	0.0793657	0.0882745			0.337	0.11373	0.15955	1.01607			0.337
	0.338	-0.1459	-0.0237222	-0.0644482	0.101001	-0.049176	0.113728			0.338	0.0844565	0.106092	0.0539119	0.094638	-0.167536	-0.329168			0.338	0.0119132	0.0119132	0.137909	0.197726	0.106092	0.0844565			0.338	0.0119132	0.0119132	0.266451	0.295723	0.288087	0.284269			0.338	0.157	0.0730023	0.0844565			0.338	0.12009	0.14045	0.97661			0.338
	0.339	-0.144628	-0.00463181	-0.0402671	0.118819	-0.036449	0.122637			0.339	0.0539119	0.0984561	0.0730023	0.104819	-0.156082	-0.31135			0.339	0.0119132	-0.0059045	0.140455	0.193908	0.137909	0.0895472			0.339	0.0119132	-0.0059045	0.252451	0.352994	0.280451	0.30845			0.339	0.131546	0.05773	0.0691842			0.339	0.13027	0.12773	0.9537			0.339
	0.34	-0.144628	0.0157312	-0.0262675	0.129001	-0.0237222	0.127728			0.34	0.0335489	0.108638	0.0628207	0.094638	-0.187899	-0.293532			0.34	0.0259127	-0.00463181	0.173545	0.200271	0.145546	0.0857292			0.34	0.0259127	-0.00463181	0.200271	0.386084	0.234634	0.305905			0.34	0.120092	0.0513665	0.0220947			0.34	0.11882	0.14936	0.94734			0.34
	0.341	-0.167536	0.0259127	-0.0109953	0.145546	-0.00208643	0.141728			0.341	0.020822	0.144273	0.0730023	0.111183	-0.254079	-0.335531			0.341	0.0284581	-0.0148133	0.174817	0.196453	0.154454	0.0717296			0.341	0.0284581	-0.0148133	0.144273	0.430628	0.221907	0.332631			0.341	0.0717296	0.00936778	-0.0249948			0.341	0.12136	0.12518	0.9257			0.341
	0.342	-0.171354	0.0233674	0.0335489	0.154454	0.00936778	0.160818			0.342	-0.00208643	0.154454	0.0526392	0.101001	-0.301169	-0.322804			0.342	0.0271854	-0.0275402	0.172272	0.201544	0.168454	0.0793657			0.342	0.0271854	-0.0275402	0.0933653	0.430628	0.169727	0.36063			0.342	0.0246401	-0.0173587	-0.0580848			0.342	0.13409	0.185	0.92189			0.342
	0.343	-0.196808	0.0259127	0.0450031	0.173545	0.0220947	0.163363			0.343	-0.0211768	0.158273	0.0335489	0.137909	-0.36353	-0.29735			0.343	0.0195493	-0.032631	0.155727	0.178636	0.178636	0.0793657			0.343	0.0195493	-0.032631	0.00936778	0.443355	0.125183	0.378448			0.343	-0.0631755	-0.105174	-0.139537			0.343	0.13918	0.20282	0.91807			0.343
	0.344	-0.206989	0.0500939	0.0628207	0.184999	0.0488212	0.19009			0.344	-0.0300856	0.106092	0.000458949	0.165909	-0.41062	-0.320259			0.344	0.0157312	-0.0555394	0.167181	0.19009	0.160818	0.0628207			0.344	0.0157312	-0.0555394	-0.0211768	0.477718	0.0908199	0.435719			0.344	-0.130628	-0.157355	-0.218444			0.344	0.12518	0.18882	0.94225			0.344
	0.345	-0.222262	0.0551846	0.078093	0.191362	0.0526392	0.174817			0.345	-0.0428125	-0.103902	-0.00717719	0.167181	-0.472982	-0.326622			0.345	0.0335489	-0.0479033	0.160818	0.177363	0.216816	0.0653661			0.345	0.0335489	-0.0479033	-0.106447	0.527353	0.0195493	0.456082			0.345	-0.248988	-0.224807	-0.290987			0.345	0.15064	0.21682	0.96007			0.345
	0.346	-0.232443	0.0640934	0.0971834	0.178636	0.0730023	0.183726			0.346	-0.0517213	-0.461527	-0.0402671	0.169727	-0.526435	-0.304987			0.346	0.0131859	-0.0631755	0.163363	0.168454	0.204089	0.0106405			0.346	0.0131859	-0.0631755	-0.156082	0.547716	0.00300433	0.489172			0.346	-0.350803	-0.338077	-0.362258			0.346	0.13664	0.21173	1.01098			0.346
	0.347	-0.261715	0.0755476	0.130273	0.188817	0.0704569	0.191362			0.347	-0.0937201	-0.567161	-0.0911747	0.169727	-0.567161	-0.288442			0.347	0.0131859	-0.0580848	0.170999	0.178636	0.224452	-0.243897			0.347	0.0131859	-0.0580848	-0.224807	0.579533	-0.0949928	0.490445			0.347	-0.455164	-0.418256	-0.438619			0.347	0.13536	0.23463	1.06316			0.347
	0.348	-0.275715	0.0844565	0.134091	0.191362	0.0819111	0.187544			0.348	-0.114083	-0.251534	0.0246401	0.158273	-0.665158	-0.343167			0.348	-0.00208643	-0.0593575	0.146818	0.167181	0.24227	-0.372439			0.348	-0.00208643	-0.0593575	-0.264261	0.607532	-0.131901	0.503171			0.348	-0.573524	-0.500981	-0.500981			0.348	0.14173	0.22954	1.07715			0.348
	0.349	-0.306259	0.0793657	0.139182	0.200271	0.0793657	0.186272			0.349	-0.154809	0.0271854	0.321177	0.158273	-0.708429	-0.399166			0.349	-0.0186314	-0.0542667	0.150636	0.168454	0.215543	-0.274442			0.349	-0.0186314	-0.0542667	-0.322804	0.624077	-0.196808	0.518444			0.349	-0.646067	-0.587524	-0.573524			0.349	0.13536	0.22827	1.1077			0.349
	0.35	-0.336804	0.101001	0.153182	0.202817	0.0984561	0.195181			0.35	-0.171354	0.19009	0.64444	0.174817	-0.737701	-0.479345			0.35	-0.0275402	-0.0644482	0.130273	0.154454	0.220634	-0.302441			0.35	-0.0275402	-0.0644482	-0.355894	0.63044	-0.24517	0.557897			0.35	-0.726247	-0.676612	-0.624432			0.35	0.12264	0.19264	1.11152			0.35
	0.351	-0.368621	0.0882745	0.16209	0.196453	0.108638	0.196453			0.351	-0.243897	0.243543	0.890069	0.174817	-0.724974	-0.568433			0.351	-0.0453579	-0.103902	0.132819	0.153182	0.216816	-0.470436			0.351	-0.0453579	-0.103902	-0.419529	0.654621	-0.287169	0.568079			0.351	-0.758064	-0.737701	-0.681703			0.351	0.12264	0.13791	1.13188			0.351
	0.352	-0.397893	0.0908199	0.168454	0.220634	0.104819	0.179908			0.352	-0.312623	0.272815	1.11152	0.173545	-0.811517	-0.775882			0.352	-0.032631	-0.0848113	0.116274	0.151909	0.207907	0.96134			0.352	-0.032631	-0.0848113	-0.4488	0.674984	-0.348258	0.575715			0.352	-0.808972	-0.817881	-0.709702			0.352	0.09846	0.10864	1.14079			0.352
	0.353	-0.425892	0.0895472	0.170999	0.204089	0.107365	0.191362			0.353	-0.349531	0.22318	1.17388	0.206635	-0.824244	-0.886606			0.353	-0.0542667	-0.0988109	0.121365	0.130273	0.198998	1.45769			0.353	-0.0542667	-0.0988109	-0.466618	0.690257	-0.395348	0.551534			0.353	-0.821699	-0.877697	-0.770791			0.353	0.10482	0.10482	1.09497			0.353
	0.354	-0.433528	0.0806384	0.186272	0.20918	0.107365	0.197726			0.354	-0.383893	0.240997	1.14715	0.230816	-1.03296	-0.796245			0.354	-0.0542667	-0.0962655	0.10991	0.130273	0.230816	-5.63247			0.354	-0.0542667	-0.0962655	-0.516253	0.716983	-0.438619	0.532443			0.354	-0.844607	-0.945149	-0.819153			0.354	0.101	0.14555	1.0657			0.354
	0.355	-0.436074	0.0895472	0.184999	0.206635	0.094638	0.195181			0.355	-0.439892	0.221907	1.07079	0.221907	-1.20987	-0.761882			0.355	-0.0746297	-0.103902	0.0997288	0.118819	0.235906	-4.57486			0.355	-0.0746297	-0.103902	-0.534071	0.718256	-0.507344	0.537534			0.355	-0.873879	-0.994784	-0.844607			0.355	0.09846	0.13282	0.99188			0.355
	0.356	-0.437346	0.0895472	0.191362	0.205362	0.104819	0.205362			0.356	-0.518799	0.207907	0.988066	0.398811	-1.29768	-0.83188			0.356	-0.0631755	-0.10772	0.0933653	0.108638	0.235906	-4.07215			0.356	-0.0631755	-0.10772	-0.556979	0.708074	-0.540434	0.54517			0.356	-0.938786	-1.0126	-0.885333			0.356	0.08955	0.15191	0.93207			0.356
	0.357	-0.460255	0.0730023	0.188817	0.226998	0.0920926	0.205362			0.357	-0.537889	0.25627	0.938431	0.660985	-1.30532	-0.717338			0.357	-0.0682663	-0.100084	0.078093	0.112456	0.216816	-3.05527			0.357	-0.0682663	-0.100084	-0.577342	0.718256	-0.578615	0.582078			0.357	-1.03042	-1.0546	-0.880242			0.357	0.10991	0.18882	0.94098			0.357
	0.358	-0.415711	0.061548	0.206635	0.221907	0.094638	0.206635			0.358	-0.663885	0.221907	0.864615	0.970248	-1.4975	-0.722429			0.358	-0.0555394	-0.0975382	0.0793657	0.117546	0.22318	-2.13893			0.358	-0.0555394	-0.0975382	-0.612977	0.699166	-0.605341	0.607532			0.358	-1.21241	-1.10424	-0.918423			0.358	0.09718	0.23082	0.90025			0.358
	0.359	-0.39662	0.0526392	0.206635	0.232089	0.107365	0.188817			0.359	-0.749155	0.200271	0.821344	1.19042	-1.58149	-0.736428			0.359	-0.0759024	-0.0975382	0.0844565	0.0984561	0.224452	-1.27987			0.359	-0.0759024	-0.0975382	-0.619341	0.722074	-0.637159	0.606259			0.359	-1.42241	-1.12842	-0.93115			0.359	0.11373	0.269	0.87989			0.359
	0.36	-0.404256	0.0590027	0.196453	0.233361	0.0908199	0.19009			0.36	-1.01642	0.215543	0.739892	1.18788	-1.40459	-0.671521			0.36	-0.0708117	-0.11281	0.0793657	0.120092	0.191362	-0.820426			0.36	-0.0708117	-0.11281	-0.658794	0.711893	-0.604069	0.610077			0.36	-1.67186	-1.13478	-0.941331			0.36	0.13027	0.3479	0.87861			0.36
	0.361	-0.387711	0.0424577	0.205362	0.230816	0.104819	0.19009			0.361	-1.27478	0.266451	0.640622	1.10261	-1.41859	-0.567161			0.361	-0.0466306	-0.110265	0.0590027	0.0984561	0.17609	-0.551888			0.361	-0.0466306	-0.110265	-0.652431	0.69153	-0.590069	0.616441			0.361	-1.88058	-1.17551	-0.938786			0.361	0.12009	0.37463	0.87989			0.361
	0.362	-0.372439	0.0271854	0.206635	0.220634	0.0831838	0.192635			0.362	-1.48604	0.331358	0.386084	1.00079	-1.39823	-0.546798			0.362	-0.0428125	-0.100084	0.0564573	0.104819	0.181181	-0.241352			0.362	-0.0428125	-0.100084	-0.662612	0.690257	-0.579888	0.639349			0.362	-2.03457	-1.18314	-0.960422			0.362	0.10736	0.38736	0.88371			0.362
	0.363	-0.366076	0.0259127	0.212998	0.224452	0.0870019	0.191362			0.363	-1.36005	0.403902	0.131546	0.954976	-1.16532	-0.485708			0.363	-0.0275402	-0.0911747	0.0602754	0.094638	0.157	-0.195535			0.363	-0.0275402	-0.0911747	-0.674067	0.701711	-0.54807	0.641895			0.363	-2.09948	-1.18569	-0.942604			0.363	0.11373	0.38099	0.90916			0.363
	0.364	-0.36353	0.00554971	0.205362	0.226998	0.0959107	0.200271			0.364	-1.23914	0.456082	-0.0186314	0.884978	-0.955331	-0.392802			0.364	-0.0173587	-0.0809932	0.0704569	0.0920926	0.198998	-0.218444			0.364	-0.0173587	-0.0809932	-0.679157	0.694075	-0.539161	0.652076			0.364	-2.12493	-1.1946	-0.951513			0.364	0.12518	0.36827	0.93207			0.364
	0.365	-0.338077	0.0182766	0.211725	0.22318	0.0844565	0.200271			0.365	-1.00242	0.51208	-0.0542667	0.804799	-0.755519	-0.223534			0.365	-0.0135406	-0.0949928	0.0488212	0.0870019	0.205362	-0.218444			0.365	-0.0135406	-0.0949928	-0.688066	0.683893	-0.530253	0.631713			0.365	-2.09566	-1.17296	-0.968058			0.365	0.11755	0.37463	0.96261			0.365
	0.366	-0.348258	-0.0059045	0.191362	0.22318	0.0691842	0.163363			0.366	-0.770791	0.551534	-0.0848113	0.678803	-0.718611	-0.24517			0.366	-0.0135406	-0.0911747	0.0653661	0.0959107	0.195181	-0.237534			0.366	-0.0135406	-0.0911747	-0.681703	0.666076	-0.544252	0.646985			0.366	-2.04857	-1.1946	-0.955331			0.366	0.115	0.34281	0.96007			0.366
	0.367	-0.345713	-0.0237222	0.20918	0.232089	0.0793657	0.137909			0.367	-0.605341	0.588442	-0.0988109	0.476445	-0.702066	-0.348258			0.367	0.000458949	-0.0873566	0.0551846	0.0691842	0.201544	-0.209535			0.367	0.000458949	-0.0873566	-0.705884	0.66353	-0.554434	0.643167			0.367	-1.96839	-1.17296	-0.961695			0.367	0.12646	0.35045	0.92061			0.367
	0.368	-0.354621	-0.00717719	0.196453	0.210453	0.0653661	0.121365			0.368	-0.475527	0.62535	-0.101356	0.466263	-0.607887	-0.316441			0.368	-0.0109953	-0.0746297	0.0539119	0.0857292	0.172272	-0.195535			0.368	-0.0109953	-0.0746297	-0.675339	0.645713	-0.539161	0.643167			0.368	-1.88312	-1.17551	-0.95024			0.368	0.11755	0.30336	0.9257			0.368
	0.369	-0.339349	-0.036449	0.182454	0.215543	0.0691842	0.0768203			0.369	-0.37753	0.666076	-0.0911747	0.356812	-0.48189	-0.348258			0.369	0.0182766	-0.0784478	0.0450031	0.0590027	0.178636	-0.162445			0.369	0.0182766	-0.0784478	-0.675339	0.660985	-0.558252	0.639349			0.369	-1.78894	-1.17423	-0.93115			0.369	0.14045	0.23718	0.91807			0.369
	0.37	-0.332986	-0.032631	0.191362	0.16209	0.0793657	0.000458949			0.37	-0.317713	0.685166	-0.102629	0.284269	-0.42971	-0.310077			0.37	-0.00208643	-0.0784478	0.0564573	0.0844565	0.168454	-0.144628			0.37	-0.00208643	-0.0784478	-0.662612	0.66353	-0.539161	0.654621			0.37	-1.69349	-1.15132	-0.928605			0.37	0.12646	0.20409	0.89771			0.37
	0.371	-0.326622	-0.0339037	0.188817	0.078093	0.0526392	-0.0479033			0.371	-0.289714	0.697893	-0.0822659	0.22827	-0.404256	-0.273169			0.371	0.0157312	-0.0708117	0.041185	0.0844565	0.160818	-0.135719			0.371	0.0157312	-0.0708117	-0.677885	0.664803	-0.563343	0.671166			0.371	-1.5904	-1.13478	-0.91715			0.371	0.12009	0.19773	0.86843			0.371
	0.372	-0.326622	-0.0351764	0.182454	0.0106405	0.0526392	-0.0148133			0.372	-0.248988	0.711893	-0.0428125	0.204089	-0.387711	-0.284623			0.372	0.0106405	-0.0644482	0.0437304	0.0590027	0.164636	-0.138264			0.372	0.0106405	-0.0644482	-0.665158	0.655894	-0.567161	0.680075			0.372	-1.51531	-1.1106	-0.89806			0.372	0.13664	0.20409	0.80862			0.372
	0.373	-0.329168	-0.0275402	0.204089	-0.0415398	0.041185	0.0195493			0.373	-0.220989	0.736074	-0.0237222	0.221907	-0.362258	-0.268079			0.373	-0.0059045	-0.0631755	0.0348216	0.0691842	0.16209	-0.121719			0.373	-0.0059045	-0.0631755	-0.625704	0.641895	-0.568433	0.678803			0.373	-1.40077	-1.08896	-0.870061			0.373	0.11882	0.21682	0.78953			0.373
	0.374	-0.322804	-0.0262675	0.212998	-0.0224495	0.0475485	0.0297308			0.374	-0.213353	0.757709	-0.000813741	0.232089	-0.359712	-0.256624			0.374	0.000458949	-0.0466306	0.0462758	0.104819	0.121365	-0.114083			0.374	0.000458949	-0.0466306	-0.624432	0.63044	-0.572251	0.673712			0.374	-1.31296	-1.07751	-0.870061			0.374	0.11882	0.22445	0.74244			0.374
	0.375	-0.324077	-0.0377217	0.22827	0.00936778	0.00936778	0.0284581			0.375	-0.199353	0.788254	-0.0453579	0.195181	-0.321532	-0.203171			0.375	-0.0059045	-0.0415398	0.0182766	0.0844565	0.102274	-0.0619029			0.375	-0.0059045	-0.0415398	-0.606614	0.631713	-0.554434	0.699166			0.375	-1.25441	-1.04187	-0.833153			0.375	0.11882	0.26263	0.75262			0.375
	0.376	-0.303714	-0.0440852	0.211725	0.0462758	-0.0224495	0.0297308			0.376	-0.195535	0.80989	-0.0720844	0.202817	-0.284623	-0.170081			0.376	-0.0059045	-0.0504486	0.0513665	0.103547	0.108638	-0.0440852			0.376	-0.0059045	-0.0504486	-0.574797	0.624077	-0.559524	0.683893			0.376	-1.14114	-1.01388	-0.808972			0.376	0.09591	0.297	0.75644			0.376
	0.377	-0.316441	-0.0377217	0.158273	0.0793657	-0.052994	0.0564573			0.377	-0.189172	0.837889	-0.0682663	0.210453	-0.261715	-0.154809			0.377	0.00809509	-0.0186314	0.0399123	0.113728	0.0819111	-0.0466306			0.377	0.00809509	-0.0186314	-0.553161	0.627895	-0.541707	0.687711			0.377	-1.06605	-0.994784	-0.766973			0.377	0.10864	0.27154	0.78316			0.377
	0.378	-0.308805	-0.0122679	0.107365	0.102274	-0.0784478	0.0640934			0.378	-0.182808	0.864615	-0.0848113	0.253724	-0.243897	-0.1459			0.378	0.00554971	-0.0517213	0.0348216	0.0653661	0.10991	-0.0377217			0.378	0.00554971	-0.0517213	-0.541707	0.618986	-0.517526	0.686439			0.378	-1.01006	-0.971876	-0.76061			0.378	0.10355	0.30209	0.77171			0.378
	0.379	-0.308805	-0.0237222	0.0513665	0.10991	-0.102629	0.0959107			0.379	-0.181536	0.887524	-0.116628	0.267724	-0.246443	-0.138264			0.379	-0.00717719	-0.0453579	0.0488212	0.0895472	0.101001	-0.0224495			0.379	-0.00717719	-0.0453579	-0.532798	0.618986	-0.511162	0.730983			0.379	-0.918423	-0.932423	-0.716065			0.379	0.10609	0.2919	0.78189			0.379
	0.38	-0.289714	-0.0199041	0.0462758	0.117546	-0.0911747	0.113728			0.38	-0.171354	0.916795	-0.116628	0.321177	-0.246443	-0.0606302			0.38	-0.0262675	-0.0313583	0.0488212	0.0971834	0.121365	-0.00335912			0.38	-0.0262675	-0.0313583	-0.522617	0.63044	-0.500981	0.724619			0.38	-0.84588	-0.889151	-0.69443			0.38	0.11118	0.27281	0.82643			0.38
	0.381	-0.296078	-0.0148133	0.0157312	0.125183	-0.0784478	0.134091			0.381	-0.176445	0.94734	-0.131901	0.332631	-0.232443	-0.0504486			0.381	-0.0377217	-0.0237222	0.0551846	0.0920926	0.0895472	0.00300433			0.381	-0.0377217	-0.0237222	-0.517526	0.601168	-0.4628	0.719529			0.381	-0.7797	-0.848425	-0.656249			0.381	0.09973	0.22191	0.84298			0.381
	0.382	-0.29226	-0.00717719	-0.0199041	0.163363	-0.0504486	0.158273			0.382	-0.1739	0.963885	-0.167536	0.363175	-0.205717	-0.0275402			0.382	-0.049176	-0.0199041	0.0602754	0.0628207	0.0730023	0.00554971			0.382	-0.049176	-0.0199041	-0.502254	0.602441	-0.430983	0.739892			0.382	-0.705884	-0.819153	-0.607887			0.382	0.09846	0.15955	0.85443			0.382
	0.383	-0.298623	-0.00844988	-0.0288129	0.158273	-0.0224495	0.158273			0.383	-0.163718	0.982975	-0.190444	0.359357	-0.201899	-0.0122679			0.383	-0.0619029	-0.0173587	0.0679115	0.0691842	0.074275	0.0233674			0.383	-0.0619029	-0.0173587	-0.472982	0.608805	-0.441164	0.775527			0.383	-0.651158	-0.768246	-0.565888			0.383	0.08827	0.13664	0.89389			0.383
	0.384	-0.284623	-0.016086	-0.0351764	0.174817	-0.0402671	0.160818			0.384	-0.154809	0.996975	-0.191717	0.349176	-0.198081	-0.0339037			0.384	-0.0708117	-0.0186314	0.0551846	0.0640934	0.0730023	0.0475485			0.384	-0.0708117	-0.0186314	-0.465346	0.607532	-0.416983	0.765346			0.384	-0.572251	-0.742792	-0.507344			0.384	0.10482	0.05391	0.90407			0.384
	0.385	-0.274442	-0.0109953	-0.0377217	0.17609	-0.0580848	0.173545			0.385	-0.153536	1.01861	-0.199353	0.323722	-0.171354	-0.0186314			0.385	-0.073357	-0.0109953	0.061548	0.0628207	0.0768203	0.0182766			0.385	-0.073357	-0.0109953	-0.475527	0.599896	-0.430983	0.78189			0.385	-0.521344	-0.700793	-0.461527			0.385	0.11882	0.017	0.89898			0.385
	0.386	-0.283351	-0.00972257	-0.0313583	0.186272	-0.0428125	0.186272			0.386	-0.153536	1.0377	-0.21208	0.313541	-0.153536	0.00809509			0.386	-0.0542667	-0.0199041	0.0640934	0.0704569	0.0691842	0.0335489			0.386	-0.0542667	-0.0199041	-0.453891	0.61135	-0.422074	0.772982			0.386	-0.486981	-0.648613	-0.413165			0.386	0.11882	0.02591	0.87352			0.386
	0.387	-0.276987	0.0119132	-0.0389944	0.181181	-0.036449	0.186272			0.387	-0.1459	1.06061	-0.1739	0.313541	-0.148446	-0.016086			0.387	-0.0759024	-0.00844988	0.0755476	0.0793657	0.078093	0.0259127			0.387	-0.0759024	-0.00844988	-0.452619	0.580805	-0.413165	0.779345			0.387	-0.420801	-0.587524	-0.360985			0.387	0.11118	-0.00718	0.86462			0.387
	0.388	-0.251534	-0.00208643	-0.0275402	0.206635	-0.0275402	0.195181			0.388	-0.139537	1.06697	-0.171354	0.300814	-0.168809	-0.0339037			0.388	-0.0886293	0.00809509	0.0870019	0.0768203	0.0793657	0.0284581			0.388	-0.0886293	0.00809509	-0.455164	0.57826	-0.418256	0.790799			0.388	-0.360985	-0.558252	-0.29226			0.388	0.10609	-0.02627	0.84043			0.388
	0.389	-0.252806	-0.000813741	-0.0402671	0.195181	-0.00844988	0.197726			0.389	-0.131901	1.07206	-0.1599	0.29445	-0.149718	-0.0288129			0.389	-0.0542667	-0.000813741	0.0564573	0.0819111	0.0882745	0.0182766			0.389	-0.0542667	-0.000813741	-0.428438	0.568079	-0.419529	0.778072			0.389	-0.315168	-0.512435	-0.237534			0.389	0.10482	-0.01481	0.77044			0.389
	0.39	-0.238807	0.0182766	-0.052994	0.187544	-0.0237222	0.204089			0.39	-0.133174	1.09243	-0.150991	0.296996	-0.134446	-0.0186314			0.39	-0.0644482	-0.0186314	0.074275	0.0730023	0.0870019	0.0335489			0.39	-0.0644482	-0.0186314	-0.434801	0.556624	-0.430983	0.74371			0.39	-0.274442	-0.418256	-0.198081			0.39	0.11627	0.01446	0.74244			0.39
	0.391	-0.237534	0.00554971	-0.0759024	0.219362	0.00173164	0.216816			0.391	-0.136991	1.10897	-0.14081	0.286814	-0.115356	0.0157312			0.391	-0.069539	-0.0211768	0.0640934	0.0844565	0.0895472	0.0297308			0.391	-0.069539	-0.0211768	-0.399166	0.522262	-0.415711	0.738619			0.391	-0.227353	-0.395348	-0.135719			0.391	0.12136	0.06409	0.72716			0.391
	0.392	-0.241352	0.0271854	-0.069539	0.235906	0.000458949	0.211725			0.392	-0.131901	1.11915	-0.131901	0.298268	-0.131901	0.0590027			0.392	-0.0797205	-0.000813741	0.0526392	0.0984561	0.074275	0.0284581			0.392	-0.0797205	-0.000813741	-0.4488	0.523534	-0.422074	0.720801			0.392	-0.189172	-0.339349	-0.069539			0.392	0.12009	0.14682	0.72462			0.392
	0.393	-0.240079	0.0157312	-0.086084	0.224452	0.0119132	0.226998			0.393	-0.124265	1.11788	-0.119174	0.289359	-0.130628	0.0335489			0.393	-0.0631755	-0.0109953	0.0424577	0.0857292	0.0793657	0.0399123			0.393	-0.0631755	-0.0109953	-0.511162	0.498081	-0.433528	0.713165			0.393	-0.148446	-0.296078	-0.0109953			0.393	0.10355	0.19773	0.71444			0.393
	0.394	-0.219716	0.0220947	-0.0988109	0.212998	0.0259127	0.229543			0.394	-0.117901	1.11661	-0.108992	0.295723	-0.153536	0.0526392			0.394	-0.0517213	-0.00335912	0.0640934	0.0819111	0.0717296	0.0551846			0.394	-0.0517213	-0.00335912	-0.58116	0.486626	-0.455164	0.685166			0.394	-0.108992	-0.252806	0.0475485			0.394	0.129	0.23845	0.74371			0.394
	0.395	-0.231171	0.0246401	-0.102629	0.225725	0.0220947	0.232089			0.395	-0.117901	1.12679	-0.0924474	0.309723	-0.157355	0.0386396			0.395	-0.0351764	0.0182766	0.0488212	0.0844565	0.0704569	0.05773			0.395	-0.0351764	0.0182766	-0.597705	0.477718	-0.453891	0.674984			0.395	-0.0580848	-0.205717	0.10991			0.395	0.12773	0.25245	0.78316			0.395
	0.396	-0.209535	0.0360943	-0.089902	0.240997	0.0271854	0.221907			0.396	-0.119174	1.12552	-0.0911747	0.293178	-0.167536	0.0819111			0.396	-0.0351764	-0.00972257	0.0450031	0.0806384	0.0870019	0.061548			0.396	-0.0351764	-0.00972257	-0.52898	0.477718	-0.423347	0.672439			0.396	-0.0339037	-0.144628	0.131546			0.396	0.12518	0.30845	0.79716			0.396
	0.397	-0.206989	0.0399123	-0.0937201	0.224452	0.0310035	0.220634			0.397	-0.11281	1.12552	-0.089902	0.281723	-0.161173	0.0920926			0.397	-0.0580848	-0.00335912	0.05773	0.0857292	0.0984561	0.0564573			0.397	-0.0580848	-0.00335912	-0.444982	0.477718	-0.388984	0.639349			0.397	-0.00717719	-0.0937201	0.181181			0.397	0.11755	0.32499	0.85952			0.397
	0.398	-0.175172	0.0259127	-0.089902	0.22827	0.0259127	0.215543			0.398	-0.0988109	1.13824	-0.0771751	0.316086	-0.156082	0.0844565			0.398	-0.0479033	-0.00972257	0.0564573	0.0691842	0.074275	0.0564573			0.398	-0.0479033	-0.00972257	-0.352076	0.466263	-0.376257	0.640622			0.398	0.0233674	-0.0504486	0.233361			0.398	0.12136	0.33263	0.89643			0.398
	0.399	-0.149718	0.0297308	-0.089902	0.214271	0.037367	0.233361			0.399	-0.102629	1.14333	-0.0975382	0.27536	-0.149718	0.0653661			0.399	-0.0351764	0.00427702	0.0539119	0.0691842	0.0806384	0.05773			0.399	-0.0351764	0.00427702	-0.29226	0.454809	-0.349531	0.582078			0.399	0.0551846	-0.00208643	0.251179			0.399	0.11627	0.33136	0.89389			0.399
	0.4	-0.0886293	0.0220947	-0.106447	0.249906	0.0437304	0.233361			0.4	-0.101356	1.14206	-0.0835386	0.276633	-0.1599	0.0704569			0.4	-0.0300856	-0.0249948	0.0628207	0.0640934	0.0793657	0.05773			0.4	-0.0300856	-0.0249948	-0.268079	0.431901	-0.327895	0.538807			0.4	0.078093	0.0551846	0.293178			0.4	0.13027	0.31354	0.89389			0.4
	0.401	-0.0211768	0.0233674	-0.110265	0.246088	0.0386396	0.247361			0.401	-0.0988109	1.13824	-0.0835386	0.280451	-0.154809	0.0793657			0.401	-0.0300856	0.00173164	0.0730023	0.0628207	0.0870019	0.0717296			0.401	-0.0300856	0.00173164	-0.250261	0.453537	-0.332986	0.490445			0.401	0.121365	0.0895472	0.332631			0.401	0.13918	0.25627	0.9168			0.401
	0.402	0.041185	0.0157312	-0.100084	0.246088	0.0220947	0.237179			0.402	-0.0975382	1.14206	-0.0593575	0.246088	-0.166263	0.0997288			0.402	-0.00972257	-0.00972257	0.0640934	0.0500939	0.074275	0.0551846			0.402	-0.00972257	-0.00972257	-0.209535	0.450991	-0.326622	0.510807			0.402	0.146818	0.145546	0.377175			0.402	0.13155	0.23082	0.92443			0.402
	0.403	0.160818	0.0233674	-0.122992	0.238452	0.0500939	0.244815			0.403	-0.0975382	1.12806	-0.0962655	0.26136	-0.148446	0.0997288			0.403	-0.0148133	-0.0059045	0.0704569	0.041185	0.0691842	0.0857292			0.403	-0.0148133	-0.0059045	-0.224807	0.424265	-0.334258	0.533716			0.403	0.184999	0.17609	0.403902			0.403	0.13282	0.21936	0.88498			0.403
	0.404	0.263906	0.0182766	-0.103902	0.237179	0.0271854	0.234634			0.404	-0.0949928	1.13824	-0.0797205	0.257542	-0.129355	0.120092			0.404	-0.000813741	-0.00463181	0.0755476	0.0488212	0.0819111	0.0870019			0.404	-0.000813741	-0.00463181	-0.224807	0.430628	-0.326622	0.582078			0.404	0.195181	0.216816	0.42681			0.404	0.12136	0.22318	0.84171			0.404
	0.405	0.296996	0.00936778	-0.111538	0.239725	0.0297308	0.225725			0.405	-0.0873566	1.14333	-0.0759024	0.265178	-0.14081	0.145546			0.405	-0.0148133	-0.0186314	0.0450031	0.0500939	0.0768203	0.0793657			0.405	-0.0148133	-0.0186314	-0.21208	0.40772	-0.340622	0.587169			0.405	0.198998	0.258815	0.471354			0.405	0.10227	0.23082	0.79589			0.405
	0.406	0.182454	0.0157312	-0.143355	0.252451	0.0399123	0.225725			0.406	-0.0886293	1.13824	-0.0822659	0.252451	-0.124265	0.163363			0.406	-0.0122679	-0.0186314	0.0488212	0.0360943	0.078093	0.0551846			0.406	-0.0122679	-0.0186314	-0.228625	0.406447	-0.340622	0.570624			0.406	0.226998	0.29445	0.495535			0.406	0.12518	0.21045	0.77553			0.406
	0.407	0.0971834	0.0220947	-0.119174	0.239725	0.0246401	0.220634			0.407	-0.0848113	1.1357	-0.0924474	0.226998	-0.130628	0.191362			0.407	0.0170039	-0.0262675	0.0322762	0.0539119	0.0653661	0.0526392			0.407	0.0170039	-0.0262675	-0.229898	0.389902	-0.340622	0.583351			0.407	0.252451	0.332631	0.54517			0.407	0.12518	0.19518	0.74498			0.407
	0.408	0.0386396	-0.0148133	-0.121719	0.249906	0.0246401	0.225725			0.408	-0.0809932	1.12933	-0.0962655	0.234634	-0.129355	0.165909			0.408	-0.0173587	-0.0351764	0.0500939	0.0335489	0.074275	0.0360943			0.408	-0.0173587	-0.0351764	-0.218444	0.365721	-0.341895	0.596078			0.408	0.262633	0.386084	0.576987			0.408	0.14045	0.22573	0.71953			0.408
	0.409	0.00427702	-0.0237222	-0.144628	0.246088	0.020822	0.210453			0.409	-0.0784478	1.1357	-0.103902	0.225725	-0.136991	0.108638			0.409	0.0068224	-0.032631	0.0271854	0.0131859	0.0475485	0.0271854			0.409	0.0068224	-0.032631	-0.231171	0.349176	-0.362258	0.57826			0.409	0.276633	0.406447	0.580805			0.409	0.16209	0.24863	0.73607			0.409
	0.41	0.00809509	-0.0186314	-0.153536	0.224452	0.0437304	0.221907			0.41	-0.069539	1.13315	-0.0924474	0.225725	-0.134446	0.0882745			0.41	-0.0199041	-0.036449	0.0246401	0.0322762	0.0526392	0.041185			0.41	-0.0199041	-0.036449	-0.255352	0.333904	-0.35844	0.537534			0.41	0.313541	0.424265	0.610077			0.41	0.15445	0.2919	0.70553			0.41
	0.411	-0.0173587	-0.00844988	-0.162445	0.237179	0.0399123	0.198998			0.411	-0.0797205	1.11788	-0.100084	0.221907	-0.129355	0.122637			0.411	-0.0059045	-0.0224495	0.0462758	0.0310035	0.037367	0.0348216			0.411	-0.0059045	-0.0224495	-0.251534	0.324995	-0.36353	0.527353			0.411	0.322449	0.44081	0.639349			0.411	0.14936	0.28809	0.69026			0.411
	0.412	-0.0440852	-0.00717719	-0.166263	0.230816	0.0488212	0.224452			0.412	-0.073357	1.11279	-0.114083	0.238452	-0.130628	0.115001			0.412	-0.0059045	-0.0237222	0.0106405	0.0284581	0.0297308	0.0335489			0.412	-0.0059045	-0.0237222	-0.247716	0.321177	-0.372439	0.510807			0.412	0.336449	0.473899	0.662258			0.412	0.15573	0.30845	0.69535			0.412
	0.413	-0.0504486	-0.0199041	-0.1739	0.219362	0.0131859	0.198998			0.413	-0.0669936	1.12552	-0.110265	0.221907	-0.134446	0.135364			0.413	0.000458949	-0.0262675	0.000458949	0.0144585	0.0590027	0.0437304			0.413	0.000458949	-0.0262675	-0.270624	0.293178	-0.368621	0.486626			0.413	0.336449	0.505717	0.695348			0.413	0.13918	0.269	0.7348			0.413
	0.414	-0.0822659	-0.0224495	-0.185354	0.207907	0.0271854	0.188817			0.414	-0.073357	1.12043	-0.116628	0.266451	-0.134446	0.0933653			0.414	-0.0148133	-0.0249948	-0.00844988	0.0310035	0.0424577	0.0284581			0.414	-0.0148133	-0.0249948	-0.275715	0.274087	-0.357167	0.4599			0.414	0.347903	0.528625	0.708074			0.414	0.13664	0.25372	0.7628			0.414
	0.415	-0.0809932	-0.0275402	-0.176445	0.201544	0.00554971	0.186272			0.415	-0.069539	1.11024	-0.116628	0.239725	-0.136991	0.112456			0.415	-0.0122679	-0.0249948	0.00300433	0.037367	0.0526392	0.0424577			0.415	-0.0122679	-0.0249948	-0.251534	0.276633	-0.357167	0.450991			0.415	0.389902	0.527353	0.718256			0.415	0.13027	0.23336	0.77553			0.415
	0.416	-0.073357	-0.00335912	-0.217171	0.196453	0.0195493	0.183726			0.416	-0.0606302	1.11915	-0.119174	0.225725	-0.149718	0.126455			0.416	-0.0211768	-0.0249948	0.00300433	0.0157312	0.0500939	0.0399123			0.416	-0.0211768	-0.0249948	-0.260442	0.260088	-0.373712	0.419174			0.416	0.369539	0.564261	0.730983			0.416	0.14809	0.21173	0.80353			0.416
	0.417	-0.073357	0.00427702	-0.208262	0.19009	0.0119132	0.181181			0.417	-0.0568121	1.11024	-0.138264	0.212998	-0.125537	0.0984561			0.417	-0.0237222	-0.0313583	-0.00972257	0.0182766	0.0526392	0.0602754			0.417	-0.0237222	-0.0313583	-0.254079	0.257542	-0.376257	0.403902			0.417	0.383539	0.583351	0.752619			0.417	0.11755	0.15064	0.80607			0.417
	0.418	-0.0784478	-0.00844988	-0.21208	0.186272	0.0131859	0.173545			0.418	-0.052994	1.11279	-0.119174	0.211725	-0.0937201	0.106092			0.418	-0.0186314	-0.0351764	-0.00844988	0.0284581	0.0488212	0.0628207			0.418	-0.0186314	-0.0351764	-0.255352	0.240997	-0.386439	0.372084			0.418	0.394993	0.594805	0.771709			0.418	0.13155	0.13664	0.78953			0.418
	0.419	-0.0771751	0.00173164	-0.215898	0.168454	0.0259127	0.165909			0.419	-0.0593575	1.1077	-0.122992	0.191362	-0.108992	0.116274			0.419	-0.0262675	-0.0479033	0.00173164	0.0475485	0.0488212	0.0450031			0.419	-0.0262675	-0.0479033	-0.241352	0.234634	-0.400438	0.36063			0.419	0.398811	0.606259	0.779345			0.419	0.10609	0.115	0.78062			0.419
	0.42	-0.069539	0.0220947	-0.21208	0.188817	0.00936778	0.165909			0.42	-0.052994	1.09752	-0.106447	0.177363	-0.103902	0.118819			0.42	-0.0377217	-0.0402671	-0.00463181	0.0488212	0.037367	0.0475485			0.42	-0.0377217	-0.0402671	-0.228625	0.247361	-0.373712	0.323722			0.42	0.405174	0.621532	0.785709			0.42	0.10991	0.07555	0.78698			0.42
	0.421	-0.0720844	0.037367	-0.222262	0.19009	0.0131859	0.145546			0.421	-0.049176	1.0937	-0.108992	0.186272	-0.117901	0.103547			0.421	-0.0262675	-0.0377217	0.0182766	0.0271854	0.0386396	0.0437304			0.421	-0.0262675	-0.0377217	-0.208262	0.253724	-0.368621	0.340267			0.421	0.431901	0.639349	0.790799			0.421	0.10482	0.09209	0.75771			0.421
	0.422	-0.0848113	0.0259127	-0.242625	0.157	0.00809509	0.165909			0.422	-0.049176	1.09243	-0.105174	0.191362	-0.130628	0.0844565			0.422	-0.0351764	-0.0313583	0.00300433	0.0182766	0.0437304	0.0500939			0.422	-0.0351764	-0.0313583	-0.182808	0.251179	-0.326622	0.322449			0.422	0.419174	0.645713	0.799708			0.422	0.11755	0.087	0.69917			0.422
	0.423	-0.086084	0.0335489	-0.25917	0.167181	-0.0109953	0.168454			0.423	-0.0428125	1.09243	-0.103902	0.191362	-0.133174	0.037367			0.423	-0.0479033	-0.0453579	0.0144585	0.00809509	0.041185	0.0386396			0.423	-0.0479033	-0.0453579	-0.162445	0.237179	-0.299896	0.300814			0.423	0.419174	0.659712	0.834071			0.423	0.10864	0.10864	0.68135			0.423
	0.424	-0.0835386	0.0551846	-0.261715	0.167181	-0.0122679	0.159545			0.424	-0.0377217	1.09497	-0.0975382	0.19009	-0.133174	0.0386396			0.424	-0.0479033	-0.0300856	0.0119132	0.0170039	0.0399123	0.0475485			0.424	-0.0479033	-0.0300856	-0.153536	0.234634	-0.294805	0.300814			0.424	0.425537	0.672439	0.835343			0.424	0.11118	0.14045	0.68517			0.424
	0.425	-0.0809932	0.0386396	-0.240079	0.179908	-0.0109953	0.149364			0.425	-0.0428125	1.10006	-0.089902	0.200271	-0.135719	0.0539119			0.425	-0.0440852	-0.0453579	-0.00844988	0.0157312	0.0360943	0.0386396			0.425	-0.0440852	-0.0453579	-0.170081	0.239725	-0.287169	0.29445			0.425	0.420447	0.702984	0.868433			0.425	0.09718	0.17864	0.6788			0.425
	0.426	-0.100084	0.0360943	-0.264261	0.186272	-0.0173587	0.158273			0.426	-0.0440852	1.09752	-0.0873566	0.193908	-0.108992	0.0971834			0.426	-0.0249948	-0.0211768	-0.000813741	0.00936778	0.041185	0.0386396			0.426	-0.0249948	-0.0211768	-0.177718	0.233361	-0.284623	0.293178			0.426	0.435719	0.702984	0.854434			0.426	0.09082	0.24227	0.70935			0.426
	0.427	-0.111538	0.0284581	-0.251534	0.179908	-0.0122679	0.153182			0.427	-0.0402671	1.08734	-0.073357	0.19009	-0.116628	0.129001			0.427	-0.0300856	-0.0313583	-0.0059045	0.00300433	0.0399123	0.0424577			0.427	-0.0300856	-0.0313583	-0.157355	0.224452	-0.279533	0.293178			0.427	0.416629	0.705529	0.864615			0.427	0.07427	0.23845	0.7208			0.427
	0.428	-0.0988109	0.0386396	-0.266806	0.172272	-0.0249948	0.173545			0.428	-0.0351764	1.09752	-0.0848113	0.177363	-0.120447	0.139182			0.428	-0.0300856	-0.0517213	-0.0148133	-0.0059045	0.037367	0.0437304			0.428	-0.0300856	-0.0517213	-0.186626	0.22318	-0.294805	0.319904			0.428	0.438264	0.700438	0.883706			0.428	0.08827	0.27281	0.73989			0.428
	0.429	-0.101356	0.0144585	-0.268079	0.169727	-0.0351764	0.157			0.429	-0.0275402	1.09115	-0.0848113	0.174817	-0.089902	0.172272			0.429	-0.0415398	-0.0440852	-0.000813741	-0.073357	0.020822	0.0335489			0.429	-0.0415398	-0.0440852	-0.184081	0.229543	-0.283351	0.335176			0.429	0.416629	0.716983	0.845525			0.429	0.06918	0.29572	0.75644			0.429
	0.43	-0.0886293	0.0233674	-0.257897	0.173545	-0.0224495	0.155727			0.43	-0.0300856	1.07843	-0.0937201	0.181181	-0.11281	0.168454			0.43	-0.0440852	-0.0351764	-0.0122679	-0.032631	0.0297308	0.0195493			0.43	-0.0440852	-0.0351764	-0.19299	0.215543	-0.302441	0.330086			0.43	0.416629	0.741164	0.864615			0.43	0.07173	0.29827	0.80734			0.43
	0.431	-0.089902	0.00173164	-0.260442	0.169727	-0.0377217	0.148091			0.431	-0.0351764	1.07588	-0.0886293	0.188817	-0.0949928	0.165909			0.431	-0.032631	-0.0339037	-0.0262675	-0.00335912	0.0157312	0.037367			0.431	-0.032631	-0.0339037	-0.21208	0.20918	-0.312623	0.30845			0.431	0.391175	0.730983	0.854434			0.431	0.06791	0.27281	0.80862			0.431
	0.432	-0.086084	0.00936778	-0.266806	0.145546	-0.0402671	0.136637			0.432	-0.0428125	1.07461	-0.0822659	0.179908	-0.0937201	0.177363			0.432	-0.0402671	-0.0339037	-0.0186314	-0.000813741	0.0195493	0.0386396			0.432	-0.0402671	-0.0339037	-0.220989	0.196453	-0.322804	0.333904			0.432	0.286814	0.67753	0.802253			0.432	0.073	0.26136	0.8328			0.432
	0.433	-0.0644482	0.0131859	-0.256624	0.144273	-0.0389944	0.130273			0.433	-0.036449	1.06697	-0.0835386	0.178636	-0.0848113	0.170999			0.433	-0.0466306	-0.0313583	-0.0249948	0.00809509	0.0310035	0.0233674			0.433	-0.0466306	-0.0313583	-0.238807	0.22318	-0.303714	0.305905			0.433	0.0971834	0.585896	0.728437			0.433	0.07427	0.24227	0.87352			0.433
	0.434	-0.0669936	0.0106405	-0.282078	0.155727	-0.0377217	0.140455			0.434	-0.0351764	1.06825	-0.0949928	0.188817	-0.11281	0.165909			0.434	-0.0351764	-0.032631	-0.0275402	0.000458949	0.020822	0.0259127			0.434	-0.0351764	-0.032631	-0.237534	0.234634	-0.321532	0.30845			0.434	-0.162445	0.352994	0.590987			0.434	0.10482	0.18627	0.85062			0.434
	0.435	-0.0657209	-0.00717719	-0.293532	0.137909	-0.0440852	0.126455			0.435	-0.0428125	1.05552	-0.0937201	0.186272	-0.089902	0.164636			0.435	-0.0428125	-0.0262675	-0.0313583	-0.00208643	0.0220947	0.0335489			0.435	-0.0428125	-0.0262675	-0.241352	0.219362	-0.334258	0.300814			0.435	-0.438619	0.0475485	0.41281			0.435	0.08446	0.19009	0.85443			0.435
	0.436	-0.0784478	-0.000813741	-0.264261	0.122637	-0.0428125	0.117546			0.436	-0.0173587	1.06188	-0.0886293	0.187544	-0.0937201	0.173545			0.436	-0.0389944	-0.032631	-0.0224495	0.00809509	0.0220947	0.0348216			0.436	-0.0389944	-0.032631	-0.242625	0.243543	-0.33044	0.30845			0.436	-0.696975	-0.276987	0.207907			0.436	0.09082	0.171	0.82262			0.436
	0.437	-0.0466306	-0.00335912	-0.285896	0.135364	-0.036449	0.12391			0.437	-0.0313583	1.0517	-0.0873566	0.198998	-0.0797205	0.182454			0.437	-0.0415398	-0.0186314	-0.0237222	-0.00972257	0.0297308	0.0360943			0.437	-0.0415398	-0.0186314	-0.219716	0.218089	-0.338077	0.293178			0.437	-0.941331	-0.604069	0.0310035			0.437	0.08191	0.14936	0.79971			0.437
	0.438	-0.0402671	-0.000813741	-0.275715	0.130273	-0.0644482	0.111183			0.438	-0.0300856	1.05679	-0.0949928	0.193908	-0.105174	0.149364			0.438	-0.0339037	-0.0288129	-0.00335912	-0.00463181	0.0386396	0.0526392			0.438	-0.0339037	-0.0288129	-0.214626	0.200271	-0.321532	0.282996			0.438	-1.16278	-0.887879	-0.147173			0.438	0.08827	0.13664	0.77044			0.438
	0.439	-0.0351764	0.00809509	-0.275715	0.118819	-0.0631755	0.12391			0.439	-0.0351764	1.04152	-0.0886293	0.188817	-0.0835386	0.151909			0.439	-0.0339037	-0.0135406	-0.0173587	-0.0199041	0.0360943	0.0462758			0.439	-0.0339037	-0.0135406	-0.209535	0.215543	-0.335531	0.284269			0.439	-1.31423	-1.10042	-0.275715			0.439	0.08446	0.14555	0.75135			0.439
	0.44	-0.0453579	-0.00208643	-0.282078	0.134091	-0.0619029	0.122637			0.44	-0.0389944	1.04407	-0.0822659	0.191362	-0.0924474	0.127728			0.44	-0.0440852	-0.0313583	-0.0173587	-0.00335912	0.0233674	0.0500939			0.44	-0.0440852	-0.0313583	-0.195535	0.193908	-0.31135	0.276633			0.44	-1.45932	-1.26459	-0.381348			0.44	0.07427	0.15573	0.72971			0.44
	0.441	-0.0428125	0.00300433	-0.274442	0.10991	-0.0759024	0.116274			0.441	-0.0402671	1.05043	-0.0822659	0.19009	-0.0924474	0.125183			0.441	-0.032631	-0.0224495	-0.00717719	-0.00717719	0.0462758	0.0602754			0.441	-0.032631	-0.0224495	-0.194263	0.206635	-0.322804	0.267724			0.441	-1.5255	-1.38168	-0.484436			0.441	0.05773	0.19264	0.70807			0.441
	0.442	-0.0237222	0.0119132	-0.264261	0.136637	-0.086084	0.130273			0.442	-0.032631	1.04661	-0.0911747	0.191362	-0.0797205	0.108638			0.442	-0.049176	-0.0122679	-0.0122679	-0.000813741	0.0348216	0.0526392			0.442	-0.049176	-0.0122679	-0.163718	0.211725	-0.303714	0.271542			0.442	-1.59295	-1.44532	-0.551888			0.442	0.07427	0.22191	0.71189			0.442
	0.443	-0.0224495	0.00809509	-0.276987	0.120092	-0.0873566	0.131546			0.443	-0.0224495	1.02116	-0.0809932	0.188817	-0.0911747	0.104819			0.443	-0.0517213	-0.0288129	-0.0148133	-0.0059045	0.0310035	0.0437304			0.443	-0.0517213	-0.0288129	-0.158627	0.212998	-0.302441	0.284269			0.443	-1.62731	-1.47841	-0.572251			0.443	0.07937	0.24991	0.71062			0.443
	0.444	-0.016086	0.00300433	-0.262988	0.134091	-0.0784478	0.127728			0.444	-0.0377217	1.02625	-0.0835386	0.193908	-0.086084	0.127728			0.444	-0.0440852	-0.0109953	-0.00335912	-0.00844988	0.0284581	0.0500939			0.444	-0.0440852	-0.0109953	-0.133174	0.205362	-0.287169	0.281723			0.444	-1.62986	-1.49241	-0.593887			0.444	0.07682	0.2919	0.71826			0.444
	0.445	-0.0109953	0.00173164	-0.264261	0.146818	-0.086084	0.130273			0.445	-0.0377217	1.03007	-0.0809932	0.200271	-0.11281	0.115001			0.445	-0.0428125	-0.00717719	-0.0199041	-0.00717719	0.0437304	0.0500939			0.445	-0.0428125	-0.00717719	-0.121719	0.232089	-0.287169	0.253724			0.445	-1.64258	-1.47968	-0.578615			0.445	0.06664	0.28681	0.77425			0.445
	0.446	-0.000813741	-0.000813741	-0.276987	0.134091	-0.0911747	0.120092			0.446	-0.0402671	1.02116	-0.073357	0.193908	-0.0835386	0.129001			0.446	-0.0313583	-0.0122679	-0.0249948	-0.0173587	0.0297308	0.0488212			0.446	-0.0313583	-0.0122679	-0.119174	0.22827	-0.273169	0.289359			0.446	-1.58913	-1.43259	-0.546798			0.446	0.07427	0.30081	0.79716			0.446
	0.447	-0.0059045	0.00300433	-0.266806	0.127728	-0.101356	0.120092			0.447	-0.0377217	1.02752	-0.086084	0.179908	-0.0784478	0.153182			0.447	-0.0249948	0.000458949	-0.00844988	-0.016086	0.0284581	0.0297308			0.447	-0.0249948	0.000458949	-0.0937201	0.233361	-0.242625	0.293178			0.447	-1.56495	-1.39823	-0.522617			0.447	0.06791	0.32372	0.84425			0.447
	0.448	-0.0122679	-0.000813741	-0.268079	0.144273	-0.0924474	0.130273			0.448	-0.0389944	1.00716	-0.0886293	0.186272	-0.0708117	0.149364			0.448	-0.0339037	-0.0135406	-0.00844988	-0.0173587	0.0195493	0.0297308			0.448	-0.0339037	-0.0135406	-0.086084	0.24227	-0.251534	0.291905			0.448	-1.50259	-1.32187	-0.460255			0.448	0.06791	0.30845	0.88243			0.448
	0.449	0.00173164	-0.00208643	-0.273169	0.145546	-0.105174	0.127728			0.449	-0.0389944	1.01225	-0.0784478	0.182454	-0.0835386	0.130273			0.449	-0.0351764	0.0068224	-0.00208643	-0.0122679	0.0195493	0.0475485			0.449	-0.0351764	0.0068224	-0.0835386	0.22318	-0.236261	0.307177			0.449	-1.42623	-1.23532	-0.409347			0.449	0.05009	0.29827	0.88498			0.449
	0.45	0.00809509	-0.0135406	-0.256624	0.141728	-0.102629	0.116274			0.45	-0.0402671	0.99952	-0.0784478	0.169727	-0.0606302	0.160818			0.45	-0.032631	-0.00208643	-0.0211768	0.00554971	0.0220947	0.0437304			0.45	-0.032631	-0.00208643	-0.0873566	0.239725	-0.237534	0.288087			0.45	-1.36768	-1.16787	-0.364803			0.45	0.07937	0.25245	0.9168			0.45
	0.451	0.0170039	0.0068224	-0.260442	0.146818	-0.106447	0.140455			0.451	-0.0300856	1.01097	-0.0568121	0.160818	-0.0440852	0.159545			0.451	-0.0173587	-0.00208643	0.000458949	-0.0109953	0.0233674	0.0386396			0.451	-0.0173587	-0.00208643	-0.0669936	0.226998	-0.214626	0.299541			0.451	-1.30659	-1.07369	-0.302441			0.451	0.07046	0.21427	0.95116			0.451
	0.452	0.0170039	-0.0109953	-0.260442	0.149364	-0.0911747	0.131546			0.452	-0.0339037	1.00588	-0.0682663	0.177363	-0.052994	0.174817			0.452	-0.032631	-0.00208643	-0.0122679	0.00427702	0.0220947	0.0488212			0.452	-0.032631	-0.00208643	-0.0911747	0.221907	-0.215898	0.305905			0.452	-1.24932	-0.98333	-0.256624			0.452	0.073	0.19773	0.95116			0.452
	0.453	0.0106405	0.0195493	-0.251534	0.145546	-0.116628	0.129001			0.453	-0.0300856	1.00207	-0.073357	0.182454	-0.0313583	0.184999			0.453	-0.0224495	0.00427702	-0.0122679	-0.000813741	0.0310035	0.0437304			0.453	-0.0224495	0.00427702	-0.0949928	0.229543	-0.219716	0.303359			0.453	-1.1666	-0.882788	-0.185354			0.453	0.09209	0.15445	0.94989			0.453
	0.454	0.00936778	0.0195493	-0.257897	0.140455	-0.089902	0.131546			0.454	-0.032631	0.993157	-0.0619029	0.172272	-0.0389944	0.174817			0.454	-0.0173587	0.00300433	0.00173164	-0.00208643	0.0259127	0.0564573			0.454	-0.0173587	0.00300433	-0.0937201	0.22318	-0.224807	0.30845			0.454	-1.07624	-0.792427	-0.14081			0.454	0.06664	0.143	0.9168			0.454
	0.455	0.00300433	0.0157312	-0.25917	0.146818	-0.0988109	0.145546			0.455	-0.0288129	0.99443	-0.0606302	0.177363	-0.0377217	0.168454			0.455	-0.0262675	0.0119132	-0.0135406	0.00300433	0.0360943	0.0551846			0.455	-0.0262675	0.0119132	-0.0924474	0.224452	-0.218444	0.310995			0.455	-1.01642	-0.696975	-0.0835386			0.455	0.06918	0.16082	0.85316			0.455
	0.456	0.0144585	0.0119132	-0.256624	0.144273	-0.11281	0.120092			0.456	-0.0249948	0.993157	-0.0682663	0.192635	-0.032631	0.179908			0.456	-0.0224495	0.000458949	-0.00335912	-0.00463181	0.0297308	0.0450031			0.456	-0.0224495	0.000458949	-0.0682663	0.225725	-0.209535	0.30845			0.456	-0.924786	-0.593887	-0.0135406			0.456	0.09082	0.14936	0.85571			0.456
	0.457	0.0170039	0.00300433	-0.240079	0.130273	-0.103902	0.137909			0.457	-0.0173587	0.989339	-0.0580848	0.169727	-0.0148133	0.177363			0.457	-0.00717719	0.00809509	-0.0186314	0.0068224	0.0335489	0.0246401			0.457	-0.00717719	0.00809509	-0.0848113	0.237179	-0.222262	0.291905			0.457	-0.852243	-0.50989	0.0157312			0.457	0.07555	0.14045	0.84043			0.457
	0.458	0.0310035	0.0182766	-0.242625	0.139182	-0.102629	0.136637			0.458	-0.0313583	0.998248	-0.0389944	0.184999	-0.0173587	0.178636			0.458	-0.00844988	0.0119132	0.0068224	0.00427702	0.0399123	0.0717296			0.458	-0.00844988	0.0119132	-0.0797205	0.232089	-0.21208	0.285541			0.458	-0.784791	-0.41062	0.0704569			0.458	0.08827	0.18118	0.82262			0.458
	0.459	0.0170039	0.00300433	-0.256624	0.151909	-0.114083	0.132819			0.459	-0.032631	0.991884	-0.0631755	0.182454	-0.0288129	0.163363			0.459	-0.0135406	0.00809509	-0.0059045	-0.000813741	0.0360943	0.0590027			0.459	-0.0135406	0.00809509	-0.0415398	0.237179	-0.222262	0.302086			0.459	-0.703338	-0.338077	0.150636			0.459	0.09973	0.21173	0.81244			0.459
	0.46	0.0170039	0.0106405	-0.243897	0.163363	-0.0937201	0.12391			0.46	-0.0224495	0.984248	-0.0453579	0.186272	-0.0249948	0.165909			0.46	-0.00717719	0.0246401	0.0170039	-0.00208643	0.0475485	0.0526392			0.46	-0.00717719	0.0246401	-0.0377217	0.239725	-0.191717	0.271542			0.46	-0.624432	-0.257897	0.197726			0.46	0.06409	0.26136	0.82262			0.46
	0.461	0.0360943	0.0106405	-0.238807	0.140455	-0.117901	0.145546			0.461	-0.016086	0.989339	-0.0555394	0.184999	0.00427702	0.174817			0.461	-0.0122679	0.00300433	-0.0109953	0.0170039	0.0475485	0.0551846			0.461	-0.0122679	0.00300433	-0.0122679	0.24227	-0.186626	0.267724			0.461	-0.558252	-0.164991	0.191362			0.461	0.08955	0.28681	0.79971			0.461
	0.462	0.0462758	0.0144585	-0.241352	0.153182	-0.110265	0.136637			0.462	-0.0148133	0.98043	-0.00844988	0.192635	-0.0224495	0.168454			0.462	-0.0135406	0.0106405	0.00173164	0.00173164	0.05773	0.061548			0.462	-0.0135406	0.0106405	0.00300433	0.243543	-0.156082	0.257542			0.462	-0.479345	-0.0949928	0.251179			0.462	0.101	0.29063	0.82007			0.462
	0.463	0.0399123	0.0131859	-0.243897	0.154454	-0.122992	0.134091			0.463	-0.016086	0.979157	-0.0262675	0.188817	-0.0211768	0.165909			0.463	-0.0135406	0.0106405	0.0106405	0.00809509	0.0399123	0.0564573			0.463	-0.0135406	0.0106405	0.0106405	0.220634	-0.148446	0.252451			0.463	-0.415711	-0.032631	0.277905			0.463	0.07555	0.28809	0.89261			0.463
	0.464	0.0386396	0.0157312	-0.242625	0.16209	-0.116628	0.149364			0.464	-0.0211768	0.975339	-0.0351764	0.186272	-0.0275402	0.157			0.464	0.0068224	0.0310035	0.0157312	-0.0059045	0.0539119	0.074275			0.464	0.0068224	0.0310035	0.0259127	0.219362	-0.131901	0.262633			0.464	-0.349531	0.0271854	0.323722			0.464	0.07427	0.27791	0.93461			0.464
	0.465	0.0284581	0.00300433	-0.237534	0.179908	-0.105174	0.160818			0.465	-0.0211768	0.958794	-0.0186314	0.178636	-0.0237222	0.169727			0.465	-0.00844988	0.0233674	-0.000813741	0.0182766	0.0424577	0.0679115			0.465	-0.00844988	0.0233674	0.0170039	0.226998	-0.103902	0.277905			0.465	-0.302441	0.094638	0.377175			0.465	0.087	0.26391	0.94607			0.465
	0.466	0.0475485	0.0195493	-0.233716	0.153182	-0.11281	0.131546			0.466	-0.0109953	0.968976	-0.0262675	0.197726	-0.00208643	0.144273			0.466	-0.00972257	0.0284581	0.00809509	0.00300433	0.0590027	0.0640934			0.466	-0.00972257	0.0284581	0.0233674	0.225725	-0.111538	0.267724			0.466	-0.220989	0.145546	0.414083			0.466	0.06664	0.25627	0.96007			0.466
	0.467	0.0310035	0.0195493	-0.234989	0.179908	-0.12681	0.146818			0.467	-0.00844988	0.971521	-0.0148133	0.182454	-0.00463181	0.149364			0.467	-0.016086	0.020822	0.0131859	0.0131859	0.0450031	0.0653661			0.467	-0.016086	0.020822	0.0335489	0.239725	-0.0988109	0.271542			0.467	-0.164991	0.205362	0.447173			0.467	0.08827	0.23082	0.93207			0.467
	0.468	0.0437304	0.00300433	-0.231171	0.179908	-0.115356	0.155727			0.468	-0.016086	0.960067	-0.0122679	0.187544	-0.0135406	0.154454			0.468	-0.0122679	0.0322762	0.0106405	0.0182766	0.0513665	0.0488212			0.468	-0.0122679	0.0322762	0.0322762	0.246088	-0.101356	0.302086			0.468	-0.105174	0.247361	0.457355			0.468	0.09464	0.20027	0.95116			0.468
	0.469	0.0462758	0.0106405	-0.234989	0.165909	-0.101356	0.130273			0.469	-0.0122679	0.958794	-0.00335912	0.188817	0.00936778	0.137909			0.469	0.00554971	0.0233674	0.0106405	0.0170039	0.0437304	0.0488212			0.469	0.00554971	0.0233674	0.0310035	0.244815	-0.0619029	0.310995			0.469	-0.0631755	0.300814	0.501899			0.469	0.06918	0.15064	0.9397			0.469
	0.47	0.0386396	0.0131859	-0.237534	0.173545	-0.120447	0.151909			0.47	-0.00717719	0.954976	0.00427702	0.202817	-0.00972257	0.150636			0.47	-0.000813741	0.0220947	0.020822	0.0144585	0.0590027	0.0666388			0.47	-0.000813741	0.0220947	0.0246401	0.216816	-0.0657209	0.307177			0.47	-0.0275402	0.345358	0.527353			0.47	0.09464	0.10482	0.94479			0.47
	0.471	0.0513665	0.00936778	-0.218444	0.164636	-0.114083	0.136637			0.471	0.00300433	0.948613	-0.0109953	0.192635	-0.00208643	0.191362			0.471	-0.016086	0.0297308	0.0068224	0.0119132	0.0526392	0.0640934			0.471	-0.016086	0.0297308	0.0284581	0.221907	-0.052994	0.312268			0.471	0.037367	0.373357	0.547716			0.471	0.07555	0.115	0.89134			0.471
	0.472	0.05773	-0.000813741	-0.217171	0.178636	-0.125537	0.158273			0.472	0.000458949	0.954976	-0.016086	0.179908	0.0182766	0.193908			0.472	0.0131859	0.0322762	0.0144585	0.0119132	0.0526392	0.0691842			0.472	0.0131859	0.0322762	0.0297308	0.233361	-0.0835386	0.303359			0.472	0.0768203	0.398811	0.571897			0.472	0.07809	0.13918	0.8468			0.472
	0.473	0.0462758	0.0170039	-0.220989	0.174817	-0.110265	0.150636			0.473	0.00173164	0.949886	-0.000813741	0.17609	0.0119132	0.192635			0.473	-0.00208643	0.0310035	0.00300433	0.0195493	0.0450031	0.0513665			0.473	-0.00208643	0.0310035	0.0259127	0.225725	-0.0644482	0.316086			0.473	0.108638	0.430628	0.59735			0.473	0.07809	0.14555	0.85189			0.473
	0.474	0.0513665	0.0119132	-0.210808	0.170999	-0.114083	0.164636			0.474	-0.00208643	0.946067	-0.00972257	0.188817	0.0131859	0.195181			0.474	-0.00208643	0.041185	0.00300433	0.00300433	0.0526392	0.0488212			0.474	-0.00208643	0.041185	0.0106405	0.24227	-0.0555394	0.317359			0.474	0.125183	0.463718	0.610077			0.474	0.08827	0.16718	0.80225			0.474
	0.475	0.0628207	0.00554971	-0.210808	0.183726	-0.125537	0.150636			0.475	-0.00208643	0.940977	-0.00844988	0.193908	0.0131859	0.224452			0.475	-0.00335912	0.0450031	0.0259127	0.00300433	0.0539119	0.0488212			0.475	-0.00335912	0.0450031	-0.00335912	0.246088	-0.0415398	0.310995			0.475	0.151909	0.47899	0.645713			0.475	0.06664	0.19645	0.80225			0.475
	0.476	0.05773	0.0233674	-0.215898	0.179908	-0.10772	0.157			0.476	-0.00335912	0.934613	-0.00717719	0.182454	0.0271854	0.195181			0.476	0.0068224	0.0259127	0.0157312	0.0119132	0.0730023	0.0704569			0.476	0.0068224	0.0259127	-0.00717719	0.24227	-0.0580848	0.307177			0.476	0.168454	0.501899	0.659712			0.476	0.07555	0.22063	0.80734			0.476
	0.477	0.074275	0.0068224	-0.220989	0.157	-0.120447	0.165909			0.477	0.000458949	0.930795	-0.0135406	0.188817	0.0310035	0.17609			0.477	-0.000813741	0.0386396	0.00554971	0.0182766	0.0704569	0.0704569			0.477	-0.000813741	0.0386396	-0.0173587	0.253724	-0.0593575	0.317359			0.477	0.192635	0.515898	0.668621			0.477	0.07682	0.26391	0.80225			0.477
	0.478	0.0768203	0.0119132	-0.222262	0.187544	-0.108992	0.151909			0.478	-0.00463181	0.925704	-0.00208643	0.188817	0.0131859	0.204089			0.478	-0.00335912	0.0310035	0.020822	0.00809509	0.0590027	0.0513665			0.478	-0.00335912	0.0310035	-0.0249948	0.24227	-0.0746297	0.312268			0.478	0.211725	0.536261	0.680075			0.478	0.09082	0.26645	0.84425			0.478
	0.479	0.0666388	0.0131859	-0.218444	0.201544	-0.114083	0.145546			0.479	-0.00844988	0.923159	-0.00972257	0.181181	0.00809509	0.197726			0.479	-0.000813741	0.0399123	0.0246401	0.0119132	0.0640934	0.0704569			0.479	-0.000813741	0.0399123	-0.0351764	0.266451	-0.0593575	0.302086			0.479	0.233361	0.533716	0.683893			0.479	0.08955	0.27918	0.83916			0.479
	0.48	0.061548	0.0157312	-0.210808	0.168454	-0.11281	0.148091			0.48	-0.000813741	0.918068	-0.0224495	0.181181	0.00554971	0.17609			0.48	0.00427702	0.0335489	0.0157312	0.000458949	0.0806384	0.0488212			0.48	0.00427702	0.0335489	-0.0224495	0.252451	-0.0606302	0.310995			0.48	0.235906	0.557897	0.683893			0.48	0.087	0.31354	0.87352			0.48
	0.481	0.0691842	0.020822	-0.200626	0.172272	-0.117901	0.172272			0.481	-0.000813741	0.91425	-0.0122679	0.17609	-0.00335912	0.195181			0.481	0.00427702	0.037367	0.0170039	0.00554971	0.0628207	0.0628207			0.481	0.00427702	0.037367	-0.0288129	0.248633	-0.0720844	0.30845			0.481	0.262633	0.564261	0.681348			0.481	0.07682	0.28936	0.92061			0.481
	0.482	0.0844565	0.0170039	-0.210808	0.186272	-0.119174	0.169727			0.482	-0.00463181	0.911705	-0.0135406	0.172272	0.0233674	0.172272			0.482	-0.00844988	0.0526392	0.0119132	0.0106405	0.0806384	0.0691842			0.482	-0.00844988	0.0526392	-0.0237222	0.234634	-0.0784478	0.300814			0.482	0.260088	0.568079	0.673712			0.482	0.09337	0.27281	0.94352			0.482
	0.483	0.078093	0.020822	-0.203171	0.188817	-0.106447	0.174817			0.483	-0.00208643	0.906614	-0.00844988	0.172272	0.00300433	0.168454			0.483	0.00300433	0.0399123	0.00809509	0.0310035	0.0526392	0.0526392			0.483	0.00300433	0.0399123	-0.016086	0.240997	-0.0606302	0.305905			0.483	0.300814	0.589714	0.683893			0.483	0.11246	0.24991	0.94989			0.483
	0.484	0.061548	0.0233674	-0.203171	0.195181	-0.122992	0.168454			0.484	0.00300433	0.898978	-0.0135406	0.182454	0.0195493	0.160818			0.484	-0.0109953	0.0539119	0.0335489	0.0068224	0.0844565	0.0539119			0.484	-0.0109953	0.0539119	-0.0122679	0.24227	-0.0568121	0.299541			0.484	0.310995	0.59735	0.687711			0.484	0.08191	0.18627	0.95498			0.484
	0.485	0.0908199	0.0322762	-0.209535	0.193908	-0.111538	0.160818			0.485	-0.00208643	0.900251	0.00427702	0.173545	0.0246401	0.154454			0.485	-0.00463181	0.0399123	0.0119132	0.0144585	0.0666388	0.0488212			0.485	-0.00463181	0.0399123	0.00809509	0.25627	-0.0580848	0.302086			0.485	0.336449	0.590987	0.63044			0.485	0.10355	0.19391	0.94861			0.485
	0.486	0.0691842	0.00300433	-0.194263	0.192635	-0.116628	0.159545			0.486	0.00300433	0.890069	-0.0135406	0.187544	0.0106405	0.145546			0.486	-0.00208643	0.0386396	0.0182766	0.0259127	0.0730023	0.0386396			0.486	-0.00208643	0.0386396	-0.00208643	0.24227	-0.069539	0.312268			0.486	0.330086	0.613895	0.648258			0.486	0.08446	0.16591	0.9397			0.486
	0.487	0.0882745	0.0259127	-0.208262	0.205362	-0.119174	0.182454			0.487	0.00300433	0.888796	0.000458949	0.181181	0.0131859	0.160818			0.487	0.00809509	0.0386396	0.0246401	0.00936778	0.0691842	0.0399123			0.487	0.00809509	0.0386396	-0.00717719	0.24227	-0.0351764	0.312268			0.487	0.36063	0.606259	0.648258			0.487	0.087	0.12646	0.91298			0.487
	0.488	0.0666388	0.0170039	-0.201899	0.196453	-0.115356	0.16209			0.488	0.00554971	0.873524	0.00173164	0.186272	0.0297308	0.154454			0.488	0.00427702	0.0424577	0.0144585	0.0233674	0.0691842	0.0437304			0.488	0.00427702	0.0424577	-0.0148133	0.252451	-0.0313583	0.317359			0.488	0.383539	0.615168	0.671166			0.488	0.09973	0.16591	0.88371			0.488
	0.489	0.0640934	0.0170039	-0.204444	0.202817	-0.0886293	0.165909			0.489	0.00936778	0.887524	0.0246401	0.173545	0.0233674	0.149364			0.489	-0.0059045	0.0488212	0.0170039	0.0068224	0.0819111	0.0526392			0.489	-0.0059045	0.0488212	0.0157312	0.237179	-0.036449	0.319904			0.489	0.382266	0.620259	0.640622			0.489	0.07173	0.13027	0.87861			0.489
	0.49	0.0895472	0.0182766	-0.187899	0.202817	-0.110265	0.172272			0.49	0.00554971	0.878615	0.0144585	0.170999	0.0271854	0.151909			0.49	-0.0122679	0.0462758	0.0259127	0.0233674	0.0768203	0.0424577			0.49	-0.0122679	0.0462758	-0.0148133	0.234634	-0.0288129	0.305905			0.49	0.40772	0.626622	0.650803			0.49	0.09846	0.14427	0.8468			0.49
	0.491	0.0755476	0.0233674	-0.198081	0.201544	-0.119174	0.173545			0.491	0.0131859	0.864615	0.0131859	0.150636	0.0348216	0.155727			0.491	-0.0237222	0.0500939	0.020822	0.0119132	0.0793657	0.0488212			0.491	-0.0237222	0.0500939	-0.0224495	0.254997	-0.036449	0.310995			0.491	0.405174	0.646985	0.662258			0.491	0.08446	0.19391	0.80734			0.491
	0.492	0.074275	0.000458949	-0.205717	0.197726	-0.115356	0.154454			0.492	0.00936778	0.854434	0.00554971	0.170999	0.0284581	0.141728			0.492	-0.0262675	0.0386396	0.0195493	0.00554971	0.0806384	0.0500939			0.492	-0.0262675	0.0386396	-0.0122679	0.24227	-0.0237222	0.321177			0.492	0.430628	0.648258	0.646985			0.492	0.09082	0.24482	0.82262			0.492
	0.493	0.0997288	0.0119132	-0.205717	0.198998	-0.105174	0.169727			0.493	0.0106405	0.856979	-0.00208643	0.169727	0.0157312	0.140455			0.493	-0.00335912	0.05773	0.00554971	0.0106405	0.0933653	0.0551846			0.493	-0.00335912	0.05773	0.00300433	0.240997	-0.0224495	0.344085			0.493	0.434446	0.643167	0.660985			0.493	0.10864	0.27154	0.82771			0.493
	0.494	0.102274	0.0310035	-0.181536	0.188817	-0.115356	0.172272			0.494	0.0170039	0.858252	0.0297308	0.173545	0.0348216	0.150636			0.494	-0.00335912	0.074275	0.0119132	0.0195493	0.0730023	0.037367			0.494	-0.00335912	0.074275	-0.00844988	0.243543	-0.0224495	0.336449			0.494	0.410265	0.636804	0.672439			0.494	0.07427	0.27536	0.82262			0.494
	0.495	0.0971834	0.0297308	-0.19299	0.191362	-0.117901	0.167181			0.495	0.0220947	0.849343	0.0157312	0.16209	0.0360943	0.141728			0.495	-0.00972257	0.0500939	0.0157312	0.0131859	0.0831838	0.0462758			0.495	-0.00972257	0.0500939	-0.0122679	0.224452	-0.0351764	0.326267			0.495	0.4459	0.64444	0.685166			0.495	0.08827	0.2919	0.87989			0.495
	0.496	0.0870019	0.0259127	-0.19299	0.201544	-0.0962655	0.165909			0.496	0.0157312	0.839162	0.0233674	0.157	0.0424577	0.146818			0.496	-0.0186314	0.0539119	0.00936778	0.00809509	0.0831838	0.0513665			0.496	-0.0186314	0.0539119	-0.0148133	0.237179	-0.0275402	0.335176			0.496	0.453537	0.627895	0.673712			0.496	0.087	0.29572	0.88752			0.496
	0.497	0.103547	0.0220947	-0.190444	0.20918	-0.129355	0.17609			0.497	0.0170039	0.846798	0.0437304	0.169727	0.0462758	0.170999			0.497	-0.0148133	0.0564573	0.0246401	0.0131859	0.101001	0.0539119			0.497	-0.0148133	0.0564573	0.0195493	0.240997	-0.0262675	0.310995			0.497	0.461173	0.645713	0.667348			0.497	0.07427	0.31354	0.93334			0.497
	0.498	0.0920926	0.0182766	-0.200626	0.211725	-0.111538	0.165909			0.498	0.0271854	0.82898	0.0322762	0.16209	0.0348216	0.164636			0.498	-0.0199041	0.0488212	0.0170039	0.0144585	0.0806384	0.0399123			0.498	-0.0199041	0.0488212	0.0259127	0.240997	-0.0288129	0.322449			0.498	0.464991	0.638077	0.66353			0.498	0.07555	0.27154	0.9397			0.498
	0.499	0.0933653	0.0170039	-0.190444	0.198998	-0.0924474	0.174817			0.499	0.0284581	0.821344	0.0322762	0.146818	0.0526392	0.149364			0.499	-0.0237222	0.0640934	0.0144585	0.0119132	0.0793657	0.041185			0.499	-0.0237222	0.0640934	0.0106405	0.24227	-0.0275402	0.314813			0.499	0.467536	0.635531	0.659712			0.499	0.09337	0.28809	0.93716			0.499
	0.5	0.0997288	0.0182766	-0.182808	0.198998	-0.103902	0.165909			0.5	0.0259127	0.830253	0.0233674	0.151909	0.0513665	0.154454			0.5	-0.00844988	0.0691842	0.0233674	0.0157312	0.0984561	0.0322762			0.5	-0.00844988	0.0691842	0.00936778	0.237179	-0.0288129	0.323722			0.5	0.475172	0.621532	0.66353			0.5	0.08827	0.22573	0.99825			0.5
	0.501	0.0997288	0.0220947	-0.182808	0.186272	-0.114083	0.168454			0.501	0.0157312	0.820071	0.037367	0.150636	0.0526392	0.164636			0.501	-0.0224495	0.0475485	0.0233674	0.00809509	0.0959107	0.0488212			0.501	-0.0224495	0.0475485	0.0335489	0.24227	-0.0275402	0.322449			0.501	0.467536	0.640622	0.652076			0.501	0.08573	0.18245	0.98043			0.501
	0.502	0.107365	0.0284581	-0.177718	0.193908	-0.108992	0.182454			0.502	0.0195493	0.822616	0.0424577	0.154454	0.0475485	0.155727			0.502	-0.00844988	0.0424577	0.0119132	0.00809509	0.0908199	0.037367			0.502	-0.00844988	0.0424577	0.0386396	0.22318	-0.0148133	0.319904			0.502	0.480263	0.63044	0.632986			0.502	0.07937	0.171	0.98679			0.502
	0.503	0.0933653	0.0119132	-0.175172	0.200271	-0.101356	0.173545			0.503	0.0310035	0.803526	0.037367	0.165909	0.0488212	0.154454			0.503	-0.016086	0.0590027	0.0335489	0.00554971	0.0870019	0.0399123			0.503	-0.016086	0.0590027	0.0335489	0.24227	-0.0173587	0.30845			0.503	0.491717	0.618986	0.652076			0.503	0.08191	0.143	0.97534			0.503
	0.504	0.0997288	0.0284581	-0.175172	0.206635	-0.102629	0.174817			0.504	0.0259127	0.800981	0.0322762	0.145546	0.0475485	0.149364			0.504	-0.00844988	0.0399123	0.0131859	0.0119132	0.0793657	0.0284581			0.504	-0.00844988	0.0399123	0.0513665	0.230816	-0.00335912	0.323722			0.504	0.477718	0.622804	0.622804			0.504	0.07809	0.16209	0.93589			0.504
	0.505	0.0882745	0.0170039	-0.180263	0.195181	-0.0962655	0.17609			0.505	0.0284581	0.790799	0.05773	0.148091	0.0590027	0.132819			0.505	-0.0122679	0.0539119	0.0284581	0.0182766	0.0844565	0.037367			0.505	-0.0122679	0.0539119	0.0653661	0.235906	-0.0122679	0.319904			0.505	0.489172	0.624077	0.627895			0.505	0.09337	0.15318	0.86971			0.505
	0.506	0.0908199	0.0259127	-0.187899	0.188817	-0.100084	0.163363			0.506	0.0348216	0.794617	0.037367	0.160818	0.0488212	0.135364			0.506	-0.016086	0.0628207	0.0360943	0.00936778	0.101001	0.0284581			0.506	-0.016086	0.0628207	0.0640934	0.233361	-0.0122679	0.299541			0.506	0.477718	0.618986	0.615168			0.506	0.08318	0.14682	0.8608			0.506
	0.507	0.0857292	0.0271854	-0.1739	0.196453	-0.0873566	0.16209			0.507	0.037367	0.792072	0.0551846	0.160818	0.0539119	0.131546			0.507	-0.0109953	0.0640934	0.0182766	0.00936778	0.0831838	0.0437304			0.507	-0.0109953	0.0640934	0.0870019	0.229543	0.0182766	0.303359			0.507	0.489172	0.610077	0.607532			0.507	0.09846	0.15064	0.8468			0.507
	0.508	0.0997288	0.00427702	-0.164991	0.196453	-0.0962655	0.163363			0.508	0.0284581	0.778072	0.037367	0.154454	0.061548	0.118819			0.508	-0.00335912	0.074275	0.0220947	0.0131859	0.0895472	0.0386396			0.508	-0.00335912	0.074275	0.094638	0.225725	0.0628207	0.304632			0.508	0.476445	0.603714	0.59735			0.508	0.10227	0.17482	0.83662			0.508
	0.509	0.094638	0.0310035	-0.171354	0.205362	-0.0809932	0.170999			0.509	0.0322762	0.770436	0.037367	0.157	0.0526392	0.121365			0.509	-0.016086	0.05773	0.020822	0.0259127	0.103547	0.0399123			0.509	-0.016086	0.05773	0.0959107	0.248633	0.0640934	0.305905			0.509	0.475172	0.616441	0.57826			0.509	0.087	0.23082	0.83916			0.509
	0.51	0.0971834	0.0182766	-0.166263	0.198998	-0.0988109	0.174817			0.51	0.0310035	0.775527	0.0475485	0.145546	0.061548	0.103547			0.51	-0.032631	0.0513665	0.0284581	0.00936778	0.0831838	0.0182766			0.51	-0.032631	0.0513665	0.094638	0.237179	0.0997288	0.310995			0.51	0.481536	0.598623	0.587169			0.51	0.09337	0.26518	0.80607			0.51
	0.511	0.0997288	0.00936778	-0.170081	0.196453	-0.0886293	0.181181			0.511	0.0424577	0.775527	0.0335489	0.144273	0.0691842	0.129001			0.511	-0.0224495	0.0437304	0.0170039	0.0284581	0.101001	0.0475485			0.511	-0.0224495	0.0437304	0.108638	0.237179	0.0895472	0.288087			0.511	0.486626	0.585896	0.580805			0.511	0.09337	0.26263	0.83153			0.511
	0.512	0.108638	0.0424577	-0.172627	0.201544	-0.10772	0.182454			0.512	0.0271854	0.765346	0.0386396	0.143	0.0526392	0.107365			0.512	-0.0122679	0.05773	0.00173164	0.0195493	0.0895472	0.0246401			0.512	-0.0122679	0.05773	0.0933653	0.232089	0.078093	0.299541			0.512	0.467536	0.606259	0.560442			0.512	0.09082	0.29827	0.8468			0.512
	0.513	0.0997288	0.0119132	-0.176445	0.191362	-0.0924474	0.172272			0.513	0.0170039	0.755164	0.05773	0.139182	0.0755476	0.107365			0.513	-0.0249948	0.0691842	0.0233674	0.0170039	0.094638	0.0233674			0.513	-0.0249948	0.0691842	0.118819	0.214271	0.0360943	0.312268			0.513	0.485354	0.584623	0.547716			0.513	0.08446	0.29827	0.88371			0.513
	0.514	0.120092	0.020822	-0.1599	0.184999	-0.086084	0.169727			0.514	0.0360943	0.751346	0.041185	0.157	0.0691842	0.121365			0.514	-0.0173587	0.0640934	0.0220947	0.0068224	0.0870019	0.0360943			0.514	-0.0173587	0.0640934	0.10991	0.235906	0.0399123	0.304632			0.514	0.470081	0.566806	0.546443			0.514	0.08573	0.28809	0.93716			0.514
	0.515	0.0984561	0.0259127	-0.156082	0.205362	-0.0975382	0.165909			0.515	0.0335489	0.7488	0.0679115	0.143	0.074275	0.10991			0.515	-0.0211768	0.0590027	0.0246401	0.0195493	0.106092	0.0271854			0.515	-0.0211768	0.0590027	0.0971834	0.233361	0.0424577	0.291905			0.515	0.481536	0.580805	0.538807			0.515	0.10482	0.27791	0.96007			0.515
	0.516	0.103547	0.0195493	-0.162445	0.205362	-0.0886293	0.187544			0.516	0.037367	0.7488	0.0640934	0.130273	0.0691842	0.108638			0.516	-0.0275402	0.061548	0.0322762	0.0182766	0.10991	0.037367			0.516	-0.0275402	0.061548	0.116274	0.233361	0.0526392	0.30845			0.516	0.452264	0.573169	0.533716			0.516	0.09846	0.28045	0.96134			0.516
	0.517	0.107365	0.0220947	-0.156082	0.187544	-0.086084	0.172272			0.517	0.0424577	0.724619	0.0602754	0.155727	0.0806384	0.116274			0.517	-0.0173587	0.0628207	0.0195493	0.00427702	0.0984561	0.0259127			0.517	-0.0173587	0.0628207	0.104819	0.232089	0.0348216	0.303359			0.517	0.453537	0.569351	0.531171			0.517	0.087	0.24736	0.97152			0.517
	0.518	0.10991	0.0233674	-0.171354	0.201544	-0.103902	0.169727			0.518	0.0284581	0.727165	0.0513665	0.120092	0.0730023	0.126455			0.518	-0.0237222	0.0730023	0.00936778	0.0157312	0.0959107	0.0259127			0.518	-0.0237222	0.0730023	0.112456	0.234634	0.0386396	0.310995			0.518	0.464991	0.547716	0.532443			0.518	0.08955	0.20027	0.95879			0.518
	0.519	0.12391	0.0119132	-0.158627	0.195181	-0.0962655	0.157			0.519	0.0386396	0.724619	0.0500939	0.120092	0.078093	0.131546			0.519	-0.0122679	0.0691842	0.0259127	0.0182766	0.101001	0.0450031			0.519	-0.0122679	0.0691842	0.117546	0.244815	0.0450031	0.302086			0.519	0.463718	0.552806	0.519716			0.519	0.08827	0.16082	0.96261			0.519
	0.52	0.10991	0.0386396	-0.158627	0.182454	-0.0911747	0.179908			0.52	0.0335489	0.719529	0.0691842	0.131546	0.0806384	0.125183			0.52	-0.0148133	0.0488212	0.020822	0.0322762	0.104819	0.0424577			0.52	-0.0148133	0.0488212	0.122637	0.224452	0.0360943	0.310995			0.52	0.450991	0.54517	0.531171			0.52	0.08318	0.14555	0.94861			0.52
	0.521	0.115001	0.0144585	-0.164991	0.19009	-0.086084	0.169727			0.521	0.0386396	0.714438	0.037367	0.131546	0.0679115	0.120092			0.521	-0.00717719	0.0590027	0.0131859	0.0271854	0.106092	0.0539119			0.521	-0.00717719	0.0590027	0.125183	0.233361	0.0348216	0.295723			0.521	0.425537	0.524807	0.504444			0.521	0.09846	0.15318	0.89389			0.521
	0.522	0.120092	0.0322762	-0.154809	0.195181	-0.100084	0.172272			0.522	0.0322762	0.72971	0.0526392	0.145546	0.0768203	0.111183			0.522	-0.0186314	0.0500939	0.037367	0.0246401	0.10991	0.0399123			0.522	-0.0186314	0.0500939	0.127728	0.225725	0.0386396	0.284269			0.522	0.438264	0.536261	0.490445			0.522	0.08955	0.13282	0.86207			0.522
	0.523	0.117546	0.0131859	-0.163718	0.196453	-0.0962655	0.172272			0.523	0.0271854	0.705529	0.0640934	0.12391	0.0882745	0.12391			0.523	-0.0262675	0.0590027	0.0310035	0.0220947	0.0908199	0.0271854			0.523	-0.0262675	0.0590027	0.126455	0.234634	0.037367	0.295723			0.523	0.424265	0.509535	0.484081			0.523	0.087	0.14173	0.83407			0.523
	0.524	0.120092	0.0335489	-0.154809	0.206635	-0.108992	0.177363			0.524	0.0348216	0.708074	0.0462758	0.139182	0.0882745	0.0971834			0.524	-0.0224495	0.0590027	0.0310035	0.0246401	0.0984561	0.0360943			0.524	-0.0224495	0.0590027	0.141728	0.230816	0.0399123	0.295723			0.524	0.429355	0.517171	0.466263			0.524	0.09591	0.199	0.82134			0.524
	0.525	0.127728	0.0259127	-0.150991	0.195181	-0.0835386	0.186272			0.525	0.0322762	0.704256	0.0564573	0.122637	0.0640934	0.113728			0.525	-0.0135406	0.0526392	0.0335489	0.0271854	0.0984561	0.0259127			0.525	-0.0135406	0.0526392	0.144273	0.238452	0.0360943	0.266451			0.525	0.415356	0.480263	0.436991			0.525	0.09082	0.20536	0.82643			0.525
	0.526	0.127728	0.0335489	-0.161173	0.205362	-0.089902	0.160818			0.526	0.0462758	0.692802	0.0640934	0.121365	0.0691842	0.131546			0.526	-0.00717719	0.0691842	0.0131859	0.0297308	0.101001	0.0335489			0.526	-0.00717719	0.0691842	0.131546	0.24227	0.0539119	0.280451			0.526	0.40772	0.457355	0.434446			0.526	0.08064	0.24863	0.80734			0.526
	0.527	0.120092	0.0297308	-0.152264	0.207907	-0.0746297	0.172272			0.527	0.0437304	0.699166	0.0551846	0.131546	0.0793657	0.117546			0.527	-0.00844988	0.0500939	0.0195493	0.0259127	0.0920926	0.0335489			0.527	-0.00844988	0.0500939	0.132819	0.238452	0.0475485	0.272815			0.527	0.405174	0.453537	0.380993			0.527	0.07937	0.26136	0.8328			0.527
	0.528	0.132819	0.0259127	-0.14081	0.182454	-0.0835386	0.165909			0.528	0.0348216	0.673712	0.0704569	0.115001	0.0819111	0.118819			0.528	-0.00844988	0.061548	0.0284581	0.0246401	0.0882745	0.041185			0.528	-0.00844988	0.061548	0.135364	0.226998	0.0488212	0.277905			0.528	0.389902	0.406447	0.352994			0.528	0.087	0.30336	0.86334			0.528
	0.529	0.125183	0.0360943	-0.143355	0.202817	-0.0873566	0.172272			0.529	0.0399123	0.673712	0.05773	0.120092	0.0933653	0.117546			0.529	-0.00844988	0.0551846	0.0195493	0.0220947	0.0831838	0.0348216			0.529	-0.00844988	0.0551846	0.140455	0.229543	0.0500939	0.270269			0.529	0.380993	0.354267	0.332631			0.529	0.09846	0.29572	0.85825			0.529
	0.53	0.120092	0.0297308	-0.157355	0.206635	-0.0797205	0.177363			0.53	0.0450031	0.664803	0.061548	0.126455	0.0920926	0.125183			0.53	-0.0224495	0.0564573	0.020822	0.0195493	0.103547	0.0182766			0.53	-0.0224495	0.0564573	0.116274	0.240997	0.041185	0.285541			0.53	0.352994	0.34154	0.279178			0.53	0.09082	0.30972	0.9028			0.53
	0.531	0.112456	0.020822	-0.144628	0.181181	-0.089902	0.160818			0.531	0.0322762	0.662258	0.0488212	0.136637	0.0831838	0.108638			0.531	-0.0262675	0.0691842	0.020822	0.0195493	0.0882745	0.0399123			0.531	-0.0262675	0.0691842	0.131546	0.22827	0.037367	0.291905			0.531	0.351721	0.316086	0.252451			0.531	0.10864	0.28554	0.91298			0.531
	0.532	0.125183	0.0144585	-0.1459	0.181181	-0.0911747	0.160818			0.532	0.0437304	0.657167	0.0539119	0.140455	0.0691842	0.122637			0.532	-0.0224495	0.0526392	0.0144585	0.0182766	0.102274	0.0297308			0.532	-0.0224495	0.0526392	0.121365	0.230816	0.0450031	0.277905			0.532	0.323722	0.249906	0.247361			0.532	0.09464	0.27027	0.94861			0.532
	0.533	0.122637	0.0157312	-0.156082	0.191362	-0.073357	0.170999			0.533	0.0386396	0.659712	0.0730023	0.136637	0.101001	0.115001			0.533	-0.016086	0.0628207	0.0437304	0.0259127	0.0895472	0.0399123			0.533	-0.016086	0.0628207	0.10991	0.221907	0.0322762	0.288087			0.533	0.312268	0.215543	0.204089			0.533	0.08827	0.26263	0.99061			0.533
	0.534	0.118819	0.0246401	-0.149718	0.19009	-0.0937201	0.174817			0.534	0.0399123	0.657167	0.0513665	0.122637	0.106092	0.107365			0.534	-0.0199041	0.0437304	0.0233674	0.0259127	0.104819	0.0399123			0.534	-0.0199041	0.0437304	0.116274	0.232089	0.0488212	0.279178			0.534	0.279178	0.19009	0.181181			0.534	0.10227	0.21045	0.96898			0.534
	0.535	0.122637	0.0246401	-0.144628	0.201544	-0.073357	0.177363			0.535	0.0386396	0.648258	0.0628207	0.125183	0.0971834	0.108638			0.535	-0.0224495	0.0640934	0.0322762	0.0220947	0.0997288	0.037367			0.535	-0.0224495	0.0640934	0.0997288	0.226998	0.0386396	0.272815			0.535	0.254997	0.155727	0.155727			0.535	0.09082	0.20282	0.94734			0.535
	0.536	0.12391	0.0233674	-0.1459	0.19009	-0.0848113	0.159545			0.536	0.0297308	0.645713	0.0679115	0.126455	0.0882745	0.102274			0.536	-0.0237222	0.0755476	0.0119132	0.0182766	0.094638	0.0386396			0.536	-0.0237222	0.0755476	0.0895472	0.233361	0.0119132	0.290632			0.536	0.237179	0.116274	0.125183			0.536	0.087	0.17354	0.96389			0.536
	0.537	0.139182	0.0233674	-0.150991	0.187544	-0.0911747	0.183726			0.537	0.0424577	0.649531	0.0564573	0.129001	0.094638	0.101001			0.537	-0.0059045	0.05773	0.0195493	0.0360943	0.0933653	0.0284581			0.537	-0.0059045	0.05773	0.0882745	0.221907	0.0220947	0.282996			0.537	0.198998	0.094638	0.120092			0.537	0.08446	0.171	0.91425			0.537
	0.538	0.121365	0.0310035	-0.149718	0.196453	-0.0873566	0.160818			0.538	0.0271854	0.636804	0.0628207	0.117546	0.0984561	0.117546			0.538	-0.016086	0.0590027	0.0297308	0.00809509	0.0882745	0.0271854			0.538	-0.016086	0.0590027	0.0564573	0.221907	0.00173164	0.290632			0.538	0.153182	0.0500939	0.103547			0.538	0.07682	0.14809	0.89516			0.538
	0.539	0.126455	0.0271854	-0.131901	0.195181	-0.0682663	0.151909			0.539	0.0424577	0.650803	0.0539119	0.126455	0.0908199	0.117546			0.539	0.000458949	0.0462758	0.0310035	0.0246401	0.0971834	0.0475485			0.539	0.000458949	0.0462758	0.0551846	0.226998	0.00936778	0.249906			0.539	0.122637	0.0475485	0.0971834			0.539	0.09464	0.13918	0.83153			0.539
	0.54	0.126455	0.0259127	-0.153536	0.177363	-0.0886293	0.148091			0.54	0.0220947	0.634258	0.0628207	0.120092	0.106092	0.102274			0.54	-0.032631	0.0513665	0.0297308	0.0246401	0.108638	0.0488212			0.54	-0.032631	0.0513665	0.0450031	0.221907	0.0068224	0.276633			0.54	0.0908199	0.0119132	0.0666388			0.54	0.11246	0.13664	0.83662			0.54
	0.541	0.121365	0.0360943	-0.139537	0.183726	-0.0759024	0.174817			0.541	0.0297308	0.639349	0.0488212	0.120092	0.0971834	0.127728			0.541	-0.00463181	0.0755476	0.0246401	0.0310035	0.102274	0.0437304			0.541	-0.00463181	0.0755476	0.0399123	0.226998	-0.0199041	0.272815			0.541	0.0500939	-0.00844988	0.078093			0.541	0.09846	0.16973	0.79844			0.541
	0.542	0.12391	0.0271854	-0.149718	0.188817	-0.0669936	0.164636			0.542	0.0246401	0.627895	0.0513665	0.132819	0.10991	0.120092			0.542	-0.0237222	0.0653661	0.0360943	0.0360943	0.103547	0.0386396			0.542	-0.0237222	0.0653661	0.0437304	0.215543	-0.0313583	0.27536			0.542	0.0220947	-0.0211768	0.0844565			0.542	0.087	0.24736	0.78825			0.542
	0.543	0.130273	0.037367	-0.150991	0.182454	-0.0886293	0.16209			0.543	0.0131859	0.618986	0.061548	0.136637	0.078093	0.125183			0.543	-0.0059045	0.0691842	0.0119132	0.0233674	0.0908199	0.0322762			0.543	-0.0059045	0.0691842	0.0220947	0.214271	-0.0199041	0.257542			0.543	-0.00208643	-0.0453579	0.05773			0.543	0.08573	0.25627	0.79844			0.543
	0.544	0.117546	0.0170039	-0.163718	0.179908	-0.0809932	0.163363			0.544	0.0170039	0.621532	0.0475485	0.137909	0.0895472	0.139182			0.544	-0.016086	0.0691842	0.0259127	0.0220947	0.0793657	0.0475485			0.544	-0.016086	0.0691842	-0.00208643	0.218089	-0.0402671	0.252451			0.544	-0.0593575	-0.0631755	0.0450031			0.544	0.09973	0.269	0.8048			0.544
	0.545	0.131546	0.0271854	-0.135719	0.187544	-0.0937201	0.16209			0.545	0.0144585	0.636804	0.0360943	0.115001	0.0984561	0.127728			0.545	0.00173164	0.0653661	0.020822	0.0246401	0.108638	0.0488212			0.545	0.00173164	0.0653661	0.00936778	0.200271	-0.036449	0.27536			0.545	-0.100084	-0.069539	0.0488212			0.545	0.08955	0.29572	0.79716			0.545
	0.546	0.125183	0.0297308	-0.138264	0.173545	-0.0644482	0.167181			0.546	0.0170039	0.626622	0.0322762	0.135364	0.0857292	0.127728			0.546	-0.0109953	0.0602754	0.0220947	0.0271854	0.0920926	0.0462758			0.546	-0.0109953	0.0602754	0.0068224	0.210453	-0.0619029	0.262633			0.546	-0.120447	-0.0644482	0.0259127			0.546	0.073	0.311	0.83662			0.546
	0.547	0.130273	0.037367	-0.150991	0.198998	-0.0822659	0.153182			0.547	0.0144585	0.606259	0.0475485	0.125183	0.0933653	0.125183			0.547	-0.016086	0.0628207	0.0284581	0.0322762	0.107365	0.0462758			0.547	-0.016086	0.0628207	0.000458949	0.215543	-0.052994	0.26136			0.547	-0.143355	-0.0937201	0.0386396			0.547	0.10864	0.30463	0.89389			0.547
	0.548	0.135364	0.0310035	-0.135719	0.178636	-0.0784478	0.165909			0.548	0.00427702	0.617714	0.0360943	0.113728	0.0819111	0.135364			0.548	-0.0135406	0.0513665	0.0335489	0.0360943	0.074275	0.0322762			0.548	-0.0135406	0.0513665	-0.00208643	0.218089	-0.0542667	0.252451			0.548	-0.171354	-0.0886293	0.0348216			0.548	0.09082	0.3199	0.89516			0.548
	0.549	0.108638	0.0424577	-0.1459	0.169727	-0.0873566	0.170999			0.549	-0.00335912	0.617714	0.0360943	0.125183	0.0971834	0.12391			0.549	-0.0211768	0.0462758	0.0170039	0.0348216	0.0984561	0.0386396			0.549	-0.0211768	0.0462758	-0.0059045	0.202817	-0.0580848	0.24227			0.549	-0.208262	-0.105174	0.0068224			0.549	0.08827	0.30336	0.94607			0.549
	0.55	0.129001	0.0360943	-0.150991	0.182454	-0.0873566	0.157			0.55	-0.00463181	0.613895	0.0246401	0.127728	0.101001	0.150636			0.55	0.00300433	0.0704569	0.0271854	0.020822	0.0933653	0.0488212			0.55	0.00300433	0.0704569	-0.0237222	0.216816	-0.069539	0.239725			0.55	-0.22608	-0.101356	0.0271854			0.55	0.08827	0.23972	0.94607			0.55
	0.551	0.120092	0.0399123	-0.153536	0.163363	-0.0835386	0.153182			0.551	-0.0122679	0.616441	0.00936778	0.145546	0.0908199	0.139182			0.551	-0.0059045	0.0488212	0.0233674	0.0335489	0.0895472	0.0500939			0.551	-0.0059045	0.0488212	-0.0275402	0.200271	-0.0797205	0.257542			0.551	-0.252806	-0.0937201	0.0322762			0.551	0.09846	0.20154	0.94352			0.551
	0.552	0.136637	0.0310035	-0.144628	0.186272	-0.0949928	0.157			0.552	-0.016086	0.602441	0.00809509	0.117546	0.0882745	0.141728			0.552	-0.00208643	0.0730023	0.0310035	0.020822	0.094638	0.0437304			0.552	-0.00208643	0.0730023	-0.032631	0.196453	-0.0835386	0.24227			0.552	-0.262988	-0.120447	0.0170039			0.552	0.10864	0.16082	0.93207			0.552
	0.553	0.140455	0.0437304	-0.153536	0.169727	-0.0822659	0.139182			0.553	-0.0199041	0.610077	0.00427702	0.141728	0.107365	0.120092			0.553	-0.00463181	0.061548	0.0233674	0.0284581	0.0857292	0.0335489			0.553	-0.00463181	0.061548	-0.0479033	0.211725	-0.0759024	0.238452			0.553	-0.280805	-0.101356	0.00809509			0.553	0.09464	0.15318	0.93334			0.553
	0.554	0.139182	0.0310035	-0.144628	0.165909	-0.0873566	0.158273			0.554	-0.0211768	0.604987	-0.00844988	0.136637	0.0933653	0.136637			0.554	-0.0122679	0.05773	0.0220947	0.0195493	0.0908199	0.0462758			0.554	-0.0122679	0.05773	-0.052994	0.201544	-0.0975382	0.249906			0.554	-0.290987	-0.115356	-0.00463181			0.554	0.09209	0.14936	0.90789			0.554
	0.555	0.137909	0.0335489	-0.157355	0.174817	-0.0759024	0.16209			0.555	-0.0313583	0.604987	-0.00208643	0.131546	0.101001	0.130273			0.555	-0.00463181	0.05773	0.0220947	0.0322762	0.0882745	0.037367			0.555	-0.00463181	0.05773	-0.0708117	0.198998	-0.103902	0.257542			0.555	-0.279533	-0.108992	0.00427702			0.555	0.08446	0.16082	0.83153			0.555
	0.556	0.137909	0.0348216	-0.154809	0.178636	-0.0848113	0.139182			0.556	-0.032631	0.603714	-0.00208643	0.12391	0.0895472	0.125183			0.556	0.00173164	0.0437304	0.0182766	0.0348216	0.0844565	0.0386396			0.556	0.00173164	0.0437304	-0.086084	0.191362	-0.101356	0.244815			0.556	-0.296078	-0.110265	0.00173164			0.556	0.08955	0.15064	0.81625			0.556
	0.557	0.125183	0.037367	-0.1599	0.177363	-0.0848113	0.157			0.557	-0.0339037	0.59226	-0.00208643	0.130273	0.101001	0.137909			0.557	-0.000813741	0.0666388	0.0233674	0.0360943	0.094638	0.0297308			0.557	-0.000813741	0.0666388	-0.0848113	0.182454	-0.105174	0.268997			0.557	-0.313895	-0.119174	-0.0122679			0.557	0.08827	0.15955	0.81244			0.557
	0.558	0.125183	0.0271854	-0.152264	0.167181	-0.0886293	0.165909			0.558	-0.049176	0.602441	-0.0249948	0.121365	0.102274	0.136637			0.558	-0.00335912	0.0590027	0.0322762	0.0220947	0.0895472	0.0475485			0.558	-0.00335912	0.0590027	-0.110265	0.201544	-0.117901	0.24227			0.558	-0.318986	-0.133174	0.000458949			0.558	0.09718	0.19264	0.7908			0.558
	0.559	0.141728	0.0462758	-0.147173	0.174817	-0.0848113	0.155727			0.559	-0.049176	0.598623	-0.0440852	0.131546	0.103547	0.141728			0.559	-0.00335912	0.0717296	0.0233674	0.0233674	0.0959107	0.0386396			0.559	-0.00335912	0.0717296	-0.111538	0.195181	-0.139537	0.253724			0.559	-0.321532	-0.120447	-0.00208643			0.559	0.08446	0.23718	0.7768			0.559
	0.56	0.130273	0.037367	-0.147173	0.164636	-0.0580848	0.140455			0.56	-0.0555394	0.604987	-0.0504486	0.117546	0.0959107	0.134091			0.56	0.00300433	0.0679115	0.0182766	0.0195493	0.0895472	0.0284581			0.56	0.00300433	0.0679115	-0.116628	0.187544	-0.157355	0.247361			0.56	-0.339349	-0.136991	0.000458949			0.56	0.08064	0.27409	0.79334			0.56
	0.561	0.117546	0.0399123	-0.156082	0.179908	-0.0873566	0.141728			0.561	-0.0593575	0.599896	-0.0542667	0.121365	0.0679115	0.112456			0.561	0.0068224	0.0640934	0.0119132	0.0322762	0.074275	0.041185			0.561	0.0068224	0.0640934	-0.12681	0.188817	-0.1599	0.24227			0.561	-0.336804	-0.149718	-0.0237222			0.561	0.09846	0.29063	0.78571			0.561
	0.562	0.130273	0.0424577	-0.139537	0.169727	-0.0771751	0.151909			0.562	-0.0784478	0.583351	-0.0848113	0.120092	0.104819	0.120092			0.562	0.0157312	0.0653661	0.0360943	0.0233674	0.0819111	0.0513665			0.562	0.0157312	0.0653661	-0.131901	0.195181	-0.164991	0.253724			0.562	-0.364803	-0.131901	-0.0059045			0.562	0.08955	0.28427	0.80989			0.562
	0.563	0.130273	0.0399123	-0.166263	0.163363	-0.0835386	0.135364			0.563	-0.073357	0.588442	-0.0669936	0.122637	0.101001	0.120092			0.563	-0.0109953	0.0564573	0.0246401	0.0233674	0.0844565	0.0310035			0.563	-0.0109953	0.0564573	-0.134446	0.188817	-0.170081	0.235906			0.563	-0.385166	-0.131901	-0.0135406			0.563	0.07937	0.28681	0.85062			0.563
	0.564	0.130273	0.0488212	-0.161173	0.155727	-0.0809932	0.163363			0.564	-0.0797205	0.580805	-0.0988109	0.122637	0.0882745	0.094638			0.564	-0.00335912	0.0666388	0.0195493	0.0271854	0.0679115	0.0182766			0.564	-0.00335912	0.0666388	-0.139537	0.177363	-0.185354	0.232089			0.564	-0.41062	-0.147173	0.00936778			0.564	0.08064	0.28809	0.89516			0.564
	0.565	0.137909	0.0437304	-0.153536	0.169727	-0.0924474	0.135364			0.565	-0.0886293	0.588442	-0.0962655	0.120092	0.0882745	0.103547			0.565	-0.000813741	0.074275	0.0284581	0.0131859	0.0819111	0.0284581			0.565	-0.000813741	0.074275	-0.166263	0.184999	-0.185354	0.244815			0.565	-0.414438	-0.135719	-0.000813741			0.565	0.08827	0.26772	0.90789			0.565
	0.566	0.140455	0.0297308	-0.1599	0.164636	-0.0759024	0.146818			0.566	-0.0949928	0.593532	-0.105174	0.111183	0.0882745	0.120092			0.566	0.00936778	0.061548	0.0220947	0.0220947	0.0882745	0.0310035			0.566	0.00936778	0.061548	-0.154809	0.195181	-0.200626	0.232089			0.566	-0.424619	-0.116628	0.0157312			0.566	0.07937	0.25118	0.90407			0.566
	0.567	0.131546	0.0488212	-0.154809	0.16209	-0.0720844	0.149364			0.567	-0.110265	0.579533	-0.116628	0.108638	0.0959107	0.118819			0.567	0.00809509	0.0793657	0.0220947	0.0233674	0.094638	0.0424577			0.567	0.00809509	0.0793657	-0.149718	0.181181	-0.205717	0.22318			0.567	-0.446255	-0.121719	0.0157312			0.567	0.09337	0.22573	0.91425			0.567
	0.568	0.129001	0.0360943	-0.177718	0.154454	-0.0835386	0.131546			0.568	-0.115356	0.576987	-0.134446	0.101001	0.0857292	0.140455			0.568	0.00300433	0.0691842	0.0284581	0.0157312	0.0819111	0.0322762			0.568	0.00300433	0.0691842	-0.166263	0.184999	-0.229898	0.221907			0.568	-0.444982	-0.105174	0.0233674			0.568	0.09209	0.171	0.92952			0.568
	0.569	0.137909	0.0488212	-0.152264	0.169727	-0.0720844	0.135364			0.569	-0.11281	0.57826	-0.143355	0.115001	0.0882745	0.150636			0.569	0.0144585	0.0806384	0.0170039	0.0284581	0.0819111	0.0246401			0.569	0.0144585	0.0806384	-0.149718	0.181181	-0.237534	0.22827			0.569	-0.4628	-0.101356	0.0424577			0.569	0.07427	0.14173	0.92698			0.569
	0.57	0.130273	0.0348216	-0.166263	0.150636	-0.0848113	0.145546			0.57	-0.124265	0.575715	-0.157355	0.10991	0.0920926	0.121365			0.57	0.00809509	0.0628207	0.0220947	0.0195493	0.0793657	0.0348216			0.57	0.00809509	0.0628207	-0.144628	0.174817	-0.217171	0.221907			0.57	-0.469164	-0.0937201	0.041185			0.57	0.09464	0.11373	0.88752			0.57
	0.571	0.130273	0.0335489	-0.162445	0.153182	-0.0759024	0.145546			0.571	-0.12681	0.565533	-0.1739	0.111183	0.094638	0.122637			0.571	0.00300433	0.074275	0.0297308	0.0322762	0.0933653	0.0170039			0.571	0.00300433	0.074275	-0.154809	0.170999	-0.219716	0.24227			0.571	-0.458982	-0.0822659	0.05773			0.571	0.08573	0.14045	0.86462			0.571
	0.572	0.145546	0.0513665	-0.150991	0.139182	-0.073357	0.141728			0.572	-0.138264	0.55917	-0.180263	0.094638	0.0691842	0.139182			0.572	-0.0122679	0.0717296	0.0246401	0.0360943	0.0730023	0.037367			0.572	-0.0122679	0.0717296	-0.148446	0.160818	-0.224807	0.215543			0.572	-0.461527	-0.0835386	0.0539119			0.572	0.09209	0.13155	0.7908			0.572
	0.573	0.132819	0.041185	-0.156082	0.165909	-0.0809932	0.113728			0.573	-0.142082	0.562988	-0.177718	0.106092	0.0806384	0.126455			0.573	-0.00463181	0.0679115	0.020822	0.0144585	0.0806384	0.0284581			0.573	-0.00463181	0.0679115	-0.142082	0.17609	-0.217171	0.22318			0.573	-0.450073	-0.0784478	0.0793657			0.573	0.09209	0.13155	0.78062			0.573
	0.574	0.135364	0.0424577	-0.156082	0.16209	-0.0937201	0.117546			0.574	-0.133174	0.55917	-0.191717	0.10991	0.074275	0.121365			0.574	0.0157312	0.0730023	0.0131859	0.0170039	0.074275	0.0195493			0.574	0.0157312	0.0730023	-0.133174	0.172272	-0.24517	0.221907			0.574	-0.432256	-0.0402671	0.0844565			0.574	0.09082	0.15827	0.76662			0.574
	0.575	0.143	0.0462758	-0.164991	0.149364	-0.0848113	0.134091			0.575	-0.142082	0.568079	-0.187899	0.0997288	0.0831838	0.125183			0.575	-0.00844988	0.0870019	0.0131859	0.0131859	0.094638	0.0233674			0.575	-0.00844988	0.0870019	-0.139537	0.165909	-0.27826	0.202817			0.575	-0.444982	-0.0453579	0.0908199			0.575	0.08446	0.17609	0.72716			0.575
	0.576	0.145546	0.0297308	-0.149718	0.149364	-0.086084	0.139182			0.576	-0.154809	0.568079	-0.205717	0.0959107	0.0730023	0.135364			0.576	0.0119132	0.0793657	0.0220947	0.0182766	0.0870019	0.0424577			0.576	0.0119132	0.0793657	-0.14081	0.159545	-0.280805	0.204089			0.576	-0.415711	-0.0288129	0.094638			0.576	0.09846	0.199	0.77044			0.576
	0.577	0.131546	0.0310035	-0.163718	0.153182	-0.0886293	0.104819			0.577	-0.171354	0.557897	-0.214626	0.0908199	0.078093	0.120092			0.577	-0.00208643	0.094638	0.0195493	0.020822	0.0870019	0.0259127			0.577	-0.00208643	0.094638	-0.135719	0.150636	-0.254079	0.216816			0.577	-0.394075	-0.0135406	0.0933653			0.577	0.08191	0.227	0.75389			0.577
	0.578	0.127728	0.0437304	-0.147173	0.132819	-0.0835386	0.139182			0.578	-0.154809	0.551534	-0.213353	0.0908199	0.0666388	0.127728			0.578	0.0068224	0.0602754	0.0182766	0.0195493	0.0844565	0.0246401			0.578	0.0068224	0.0602754	-0.12681	0.167181	-0.252806	0.233361			0.578	-0.395348	-0.000813741	0.120092			0.578	0.07427	0.27281	0.77044			0.578
	0.579	0.137909	0.0475485	-0.161173	0.155727	-0.0848113	0.130273			0.579	-0.153536	0.55917	-0.220989	0.0819111	0.0679115	0.115001			0.579	-0.00335912	0.0730023	0.020822	0.0106405	0.0602754	0.0170039			0.579	-0.00335912	0.0730023	-0.134446	0.160818	-0.241352	0.218089			0.579	-0.372439	0.00300433	0.122637			0.579	0.09337	0.29954	0.78571			0.579
	0.58	0.135364	0.037367	-0.156082	0.151909	-0.0835386	0.12391			0.58	-0.1599	0.554079	-0.218444	0.0920926	0.0806384	0.094638			0.58	0.00554971	0.0844565	0.0170039	0.0233674	0.0819111	0.0220947			0.58	0.00554971	0.0844565	-0.134446	0.182454	-0.227353	0.210453			0.58	-0.348258	0.0360943	0.132819			0.58	0.08446	0.30972	0.83789			0.58
	0.581	0.134091	0.0310035	-0.161173	0.150636	-0.0835386	0.122637			0.581	-0.167536	0.538807	-0.238807	0.101001	0.074275	0.0908199			0.581	0.00809509	0.0755476	0.0297308	0.0335489	0.0857292	0.00936778			0.581	0.00809509	0.0755476	-0.105174	0.170999	-0.220989	0.205362			0.581	-0.340622	0.0348216	0.141728			0.581	0.09973	0.29954	0.86716			0.581
	0.582	0.135364	0.0450031	-0.154809	0.145546	-0.0797205	0.129001			0.582	-0.176445	0.538807	-0.241352	0.0806384	0.103547	0.0984561			0.582	-0.00463181	0.0768203	0.0157312	0.0284581	0.0793657	0.0284581			0.582	-0.00463181	0.0768203	-0.125537	0.182454	-0.238807	0.201544			0.582	-0.307532	0.0462758	0.163363			0.582	0.09082	0.27536	0.88116			0.582
	0.583	0.145546	0.0322762	-0.172627	0.149364	-0.0937201	0.113728			0.583	-0.17899	0.541352	-0.229898	0.0819111	0.05773	0.0908199			0.583	0.000458949	0.0857292	0.00936778	0.0195493	0.074275	0.0271854			0.583	0.000458949	0.0857292	-0.114083	0.155727	-0.22608	0.211725			0.583	-0.310077	0.05773	0.165909			0.583	0.07682	0.23591	0.91552			0.583
	0.584	0.140455	0.0360943	-0.167536	0.155727	-0.0835386	0.129001			0.584	-0.166263	0.532443	-0.241352	0.094638	0.0564573	0.0959107			0.584	-0.00208643	0.0730023	0.0195493	0.0170039	0.0933653	0.0195493			0.584	-0.00208643	0.0730023	-0.130628	0.154454	-0.227353	0.195181			0.584	-0.288442	0.0730023	0.167181			0.584	0.07937	0.20791	0.92189			0.584
	0.585	0.135364	0.0437304	-0.156082	0.134091	-0.101356	0.130273			0.585	-0.166263	0.537534	-0.246443	0.0691842	0.0768203	0.0933653			0.585	-0.00335912	0.0882745	0.0170039	0.020822	0.0831838	0.020822			0.585	-0.00335912	0.0882745	-0.106447	0.172272	-0.218444	0.205362			0.585	-0.256624	0.0882745	0.178636			0.585	0.09464	0.17864	0.88752			0.585
	0.586	0.137909	0.0348216	-0.156082	0.151909	-0.086084	0.111183			0.586	-0.177718	0.537534	-0.254079	0.0679115	0.0539119	0.0806384			0.586	-0.00208643	0.0882745	0.00936778	0.0182766	0.0730023	0.0182766			0.586	-0.00208643	0.0882745	-0.105174	0.16209	-0.215898	0.195181			0.586	-0.241352	0.094638	0.186272			0.586	0.08446	0.17354	0.85698			0.586
	0.587	0.140455	0.041185	-0.162445	0.149364	-0.0835386	0.126455			0.587	-0.180263	0.531171	-0.238807	0.0730023	0.0679115	0.0755476			0.587	-0.0109953	0.0717296	0.037367	0.0170039	0.0844565	0.0157312			0.587	-0.0109953	0.0717296	-0.0759024	0.146818	-0.209535	0.20918			0.587	-0.215898	0.106092	0.193908			0.587	0.08827	0.129	0.87861			0.587
	0.588	0.139182	0.0348216	-0.171354	0.151909	-0.105174	0.107365			0.588	-0.187899	0.534989	-0.241352	0.0717296	0.0704569	0.0971834			0.588	0.00300433	0.094638	0.0182766	0.0335489	0.0793657	0.00554971			0.588	0.00300433	0.094638	-0.0937201	0.160818	-0.194263	0.198998			0.588	-0.198081	0.117546	0.210453			0.588	0.07809	0.12646	0.82643			0.588
	0.589	0.126455	0.0335489	-0.154809	0.139182	-0.10772	0.117546			0.589	-0.186626	0.522262	-0.243897	0.0857292	0.0793657	0.0691842			0.589	-0.00844988	0.0882745	0.00936778	0.0068224	0.078093	0.0310035			0.589	-0.00844988	0.0882745	-0.0822659	0.151909	-0.215898	0.178636			0.589	-0.185354	0.135364	0.206635			0.589	0.08446	0.13664	0.80989			0.589
	0.59	0.134091	0.0437304	-0.166263	0.145546	-0.0937201	0.125183			0.59	-0.171354	0.532443	-0.257897	0.0679115	0.0691842	0.0959107			0.59	-0.00208643	0.074275	0.0322762	0.0106405	0.0806384	0.0310035			0.59	-0.00208643	0.074275	-0.0784478	0.17609	-0.194263	0.182454			0.59	-0.157355	0.143	0.226998			0.59	0.08827	0.15064	0.76407			0.59
	0.591	0.145546	0.0475485	-0.17899	0.151909	-0.116628	0.117546			0.591	-0.172627	0.515898	-0.24517	0.0539119	0.0602754	0.0679115			0.591	-0.00844988	0.0920926	0.0170039	0.0195493	0.0653661	0.020822			0.591	-0.00844988	0.0920926	-0.0911747	0.151909	-0.19299	0.19009			0.591	-0.14081	0.141728	0.229543			0.591	0.09464	0.18373	0.73098			0.591
	0.592	0.148091	0.0386396	-0.161173	0.144273	-0.0937201	0.108638			0.592	-0.180263	0.51208	-0.248988	0.0628207	0.061548	0.078093			0.592	-0.0173587	0.0819111	0.020822	0.0157312	0.0844565	0.00936778			0.592	-0.0173587	0.0819111	-0.0644482	0.155727	-0.187899	0.192635			0.592	-0.130628	0.149364	0.234634			0.592	0.09209	0.227	0.73226			0.592
	0.593	0.130273	0.0322762	-0.175172	0.125183	-0.100084	0.112456			0.593	-0.177718	0.510807	-0.243897	0.0628207	0.0500939	0.0704569			0.593	-0.0122679	0.0704569	0.0106405	0.0195493	0.0806384	0.0220947			0.593	-0.0122679	0.0704569	-0.0580848	0.159545	-0.17899	0.183726			0.593	-0.105174	0.186272	0.247361			0.593	0.08191	0.26645	0.74626			0.593
	0.594	0.144273	0.0424577	-0.1739	0.149364	-0.101356	0.118819			0.594	-0.162445	0.508262	-0.242625	0.0691842	0.0653661	0.0640934			0.594	-0.00972257	0.0831838	0.0284581	0.00300433	0.0717296	0.0131859			0.594	-0.00972257	0.0831838	-0.0479033	0.158273	-0.172627	0.192635			0.594	-0.0708117	0.184999	0.246088			0.594	0.08064	0.26263	0.75898			0.594
	0.595	0.141728	0.0348216	-0.175172	0.141728	-0.0949928	0.121365			0.595	-0.171354	0.510807	-0.246443	0.0488212	0.0539119	0.0730023			0.595	-0.0109953	0.0844565	0.0195493	0.0233674	0.0793657	0.0195493			0.595	-0.0109953	0.0844565	-0.0517213	0.181181	-0.167536	0.184999			0.595	-0.0669936	0.184999	0.249906			0.595	0.08955	0.28554	0.78825			0.595
	0.596	0.135364	0.0310035	-0.166263	0.131546	-0.103902	0.111183			0.596	-0.167536	0.515898	-0.240079	0.0717296	0.0526392	0.0691842			0.596	-0.0122679	0.078093	0.0284581	0.020822	0.0806384	0.0284581			0.596	-0.0122679	0.078093	-0.0517213	0.158273	-0.163718	0.186272			0.596	-0.032631	0.195181	0.257542			0.596	0.09973	0.29063	0.80353			0.596
	0.597	0.132819	0.037367	-0.170081	0.143	-0.11281	0.120092			0.597	-0.170081	0.486626	-0.236261	0.0602754	0.0539119	0.061548			0.597	-0.0199041	0.078093	-0.00463181	0.0119132	0.0793657	0.0157312			0.597	-0.0199041	0.078093	-0.032631	0.17609	-0.175172	0.179908			0.597	-0.0135406	0.216816	0.272815			0.597	0.073	0.297	0.81116			0.597
	0.598	0.134091	0.0284581	-0.171354	0.120092	-0.105174	0.108638			0.598	-0.172627	0.500626	-0.224807	0.0691842	0.0526392	0.0730023			0.598	-0.0173587	0.0895472	0.0182766	0.0220947	0.0882745	0.0144585			0.598	-0.0173587	0.0895472	-0.0440852	0.144273	-0.162445	0.173545			0.598	-0.0122679	0.198998	0.286814			0.598	0.08827	0.3059	0.86843			0.598
	0.599	0.126455	0.0360943	-0.175172	0.130273	-0.102629	0.106092			0.599	-0.156082	0.491717	-0.238807	0.0640934	0.0488212	0.0691842			0.599	-0.0109953	0.0844565	0.0233674	0.00809509	0.0768203	0.0157312			0.599	-0.0109953	0.0844565	-0.0402671	0.165909	-0.148446	0.187544			0.599	-0.000813741	0.210453	0.263906			0.599	0.08827	0.28936	0.85571			0.599
	0.6	0.134091	0.0335489	-0.182808	0.126455	-0.11281	0.111183			0.6	-0.152264	0.498081	-0.22608	0.0602754	0.0462758	0.0437304			0.6	-0.00972257	0.0755476	0.0335489	0.0170039	0.0768203	0.0068224			0.6	-0.00972257	0.0755476	-0.0249948	0.160818	-0.133174	0.184999			0.6	0.0360943	0.211725	0.280451			0.6	0.06918	0.241	0.88752			0.6
	0.601	0.145546	0.0335489	-0.185354	0.130273	-0.108992	0.120092			0.601	-0.158627	0.485354	-0.231171	0.0526392	0.0437304	0.0462758			0.601	-0.0173587	0.0908199	0.0157312	0.0233674	0.0666388	0.0271854			0.601	-0.0173587	0.0908199	-0.0109953	0.155727	-0.134446	0.182454			0.601	0.0666388	0.233361	0.289359			0.601	0.087	0.18373	0.90407			0.601
	0.602	0.137909	0.0284581	-0.175172	0.131546	-0.124265	0.125183			0.602	-0.152264	0.480263	-0.213353	0.0526392	0.0628207	0.0551846			0.602	-0.0173587	0.0870019	0.0182766	0.0119132	0.0679115	0.0259127			0.602	-0.0173587	0.0870019	-0.0109953	0.160818	-0.135719	0.177363			0.602	0.0513665	0.252451	0.265178			0.602	0.09464	0.16082	0.90407			0.602
	0.603	0.139182	0.0322762	-0.168809	0.140455	-0.117901	0.111183			0.603	-0.147173	0.484081	-0.209535	0.061548	0.0437304	0.0475485			0.603	-0.0173587	0.0793657	0.0182766	-0.000813741	0.0819111	0.0284581			0.603	-0.0173587	0.0793657	0.00173164	0.160818	-0.124265	0.184999			0.603	0.0793657	0.260088	0.284269			0.603	0.08446	0.13791	0.86843			0.603
	0.604	0.141728	0.0284581	-0.177718	0.129001	-0.106447	0.108638			0.604	-0.130628	0.476445	-0.204444	0.061548	0.0462758	0.0462758			0.604	0.00300433	0.0793657	0.0399123	0.0310035	0.0768203	0.0131859			0.604	0.00300433	0.0793657	0.00809509	0.150636	-0.116628	0.183726			0.604	0.117546	0.257542	0.270269			0.604	0.10227	0.16082	0.8468			0.604
	0.605	0.139182	0.0233674	-0.194263	0.137909	-0.124265	0.104819			0.605	-0.139537	0.47899	-0.205717	0.0590027	0.0628207	0.0526392			0.605	-0.00335912	0.094638	0.0220947	0.0271854	0.0730023	0.0220947			0.605	-0.00335912	0.094638	0.0106405	0.167181	-0.125537	0.198998			0.605	0.115001	0.271542	0.272815			0.605	0.07682	0.13027	0.7908			0.605
	0.606	0.131546	0.0488212	-0.152264	0.135364	-0.124265	0.12391			0.606	-0.135719	0.473899	-0.203171	0.05773	0.0488212	0.0500939			0.606	-0.00844988	0.0857292	0.0106405	0.0182766	0.061548	0.00936778			0.606	-0.00844988	0.0857292	-0.00208643	0.168454	-0.11281	0.181181			0.606	0.144273	0.272815	0.282996			0.606	0.101	0.14936	0.74371			0.606
	0.607	0.127728	0.0310035	-0.184081	0.113728	-0.119174	0.118819			0.607	-0.124265	0.47899	-0.196808	0.0653661	0.0640934	0.0488212			0.607	0.0131859	0.0895472	0.0119132	0.0106405	0.0704569	0.00554971			0.607	0.0131859	0.0895472	0.0182766	0.160818	-0.0988109	0.174817			0.607	0.154454	0.285541	0.289359			0.607	0.09337	0.13536	0.77044			0.607
	0.608	0.146818	0.0271854	-0.172627	0.134091	-0.117901	0.0959107			0.608	-0.124265	0.480263	-0.19299	0.0551846	0.061548	0.0564573			0.608	-0.00208643	0.0831838	0.0119132	0.00554971	0.0870019	0.00936778			0.608	-0.00208643	0.0831838	0.0322762	0.17609	-0.0886293	0.17609			0.608	0.16209	0.281723	0.293178			0.608	0.08573	0.15827	0.73098			0.608
	0.609	0.132819	0.0271854	-0.184081	0.118819	-0.125537	0.0831838			0.609	-0.11281	0.471354	-0.185354	0.05773	0.0348216	0.037367			0.609	-0.0122679	0.0971834	0.0182766	0.0195493	0.074275	0.0182766			0.609	-0.0122679	0.0971834	0.0170039	0.164636	-0.0962655	0.174817			0.609	0.165909	0.296996	0.279178			0.609	0.073	0.20918	0.72971			0.609
	0.61	0.139182	0.0157312	-0.168809	0.117546	-0.116628	0.101001			0.61	-0.10772	0.468809	-0.191717	0.0500939	0.0551846	0.041185			0.61	-0.0186314	0.0920926	0.0182766	0.0195493	0.0806384	0.0131859			0.61	-0.0186314	0.0920926	0.0220947	0.155727	-0.0911747	0.17609			0.61	0.214271	0.285541	0.267724			0.61	0.101	0.26391	0.71826			0.61
	0.611	0.135364	0.0348216	-0.186626	0.129001	-0.142082	0.102274			0.611	-0.102629	0.456082	-0.180263	0.0590027	0.0539119	0.0360943			0.611	-0.0237222	0.094638	0.0106405	0.00300433	0.0768203	0.00936778			0.611	-0.0237222	0.094638	0.0475485	0.157	-0.100084	0.163363			0.611	0.215543	0.285541	0.27536			0.611	0.09464	0.28809	0.73989			0.611
	0.612	0.130273	0.037367	-0.189172	0.125183	-0.12681	0.0882745			0.612	-0.102629	0.450991	-0.167536	0.0539119	0.061548	0.0539119			0.612	-0.00463181	0.0755476	0.0233674	0.0144585	0.0602754	-0.00335912			0.612	-0.00463181	0.0755476	0.0348216	0.157	-0.073357	0.144273			0.612	0.230816	0.284269	0.277905			0.612	0.10736	0.28809	0.75898			0.612
	0.613	0.139182	0.0297308	-0.182808	0.120092	-0.144628	0.102274			0.613	-0.0949928	0.450991	-0.154809	0.0475485	0.0564573	0.0348216			0.613	-0.00844988	0.0793657	0.0233674	0.0284581	0.0857292	-0.0059045			0.613	-0.00844988	0.0793657	0.041185	0.168454	-0.0746297	0.168454			0.613	0.233361	0.293178	0.282996			0.613	0.09718	0.28554	0.79334			0.613
	0.614	0.136637	0.0220947	-0.182808	0.0984561	-0.12681	0.10991			0.614	-0.0886293	0.453537	-0.154809	0.0526392	0.0488212	0.0437304			0.614	-0.0109953	0.0984561	0.0220947	0.0131859	0.0831838	0.020822			0.614	-0.0109953	0.0984561	0.0500939	0.168454	-0.0682663	0.165909			0.614	0.238452	0.288087	0.272815			0.614	0.09973	0.26772	0.84043			0.614
	0.615	0.143	0.0259127	-0.194263	0.112456	-0.135719	0.094638			0.615	-0.0835386	0.447173	-0.163718	0.041185	0.0590027	0.0348216			0.615	-0.0135406	0.0895472	0.00809509	0.0182766	0.0908199	0.0068224			0.615	-0.0135406	0.0895472	0.0666388	0.149364	-0.0517213	0.167181			0.615	0.254997	0.293178	0.284269			0.615	0.09464	0.25882	0.85316			0.615
	0.616	0.141728	0.0195493	-0.185354	0.122637	-0.133174	0.0971834			0.616	-0.086084	0.444628	-0.148446	0.0628207	0.0488212	0.0450031			0.616	-0.00844988	0.0844565	0.0246401	0.00809509	0.0857292	-0.00208643			0.616	-0.00844988	0.0844565	0.0488212	0.16209	-0.0644482	0.159545			0.616	0.272815	0.304632	0.282996			0.616	0.08573	0.24991	0.84807			0.616
	0.617	0.129001	0.041185	-0.195535	0.107365	-0.12681	0.0870019			0.617	-0.0797205	0.4459	-0.148446	0.0513665	0.0628207	0.0590027			0.617	-0.016086	0.0933653	0.00809509	0.0119132	0.0806384	-0.00717719			0.617	-0.016086	0.0933653	0.0526392	0.163363	-0.052994	0.151909			0.617	0.291905	0.304632	0.271542			0.617	0.08191	0.21045	0.85825			0.617
	0.618	0.122637	0.0322762	-0.19299	0.12391	-0.148446	0.0997288			0.618	-0.0708117	0.450991	-0.14081	0.0500939	0.0462758	0.0450031			0.618	-0.0211768	0.0882745	0.0233674	0.020822	0.0628207	0.0068224			0.618	-0.0211768	0.0882745	0.0526392	0.163363	-0.0313583	0.170999			0.618	0.285541	0.312268	0.266451			0.618	0.09591	0.17482	0.84171			0.618
	0.619	0.125183	0.0488212	-0.195535	0.120092	-0.12681	0.0971834			0.619	-0.0619029	0.434446	-0.135719	0.0475485	0.0590027	0.0526392			0.619	-0.0173587	0.0882745	0.0068224	0.0119132	0.0602754	0.00936778			0.619	-0.0173587	0.0882745	0.0450031	0.165909	-0.0415398	0.168454			0.619	0.299541	0.30845	0.289359			0.619	0.09209	0.13791	0.85062			0.619
	0.62	0.127728	0.0360943	-0.196808	0.101001	-0.136991	0.0997288			0.62	-0.069539	0.42681	-0.133174	0.0475485	0.0513665	0.041185			0.62	-0.00844988	0.101001	0.0157312	0.0068224	0.0755476	-0.00335912			0.62	-0.00844988	0.101001	0.0564573	0.16209	-0.052994	0.165909			0.62	0.310995	0.313541	0.285541			0.62	0.09846	0.09846	0.85825			0.62
	0.621	0.134091	0.0233674	-0.181536	0.12391	-0.138264	0.0844565			0.621	-0.0631755	0.433173	-0.124265	0.0488212	0.05773	0.0475485			0.621	-0.0173587	0.0908199	0.0170039	0.0170039	0.0679115	0.00809509			0.621	-0.0173587	0.0908199	0.0564573	0.157	-0.0339037	0.155727			0.621	0.337722	0.307177	0.267724			0.621	0.101	0.12009	0.80734			0.621
	0.622	0.129001	0.020822	-0.180263	0.0997288	-0.122992	0.103547			0.622	-0.0555394	0.429355	-0.125537	0.0462758	0.0526392	0.0399123			0.622	-0.0173587	0.0933653	0.0195493	0.0119132	0.0602754	-0.0059045			0.622	-0.0173587	0.0933653	0.0564573	0.158273	-0.0249948	0.164636			0.622	0.322449	0.318631	0.262633			0.622	0.08955	0.14427	0.74626			0.622
	0.623	0.115001	0.0297308	-0.191717	0.0933653	-0.139537	0.0844565			0.623	-0.0555394	0.42681	-0.0949928	0.0488212	0.0640934	0.0640934			0.623	-0.0186314	0.0959107	0.00554971	0.0131859	0.0526392	0.00300433			0.623	-0.0186314	0.0959107	0.0310035	0.168454	-0.0211768	0.155727			0.623	0.351721	0.309723	0.271542			0.623	0.09846	0.13918	0.74498			0.623
	0.624	0.127728	0.0144585	-0.196808	0.106092	-0.128083	0.0984561			0.624	-0.0440852	0.420447	-0.114083	0.0424577	0.037367	0.05773			0.624	-0.0313583	0.0908199	0.0106405	0.00300433	0.0590027	-0.0173587			0.624	-0.0313583	0.0908199	0.0386396	0.158273	-0.0389944	0.163363			0.624	0.335176	0.313541	0.263906			0.624	0.09973	0.15827	0.7068			0.624
	0.625	0.134091	0.0322762	-0.195535	0.112456	-0.144628	0.0971834			0.625	-0.0517213	0.41281	-0.108992	0.0602754	0.0437304	0.0539119			0.625	-0.0122679	0.0882745	0.0068224	-0.000813741	0.0640934	0.00173164			0.625	-0.0122679	0.0882745	0.0488212	0.163363	-0.0339037	0.168454			0.625	0.359357	0.322449	0.271542			0.625	0.08318	0.18245	0.6928			0.625
	0.626	0.125183	0.0220947	-0.187899	0.111183	-0.1459	0.0882745			0.626	-0.0377217	0.419174	-0.0962655	0.0526392	0.0539119	0.0424577			0.626	-0.0122679	0.0933653	0.0284581	0.0068224	0.0513665	0.0182766			0.626	-0.0122679	0.0933653	0.0386396	0.16209	-0.0186314	0.154454			0.626	0.370812	0.333904	0.265178			0.626	0.09337	0.23718	0.70807			0.626
	0.627	0.122637	0.0386396	-0.204444	0.0971834	-0.149718	0.0870019			0.627	-0.036449	0.419174	-0.089902	0.0488212	0.0602754	0.0399123			0.627	-0.00208643	0.0997288	0.0144585	0.0131859	0.061548	-0.000813741			0.627	-0.00208643	0.0997288	0.0297308	0.143	-0.0109953	0.158273			0.627	0.373357	0.296996	0.25627			0.627	0.09337	0.22954	0.72462			0.627
	0.628	0.120092	0.0271854	-0.189172	0.101001	-0.134446	0.0730023			0.628	-0.0339037	0.41281	-0.0886293	0.0335489	0.0628207	0.0475485			0.628	-0.0199041	0.0882745	0.0297308	0.0157312	0.0730023	0.00936778			0.628	-0.0199041	0.0882745	0.020822	0.159545	-0.00844988	0.167181			0.628	0.382266	0.309723	0.257542			0.628	0.09209	0.24736	0.7208			0.628
	0.629	0.134091	0.0360943	-0.190444	0.0933653	-0.14081	0.0793657			0.629	-0.0275402	0.411538	-0.069539	0.041185	0.0590027	0.0259127			0.629	-0.0275402	0.102274	0.00554971	0.00173164	0.0551846	0.00427702			0.629	-0.0275402	0.102274	0.0399123	0.153182	0.000458949	0.160818			0.629	0.372084	0.32754	0.251179			0.629	0.09082	0.28809	0.74498			0.629
	0.63	0.111183	0.0360943	-0.19299	0.107365	-0.144628	0.0793657			0.63	-0.0275402	0.414083	-0.0644482	0.0488212	0.0500939	0.0271854			0.63	-0.0237222	0.103547	0.0220947	0.000458949	0.0564573	0.00427702			0.63	-0.0237222	0.103547	0.0322762	0.139182	-0.00335912	0.145546			0.63	0.394993	0.317359	0.238452			0.63	0.08446	0.28045	0.78444			0.63
	0.631	0.113728	0.0297308	-0.198081	0.107365	-0.147173	0.0666388			0.631	-0.0173587	0.411538	-0.0657209	0.041185	0.0590027	0.037367			0.631	-0.016086	0.0971834	0.0131859	0.00936778	0.05773	-0.00335912			0.631	-0.016086	0.0971834	0.0233674	0.163363	-0.0148133	0.149364			0.631	0.384811	0.314813	0.26136			0.631	0.10736	0.26263	0.80225			0.631
	0.632	0.118819	0.041185	-0.200626	0.0933653	-0.143355	0.0819111			0.632	-0.0288129	0.40772	-0.0415398	0.0386396	0.0704569	0.0386396			0.632	-0.00717719	0.0933653	0.00173164	0.00300433	0.0564573	0.00173164			0.632	-0.00717719	0.0933653	0.037367	0.146818	0.00300433	0.153182			0.632	0.396265	0.333904	0.251179			0.632	0.09209	0.24736	0.82643			0.632
	0.633	0.12391	0.0297308	-0.17899	0.103547	-0.153536	0.0844565			0.633	-0.0148133	0.415356	-0.0606302	0.0564573	0.0628207	0.0551846			0.633	-0.00844988	0.0997288	0.0119132	-0.00335912	0.061548	-0.0059045			0.633	-0.00844988	0.0997288	0.0335489	0.16209	0.00936778	0.157			0.633	0.386084	0.319904	0.252451			0.633	0.09718	0.22191	0.85825			0.633
	0.634	0.132819	0.0322762	-0.190444	0.0933653	-0.152264	0.0704569			0.634	-0.0237222	0.400083	-0.0466306	0.0310035	0.0793657	0.0259127			0.634	-0.00717719	0.0882745	0.0157312	-0.00463181	0.0819111	0.0195493			0.634	-0.00717719	0.0882745	0.0259127	0.140455	0.00936778	0.158273			0.634	0.419174	0.347903	0.265178			0.634	0.09337	0.171	0.85571			0.634
	0.635	0.120092	0.0271854	-0.19299	0.0971834	-0.138264	0.0755476			0.635	-0.0059045	0.410265	-0.0275402	0.0462758	0.0691842	0.0335489			0.635	-0.00844988	0.0971834	0.0182766	-0.00717719	0.0564573	0.0131859			0.635	-0.00844988	0.0971834	0.0360943	0.146818	-0.00208643	0.135364			0.635	0.419174	0.342813	0.232089			0.635	0.10736	0.15955	0.84298			0.635
	0.636	0.126455	0.0437304	-0.206989	0.0959107	-0.1459	0.078093			0.636	-0.000813741	0.401356	-0.0402671	0.0500939	0.0666388	0.0335489			0.636	-0.0173587	0.0984561	0.00936778	0.0182766	0.0730023	-0.00208643			0.636	-0.0173587	0.0984561	0.037367	0.149364	0.0144585	0.140455			0.636	0.420447	0.356812	0.266451			0.636	0.09337	0.14555	0.83789			0.636
	0.637	0.116274	0.0348216	-0.187899	0.0882745	-0.147173	0.0870019			0.637	-0.00208643	0.392447	-0.00717719	0.0526392	0.0717296	0.0310035			0.637	-0.0148133	0.0984561	0.0195493	0.00427702	0.0666388	0.00936778			0.637	-0.0148133	0.0984561	0.0437304	0.153182	0.0170039	0.139182			0.637	0.436991	0.351721	0.267724			0.637	0.08446	0.13155	0.80225			0.637
	0.638	0.129001	0.0271854	-0.191717	0.0895472	-0.124265	0.078093			0.638	0.00809509	0.401356	-0.0237222	0.0500939	0.074275	0.0195493			0.638	-0.00717719	0.0997288	0.0119132	0.00300433	0.0551846	0.0220947			0.638	-0.00717719	0.0997288	0.061548	0.148091	0.0297308	0.153182			0.638	0.454809	0.365721	0.26136			0.638	0.09337	0.09846	0.78444			0.638
	0.639	0.12391	0.0246401	-0.19299	0.102274	-0.144628	0.0793657			0.639	0.00554971	0.403902	0.00427702	0.0450031	0.0793657	0.0322762			0.639	-0.000813741	0.078093	0.00809509	-0.0059045	0.0653661	0.00173164			0.639	-0.000813741	0.078093	0.0513665	0.148091	0.0399123	0.148091			0.639	0.456082	0.383539	0.265178			0.639	0.09718	0.11755	0.77171			0.639
	0.64	0.125183	0.0310035	-0.185354	0.0908199	-0.144628	0.0793657			0.64	0.0233674	0.398811	0.00554971	0.0590027	0.0628207	0.0259127			0.64	-0.00208643	0.0984561	0.00936778	0.00173164	0.0437304	0.0259127			0.64	-0.00208643	0.0984561	0.0437304	0.148091	0.0322762	0.141728			0.64	0.448446	0.379721	0.279178			0.64	0.09209	0.14809	0.7348			0.64
	0.641	0.116274	0.041185	-0.200626	0.0959107	-0.157355	0.0704569			0.641	0.0271854	0.383539	0.0157312	0.0462758	0.0806384	0.0475485			0.641	-0.0148133	0.0870019	0.020822	-0.0122679	0.0640934	0.0220947			0.641	-0.0148133	0.0870019	0.061548	0.141728	0.037367	0.143			0.641	0.466263	0.389902	0.282996			0.641	0.08955	0.14427	0.70171			0.641
	0.642	0.111183	0.0437304	-0.176445	0.112456	-0.153536	0.0755476			0.642	0.0182766	0.400083	0.00300433	0.0602754	0.0844565	0.0271854			0.642	-0.00844988	0.0959107	0.0119132	0.0157312	0.041185	0.000458949			0.642	-0.00844988	0.0959107	0.0666388	0.149364	0.0539119	0.154454			0.642	0.499353	0.402629	0.288087			0.642	0.09718	0.20663	0.70044			0.642
	0.643	0.10991	0.0271854	-0.198081	0.078093	-0.125537	0.0602754			0.643	0.0297308	0.392447	0.0220947	0.0539119	0.0793657	0.0488212			0.643	-0.0173587	0.0984561	-0.00844988	0.00554971	0.0437304	0.020822			0.643	-0.0173587	0.0984561	0.0640934	0.16209	0.061548	0.158273			0.643	0.505717	0.417901	0.313541			0.643	0.08955	0.24863	0.68517			0.643
	0.644	0.117546	0.0335489	-0.180263	0.0882745	-0.162445	0.0691842			0.644	0.0284581	0.389902	0.0399123	0.0500939	0.0666388	0.0360943			0.644	-0.0211768	0.0971834	0.0131859	-0.00463181	0.0551846	0.00173164			0.644	-0.0211768	0.0971834	0.05773	0.132819	0.0590027	0.148091			0.644	0.527353	0.428083	0.317359			0.644	0.09591	0.24354	0.72589			0.644
	0.645	0.113728	0.0322762	-0.184081	0.0933653	-0.139537	0.0730023			0.645	0.0450031	0.394993	0.0348216	0.05773	0.0793657	0.0335489			0.645	-0.016086	0.0895472	0.00809509	0.00554971	0.0450031	0.0106405			0.645	-0.016086	0.0895472	0.0590027	0.148091	0.0526392	0.12391			0.645	0.533716	0.452264	0.326267			0.645	0.08318	0.27281	0.72716			0.645
	0.646	0.111183	0.0335489	-0.194263	0.0920926	-0.149718	0.061548			0.646	0.0360943	0.396265	0.0386396	0.0500939	0.0806384	0.0526392			0.646	-0.0059045	0.0844565	0.0195493	0.0131859	0.0526392	0.020822			0.646	-0.0059045	0.0844565	0.0666388	0.140455	0.078093	0.116274			0.646	0.528625	0.442082	0.328813			0.646	0.09337	0.269	0.75389			0.646
	0.647	0.113728	0.0335489	-0.176445	0.107365	-0.143355	0.0755476			0.647	0.0437304	0.39372	0.0500939	0.0475485	0.0857292	0.0310035			0.647	0.00427702	0.094638	0.0157312	0.0170039	0.0526392	0.0360943			0.647	0.00427702	0.094638	0.0717296	0.139182	0.061548	0.135364			0.647	0.552806	0.463718	0.333904			0.647	0.09082	0.28554	0.7908			0.647
	0.648	0.126455	0.0271854	-0.184081	0.0959107	-0.129355	0.078093			0.648	0.0488212	0.394993	0.0602754	0.061548	0.074275	0.0462758			0.648	-0.00208643	0.0959107	0.020822	0.00936778	0.0462758	0.0284581			0.648	-0.00208643	0.0959107	0.074275	0.144273	0.078093	0.131546			0.648	0.560442	0.470081	0.356812			0.648	0.08573	0.28554	0.81498			0.648
	0.649	0.103547	0.0246401	-0.175172	0.0882745	-0.1459	0.0730023			0.649	0.061548	0.389902	0.0704569	0.0590027	0.103547	0.0233674			0.649	0.000458949	0.0882745	0.00300433	0.0119132	0.041185	0.020822			0.649	0.000458949	0.0882745	0.0730023	0.143	0.0691842	0.135364			0.649	0.573169	0.484081	0.356812			0.649	0.10864	0.26772	0.83153			0.649
	0.65	0.102274	0.0310035	-0.189172	0.0895472	-0.148446	0.0793657			0.65	0.0539119	0.394993	0.0628207	0.05773	0.0844565	0.0437304			0.65	0.00173164	0.094638	0.00427702	-0.00208643	0.0628207	0.0348216			0.65	0.00173164	0.094638	0.0806384	0.146818	0.05773	0.135364			0.65	0.584623	0.496808	0.352994			0.65	0.087	0.20663	0.85189			0.65
	0.651	0.135364	0.041185	-0.187899	0.0997288	-0.149718	0.0602754			0.651	0.0551846	0.384811	0.0679115	0.0691842	0.0984561	0.0360943			0.651	-0.00208643	0.0984561	0.00300433	0.00554971	0.0526392	0.0259127			0.651	-0.00208643	0.0984561	0.0908199	0.130273	0.0831838	0.131546			0.651	0.59735	0.522262	0.365721			0.651	0.07555	0.17482	0.83407			0.651
	0.652	0.115001	0.0284581	-0.19299	0.0920926	-0.130628	0.0539119			0.652	0.0628207	0.392447	0.0882745	0.0653661	0.0984561	0.0437304			0.652	-0.000813741	0.0920926	0.00809509	0.0157312	0.0386396	0.0322762			0.652	-0.000813741	0.0920926	0.0793657	0.143	0.0704569	0.126455			0.652	0.601168	0.517171	0.378448			0.652	0.09973	0.143	0.8608			0.652
	0.653	0.121365	0.037367	-0.191717	0.0730023	-0.153536	0.0870019			0.653	0.061548	0.386084	0.106092	0.0564573	0.0793657	0.0284581			0.653	-0.00844988	0.10991	0.0195493	0.0106405	0.0513665	0.0131859			0.653	-0.00844988	0.10991	0.0984561	0.144273	0.0882745	0.108638			0.653	0.606259	0.501899	0.388629			0.653	0.101	0.13536	0.80098			0.653
	0.654	0.108638	0.0386396	-0.175172	0.0997288	-0.133174	0.0793657			0.654	0.0640934	0.388629	0.0882745	0.0628207	0.0971834	0.0335489			0.654	-0.0122679	0.094638	0.0195493	0.0119132	0.0551846	0.0335489			0.654	-0.0122679	0.094638	0.0984561	0.134091	0.0857292	0.129001			0.654	0.616441	0.532443	0.386084			0.654	0.08318	0.13155	0.80098			0.654
	0.655	0.115001	0.0335489	-0.190444	0.0920926	-0.143355	0.0755476			0.655	0.0831838	0.379721	0.094638	0.0513665	0.094638	0.0220947			0.655	-0.0122679	0.0908199	0.0131859	0.00554971	0.0539119	0.0284581			0.655	-0.0122679	0.0908199	0.0984561	0.141728	0.0806384	0.134091			0.655	0.629168	0.51208	0.400083			0.655	0.07682	0.14555	0.7628			0.655
	0.656	0.120092	0.0360943	-0.187899	0.0844565	-0.154809	0.078093			0.656	0.0831838	0.383539	0.0997288	0.061548	0.10991	0.0399123			0.656	-0.0211768	0.0933653	0.020822	0.0144585	0.0450031	0.0170039			0.656	-0.0211768	0.0933653	0.0870019	0.127728	0.101001	0.139182			0.656	0.636804	0.52608	0.394993			0.656	0.087	0.12264	0.73098			0.656
	0.657	0.129001	0.0322762	-0.187899	0.0857292	-0.153536	0.05773			0.657	0.074275	0.39372	0.0984561	0.0500939	0.0870019	0.0500939			0.657	-0.00208643	0.0844565	0.0119132	0.00809509	0.0488212	0.0284581			0.657	-0.00208643	0.0844565	0.111183	0.131546	0.0971834	0.130273			0.657	0.632986	0.52608	0.396265			0.657	0.08191	0.13791	0.70935			0.657
	0.658	0.0933653	0.0335489	-0.177718	0.078093	-0.1459	0.0717296			0.658	0.0793657	0.388629	0.103547	0.05773	0.104819	0.037367			0.658	0.000458949	0.0882745	0.0182766	0.0119132	0.05773	0.0322762			0.658	0.000458949	0.0882745	0.104819	0.134091	0.116274	0.140455			0.658	0.640622	0.532443	0.398811			0.658	0.087	0.15955	0.70553			0.658
	0.659	0.104819	0.0297308	-0.185354	0.0870019	-0.133174	0.0679115			0.659	0.0857292	0.389902	0.121365	0.05773	0.0870019	0.0424577			0.659	0.0119132	0.102274	0.00300433	0.0233674	0.0437304	0.0220947			0.659	0.0119132	0.102274	0.120092	0.127728	0.111183	0.127728			0.659	0.640622	0.543898	0.41281			0.659	0.08573	0.21682	0.68389			0.659
	0.66	0.120092	0.037367	-0.189172	0.0831838	-0.142082	0.0653661			0.66	0.0920926	0.387357	0.113728	0.0717296	0.104819	0.0399123			0.66	-0.0211768	0.0959107	0.0144585	0.0195493	0.0386396	0.0360943			0.66	-0.0211768	0.0959107	0.116274	0.134091	0.118819	0.145546			0.66	0.641895	0.546443	0.414083			0.66	0.08446	0.25754	0.71317			0.66
	0.661	0.107365	0.0386396	-0.177718	0.104819	-0.148446	0.0819111			0.661	0.0959107	0.377175	0.117546	0.0717296	0.0920926	0.0437304			0.661	-0.0109953	0.094638	0.00809509	0.0195493	0.0424577	0.0259127			0.661	-0.0109953	0.094638	0.12391	0.127728	0.141728	0.127728			0.661	0.667348	0.546443	0.410265			0.661	0.08573	0.27663	0.69789			0.661
	0.662	0.104819	0.0348216	-0.177718	0.078093	-0.142082	0.0691842			0.662	0.0920926	0.382266	0.122637	0.0640934	0.0971834	0.0297308			0.662	0.0131859	0.0908199	-0.000813741	0.0170039	0.0539119	0.0297308			0.662	0.0131859	0.0908199	0.126455	0.125183	0.143	0.132819			0.662	0.652076	0.547716	0.403902			0.662	0.07937	0.297	0.71571			0.662
	0.663	0.120092	0.0259127	-0.182808	0.0908199	-0.1459	0.0793657			0.663	0.0920926	0.388629	0.130273	0.0564573	0.115001	0.061548			0.663	-0.00463181	0.0870019	0.0106405	0.0144585	0.0310035	0.0233674			0.663	-0.00463181	0.0870019	0.126455	0.132819	0.135364	0.129001			0.663	0.653349	0.533716	0.411538			0.663	0.07809	0.26009	0.79844			0.663
	0.664	0.0971834	0.0220947	-0.186626	0.0933653	-0.138264	0.0793657			0.664	0.0933653	0.380993	0.137909	0.0653661	0.0997288	0.0539119			0.664	0.00173164	0.0908199	0.020822	0.00554971	0.0399123	0.0335489			0.664	0.00173164	0.0908199	0.140455	0.143	0.139182	0.148091			0.664	0.660985	0.552806	0.41281			0.664	0.10227	0.26263	0.81116			0.664
	0.665	0.10991	0.0488212	-0.190444	0.0882745	-0.139537	0.0717296			0.665	0.0971834	0.380993	0.137909	0.0628207	0.111183	0.0653661			0.665	0.000458949	0.0908199	0.0106405	0.0233674	0.037367	0.041185			0.665	0.000458949	0.0908199	0.146818	0.134091	0.146818	0.149364			0.665	0.655894	0.551534	0.40772			0.665	0.07809	0.27027	0.80989			0.665
	0.666	0.107365	0.037367	-0.180263	0.0819111	-0.150991	0.0857292			0.666	0.101001	0.383539	0.143	0.0666388	0.106092	0.0551846			0.666	0.0131859	0.0895472	0.020822	0.0131859	0.0628207	0.0144585			0.666	0.0131859	0.0895472	0.118819	0.127728	0.169727	0.134091			0.666	0.641895	0.534989	0.405174			0.666	0.07427	0.25245	0.84807			0.666
	0.667	0.111183	0.0322762	-0.17899	0.0908199	-0.138264	0.074275			0.667	0.102274	0.383539	0.154454	0.0768203	0.122637	0.0640934			0.667	-0.00208643	0.0806384	0.0119132	0.0195493	0.0475485	0.0233674			0.667	-0.00208643	0.0806384	0.132819	0.12391	0.155727	0.141728			0.667	0.657167	0.555352	0.40772			0.667	0.07682	0.20154	0.8328			0.667
	0.668	0.0997288	0.0386396	-0.176445	0.0908199	-0.142082	0.0691842			0.668	0.101001	0.380993	0.157	0.0488212	0.118819	0.0500939			0.668	-0.0224495	0.0984561	0.0144585	0.0195493	0.0348216	0.0157312			0.668	-0.0224495	0.0984561	0.16209	0.120092	0.158273	0.141728			0.668	0.652076	0.547716	0.405174			0.668	0.08064	0.16591	0.82516			0.668
	0.669	0.107365	0.0348216	-0.172627	0.101001	-0.138264	0.074275			0.669	0.10991	0.373357	0.159545	0.0539119	0.104819	0.0526392			0.669	-0.0173587	0.0984561	0.0195493	0.0195493	0.05773	0.0246401			0.669	-0.0173587	0.0984561	0.164636	0.129001	0.151909	0.151909			0.669	0.650803	0.557897	0.410265			0.669	0.09337	0.13664	0.85316			0.669
	0.67	0.107365	0.0297308	-0.185354	0.0908199	-0.136991	0.0793657			0.67	0.103547	0.39372	0.153182	0.078093	0.118819	0.0462758			0.67	-0.0211768	0.0895472	0.00173164	0.0220947	0.037367	0.0335489			0.67	-0.0211768	0.0895472	0.151909	0.129001	0.154454	0.154454			0.67	0.641895	0.548988	0.415356			0.67	0.09209	0.12518	0.82898			0.67
	0.671	0.0984561	0.0386396	-0.182808	0.0908199	-0.139537	0.0691842			0.671	0.113728	0.394993	0.154454	0.0640934	0.113728	0.0730023			0.671	-0.00844988	0.0870019	0.00300433	0.00427702	0.0526392	0.0386396			0.671	-0.00844988	0.0870019	0.151909	0.130273	0.170999	0.146818			0.671	0.632986	0.529898	0.415356			0.671	0.08446	0.11373	0.78698			0.671
	0.672	0.106092	0.0322762	-0.167536	0.0831838	-0.129355	0.0666388			0.672	0.113728	0.375902	0.157	0.0462758	0.104819	0.0679115			0.672	0.000458949	0.106092	-0.00972257	0.0157312	0.0628207	0.041185			0.672	0.000458949	0.106092	0.172272	0.122637	0.165909	0.149364			0.672	0.64444	0.528625	0.400083			0.672	0.087	0.10864	0.74116			0.672
	0.673	0.0984561	0.0271854	-0.154809	0.0755476	-0.120447	0.0679115			0.673	0.101001	0.37463	0.173545	0.0793657	0.101001	0.0475485			0.673	-0.0148133	0.0933653	0.0157312	-0.0059045	0.0590027	0.0182766			0.673	-0.0148133	0.0933653	0.170999	0.130273	0.157	0.130273			0.673	0.632986	0.523534	0.403902			0.673	0.07682	0.15318	0.70935			0.673
	0.674	0.0959107	0.0386396	-0.176445	0.0844565	-0.136991	0.0793657			0.674	0.102274	0.380993	0.174817	0.0717296	0.115001	0.0564573			0.674	-0.0224495	0.0895472	0.0182766	0.0157312	0.0310035	0.0220947			0.674	-0.0224495	0.0895472	0.158273	0.134091	0.177363	0.139182			0.674	0.629168	0.537534	0.40772			0.674	0.08318	0.14045	0.70935			0.674
	0.675	0.108638	0.0335489	-0.170081	0.0997288	-0.1459	0.0831838			0.675	0.111183	0.377175	0.169727	0.0730023	0.113728	0.0551846			0.675	-0.00844988	0.0895472	0.00300433	0.000458949	0.0640934	0.0246401			0.675	-0.00844988	0.0895472	0.157	0.137909	0.186272	0.139182			0.675	0.627895	0.532443	0.410265			0.675	0.08955	0.18245	0.70298			0.675
	0.676	0.10991	0.0348216	-0.168809	0.0844565	-0.142082	0.0704569			0.676	0.111183	0.379721	0.169727	0.0768203	0.121365	0.0704569			0.676	-0.00844988	0.0831838	0.00936778	0.0195493	0.0513665	0.0233674			0.676	-0.00844988	0.0831838	0.155727	0.122637	0.173545	0.145546			0.676	0.635531	0.527353	0.392447			0.676	0.08446	0.227	0.70935			0.676
	0.677	0.115001	0.0335489	-0.176445	0.0844565	-0.134446	0.061548			0.677	0.118819	0.37463	0.172272	0.0717296	0.102274	0.0755476			0.677	0.0068224	0.0959107	0.0131859	0.00300433	0.0513665	0.0322762			0.677	0.0068224	0.0959107	0.163363	0.129001	0.183726	0.145546			0.677	0.634258	0.519716	0.398811			0.677	0.07682	0.241	0.71826			0.677
	0.678	0.107365	0.0259127	-0.161173	0.0882745	-0.131901	0.0590027			0.678	0.115001	0.368266	0.181181	0.05773	0.0997288	0.0768203			0.678	0.00300433	0.0831838	0.0131859	-0.0109953	0.0513665	0.0348216			0.678	0.00300433	0.0831838	0.165909	0.108638	0.191362	0.148091			0.678	0.622804	0.523534	0.378448			0.678	0.073	0.27027	0.71571			0.678
	0.679	0.107365	0.0424577	-0.163718	0.0895472	-0.144628	0.0806384			0.679	0.122637	0.37463	0.179908	0.0691842	0.111183	0.0590027			0.679	-0.00844988	0.0997288	0.00936778	-0.00335912	0.05773	0.0144585			0.679	-0.00844988	0.0997288	0.173545	0.112456	0.181181	0.139182			0.679	0.613895	0.518444	0.392447			0.679	0.07427	0.30081	0.7348			0.679
	0.68	0.111183	0.041185	-0.185354	0.0882745	-0.124265	0.0539119			0.68	0.120092	0.372084	0.186272	0.0653661	0.115001	0.0424577			0.68	-0.00972257	0.0908199	0.0157312	0.00809509	0.0399123	0.0348216			0.68	-0.00972257	0.0908199	0.174817	0.122637	0.201544	0.136637			0.68	0.621532	0.513353	0.391175			0.68	0.08573	0.32754	0.78316			0.68
	0.681	0.10991	0.0360943	-0.175172	0.0895472	-0.143355	0.0679115			0.681	0.108638	0.369539	0.198998	0.05773	0.121365	0.0539119			0.681	-0.0135406	0.0908199	0.0220947	0.0106405	0.041185	0.0462758			0.681	-0.0135406	0.0908199	0.184999	0.125183	0.192635	0.149364			0.681	0.602441	0.500626	0.394993			0.681	0.06918	0.28554	0.80862			0.681
	0.682	0.0971834	0.0246401	-0.1599	0.0844565	-0.138264	0.0653661			0.682	0.117546	0.364448	0.192635	0.0526392	0.101001	0.0704569			0.682	0.00936778	0.0755476	0.000458949	0.0157312	0.0437304	0.0195493			0.682	0.00936778	0.0755476	0.179908	0.134091	0.202817	0.136637			0.682	0.589714	0.500626	0.370812			0.682	0.08446	0.26263	0.84298			0.682
	0.683	0.0882745	0.0437304	-0.181536	0.0768203	-0.128083	0.0691842			0.683	0.127728	0.361903	0.179908	0.0551846	0.115001	0.0539119			0.683	-0.000813741	0.115001	-0.000813741	0.00427702	0.0640934	0.0195493			0.683	-0.000813741	0.115001	0.174817	0.121365	0.200271	0.132819			0.683	0.608805	0.509535	0.406447			0.683	0.07937	0.21045	0.85316			0.683
	0.684	0.0844565	0.0360943	-0.167536	0.0908199	-0.121719	0.078093			0.684	0.120092	0.364448	0.19009	0.0679115	0.116274	0.0679115			0.684	0.0195493	0.0895472	0.0195493	0.0068224	0.0590027	0.0259127			0.684	0.0195493	0.0895472	0.168454	0.106092	0.210453	0.141728			0.684	0.59735	0.494263	0.372084			0.684	0.08446	0.199	0.83789			0.684
	0.685	0.0971834	0.0284581	-0.172627	0.0908199	-0.12681	0.074275			0.685	0.120092	0.373357	0.193908	0.0730023	0.125183	0.074275			0.685	-0.00208643	0.0768203	0.0068224	0.00300433	0.0462758	0.0386396			0.685	-0.00208643	0.0768203	0.19009	0.112456	0.206635	0.150636			0.685	0.590987	0.487899	0.375902			0.685	0.08191	0.16082	0.83789			0.685
	0.686	0.0755476	0.0348216	-0.162445	0.0768203	-0.130628	0.0679115			0.686	0.113728	0.364448	0.179908	0.0653661	0.106092	0.0513665			0.686	-0.0148133	0.104819	0.00173164	0.0195493	0.0526392	0.0233674			0.686	-0.0148133	0.104819	0.178636	0.126455	0.210453	0.145546			0.686	0.583351	0.500626	0.384811			0.686	0.07427	0.15064	0.81753			0.686
	0.687	0.0704569	0.0424577	-0.154809	0.0959107	-0.125537	0.0640934			0.687	0.121365	0.363175	0.191362	0.0679115	0.125183	0.05773			0.687	-0.000813741	0.0857292	0.0106405	0.0068224	0.05773	0.0182766			0.687	-0.000813741	0.0857292	0.19009	0.134091	0.201544	0.150636			0.687	0.564261	0.491717	0.37463			0.687	0.06918	0.13282	0.79971			0.687
	0.688	0.0984561	0.0322762	-0.175172	0.0870019	-0.134446	0.0679115			0.688	0.113728	0.354267	0.207907	0.05773	0.118819	0.0653661			0.688	0.00300433	0.0908199	0.00936778	-0.00717719	0.0462758	0.0170039			0.688	0.00300433	0.0908199	0.186272	0.125183	0.193908	0.129001			0.688	0.575715	0.473899	0.37463			0.688	0.08955	0.10864	0.78062			0.688
	0.689	0.0971834	0.0271854	-0.157355	0.0819111	-0.135719	0.0653661			0.689	0.125183	0.368266	0.20918	0.0628207	0.118819	0.0755476			0.689	-0.00335912	0.0806384	0.0144585	0.0068224	0.0539119	0.0233674			0.689	-0.00335912	0.0806384	0.198998	0.120092	0.214271	0.146818			0.689	0.57826	0.466263	0.358085			0.689	0.08318	0.11755	0.74498			0.689
	0.69	0.0984561	0.0475485	-0.162445	0.0819111	-0.131901	0.0730023			0.69	0.116274	0.365721	0.204089	0.0717296	0.129001	0.0666388			0.69	0.00809509	0.0908199	0.0119132	-0.00844988	0.061548	0.0271854			0.69	0.00809509	0.0908199	0.188817	0.12391	0.211725	0.146818			0.69	0.570624	0.471354	0.363175			0.69	0.08955	0.13791	0.7068			0.69
	0.691	0.0959107	0.0386396	-0.164991	0.0819111	-0.108992	0.0526392			0.691	0.111183	0.368266	0.210453	0.0653661	0.130273	0.0730023			0.691	-0.0148133	0.0933653	-0.00972257	0.0131859	0.0564573	0.0284581			0.691	-0.0148133	0.0933653	0.188817	0.120092	0.202817	0.151909			0.691	0.556624	0.457355	0.344085			0.691	0.07809	0.17482	0.69026			0.691
	0.692	0.0882745	0.0386396	-0.157355	0.0882745	-0.142082	0.05773			0.692	0.113728	0.36063	0.201544	0.0704569	0.129001	0.0590027			0.692	-0.00844988	0.0959107	0.00809509	0.0144585	0.0704569	0.0131859			0.692	-0.00844988	0.0959107	0.20918	0.126455	0.204089	0.160818			0.692	0.542625	0.458627	0.352994			0.692	0.07427	0.22063	0.68262			0.692
	0.693	0.0997288	0.0462758	-0.171354	0.0819111	-0.128083	0.0730023			0.693	0.12391	0.352994	0.195181	0.0628207	0.117546	0.0666388			0.693	-0.00717719	0.0870019	0.00809509	0.00427702	0.0526392	0.0220947			0.693	-0.00717719	0.0870019	0.183726	0.121365	0.221907	0.139182			0.693	0.548988	0.4599	0.356812			0.693	0.08955	0.23591	0.6788			0.693
	0.694	0.102274	0.0399123	-0.148446	0.101001	-0.122992	0.05773			0.694	0.120092	0.351721	0.196453	0.0679115	0.129001	0.0500939			0.694	0.00300433	0.0882745	0.00427702	0.0131859	0.0539119	0.0399123			0.694	0.00300433	0.0882745	0.192635	0.101001	0.224452	0.16209			0.694	0.542625	0.4459	0.355539			0.694	0.08064	0.24609	0.70171			0.694
	0.695	0.0959107	0.0348216	-0.161173	0.0768203	-0.117901	0.0717296			0.695	0.117546	0.352994	0.20918	0.0539119	0.107365	0.0628207			0.695	-0.00208643	0.0908199	0.0233674	0.000458949	0.0653661	0.0246401			0.695	-0.00208643	0.0908199	0.184999	0.122637	0.214271	0.141728			0.695	0.529898	0.438264	0.337722			0.695	0.08446	0.27791	0.72844			0.695
	0.696	0.0870019	0.0360943	-0.147173	0.0793657	-0.120447	0.0679115			0.696	0.117546	0.350449	0.19009	0.0730023	0.125183	0.0475485			0.696	-0.00844988	0.0806384	0.00173164	0.00936778	0.0564573	0.0322762			0.696	-0.00844988	0.0806384	0.19009	0.125183	0.219362	0.154454			0.696	0.536261	0.438264	0.342813			0.696	0.087	0.25245	0.75898			0.696
	0.697	0.107365	0.0259127	-0.154809	0.0959107	-0.120447	0.0870019			0.697	0.120092	0.352994	0.220634	0.0590027	0.125183	0.0526392			0.697	-0.0224495	0.0857292	0.0182766	-0.00208643	0.074275	0.0310035			0.697	-0.0224495	0.0857292	0.196453	0.130273	0.22827	0.145546			0.697	0.534989	0.450991	0.32754			0.697	0.08191	0.283	0.77171			0.697
	0.698	0.0819111	0.0310035	-0.161173	0.0882745	-0.114083	0.0590027			0.698	0.118819	0.342813	0.211725	0.0666388	0.127728	0.0513665			0.698	-0.0059045	0.0908199	0.0106405	0.00809509	0.061548	0.0284581			0.698	-0.0059045	0.0908199	0.186272	0.134091	0.221907	0.155727			0.698	0.527353	0.430628	0.354267			0.698	0.06028	0.27281	0.80225			0.698
	0.699	0.094638	0.0335489	-0.152264	0.0793657	-0.114083	0.0628207			0.699	0.122637	0.337722	0.211725	0.0640934	0.130273	0.0488212			0.699	-0.0173587	0.0908199	0.00809509	-0.00463181	0.0424577	0.0157312			0.699	-0.0173587	0.0908199	0.192635	0.115001	0.24227	0.136637			0.699	0.520989	0.438264	0.333904			0.699	0.073	0.26136	0.8188			0.699
	0.7	0.102274	0.0271854	-0.156082	0.0933653	-0.115356	0.05773			0.7	0.116274	0.338994	0.204089	0.0806384	0.136637	0.0755476			0.7	-0.0173587	0.0844565	0.0131859	-0.00335912	0.0679115	0.0144585			0.7	-0.0173587	0.0844565	0.215543	0.117546	0.239725	0.154454			0.7	0.520989	0.428083	0.323722			0.7	0.07682	0.23972	0.83407			0.7
	0.701	0.0870019	0.0297308	-0.163718	0.0768203	-0.108992	0.074275			0.701	0.125183	0.349176	0.201544	0.05773	0.118819	0.0691842			0.701	-0.0148133	0.0882745	0.00427702	0.00300433	0.0691842	0.0233674			0.701	-0.0148133	0.0882745	0.195181	0.122637	0.218089	0.158273			0.701	0.51208	0.434446	0.335176			0.701	0.087	0.17864	0.86462			0.701
	0.702	0.0895472	0.0271854	-0.144628	0.0882745	-0.124265	0.0539119			0.702	0.121365	0.347903	0.205362	0.0628207	0.120092	0.0551846			0.702	-0.0173587	0.0844565	0.00936778	0.0106405	0.0602754	0.0322762			0.702	-0.0173587	0.0844565	0.188817	0.130273	0.20918	0.145546			0.702	0.485354	0.425537	0.336449			0.702	0.07809	0.17354	0.85825			0.702
	0.703	0.0755476	0.0335489	-0.139537	0.0819111	-0.125537	0.0717296			0.703	0.107365	0.347903	0.210453	0.0704569	0.120092	0.0513665			0.703	-0.00972257	0.0933653	0.0068224	0.00554971	0.0679115	0.0220947			0.703	-0.00972257	0.0933653	0.195181	0.149364	0.224452	0.160818			0.703	0.505717	0.40772	0.318631			0.703	0.07427	0.14427	0.8188			0.703
	0.704	0.0857292	0.0335489	-0.161173	0.0831838	-0.117901	0.0539119			0.704	0.102274	0.332631	0.221907	0.0564573	0.144273	0.0475485			0.704	-0.00844988	0.0870019	0.0131859	-0.00463181	0.0640934	0.0170039			0.704	-0.00844988	0.0870019	0.184999	0.129001	0.246088	0.150636			0.704	0.500626	0.42681	0.300814			0.704	0.09718	0.14555	0.79716			0.704
	0.705	0.0920926	0.0284581	-0.149718	0.0806384	-0.115356	0.0691842			0.705	0.120092	0.324995	0.201544	0.0590027	0.118819	0.0564573			0.705	-0.0262675	0.0971834	0.0195493	0.00554971	0.0704569	0.037367			0.705	-0.0262675	0.0971834	0.178636	0.103547	0.221907	0.160818			0.705	0.491717	0.40772	0.318631			0.705	0.09082	0.14809	0.7488			0.705
	0.706	0.0971834	0.041185	-0.148446	0.0806384	-0.0962655	0.0653661			0.706	0.122637	0.335176	0.218089	0.0679115	0.127728	0.0755476			0.706	-0.0237222	0.0971834	-0.0059045	0.0119132	0.0564573	0.0144585			0.706	-0.0237222	0.0971834	0.19009	0.117546	0.226998	0.165909			0.706	0.490445	0.400083	0.313541			0.706	0.07937	0.14427	0.71317			0.706
	0.707	0.0870019	0.0360943	-0.1599	0.0933653	-0.0975382	0.0755476			0.707	0.111183	0.330086	0.229543	0.0437304	0.132819	0.0551846			0.707	-0.0135406	0.0806384	-0.00717719	-0.00717719	0.0691842	0.00809509			0.707	-0.0135406	0.0806384	0.187544	0.139182	0.229543	0.140455			0.707	0.491717	0.392447	0.303359			0.707	0.07682	0.12773	0.73607			0.707
	0.708	0.0844565	0.0297308	-0.134446	0.0730023	-0.115356	0.0539119			0.708	0.118819	0.332631	0.221907	0.0691842	0.135364	0.0564573			0.708	-0.0211768	0.0768203	0.0144585	0.0157312	0.0679115	0.041185			0.708	-0.0211768	0.0768203	0.196453	0.131546	0.22827	0.135364			0.708	0.476445	0.40772	0.296996			0.708	0.08318	0.17864	0.68771			0.708
	0.709	0.0793657	0.0322762	-0.162445	0.0806384	-0.102629	0.0717296			0.709	0.108638	0.340267	0.202817	0.0679115	0.111183	0.0564573			0.709	-0.0186314	0.0997288	0.0195493	-0.016086	0.0730023	0.020822			0.709	-0.0186314	0.0997288	0.182454	0.136637	0.232089	0.144273			0.709	0.47899	0.389902	0.298268			0.709	0.07555	0.22445	0.68644			0.709
	0.71	0.0870019	0.0220947	-0.135719	0.0653661	-0.0911747	0.05773			0.71	0.106092	0.331358	0.211725	0.0564573	0.127728	0.0653661			0.71	-0.0059045	0.0857292	-0.00335912	0.0068224	0.0666388	0.0284581			0.71	-0.0059045	0.0857292	0.193908	0.127728	0.22827	0.160818			0.71	0.468809	0.394993	0.303359			0.71	0.07555	0.25118	0.71062			0.71
	0.711	0.0933653	0.0259127	-0.14081	0.0920926	-0.086084	0.0704569			0.711	0.113728	0.323722	0.215543	0.0679115	0.125183	0.0564573			0.711	-0.0237222	0.0755476	0.0170039	0.00936778	0.0768203	0.0182766			0.711	-0.0237222	0.0755476	0.19009	0.135364	0.22318	0.160818			0.711	0.461173	0.389902	0.293178			0.711	0.08827	0.26263	0.68517			0.711
	0.712	0.0870019	0.0170039	-0.144628	0.0844565	-0.103902	0.0640934			0.712	0.10991	0.309723	0.205362	0.041185	0.113728	0.0640934			0.712	-0.0199041	0.0933653	0.00173164	-0.00208643	0.0755476	0.0182766			0.712	-0.0199041	0.0933653	0.186272	0.135364	0.237179	0.158273			0.712	0.464991	0.386084	0.302086			0.712	0.08318	0.283	0.71062			0.712
	0.713	0.0920926	0.0399123	-0.131901	0.0679115	-0.114083	0.0628207			0.713	0.101001	0.323722	0.215543	0.0526392	0.140455	0.0602754			0.713	-0.00972257	0.0984561	-0.0109953	-0.00335912	0.0691842	0.0131859			0.713	-0.00972257	0.0984561	0.169727	0.120092	0.234634	0.149364			0.713	0.464991	0.382266	0.289359			0.713	0.07937	0.2919	0.7768			0.713
	0.714	0.0806384	0.0271854	-0.133174	0.0793657	-0.105174	0.05773			0.714	0.108638	0.317359	0.219362	0.0653661	0.115001	0.0564573			0.714	-0.0237222	0.0908199	0.00173164	0.00809509	0.0691842	0.0259127			0.714	-0.0237222	0.0908199	0.195181	0.136637	0.22827	0.145546			0.714	0.449718	0.394993	0.291905			0.714	0.08827	0.27409	0.80225			0.714
	0.715	0.0857292	0.0322762	-0.130628	0.0831838	-0.103902	0.0666388			0.715	0.121365	0.313541	0.225725	0.0640934	0.112456	0.0679115			0.715	-0.0199041	0.0908199	0.0119132	-0.00208643	0.0831838	0.0220947			0.715	-0.0199041	0.0908199	0.19009	0.134091	0.216816	0.150636			0.715	0.457355	0.372084	0.288087			0.715	0.07555	0.25882	0.8048			0.715
	0.716	0.0870019	0.0284581	-0.148446	0.0793657	-0.0962655	0.0666388			0.716	0.113728	0.310995	0.20918	0.0653661	0.104819	0.061548			0.716	-0.0428125	0.074275	0.00554971	0.00554971	0.0730023	0.0271854			0.716	-0.0428125	0.074275	0.173545	0.120092	0.202817	0.144273			0.716	0.454809	0.373357	0.279178			0.716	0.073	0.241	0.83153			0.716
	0.717	0.0895472	0.0297308	-0.133174	0.0831838	-0.100084	0.061548			0.717	0.10991	0.312268	0.225725	0.0628207	0.127728	0.0628207			0.717	-0.0313583	0.0870019	-0.00208643	0.00173164	0.078093	0.0259127			0.717	-0.0313583	0.0870019	0.155727	0.112456	0.239725	0.130273			0.717	0.436991	0.400083	0.298268			0.717	0.09464	0.18627	0.82262			0.717
	0.718	0.0908199	0.0399123	-0.135719	0.0908199	-0.0949928	0.0628207			0.718	0.113728	0.30845	0.205362	0.0475485	0.132819	0.0539119			0.718	-0.0148133	0.0908199	0.0182766	0.00809509	0.0488212	0.0157312			0.718	-0.0148133	0.0908199	0.177363	0.125183	0.229543	0.136637			0.718	0.430628	0.351721	0.285541			0.718	0.09973	0.15191	0.82516			0.718
	0.719	0.0870019	0.0220947	-0.135719	0.0628207	-0.102629	0.0691842			0.719	0.10991	0.299541	0.226998	0.041185	0.12391	0.0590027			0.719	-0.0148133	0.0844565	0.00936778	0.0182766	0.0602754	0.0233674			0.719	-0.0148133	0.0844565	0.169727	0.120092	0.220634	0.165909			0.719	0.435719	0.355539	0.268997			0.719	0.09209	0.12773	0.80862			0.719
	0.72	0.0768203	0.0360943	-0.135719	0.0793657	-0.086084	0.0640934			0.72	0.111183	0.304632	0.211725	0.0704569	0.118819	0.0424577			0.72	-0.0135406	0.0806384	0.00809509	0.00554971	0.0730023	0.0233674			0.72	-0.0135406	0.0806384	0.144273	0.148091	0.20918	0.165909			0.72	0.433173	0.375902	0.285541			0.72	0.08064	0.11118	0.79462			0.72
	0.721	0.0793657	0.0360943	-0.147173	0.0920926	-0.0911747	0.0730023			0.721	0.113728	0.307177	0.212998	0.0666388	0.125183	0.0666388			0.721	-0.0173587	0.0920926	0.00300433	0.0233674	0.0691842	0.0195493			0.721	-0.0173587	0.0920926	0.140455	0.130273	0.215543	0.141728			0.721	0.4459	0.363175	0.285541			0.721	0.08064	0.10482	0.78189			0.721
	0.722	0.0793657	0.0348216	-0.130628	0.0653661	-0.073357	0.05773			0.722	0.113728	0.300814	0.226998	0.0513665	0.122637	0.0628207			0.722	-0.00208643	0.094638	0.0119132	-0.0122679	0.0870019	0.0144585			0.722	-0.00208643	0.094638	0.144273	0.115001	0.204089	0.148091			0.722	0.41281	0.352994	0.276633			0.722	0.073	0.11373	0.71444			0.722
	0.723	0.094638	0.0195493	-0.14081	0.078093	-0.086084	0.0424577			0.723	0.113728	0.298268	0.221907	0.061548	0.135364	0.0488212			0.723	0.00173164	0.0819111	-0.00335912	0.000458949	0.05773	0.0195493			0.723	0.00173164	0.0819111	0.140455	0.130273	0.210453	0.141728			0.723	0.439537	0.351721	0.268997			0.723	0.08318	0.12009	0.69662			0.723
	0.724	0.078093	0.0131859	-0.136991	0.0717296	-0.0822659	0.0628207			0.724	0.116274	0.288087	0.235906	0.0653661	0.121365	0.0602754			0.724	-0.0186314	0.0844565	0.0157312	0.00809509	0.078093	0.0068224			0.724	-0.0186314	0.0844565	0.145546	0.12391	0.19009	0.150636			0.724	0.414083	0.36063	0.277905			0.724	0.08318	0.12264	0.67753			0.724
	0.725	0.0590027	0.0271854	-0.120447	0.0704569	-0.0949928	0.0679115			0.725	0.108638	0.304632	0.226998	0.05773	0.137909	0.0513665			0.725	-0.0059045	0.0844565	0.0068224	0.00300433	0.0666388	0.020822			0.725	-0.0059045	0.0844565	0.137909	0.134091	0.20918	0.154454			0.725	0.400083	0.350449	0.277905			0.725	0.08573	0.17227	0.66608			0.725
	0.726	0.0819111	0.037367	-0.136991	0.0704569	-0.086084	0.0564573			0.726	0.112456	0.285541	0.232089	0.0628207	0.137909	0.05773			0.726	-0.00972257	0.0857292	0.00936778	-0.0109953	0.0704569	0.0310035			0.726	-0.00972257	0.0857292	0.125183	0.111183	0.211725	0.150636			0.726	0.415356	0.346631	0.271542			0.726	0.09337	0.20282	0.67371			0.726
	0.727	0.0831838	0.0386396	-0.117901	0.0908199	-0.102629	0.0590027			0.727	0.108638	0.291905	0.229543	0.05773	0.131546	0.0551846			0.727	-0.0109953	0.0920926	0.0068224	0.00936778	0.0882745	0.0284581			0.727	-0.0109953	0.0920926	0.125183	0.139182	0.200271	0.144273			0.727	0.40772	0.355539	0.252451			0.727	0.09209	0.22445	0.68644			0.727
	0.728	0.0717296	0.0284581	-0.138264	0.078093	-0.086084	0.0526392			0.728	0.111183	0.288087	0.20918	0.0640934	0.131546	0.05773			0.728	-0.00972257	0.0933653	0.00554971	0.00809509	0.0844565	0.0233674			0.728	-0.00972257	0.0933653	0.135364	0.12391	0.197726	0.143			0.728	0.425537	0.345358	0.25627			0.728	0.08318	0.23209	0.6928			0.728
	0.729	0.094638	0.0195493	-0.124265	0.0844565	-0.0809932	0.0590027			0.729	0.112456	0.290632	0.232089	0.0424577	0.12391	0.0539119			0.729	0.000458949	0.094638	0.0170039	0.00173164	0.0768203	0.0144585			0.729	0.000458949	0.094638	0.125183	0.117546	0.19009	0.150636			0.729	0.401356	0.332631	0.262633			0.729	0.07937	0.26518	0.7348			0.729
	0.73	0.0653661	0.037367	-0.122992	0.0768203	-0.0784478	0.05773			0.73	0.107365	0.282996	0.232089	0.0526392	0.149364	0.0500939			0.73	-0.00717719	0.0908199	0.00936778	0.0119132	0.0717296	0.0182766			0.73	-0.00717719	0.0908199	0.103547	0.125183	0.187544	0.149364			0.73	0.403902	0.337722	0.254997			0.73	0.09973	0.27409	0.74626			0.73
	0.731	0.0793657	0.0131859	-0.12681	0.0590027	-0.0746297	0.0640934			0.731	0.10991	0.291905	0.233361	0.0704569	0.134091	0.0628207			0.731	-0.0199041	0.0959107	-0.00335912	0.00300433	0.0768203	0.0220947			0.731	-0.0199041	0.0959107	0.127728	0.115001	0.178636	0.144273			0.731	0.410265	0.328813	0.25627			0.731	0.09718	0.25882	0.7768			0.731
	0.732	0.078093	0.0348216	-0.128083	0.0831838	-0.0682663	0.0717296			0.732	0.121365	0.293178	0.233361	0.0450031	0.134091	0.0500939			0.732	-0.0199041	0.078093	0.00809509	0.0106405	0.0971834	0.0322762			0.732	-0.0199041	0.078093	0.120092	0.108638	0.174817	0.149364			0.732	0.40772	0.342813	0.252451			0.732	0.05773	0.25245	0.81498			0.732
	0.733	0.0806384	0.0310035	-0.116628	0.074275	-0.0746297	0.0590027			0.733	0.115001	0.280451	0.216816	0.0551846	0.130273	0.0590027			0.733	-0.0186314	0.0857292	0.0106405	0.00554971	0.061548	0.0220947			0.733	-0.0186314	0.0857292	0.111183	0.125183	0.164636	0.151909			0.733	0.389902	0.337722	0.265178			0.733	0.09209	0.21809	0.82262			0.733
	0.734	0.0971834	0.0335489	-0.106447	0.0679115	-0.0809932	0.0526392			0.734	0.115001	0.271542	0.22827	0.0628207	0.149364	0.0628207			0.734	-0.0173587	0.0933653	0.0170039	-0.00208643	0.0819111	0.0259127			0.734	-0.0173587	0.0933653	0.104819	0.116274	0.127728	0.143			0.734	0.39372	0.331358	0.27536			0.734	0.10482	0.16845	0.83789			0.734
	0.735	0.0730023	0.0182766	-0.124265	0.0831838	-0.0873566	0.0551846			0.735	0.104819	0.268997	0.214271	0.0666388	0.12391	0.0564573			0.735	-0.00208643	0.0844565	0.00809509	0.00427702	0.0730023	0.0348216			0.735	-0.00208643	0.0844565	0.10991	0.115001	0.0997288	0.134091			0.735	0.391175	0.331358	0.239725			0.735	0.10355	0.13791	0.80734			0.735
	0.736	0.0666388	0.0335489	-0.120447	0.0666388	-0.0822659	0.0628207			0.736	0.107365	0.271542	0.214271	0.0691842	0.137909	0.0564573			0.736	-0.00463181	0.0870019	0.00809509	-0.00335912	0.0666388	0.0195493			0.736	-0.00463181	0.0870019	0.104819	0.106092	0.139182	0.127728			0.736	0.387357	0.328813	0.22827			0.736	0.08446	0.15064	0.80098			0.736
	0.737	0.074275	0.0437304	-0.105174	0.0793657	-0.0873566	0.0679115			0.737	0.108638	0.274087	0.229543	0.0691842	0.135364	0.0539119			0.737	-0.00335912	0.0908199	0.0068224	-0.00335912	0.0768203	0.0195493			0.737	-0.00335912	0.0908199	0.0997288	0.12391	0.148091	0.143			0.737	0.398811	0.337722	0.25627			0.737	0.09082	0.115	0.78825			0.737
	0.738	0.0704569	0.0386396	-0.122992	0.0806384	-0.0682663	0.041185			0.738	0.101001	0.281723	0.226998	0.0640934	0.136637	0.037367			0.738	0.000458949	0.0984561	0.000458949	-0.00208643	0.0704569	0.0157312			0.738	0.000458949	0.0984561	0.101001	0.134091	0.154454	0.127728			0.738	0.389902	0.30845	0.254997			0.738	0.08191	0.11373	0.7488			0.738
	0.739	0.0895472	0.0119132	-0.125537	0.078093	-0.0771751	0.05773			0.739	0.0844565	0.268997	0.221907	0.0539119	0.151909	0.0666388			0.739	-0.0059045	0.0831838	0.0157312	0.0195493	0.0640934	0.0310035			0.739	-0.0059045	0.0831838	0.0920926	0.107365	0.146818	0.144273			0.739	0.382266	0.322449	0.237179			0.739	0.08955	0.09337	0.72716			0.739
	0.74	0.0819111	0.0386396	-0.116628	0.0730023	-0.0822659	0.0462758			0.74	0.0768203	0.265178	0.232089	0.0526392	0.132819	0.0526392			0.74	-0.00844988	0.0844565	0.0233674	0.00936778	0.0666388	0.0271854			0.74	-0.00844988	0.0844565	0.0882745	0.122637	0.155727	0.153182			0.74	0.37463	0.32754	0.240997			0.74	0.09718	0.11246	0.68771			0.74
	0.741	0.0755476	0.0284581	-0.116628	0.0717296	-0.0746297	0.0602754			0.741	0.0640934	0.267724	0.232089	0.0526392	0.136637	0.0526392			0.741	-0.00208643	0.0933653	0.00300433	0.0119132	0.0844565	0.0131859			0.741	-0.00208643	0.0933653	0.0959107	0.116274	0.140455	0.151909			0.741	0.391175	0.328813	0.262633			0.741	0.073	0.14936	0.66735			0.741
	0.742	0.0602754	0.0335489	-0.117901	0.0831838	-0.0886293	0.0526392			0.742	0.0640934	0.270269	0.229543	0.0691842	0.121365	0.0602754			0.742	-0.0122679	0.0920926	0.00809509	0.00427702	0.0691842	0.0360943			0.742	-0.0122679	0.0920926	0.0844565	0.0870019	0.143	0.139182			0.742	0.366994	0.303359	0.24227			0.742	0.09082	0.20536	0.67117			0.742
	0.743	0.0640934	0.0500939	-0.116628	0.0768203	-0.0657209	0.0590027			0.743	0.0679115	0.270269	0.233361	0.0844565	0.125183	0.0564573			0.743	-0.0173587	0.0959107	0.00427702	0.00554971	0.0793657	0.0348216			0.743	-0.0173587	0.0959107	0.0857292	0.118819	0.160818	0.135364			0.743	0.358085	0.30845	0.247361			0.743	0.09337	0.21809	0.64953			0.743
	0.744	0.0691842	0.0335489	-0.114083	0.0590027	-0.0631755	0.0513665			0.744	0.0768203	0.272815	0.22318	0.0704569	0.134091	0.0500939			0.744	-0.000813741	0.0997288	0.00936778	-0.00972257	0.0755476	0.0233674			0.744	-0.000813741	0.0997288	0.074275	0.0984561	0.157	0.135364			0.744	0.370812	0.313541	0.243543			0.744	0.087	0.23082	0.66862			0.744
	0.745	0.0793657	0.0322762	-0.124265	0.0768203	-0.0835386	0.0653661			0.745	0.061548	0.267724	0.235906	0.0768203	0.140455	0.0462758			0.745	-0.0199041	0.094638	0.0157312	0.0170039	0.0691842	0.020822			0.745	-0.0199041	0.094638	0.0933653	0.122637	0.141728	0.149364			0.745	0.377175	0.328813	0.248633			0.745	0.09846	0.255	0.71062			0.745
	0.746	0.0679115	0.0284581	-0.103902	0.074275	-0.0657209	0.05773			0.746	0.0653661	0.266451	0.226998	0.0844565	0.131546	0.0513665			0.746	-0.0237222	0.094638	0.0068224	0.000458949	0.0806384	0.0144585			0.746	-0.0237222	0.094638	0.0628207	0.10991	0.140455	0.143			0.746	0.36063	0.303359	0.234634			0.746	0.09337	0.255	0.74116			0.746
	0.747	0.0755476	0.0271854	-0.105174	0.0920926	-0.0784478	0.0602754			0.747	0.0793657	0.260088	0.224452	0.0628207	0.126455	0.0526392			0.747	-0.0148133	0.094638	0.00554971	0.0068224	0.0793657	0.0271854			0.747	-0.0148133	0.094638	0.0857292	0.0920926	0.144273	0.145546			0.747	0.378448	0.305905	0.243543			0.747	0.08573	0.26009	0.76662			0.747
	0.748	0.0730023	0.0322762	-0.108992	0.0755476	-0.0555394	0.0539119			0.748	0.0870019	0.254997	0.219362	0.05773	0.144273	0.074275			0.748	-0.0211768	0.0857292	0.00936778	0.0068224	0.0882745	0.0360943			0.748	-0.0211768	0.0857292	0.0933653	0.0984561	0.149364	0.140455			0.748	0.377175	0.307177	0.221907			0.748	0.07937	0.26772	0.78571			0.748
	0.749	0.0819111	0.0310035	-0.10772	0.0768203	-0.0619029	0.0488212			0.749	0.0844565	0.266451	0.240997	0.0691842	0.132819	0.0564573			0.749	-0.0249948	0.0882745	0.0157312	0.0233674	0.0768203	0.0271854			0.749	-0.0249948	0.0882745	0.0793657	0.0920926	0.135364	0.122637			0.749	0.368266	0.310995	0.232089			0.749	0.10355	0.25754	0.79462			0.749
	0.75	0.0755476	0.0195493	-0.0962655	0.0666388	-0.0746297	0.0526392			0.75	0.0844565	0.262633	0.232089	0.0691842	0.135364	0.0704569			0.75	-0.00717719	0.0971834	0.0182766	0.0170039	0.0831838	0.0386396			0.75	-0.00717719	0.0971834	0.0539119	0.113728	0.145546	0.143			0.75	0.36063	0.304632	0.219362			0.75	0.08191	0.17354	0.82643			0.75
	0.751	0.0691842	0.0271854	-0.100084	0.0691842	-0.0593575	0.0539119			0.751	0.0908199	0.257542	0.221907	0.0590027	0.137909	0.0462758			0.751	-0.00972257	0.0882745	0.0182766	0.00173164	0.0768203	0.0386396			0.751	-0.00972257	0.0882745	0.0640934	0.101001	0.130273	0.145546			0.751	0.373357	0.326267	0.232089			0.751	0.09591	0.13664	0.82262			0.751
	0.752	0.0717296	0.0335489	-0.10772	0.0768203	-0.0580848	0.0488212			0.752	0.107365	0.260088	0.215543	0.0564573	0.150636	0.05773			0.752	-0.0224495	0.078093	0.0119132	0.0157312	0.0831838	0.0233674			0.752	-0.0224495	0.078093	0.0730023	0.0997288	0.134091	0.130273			0.752	0.356812	0.305905	0.24227			0.752	0.10482	0.13664	0.80862			0.752
	0.753	0.078093	0.0310035	-0.115356	0.0717296	-0.0682663	0.0500939			0.753	0.104819	0.26136	0.225725	0.0640934	0.140455	0.0755476			0.753	-0.0109953	0.0895472	0.0119132	0.0119132	0.0831838	0.0182766			0.753	-0.0109953	0.0895472	0.0717296	0.120092	0.116274	0.132819			0.753	0.358085	0.290632	0.22318			0.753	0.08827	0.101	0.80734			0.753
	0.754	0.061548	0.0360943	-0.0937201	0.0679115	-0.0720844	0.0602754			0.754	0.0933653	0.262633	0.239725	0.0628207	0.143	0.0539119			0.754	-0.00717719	0.094638	0.00173164	0.0233674	0.061548	0.0284581			0.754	-0.00717719	0.094638	0.0666388	0.0984561	0.115001	0.130273			0.754	0.359357	0.307177	0.215543			0.754	0.09082	0.115	0.76025			0.754
	0.755	0.0730023	0.0259127	-0.103902	0.0679115	-0.0555394	0.0475485			0.755	0.0984561	0.267724	0.230816	0.0513665	0.127728	0.074275			0.755	-0.00463181	0.0908199	0.0119132	0.0182766	0.078093	0.037367			0.755	-0.00463181	0.0908199	0.0551846	0.0997288	0.125183	0.131546			0.755	0.363175	0.290632	0.237179			0.755	0.07682	0.12646	0.70044			0.755
	0.756	0.0640934	0.0335489	-0.0937201	0.074275	-0.0644482	0.0526392			0.756	0.101001	0.260088	0.230816	0.0488212	0.148091	0.0551846			0.756	-0.0173587	0.0908199	0.0106405	0.00427702	0.0730023	0.0322762			0.756	-0.0173587	0.0908199	0.0679115	0.0959107	0.113728	0.141728			0.756	0.347903	0.286814	0.220634			0.756	0.08446	0.12009	0.6928			0.756
	0.757	0.0602754	0.0297308	-0.0962655	0.0755476	-0.0542667	0.0730023			0.757	0.107365	0.262633	0.226998	0.0730023	0.144273	0.0590027			0.757	-0.00844988	0.0831838	0.020822	0.00554971	0.0819111	0.0335489			0.757	-0.00844988	0.0831838	0.061548	0.0844565	0.120092	0.127728			0.757	0.366994	0.300814	0.224452			0.757	0.08827	0.13664	0.68898			0.757
	0.758	0.0666388	0.0348216	-0.102629	0.0793657	-0.0466306	0.0564573			0.758	0.0971834	0.262633	0.24227	0.0564573	0.141728	0.0730023			0.758	-0.0249948	0.0768203	0.00936778	0.00809509	0.074275	0.0348216			0.758	-0.0249948	0.0768203	0.0666388	0.101001	0.111183	0.129001			0.758	0.351721	0.303359	0.225725			0.758	0.101	0.15064	0.65971			0.758
	0.759	0.0730023	0.0322762	-0.0848113	0.0768203	-0.0644482	0.0462758			0.759	0.0920926	0.262633	0.216816	0.0462758	0.146818	0.0691842			0.759	-0.0059045	0.0959107	0.0068224	0.0131859	0.0628207	0.0360943			0.759	-0.0059045	0.0959107	0.0590027	0.0908199	0.12391	0.130273			0.759	0.352994	0.291905	0.220634			0.759	0.09464	0.20282	0.65844			0.759
	0.76	0.0628207	0.0297308	-0.103902	0.0730023	-0.0619029	0.0551846			0.76	0.0920926	0.260088	0.232089	0.0653661	0.145546	0.0666388			0.76	0.00809509	0.0857292	0.0259127	0.0182766	0.0844565	0.0310035			0.76	0.00809509	0.0857292	0.0717296	0.0895472	0.115001	0.139182			0.76	0.355539	0.299541	0.216816			0.76	0.08827	0.26772	0.66989			0.76
	0.761	0.0717296	0.0348216	-0.0924474	0.074275	-0.0606302	0.0666388			0.761	0.0971834	0.26136	0.22827	0.0640934	0.125183	0.0717296			0.761	-0.0059045	0.101001	0.0106405	0.0157312	0.0704569	0.0348216			0.761	-0.0059045	0.101001	0.0640934	0.0870019	0.102274	0.143			0.761	0.337722	0.271542	0.22318			0.761	0.08064	0.26009	0.70807			0.761
	0.762	0.0602754	0.0310035	-0.089902	0.0564573	-0.0593575	0.0488212			0.762	0.0920926	0.254997	0.232089	0.0653661	0.120092	0.0602754			0.762	-0.00844988	0.0882745	-0.00208643	0.0182766	0.0691842	0.0322762			0.762	-0.00844988	0.0882745	0.0526392	0.0997288	0.127728	0.121365			0.762	0.361903	0.288087	0.224452			0.762	0.08955	0.27536	0.68389			0.762
	0.763	0.0704569	0.0322762	-0.108992	0.074275	-0.0619029	0.0539119			0.763	0.074275	0.248633	0.234634	0.0704569	0.154454	0.0628207			0.763	-0.00463181	0.0971834	0.0182766	0.00936778	0.0704569	0.0322762			0.763	-0.00463181	0.0971834	0.0959107	0.102274	0.117546	0.121365			0.763	0.342813	0.284269	0.235906			0.763	0.08191	0.28172	0.75771			0.763
	0.764	0.0640934	0.0068224	-0.0949928	0.0602754	-0.052994	0.0564573			0.764	0.0704569	0.257542	0.251179	0.0730023	0.144273	0.061548			0.764	-0.00208643	0.0882745	0.0246401	0.0182766	0.0895472	0.0284581			0.764	-0.00208643	0.0882745	0.0679115	0.0844565	0.130273	0.120092			0.764	0.349176	0.293178	0.20918			0.764	0.07809	0.28936	0.79334			0.764
	0.765	0.0666388	0.0284581	-0.100084	0.0704569	-0.0593575	0.0424577			0.765	0.0870019	0.260088	0.230816	0.074275	0.136637	0.0768203			0.765	-0.00717719	0.0882745	0.0170039	0.00809509	0.0831838	0.0259127			0.765	-0.00717719	0.0882745	0.0691842	0.0857292	0.121365	0.120092			0.765	0.349176	0.282996	0.206635			0.765	0.10609	0.27027	0.82007			0.765
	0.766	0.0679115	0.0297308	-0.0784478	0.0717296	-0.0377217	0.041185			0.766	0.0971834	0.257542	0.229543	0.0564573	0.139182	0.0590027			0.766	-0.00972257	0.0959107	0.0233674	-0.00208643	0.0793657	0.0310035			0.766	-0.00972257	0.0959107	0.0704569	0.0895472	0.115001	0.12391			0.766	0.347903	0.290632	0.221907			0.766	0.08446	0.22827	0.82007			0.766
	0.767	0.0666388	0.0399123	-0.0911747	0.061548	-0.0619029	0.0539119			0.767	0.0920926	0.251179	0.233361	0.0704569	0.129001	0.0768203			0.767	-0.00463181	0.0882745	0.00300433	0.0131859	0.0730023	0.0424577			0.767	-0.00463181	0.0882745	0.0768203	0.094638	0.115001	0.130273			0.767	0.350449	0.276633	0.219362			0.767	0.08955	0.22445	0.82389			0.767
	0.768	0.0628207	0.0195493	-0.0911747	0.0679115	-0.0428125	0.0462758			0.768	0.0908199	0.243543	0.224452	0.061548	0.135364	0.074275			0.768	-0.016086	0.0895472	0.0131859	0.0182766	0.0640934	0.0233674			0.768	-0.016086	0.0895472	0.074275	0.0920926	0.113728	0.12391			0.768	0.344085	0.280451	0.196453			0.768	0.08064	0.16082	0.80225			0.768
	0.769	0.0768203	0.0360943	-0.0822659	0.0730023	-0.0377217	0.0602754			0.769	0.0793657	0.253724	0.24227	0.0602754	0.146818	0.0717296			0.769	-0.0148133	0.0857292	0.0068224	0.0182766	0.078093	0.0220947			0.769	-0.0148133	0.0857292	0.0857292	0.0806384	0.149364	0.132819			0.769	0.340267	0.288087	0.205362			0.769	0.09846	0.15318	0.8188			0.769
	0.77	0.0628207	0.0157312	-0.0771751	0.0602754	-0.0580848	0.0539119			0.77	0.0793657	0.252451	0.243543	0.0717296	0.140455	0.0564573			0.77	-0.0122679	0.0768203	0.0195493	0.00300433	0.0870019	0.0437304			0.77	-0.0122679	0.0768203	0.0730023	0.0933653	0.125183	0.111183			0.77	0.333904	0.281723	0.229543			0.77	0.08955	0.10864	0.81116			0.77
	0.771	0.0666388	0.0170039	-0.086084	0.0704569	-0.0428125	0.0602754			0.771	0.0908199	0.252451	0.225725	0.078093	0.137909	0.0628207			0.771	-0.00717719	0.106092	0.00936778	0.0182766	0.0831838	0.0322762			0.771	-0.00717719	0.106092	0.0806384	0.0895472	0.135364	0.0984561			0.771	0.336449	0.274087	0.210453			0.771	0.10482	0.12518	0.76153			0.771
	0.772	0.061548	0.0233674	-0.0848113	0.0666388	-0.0440852	0.0488212			0.772	0.0870019	0.252451	0.235906	0.0628207	0.134091	0.0691842			0.772	-0.0313583	0.0870019	0.00936778	0.0144585	0.0831838	0.0475485			0.772	-0.0313583	0.0870019	0.0768203	0.0793657	0.122637	0.129001			0.772	0.336449	0.288087	0.212998			0.772	0.07809	0.12264	0.7208			0.772
	0.773	0.0666388	0.0195493	-0.0835386	0.0640934	-0.052994	0.0526392			0.773	0.0857292	0.244815	0.24227	0.061548	0.143	0.074275			0.773	-0.0173587	0.0908199	0.0170039	0.0271854	0.0831838	0.0182766			0.773	-0.0173587	0.0908199	0.0920926	0.0933653	0.146818	0.115001			0.773	0.333904	0.276633	0.200271			0.773	0.09209	0.15445	0.66608			0.773
	0.774	0.0590027	0.0271854	-0.0720844	0.0666388	-0.0555394	0.0526392			0.774	0.0920926	0.253724	0.234634	0.0551846	0.151909	0.0628207			0.774	-0.0109953	0.0819111	0.0271854	0.00936778	0.0819111	0.0335489			0.774	-0.0109953	0.0819111	0.0704569	0.0831838	0.121365	0.131546			0.774	0.319904	0.263906	0.202817			0.774	0.09973	0.13791	0.66608			0.774
	0.775	0.0564573	0.0386396	-0.0797205	0.0653661	-0.0542667	0.0564573			0.775	0.094638	0.24227	0.229543	0.0755476	0.122637	0.0704569			0.775	-0.016086	0.0755476	0.00809509	0.0170039	0.0666388	0.0399123			0.775	-0.016086	0.0755476	0.0908199	0.0870019	0.143	0.116274			0.775	0.335176	0.263906	0.215543			0.775	0.09209	0.171	0.68517			0.775
	0.776	0.0539119	0.0131859	-0.0797205	0.0691842	-0.0440852	0.0399123			0.776	0.0831838	0.234634	0.239725	0.0704569	0.127728	0.0717296			0.776	-0.0224495	0.0844565	0.00173164	0.00427702	0.0882745	0.0284581			0.776	-0.0224495	0.0844565	0.0844565	0.0971834	0.130273	0.121365			0.776	0.331358	0.280451	0.179908			0.776	0.08573	0.20282	0.68389			0.776
	0.777	0.05773	0.0386396	-0.0835386	0.0640934	-0.049176	0.0386396			0.777	0.078093	0.247361	0.226998	0.0450031	0.144273	0.0653661			0.777	-0.00335912	0.0933653	0.0106405	0.0119132	0.0640934	0.0475485			0.777	-0.00335912	0.0933653	0.0895472	0.0933653	0.150636	0.115001			0.777	0.340267	0.26136	0.191362			0.777	0.08827	0.21936	0.65844			0.777
	0.778	0.074275	0.020822	-0.089902	0.0679115	-0.0402671	0.0539119			0.778	0.0793657	0.252451	0.225725	0.0679115	0.148091	0.0704569			0.778	-0.0389944	0.094638	0.0131859	0.0220947	0.0857292	0.0348216			0.778	-0.0389944	0.094638	0.0971834	0.0844565	0.140455	0.0984561			0.778	0.34154	0.260088	0.198998			0.778	0.08573	0.24227	0.68898			0.778
	0.779	0.041185	0.0195493	-0.0835386	0.0679115	-0.0593575	0.0539119			0.779	0.0870019	0.237179	0.24227	0.0666388	0.126455	0.0653661			0.779	-0.0135406	0.0870019	0.0182766	0.0144585	0.0870019	0.0310035			0.779	-0.0135406	0.0870019	0.0882745	0.0819111	0.154454	0.118819			0.779	0.332631	0.260088	0.202817			0.779	0.08318	0.25118	0.70935			0.779
	0.78	0.0488212	0.0233674	-0.073357	0.0679115	-0.0351764	0.0666388			0.78	0.0831838	0.24227	0.232089	0.0513665	0.141728	0.0730023			0.78	-0.0377217	0.0933653	0.0246401	0.0271854	0.0870019	0.0322762			0.78	-0.0377217	0.0933653	0.0959107	0.074275	0.148091	0.117546			0.78	0.316086	0.26136	0.187544			0.78	0.07682	0.26772	0.73735			0.78
	0.781	0.0526392	0.020822	-0.0873566	0.0488212	-0.049176	0.0488212			0.781	0.0768203	0.240997	0.24227	0.0513665	0.132819	0.0666388			0.781	-0.00208643	0.094638	0.00809509	0.0195493	0.0691842	0.0348216			0.781	-0.00208643	0.094638	0.10991	0.0984561	0.151909	0.132819			0.781	0.321177	0.251179	0.221907			0.781	0.10482	0.27154	0.77553			0.781
	0.782	0.0666388	0.0360943	-0.0873566	0.0666388	-0.0351764	0.0462758			0.782	0.0768203	0.24227	0.229543	0.0691842	0.141728	0.0679115			0.782	-0.00208643	0.0831838	0.0157312	-0.00208643	0.0870019	0.0284581			0.782	-0.00208643	0.0831838	0.0959107	0.0882745	0.157	0.112456			0.782	0.313541	0.266451	0.202817			0.782	0.09591	0.24609	0.80734			0.782
	0.783	0.0653661	0.0170039	-0.0720844	0.061548	-0.032631	0.0691842			0.783	0.0730023	0.234634	0.238452	0.0640934	0.12391	0.0717296			0.783	-0.00717719	0.094638	0.0157312	0.00809509	0.0691842	0.0310035			0.783	-0.00717719	0.094638	0.0882745	0.0831838	0.157	0.121365			0.783	0.322449	0.260088	0.197726			0.783	0.09337	0.21427	0.82898			0.783
	0.784	0.0653661	0.0399123	-0.0771751	0.0666388	-0.0504486	0.0335489			0.784	0.0831838	0.246088	0.220634	0.0450031	0.139182	0.0551846			0.784	0.00554971	0.0844565	0.0131859	-0.000813741	0.0793657	0.0322762			0.784	0.00554971	0.0844565	0.0997288	0.0870019	0.160818	0.126455			0.784	0.313541	0.258815	0.196453			0.784	0.09464	0.17482	0.81753			0.784
	0.785	0.0793657	0.0144585	-0.0784478	0.0691842	-0.0466306	0.041185			0.785	0.0793657	0.237179	0.215543	0.0704569	0.137909	0.05773			0.785	-0.0148133	0.094638	0.0106405	0.0348216	0.0793657	0.0157312			0.785	-0.0148133	0.094638	0.101001	0.0730023	0.149364	0.132819			0.785	0.313541	0.253724	0.191362			0.785	0.09337	0.19009	0.80353			0.785
	0.786	0.041185	0.020822	-0.0746297	0.0666388	-0.0428125	0.0500939			0.786	0.0768203	0.232089	0.224452	0.0717296	0.125183	0.0602754			0.786	-0.0173587	0.0793657	0.0106405	0.0233674	0.0755476	0.0182766			0.786	-0.0173587	0.0793657	0.111183	0.0933653	0.150636	0.122637			0.786	0.324995	0.248633	0.195181			0.786	0.08446	0.15064	0.80225			0.786
	0.787	0.061548	0.0360943	-0.0784478	0.05773	-0.049176	0.0424577			0.787	0.0806384	0.235906	0.251179	0.0602754	0.131546	0.0653661			0.787	-0.0199041	0.0844565	0.0106405	0.00554971	0.0819111	0.0310035			0.787	-0.0199041	0.0844565	0.111183	0.0971834	0.160818	0.10991			0.787	0.317359	0.270269	0.174817			0.787	0.10355	0.11627	0.78571			0.787
	0.788	0.0666388	0.0271854	-0.073357	0.074275	-0.0288129	0.0526392			0.788	0.0895472	0.226998	0.234634	0.05773	0.132819	0.0590027			0.788	-0.00335912	0.094638	0.0131859	0.000458949	0.0933653	0.0310035			0.788	-0.00335912	0.094638	0.101001	0.074275	0.165909	0.134091			0.788	0.314813	0.240997	0.212998			0.788	0.08446	0.12773	0.7768			0.788
	0.789	0.061548	0.0233674	-0.069539	0.0691842	-0.032631	0.0526392			0.789	0.0870019	0.235906	0.229543	0.0513665	0.129001	0.0755476			0.789	-0.0199041	0.0908199	0.0246401	0.0182766	0.094638	0.0271854			0.789	-0.0199041	0.0908199	0.115001	0.0908199	0.160818	0.112456			0.789	0.300814	0.243543	0.195181			0.789	0.11246	0.11627	0.72207			0.789
	0.79	0.0539119	0.0144585	-0.0809932	0.0640934	-0.0415398	0.037367			0.79	0.0819111	0.221907	0.230816	0.078093	0.129001	0.0640934			0.79	-0.016086	0.078093	0.00809509	0.0246401	0.0908199	0.0119132			0.79	-0.016086	0.078093	0.115001	0.0793657	0.145546	0.127728			0.79	0.309723	0.262633	0.181181			0.79	0.09337	0.13918	0.7068			0.79
	0.791	0.0539119	0.0271854	-0.0631755	0.0640934	-0.0415398	0.0462758			0.791	0.078093	0.232089	0.220634	0.0539119	0.131546	0.0666388			0.791	-0.00208643	0.102274	0.0119132	0.00936778	0.0793657	0.0144585			0.791	-0.00208643	0.102274	0.104819	0.0920926	0.167181	0.129001			0.791	0.309723	0.258815	0.186272			0.791	0.10736	0.17991	0.67626			0.791
	0.792	0.05773	0.0310035	-0.0835386	0.0539119	-0.032631	0.0590027			0.792	0.0908199	0.230816	0.229543	0.0437304	0.137909	0.0526392			0.792	-0.0262675	0.0895472	0.0182766	0.0182766	0.0844565	0.0220947			0.792	-0.0262675	0.0895472	0.115001	0.0870019	0.174817	0.10991			0.792	0.285541	0.230816	0.183726			0.792	0.06918	0.22827	0.66608			0.792
	0.793	0.0590027	0.0220947	-0.0759024	0.0590027	-0.0313583	0.0564573			0.793	0.0831838	0.226998	0.211725	0.061548	0.12391	0.074275			0.793	-0.0237222	0.0806384	0.0157312	0.0233674	0.0768203	0.0284581			0.793	-0.0237222	0.0806384	0.106092	0.0844565	0.174817	0.10991			0.793	0.303359	0.254997	0.186272			0.793	0.06791	0.24482	0.65462			0.793
	0.794	0.05773	0.0170039	-0.105174	0.0666388	-0.0517213	0.0437304			0.794	0.0768203	0.219362	0.211725	0.0704569	0.122637	0.0793657			0.794	-0.016086	0.0895472	0.00809509	0.0322762	0.0806384	0.0170039			0.794	-0.016086	0.0895472	0.108638	0.0819111	0.158273	0.134091			0.794	0.323722	0.249906	0.191362			0.794	0.10609	0.24736	0.68771			0.794
	0.795	0.0539119	0.0144585	-0.0708117	0.0691842	-0.0389944	0.0564573			0.795	0.074275	0.22827	0.220634	0.0564573	0.134091	0.078093			0.795	-0.016086	0.0984561	0.0119132	0.0233674	0.0959107	0.0322762			0.795	-0.016086	0.0984561	0.10991	0.0870019	0.167181	0.130273			0.795	0.290632	0.229543	0.181181			0.795	0.09718	0.27663	0.70426			0.795
	0.796	0.0475485	0.0144585	-0.0619029	0.0717296	-0.0377217	0.0424577			0.796	0.078093	0.226998	0.240997	0.0602754	0.10991	0.0564573			0.796	-0.0237222	0.0806384	0.0157312	0.0157312	0.0882745	0.0119132			0.796	-0.0237222	0.0806384	0.115001	0.0895472	0.172272	0.130273			0.796	0.300814	0.239725	0.179908			0.796	0.08318	0.28172	0.7208			0.796
	0.797	0.0437304	0.0233674	-0.0682663	0.0628207	-0.0466306	0.0462758			0.797	0.0768203	0.220634	0.232089	0.0590027	0.130273	0.0526392			0.797	-0.0199041	0.0908199	0.000458949	0.0144585	0.0844565	0.0182766			0.797	-0.0199041	0.0908199	0.127728	0.0793657	0.159545	0.125183			0.797	0.302086	0.239725	0.19009			0.797	0.08827	0.27409	0.77425			0.797
	0.798	0.0539119	0.0119132	-0.0797205	0.05773	-0.0377217	0.0526392			0.798	0.0768203	0.221907	0.22318	0.0640934	0.126455	0.0513665			0.798	-0.0275402	0.094638	0.0106405	0.0195493	0.094638	-0.00335912			0.798	-0.0275402	0.094638	0.118819	0.0640934	0.177363	0.108638			0.798	0.29445	0.229543	0.173545			0.798	0.08827	0.28554	0.77425			0.798
	0.799	0.0475485	0.020822	-0.0759024	0.0564573	-0.0377217	0.0462758			0.799	0.0844565	0.215543	0.234634	0.0539119	0.115001	0.0793657			0.799	-0.0122679	0.0679115	0.0131859	0.0220947	0.0857292	0.0284581			0.799	-0.0122679	0.0679115	0.118819	0.0844565	0.173545	0.120092			0.799	0.300814	0.248633	0.192635			0.799	0.09082	0.26263	0.80353			0.799
	0.8	0.0602754	0.0233674	-0.0784478	0.0551846	-0.0300856	0.0399123			0.8	0.0806384	0.215543	0.226998	0.0526392	0.107365	0.0488212			0.8	-0.0237222	0.0793657	0.0157312	0.0106405	0.0882745	0.020822			0.8	-0.0237222	0.0793657	0.0895472	0.0959107	0.151909	0.134091			0.8	0.295723	0.226998	0.191362			0.8	0.08827	0.20154	0.82643			0.8
	0.801	0.0526392	0.0182766	-0.0644482	0.0564573	-0.0428125	0.041185			0.801	0.0768203	0.210453	0.22318	0.061548	0.136637	0.05773			0.801	-0.00844988	0.0997288	0.0195493	0.0259127	0.0691842	0.0386396			0.801	-0.00844988	0.0997288	0.0984561	0.0933653	0.167181	0.12391			0.801	0.288087	0.229543	0.168454			0.801	0.09464	0.15573	0.82643			0.801
	0.802	0.0590027	0.0182766	-0.073357	0.0640934	-0.032631	0.0564573			0.802	0.0793657	0.219362	0.237179	0.041185	0.115001	0.0717296			0.802	-0.00844988	0.0870019	0.0182766	0.0284581	0.0908199	0.0284581			0.802	-0.00844988	0.0870019	0.0920926	0.0997288	0.168454	0.117546			0.802	0.286814	0.24227	0.16209			0.802	0.09464	0.12264	0.80989			0.802
	0.803	0.0500939	0.0182766	-0.0784478	0.0526392	-0.0377217	0.0271854			0.803	0.0882745	0.214271	0.205362	0.0437304	0.118819	0.0437304			0.803	-0.0224495	0.0997288	0.0220947	0.0195493	0.101001	0.0259127			0.803	-0.0224495	0.0997288	0.0997288	0.0882745	0.168454	0.129001			0.803	0.296996	0.224452	0.17609			0.803	0.09718	0.10736	0.77935			0.803
	0.804	0.0564573	0.0144585	-0.0580848	0.0704569	-0.0440852	0.0322762			0.804	0.0755476	0.219362	0.221907	0.0602754	0.117546	0.0640934			0.804	-0.0249948	0.078093	0.020822	0.0310035	0.0895472	0.0157312			0.804	-0.0249948	0.078093	0.107365	0.0882745	0.159545	0.127728			0.804	0.299541	0.232089	0.169727			0.804	0.10864	0.11755	0.75389			0.804
	0.805	0.0500939	0.0170039	-0.069539	0.0666388	-0.0313583	0.0437304			0.805	0.0819111	0.212998	0.218089	0.0475485	0.121365	0.0640934			0.805	-0.0148133	0.0730023	0.0271854	0.0310035	0.0844565	0.0144585			0.805	-0.0148133	0.0730023	0.0971834	0.0730023	0.168454	0.127728			0.805	0.29445	0.233361	0.173545			0.805	0.07937	0.10991	0.70553			0.805
	0.806	0.0640934	0.0220947	-0.0644482	0.061548	-0.0351764	0.05773			0.806	0.0819111	0.206635	0.218089	0.0386396	0.115001	0.0551846			0.806	-0.0211768	0.0870019	0.0068224	0.00809509	0.0806384	0.020822			0.806	-0.0211768	0.0870019	0.0882745	0.101001	0.172272	0.122637			0.806	0.285541	0.243543	0.160818			0.806	0.09718	0.09846	0.67753			0.806
	0.807	0.0564573	0.0233674	-0.0682663	0.0640934	-0.0377217	0.0360943			0.807	0.0870019	0.198998	0.205362	0.05773	0.104819	0.0564573			0.807	-0.0275402	0.0844565	0.0246401	0.0157312	0.0793657	0.0106405			0.807	-0.0275402	0.0844565	0.111183	0.078093	0.170999	0.122637			0.807	0.280451	0.220634	0.174817			0.807	0.08191	0.12773	0.6928			0.807
	0.808	0.0564573	0.0182766	-0.0644482	0.0691842	-0.0262675	0.0386396			0.808	0.0831838	0.20918	0.226998	0.0640934	0.134091	0.0602754			0.808	-0.0173587	0.074275	0.00936778	0.0195493	0.094638	0.0131859			0.808	-0.0173587	0.074275	0.0857292	0.107365	0.141728	0.129001			0.808	0.267724	0.20918	0.170999			0.808	0.09337	0.129	0.66353			0.808
	0.809	0.05773	0.0119132	-0.0746297	0.0666388	-0.0351764	0.0526392			0.809	0.0793657	0.207907	0.216816	0.0526392	0.101001	0.0679115			0.809	-0.0135406	0.0793657	0.0144585	0.020822	0.0768203	0.0144585			0.809	-0.0135406	0.0793657	0.094638	0.0908199	0.160818	0.132819			0.809	0.270269	0.239725	0.157			0.809	0.09973	0.19645	0.63808			0.809
	0.81	0.041185	0.0195493	-0.0580848	0.05773	-0.0402671	0.0590027			0.81	0.0882745	0.200271	0.215543	0.0424577	0.131546	0.0628207			0.81	-0.0186314	0.074275	0.00809509	0.0182766	0.0882745	0.00936778			0.81	-0.0186314	0.074275	0.0819111	0.103547	0.154454	0.125183			0.81	0.274087	0.212998	0.172272			0.81	0.087	0.24482	0.65844			0.81
	0.811	0.0386396	0.0360943	-0.073357	0.0462758	-0.0249948	0.0475485			0.811	0.0844565	0.202817	0.20918	0.0564573	0.0971834	0.0551846			0.811	-0.0109953	0.0717296	0.0119132	0.0131859	0.0793657	0.0131859			0.811	-0.0109953	0.0717296	0.0768203	0.102274	0.150636	0.126455			0.811	0.277905	0.207907	0.17609			0.811	0.09464	0.25754	0.65971			0.811
	0.812	0.0539119	0.041185	-0.052994	0.074275	-0.0351764	0.0602754			0.812	0.0908199	0.200271	0.215543	0.0704569	0.12391	0.0500939			0.812	-0.0186314	0.0730023	0.00809509	0.0271854	0.0933653	0.0271854			0.812	-0.0186314	0.0730023	0.0768203	0.0908199	0.16209	0.116274			0.812	0.276633	0.229543	0.164636			0.812	0.09846	0.27409	0.69153			0.812
	0.813	0.0551846	0.0182766	-0.0631755	0.0691842	-0.032631	0.0475485			0.813	0.0844565	0.192635	0.200271	0.0386396	0.115001	0.0640934			0.813	-0.0109953	0.0806384	0.0220947	0.0144585	0.0984561	0.0068224			0.813	-0.0109953	0.0806384	0.0691842	0.10991	0.155727	0.130273			0.813	0.284269	0.214271	0.157			0.813	0.09464	0.25245	0.7488			0.813
	0.814	0.0564573	0.0233674	-0.0759024	0.05773	-0.0351764	0.0462758			0.814	0.0933653	0.195181	0.219362	0.0513665	0.127728	0.0322762			0.814	-0.0148133	0.0806384	0.00809509	0.0246401	0.0819111	0.0182766			0.814	-0.0148133	0.0806384	0.0539119	0.103547	0.132819	0.129001			0.814	0.277905	0.212998	0.146818			0.814	0.08573	0.26772	0.77553			0.814
	0.815	0.0488212	0.0259127	-0.0568121	0.0755476	-0.0237222	0.0399123			0.815	0.0908199	0.182454	0.221907	0.0640934	0.0997288	0.0564573			0.815	-0.0122679	0.0819111	0.0182766	0.00809509	0.0895472	0.000458949			0.815	-0.0122679	0.0819111	0.0488212	0.094638	0.126455	0.130273			0.815	0.266451	0.225725	0.160818			0.815	0.09337	0.25372	0.78189			0.815
	0.816	0.0322762	0.0195493	-0.0682663	0.0551846	-0.0122679	0.0500939			0.816	0.0806384	0.184999	0.196453	0.041185	0.101001	0.0424577			0.816	-0.032631	0.0819111	0.0259127	0.0131859	0.0984561	0.0144585			0.816	-0.032631	0.0819111	0.0564573	0.094638	0.132819	0.135364			0.816	0.27536	0.206635	0.139182			0.816	0.10355	0.23845	0.8188			0.816
	0.817	0.0564573	0.0157312	-0.052994	0.0704569	-0.0262675	0.0437304			0.817	0.0895472	0.182454	0.196453	0.0462758	0.104819	0.0628207			0.817	-0.0224495	0.0730023	0.00554971	0.0182766	0.0806384	0.00809509			0.817	-0.0224495	0.0730023	0.0564573	0.0971834	0.120092	0.126455			0.817	0.267724	0.202817	0.150636			0.817	0.09464	0.21045	0.79207			0.817
	0.818	0.0348216	0.0220947	-0.0720844	0.0526392	-0.0428125	0.0335489			0.818	0.0819111	0.187544	0.202817	0.0462758	0.10991	0.0450031			0.818	-0.0275402	0.0704569	0.0131859	0.0322762	0.0844565	0.00809509			0.818	-0.0275402	0.0704569	0.041185	0.0793657	0.113728	0.131546			0.818	0.276633	0.22827	0.159545			0.818	0.09082	0.16845	0.8188			0.818
	0.819	0.0590027	0.0157312	-0.0682663	0.0551846	-0.0199041	0.0513665			0.819	0.0806384	0.178636	0.201544	0.0462758	0.117546	0.0399123			0.819	-0.0173587	0.0793657	0.0220947	0.0195493	0.0908199	0.0157312			0.819	-0.0173587	0.0793657	0.0335489	0.0984561	0.0933653	0.120092			0.819	0.270269	0.197726	0.139182			0.819	0.09718	0.13791	0.81244			0.819
	0.82	0.0475485	0.020822	-0.0644482	0.0539119	-0.0224495	0.0488212			0.82	0.0819111	0.19009	0.191362	0.037367	0.0971834	0.0437304			0.82	-0.0173587	0.074275	0.00173164	0.0386396	0.0831838	0.0131859			0.82	-0.0173587	0.074275	0.0297308	0.0882745	0.0997288	0.127728			0.82	0.253724	0.200271	0.155727			0.82	0.09464	0.12518	0.77425			0.82
	0.821	0.0462758	0.0233674	-0.0759024	0.0590027	-0.0237222	0.0513665			0.821	0.0831838	0.173545	0.20918	0.0513665	0.10991	0.0437304			0.821	-0.0199041	0.0564573	-0.00208643	0.0195493	0.0933653	0.00554971			0.821	-0.0199041	0.0564573	0.0233674	0.0933653	0.102274	0.116274			0.821	0.270269	0.197726	0.150636			0.821	0.09591	0.12264	0.7768			0.821
	0.822	0.0564573	0.0170039	-0.0606302	0.0666388	-0.0249948	0.0360943			0.822	0.0908199	0.17609	0.187544	0.0462758	0.111183	0.0488212			0.822	-0.0275402	0.0768203	0.0259127	0.0131859	0.094638	0.0144585			0.822	-0.0275402	0.0768203	0.00300433	0.101001	0.078093	0.130273			0.822	0.252451	0.196453	0.154454			0.822	0.08827	0.12009	0.70553			0.822
	0.823	0.0386396	0.0233674	-0.0771751	0.0590027	-0.0351764	0.0399123			0.823	0.0793657	0.168454	0.206635	0.0399123	0.107365	0.0386396			0.823	-0.0402671	0.0870019	0.0119132	0.00554971	0.0768203	0.0119132			0.823	-0.0402671	0.0870019	0.0157312	0.0844565	0.078093	0.117546			0.823	0.257542	0.200271	0.145546			0.823	0.09846	0.12264	0.67371			0.823
	0.824	0.0450031	0.0144585	-0.0644482	0.0488212	-0.032631	0.0488212			0.824	0.094638	0.177363	0.200271	0.0297308	0.0984561	0.0360943			0.824	-0.00844988	0.078093	-0.00208643	0.0182766	0.0793657	0.00809509			0.824	-0.00844988	0.078093	0.0157312	0.0831838	0.0653661	0.118819			0.824	0.249906	0.196453	0.143			0.824	0.10227	0.14555	0.66989			0.824
	0.825	0.0488212	0.0106405	-0.0657209	0.0475485	-0.016086	0.0322762			0.825	0.0895472	0.174817	0.184999	0.0424577	0.10991	0.0233674			0.825	-0.0109953	0.0806384	0.0119132	0.00936778	0.0704569	0.0170039			0.825	-0.0109953	0.0806384	0.00427702	0.106092	0.0628207	0.12391			0.825	0.247361	0.19009	0.131546			0.825	0.09846	0.15445	0.63935			0.825
	0.826	0.0437304	0.0157312	-0.0580848	0.0730023	-0.0249948	0.041185			0.826	0.0819111	0.169727	0.19009	0.0602754	0.116274	0.037367			0.826	-0.0199041	0.0730023	0.0144585	0.0233674	0.0806384	0.0068224			0.826	-0.0199041	0.0730023	-0.00844988	0.0920926	0.0539119	0.125183			0.826	0.257542	0.192635	0.130273			0.826	0.10355	0.20154	0.64953			0.826
	0.827	0.0526392	0.0157312	-0.0619029	0.0526392	-0.0237222	0.0271854			0.827	0.0768203	0.17609	0.19009	0.0386396	0.0870019	0.0513665			0.827	-0.00463181	0.0653661	0.020822	0.0119132	0.0844565	0.000458949			0.827	-0.00463181	0.0653661	-0.00844988	0.0882745	0.0551846	0.108638			0.827	0.260088	0.192635	0.120092			0.827	0.09337	0.21045	0.65717			0.827
	0.828	0.037367	0.0322762	-0.069539	0.0450031	-0.0237222	0.041185			0.828	0.0755476	0.16209	0.192635	0.0246401	0.107365	0.0284581			0.828	-0.0173587	0.0882745	0.00300433	0.00427702	0.0844565	0.0131859			0.828	-0.0173587	0.0882745	-0.0109953	0.108638	0.0157312	0.132819			0.828	0.252451	0.191362	0.134091			0.828	0.08955	0.25118	0.65717			0.828
	0.829	0.0437304	0.00936778	-0.0669936	0.0539119	-0.000813741	0.0322762			0.829	0.0653661	0.163363	0.191362	0.0462758	0.0831838	0.0297308			0.829	-0.0237222	0.0831838	0.0195493	0.00936778	0.0819111	0.0119132			0.829	-0.0237222	0.0831838	-0.0109953	0.0882745	0.0424577	0.113728			0.829	0.235906	0.179908	0.115001			0.829	0.08827	0.26263	0.69153			0.829
	0.83	0.0386396	0.0157312	-0.0619029	0.0513665	-0.0249948	0.0259127			0.83	0.0590027	0.16209	0.178636	0.0488212	0.102274	0.0386396			0.83	-0.0249948	0.0755476	0.00809509	0.00427702	0.0806384	0.0170039			0.83	-0.0249948	0.0755476	-0.0199041	0.0997288	0.0386396	0.12391			0.83	0.244815	0.182454	0.129001			0.83	0.10355	0.25118	0.7348			0.83
	0.831	0.0437304	0.0322762	-0.0606302	0.0488212	-0.0186314	0.0437304			0.831	0.0551846	0.167181	0.181181	0.0475485	0.0984561	0.0424577			0.831	-0.0148133	0.0793657	-0.00208643	0.0195493	0.0857292	-0.00463181			0.831	-0.0148133	0.0793657	-0.0199041	0.0971834	0.0182766	0.131546			0.831	0.254997	0.19009	0.115001			0.831	0.087	0.24227	0.73989			0.831
	0.832	0.0475485	0.0144585	-0.0682663	0.0488212	-0.0224495	0.037367			0.832	0.0488212	0.167181	0.163363	0.041185	0.111183	0.0513665			0.832	-0.0211768	0.0844565	0.0246401	0.0119132	0.0870019	0.0246401			0.832	-0.0211768	0.0844565	-0.0186314	0.0806384	0.0119132	0.102274			0.832	0.249906	0.182454	0.121365			0.832	0.09082	0.24609	0.79844			0.832
	0.833	0.0450031	0.0119132	-0.0669936	0.0539119	-0.0249948	0.0424577			0.833	0.05773	0.16209	0.181181	0.041185	0.10991	0.0360943			0.833	-0.0237222	0.0691842	0.00427702	-0.000813741	0.0793657	0.00173164			0.833	-0.0237222	0.0691842	-0.0428125	0.102274	-0.0122679	0.117546			0.833	0.226998	0.183726	0.118819			0.833	0.09718	0.17227	0.80989			0.833
	0.834	0.041185	0.0246401	-0.0644482	0.0437304	-0.0199041	0.0360943			0.834	0.0475485	0.153182	0.188817	0.0399123	0.104819	0.0348216			0.834	-0.0275402	0.0730023	0.0182766	0.020822	0.0857292	0.0170039			0.834	-0.0275402	0.0730023	-0.0199041	0.0895472	0.0131859	0.116274			0.834	0.229543	0.17609	0.112456			0.834	0.08955	0.15827	0.79971			0.834
	0.835	0.0475485	0.00936778	-0.0580848	0.0462758	-0.0122679	0.0284581			0.835	0.0386396	0.158273	0.167181	0.0360943	0.107365	0.0386396			0.835	-0.0186314	0.0895472	0.00554971	-0.00844988	0.0666388	0.00554971			0.835	-0.0186314	0.0895472	-0.0339037	0.101001	0.0068224	0.115001			0.835	0.248633	0.178636	0.120092			0.835	0.09082	0.11373	0.79589			0.835
	0.836	0.0386396	0.00936778	-0.0568121	0.0475485	-0.0211768	0.0399123			0.836	0.0475485	0.16209	0.174817	0.0386396	0.103547	0.0220947			0.836	-0.0313583	0.0768203	0.00936778	0.00300433	0.0870019	-0.00208643			0.836	-0.0313583	0.0768203	-0.0504486	0.0831838	0.00427702	0.10991			0.836	0.237179	0.165909	0.118819			0.836	0.09973	0.10991	0.74498			0.836
	0.837	0.0450031	0.0144585	-0.0835386	0.0539119	-0.0199041	0.0399123			0.837	0.0437304	0.157	0.191362	0.0475485	0.102274	0.0462758			0.837	-0.0211768	0.0806384	0.0157312	0.0131859	0.0691842	0.00936778			0.837	-0.0211768	0.0806384	-0.0351764	0.0768203	-0.00844988	0.113728			0.837	0.226998	0.178636	0.117546			0.837	0.10864	0.06409	0.76153			0.837
	0.838	0.0475485	0.0462758	-0.0657209	0.0437304	-0.0173587	0.0144585			0.838	0.0475485	0.151909	0.159545	0.0513665	0.0997288	0.0233674			0.838	-0.0224495	0.0640934	0.000458949	0.0144585	0.0806384	0.020822			0.838	-0.0224495	0.0640934	-0.049176	0.0870019	-0.0109953	0.106092			0.838	0.251179	0.170999	0.120092			0.838	0.087	0.07555	0.71698			0.838
	0.839	0.0424577	0.0170039	-0.0759024	0.0360943	-0.0300856	0.0246401			0.839	0.0399123	0.149364	0.181181	0.0335489	0.130273	0.0297308			0.839	-0.016086	0.0730023	0.0144585	0.0106405	0.0908199	0.0182766			0.839	-0.016086	0.0730023	-0.0542667	0.0920926	-0.000813741	0.10991			0.839	0.216816	0.163363	0.107365			0.839	0.10227	0.087	0.67244			0.839
	0.84	0.0488212	0.0144585	-0.073357	0.0602754	-0.0249948	0.0233674			0.84	0.0526392	0.154454	0.177363	0.0271854	0.122637	0.0335489			0.84	-0.0237222	0.0920926	0.020822	0.00173164	0.0857292	0.0271854			0.84	-0.0237222	0.0920926	-0.0619029	0.0895472	-0.0186314	0.121365			0.84	0.202817	0.184999	0.125183			0.84	0.09464	0.087	0.66862			0.84
	0.841	0.0399123	0.0119132	-0.0580848	0.0488212	-0.00844988	0.0271854			0.841	0.0450031	0.154454	0.169727	0.0348216	0.112456	0.0335489			0.841	-0.0224495	0.0768203	0.0119132	0.0195493	0.0882745	0.0119132			0.841	-0.0224495	0.0768203	-0.0453579	0.0857292	-0.0275402	0.113728			0.841	0.237179	0.165909	0.107365			0.841	0.09591	0.12646	0.62917			0.841
	0.842	0.041185	0.0348216	-0.0682663	0.0500939	-0.0224495	0.0246401			0.842	0.0437304	0.150636	0.164636	0.05773	0.0997288	0.0322762			0.842	-0.0148133	0.0831838	0.0119132	0.0157312	0.0831838	0.0106405			0.842	-0.0148133	0.0831838	-0.0606302	0.0819111	-0.0300856	0.113728			0.842	0.243543	0.170999	0.121365			0.842	0.09718	0.17991	0.62153			0.842
	0.843	0.0399123	0.020822	-0.0682663	0.0348216	-0.00844988	0.0259127			0.843	0.0500939	0.144273	0.207907	0.0590027	0.115001	0.041185			0.843	-0.0109953	0.0755476	0.0144585	0.0144585	0.078093	0.0259127			0.843	-0.0109953	0.0755476	-0.0746297	0.0717296	-0.0415398	0.10991			0.843	0.225725	0.168454	0.127728			0.843	0.08573	0.20154	0.65208			0.843
	0.844	0.0259127	0.0233674	-0.0771751	0.0488212	-0.0211768	0.0220947			0.844	0.0488212	0.157	0.184999	0.0399123	0.0984561	0.0271854			0.844	-0.0135406	0.0730023	0.0157312	0.0182766	0.0768203	0.0131859			0.844	-0.0135406	0.0730023	-0.0886293	0.078093	-0.016086	0.113728			0.844	0.215543	0.170999	0.12391			0.844	0.07682	0.22573	0.63553			0.844
	0.845	0.0322762	0.00554971	-0.0593575	0.05773	-0.0148133	0.0450031			0.845	0.0500939	0.148091	0.188817	0.0322762	0.112456	0.0271854			0.845	-0.0300856	0.0768203	0.00809509	0.00809509	0.078093	0.0144585			0.845	-0.0300856	0.0768203	-0.0809932	0.0870019	-0.0224495	0.0971834			0.845	0.232089	0.177363	0.118819			0.845	0.09591	0.23718	0.67753			0.845
	0.846	0.0475485	0.00936778	-0.0593575	0.0360943	-0.0186314	0.0284581			0.846	0.0513665	0.151909	0.183726	0.0386396	0.106092	0.0348216			0.846	-0.0211768	0.0806384	0.0131859	-0.000813741	0.0806384	0.00936778			0.846	-0.0211768	0.0806384	-0.0848113	0.074275	-0.0389944	0.120092			0.846	0.235906	0.146818	0.117546			0.846	0.09973	0.23082	0.69789			0.846
	0.847	0.0360943	0.0195493	-0.052994	0.0462758	-0.00463181	0.0297308			0.847	0.0488212	0.151909	0.16209	0.0399123	0.126455	0.0322762			0.847	-0.000813741	0.0768203	0.00809509	0.00936778	0.0819111	0.020822			0.847	-0.000813741	0.0768203	-0.0682663	0.0806384	-0.032631	0.108638			0.847	0.229543	0.17609	0.102274			0.847	0.09846	0.241	0.72844			0.847
	0.848	0.0322762	0.0144585	-0.0631755	0.0322762	-0.0122679	0.0195493			0.848	0.0500939	0.145546	0.164636	0.0653661	0.122637	0.0360943			0.848	0.000458949	0.074275	0.0119132	0.0360943	0.101001	0.0259127			0.848	0.000458949	0.074275	-0.073357	0.0882745	-0.0288129	0.111183			0.848	0.233361	0.178636	0.120092			0.848	0.08573	0.22954	0.77044			0.848
	0.849	0.041185	0.0119132	-0.0657209	0.0462758	-0.0173587	0.0271854			0.849	0.0539119	0.150636	0.170999	0.0551846	0.106092	0.0539119			0.849	-0.0211768	0.0933653	0.0259127	0.0144585	0.0640934	0.0284581			0.849	-0.0211768	0.0933653	-0.069539	0.0679115	-0.0504486	0.10991			0.849	0.24227	0.167181	0.120092			0.849	0.08573	0.22191	0.76916			0.849
	0.85	0.0335489	0.0144585	-0.0631755	0.0437304	-0.0148133	0.0259127			0.85	0.0564573	0.148091	0.157	0.0450031	0.116274	0.0424577			0.85	-0.0173587	0.0730023	0.0182766	0.0144585	0.074275	0.0259127			0.85	-0.0173587	0.0730023	-0.0568121	0.0717296	-0.0237222	0.127728			0.85	0.225725	0.182454	0.125183			0.85	0.09718	0.18118	0.77553			0.85
	0.851	0.0335489	0.0233674	-0.0746297	0.0551846	-0.0224495	0.0182766			0.851	0.0526392	0.155727	0.170999	0.0475485	0.111183	0.0437304			0.851	-0.0109953	0.0793657	0.00300433	0.0195493	0.0717296	0.0310035			0.851	-0.0109953	0.0793657	-0.0644482	0.074275	-0.0479033	0.108638			0.851	0.224452	0.170999	0.106092			0.851	0.09973	0.11627	0.80607			0.851
	0.852	0.037367	0.0119132	-0.0644482	0.0360943	-0.00717719	0.0246401			0.852	0.05773	0.145546	0.168454	0.0513665	0.111183	0.0399123			0.852	-0.0148133	0.0844565	0.0182766	0.0170039	0.0908199	0.0271854			0.852	-0.0148133	0.0844565	-0.0720844	0.0971834	-0.032631	0.104819			0.852	0.225725	0.16209	0.116274			0.852	0.09591	0.10736	0.78953			0.852
	0.853	0.0386396	0.0106405	-0.0644482	0.0475485	-0.0186314	0.0220947			0.853	0.0539119	0.140455	0.172272	0.0488212	0.116274	0.0526392			0.853	-0.00717719	0.0844565	0.00173164	0.0195493	0.0844565	0.0182766			0.853	-0.00717719	0.0844565	-0.0644482	0.0882745	-0.0313583	0.106092			0.853	0.230816	0.170999	0.126455			0.853	0.09718	0.08064	0.75389			0.853
	0.854	0.0462758	0.0233674	-0.0619029	0.0488212	-0.00717719	0.0157312			0.854	0.0513665	0.139182	0.179908	0.0602754	0.115001	0.0399123			0.854	-0.00463181	0.0768203	0.00809509	0.0182766	0.061548	0.0386396			0.854	-0.00463181	0.0768203	-0.052994	0.0857292	-0.0300856	0.127728			0.854	0.221907	0.160818	0.12391			0.854	0.09464	0.08318	0.74626			0.854
	0.855	0.037367	0.00300433	-0.0669936	0.0437304	-0.0237222	0.0182766			0.855	0.05773	0.140455	0.164636	0.0386396	0.134091	0.0437304			0.855	-0.016086	0.0920926	0.0157312	0.0157312	0.0704569	0.0170039			0.855	-0.016086	0.0920926	-0.049176	0.0755476	-0.0199041	0.107365			0.855	0.225725	0.172272	0.130273			0.855	0.101	0.06791	0.68389			0.855
	0.856	0.0335489	0.0271854	-0.069539	0.0233674	-0.0148133	0.0271854			0.856	0.0602754	0.141728	0.164636	0.0475485	0.113728	0.0551846			0.856	-0.0109953	0.0679115	0.0182766	0.00300433	0.0666388	0.0144585			0.856	-0.0109953	0.0679115	-0.069539	0.0806384	-0.0351764	0.103547			0.856	0.232089	0.174817	0.12391			0.856	0.08446	0.07682	0.6648			0.856
	0.857	0.0271854	0.0106405	-0.0440852	0.0310035	-0.0148133	0.0182766			0.857	0.0653661	0.154454	0.17609	0.0424577	0.121365	0.0360943			0.857	-0.00208643	0.0933653	0.0157312	0.0157312	0.0768203	0.0322762			0.857	-0.00208643	0.0933653	-0.0428125	0.0793657	-0.0275402	0.111183			0.857	0.221907	0.17609	0.127728			0.857	0.09973	0.08955	0.66353			0.857
	0.858	0.0322762	0.0157312	-0.0631755	0.037367	-0.0237222	0.0271854			0.858	0.0590027	0.150636	0.181181	0.0488212	0.103547	0.0437304			0.858	0.000458949	0.0844565	0.0068224	0.0157312	0.0844565	0.0220947			0.858	0.000458949	0.0844565	-0.0479033	0.0870019	-0.00844988	0.102274			0.858	0.230816	0.181181	0.122637			0.858	0.09082	0.12264	0.60499			0.858
	0.859	0.0386396	0.0220947	-0.0542667	0.0475485	-0.0148133	0.0322762			0.859	0.0513665	0.148091	0.169727	0.0691842	0.120092	0.0399123			0.859	0.00300433	0.0640934	0.0233674	0.0271854	0.0755476	0.0157312			0.859	0.00300433	0.0640934	-0.0440852	0.0691842	-0.0339037	0.0997288			0.859	0.22827	0.178636	0.131546			0.859	0.08955	0.15191	0.6279			0.859
	0.86	0.0322762	0.0297308	-0.0682663	0.041185	-0.00972257	0.0131859			0.86	0.0679115	0.150636	0.155727	0.05773	0.113728	0.0348216			0.86	-0.0148133	0.0717296	0.00300433	0.00936778	0.0666388	0.0170039			0.86	-0.0148133	0.0717296	-0.0453579	0.078093	-0.032631	0.125183			0.86	0.253724	0.163363	0.117546			0.86	0.09718	0.18627	0.61135			0.86
	0.861	0.020822	0.00809509	-0.069539	0.0475485	-0.0211768	0.0259127			0.861	0.0653661	0.139182	0.17609	0.0488212	0.113728	0.0500939			0.861	-0.0122679	0.0857292	0.0131859	0.0195493	0.0679115	0.0271854			0.861	-0.0122679	0.0857292	-0.0224495	0.0704569	-0.0122679	0.113728			0.861	0.238452	0.179908	0.122637			0.861	0.08955	0.21809	0.62917			0.861
	0.862	0.037367	0.0068224	-0.0593575	0.0488212	-0.0135406	0.0259127			0.862	0.0564573	0.149364	0.183726	0.061548	0.12391	0.0602754			0.862	-0.0122679	0.0806384	0.0119132	0.0246401	0.0831838	0.020822			0.862	-0.0122679	0.0806384	-0.0275402	0.0806384	-0.000813741	0.0984561			0.862	0.229543	0.168454	0.118819			0.862	0.07682	0.213	0.65971			0.862
	0.863	0.0437304	0.0119132	-0.0555394	0.0475485	-0.0122679	0.0284581			0.863	0.0590027	0.140455	0.17609	0.0551846	0.10991	0.0513665			0.863	-0.00972257	0.0844565	0.020822	0.0170039	0.0844565	0.0170039			0.863	-0.00972257	0.0844565	-0.0275402	0.0730023	0.00173164	0.103547			0.863	0.230816	0.188817	0.129001			0.863	0.11755	0.18754	0.71571			0.863
	0.864	0.0386396	0.0220947	-0.0542667	0.0335489	-0.0173587	0.0233674			0.864	0.0551846	0.149364	0.174817	0.0500939	0.127728	0.05773			0.864	0.00554971	0.0717296	0.000458949	0.0220947	0.0806384	0.0424577			0.864	0.00554971	0.0717296	-0.0313583	0.078093	0.00173164	0.102274			0.864	0.232089	0.186272	0.132819			0.864	0.06664	0.20663	0.75262			0.864
	0.865	0.037367	0.0182766	-0.0644482	0.0259127	-0.00844988	0.0106405			0.865	0.0653661	0.146818	0.178636	0.0500939	0.111183	0.0526392			0.865	-0.0059045	0.0844565	0.0182766	0.00936778	0.0704569	0.0182766			0.865	-0.0059045	0.0844565	-0.00844988	0.0679115	0.0106405	0.115001			0.865	0.244815	0.177363	0.132819			0.865	0.09082	0.21173	0.77171			0.865
	0.866	0.0526392	0.00936778	-0.0657209	0.037367	-0.0288129	0.0322762			0.866	0.0551846	0.149364	0.181181	0.0488212	0.115001	0.0539119			0.866	-0.00208643	0.0755476	0.0259127	0.00554971	0.0679115	0.0335489			0.866	-0.00208643	0.0755476	-0.0122679	0.0500939	0.0106405	0.115001			0.866	0.240997	0.174817	0.132819			0.866	0.09337	0.17227	0.76916			0.866
	0.867	0.0335489	0.0271854	-0.0619029	0.0437304	-0.0148133	0.0360943			0.867	0.05773	0.141728	0.167181	0.0386396	0.134091	0.0819111			0.867	-0.00717719	0.0806384	0.0144585	0.0246401	0.074275	0.0157312			0.867	-0.00717719	0.0806384	0.000458949	0.0640934	0.0119132	0.111183			0.867	0.229543	0.169727	0.115001			0.867	0.09082	0.15191	0.78953			0.867
	0.868	0.0399123	0.0106405	-0.0619029	0.0437304	-0.00717719	0.0360943			0.868	0.0653661	0.143	0.169727	0.0488212	0.115001	0.0348216			0.868	-0.0148133	0.0920926	0.0119132	0.0131859	0.0666388	0.0195493			0.868	-0.0148133	0.0920926	0.00809509	0.0704569	0.00809509	0.107365			0.868	0.248633	0.179908	0.139182			0.868	0.09464	0.11373	0.77807			0.868
	0.869	0.0220947	0.0195493	-0.0542667	0.0424577	-0.00335912	0.0284581			0.869	0.0679115	0.141728	0.168454	0.0602754	0.117546	0.0475485			0.869	0.00300433	0.0730023	0.00427702	0.0144585	0.094638	0.0259127			0.869	0.00300433	0.0730023	0.020822	0.0755476	0.0106405	0.122637			0.869	0.233361	0.172272	0.12391			0.869	0.09973	0.08318	0.78698			0.869
	0.87	0.0233674	0.0233674	-0.069539	0.0348216	-0.0199041	0.0195493			0.87	0.0551846	0.150636	0.188817	0.041185	0.10991	0.0551846			0.87	0.00173164	0.0755476	0.0157312	0.00300433	0.0768203	0.0386396			0.87	0.00173164	0.0755476	0.0170039	0.0717296	0.0220947	0.103547			0.87	0.225725	0.170999	0.137909			0.87	0.10482	0.03737	0.76916			0.87
	0.871	0.0310035	0.00554971	-0.0720844	0.0475485	-0.0122679	0.020822			0.871	0.0590027	0.153182	0.173545	0.0437304	0.112456	0.0679115			0.871	0.0068224	0.0691842	0.000458949	0.0157312	0.0691842	0.0259127			0.871	0.0068224	0.0691842	0.0220947	0.074275	0.0271854	0.0920926			0.871	0.229543	0.173545	0.135364			0.871	0.10482	0.045	0.70935			0.871
	0.872	0.041185	0.00809509	-0.0580848	0.0335489	-0.0173587	0.0170039			0.872	0.0590027	0.140455	0.164636	0.0628207	0.130273	0.0450031			0.872	-0.00844988	0.0870019	0.0271854	0.00809509	0.0806384	0.0322762			0.872	-0.00844988	0.0870019	0.0195493	0.0691842	0.0284581	0.118819			0.872	0.237179	0.188817	0.111183			0.872	0.08064	0.07427	0.68644			0.872
	0.873	0.0220947	0.0144585	-0.0644482	0.037367	-0.0224495	0.0271854			0.873	0.05773	0.135364	0.172272	0.0462758	0.117546	0.0590027			0.873	0.000458949	0.0882745	0.0170039	0.0170039	0.0793657	0.0170039			0.873	0.000458949	0.0882745	0.0488212	0.074275	0.0348216	0.10991			0.873	0.235906	0.181181	0.127728			0.873	0.09718	0.06155	0.65844			0.873
	0.874	0.0297308	0.00809509	-0.0644482	0.0310035	-0.0135406	0.0195493			0.874	0.0602754	0.158273	0.163363	0.0500939	0.120092	0.0640934			0.874	-0.000813741	0.0882745	-0.00463181	0.0271854	0.0768203	0.0144585			0.874	-0.000813741	0.0882745	0.0131859	0.0590027	0.0437304	0.108638			0.874	0.235906	0.167181	0.121365			0.874	0.09464	0.09973	0.60371			0.874
	0.875	0.0322762	-0.00208643	-0.0606302	0.0360943	-0.000813741	0.00554971			0.875	0.0526392	0.149364	0.170999	0.0462758	0.104819	0.0640934			0.875	-0.000813741	0.0666388	0.00427702	0.0157312	0.0717296	0.0220947			0.875	-0.000813741	0.0666388	0.0475485	0.0653661	0.0399123	0.115001			0.875	0.226998	0.165909	0.134091			0.875	0.09591	0.13409	0.6368			0.875
	0.876	0.0271854	0.00300433	-0.049176	0.041185	-0.0224495	0.0335489			0.876	0.0539119	0.141728	0.17609	0.0590027	0.113728	0.0590027			0.876	-0.00463181	0.0870019	0.0233674	0.0157312	0.0831838	0.037367			0.876	-0.00463181	0.0870019	0.0475485	0.0602754	0.0475485	0.101001			0.876	0.235906	0.184999	0.10991			0.876	0.08955	0.17609	0.63935			0.876
	0.877	0.0259127	0.0195493	-0.049176	0.0335489	-0.0173587	0.0284581			0.877	0.0564573	0.145546	0.187544	0.0335489	0.125183	0.0513665			0.877	-0.0109953	0.0933653	0.0157312	0.0106405	0.0908199	0.0259127			0.877	-0.0109953	0.0933653	0.0475485	0.074275	0.0360943	0.107365			0.877	0.233361	0.182454	0.130273			0.877	0.09337	0.19009	0.62917			0.877
	0.878	0.0246401	0.0259127	-0.0809932	0.0360943	-0.0109953	0.037367			0.878	0.061548	0.136637	0.172272	0.0335489	0.113728	0.0679115			0.878	-0.00972257	0.0679115	0.0119132	0.0182766	0.0679115	0.0233674			0.878	-0.00972257	0.0679115	0.0691842	0.05773	0.078093	0.117546			0.878	0.221907	0.153182	0.125183			0.878	0.08064	0.227	0.64317			0.878
	0.879	0.0284581	0.020822	-0.0657209	0.0310035	-0.00972257	0.020822			0.879	0.0691842	0.129001	0.178636	0.0551846	0.131546	0.0539119			0.879	0.00173164	0.0908199	0.000458949	0.0119132	0.0679115	0.0131859			0.879	0.00173164	0.0908199	0.05773	0.0691842	0.0666388	0.108638			0.879	0.24227	0.187544	0.139182			0.879	0.10482	0.24227	0.6788			0.879
	0.88	0.0106405	0.0131859	-0.0568121	0.0424577	-0.0173587	0.0284581			0.88	0.0653661	0.144273	0.154454	0.0628207	0.108638	0.0679115			0.88	-0.00844988	0.0882745	0.0157312	0.020822	0.0908199	0.0271854			0.88	-0.00844988	0.0882745	0.0475485	0.05773	0.05773	0.122637			0.88	0.226998	0.177363	0.125183			0.88	0.09464	0.22827	0.69535			0.88
	0.881	0.0170039	0.0144585	-0.0657209	0.0386396	-0.00717719	0.0297308			0.881	0.061548	0.136637	0.174817	0.0475485	0.102274	0.0691842			0.881	-0.0059045	0.0882745	0.0131859	0.00936778	0.0755476	0.0131859			0.881	-0.0059045	0.0882745	0.061548	0.0653661	0.0602754	0.112456			0.881	0.234634	0.187544	0.125183			0.881	0.08955	0.22573	0.75262			0.881
	0.882	0.0322762	0.0182766	-0.0580848	0.0424577	-0.0186314	0.0271854			0.882	0.0653661	0.145546	0.16209	0.0424577	0.120092	0.0513665			0.882	0.00300433	0.0882745	0.0157312	0.0246401	0.0857292	0.0259127			0.882	0.00300433	0.0882745	0.0679115	0.05773	0.0691842	0.104819			0.882	0.233361	0.183726	0.12391			0.882	0.09082	0.18373	0.75389			0.882
	0.883	0.0182766	0.0220947	-0.0708117	0.0360943	-0.00717719	0.0170039			0.883	0.0717296	0.137909	0.170999	0.0462758	0.113728	0.0602754			0.883	-0.00717719	0.078093	0.0157312	0.0284581	0.0908199	0.0170039			0.883	-0.00717719	0.078093	0.0691842	0.0793657	0.0679115	0.108638			0.883	0.220634	0.169727	0.131546			0.883	0.08446	0.16845	0.77935			0.883
	0.884	0.0284581	0.0131859	-0.0682663	0.0310035	-0.0186314	0.0386396			0.884	0.0691842	0.143	0.177363	0.0564573	0.113728	0.0513665			0.884	-0.00717719	0.0628207	0.00936778	0.00809509	0.0895472	0.0284581			0.884	-0.00717719	0.0628207	0.0666388	0.0666388	0.0857292	0.094638			0.884	0.218089	0.179908	0.129001			0.884	0.087	0.12136	0.76153			0.884
	0.885	0.0233674	0.0106405	-0.0555394	0.0399123	-0.00335912	0.0335489			0.885	0.0590027	0.131546	0.164636	0.0475485	0.113728	0.0691842			0.885	-0.00208643	0.074275	0.00300433	0.0119132	0.0793657	0.0106405			0.885	-0.00208643	0.074275	0.0691842	0.0628207	0.078093	0.0933653			0.885	0.238452	0.179908	0.112456			0.885	0.09846	0.10482	0.74371			0.885
	0.886	0.037367	0.020822	-0.069539	0.037367	-0.0135406	0.020822			0.886	0.0628207	0.143	0.170999	0.037367	0.111183	0.0640934			0.886	-0.00717719	0.0793657	-0.000813741	0.0322762	0.0819111	0.0220947			0.886	-0.00717719	0.0793657	0.0971834	0.074275	0.0882745	0.107365			0.886	0.237179	0.19009	0.115001			0.886	0.07427	0.07555	0.74626			0.886
	0.887	0.0386396	0.0259127	-0.0580848	0.0335489	-0.0288129	0.0284581			0.887	0.0704569	0.135364	0.178636	0.0564573	0.112456	0.0590027			0.887	-0.00463181	0.078093	0.0310035	0.0182766	0.0882745	0.0119132			0.887	-0.00463181	0.078093	0.0691842	0.0755476	0.078093	0.0997288			0.887	0.205362	0.154454	0.12391			0.887	0.09718	0.04755	0.72207			0.887
	0.888	0.020822	0.0131859	-0.0580848	0.0399123	-0.00208643	0.0271854			0.888	0.0691842	0.140455	0.17609	0.0310035	0.12391	0.0717296			0.888	-0.0173587	0.0882745	0.00300433	0.0195493	0.0933653	0.0220947			0.888	-0.0173587	0.0882745	0.0933653	0.0640934	0.0806384	0.103547			0.888	0.238452	0.170999	0.129001			0.888	0.10991	0.03991	0.6928			0.888
	0.889	0.0322762	0.0182766	-0.0720844	0.0297308	-0.00463181	0.0335489			0.889	0.0666388	0.135364	0.186272	0.0488212	0.113728	0.0500939			0.889	-0.0135406	0.094638	0.0119132	0.0271854	0.0959107	0.0297308			0.889	-0.0135406	0.094638	0.0704569	0.0679115	0.10991	0.10991			0.889	0.210453	0.173545	0.115001			0.889	0.08955	0.03864	0.67371			0.889
	0.89	0.0259127	0.0144585	-0.0568121	0.0500939	-0.0109953	0.0233674			0.89	0.078093	0.137909	0.154454	0.05773	0.0984561	0.0500939			0.89	-0.016086	0.0691842	0.0157312	0.00936778	0.0793657	0.0144585			0.89	-0.016086	0.0691842	0.0908199	0.0755476	0.0984561	0.113728			0.89	0.196453	0.169727	0.126455			0.89	0.09718	0.06918	0.61899			0.89
	0.891	0.0310035	0.0233674	-0.0682663	0.0335489	-0.0173587	0.0462758			0.891	0.0755476	0.130273	0.164636	0.0386396	0.113728	0.0526392			0.891	-0.00844988	0.0806384	0.0131859	0.0195493	0.0717296	0.0182766			0.891	-0.00844988	0.0806384	0.094638	0.0755476	0.101001	0.111183			0.891	0.229543	0.177363	0.12391			0.891	0.09846	0.09973	0.61644			0.891
	0.892	0.0284581	0.0119132	-0.0517213	0.0399123	-0.0148133	0.041185			0.892	0.0640934	0.130273	0.167181	0.0500939	0.108638	0.05773			0.892	-0.00335912	0.0844565	0.0220947	0.00427702	0.0882745	0.0233674			0.892	-0.00335912	0.0844565	0.094638	0.0602754	0.0997288	0.102274			0.892	0.207907	0.170999	0.127728			0.892	0.07937	0.14555	0.59862			0.892
	0.893	0.0170039	0.0119132	-0.0657209	0.0335489	-0.00844988	0.0220947			0.893	0.0679115	0.137909	0.172272	0.0475485	0.0844565	0.0691842			0.893	0.000458949	0.0895472	0.00936778	0.0144585	0.0895472	0.0157312			0.893	0.000458949	0.0895472	0.094638	0.0806384	0.122637	0.112456			0.893	0.212998	0.17609	0.139182			0.893	0.09973	0.16973	0.59735			0.893
	0.894	0.0233674	0.0170039	-0.0644482	0.0386396	-0.00844988	0.00936778			0.894	0.0691842	0.145546	0.17609	0.0437304	0.108638	0.0653661			0.894	-0.00463181	0.0717296	0.0170039	0.0284581	0.0908199	0.0106405			0.894	-0.00463181	0.0717296	0.103547	0.0640934	0.101001	0.107365			0.894	0.214271	0.177363	0.127728			0.894	0.09973	0.19391	0.64062			0.894
	0.895	0.0233674	0.0170039	-0.0466306	0.0348216	-0.0135406	0.0271854			0.895	0.0704569	0.135364	0.170999	0.0500939	0.104819	0.0590027			0.895	0.00427702	0.0793657	0.0195493	0.0182766	0.0895472	0.0297308			0.895	0.00427702	0.0793657	0.101001	0.0602754	0.113728	0.0882745			0.895	0.205362	0.172272	0.112456			0.895	0.09973	0.19264	0.65717			0.895
	0.896	0.0246401	0.0119132	-0.073357	0.0386396	-0.0249948	0.0233674			0.896	0.0679115	0.129001	0.168454	0.0526392	0.0984561	0.0488212			0.896	-0.0224495	0.078093	0.0182766	0.0170039	0.0844565	0.0182766			0.896	-0.0224495	0.078093	0.0984561	0.0653661	0.116274	0.118819			0.896	0.195181	0.169727	0.12391			0.896	0.09973	0.23209	0.6508			0.896
	0.897	0.0310035	0.0106405	-0.0619029	0.0246401	-0.000813741	0.0233674			0.897	0.0717296	0.131546	0.170999	0.0259127	0.108638	0.0539119			0.897	-0.00335912	0.0819111	0.0106405	0.0195493	0.0730023	0.0170039			0.897	-0.00335912	0.0819111	0.103547	0.0691842	0.125183	0.0984561			0.897	0.193908	0.160818	0.116274			0.897	0.09718	0.22573	0.71826			0.897
	0.898	0.0220947	-0.00208643	-0.0555394	0.0386396	-0.0313583	0.0322762			0.898	0.078093	0.12391	0.165909	0.0399123	0.104819	0.0450031			0.898	-0.00717719	0.0793657	0.0106405	0.0220947	0.074275	0.0170039			0.898	-0.00717719	0.0793657	0.094638	0.078093	0.131546	0.111183			0.898	0.187544	0.177363	0.137909			0.898	0.09591	0.22318	0.73989			0.898
	0.899	0.0119132	0.00936778	-0.0631755	0.0437304	-0.00208643	0.0322762			0.899	0.0768203	0.120092	0.16209	0.0500939	0.0997288	0.0513665			0.899	-0.0148133	0.0895472	0.00173164	0.0360943	0.0908199	0.000458949			0.899	-0.0148133	0.0895472	0.0984561	0.0704569	0.104819	0.107365			0.899	0.207907	0.168454	0.115001			0.899	0.09464	0.199	0.76535			0.899
	0.9	0.0157312	0.0144585	-0.0784478	0.0475485	-0.0122679	0.0322762			0.9	0.0768203	0.122637	0.159545	0.0322762	0.108638	0.061548			0.9	-0.0135406	0.0730023	0.0195493	0.0170039	0.0831838	0.0106405			0.9	-0.0135406	0.0730023	0.117546	0.0691842	0.120092	0.125183			0.9	0.186272	0.164636	0.113728			0.9	0.10227	0.14427	0.77935			0.9
	0.901	0.0170039	0.0195493	-0.0555394	0.0360943	0.0068224	0.0310035			0.901	0.0755476	0.126455	0.170999	0.0424577	0.108638	0.0437304			0.901	-0.0059045	0.0793657	0.0182766	0.0170039	0.0895472	0.0182766			0.901	-0.0059045	0.0793657	0.120092	0.0755476	0.122637	0.102274			0.901	0.184999	0.154454	0.120092			0.901	0.087	0.13536	0.77425			0.901
	0.902	0.0182766	-0.00335912	-0.0580848	0.0310035	-0.00844988	0.0157312			0.902	0.0806384	0.140455	0.169727	0.0475485	0.0959107	0.0590027			0.902	-0.0122679	0.0755476	-0.00463181	0.0233674	0.0768203	0.020822			0.902	-0.0122679	0.0755476	0.101001	0.061548	0.12391	0.12391			0.902	0.186272	0.164636	0.120092			0.902	0.08827	0.101	0.78062			0.902
	0.903	0.0195493	0.0119132	-0.0606302	0.0284581	0.000458949	0.0271854			0.903	0.0768203	0.120092	0.153182	0.0424577	0.101001	0.0539119			0.903	-0.0109953	0.0806384	0.0106405	0.0195493	0.0793657	0.0233674			0.903	-0.0109953	0.0806384	0.103547	0.0704569	0.108638	0.0971834			0.903	0.16209	0.173545	0.126455			0.903	0.08827	0.073	0.7488			0.903
	0.904	0.0348216	0.0131859	-0.0542667	0.0271854	-0.0288129	0.0386396			0.904	0.0768203	0.112456	0.17609	0.0297308	0.101001	0.0602754			0.904	-0.0199041	0.0793657	0.0157312	0.0195493	0.0844565	0.0195493			0.904	-0.0199041	0.0793657	0.113728	0.0640934	0.117546	0.0984561			0.904	0.177363	0.151909	0.126455			0.904	0.08827	0.08573	0.71826			0.904
	0.905	0.0131859	0.020822	-0.0759024	0.0348216	-0.000813741	0.0335489			0.905	0.0844565	0.121365	0.163363	0.0437304	0.0895472	0.0450031			0.905	-0.00463181	0.094638	0.0182766	0.0284581	0.0895472	0.00936778			0.905	-0.00463181	0.094638	0.104819	0.0679115	0.136637	0.101001			0.905	0.143	0.158273	0.127728			0.905	0.09464	0.09337	0.68517			0.905
	0.906	0.0271854	0.0106405	-0.0682663	0.0322762	-0.0173587	0.0322762			0.906	0.0666388	0.130273	0.17609	0.0246401	0.104819	0.0360943			0.906	-0.0199041	0.0806384	0.0220947	-0.00463181	0.0882745	0.0068224			0.906	-0.0199041	0.0806384	0.103547	0.0666388	0.125183	0.115001			0.906	0.157	0.17609	0.115001			0.906	0.10227	0.08827	0.67117			0.906
	0.907	0.0233674	0.00173164	-0.0682663	0.041185	-0.0135406	0.0233674			0.907	0.0691842	0.125183	0.177363	0.0526392	0.0984561	0.041185			0.907	-0.00972257	0.0920926	0.0119132	0.0157312	0.0755476	0.00554971			0.907	-0.00972257	0.0920926	0.107365	0.0806384	0.135364	0.0933653			0.907	0.160818	0.167181	0.126455			0.907	0.11373	0.11373	0.65208			0.907
	0.908	0.0195493	0.0119132	-0.0708117	0.037367	-0.0122679	0.0310035			0.908	0.0793657	0.121365	0.158273	0.0424577	0.0857292	0.0602754			0.908	-0.00972257	0.0895472	0.00809509	0.0233674	0.0844565	0.0322762			0.908	-0.00972257	0.0895472	0.101001	0.0793657	0.134091	0.103547			0.908	0.127728	0.158273	0.121365			0.908	0.08827	0.13664	0.64062			0.908
	0.909	0.0246401	0.00809509	-0.0466306	0.0259127	-0.00335912	0.0106405			0.909	0.0704569	0.120092	0.159545	0.0437304	0.104819	0.0322762			0.909	-0.00972257	0.101001	0.0170039	0.0170039	0.094638	-0.00335912			0.909	-0.00972257	0.101001	0.121365	0.0806384	0.139182	0.10991			0.909	0.145546	0.154454	0.111183			0.909	0.09718	0.18882	0.63171			0.909
	0.91	0.020822	0.0131859	-0.0669936	0.0284581	-0.0173587	0.0170039			0.91	0.0717296	0.116274	0.165909	0.0424577	0.0691842	0.0437304			0.91	-0.0122679	0.0793657	0.00936778	0.0157312	0.0933653	0.0297308			0.91	-0.0122679	0.0793657	0.106092	0.0653661	0.127728	0.116274			0.91	0.159545	0.165909	0.112456			0.91	0.09337	0.24863	0.63426			0.91
	0.911	0.0182766	-0.00208643	-0.0784478	0.0322762	-0.00208643	0.0322762			0.911	0.0730023	0.117546	0.177363	0.0233674	0.0895472	0.0348216			0.911	-0.0122679	0.0717296	0.00554971	0.0310035	0.0933653	0.00173164			0.911	-0.0122679	0.0717296	0.10991	0.074275	0.141728	0.0997288			0.911	0.136637	0.170999	0.130273			0.911	0.09718	0.25118	0.64699			0.911
	0.912	0.0170039	0.00300433	-0.0631755	0.0386396	0.00554971	0.0170039			0.912	0.0755476	0.117546	0.155727	0.0386396	0.0971834	0.041185			0.912	-0.0122679	0.0870019	0.0119132	0.0195493	0.0882745	0.0271854			0.912	-0.0122679	0.0870019	0.111183	0.078093	0.137909	0.107365			0.912	0.148091	0.136637	0.135364			0.912	0.09209	0.27027	0.65208			0.912
	0.913	0.0220947	-0.000813741	-0.0580848	0.0386396	-0.0059045	0.0068224			0.913	0.0679115	0.120092	0.168454	0.0488212	0.0997288	0.0335489			0.913	-0.0186314	0.0653661	0.020822	0.0131859	0.0933653	0.0195493			0.913	-0.0186314	0.0653661	0.0997288	0.0730023	0.136637	0.101001			0.913	0.151909	0.163363	0.107365			0.913	0.09337	0.27281	0.71826			0.913
	0.914	0.0297308	0.0310035	-0.0542667	0.041185	-0.00208643	0.0271854			0.914	0.0666388	0.10991	0.158273	0.037367	0.0730023	0.0399123			0.914	-0.0148133	0.0819111	0.020822	0.0144585	0.0971834	0.0195493			0.914	-0.0148133	0.0819111	0.112456	0.094638	0.135364	0.0857292			0.914	0.148091	0.159545	0.112456			0.914	0.09973	0.23845	0.74626			0.914
	0.915	0.0195493	0.00936778	-0.0542667	0.037367	-0.0122679	0.0335489			0.915	0.0640934	0.101001	0.155727	0.0182766	0.104819	0.0424577			0.915	-0.0135406	0.0768203	-0.00463181	0.00554971	0.0895472	0.00936778			0.915	-0.0135406	0.0768203	0.108638	0.0819111	0.140455	0.102274			0.915	0.165909	0.149364	0.112456			0.915	0.07682	0.23591	0.76916			0.915
	0.916	0.0284581	0.00554971	-0.073357	0.0399123	-0.0135406	0.0182766			0.916	0.05773	0.111183	0.158273	0.0462758	0.0844565	0.0271854			0.916	-0.0122679	0.0870019	0.0131859	0.0131859	0.0844565	0.00173164			0.916	-0.0122679	0.0870019	0.0882745	0.0602754	0.129001	0.0959107			0.916	0.154454	0.160818	0.113728			0.916	0.09973	0.22318	0.78953			0.916
	0.917	0.0170039	0.00809509	-0.069539	0.0310035	-0.0122679	0.0284581			0.917	0.0755476	0.104819	0.160818	0.0348216	0.0819111	0.0399123			0.917	-0.0135406	0.074275	0.0131859	0.0157312	0.101001	0.0119132			0.917	-0.0135406	0.074275	0.0984561	0.0679115	0.141728	0.104819			0.917	0.168454	0.150636	0.115001			0.917	0.09082	0.17227	0.7768			0.917
	0.918	0.0157312	0.00554971	-0.0669936	0.0360943	-0.0148133	0.0475485			0.918	0.0666388	0.112456	0.172272	0.0246401	0.0793657	0.0246401			0.918	-0.016086	0.0768203	0.0170039	0.00554971	0.0844565	0.00554971			0.918	-0.016086	0.0768203	0.112456	0.0870019	0.144273	0.117546			0.918	0.159545	0.146818	0.104819			0.918	0.08446	0.13536	0.77807			0.918
	0.919	0.0170039	0.0119132	-0.0682663	0.020822	-0.0186314	0.0310035			0.919	0.0679115	0.113728	0.155727	0.0259127	0.0793657	0.0310035			0.919	-0.0351764	0.0768203	0.0106405	0.020822	0.0870019	0.0220947			0.919	-0.0351764	0.0768203	0.108638	0.0768203	0.140455	0.0806384			0.919	0.145546	0.164636	0.117546			0.919	0.08446	0.11882	0.78189			0.919
	0.92	0.00427702	0.000458949	-0.0644482	0.0399123	-0.00208643	0.0195493			0.92	0.0691842	0.112456	0.140455	0.0335489	0.0882745	0.0526392			0.92	-0.00335912	0.0933653	0.0144585	0.00300433	0.0895472	0.0195493			0.92	-0.00335912	0.0933653	0.0984561	0.0895472	0.125183	0.0870019			0.92	0.157	0.148091	0.116274			0.92	0.09464	0.07173	0.76916			0.92
	0.921	0.0182766	0.0144585	-0.0619029	0.0259127	0.00300433	0.0284581			0.921	0.0704569	0.102274	0.16209	0.0322762	0.0793657	0.0539119			0.921	-0.00844988	0.0870019	0.0131859	0.0170039	0.0806384	0.0131859			0.921	-0.00844988	0.0870019	0.0870019	0.078093	0.140455	0.0908199			0.921	0.16209	0.168454	0.115001			0.921	0.09846	0.087	0.73098			0.921
	0.922	0.0170039	0.0131859	-0.0619029	0.0310035	-0.016086	0.0131859			0.922	0.05773	0.0819111	0.168454	0.0322762	0.0831838	0.0310035			0.922	-0.016086	0.0806384	0.020822	0.00809509	0.094638	0.0131859			0.922	-0.016086	0.0806384	0.094638	0.0768203	0.145546	0.0895472			0.922	0.153182	0.150636	0.129001			0.922	0.09973	0.08827	0.6788			0.922
	0.923	0.0195493	-0.00335912	-0.0657209	0.0284581	0.00554971	0.0310035			0.923	0.0653661	0.102274	0.148091	0.0182766	0.0730023	0.0322762			0.923	-0.0186314	0.0793657	-0.00717719	0.0119132	0.101001	0.0157312			0.923	-0.0186314	0.0793657	0.0806384	0.0895472	0.145546	0.103547			0.923	0.164636	0.157	0.107365			0.923	0.101	0.09082	0.65589			0.923
	0.924	0.0271854	0.0119132	-0.0669936	0.0399123	-0.016086	0.0068224			0.924	0.0691842	0.10991	0.158273	0.0284581	0.0870019	0.0475485			0.924	-0.0122679	0.0870019	-0.00335912	0.00936778	0.0691842	0.0144585			0.924	-0.0122679	0.0870019	0.0908199	0.0691842	0.130273	0.0908199			0.924	0.170999	0.155727	0.104819			0.924	0.09846	0.10227	0.64699			0.924
	0.925	0.00936778	0.00936778	-0.0631755	0.0335489	-0.0122679	0.0220947			0.925	0.0679115	0.0908199	0.141728	0.0284581	0.0768203	0.0195493			0.925	-0.0135406	0.0717296	0.0182766	0.0386396	0.0895472	0.0170039			0.925	-0.0135406	0.0717296	0.0857292	0.0704569	0.120092	0.107365			0.925	0.158273	0.131546	0.113728			0.925	0.087	0.12518	0.64062			0.925
	0.926	0.0157312	-0.00844988	-0.0542667	0.0297308	0.000458949	0.0437304			0.926	0.0717296	0.101001	0.184999	0.0259127	0.0933653	0.0322762			0.926	-0.00844988	0.0806384	0.0297308	0.0157312	0.0895472	0.0131859			0.926	-0.00844988	0.0806384	0.0920926	0.061548	0.140455	0.0895472			0.926	0.168454	0.153182	0.102274			0.926	0.08064	0.17609	0.62408			0.926
	0.927	0.000458949	0.0233674	-0.0644482	0.0259127	-0.00335912	0.0246401			0.927	0.074275	0.106092	0.153182	0.0259127	0.0704569	0.0297308			0.927	-0.0059045	0.0793657	0.000458949	0.0170039	0.0920926	0.0106405			0.927	-0.0059045	0.0793657	0.0691842	0.0704569	0.145546	0.0857292			0.927	0.174817	0.148091	0.126455			0.927	0.10227	0.18754	0.64826			0.927
	0.928	0.0157312	0.0170039	-0.0682663	0.0271854	-0.00972257	0.0195493			0.928	0.061548	0.0895472	0.155727	0.037367	0.0755476	0.0399123			0.928	-0.0211768	0.094638	0.00173164	0.00427702	0.078093	0.0271854			0.928	-0.0211768	0.094638	0.0806384	0.0590027	0.130273	0.0882745			0.928	0.167181	0.134091	0.108638			0.928	0.09209	0.20663	0.65971			0.928
	0.929	0.0144585	0.0182766	-0.0555394	0.0220947	-0.00208643	0.0182766			0.929	0.074275	0.0933653	0.155727	0.037367	0.0730023	0.0259127			0.929	-0.016086	0.0895472	0.00300433	0.0170039	0.0870019	0.00809509			0.929	-0.016086	0.0895472	0.078093	0.0730023	0.137909	0.0857292			0.929	0.173545	0.144273	0.104819			0.929	0.09082	0.24354	0.66735			0.929
	0.93	0.00809509	0.0170039	-0.0657209	0.0271854	-0.016086	0.00936778			0.93	0.0730023	0.0793657	0.155727	0.0437304	0.074275	0.0284581			0.93	-0.016086	0.0857292	0.0246401	0.0259127	0.103547	0.0068224			0.93	-0.016086	0.0857292	0.0819111	0.0831838	0.139182	0.0793657			0.93	0.168454	0.136637	0.111183			0.93	0.07555	0.25245	0.71698			0.93
	0.931	0.00554971	0.0182766	-0.0504486	0.0259127	-0.0122679	0.0284581			0.931	0.0691842	0.0971834	0.170999	0.0399123	0.0691842	0.0259127			0.931	-0.0288129	0.0895472	0.000458949	0.00300433	0.0793657	0.0119132			0.931	-0.0288129	0.0895472	0.0844565	0.0819111	0.130273	0.0959107			0.931	0.165909	0.139182	0.107365			0.931	0.08318	0.22191	0.74498			0.931
	0.932	0.0170039	0.0157312	-0.0657209	0.037367	-0.00335912	0.0131859			0.932	0.0666388	0.0920926	0.168454	0.0271854	0.0857292	0.0170039			0.932	0.000458949	0.0895472	0.0310035	-0.00717719	0.0933653	0.0195493			0.932	0.000458949	0.0895472	0.0870019	0.0564573	0.135364	0.0882745			0.932	0.187544	0.151909	0.0933653			0.932	0.08827	0.213	0.77171			0.932
	0.933	0.0233674	0.0157312	-0.052994	0.020822	-0.0186314	0.0271854			0.933	0.0793657	0.0908199	0.160818	0.020822	0.0857292	0.0386396			0.933	-0.00844988	0.078093	0.00427702	0.0182766	0.0895472	0.0259127			0.933	-0.00844988	0.078093	0.0640934	0.0666388	0.122637	0.0730023			0.933	0.169727	0.149364	0.102274			0.933	0.08064	0.17227	0.80989			0.933
	0.934	0.0233674	0.00300433	-0.0759024	0.0475485	-0.00208643	0.0131859			0.934	0.0666388	0.0882745	0.146818	0.0322762	0.0768203	0.0310035			0.934	-0.0249948	0.0831838	0.00554971	0.0259127	0.0908199	0.0068224			0.934	-0.0249948	0.0831838	0.0793657	0.0768203	0.121365	0.0895472			0.934	0.159545	0.121365	0.10991			0.934	0.08191	0.15191	0.7908			0.934
	0.935	0.0246401	0.0068224	-0.0682663	0.0297308	-0.0122679	0.0335489			0.935	0.0704569	0.0819111	0.16209	0.0284581	0.0691842	0.0310035			0.935	-0.0249948	0.078093	0.00936778	0.0170039	0.0844565	0.0182766			0.935	-0.0249948	0.078093	0.0691842	0.0691842	0.140455	0.0844565			0.935	0.167181	0.130273	0.102274			0.935	0.07937	0.12009	0.79207			0.935
	0.936	0.0068224	0.00427702	-0.0479033	0.0437304	-0.00335912	0.0233674			0.936	0.074275	0.0984561	0.158273	0.0475485	0.0666388	0.0284581			0.936	-0.0148133	0.0844565	0.00936778	0.0119132	0.0768203	0.020822			0.936	-0.0148133	0.0844565	0.078093	0.05773	0.12391	0.0857292			0.936	0.170999	0.132819	0.0984561			0.936	0.08064	0.10227	0.76025			0.936
	0.937	0.00554971	0.0131859	-0.0580848	0.020822	-0.016086	0.0386396			0.937	0.0844565	0.0844565	0.155727	0.0437304	0.0844565	0.0348216			0.937	-0.0135406	0.0806384	0.00173164	0.00300433	0.0895472	0.0195493			0.937	-0.0135406	0.0806384	0.0666388	0.078093	0.116274	0.0908199			0.937	0.158273	0.143	0.0997288			0.937	0.08191	0.08955	0.75516			0.937
	0.938	0.0106405	0.0144585	-0.0542667	0.0322762	0.0068224	0.0271854			0.938	0.0793657	0.0870019	0.145546	0.0450031	0.0844565	0.0157312			0.938	-0.0224495	0.103547	0.00809509	0.0170039	0.0920926	0.0195493			0.938	-0.0224495	0.103547	0.0920926	0.0628207	0.130273	0.0793657			0.938	0.149364	0.143	0.103547			0.938	0.087	0.09082	0.73862			0.938
	0.939	0.00936778	0.0131859	-0.0631755	0.0310035	-0.0148133	0.0182766			0.939	0.0730023	0.0882745	0.154454	0.0335489	0.0857292	0.0246401			0.939	-0.0059045	0.0857292	-0.00208643	0.0386396	0.0793657	0.0259127			0.939	-0.0059045	0.0857292	0.0806384	0.0602754	0.135364	0.0882745			0.939	0.160818	0.145546	0.104819			0.939	0.08446	0.06664	0.68644			0.939
	0.94	0.0170039	0.0106405	-0.0580848	0.0297308	-0.00463181	0.020822			0.94	0.0704569	0.0908199	0.154454	0.0322762	0.0870019	0.0259127			0.94	-0.0199041	0.0730023	0.0157312	0.0233674	0.0666388	0.0246401			0.94	-0.0199041	0.0730023	0.0691842	0.0730023	0.140455	0.0870019			0.94	0.157	0.145546	0.0920926			0.94	0.10864	0.09082	0.65589			0.94
	0.941	0.020822	0.0106405	-0.0504486	0.0437304	-0.00463181	0.0144585			0.941	0.0819111	0.0806384	0.163363	0.0284581	0.0819111	0.0386396			0.941	-0.0173587	0.0844565	0.020822	0.000458949	0.0882745	0.00809509			0.941	-0.0173587	0.0844565	0.0640934	0.0691842	0.126455	0.106092			0.941	0.170999	0.139182	0.104819			0.941	0.09718	0.13027	0.66098			0.941
	0.942	0.0106405	0.00427702	-0.0555394	0.0450031	-0.0224495	0.0182766			0.942	0.0717296	0.0806384	0.165909	0.0348216	0.078093	0.0233674			0.942	-0.00463181	0.0908199	0.0131859	0.0157312	0.094638	0.0284581			0.942	-0.00463181	0.0908199	0.0819111	0.0539119	0.129001	0.0793657			0.942	0.172272	0.127728	0.10991			0.942	0.09337	0.17482	0.6368			0.942
	0.943	0.0131859	-0.000813741	-0.0606302	0.0182766	-0.00335912	0.020822			0.943	0.0730023	0.0844565	0.151909	0.0220947	0.0691842	0.0271854			0.943	0.00300433	0.0895472	0.0157312	0.0144585	0.078093	0.0233674			0.943	0.00300433	0.0895472	0.0730023	0.0590027	0.134091	0.0819111			0.943	0.173545	0.143	0.106092			0.943	0.07682	0.19391	0.64189			0.943
	0.944	0.0220947	0.0106405	-0.0606302	0.0131859	-0.0059045	0.00936778			0.944	0.0768203	0.0844565	0.151909	0.0360943	0.0844565	0.0220947			0.944	-0.0109953	0.0959107	0.0297308	0.0220947	0.0793657	0.00173164			0.944	-0.0109953	0.0959107	0.0831838	0.0590027	0.139182	0.094638			0.944	0.17609	0.127728	0.0933653			0.944	0.08955	0.19264	0.65589			0.944
	0.945	0.0220947	0.00173164	-0.0606302	0.0271854	-0.0109953	0.0144585			0.945	0.0793657	0.0870019	0.163363	0.0386396	0.078093	0.0424577			0.945	-0.0148133	0.094638	0.00173164	0.0106405	0.074275	0.0322762			0.945	-0.0148133	0.094638	0.0730023	0.0590027	0.139182	0.0691842			0.945	0.163363	0.129001	0.0984561			0.945	0.07937	0.21682	0.66353			0.945
	0.946	0.0157312	0.0144585	-0.0644482	0.0284581	0.00173164	0.0119132			0.946	0.0793657	0.0882745	0.154454	0.0271854	0.0793657	0.0259127			0.946	-0.00844988	0.0870019	0.0106405	0.0233674	0.0844565	0.0271854			0.946	-0.00844988	0.0870019	0.078093	0.0793657	0.159545	0.0844565			0.946	0.157	0.139182	0.0984561			0.946	0.087	0.21936	0.73607			0.946
	0.947	0.0182766	0.0131859	-0.0479033	0.0271854	-0.016086	0.0271854			0.947	0.0704569	0.0870019	0.150636	0.0386396	0.0768203	0.0335489			0.947	-0.00463181	0.0730023	0.0195493	0.000458949	0.0768203	0.0144585			0.947	-0.00463181	0.0730023	0.0666388	0.0399123	0.131546	0.0730023			0.947	0.154454	0.140455	0.104819			0.947	0.09591	0.23591	0.73226			0.947
	0.948	0.0131859	0.0068224	-0.0631755	0.0271854	-0.0122679	0.0220947			0.948	0.0768203	0.078093	0.165909	0.0335489	0.0730023	0.0399123			0.948	-0.00335912	0.101001	0.0195493	0.0182766	0.0806384	0.020822			0.948	-0.00335912	0.101001	0.0908199	0.0564573	0.135364	0.0768203			0.948	0.186272	0.132819	0.0933653			0.948	0.101	0.22827	0.76407			0.948
	0.949	0.0119132	0.00936778	-0.0542667	0.0131859	-0.0186314	0.0195493			0.949	0.0870019	0.0870019	0.158273	0.0271854	0.0640934	0.0335489			0.949	-0.0059045	0.0806384	0.00554971	0.020822	0.0819111	0.0106405			0.949	-0.0059045	0.0806384	0.0857292	0.0551846	0.121365	0.0882745			0.949	0.168454	0.127728	0.0844565			0.949	0.08446	0.18882	0.80353			0.949
	0.95	0.0297308	0.00554971	-0.0631755	0.0233674	0.00300433	0.00427702			0.95	0.0819111	0.0895472	0.159545	0.0386396	0.0844565	0.0450031			0.95	0.000458949	0.0717296	0.0144585	0.0131859	0.0691842	0.0220947			0.95	0.000458949	0.0717296	0.0908199	0.0590027	0.130273	0.0793657			0.95	0.172272	0.118819	0.094638			0.95	0.07427	0.14173	0.79971			0.95
	0.951	0.00936778	0.020822	-0.0720844	0.020822	-0.0109953	0.0220947			0.951	0.0691842	0.0793657	0.159545	0.041185	0.0831838	0.0220947			0.951	-0.00208643	0.0831838	0.0157312	0.0195493	0.0882745	0.0284581			0.951	-0.00208643	0.0831838	0.0895472	0.0513665	0.135364	0.0895472			0.951	0.169727	0.125183	0.0984561			0.951	0.10482	0.11118	0.78953			0.951
	0.952	0.00300433	-0.00844988	-0.0479033	0.0322762	-0.00972257	0.0182766			0.952	0.0806384	0.0768203	0.16209	0.0462758	0.0793657	0.0220947			0.952	-0.00717719	0.101001	0.0170039	0.0068224	0.0895472	0.0157312			0.952	-0.00717719	0.101001	0.074275	0.0500939	0.146818	0.094638			0.952	0.158273	0.153182	0.104819			0.952	0.09209	0.09718	0.80862			0.952
	0.953	0.00300433	-0.0059045	-0.0580848	0.0195493	-0.0122679	0.0335489			0.953	0.074275	0.0730023	0.170999	0.0322762	0.0730023	0.0348216			0.953	-0.0224495	0.0831838	0.0131859	0.0068224	0.101001	0.0322762			0.953	-0.0224495	0.0831838	0.0768203	0.0640934	0.125183	0.0768203			0.953	0.164636	0.131546	0.104819			0.953	0.08318	0.07682	0.78316			0.953
	0.954	0.00427702	0.0157312	-0.0568121	0.0144585	-0.0173587	0.0144585			0.954	0.0844565	0.0768203	0.159545	0.0220947	0.0806384	0.0462758			0.954	-0.00208643	0.0844565	0.00427702	0.0144585	0.0666388	0.0271854			0.954	-0.00208643	0.0844565	0.094638	0.0526392	0.149364	0.0882745			0.954	0.170999	0.125183	0.0730023			0.954	0.087	0.05773	0.75644			0.954
	0.955	0.0170039	0.00809509	-0.0580848	0.0131859	-0.0275402	0.00554971			0.955	0.0831838	0.0717296	0.145546	0.0335489	0.0793657	0.0271854			0.955	-0.00972257	0.0844565	0.00936778	0.0182766	0.0768203	0.0233674			0.955	-0.00972257	0.0844565	0.0882745	0.0399123	0.144273	0.078093			0.955	0.157	0.120092	0.0933653			0.955	0.07937	0.07427	0.70426			0.955
	0.956	0.0068224	0.00554971	-0.0631755	0.0348216	-0.0173587	0.0106405			0.956	0.0831838	0.0870019	0.154454	0.0500939	0.074275	0.0500939			0.956	-0.00844988	0.0819111	0.00809509	0.0144585	0.0793657	0.0259127			0.956	-0.00844988	0.0819111	0.0806384	0.0526392	0.118819	0.0882745			0.956	0.157	0.125183	0.107365			0.956	0.07937	0.06409	0.66098			0.956
	0.957	0.000458949	0.0170039	-0.0593575	0.0182766	-0.00335912	0.0233674			0.957	0.074275	0.0857292	0.16209	0.0322762	0.0908199	0.0310035			0.957	-0.016086	0.0933653	0.0170039	0.0068224	0.0844565	0.0284581			0.957	-0.016086	0.0933653	0.0933653	0.05773	0.145546	0.0768203			0.957	0.17609	0.129001	0.0984561			0.957	0.08191	0.07046	0.66989			0.957
	0.958	-0.000813741	0.00809509	-0.0479033	0.0170039	-0.016086	0.0131859			0.958	0.0870019	0.0755476	0.169727	0.0386396	0.078093	0.0399123			0.958	0.00427702	0.0959107	0.0259127	0.00427702	0.0895472	0.0170039			0.958	0.00427702	0.0959107	0.0870019	0.0704569	0.137909	0.0870019			0.958	0.165909	0.136637	0.0831838			0.958	0.087	0.11118	0.6368			0.958
	0.959	0.0170039	-0.00463181	-0.0580848	0.0360943	-0.0109953	0.0131859			0.959	0.0793657	0.0806384	0.159545	0.0539119	0.0679115	0.0335489			0.959	0.00173164	0.101001	0.0182766	0.0182766	0.0691842	0.0157312			0.959	0.00173164	0.101001	0.0819111	0.0513665	0.134091	0.0793657			0.959	0.154454	0.137909	0.094638			0.959	0.09464	0.15827	0.64062			0.959
	0.96	0.0068224	0.00936778	-0.0593575	0.0170039	-0.00335912	0.0182766			0.96	0.074275	0.0870019	0.155727	0.0360943	0.0870019	0.0220947			0.96	-0.00717719	0.0997288	0.00300433	0.00300433	0.0857292	0.0310035			0.96	-0.00717719	0.0997288	0.094638	0.0450031	0.140455	0.074275			0.96	0.154454	0.112456	0.0933653			0.96	0.09209	0.20409	0.65844			0.96
	0.961	0.00173164	0.0119132	-0.0619029	0.0297308	-0.0186314	0.0119132			0.961	0.0793657	0.0793657	0.16209	0.0233674	0.0691842	0.0399123			0.961	-0.000813741	0.0933653	0.0157312	0.00936778	0.0640934	0.0310035			0.961	-0.000813741	0.0933653	0.0984561	0.0539119	0.140455	0.0768203			0.961	0.16209	0.113728	0.0908199			0.961	0.073	0.22191	0.64189			0.961
	0.962	0.00809509	0.0170039	-0.0504486	0.0271854	-0.0122679	0.00809509			0.962	0.0831838	0.0870019	0.151909	0.037367	0.0895472	0.0348216			0.962	-0.00463181	0.0959107	0.0246401	0.0131859	0.0602754	0.0233674			0.962	-0.00463181	0.0959107	0.0971834	0.0551846	0.130273	0.0819111			0.962	0.188817	0.127728	0.0819111			0.962	0.08064	0.22827	0.68262			0.962
	0.963	0.00427702	0.0106405	-0.0644482	0.0246401	-0.0224495	0.0119132			0.963	0.0691842	0.0933653	0.155727	0.041185	0.0882745	0.0182766			0.963	-0.00208643	0.0806384	0.00554971	0.0157312	0.0793657	0.0259127			0.963	-0.00208643	0.0806384	0.103547	0.0513665	0.135364	0.0806384			0.963	0.16209	0.116274	0.10991			0.963	0.09337	0.24482	0.74371			0.963
	0.964	0.00936778	0.00300433	-0.0580848	0.0195493	-0.0211768	0.0284581			0.964	0.0755476	0.0755476	0.165909	0.0284581	0.0730023	0.0488212			0.964	0.0106405	0.0844565	0.00300433	0.0233674	0.0793657	0.0271854			0.964	0.0106405	0.0844565	0.111183	0.0590027	0.130273	0.0831838			0.964	0.153182	0.125183	0.101001			0.964	0.08318	0.22573	0.77044			0.964
	0.965	0.00809509	0.00554971	-0.0542667	0.0195493	-0.00463181	0.00554971			0.965	0.0730023	0.0819111	0.149364	0.0284581	0.0793657	0.041185			0.965	-0.00463181	0.0895472	0.0068224	0.0106405	0.0755476	0.0284581			0.965	-0.00463181	0.0895472	0.0984561	0.0551846	0.140455	0.0730023			0.965	0.168454	0.117546	0.0882745			0.965	0.08446	0.21936	0.76789			0.965
	0.966	0.0131859	0.0182766	-0.0542667	0.0297308	-0.00717719	0.00809509			0.966	0.074275	0.0793657	0.158273	0.0551846	0.0908199	0.0437304			0.966	0.000458949	0.094638	0.0246401	0.020822	0.0704569	0.0297308			0.966	0.000458949	0.094638	0.0997288	0.0450031	0.120092	0.0959107			0.966	0.165909	0.125183	0.0819111			0.966	0.07427	0.227	0.81498			0.966
	0.967	0.00936778	-0.00717719	-0.0619029	0.0259127	-0.0249948	0.0131859			0.967	0.0730023	0.0870019	0.160818	0.0513665	0.0819111	0.0335489			0.967	0.000458949	0.0920926	0.00809509	-0.00208643	0.0870019	0.0195493			0.967	0.000458949	0.0920926	0.0997288	0.0602754	0.140455	0.0844565			0.967	0.157	0.117546	0.0882745			0.967	0.09718	0.16336	0.79716			0.967
	0.968	0.0119132	0.0131859	-0.049176	0.0259127	-0.0122679	0.0119132			0.968	0.078093	0.0806384	0.155727	0.0310035	0.078093	0.0437304			0.968	0.00300433	0.102274	0.0068224	0.00809509	0.074275	0.0322762			0.968	0.00300433	0.102274	0.094638	0.0475485	0.132819	0.0793657			0.968	0.151909	0.130273	0.078093			0.968	0.08064	0.10991	0.80734			0.968
	0.969	0.0170039	-0.000813741	-0.0504486	0.0284581	-0.016086	0.0271854			0.969	0.0755476	0.0793657	0.154454	0.0310035	0.0653661	0.0513665			0.969	-0.0148133	0.0908199	0.00809509	-0.00463181	0.074275	0.0220947			0.969	-0.0148133	0.0908199	0.104819	0.0462758	0.140455	0.0768203			0.969	0.168454	0.139182	0.0959107			0.969	0.09846	0.11246	0.8048			0.969
	0.97	0.0106405	0.0106405	-0.052994	0.0284581	-0.016086	0.0144585			0.97	0.0819111	0.0768203	0.151909	0.0539119	0.0806384	0.0450031			0.97	-0.00208643	0.0971834	0.0233674	0.0157312	0.078093	0.0246401			0.97	-0.00208643	0.0971834	0.0984561	0.0590027	0.130273	0.0870019			0.97	0.154454	0.10991	0.0895472			0.97	0.08446	0.073	0.79716			0.97
	0.971	0.00300433	0.00809509	-0.0517213	0.0259127	-0.0135406	0.0131859			0.971	0.0819111	0.0895472	0.159545	0.041185	0.0908199	0.037367			0.971	0.00300433	0.0895472	0.0233674	0.0170039	0.0806384	0.0157312			0.971	0.00300433	0.0895472	0.0920926	0.0564573	0.127728	0.0793657			0.971	0.17609	0.130273	0.0895472			0.971	0.087	0.059	0.75262			0.971
	0.972	0.00173164	0.00300433	-0.052994	0.020822	-0.0224495	0.00554971			0.972	0.0819111	0.0870019	0.172272	0.0424577	0.0666388	0.0437304			0.972	0.00554971	0.0984561	0.0246401	0.0182766	0.0831838	0.0284581			0.972	0.00554971	0.0984561	0.10991	0.0424577	0.130273	0.0730023			0.972	0.150636	0.111183	0.0755476			0.972	0.08318	0.09718	0.69917			0.972
	0.973	0.0157312	-0.00717719	-0.0580848	0.0233674	-0.00844988	0.0182766			0.973	0.0679115	0.0679115	0.158273	0.041185	0.0806384	0.0259127			0.973	-0.00208643	0.094638	0.0157312	-0.00208643	0.0717296	0.0386396			0.973	-0.00208643	0.094638	0.104819	0.0424577	0.137909	0.0831838			0.973	0.163363	0.117546	0.0933653			0.973	0.08827	0.09591	0.67371			0.973
	0.974	-0.00335912	0.000458949	-0.0631755	0.0310035	-0.0173587	0.0246401			0.974	0.0819111	0.0691842	0.155727	0.0310035	0.0831838	0.0450031			0.974	0.00300433	0.0870019	0.0131859	0.0170039	0.078093	0.0386396			0.974	0.00300433	0.0870019	0.115001	0.0551846	0.125183	0.0704569			0.974	0.155727	0.122637	0.094638			0.974	0.07555	0.08955	0.65844			0.974
	0.975	0.0068224	0.00427702	-0.0440852	0.020822	-0.0122679	0.0233674			0.975	0.078093	0.0806384	0.154454	0.0526392	0.0793657	0.0386396			0.975	-0.00463181	0.078093	0.0157312	0.0170039	0.0691842	0.0170039			0.975	-0.00463181	0.078093	0.115001	0.0450031	0.129001	0.0768203			0.975	0.158273	0.115001	0.0984561			0.975	0.08827	0.13027	0.65462			0.975
	0.976	-0.00463181	-0.00463181	-0.0466306	0.0195493	-0.000813741	0.00173164			0.976	0.0819111	0.0895472	0.144273	0.0297308	0.0831838	0.0450031			0.976	-0.00972257	0.0882745	0.0233674	0.0220947	0.0793657	0.0259127			0.976	-0.00972257	0.0882745	0.111183	0.0564573	0.150636	0.0882745			0.976	0.144273	0.113728	0.0870019			0.976	0.08191	0.15318	0.63935			0.976
	0.977	0.00554971	0.00554971	-0.0440852	0.020822	-0.0237222	0.00936778			0.977	0.0730023	0.0768203	0.141728	0.0475485	0.0793657	0.0322762			0.977	-0.0135406	0.0831838	0.0144585	0.0068224	0.0882745	0.0195493			0.977	-0.0135406	0.0831838	0.113728	0.0539119	0.137909	0.078093			0.977	0.148091	0.120092	0.0959107			0.977	0.08191	0.19645	0.64826			0.977
	0.978	0.00554971	0.0170039	-0.052994	0.0170039	-0.00844988	0.0131859			0.978	0.0653661	0.078093	0.160818	0.0475485	0.0691842	0.0564573			0.978	0.0182766	0.0882745	0.0157312	0.0119132	0.0831838	0.020822			0.978	0.0182766	0.0882745	0.0971834	0.0500939	0.134091	0.0730023			0.978	0.151909	0.132819	0.094638			0.978	0.08955	0.21173	0.68008			0.978
	0.979	0.0233674	0.00427702	-0.0568121	0.0182766	-0.0339037	0.0106405			0.979	0.074275	0.0679115	0.155727	0.0386396	0.05773	0.0310035			0.979	0.00554971	0.0793657	0.0119132	0.0119132	0.0730023	0.0195493			0.979	0.00554971	0.0793657	0.108638	0.0628207	0.137909	0.0755476			0.979	0.168454	0.108638	0.0793657			0.979	0.08191	0.21427	0.68517			0.979
	0.98	0.00427702	0.00427702	-0.049176	0.0271854	-0.0173587	0.00300433			0.98	0.074275	0.0755476	0.158273	0.0259127	0.0793657	0.0526392			0.98	0.00936778	0.0920926	0.000458949	0.00809509	0.0730023	0.0220947			0.98	0.00936778	0.0920926	0.118819	0.0488212	0.131546	0.0679115			0.98	0.150636	0.117546	0.0984561			0.98	0.08446	0.23591	0.70935			0.98
	0.981	0.0068224	0.00173164	-0.0606302	0.0220947	-0.0199041	0.00300433			0.981	0.074275	0.0806384	0.160818	0.0526392	0.0793657	0.0233674			0.981	0.00936778	0.0844565	0.0144585	0.0233674	0.0640934	0.0170039			0.981	0.00936778	0.0844565	0.117546	0.0475485	0.155727	0.0959107			0.981	0.150636	0.120092	0.0870019			0.981	0.08955	0.21045	0.77044			0.981
	0.982	0.00809509	0.00809509	-0.0542667	0.0170039	-0.00844988	0.0220947			0.982	0.0730023	0.0793657	0.148091	0.0386396	0.0730023	0.0475485			0.982	0.000458949	0.101001	0.00936778	0.0170039	0.0857292	0.0271854			0.982	0.000458949	0.101001	0.104819	0.0488212	0.144273	0.0666388			0.982	0.144273	0.126455	0.0920926			0.982	0.08446	0.19773	0.7768			0.982
	0.983	0.00427702	0.00554971	-0.049176	0.0195493	-0.016086	0.0119132			0.983	0.0768203	0.074275	0.158273	0.0500939	0.074275	0.0437304			0.983	-0.00208643	0.0806384	0.020822	0.00554971	0.0793657	0.0195493			0.983	-0.00208643	0.0806384	0.113728	0.0513665	0.149364	0.0793657			0.983	0.145546	0.117546	0.078093			0.983	0.08191	0.16464	0.79971			0.983
	0.984	0.00936778	0.0195493	-0.049176	0.0144585	-0.0199041	0.00809509			0.984	0.0666388	0.074275	0.159545	0.037367	0.094638	0.0462758			0.984	-0.0135406	0.0870019	0.00809509	0.0144585	0.0819111	0.00809509			0.984	-0.0135406	0.0870019	0.121365	0.0526392	0.139182	0.0844565			0.984	0.153182	0.118819	0.0984561			0.984	0.06918	0.129	0.7908			0.984
	0.985	0.0106405	0.0144585	-0.0402671	0.0119132	-0.0300856	0.00300433			0.985	0.074275	0.0730023	0.150636	0.037367	0.05773	0.0310035			0.985	-0.00717719	0.104819	0.0144585	0.00809509	0.074275	0.0182766			0.985	-0.00717719	0.104819	0.10991	0.0691842	0.150636	0.078093			0.985	0.150636	0.107365	0.0806384			0.985	0.08446	0.12646	0.77425			0.985
	0.986	0.0119132	-0.00844988	-0.0644482	0.0195493	-0.0262675	0.00427702			0.986	0.0640934	0.0768203	0.145546	0.0233674	0.0882745	0.0462758			0.986	-0.0135406	0.102274	0.00554971	0.0157312	0.0831838	0.0310035			0.986	-0.0135406	0.102274	0.122637	0.0768203	0.143	0.0730023			0.986	0.150636	0.116274	0.0895472			0.986	0.08446	0.08064	0.75516			0.986
	0.987	0.00427702	0.0106405	-0.036449	0.0220947	-0.0148133	0.0233674			0.987	0.0666388	0.0768203	0.145546	0.0297308	0.0640934	0.0450031			0.987	-0.00717719	0.0882745	0.0106405	0.00300433	0.0793657	0.0360943			0.987	-0.00717719	0.0882745	0.120092	0.0526392	0.148091	0.0831838			0.987	0.132819	0.106092	0.0844565			0.987	0.07682	0.06537	0.75644			0.987
	0.988	0.00300433	0.0259127	-0.052994	0.0157312	-0.0122679	0.0131859			0.988	0.0717296	0.0768203	0.141728	0.0271854	0.0806384	0.0437304			0.988	0.00300433	0.0959107	0.0322762	0.0106405	0.078093	0.0246401			0.988	0.00300433	0.0959107	0.108638	0.0513665	0.145546	0.0857292			0.988	0.145546	0.125183	0.0870019			0.988	0.07937	0.07555	0.73226			0.988
	0.989	0.0106405	0.000458949	-0.0619029	0.0182766	-0.0224495	0.0157312			0.989	0.0679115	0.074275	0.155727	0.0450031	0.0857292	0.0399123			0.989	0.00809509	0.0971834	-0.00335912	0.0157312	0.0831838	0.0195493			0.989	0.00809509	0.0971834	0.116274	0.0513665	0.151909	0.0895472			0.989	0.145546	0.118819	0.0768203			0.989	0.08446	0.073	0.68771			0.989
	0.99	0.00554971	-0.00208643	-0.0517213	0.0182766	-0.0135406	0.0131859			0.99	0.0704569	0.0704569	0.16209	0.0564573	0.0704569	0.0539119			0.99	-0.00208643	0.0908199	0.0195493	0.0182766	0.0806384	0.0195493			0.99	-0.00208643	0.0908199	0.106092	0.0564573	0.160818	0.0679115			0.99	0.136637	0.125183	0.0971834			0.99	0.08318	0.10864	0.64444			0.99
	0.991	-0.0122679	0.00554971	-0.0555394	0.0259127	-0.0186314	0.00809509			0.991	0.0844565	0.074275	0.155727	0.0233674	0.0730023	0.0437304			0.991	-0.00972257	0.0933653	0.020822	0.00554971	0.0819111	0.0170039			0.991	-0.00972257	0.0933653	0.112456	0.0526392	0.145546	0.0908199			0.991	0.146818	0.0908199	0.0819111			0.991	0.07427	0.14045	0.64062			0.991
	0.992	0.00554971	0.0182766	-0.0568121	0.0233674	-0.0059045	0.0170039			0.992	0.0666388	0.0730023	0.135364	0.0513665	0.0691842	0.0322762			0.992	0.00554971	0.0971834	0.0131859	0.00300433	0.0691842	0.0220947			0.992	0.00554971	0.0971834	0.117546	0.0640934	0.159545	0.0895472			0.992	0.136637	0.113728	0.0857292			0.992	0.09082	0.17227	0.65462			0.992
	0.993	0.0106405	0.0106405	-0.0402671	0.00809509	-0.0224495	0.00300433			0.993	0.0755476	0.074275	0.154454	0.0348216	0.0691842	0.0424577			0.993	-0.00717719	0.0895472	0.00300433	0.0068224	0.078093	0.0271854			0.993	-0.00717719	0.0895472	0.0920926	0.0691842	0.144273	0.0768203			0.993	0.140455	0.132819	0.0806384			0.993	0.08955	0.22573	0.64826			0.993
	0.994	-0.0109953	0.00427702	-0.0517213	0.0297308	-0.0122679	0.00809509			0.994	0.061548	0.0730023	0.158273	0.0348216	0.0755476	0.0386396			0.994	-0.000813741	0.0984561	0.0119132	0.00300433	0.078093	0.020822			0.994	-0.000813741	0.0984561	0.116274	0.061548	0.155727	0.0895472			0.994	0.136637	0.10991	0.0793657			0.994	0.09209	0.21936	0.65717			0.994
	0.995	-0.00208643	0.0068224	-0.0440852	0.0348216	-0.0122679	0.0131859			0.995	0.0730023	0.0691842	0.149364	0.0182766	0.0831838	0.0399123			0.995	-0.000813741	0.0984561	0.0182766	0.0144585	0.0908199	0.0271854			0.995	-0.000813741	0.0984561	0.108638	0.0475485	0.154454	0.0717296			0.995	0.131546	0.115001	0.0908199			0.995	0.07555	0.24863	0.71062			0.995
	0.996	-0.00208643	0.00300433	-0.0644482	0.0310035	-0.0275402	-0.00208643			0.996	0.0679115	0.0602754	0.155727	0.0297308	0.0691842	0.0475485			0.996	-0.00972257	0.0984561	0.0220947	-0.00463181	0.0768203	0.0195493			0.996	-0.00972257	0.0984561	0.106092	0.0717296	0.173545	0.0870019			0.996	0.148091	0.121365	0.0831838			0.996	0.09082	0.25118	0.7208			0.996
	0.997	0.00300433	0.0106405	-0.052994	0.0157312	-0.0186314	0.0131859			0.997	0.0679115	0.0628207	0.155727	0.0297308	0.05773	0.0386396			0.997	-0.00972257	0.115001	0.0195493	0.0106405	0.0730023	0.00809509			0.997	-0.00972257	0.115001	0.117546	0.0488212	0.140455	0.0806384			0.997	0.131546	0.103547	0.0704569			0.997	0.08446	0.24863	0.78698			0.997
	0.998	0.0068224	0.00173164	-0.0555394	0.0233674	-0.00717719	0.0233674			0.998	0.074275	0.0704569	0.153182	0.0195493	0.0691842	0.0450031			0.998	-0.0173587	0.129001	-0.00208643	0.00809509	0.0653661	0.0170039			0.998	-0.0173587	0.129001	0.113728	0.0602754	0.149364	0.0806384			0.998	0.121365	0.107365	0.078093			0.998	0.09082	0.24991	0.80862			0.998
	0.999	0.00427702	0.00300433	-0.049176	0.0170039	-0.032631	0.00809509			0.999	0.0717296	0.0691842	0.155727	0.0297308	0.0717296	0.0437304			0.999	-0.00717719	0.116274	0.020822	0.0119132	0.094638	0.00300433			0.999	-0.00717719	0.116274	0.112456	0.0551846	0.145546	0.106092			0.999	0.120092	0.112456	0.0920926			0.999	0.07173	0.20663	0.82134			0.999
	1	-0.0122679	0.00427702	-0.0580848	0.0068224	-0.00717719	0.00427702			1	0.0653661	0.0640934	0.148091	0.0360943	0.0640934	0.0424577			1	-0.000813741	0.108638	0.00936778	0.0119132	0.0857292	0.0144585			1	-0.000813741	0.108638	0.118819	0.0513665	0.144273	0.0870019			1	0.126455	0.108638	0.0959107			1	0.09337	0.15318	0.86971			1
	1.001	0.0119132	0.00427702	-0.052994	0.0310035	-0.0109953	-0.000813741			1.001	0.0768203	0.0602754	0.146818	0.0386396	0.05773	0.0284581			1.001	-0.0173587	0.0870019	-0.00208643	0.00809509	0.0870019	0.0297308			1.001	-0.0173587	0.0870019	0.102274	0.0513665	0.149364	0.0806384			1.001	0.144273	0.121365	0.0870019			1.001	0.07937	0.13027	0.85825			1.001
	1.002	0.00554971	-0.0122679	-0.0631755	0.0144585	-0.00844988	0.0119132			1.002	0.0691842	0.05773	0.139182	0.0195493	0.0717296	0.037367			1.002	-0.0122679	0.094638	0.0310035	0.0170039	0.0793657	0.020822			1.002	-0.0122679	0.094638	0.103547	0.0551846	0.139182	0.0959107			1.002	0.115001	0.111183	0.074275			1.002	0.08446	0.11118	0.82898			1.002
	1.003	-0.000813741	0.00173164	-0.0466306	0.020822	-0.00844988	0.00300433			1.003	0.0679115	0.061548	0.150636	0.037367	0.0628207	0.0220947			1.003	-0.0059045	0.0997288	0.000458949	0.00809509	0.0895472	0.00936778			1.003	-0.0059045	0.0997288	0.10991	0.078093	0.132819	0.0844565			1.003	0.143	0.106092	0.0882745			1.003	0.09464	0.07427	0.82898			1.003
	1.004	0.00809509	0.0119132	-0.0555394	0.0348216	-0.0148133	0.0119132			1.004	0.078093	0.0551846	0.137909	0.0144585	0.0526392	0.037367			1.004	-0.0135406	0.0844565	0.0106405	-0.016086	0.0857292	0.0144585			1.004	-0.0135406	0.0844565	0.0997288	0.0666388	0.153182	0.078093			1.004	0.130273	0.115001	0.0755476			1.004	0.06918	0.07809	0.76789			1.004
	1.005	0.000458949	-0.0059045	-0.0542667	0.020822	-0.0186314	0.0170039			1.005	0.0679115	0.0679115	0.137909	0.037367	0.061548	0.0450031			1.005	0.00300433	0.0882745	0.0182766	0.0233674	0.0908199	0.00554971			1.005	0.00300433	0.0882745	0.120092	0.0768203	0.160818	0.078093			1.005	0.125183	0.102274	0.0831838			1.005	0.08955	0.06409	0.71698			1.005
	1.006	0.0119132	-0.000813741	-0.0568121	0.0131859	-0.0148133	0.020822			1.006	0.0628207	0.0590027	0.137909	0.0182766	0.0602754	0.0284581			1.006	0.00809509	0.0870019	0.0144585	-0.000813741	0.078093	-0.00463181			1.006	0.00809509	0.0870019	0.0997288	0.0870019	0.144273	0.0997288			1.006	0.116274	0.103547	0.0844565			1.006	0.08318	0.09464	0.71953			1.006
	1.007	0.00300433	0.0068224	-0.0542667	0.0144585	-0.0135406	-0.00844988			1.007	0.0640934	0.0539119	0.134091	0.0271854	0.078093	0.041185			1.007	0.000458949	0.0857292	0.0119132	0.0284581	0.0895472	0.0259127			1.007	0.000458949	0.0857292	0.107365	0.0653661	0.148091	0.0908199			1.007	0.10991	0.0971834	0.0793657			1.007	0.07937	0.08191	0.70171			1.007
	1.008	0.0131859	0.00936778	-0.052994	0.0170039	-0.0224495	0.0131859			1.008	0.0666388	0.05773	0.149364	0.00300433	0.0590027	0.041185			1.008	-0.00844988	0.0640934	-0.00208643	0.0119132	0.0870019	0.0271854			1.008	-0.00844988	0.0640934	0.0971834	0.0640934	0.132819	0.0920926			1.008	0.118819	0.10991	0.0730023			1.008	0.08827	0.12009	0.66608			1.008
	1.009	0.00936778	0.00300433	-0.0555394	0.0131859	-0.00208643	0.000458949			1.009	0.0717296	0.0602754	0.141728	0.0297308	0.0730023	0.0246401			1.009	-0.0122679	0.0691842	0.0157312	0.00173164	0.0679115	0.0144585			1.009	-0.0122679	0.0691842	0.101001	0.05773	0.140455	0.0831838			1.009	0.118819	0.112456	0.0691842			1.009	0.087	0.16718	0.68517			1.009
	1.01	-0.00335912	-0.000813741	-0.0542667	0.0233674	-0.0224495	0.00173164			1.01	0.0640934	0.0602754	0.136637	0.0259127	0.0475485	0.0157312			1.01	-0.0122679	0.0920926	0.0220947	-0.00717719	0.0882745	-0.00208643			1.01	-0.0122679	0.0920926	0.0831838	0.0653661	0.131546	0.0819111			1.01	0.111183	0.102274	0.0819111			1.01	0.087	0.22063	0.67371			1.01
	1.011	-0.00844988	-0.0059045	-0.0631755	0.0144585	-0.00717719	0.00554971			1.011	0.0691842	0.0539119	0.127728	0.0284581	0.0526392	0.0399123			1.011	-0.00717719	0.0819111	0.00173164	-0.00208643	0.0857292	0.00427702			1.011	-0.00717719	0.0819111	0.0984561	0.0590027	0.153182	0.0882745			1.011	0.12391	0.106092	0.0730023			1.011	0.08573	0.22827	0.71062			1.011
	1.012	0.00554971	0.00809509	-0.0288129	0.0170039	-0.0109953	-0.00463181			1.012	0.074275	0.041185	0.145546	0.0297308	0.0755476	0.0144585			1.012	-0.0059045	0.0933653	0.00300433	0.00300433	0.0857292	0.0106405			1.012	-0.0059045	0.0933653	0.0844565	0.0691842	0.145546	0.0704569			1.012	0.112456	0.0920926	0.0602754			1.012	0.07427	0.23082	0.70298			1.012
	1.013	-0.00208643	0.0170039	-0.0479033	0.0233674	-0.0135406	0.00554971			1.013	0.061548	0.041185	0.140455	0.0170039	0.0551846	0.0475485			1.013	-0.00717719	0.0870019	0.0144585	0.00554971	0.0793657	0.020822			1.013	-0.00717719	0.0870019	0.0793657	0.0526392	0.148091	0.0806384			1.013	0.101001	0.0997288	0.078093			1.013	0.07682	0.22445	0.74753			1.013
	1.014	0.00554971	-0.00844988	-0.073357	0.0131859	-0.0122679	0.00554971			1.014	0.0640934	0.0564573	0.135364	0.0271854	0.05773	0.020822			1.014	-0.0122679	0.094638	0.00809509	0.0131859	0.094638	0.0119132			1.014	-0.0122679	0.094638	0.0691842	0.0590027	0.126455	0.0882745			1.014	0.111183	0.103547	0.0857292			1.014	0.07809	0.24609	0.82007			1.014
	1.015	-0.000813741	0.0068224	-0.0619029	0.0157312	-0.00335912	0.00936778			1.015	0.0640934	0.0500939	0.139182	0.0119132	0.0526392	0.0195493			1.015	-0.0173587	0.0882745	0.0131859	-0.00463181	0.0793657	0.00936778			1.015	-0.0173587	0.0882745	0.0819111	0.0755476	0.131546	0.0730023			1.015	0.108638	0.10991	0.0806384			1.015	0.09464	0.22191	0.83662			1.015
	1.016	0.0068224	-0.00335912	-0.0479033	0.00936778	-0.0059045	-0.00972257			1.016	0.0628207	0.0488212	0.121365	0.0144585	0.0488212	0.0488212			1.016	-0.0224495	0.116274	0.0284581	0.000458949	0.0717296	-0.000813741			1.016	-0.0224495	0.116274	0.0640934	0.0602754	0.118819	0.0882745			1.016	0.115001	0.107365	0.0793657			1.016	0.08318	0.21936	0.8468			1.016
	1.017	-0.00208643	-0.00972257	-0.0517213	0.0131859	-0.016086	0.0144585			1.017	0.0666388	0.0526392	0.131546	0.0131859	0.0653661	0.0119132			1.017	-0.000813741	0.12391	0.00427702	-0.000813741	0.0806384	0.00936778			1.017	-0.000813741	0.12391	0.0806384	0.0653661	0.115001	0.0666388			1.017	0.094638	0.111183	0.0819111			1.017	0.08064	0.18882	0.87225			1.017
	1.018	-0.00208643	0.0068224	-0.0428125	0.0157312	-0.0211768	0.00809509			1.018	0.0653661	0.0513665	0.135364	0.0271854	0.0602754	0.0284581			1.018	-0.0237222	0.120092	-0.00208643	0.0106405	0.0895472	0.0068224			1.018	-0.0237222	0.120092	0.0602754	0.0755476	0.10991	0.074275			1.018	0.111183	0.107365	0.0679115			1.018	0.09337	0.13664	0.85952			1.018
	1.019	-0.00208643	0.00173164	-0.049176	0.0119132	-0.00844988	-0.0059045			1.019	0.0679115	0.0437304	0.141728	0.0386396	0.0628207	0.0348216			1.019	0.00173164	0.10991	0.0106405	0.00554971	0.0793657	-0.00463181			1.019	0.00173164	0.10991	0.0564573	0.0717296	0.129001	0.0844565			1.019	0.101001	0.0971834	0.061548			1.019	0.08955	0.11373	0.89516			1.019
	1.02	0.00427702	-0.00208643	-0.0504486	0.0195493	-0.0199041	0.00936778			1.02	0.0704569	0.0399123	0.120092	0.0246401	0.0399123	0.020822			1.02	-0.0186314	0.0959107	0.0119132	-0.0135406	0.0793657	-0.00335912			1.02	-0.0186314	0.0959107	0.0590027	0.0628207	0.134091	0.0895472			1.02	0.101001	0.113728	0.0755476			1.02	0.08827	0.09973	0.85698			1.02
	1.021	-0.000813741	0.00809509	-0.0542667	0.0131859	-0.00844988	0.000458949			1.021	0.0691842	0.0399123	0.126455	0.0170039	0.0424577	0.0246401			1.021	-0.0109953	0.101001	0.0131859	0.00427702	0.074275	0.0131859			1.021	-0.0109953	0.101001	0.0488212	0.0717296	0.0895472	0.0831838			1.021	0.10991	0.0908199	0.0691842			1.021	0.08446	0.09846	0.82134			1.021
	1.022	0.00173164	0.00427702	-0.0568121	0.00554971	-0.0224495	0.00809509			1.022	0.05773	0.0399123	0.137909	0.0182766	0.0691842	0.00809509			1.022	-0.00463181	0.094638	0.00427702	-0.00972257	0.0920926	0.00173164			1.022	-0.00463181	0.094638	0.05773	0.0653661	0.0933653	0.0806384			1.022	0.0959107	0.0984561	0.0704569			1.022	0.09464	0.09846	0.7908			1.022
	1.023	-0.00208643	-0.00844988	-0.0568121	0.0348216	-0.0148133	0.00809509			1.023	0.061548	0.0475485	0.116274	0.00936778	0.0513665	0.0220947			1.023	-0.00844988	0.0844565	0.00936778	0.0157312	0.0857292	0.0131859			1.023	-0.00844988	0.0844565	0.0335489	0.074275	0.108638	0.0730023			1.023	0.0933653	0.104819	0.0628207			1.023	0.07682	0.12264	0.74244			1.023
	1.024	0.00936778	-0.0122679	-0.0542667	0.0170039	-0.0109953	0.00300433			1.024	0.0640934	0.0437304	0.151909	0.037367	0.0513665	0.0310035			1.024	-0.0059045	0.104819	0.00936778	0.00427702	0.0844565	0.00554971			1.024	-0.0059045	0.104819	0.0360943	0.0666388	0.0870019	0.0768203			1.024	0.101001	0.0997288	0.0679115			1.024	0.08191	0.14173	0.73098			1.024
	1.025	-0.00844988	0.00554971	-0.052994	0.0144585	-0.0109953	0.00427702			1.025	0.0704569	0.0450031	0.122637	0.0233674	0.0590027	0.0271854			1.025	-0.032631	0.0870019	0.0106405	-0.00335912	0.0844565	0.00300433			1.025	-0.032631	0.0870019	0.0424577	0.0679115	0.0870019	0.0730023			1.025	0.0997288	0.0870019	0.0755476			1.025	0.09082	0.17991	0.73353			1.025
	1.026	0.0068224	0.000458949	-0.0606302	-0.000813741	-0.0211768	0.00809509			1.026	0.061548	0.0322762	0.127728	0.0119132	0.0513665	0.0271854			1.026	-0.00335912	0.0908199	0.0220947	-0.00463181	0.0730023	0.00809509			1.026	-0.00335912	0.0908199	0.0322762	0.0653661	0.078093	0.0971834			1.026	0.0933653	0.0933653	0.0691842			1.026	0.09082	0.23082	0.72716			1.026
	1.027	-0.00208643	-0.00208643	-0.0428125	0.020822	-0.00335912	-0.00335912			1.027	0.0602754	0.0284581	0.113728	0.0144585	0.0513665	0.0297308			1.027	-0.000813741	0.0920926	0.0068224	0.00809509	0.0793657	0.00300433			1.027	-0.000813741	0.0920926	0.0284581	0.0500939	0.0933653	0.0768203			1.027	0.0793657	0.0971834	0.0793657			1.027	0.06918	0.23082	0.74626			1.027
	1.028	-0.00208643	0.00300433	-0.0542667	-0.00463181	-0.0135406	-0.000813741			1.028	0.0602754	0.037367	0.130273	0.0322762	0.0462758	0.0068224			1.028	-0.0199041	0.104819	0.0182766	0.00300433	0.0895472	0.000458949			1.028	-0.0199041	0.104819	0.0322762	0.0806384	0.0793657	0.0870019			1.028	0.0908199	0.0971834	0.0704569			1.028	0.07682	0.27663	0.7768			1.028
	1.029	-0.0148133	0.00936778	-0.052994	0.0322762	-0.0186314	-0.0148133			1.029	0.0691842	0.0450031	0.116274	0.0220947	0.0539119	0.0157312			1.029	-0.0148133	0.10991	0.0157312	0.0106405	0.0819111	0.0170039			1.029	-0.0148133	0.10991	0.0310035	0.0640934	0.0691842	0.0704569			1.029	0.0844565	0.0908199	0.074275			1.029	0.07173	0.28045	0.7768			1.029
	1.03	0.00300433	-0.00208643	-0.0631755	0.00936778	-0.0059045	-0.00335912			1.03	0.0564573	0.0437304	0.102274	0.0157312	0.0526392	0.05773			1.03	-0.0173587	0.0984561	-0.00972257	-0.000813741	0.0730023	-0.00844988			1.03	-0.0173587	0.0984561	0.00173164	0.0526392	0.0895472	0.0640934			1.03	0.0895472	0.0984561	0.0691842			1.03	0.08191	0.26772	0.81244			1.03
	1.031	-0.0122679	0.00809509	-0.0580848	0.0144585	-0.0199041	0.0119132			1.031	0.0539119	0.0310035	0.125183	0.0157312	0.0666388	0.0195493			1.031	-0.0122679	0.0870019	0.0170039	-0.000813741	0.0857292	0.0220947			1.031	-0.0122679	0.0870019	0.0170039	0.0513665	0.074275	0.0730023			1.031	0.0895472	0.107365	0.0602754			1.031	0.09209	0.24227	0.82134			1.031
	1.032	0.000458949	-0.00463181	-0.0504486	0.000458949	-0.0122679	0.00554971			1.032	0.0679115	0.0335489	0.10991	0.0157312	0.0526392	0.0195493			1.032	-0.00717719	0.126455	0.00427702	0.000458949	0.0844565	0.0246401			1.032	-0.00717719	0.126455	0.00936778	0.0500939	0.0488212	0.078093			1.032	0.0933653	0.0908199	0.061548			1.032	0.07937	0.24736	0.85571			1.032
	1.033	-0.00208643	-0.00717719	-0.0606302	0.0106405	-0.0109953	-0.00208643			1.033	0.0730023	0.0360943	0.126455	0.0182766	0.0488212	0.0233674			1.033	-0.0249948	0.153182	0.00554971	-0.00972257	0.0857292	0.00173164			1.033	-0.0249948	0.153182	0.00809509	0.0539119	0.0640934	0.0768203			1.033	0.0819111	0.0717296	0.0551846			1.033	0.07937	0.19009	0.89261			1.033
	1.034	0.0068224	-0.000813741	-0.0428125	-0.00335912	-0.00972257	-0.00335912			1.034	0.0691842	0.0271854	0.112456	0.0157312	0.0488212	0.0437304			1.034	-0.0224495	0.167181	0.0106405	0.0106405	0.0717296	-0.00208643			1.034	-0.0224495	0.167181	0.0068224	0.0564573	0.0590027	0.0793657			1.034	0.0806384	0.0933653	0.0679115			1.034	0.08446	0.18373	0.86589			1.034
	1.035	-0.00972257	0.000458949	-0.0517213	0.0131859	-0.032631	-0.0059045			1.035	0.05773	0.0335489	0.125183	0.0170039	0.0590027	0.0119132			1.035	-0.016086	0.146818	0.0182766	0.00936778	0.0679115	-0.00463181			1.035	-0.016086	0.146818	0.00936778	0.0462758	0.0590027	0.0819111			1.035	0.0679115	0.0959107	0.0691842			1.035	0.08573	0.13664	0.86462			1.035
	1.036	-0.00208643	0.00300433	-0.0644482	-0.00463181	-0.00208643	-0.000813741			1.036	0.0513665	0.037367	0.117546	0.0233674	0.0488212	0.0246401			1.036	-0.0173587	0.121365	0.00936778	0.0068224	0.0717296	0.00936778			1.036	-0.0173587	0.121365	-0.00463181	0.0564573	0.0526392	0.0768203			1.036	0.0755476	0.0997288	0.0488212			1.036	0.08827	0.10227	0.85189			1.036
	1.037	-0.00335912	0.00173164	-0.069539	0.0233674	-0.0173587	-0.0224495			1.037	0.0590027	0.0360943	0.120092	0.0220947	0.0424577	0.0335489			1.037	-0.0199041	0.116274	-0.000813741	0.0131859	0.0882745	0.0195493			1.037	-0.0199041	0.116274	-0.0122679	0.0551846	0.0500939	0.0666388			1.037	0.0793657	0.0895472	0.0590027			1.037	0.09718	0.10991	0.82134			1.037
	1.038	0.0195493	0.0131859	-0.0517213	0.0068224	-0.0135406	0.00300433			1.038	0.0564573	0.0360943	0.111183	0.0170039	0.0551846	0.0157312			1.038	0.00173164	0.107365	0.0131859	-0.016086	0.0717296	0.0233674			1.038	0.00173164	0.107365	-0.0173587	0.0450031	0.0424577	0.074275			1.038	0.0806384	0.0933653	0.0640934			1.038	0.08827	0.101	0.77553			1.038
	1.039	0.0144585	0.00427702	-0.0593575	0.00300433	-0.0059045	0.00300433			1.039	0.0539119	0.0386396	0.116274	0.0259127	0.0602754	0.0233674			1.039	-0.0186314	0.101001	0.0182766	0.00300433	0.0844565	0.0119132			1.039	-0.0186314	0.101001	-0.0313583	0.05773	0.0297308	0.074275			1.039	0.0704569	0.0844565	0.0628207			1.039	0.07937	0.10355	0.76025			1.039
	1.04	-0.00463181	0.00173164	-0.0466306	0.0106405	-0.00972257	-0.000813741			1.04	0.0539119	0.0297308	0.112456	0.0195493	0.0666388	0.0271854			1.04	-0.0122679	0.0971834	0.00936778	-0.00463181	0.0806384	0.0144585			1.04	-0.0122679	0.0971834	-0.00844988	0.0437304	0.0564573	0.0895472			1.04	0.0908199	0.0691842	0.061548			1.04	0.08064	0.09718	0.7208			1.04
	1.041	-0.0059045	-0.00717719	-0.0619029	0.0144585	-0.0122679	-0.000813741			1.041	0.061548	0.0360943	0.113728	0.0131859	0.0513665	0.0271854			1.041	-0.0109953	0.0691842	0.020822	0.0119132	0.074275	0.0182766			1.041	-0.0109953	0.0691842	-0.0148133	0.0590027	0.0437304	0.0679115			1.041	0.0717296	0.0959107	0.0564573			1.041	0.08955	0.12518	0.69535			1.041
	1.042	-0.016086	-0.0148133	-0.069539	0.0144585	-0.016086	-0.00463181			1.042	0.0628207	0.0399123	0.121365	0.0297308	0.05773	0.0068224			1.042	-0.0237222	0.0475485	0.0106405	0.0131859	0.0717296	0.00809509			1.042	-0.0237222	0.0475485	-0.0249948	-0.339349	0.037367	0.0691842			1.042	0.0628207	0.0959107	0.05773			1.042	0.09209	0.21045	0.69535			1.042
	1.043	0.00936778	0.00936778	-0.0504486	-0.000813741	-0.0173587	-0.00463181			1.043	0.05773	0.0297308	0.116274	0.0335489	0.0602754	0.037367			1.043	-0.00717719	0.05773	0.0106405	0.00809509	0.0653661	0.020822			1.043	-0.00717719	0.05773	-0.0428125	-6.52717	0.0360943	0.0730023			1.043	0.0539119	0.0666388	0.0602754			1.043	0.07427	0.21045	0.68898			1.043
	1.044	0.00554971	-0.00335912	-0.0593575	-0.000813741	-0.016086	0.00427702			1.044	0.0628207	0.0220947	0.129001	0.0119132	0.0551846	0.0068224			1.044	-0.0148133	0.0424577	0.0182766	-0.00208643	0.0959107	0.0131859			1.044	-0.0148133	0.0424577	-0.036449	-9.23291	0.0437304	0.0730023			1.044	0.0806384	0.0831838	0.0640934			1.044	0.08955	0.21682	0.7208			1.044
	1.045	-0.0148133	-0.000813741	-0.0631755	0.00427702	-0.0059045	0.00173164			1.045	0.05773	0.0297308	0.116274	0.0182766	0.0768203	0.0297308			1.045	-0.0122679	0.0564573	-0.0059045	0.0144585	0.0895472	0.0271854			1.045	-0.0122679	0.0564573	-0.0186314	-9.23418	0.020822	0.0679115			1.045	0.0666388	0.102274	0.05773			1.045	0.09082	0.27281	0.71953			1.045
	1.046	-0.0199041	-0.0122679	-0.0657209	0.00300433	-0.0211768	-0.0059045			1.046	0.061548	0.0322762	0.108638	0.0297308	0.0653661	0.0437304			1.046	-0.0122679	0.0526392	0.00936778	-0.0135406	0.0730023	0.0233674			1.046	-0.0122679	0.0526392	-0.0313583	-8.55456	0.0119132	0.0602754			1.046	0.0704569	0.094638	0.0475485			1.046	0.07555	0.26772	0.75771			1.046
	1.047	0.0131859	-0.000813741	-0.049176	0.00554971	-0.0199041	0.00300433			1.047	0.0526392	0.0360943	0.108638	0.0157312	0.061548	0.0246401			1.047	-0.0059045	0.0653661	0.0068224	-0.000813741	0.0640934	0.0195493			1.047	-0.0059045	0.0653661	-0.0479033	-7.87367	0.0170039	0.0920926			1.047	0.0640934	0.0984561	0.0691842			1.047	0.07809	0.26772	0.79334			1.047
	1.048	-0.000813741	-0.00335912	-0.052994	0.0182766	-0.0109953	0.0068224			1.048	0.0564573	0.0437304	0.120092	0.0284581	0.0475485	0.0335489			1.048	-0.00717719	0.0513665	0.0119132	-0.00335912	0.078093	0.00427702			1.048	-0.00717719	0.0513665	-0.0619029	-5.72537	0.0233674	0.0539119			1.048	0.0628207	0.0819111	0.078093			1.048	0.08191	0.28554	0.81753			1.048
	1.049	-0.00208643	0.0119132	-0.0542667	-0.000813741	-0.0148133	-0.0135406			1.049	0.05773	0.0348216	0.113728	0.0233674	0.0590027	0.0284581			1.049	0.0068224	0.0640934	0.00173164	0.0182766	0.0819111	0.0259127			1.049	0.0068224	0.0640934	-0.0428125	-5.33211	0.0360943	0.078093			1.049	0.0768203	0.0882745	0.061548			1.049	0.06409	0.24609	0.83662			1.049
	1.05	0.00554971	-0.00463181	-0.0644482	-0.00208643	-0.00844988	-0.0122679			1.05	0.0679115	0.037367	0.118819	0.0271854	0.0666388	0.0348216			1.05	-0.00972257	0.074275	0.00173164	-0.00463181	0.0806384	0.0259127			1.05	-0.00972257	0.074275	-0.016086	-4.51759	0.0246401	0.0679115			1.05	0.074275	0.0793657	0.0602754			1.05	0.073	0.17864	0.86971			1.05
	1.051	0.0068224	-0.000813741	-0.0542667	-0.00208643	-0.0173587	0.00809509			1.051	0.0500939	0.0360943	0.10991	0.0284581	0.0602754	0.0170039			1.051	-0.00335912	0.0640934	0.00809509	0.00554971	0.0819111	0.0220947			1.051	-0.00335912	0.0640934	-0.0173587	-2.63401	0.0246401	0.0730023			1.051	0.0590027	0.0882745	0.0730023			1.051	0.07173	0.15064	0.85825			1.051
	1.052	0.00936778	0.00173164	-0.0619029	-0.00844988	-0.0059045	-0.0109953			1.052	0.0653661	0.0259127	0.113728	0.0157312	0.0691842	0.0437304			1.052	-0.0186314	0.0602754	0.0068224	-0.0059045	0.0844565	0.0170039			1.052	-0.0186314	0.0602754	-0.0580848	-1.48859	0.0157312	0.0768203			1.052	0.0691842	0.0882745	0.0666388			1.052	0.07555	0.129	0.85698			1.052
	1.053	-0.0122679	0.00300433	-0.0631755	0.00427702	-0.0199041	0.00809509			1.053	0.0539119	0.0271854	0.120092	0.0259127	0.0730023	0.0157312			1.053	-0.0059045	0.0666388	0.0220947	0.0195493	0.0704569	0.0144585			1.053	-0.0059045	0.0666388	-0.036449	-0.62825	0.0335489	0.0755476			1.053	0.0640934	0.0679115	0.0462758			1.053	0.07427	0.12518	0.82643			1.053
	1.054	0.00173164	-0.00208643	-0.049176	0.00936778	-0.00844988	0.00554971			1.054	0.0564573	0.0284581	0.115001	0.00936778	0.0666388	0.0386396			1.054	0.00554971	0.0793657	0.0259127	0.0068224	0.0819111	0.0195493			1.054	0.00554971	0.0793657	-0.0237222	-0.12681	0.0297308	0.0653661			1.054	0.0640934	0.0730023	0.0602754			1.054	0.08446	0.12136	0.8048			1.054
	1.055	0.00300433	-0.0122679	-0.0606302	-0.0059045	-0.0224495	0.00173164			1.055	0.0602754	0.0322762	0.107365	0.041185	0.0539119	0.0360943			1.055	-0.00717719	0.0691842	-0.00208643	-0.0059045	0.0730023	0.00936778			1.055	-0.00717719	0.0691842	-0.032631	0.0793657	0.0297308	0.0819111			1.055	0.061548	0.0793657	0.061548			1.055	0.07555	0.09846	0.76407			1.055
	1.056	0.00936778	-0.0224495	-0.052994	0.00173164	-0.0122679	-0.0173587			1.056	0.0539119	0.0322762	0.108638	0.020822	0.0819111	0.0284581			1.056	-0.0059045	0.0870019	0.0157312	0.0068224	0.0704569	0.0386396			1.056	-0.0059045	0.0870019	-0.0186314	0.212998	0.0475485	0.0857292			1.056	0.0653661	0.0882745	0.0666388			1.056	0.08191	0.10482	0.71571			1.056
	1.057	0.00809509	-0.0173587	-0.0402671	0.00300433	-0.0199041	-0.000813741			1.057	0.0602754	0.0399123	0.12391	0.037367	0.0640934	0.0297308			1.057	0.00173164	0.0679115	0.0131859	-0.0059045	0.0666388	0.0220947			1.057	0.00173164	0.0679115	-0.0249948	0.281723	0.0322762	0.0730023			1.057	0.0971834	0.0806384	0.0551846			1.057	0.08064	0.12646	0.71062			1.057
	1.058	-0.0148133	-0.000813741	-0.0606302	-0.00208643	-0.0211768	-0.016086			1.058	0.0653661	0.0348216	0.104819	0.0322762	0.074275	0.0259127			1.058	-0.00208643	0.0679115	0.00936778	0.00300433	0.074275	0.0157312			1.058	-0.00208643	0.0679115	-0.00208643	0.224452	0.0348216	0.0819111			1.058	0.0857292	0.074275	0.0602754			1.058	0.08955	0.13664	0.71062			1.058
	1.059	0.000458949	-0.00844988	-0.0466306	0.0259127	-0.0262675	0.0068224			1.059	0.0590027	0.037367	0.121365	0.0360943	0.0653661	0.0322762			1.059	0.000458949	0.0704569	0.00427702	0.00809509	0.0831838	0.020822			1.059	0.000458949	0.0704569	-0.0173587	0.170999	0.0526392	0.078093			1.059	0.0933653	0.0717296	0.078093			1.059	0.07937	0.21427	0.68008			1.059
	1.06	-0.00208643	-0.016086	-0.0631755	-0.00208643	-0.0186314	-0.0122679			1.06	0.05773	0.0310035	0.12391	0.0386396	0.0539119	0.0386396			1.06	0.0068224	0.0653661	0.000458949	-0.000813741	0.0691842	0.0259127			1.06	0.0068224	0.0653661	-0.00208643	0.150636	0.0437304	0.0768203			1.06	0.0844565	0.0908199	0.061548			1.06	0.06537	0.25245	0.68389			1.06
	1.061	-0.00844988	0.00936778	-0.0606302	-0.0122679	-0.0122679	0.00427702			1.061	0.061548	0.0310035	0.10991	0.0335489	0.0640934	0.0437304			1.061	-0.000813741	0.0628207	0.0131859	0.0068224	0.0679115	0.0068224			1.061	-0.000813741	0.0628207	-0.0109953	0.0997288	0.0348216	0.0831838			1.061	0.078093	0.0895472	0.061548			1.061	0.08446	0.27027	0.70426			1.061
	1.062	-0.00972257	0.00300433	-0.0466306	0.020822	-0.0300856	0.00300433			1.062	0.0602754	0.0335489	0.125183	0.0284581	0.0717296	0.0526392			1.062	-0.00463181	0.0628207	0.00300433	-0.000813741	0.0704569	0.0246401			1.062	-0.00463181	0.0628207	-0.000813741	0.101001	0.0399123	0.05773			1.062	0.0908199	0.0768203	0.0653661			1.062	0.06918	0.27027	0.69789			1.062
	1.063	0.00554971	-0.0059045	-0.069539	-0.000813741	-0.0186314	0.0106405			1.063	0.0602754	0.0335489	0.108638	0.0284581	0.0526392	0.0475485			1.063	-0.00208643	0.0679115	0.0246401	0.00554971	0.0717296	0.0399123			1.063	-0.00208643	0.0679115	-0.000813741	0.0971834	0.0691842	0.0640934			1.063	0.0895472	0.0895472	0.05773			1.063	0.07809	0.241	0.76153			1.063
	1.064	-0.0122679	-0.00208643	-0.0568121	0.0119132	-0.00717719	-0.00335912			1.064	0.0564573	0.0310035	0.111183	0.0271854	0.0933653	0.0195493			1.064	-0.0109953	0.0908199	0.0131859	0.0106405	0.05773	0.0310035			1.064	-0.0109953	0.0908199	0.0106405	0.111183	0.0526392	0.0882745			1.064	0.0971834	0.0806384	0.0564573			1.064	0.07809	0.269	0.78571			1.064
	1.065	-0.00208643	0.00300433	-0.049176	-0.00335912	-0.0249948	-0.0173587			1.065	0.0564573	0.037367	0.112456	0.0259127	0.0653661	0.0437304			1.065	-0.00844988	0.074275	0.0157312	0.00300433	0.0679115	0.0233674			1.065	-0.00844988	0.074275	0.0106405	0.103547	0.0475485	0.0691842			1.065	0.0819111	0.0755476	0.05773			1.065	0.08446	0.26518	0.8188			1.065
	1.066	-0.0211768	-0.000813741	-0.0504486	0.0195493	-0.0211768	0.00300433			1.066	0.0640934	0.0360943	0.132819	0.0322762	0.061548	0.0513665			1.066	0.0131859	0.0844565	0.0182766	0.0068224	0.0590027	0.0182766			1.066	0.0131859	0.0844565	0.00809509	0.135364	0.0564573	0.0666388			1.066	0.106092	0.0768203	0.0551846			1.066	0.05773	0.22445	0.83025			1.066
	1.067	-0.000813741	0.00300433	-0.0619029	0.0157312	-0.0122679	-0.0122679			1.067	0.0691842	0.0246401	0.112456	0.0259127	0.0704569	0.0424577			1.067	0.00300433	0.0984561	0.00427702	-0.00463181	0.0539119	0.0195493			1.067	0.00300433	0.0984561	0.0322762	0.135364	0.0679115	0.0831838			1.067	0.0857292	0.0768203	0.0679115			1.067	0.06155	0.20409	0.82771			1.067
	1.068	0.00300433	-0.0109953	-0.0644482	-0.00463181	-0.016086	0.000458949			1.068	0.0539119	0.0322762	0.125183	0.0310035	0.0691842	0.041185			1.068	-0.00208643	0.0908199	0.0119132	0.0119132	0.0628207	0.0220947			1.068	-0.00208643	0.0908199	0.0310035	0.120092	0.0564573	0.078093			1.068	0.101001	0.0704569	0.0539119			1.068	0.06918	0.15191	0.82134			1.068
	1.069	-0.00972257	0.0131859	-0.0580848	0.0068224	-0.0249948	-0.0059045			1.069	0.0640934	0.0335489	0.115001	0.0360943	0.0628207	0.0348216			1.069	-0.00717719	0.104819	-0.00208643	0.0068224	0.0755476	0.0220947			1.069	-0.00717719	0.104819	0.0322762	0.118819	0.0539119	0.0831838			1.069	0.0997288	0.0857292	0.0526392			1.069	0.06791	0.11246	0.82134			1.069
	1.07	-0.00335912	-0.00717719	-0.0606302	0.00936778	-0.0173587	-0.00463181			1.07	0.061548	0.0335489	0.12391	0.0437304	0.0844565	0.0500939			1.07	0.00300433	0.078093	0.0119132	0.00554971	0.061548	0.0170039			1.07	0.00300433	0.078093	0.0322762	0.115001	0.0526392	0.0933653			1.07	0.0997288	0.0730023	0.0653661			1.07	0.06282	0.10864	0.8048			1.07
	1.071	-0.0199041	0.00173164	-0.0720844	-0.000813741	-0.0224495	0.00173164			1.071	0.0640934	0.037367	0.107365	0.020822	0.0640934	0.0310035			1.071	0.00427702	0.0997288	0.0106405	-0.00208643	0.0755476	0.0284581			1.071	0.00427702	0.0997288	0.0246401	0.10991	0.0640934	0.0844565			1.071	0.0933653	0.0831838	0.0653661			1.071	0.08318	0.12136	0.78698			1.071
	1.072	0.000458949	-0.0109953	-0.052994	0.0119132	-0.0237222	-0.000813741			1.072	0.074275	0.0360943	0.122637	0.0360943	0.0704569	0.0488212			1.072	-0.00208643	0.0730023	0.0131859	0.00936778	0.0730023	0.0233674			1.072	-0.00208643	0.0730023	0.0488212	0.113728	0.0526392	0.074275			1.072	0.113728	0.078093	0.0717296			1.072	0.07046	0.12391	0.72971			1.072
	1.073	0.00173164	-0.00463181	-0.0466306	0.00427702	-0.0122679	0.00300433			1.073	0.0666388	0.0335489	0.115001	0.0360943	0.0704569	0.0551846			1.073	-0.016086	0.0679115	0.0106405	0.00554971	0.0704569	0.0246401			1.073	-0.016086	0.0679115	0.0590027	0.113728	0.0564573	0.0666388			1.073	0.0908199	0.0857292	0.061548			1.073	0.06537	0.13027	0.6928			1.073
	1.074	-0.00717719	0.000458949	-0.0517213	0.0220947	-0.0186314	-0.00717719			1.074	0.0653661	0.0386396	0.10991	0.0335489	0.0679115	0.0488212			1.074	0.0068224	0.0857292	0.0195493	-0.00335912	0.0691842	0.0182766			1.074	0.0068224	0.0857292	0.037367	0.115001	0.0640934	0.078093			1.074	0.112456	0.0704569	0.0679115			1.074	0.06664	0.13664	0.68389			1.074
	1.075	-0.0059045	0.00300433	-0.0657209	0.00554971	-0.00972257	0.0068224			1.075	0.0628207	0.0322762	0.120092	0.0450031	0.0844565	0.037367			1.075	0.00300433	0.0640934	0.00809509	0.0131859	0.0920926	0.0233674			1.075	0.00300433	0.0640934	0.0437304	0.106092	0.0526392	0.0882745			1.075	0.111183	0.0920926	0.0602754			1.075	0.06409	0.20282	0.68135			1.075
	1.076	-0.0148133	0.000458949	-0.0619029	0.0106405	-0.0300856	-0.00972257			1.076	0.061548	0.0360943	0.103547	0.0246401	0.05773	0.0450031			1.076	-0.00844988	0.0755476	0.0119132	0.00936778	0.0882745	0.0284581			1.076	-0.00844988	0.0755476	0.0590027	0.125183	0.0717296	0.0768203			1.076	0.102274	0.0730023	0.0704569			1.076	0.05264	0.22063	0.68517			1.076
	1.077	-0.00463181	0.0119132	-0.0580848	0.0106405	-0.0122679	-0.00717719			1.077	0.0666388	0.0360943	0.127728	0.0297308	0.061548	0.0462758			1.077	0.0220947	0.078093	0.00554971	-0.00208643	0.0819111	0.0271854			1.077	0.0220947	0.078093	0.0551846	0.135364	0.078093	0.0857292			1.077	0.107365	0.0819111	0.0462758			1.077	0.04882	0.241	0.69026			1.077
	1.078	-0.0059045	-0.0122679	-0.0479033	-0.00208643	-0.00717719	0.0170039			1.078	0.0691842	0.0348216	0.120092	0.0348216	0.074275	0.0386396			1.078	0.00554971	0.074275	-0.00208643	0.00427702	0.0717296	0.0259127			1.078	0.00554971	0.074275	0.05773	0.113728	0.0768203	0.0666388			1.078	0.104819	0.0844565	0.0666388			1.078	0.05391	0.26391	0.68898			1.078
	1.079	-0.00208643	-0.00844988	-0.0644482	0.0170039	-0.0237222	-0.0122679			1.079	0.05773	0.0335489	0.10991	0.0475485	0.0666388	0.0564573			1.079	-0.00717719	0.078093	0.0233674	0.000458949	0.0768203	0.0233674			1.079	-0.00717719	0.078093	0.0653661	0.111183	0.0564573	0.0768203			1.079	0.117546	0.0730023	0.0691842			1.079	0.05518	0.27663	0.73098			1.079
	1.08	0.00427702	-0.00335912	-0.0669936	0.0131859	-0.00717719	-0.0122679			1.08	0.0679115	0.041185	0.113728	0.0246401	0.0691842	0.0513665			1.08	0.0106405	0.0793657	0.00300433	0.00427702	0.05773	0.0271854			1.08	0.0106405	0.0793657	0.0590027	0.106092	0.0806384	0.0640934			1.08	0.0806384	0.0831838	0.0488212			1.08	0.05264	0.27918	0.76535			1.08
	1.081	0.00300433	-0.0148133	-0.0580848	0.00427702	-0.0109953	0.000458949			1.081	0.0653661	0.0437304	0.116274	0.0246401	0.0653661	0.0322762			1.081	0.00809509	0.0640934	0.0182766	0.00936778	0.0882745	0.0170039			1.081	0.00809509	0.0640934	0.078093	0.122637	0.107365	0.0640934			1.081	0.108638	0.0691842	0.0564573			1.081	0.04373	0.26263	0.80989			1.081
	1.082	0.0068224	0.00173164	-0.052994	0.00809509	-0.00844988	-0.0237222			1.082	0.0679115	0.0450031	0.111183	0.0360943	0.074275	0.0424577			1.082	-0.00208643	0.0755476	0.00554971	0.0170039	0.0844565	0.0220947			1.082	-0.00208643	0.0755476	0.0539119	0.116274	0.0717296	0.061548			1.082	0.0997288	0.0768203	0.0539119			1.082	0.04882	0.25372	0.84171			1.082
	1.083	-0.0122679	-0.00463181	-0.052994	-0.00463181	-0.0275402	-0.0135406			1.083	0.0730023	0.0437304	0.108638	0.041185	0.0640934	0.0386396			1.083	0.000458949	0.0691842	-0.000813741	0.00427702	0.078093	0.0220947			1.083	0.000458949	0.0691842	0.0704569	0.117546	0.0933653	0.0768203			1.083	0.112456	0.0844565	0.05773			1.083	0.04628	0.21045	0.8468			1.083
	1.084	-0.00463181	-0.00463181	-0.0606302	0.00809509	-0.00717719	0.00300433			1.084	0.0513665	0.0348216	0.121365	0.0335489	0.0526392	0.0450031			1.084	-0.000813741	0.0806384	0.00936778	0.00173164	0.078093	0.0233674			1.084	-0.000813741	0.0806384	0.0691842	0.10991	0.0920926	0.0730023			1.084	0.0920926	0.0793657	0.0475485			1.084	0.04882	0.16464	0.8328			1.084
	1.085	-0.00972257	0.00809509	-0.0593575	0.0259127	-0.0275402	-0.00463181			1.085	0.0526392	0.0386396	0.125183	0.0348216	0.0628207	0.0500939			1.085	-0.00208643	0.0895472	0.0068224	0.00300433	0.0870019	0.0335489			1.085	-0.00208643	0.0895472	0.0679115	0.12391	0.0997288	0.0895472			1.085	0.0895472	0.0831838	0.0590027			1.085	0.02464	0.15445	0.83407			1.085
	1.086	-0.0109953	-0.0173587	-0.0504486	0.0068224	-0.0224495	-0.00208643			1.086	0.0717296	0.0335489	0.127728	0.0348216	0.0679115	0.0450031			1.086	0.00173164	0.0666388	0.0106405	0.020822	0.0882745	0.0246401			1.086	0.00173164	0.0666388	0.074275	0.121365	0.0971834	0.0602754			1.086	0.0844565	0.0819111	0.0513665			1.086	0.02209	0.10736	0.78825			1.086
	1.087	-0.0109953	-0.016086	-0.0631755	0.0195493	-0.016086	0.0144585			1.087	0.0539119	0.041185	0.112456	0.0462758	0.0691842	0.0475485			1.087	0.00300433	0.0806384	0.000458949	0.0119132	0.0717296	0.0182766			1.087	0.00300433	0.0806384	0.0882745	0.0997288	0.0870019	0.0844565			1.087	0.0920926	0.078093	0.0602754			1.087	0.02082	0.09464	0.8048			1.087
	1.088	-0.00463181	0.000458949	-0.0555394	0.000458949	-0.00335912	0.0144585			1.088	0.05773	0.0360943	0.116274	0.0437304	0.0653661	0.0259127			1.088	0.0068224	0.0704569	0.00554971	0.0144585	0.0806384	0.0297308			1.088	0.0068224	0.0704569	0.0717296	0.112456	0.0882745	0.0691842			1.088	0.103547	0.074275	0.061548			1.088	0.02464	0.08827	0.77425			1.088
	1.089	-0.00844988	0.0106405	-0.0555394	0.00300433	-0.0249948	-0.0109953			1.089	0.0793657	0.0310035	0.101001	0.0360943	0.0691842	0.0488212			1.089	-0.0059045	0.0755476	0.0106405	-0.0059045	0.0691842	0.0246401			1.089	-0.0059045	0.0755476	0.0755476	0.120092	0.0933653	0.0653661			1.089	0.0870019	0.0882745	0.05773			1.089	0.03609	0.08955	0.71953			1.089
	1.09	-0.0237222	0.00173164	-0.0440852	-0.00717719	-0.00463181	0.00300433			1.09	0.0653661	0.0310035	0.126455	0.0246401	0.0640934	0.0475485			1.09	0.00300433	0.061548	0.0220947	0.0106405	0.0870019	0.0195493			1.09	0.00300433	0.061548	0.0730023	0.112456	0.0539119	0.074275			1.09	0.113728	0.0831838	0.0437304			1.09	0.017	0.12009	0.71189			1.09
	1.091	-0.00844988	-0.0135406	-0.0415398	0.00427702	-0.0211768	0.00809509			1.091	0.0539119	0.0348216	0.111183	0.0386396	0.0653661	0.0284581			1.091	-0.00972257	0.0704569	-0.00972257	0.00936778	0.0920926	0.0259127			1.091	-0.00972257	0.0704569	0.0806384	0.120092	0.078093	0.0691842			1.091	0.101001	0.074275	0.0564573			1.091	0.00682	0.14427	0.67244			1.091
	1.092	0.00173164	-0.0122679	-0.0555394	0.00936778	-0.0339037	0.00809509			1.092	0.0768203	0.0437304	0.115001	0.0271854	0.0679115	0.0437304			1.092	-0.0059045	0.0730023	0.0157312	0.0068224	0.0844565	0.0170039			1.092	-0.0059045	0.0730023	0.0870019	0.108638	0.094638	0.0730023			1.092	0.0984561	0.0679115	0.0564573			1.092	0.01573	0.18882	0.63935			1.092
	1.093	-0.00972257	0.000458949	-0.0517213	0.00809509	-0.0109953	0.00173164			1.093	0.0704569	0.0297308	0.111183	0.020822	0.0666388	0.0488212			1.093	0.0106405	0.0717296	0.0131859	0.000458949	0.0691842	0.0195493			1.093	0.0106405	0.0717296	0.074275	0.120092	0.0971834	0.0831838			1.093	0.10991	0.0704569	0.0793657			1.093	0.0081	0.23082	0.67244			1.093
	1.094	-0.00208643	-0.000813741	-0.0542667	0.0233674	-0.016086	0.00809509			1.094	0.0564573	0.0297308	0.122637	0.0462758	0.0551846	0.0437304			1.094	-0.00335912	0.0857292	0.0246401	0.0246401	0.0857292	0.0182766			1.094	-0.00335912	0.0857292	0.094638	0.108638	0.0959107	0.0602754			1.094	0.126455	0.0793657	0.0717296			1.094	0.00046	0.21554	0.69789			1.094
	1.095	-0.0199041	0.000458949	-0.0606302	0.00300433	-0.0135406	-0.00717719			1.095	0.0564573	0.0271854	0.104819	0.0220947	0.0640934	0.0590027			1.095	0.00554971	0.074275	0.0259127	-0.00972257	0.0844565	0.0271854			1.095	0.00554971	0.074275	0.0768203	0.111183	0.0984561	0.0691842			1.095	0.112456	0.061548	0.0730023			1.095	0.01064	0.24609	0.68517			1.095
	1.096	-0.0059045	-0.00335912	-0.0657209	0.00554971	-0.00972257	0.00173164			1.096	0.0666388	0.0284581	0.0997288	0.0271854	0.061548	0.0297308			1.096	-0.0059045	0.05773	0.0106405	0.00300433	0.0844565	0.0195493			1.096	-0.0059045	0.05773	0.0844565	0.10991	0.104819	0.0895472			1.096	0.107365	0.0717296	0.0844565			1.096	-0.00845	0.26263	0.71953			1.096
	1.097	-0.00717719	-0.00972257	-0.0479033	0.0259127	-0.0135406	0.0233674			1.097	0.0704569	0.0284581	0.113728	0.0271854	0.0526392	0.037367			1.097	0.00554971	0.0437304	0.00427702	0.0144585	0.0857292	0.0220947			1.097	0.00554971	0.0437304	0.0679115	0.101001	0.113728	0.0730023			1.097	0.117546	0.0653661	0.078093			1.097	-0.00081	0.25245	0.73226			1.097
	1.098	-0.00208643	-0.0059045	-0.0479033	0.00554971	-0.0199041	0.0119132			1.098	0.0628207	0.0297308	0.120092	0.0450031	0.078093	0.0450031			1.098	0.0131859	0.0564573	0.0131859	-0.00208643	0.074275	0.0284581			1.098	0.0131859	0.0564573	0.0895472	0.116274	0.101001	0.0793657			1.098	0.10991	0.0691842	0.0793657			1.098	-0.00336	0.24609	0.78571			1.098
	1.099	-0.0173587	0.00427702	-0.0631755	0.00554971	-0.0199041	0.0157312			1.099	0.0602754	0.0399123	0.10991	0.00554971	0.0488212	0.0475485			1.099	-0.00463181	0.0551846	0.0068224	0.00936778	0.074275	0.0131859			1.099	-0.00463181	0.0551846	0.0857292	0.107365	0.120092	0.0691842			1.099	0.120092	0.0819111	0.0513665			1.099	0.00428	0.24227	0.79334			1.099
	1.1	-0.0173587	-0.0135406	-0.069539	0.0131859	-0.0288129	0.0182766			1.1	0.0590027	0.037367	0.112456	0.0322762	0.0526392	0.0284581			1.1	-0.00972257	0.0564573	0.00427702	0.00300433	0.0730023	0.0144585			1.1	-0.00972257	0.0564573	0.0691842	0.112456	0.112456	0.0793657			1.1	0.115001	0.0513665	0.0539119			1.1	0.02209	0.19264	0.80607			1.1
	1.101	-0.00335912	0.0119132	-0.049176	0.00809509	-0.00972257	0.00300433			1.101	0.0679115	0.0322762	0.107365	0.0259127	0.0704569	0.0310035			1.101	-0.0275402	0.0539119	-0.00208643	0.00809509	0.074275	0.020822			1.101	-0.0275402	0.0539119	0.078093	0.111183	0.104819	0.0666388			1.101	0.118819	0.094638	0.0691842			1.101	0.02719	0.13409	0.81625			1.101
	1.102	-0.0211768	0.00300433	-0.0593575	0.00809509	-0.0173587	0.0131859			1.102	0.0691842	0.0310035	0.116274	0.0271854	0.0679115	0.0500939			1.102	-0.00208643	0.0526392	0.00936778	0.0131859	0.0844565	0.0157312			1.102	-0.00208643	0.0526392	0.0920926	0.108638	0.10991	0.0755476			1.102	0.103547	0.0691842	0.0386396			1.102	0.04882	0.12264	0.79716			1.102
	1.103	-0.0135406	-0.00717719	-0.049176	0.0068224	-0.0224495	0.00809509			1.103	0.061548	0.0271854	0.118819	0.0157312	0.0335489	0.0297308			1.103	0.000458949	0.0513665	0.0131859	0.0119132	0.0717296	0.0195493			1.103	0.000458949	0.0513665	0.0768203	0.10991	0.122637	0.0768203			1.103	0.120092	0.0666388	0.0310035			1.103	0.03737	0.10227	0.78698			1.103
	1.104	-0.00208643	-0.00717719	-0.0657209	-0.000813741	-0.0122679	0.00173164			1.104	0.0691842	0.020822	0.104819	0.0348216	0.05773	0.0475485			1.104	-0.00717719	0.0539119	0.0119132	0.00300433	0.0844565	0.0322762			1.104	-0.00717719	0.0539119	0.0653661	0.111183	0.113728	0.0730023			1.104	0.116274	0.0691842	0.0284581			1.104	0.04119	0.14682	0.76407			1.104
	1.105	-0.0186314	-0.00717719	-0.0644482	0.0106405	-0.0199041	0.00300433			1.105	0.0679115	0.0297308	0.107365	0.037367	0.0628207	0.0360943			1.105	0.0068224	0.0666388	0.00809509	-0.000813741	0.074275	0.0144585			1.105	0.0068224	0.0666388	0.0819111	0.118819	0.112456	0.0870019			1.105	0.117546	0.0755476	0.0488212			1.105	0.05137	0.12518	0.71571			1.105
	1.106	-0.0122679	-0.0109953	-0.052994	0.0182766	-0.0288129	0.0119132			1.106	0.0717296	0.0284581	0.120092	0.0271854	0.0806384	0.0284581			1.106	0.0106405	0.0386396	0.0144585	0.00427702	0.0819111	0.00427702			1.106	0.0106405	0.0386396	0.0666388	0.10991	0.107365	0.0819111			1.106	0.120092	0.0628207	0.041185			1.106	0.04119	0.11373	0.68771			1.106
	1.107	0.00300433	-0.00335912	-0.0631755	-0.00335912	-0.000813741	0.0233674			1.107	0.0602754	0.0246401	0.103547	0.0284581	0.0564573	0.0259127			1.107	-0.00463181	0.0462758	0.000458949	0.0246401	0.0882745	0.0233674			1.107	-0.00463181	0.0462758	0.0895472	0.103547	0.112456	0.0793657			1.107	0.116274	0.0679115	0.037367			1.107	0.04755	0.13027	0.68135			1.107
	1.108	-0.00717719	-0.00844988	-0.0720844	0.00554971	-0.0300856	0.00809509			1.108	0.0526392	0.0284581	0.116274	0.0131859	0.0488212	0.037367			1.108	-0.00844988	0.0348216	0.0170039	0.00809509	0.0730023	0.020822			1.108	-0.00844988	0.0348216	0.0564573	0.121365	0.125183	0.0755476			1.108	0.108638	0.074275	0.0246401			1.108	0.03737	0.16209	0.67117			1.108
	1.109	-0.0135406	-0.00972257	-0.0720844	0.00554971	-0.00463181	-0.0122679			1.109	0.0679115	0.0182766	0.104819	0.0195493	0.0437304	0.0310035			1.109	0.00300433	0.0424577	-0.00463181	0.000458949	0.0730023	0.0233674			1.109	0.00300433	0.0424577	0.0590027	0.111183	0.117546	0.0806384			1.109	0.113728	0.0768203	0.0335489			1.109	0.04246	0.21173	0.67371			1.109
	1.11	-0.0109953	0.00173164	-0.0555394	0.00554971	-0.0148133	0.00936778			1.11	0.0590027	0.0246401	0.0971834	0.0259127	0.0513665	0.0424577			1.11	-0.0148133	0.0233674	0.0284581	0.00936778	0.0806384	0.0284581			1.11	-0.0148133	0.0233674	0.0653661	0.103547	0.10991	0.0882745			1.11	0.0908199	0.0730023	0.0297308			1.11	0.04246	0.241	0.64571			1.11
	1.111	0.00300433	-0.00717719	-0.0580848	0.00809509	-0.0173587	0.00809509			1.111	0.061548	0.0284581	0.0984561	0.0259127	0.0539119	0.0310035			1.111	-0.00717719	0.0310035	0.00427702	0.0170039	0.078093	0.0220947			1.111	-0.00717719	0.0310035	0.05773	0.117546	0.102274	0.0691842			1.111	0.107365	0.0551846	0.0348216			1.111	0.04882	0.26772	0.66098			1.111
	1.112	-0.00335912	-0.00844988	-0.0428125	0.0131859	-0.0109953	0.00809509			1.112	0.0640934	0.0195493	0.104819	0.0119132	0.0500939	0.0450031			1.112	-0.00463181	0.0360943	0.0119132	0.00173164	0.0819111	0.0233674			1.112	-0.00463181	0.0360943	0.0539119	0.103547	0.104819	0.0704569			1.112	0.118819	0.061548	0.0297308			1.112	0.02719	0.269	0.70426			1.112
	1.113	-0.0135406	-0.0122679	-0.0428125	0.0106405	-0.0237222	0.00936778			1.113	0.0704569	0.0233674	0.103547	0.0450031	0.0500939	0.0475485			1.113	0.00300433	0.0170039	0.00173164	0.00427702	0.0653661	0.0271854			1.113	0.00300433	0.0170039	0.0691842	0.113728	0.118819	0.0844565			1.113	0.116274	0.061548	0.0259127			1.113	0.02209	0.27154	0.73226			1.113
	1.114	-0.0275402	0.00300433	-0.0606302	0.000458949	-0.0173587	0.00173164			1.114	0.0691842	0.0195493	0.113728	0.00936778	0.05773	0.0310035			1.114	0.00554971	0.0131859	-0.00208643	0.00936778	0.0870019	0.0157312			1.114	0.00554971	0.0131859	0.0488212	0.10991	0.111183	0.074275			1.114	0.108638	0.0730023	0.0233674			1.114	0.03864	0.24863	0.78062			1.114
	1.115	-0.0275402	-0.00717719	-0.0631755	-0.00335912	-0.0249948	0.00554971			1.115	0.061548	0.020822	0.102274	0.0348216	0.0539119	0.020822			1.115	-0.00717719	0.0068224	0.0144585	0.0119132	0.0908199	0.0170039			1.115	-0.00717719	0.0068224	0.061548	0.10991	0.101001	0.0590027			1.115	0.115001	0.0730023	0.0271854			1.115	0.01191	0.24227	0.80225			1.115
	1.116	-0.0173587	-0.0109953	-0.0631755	0.00173164	-0.0249948	-0.0059045			1.116	0.0539119	0.0259127	0.107365	0.0220947	0.061548	0.0297308			1.116	0.00173164	0.0157312	-0.00208643	0.000458949	0.0768203	0.0233674			1.116	0.00173164	0.0157312	0.0450031	0.102274	0.104819	0.0640934			1.116	0.130273	0.061548	0.0284581			1.116	0.04246	0.23972	0.81371			1.116
	1.117	-0.0199041	-0.0122679	-0.0644482	-0.0059045	-0.0351764	0.0131859			1.117	0.0679115	0.0131859	0.102274	0.0233674	0.0462758	0.0399123			1.117	-0.00208643	0.0233674	0.00300433	0.000458949	0.0640934	0.00427702			1.117	-0.00208643	0.0233674	0.0297308	0.0997288	0.0997288	0.0730023			1.117	0.121365	0.074275	0.0475485			1.117	0.02719	0.17354	0.79971			1.117
	1.118	-0.0186314	-0.00208643	-0.0593575	0.0131859	-0.00208643	0.0233674			1.118	0.0590027	0.020822	0.0997288	0.0170039	0.05773	0.0233674			1.118	-0.0148133	0.0131859	0.0068224	0.0182766	0.074275	0.0246401			1.118	-0.0148133	0.0131859	0.0488212	0.111183	0.0933653	0.0704569			1.118	0.117546	0.0730023	0.0526392			1.118	0.03864	0.14555	0.80734			1.118
	1.119	-0.00463181	0.00300433	-0.0631755	0.0246401	-0.0199041	0.0106405			1.119	0.0691842	0.0170039	0.0882745	0.0182766	0.0437304	0.0437304			1.119	-0.016086	0.00809509	0.00936778	0.0157312	0.0844565	0.020822			1.119	-0.016086	0.00809509	0.0386396	0.12391	0.0997288	0.0755476			1.119	0.116274	0.0679115	0.0284581			1.119	0.04119	0.12264	0.80862			1.119
	1.12	-0.0148133	-0.0122679	-0.0542667	0.0106405	-0.00844988	0.0157312			1.12	0.0628207	0.0195493	0.0984561	0.0271854	0.0475485	0.0106405			1.12	-0.0059045	0.00554971	0.00427702	0.0182766	0.0666388	0.020822			1.12	-0.0059045	0.00554971	0.0348216	0.10991	0.0831838	0.0768203			1.12	0.130273	0.0666388	0.0539119			1.12	0.04628	0.08064	0.79207			1.12
	1.121	-0.0186314	-0.0135406	-0.0631755	0.00427702	-0.0211768	0.00173164			1.121	0.0602754	0.0170039	0.107365	0.0182766	0.0590027	0.037367			1.121	0.00173164	0.0386396	0.0157312	0.0106405	0.0793657	0.0195493			1.121	0.00173164	0.0386396	0.0335489	0.107365	0.0806384	0.0704569			1.121	0.111183	0.0551846	0.0539119			1.121	0.03228	0.09846	0.7488			1.121
	1.122	-0.0109953	-0.0211768	-0.069539	0.0119132	-0.0377217	-0.00844988			1.122	0.0666388	0.0182766	0.0920926	0.0157312	0.0399123	0.0170039			1.122	-0.000813741	0.00936778	0.00554971	-0.000813741	0.0844565	0.0170039			1.122	-0.000813741	0.00936778	0.0284581	0.111183	0.0819111	0.0819111			1.122	0.117546	0.0590027	0.0488212			1.122	0.03737	0.09464	0.70044			1.122
	1.123	-0.0173587	0.0106405	-0.0797205	0.0195493	-0.0249948	-0.00844988			1.123	0.0526392	0.0246401	0.111183	0.0360943	0.0462758	0.0437304			1.123	-0.00844988	0.0131859	0.00554971	0.00936778	0.0730023	0.0170039			1.123	-0.00844988	0.0131859	0.0233674	0.106092	0.0933653	0.0895472			1.123	0.122637	0.0666388	0.0437304			1.123	0.04119	0.10227	0.6788			1.123
	1.124	-0.0135406	-0.016086	-0.0568121	0.0131859	-0.016086	0.0131859			1.124	0.0640934	0.0259127	0.106092	0.0284581	0.0386396	0.0322762			1.124	-0.0237222	0.00936778	0.0157312	0.0119132	0.0793657	0.0170039			1.124	-0.0237222	0.00936778	0.0335489	0.107365	0.078093	0.0768203			1.124	0.108638	0.0691842	0.037367			1.124	0.02973	0.11882	0.64571			1.124
	1.125	-0.0122679	-0.0148133	-0.0542667	0.00936778	-0.0275402	0.0068224			1.125	0.0551846	0.0119132	0.094638	0.00427702	0.0386396	0.0182766			1.125	-0.00208643	-0.000813741	0.0170039	0.0131859	0.0768203	0.0220947			1.125	-0.00208643	-0.000813741	0.0195493	0.111183	0.078093	0.0730023			1.125	0.127728	0.05773	0.0399123			1.125	0.03355	0.15445	0.64953			1.125
	1.126	-0.0109953	-0.0249948	-0.0682663	-0.00208643	-0.0300856	-0.00463181			1.126	0.0602754	0.0195493	0.0997288	0.0335489	0.0475485	0.0157312			1.126	-0.000813741	-0.0262675	0.00173164	0.0144585	0.0793657	0.0246401			1.126	-0.000813741	-0.0262675	0.020822	0.108638	0.0793657	0.0691842			1.126	0.115001	0.0602754	0.041185			1.126	0.02209	0.16973	0.64699			1.126
	1.127	-0.0211768	-0.00463181	-0.049176	0.00554971	-0.0199041	0.0170039			1.127	0.0628207	0.0131859	0.0768203	0.00554971	0.0539119	0.0246401			1.127	-0.00972257	-0.0135406	0.0233674	-0.00208643	0.0793657	0.0271854			1.127	-0.00972257	-0.0135406	0.0297308	0.107365	0.0653661	0.074275			1.127	0.130273	0.0513665	0.037367			1.127	0.02464	0.185	0.6508			1.127
	1.128	-0.0122679	-0.0109953	-0.0593575	0.00936778	-0.0199041	0.0131859			1.128	0.0564573	0.0106405	0.107365	0.0119132	0.0386396	0.0360943			1.128	-0.0122679	-0.0148133	0.020822	0.0182766	0.0819111	0.0322762			1.128	-0.0122679	-0.0148133	0.00427702	0.104819	0.0679115	0.0819111			1.128	0.129001	0.0539119	0.0157312			1.128	0.03991	0.25245	0.65589			1.128
	1.129	-0.00844988	-0.0122679	-0.0568121	0.00809509	-0.00717719	0.00554971			1.129	0.0628207	0.00936778	0.103547	0.00554971	0.037367	0.00809509			1.129	-0.016086	0.00809509	0.00300433	0.0157312	0.0628207	0.0068224			1.129	-0.016086	0.00809509	0.020822	0.10991	0.074275	0.0500939			1.129	0.111183	0.0628207	0.0259127			1.129	0.03355	0.25372	0.67117			1.129
	1.13	-0.00844988	-0.00717719	-0.0797205	0.000458949	-0.0249948	-0.00208643			1.13	0.0640934	0.00809509	0.0895472	0.0271854	0.0500939	0.0310035			1.13	-0.00463181	-0.00335912	0.00300433	0.00554971	0.074275	0.0220947			1.13	-0.00463181	-0.00335912	0.0182766	0.111183	0.078093	0.0704569			1.13	0.127728	0.0590027	0.0513665			1.13	0.03482	0.24609	0.71189			1.13
	1.131	-0.0211768	-0.0173587	-0.0669936	0.0259127	-0.036449	0.00173164			1.131	0.05773	-0.00208643	0.094638	0.0360943	0.0386396	0.0220947			1.131	-0.00208643	-0.00463181	-0.0122679	0.0131859	0.0857292	0.020822			1.131	-0.00208643	-0.00463181	0.0068224	0.115001	0.0564573	0.0475485			1.131	0.10991	0.0590027	0.0437304			1.131	0.03864	0.22954	0.76662			1.131
	1.132	-0.00972257	-0.0109953	-0.0657209	0.0106405	-0.0262675	0.000458949			1.132	0.0640934	0.0068224	0.108638	0.00300433	0.0590027	0.0182766			1.132	0.00809509	0.0220947	-0.000813741	-0.00208643	0.0704569	0.0259127			1.132	0.00809509	0.0220947	-0.00335912	0.102274	0.0666388	0.0768203			1.132	0.125183	0.0679115	0.0195493			1.132	0.02337	0.21809	0.76153			1.132
	1.133	-0.0122679	-0.00717719	-0.0555394	0.0131859	-0.0135406	0.00936778			1.133	0.0628207	0.0195493	0.0997288	0.0284581	0.0513665	0.0195493			1.133	-0.00463181	0.0310035	0.0119132	-0.00208643	0.0628207	0.0284581			1.133	-0.00463181	0.0310035	0.00173164	0.108638	0.0640934	0.0666388			1.133	0.131546	0.0551846	0.0348216			1.133	0.04246	0.17991	0.78953			1.133
	1.134	-0.0173587	-0.0059045	-0.0619029	0.00173164	-0.0199041	0.00427702			1.134	0.05773	0.00554971	0.0997288	0.0284581	0.0437304	0.0271854			1.134	-0.00335912	0.0246401	0.0170039	0.00300433	0.0730023	0.0284581			1.134	-0.00335912	0.0246401	0.0182766	0.115001	0.0564573	0.0653661			1.134	0.10991	0.05773	0.0437304			1.134	0.02337	0.14173	0.78698			1.134
[truncated: 6,865 more rows]
[truncated: 8 more columns]
