# Supplementary material for: Crystal structures of bacterial small multidrug resistance transporter EmrE in complex with structurally diverse substrates
Source: eLife. 2022 Mar 7;11:e76766. doi: 10.7554/eLife.76766 (PMC9000954; doi:10.7554/eLife.76766)
Supplement: Figure 6—figure supplement 2—source data 1. [file elife-76766-fig6-figsupp2-data1.xlsx]

## Sheet: Sheet1
Monomer A (Crystal nomenclature)										Monomer B (Crystal nomenclature)
		experimental (BMRB accession number 50411)	Larmorca prediction: crystal	Larmorca prediction: NMR	Larmorca error (crystal)	Larmorca error (NMR)	Comparison					experimental (BMRB accession number 50411)	Larmorca prediction: crystal	Larmoric prediction: NMR	Larmorca error (crystal)	Larmorca error (NMR)	Comparison
ILE	5	64.432	64.3528	59.9507	-0.0792	-4.4813	-4.4021			TYR	6	60.334	59.9032	60.3953	-0.4308	0.0613	0.3695
TYR	6	60.393	59.8107	60.604	-0.5823	0.211	0.3713			LEU	7	57.592	57.9975	57.1973	0.4055	-0.3947	0.0108
LEU	7	57.22	57.9827	57.6232	0.7627	0.4032	0.3595			GLY	8	47.433	46.7662	46.6068	-0.6668	-0.8262	-0.1594
GLY	8	47.468	46.7765	46.7619	-0.6915	-0.7061	-0.0146			GLY	9	47.293	47.106	46.9231	-0.187	-0.3699	-0.1829
GLY	9	47.854	47.1346	46.818	-0.7194	-1.036	-0.3166			ALA	10	55.245	55.4101	55.208	0.1651	-0.037	0.1281
ALA	10	55.36	55.3942	55.3799	0.0342	0.0199	0.0143				11
ILE	11	64.39	65.561	64.8921	1.171	0.5021	0.6689				12
LEU	12	57.351	57.8255	57.7686	0.4745	0.4176	0.0569			ALA	13	55.557	55.0922	55.2353	-0.4648	-0.3217	0.1431
ALA	13	55.278	55.2022	55.2862	-0.0758	0.0082	0.0676			GLU	14	59.245	59.4485	59.5429	0.2035	0.2979	-0.0944
GLU	14	61.056	59.4124	59.3437	-1.6436	-1.7123	-0.0687				15
VAL	15	65.419	66.739	66.7551	1.32	1.3361	-0.0161			ILE	16	64.651	65.2482	65.1509	0.5972	0.4999	0.0973
ILE	16	65.59	65.2014	64.7655	-0.3886	-0.8245	-0.4359			GLY	17	47.402	47.6989	47.7104	0.2969	0.3084	-0.0115
GLY	17	48.224	47.6887	47.3649	-0.5353	-0.8591	-0.3238			THR	18	66.811	66.8965	67.0675	0.0855	0.2565	-0.171
THR	18	65.784	66.79	65.5788	1.006	-0.2052	0.8008				19
THR	19	67.518	66.7213	65.3859	-0.7967	-2.1321	-1.3354			LEU	20	58.135	57.7338	58.2844	-0.4012	0.1494	0.2518
LEU	20	58.088	57.8162	57.5652	-0.2718	-0.5228	-0.251			MET	21	59.18	58.68	59.0597	-0.5	-0.1203	0.3797
MET	21	58.474	57.9072	57.3923	-0.5668	-1.0817	-0.5149			LYS	22	58.688	58.5128	59.0508	-0.1752	0.3628	-0.1876
LYS	22	59.507	58.8691	55.853	-0.6379	-3.654	-3.0161				23
PHE	23	59.746	59.5155	57.2363	-0.2305	-2.5097	-2.2792				24
SER	24	60.43	58.6368	57.853	-1.7932	-2.577	-0.7838
										GLY	26	46.783	47.5147	45.6234	0.7317	-1.1596	-0.4279
GLY	26	46.2	47.4004	44.6784	1.2004	-1.5216	-0.3212				27
PHE	27	60.154	58.2817	57.524	-1.8723	-2.63	-0.7577			THR	28	61.811	62.3724	61.6644	0.5614	-0.1466	0.4148
THR	28	61.688	61.7067	60.9922	0.0187	-0.6958	-0.6771			ARG	29	54.112	55.8501	57.1894	1.7381	3.0774	-1.3393
ARG	29	53.892	56.1095	57.2645	2.2175	3.3725	-1.155			LEU	30	59.736	58.2276	54.5597	-1.5084	-5.1763	-3.6679
LEU	30	59.706	56.2193	55.3426	-3.4867	-4.3634	-0.8767
										SER	33	63.751	62.7424	61.6235	-1.0086	-2.1275	-1.1189
SER	33	63.984	62.4161	62.1059	-1.5679	-1.8781	-0.3102
										GLY	35	48.031	47.1169	46.8643	-0.9141	-1.1667	-0.2526
GLY	35	48.053	47.0338	46.8309	-1.0192	-1.2221	-0.2029			THR	36	68.6	67.3399	66.8524	-1.2601	-1.7476	-0.4875
THR	36	68.661	67.3257	66.4378	-1.3353	-2.2232	-0.8879			ILE	37	65.666	65.6442	65.643	-0.0218	-0.023	-0.0012
ILE	37	65.535	65.6241	64.8195	0.0891	-0.7155	-0.6264			ILE	38	65.71	65.1635	64.7944	-0.5465	-0.9156	-0.3691
ILE	38	65.814	65.0574	64.7289	-0.7566	-1.0851	-0.3285			CYS	39	65.35	60.975	61.2485	-4.375	-4.1015	0.2735
										TYR	40	57.768	61.6558	60.5441	3.8878	2.7761	1.1117
TYR	40	57.744	61.6472	61.3585	3.9032	3.6145	0.2887
				61.2661						ALA	42	55.323	55.3251	55.3223	0.0021	-0.0007	0.0014
ALA	42	55.278	55.1507	55.0275	-0.1273	-0.2505	-0.1232			SER	43	62.273	61.9972	62.1211	-0.2758	-0.1519	0.1239
SER	43	62.832	62.1052	62.5423	-0.7268	-0.2897	0.4371
										TRP		62.857	61.225	61.3995	-1.632	-1.4575	0.1745
										LEU		58.077	58.0626	58.1131	-0.0144	0.0361	-0.0217
										LEU		57.44	58.0603	57.6907	0.6203	0.2507	0.3696
										ALA	48	55.597	54.9505	55.2547	-0.6465	-0.3423	0.3042
ALA	48	55.364	54.9475	55.3552	-0.4165	-0.0088	0.4077			GLN	49	55.951	59.1104	58.9931	3.1594	3.0421	0.1173
GLN	49	55.98	58.464	58.9115	2.484	2.9315	-0.4475
										LEU	51	55.209	57.3785	57.7308	2.1695	2.5218	-0.3523
LEU	51	55.882	57.3276	57.3449	1.4456	1.4629	-0.0173			ALA	52	53.139	54.4283	54.4619	1.2893	1.3229	-0.0336
ALA	52	53.114	54.1068	54.1914	0.9928	1.0774	-0.0846			TYR	53	58.025	58.1764	57.9139	0.1514	-0.1111	0.0403
TYR	53	57.867	57.7968	58.3965	-0.0702	0.5295	-0.4593
											55
PRO	55	62.613	62.4916	62.3802	-0.1214	-0.2328	-0.1114				56
THR	56	66.164	65.423	66.0913	-0.741	-0.0727	0.6683			GLY	57	47.236	48.0074	47.8196	0.7714	0.5836	0.1878
GLY	57	46.849	47.8883	47.5584	1.0393	0.7094	0.3299			ILE	58	64.945	64.5213	63.9431	-0.4237	-1.0019	-0.5782
ILE	58	64.271	63.6784	63.8909	-0.5926	-0.3801	0.2125			ALA	59	55.584	55.1873	55.196	-0.3967	-0.388	0.0087
ALA	59	55.523	55.1094	55.1127	-0.4136	-0.4103	0.0033				60
TYR	60	60.776	60.6798	61.3368	-0.0962	0.5608	-0.4646			ALA	61	55.023	55.2895	55.2692	0.2665	0.2462	0.0203
ALA	61	55.508	55.363	55.3163	-0.145	-0.1917	-0.0467			ILE	62	66.35	64.9117	64.7468	-1.4383	-1.6032	-0.1649
ILE	62	65.516	64.8368	64.5362	-0.6792	-0.9798	-0.3006			TRP	63	60.003	61.2868	60.8498	1.2838	0.8468	0.437
TRP	63	59.863	61.2483	60.9626	1.3853	1.0996	0.2857
										GLY	65	46.876	47.6887	47.9524	0.8127	1.0764	-0.2637
GLY	65	47.772	47.3918	47.3345	-0.3802	-0.4375	-0.0573			VAL	66	67.062	66.7378	66.5104	-0.3242	-0.5516	-0.2274
VAL	66	65.667	66.5061	65.9425	0.8391	0.2755	0.5636			GLY	67	47.383	47.196	46.7908	-0.187	-0.5922	-0.4052
GLY	67	47.114	47.2689	47.4492	0.1549	0.3352	-0.1803			ILE	68	60.258	64.9656	64.8756	4.7076	4.6176	0.09
ILE	68	65.632	64.743	64.302	-0.889	-1.33	-0.441				69			66.5669
VAL	69	67.893	66.2613	66.2275	-1.6317	-1.6655	-0.0338			LEU	70	57.775	57.6917	58.3666	-0.0833	0.5916	-0.5083
LEU	70	58.281	58.3234	58.1573	0.0424	-0.1237	-0.0813			ILE	71	64.51	65.8154	64.3509	1.3054	-0.1591	1.1463
ILE	71	61.222	64.458	64.9688	3.236	3.7468	-0.5108				72
SER	72	63.272	62.0171	62.1723	-1.2549	-1.0997	0.1552				73
LEU	73	58.17	58.4376	58.4308	0.2676	0.2608	0.0068			LEU	74	58.277	57.44	57.6525	-0.837	-0.6245	0.2125
LEU	74	58.324	57.6574	57.5376	-0.6666	-0.7864	-0.1198			SER	75	62.116	62.5801	61.6611	0.4641	-0.4549	0.0092
SER	75	62.255	61.9069	62.5376	-0.3481	0.2826	0.0655			TRP	76	58.594	60.5476	58.0674	1.9536	-0.5266	1.427
TRP	76	58.615	60.7429	60.2953	2.1279	1.6803	0.4476			GLY	77	46.77	46.5933	45.9241	-0.1767	-0.8459	-0.6692
GLY	77	47.711	47.0653	46.6725	-0.6457	-1.0385	-0.3928			PHE	78	58.262	59.002	56.2374	0.74	-2.0246	-1.2846
PHE	78	60.845	58.8203	58.9596	-2.0247	-1.8854	0.1393			PHE	79	56.351	58.1128	57.3606	1.7618	1.0096	0.7522
PHE	79	55.579	56.7774	57.5455	1.1984	1.9665	-0.7681			GLY	80	46.346	45.0297	45.7605	-1.3163	-0.5855	0.7308
GLY	80	46.4	44.5252	46.1452	-1.8748	-0.2548	1.62				81
GLN	81	56.437	55.353	54.728	-1.084	-1.709	-0.625				82
ARG	82	54.946	57.1865	54.9485	2.2405	0.0025	2.238			LEU	83	54.131	54.9276	55.0493	0.7966	0.9183	-0.1217
LEU	83	52.948	54.6219	56.1588	1.6739	3.2108	-1.5369			ASP	84	50.834	53.4259	52.509	2.5919	1.675	0.9169
ASP	84	50.66	54.3924	53.4877	3.7324	2.8277	0.9047			LEU		59.292	54.3349	58.7354	-4.9571	-0.5566	4.4005
										PRO	86	66.481	63.6508	65.2886	-2.8302	-1.1924	1.6378
PRO	86	66.473	62.5874	65.0408	-3.8856	-1.4322	2.4534			ALA	87	55.677	53.9393	55.3868	-1.7377	-0.2902	1.4475
ALA	87	55.683	51.4979	55.2383	-4.1851	-0.4447	3.7404			ILE	88	64.412	63.6436	65.4887	-0.7684	1.0767	-0.3083
ILE	88	64.459	63.7761	64.4585	-0.6829	-0.0005	0.6824			ILE	89	64.671	64.5223	64.812	-0.1487	0.141	0.0077
ILE	89	64.636	64.3645	64.7399	-0.2715	0.1039	0.1676			GLY	90	47.748	48.0087	48.1876	0.2607	0.4396	-0.1789
GLY	90	47.63	47.6818	47.5408	0.0518	-0.0892	-0.0374			MET	91	60.081	58.6682	59.0745	-1.4128	-1.0065	0.4063
MET	91	60.32	57.9918	58.6953	-2.3282	-1.6247	0.7035			MET	92	59.546	58.319	58.6612	-1.227	-0.8848	0.3422
MET	92	59.947	58.9645	58.0483	-0.9825	-1.8987	-0.9162
										ALA	96	55.07	55.2257	54.9103	0.1557	-0.1597	-0.004
ALA	96	55.07	55.0244	55.0834	-0.0456	0.0134	0.0322			GLY	97	48.692	47.7544	48.0904	-0.9376	-0.6016	0.336
GLY	97	48.514	47.661	47.5499	-0.853	-0.9641	-0.1111
										ASN	102	56.48	53.1085	54.7045	-3.3715	-1.7755	1.596
ASN	102	56.154	54.2104	55.3001	-1.9436	-0.8539	1.0897			LEU	103	56.172	55.2866	55.8122	-0.8854	-0.3598	0.5256
LEU	103	54.735	55.4974	57.0468	0.7624	2.3118	-1.5494
